# Supplementary material for: Red blood cells release microparticles containing human argonaute 2 and miRNAs to target genes of Plasmodium falciparum
Source: PubMed Central journal article supplement (PMC5583671; doi:10.1038/emi.2017.63), 2017-08-23
Supplement: emi201763x1.pdf [file emi201763x1.pdf]

Supplementary Figure S1 Flow cytometric analysis of the transfer potential of FITC-Dextran towards nRBCs.

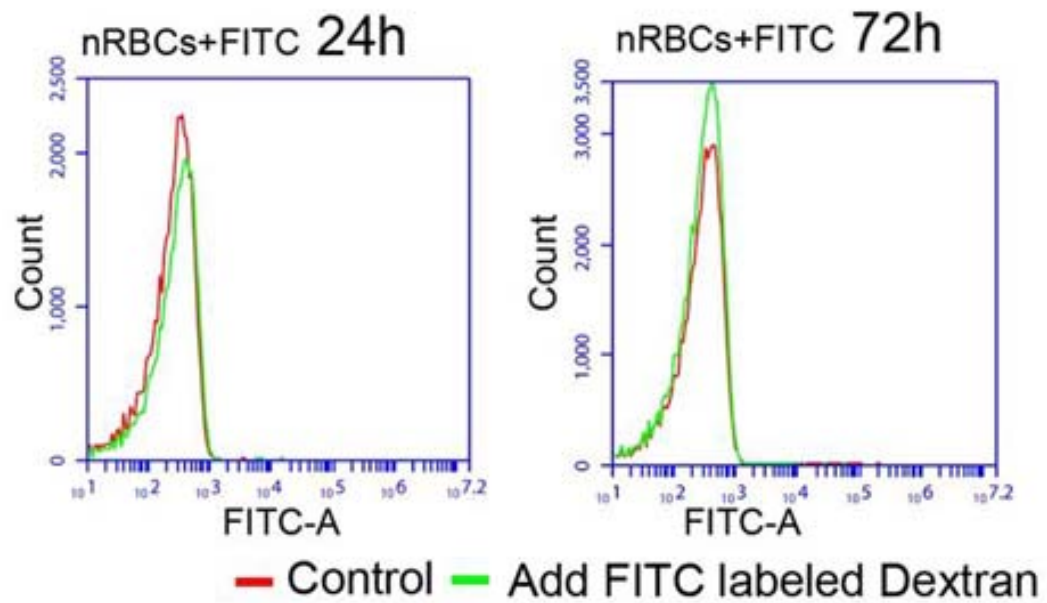

$5 \times 10^7$  nRBCs were cultured in medium containing 0.5 mg/ml FITC-Dextran for 24 and 72 h. The FITC-nRBCs were analyzed by flow cytometry at 24 and 72 h ( $n=3$ ). Red lines and green lines indicate control nRBCs and FITC-nRBCs, respectively.
