# Supplementary material for: Red blood cells release microparticles containing human argonaute 2 and miRNAs to target genes of Plasmodium falciparum
Source: PubMed Central journal article supplement (PMC5583671; doi:10.1038/emi.2017.63), 2017-08-23
Supplement: emi201763x5.pdf [file emi201763x5.pdf]

Supplementary Figure S5 Dual-luciferase assay of the interactions between site-mutated UTRs from *var* and hmiRNAs.

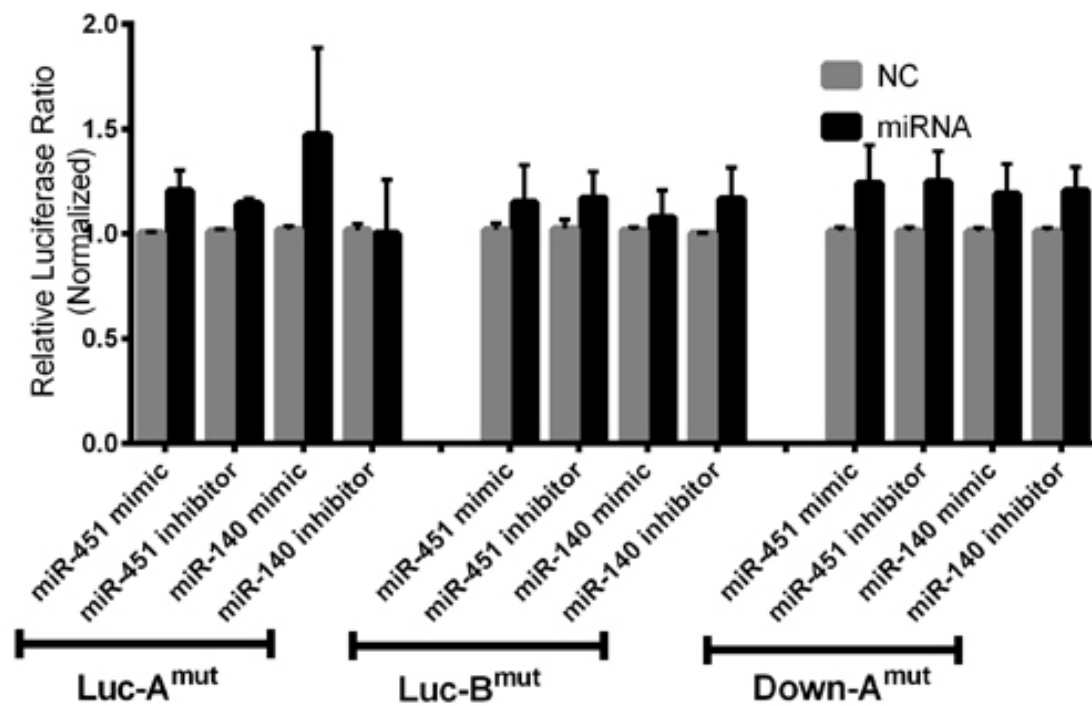

Luc-A<sup>mut</sup>/B<sup>mut</sup> and Down-A<sup>mut</sup> represent firefly luciferase constructs containing site-mutated 5'UTRs from *var* group A/B and site-mutated 3'UTRs from *var* group A, respectively. miRNA: luciferase reporter constructs co-transfected with miR-451 or miR-140 mimics or inhibitors; NC: negative control without co-transfection of miRNAs ( $n=3$ ).
