# Supplementary material for: Red blood cells release microparticles containing human argonaute 2 and miRNAs to target genes of Plasmodium falciparum
Source: PubMed Central journal article supplement (PMC5583671; doi:10.1038/emi.2017.63), 2017-08-23
Supplement: emi201763x6.pdf [file emi201763x6.pdf]

Supplementary Table S1 Sequences of reverse transcription primers and qRT-PCR primers\*

| Primer ID                 | Sequences                                               |
|---------------------------|---------------------------------------------------------|
| For human miRNAs          |                                                         |
| miR-451 RT                | GTCGTATCCAGTGCAGGGTCCGAGGTATTCGCAC<br>TGGATACGACAACTCA  |
| miR-451 forward           | CACGCAAACCGTTACCATTACT                                  |
| miR-486 RT                | GTCGTATCCAGTGCAGGGTCCGAGGTATTCGCAC<br>TGGATACGACACTCGGG |
| miR-486 forward           | CACGCATCCTGTACTGAGCTGCCC                                |
| miR-181a RT               | GTCGTATCCAGTGCAGGGTCCGAGGTATTCGCAC<br>TGGATACGACAACTCA  |
| miR-181a forward          | CACGCAAACATTCAACGCTGTCGG                                |
| General Reverse**         | CCAGTGCAGGGTCCGAGGTA                                    |
| For <i>var</i> genes      |                                                         |
| PF3D7_0712000-up          | ATATGGGAAGGGATGCTCTG                                    |
| PF3D7_0712000-down        | TGAACCATCGAAGGAATTGA                                    |
| PF3D7_0412700-up          | AAACACGTTGAATGGCGATA                                    |
| PF3D7_0412700-down        | GACGCCGAGGAGGTAAATAG                                    |
| PF3D7_0412900-up          | TGACCAAGACGAAGTATGGAA                                   |
| PF3D7_0412900-down        | TTGATCTCTGTTCGCTGTCC                                    |
| PF3D7_0800100-up          | GTCGTGGAAAACGAAAGGT                                     |
| PF3D7_0800100-down        | TATCTATCCAGGGCCCAAAG                                    |
| PF3D7_0223500-up          | CAATTTTGGGTGTGGAATCA                                    |
| PF3D7_0223500-down        | CACTGGCCACCAAGTGTATC                                    |
| PF3D7_1200100-up          | CGGAGGAGGAAAAACAAGAG                                    |
| PF3D7_1200100-down        | TGCCGTATTTGAGACCACAT                                    |
| PF3D7_0400400-up          | GTTGAGTCTGCGGCAATAGA                                    |
| PF3D7_0400400-down        | CTGGGGTTTGTTCACACTG                                     |
| PF3D7_0425800-up          | TAAAAGACGCCAACAGATGC                                    |
| PF3D7_0425800-down        | TCATCGTCTTCGTCTTCGTC                                    |
| PF3D7_0937600-up          | ACTTTCTGGTGGGGAATCAG                                    |
| PF3D7_0937600-down        | TTCACCGCCACTTACTTCAG                                    |
| serine tRNA ligase-up     | AAGTAGCAGGTCATCGTGGTT                                   |
| serine tRNA ligase-down   | TTCGGCACATTCTTCATAA                                     |
| arginine tRNA ligase-up   | AAGAGATGCATGTTGGTC                                      |
| arginine tRNA ligase-down | GTACCCCAATCACCTACA                                      |

\*Due to the stem-loop structure designed in reverse transcription primers, the lengths of PCR products were extended to 69 base pairs.

\*\*This primer is universal for PCR amplification of miR-451, miR-486, and miR-181a.
