# Supplementary material for: Red blood cells release microparticles containing human argonaute 2 and miRNAs to target genes of Plasmodium falciparum
Source: PubMed Central journal article supplement (PMC5583671; doi:10.1038/emi.2017.63), 2017-08-23
Supplement: emi201763x7.pdf [file emi201763x7.pdf]

Supplementary Table S2 Oligonucleotide probe sequences used in Northern blot and fluorescence *in situ* hybridization

| Probe ID           | Sequences and modification   |
|--------------------|------------------------------|
| miR-451 DNA probe  | DIG*-AACTCAGTAATGGTAACGGTTT  |
| miR-486 DNA probe  | DIG-CTCGGGGCAGCTCAGTACAGGA   |
| miR-181a DNA probe | DIG-ACTCACCGACAGCGTTGAATGTT  |
| miR-451 probe      | FAM**-AACTCAGTAATGGTAACGGTTT |
| Scramble probe     | FAM-GTGTAACACGTCTATACGCCCA   |

\*Digoxigenin labeling.

\*\*Carboxyfluorescein labeling.
