# Supplementary material for: Red blood cells release microparticles containing human argonaute 2 and miRNAs to target genes of Plasmodium falciparum
Source: PubMed Central journal article supplement (PMC5583671; doi:10.1038/emi.2017.63), 2017-08-23
Supplement: emi201763x8.pdf [file emi201763x8.pdf]

Supplementary Table S3 Primer sequences related to the amplification of *var*

| Primers ID            | Sequences                                      |
|-----------------------|------------------------------------------------|
| DBL1 $\alpha$ -EcoR I | CGGAATTCCGCCAATATCAGCAAAACTTCGTGC              |
| reverse               |                                                |
| <i>varA</i> forward   | CCAAGCTTGGA ACTTACCATAAAATTATCATCAA            |
| <i>varA</i> reverse   | CGGAATTCCGTCACCTACAACAAATGTAATAAA              |
| <i>varB</i> forward   | CCAAGCTTGGCTCATT TATAATTTTACAAAATAAATAA<br>AAC |
| <i>varB</i> reverse   | CGGAATTCCGTTATGGGAGTATAGTGATATGGTAGAAT         |
| <i>varC</i> forward   | CCAAGCTTGGAATATTCATATTCCCACATTGTCATATAT        |
| <i>varC</i> reverse   | CGGAATTCCGATTATGTGGTAATATCATGTAATGG            |
| DownA forward         | CCGCTCGAGCGGCGGATGTATGGAATATAT                 |
| DownA reverse         | GCTCTAGAGCTACTATTACATAATACATTC                 |
