# Supplementary material for: Red blood cells release microparticles containing human argonaute 2 and miRNAs to target genes of Plasmodium falciparum
Source: PubMed Central journal article supplement (PMC5583671; doi:10.1038/emi.2017.63), 2017-08-23
Supplement: emi201763x9.pdf [file emi201763x9.pdf]

Supplementary Table S4 Sequences of miRNA mimics and inhibitors in dual-luciferase

reporter assay

| ID                | Sequences and modifications (5' labeled)                              |
|-------------------|-----------------------------------------------------------------------|
| miR-451 mimic     | FAM*-5'-AAACCGUUACCAUUACUGAGUU-3'<br>3'-CCCAGUAAUGGUAACGGUUUUU-5'-FAM |
| miR-451 inhibitor | FAM-5'-AACUCAGUAAUGGUAACGGUUU-3'                                      |
| miR-140 mimic     | FAM-5'-UACCACAGGGUAGAACCACGG-3'<br>3'-GUGGUUCUACCCUGUGGUAUU-5' -FAM   |
| miR-140 inhibitor | FAM-5'-CCGUGGUUCUACCCUGUGGUA-3'                                       |
| Negative control  | FAM-5'-UUCUCCGAACGUGUCACGUTT-3'<br>3'-ACGUGACACGUUCGGAGAATT-5'-FAM    |

\*Carboxyfluorescein labeling.
