# Supplementary material for: Red blood cells release microparticles containing human argonaute 2 and miRNAs to target genes of Plasmodium falciparum
Source: PubMed Central journal article supplement (PMC5583671; doi:10.1038/emi.2017.63), 2017-08-23
Supplement: emi201763x10.pdf [file emi201763x10.pdf]

Supplementary Table S5 The target site prediction of human miRNAs in UTR of *var* genes

Seq ID length Sequence  
 5'UTR of 147 AACTTACCATAAAATTATCATCAAATTATATATATATATA *CACTACT*7TAGCACTATTGAATAAAATATA  
*var* GCATAAAAAAATTATACATATAATGGCAAACCTTTGGTATCGAAAAAATATTTAATTTATTACATTT  
 group A GTTGTAGGTGA

Note: the target sites are shown in italic

Target Prediction:

| microRN<br>A   | Position<br>in UTR | Seed  | dGduplex | dGopen | ddG    | Seq                                           | Target<br>site            | Num of<br>Matches | Mutated<br>seq | Mutation<br>primers<br>Up:ATCA<br>TCAAATT<br>ATATATA<br>TATATAA<br>ATTGCAT<br>AGCACT<br>ATTG;Do<br>wn:ATGC<br>TATATTT<br>TATTCAA<br>TAGTGCT<br>ATGCAAT<br>TTATATA<br>TA |
|----------------|--------------------|-------|----------|--------|--------|-----------------------------------------------|---------------------------|-------------------|----------------|-------------------------------------------------------------------------------------------------------------------------------------------------------------------------|
| hsa-miR-140-5p | 39                 | 8:1:1 | -7.87    | -7.08  | -0.78  | CAGUGG<br>UUUUAC<br>CCUAUG<br>GUAG            | CACTACT<br>T              | 8                 | AATTGCA<br>T   |                                                                                                                                                                         |
| hsa-miR-574-5p | 37                 | 8:1:1 | -16.7    | -6.21  | -10.48 | UGAGUG<br>UGUGUG<br>UGUGAG<br>UGUGU<br>UAAAGU | TACACTA<br>CTTAGCA<br>C   | 8                 |                |                                                                                                                                                                         |
| hsa-miR-20a    | 48                 | 8:1:0 | -14.7    | -5.6   | -9.09  | GCUUUA<br>AGUGCA<br>GGUAG                     | GCACTAT<br>T              | 8                 |                |                                                                                                                                                                         |
| hsa-miR-525-5p | 99                 | 8:1:1 | -16.4    | -7.58  | -8.81  | CUCCAG<br>AGGGAU<br>GCACUU<br>UCU             | CTTTGGT<br>ATCGAA<br>AA   | 8                 |                |                                                                                                                                                                         |
| hsa-miR-106b   | 48                 | 8:1:0 | -14.2    | -5.6   | -8.59  | UAAAGU<br>GCUGAC<br>AGUGCA<br>GAU             | GCACTAT<br>TGAATAA<br>AAT | 8                 |                |                                                                                                                                                                         |
| hsa-miR-20b    | 48                 | 8:1:0 | -14      | -5.6   | -8.39  | CAAAGU<br>GCUCAU<br>AGUGCA<br>GGUAG           | GCACTAT<br>TGAATAA<br>AAT | 8                 |                |                                                                                                                                                                         |
| hsa-miR-221    | 63                 | 8:1:0 | -13.5    | -5.81  | -7.68  | ACCUUG<br>CAUACA<br>AUGUAG<br>AUUU            | ATATAGC<br>ATAAAA<br>AAAT | 8                 |                |                                                                                                                                                                         |
| hsa-miR-17     | 48                 | 8:1:0 | -13      | -5.6   | -7.39  | CAAAGU<br>GCUUAC<br>AGUGCA<br>GGUAG           | GCACTAT<br>TG             | 8                 |                |                                                                                                                                                                         |
| hsa-miR-106a   | 48                 | 8:1:0 | -13      | -5.6   | -7.39  | AAAAGU<br>GCUUAC<br>AGUGCA<br>GGUAG           | GCACTAT<br>TGAATA         | 8                 |                |                                                                                                                                                                         |
| hsa-miR-1272   | 16                 | 8:1:0 | -9.5     | -2.29  | -7.2   | GAUGAU<br>GAUGGC<br>AGCAAA<br>UUCUGA<br>AA    | TCATCAA<br>AT             | 8                 |                |                                                                                                                                                                         |
| hsa-miR-93     | 48                 | 8:1:0 | -12.6    | -5.6   | -6.99  | CAAAGU<br>GCUGUU<br>CGUGCA<br>GGUAG           | GCACTAT<br>TGAATAA<br>AAT | 8                 |                |                                                                                                                                                                         |
| hsa-miR-200c   | 49                 | 8:1:0 | -12      | -5.61  | -6.38  | CGUCUU<br>ACCCAG<br>CAGUGU<br>UUGG            | CACTATT<br>GAA            | 8                 |                |                                                                                                                                                                         |

|                 |     |       |        |       |       |                                     |                           |   |
|-----------------|-----|-------|--------|-------|-------|-------------------------------------|---------------------------|---|
| hsa-miR-512-3p  | 46  | 8:1:1 | -11.8  | -5.64 | -6.15 | AAGUGC<br>UGUCAU<br>AGCUGA<br>GGUC  | TAGCACT<br>ATT            | 8 |
| hsa-let-7a      | 41  | 8:1:1 | -11.2  | -5.17 | -6.02 | UGAGGU<br>AGUAGG<br>UUGUAU<br>AGUU  | CTACTTA<br>GCACTAT<br>TGA | 8 |
| hsa-let-7b      | 41  | 8:1:1 | -10.9  | -5.17 | -5.72 | UGAGGU<br>AGUAGG<br>UUGUGU<br>GGUU  | CTACTTA<br>GC             | 8 |
| hsa-let-7c      | 41  | 8:1:1 | -10.9  | -5.17 | -5.72 | UGAGGU<br>AGUAGG<br>UUGUAU<br>GGUU  | CTACTTA<br>G              | 8 |
| hsa-miR-142-3p  | 38  | 8:1:0 | -12.77 | -7.08 | -5.68 | UGUAGU<br>GUUUCC<br>UACUUU<br>AUGGA | ACACTA<br>CTTAGCA<br>CTAT | 8 |
| hsa-miR-1282    | 93  | 8:1:0 | -13.26 | -7.79 | -5.46 | UCGUUU<br>GCCUUU<br>UUCUGC<br>UU    | GCAAAC<br>CTTTGGT<br>AT   | 8 |
| hsa-miR-155     | 67  | 8:1:0 | -9.4   | -4.03 | -5.36 | UUAAUG<br>CUAAUC<br>GUGAUA<br>GGGGU | AGCATA<br>AAAAAA<br>TT    | 8 |
| hsa-miR-433     | 15  | 8:1:1 | -7.5   | -2.19 | -5.3  | UACGGU<br>GAGCCU<br>GUCAUU<br>AUUC  | ATCATCA<br>AATTATA        | 8 |
| hsa-miR-129-5p  | 109 | 8:1:0 | -11.7  | -6.43 | -5.26 | CUUUUU<br>GCGGUC<br>UGGGCU<br>UGC   | GAAAAA<br>AATATTT<br>AAT  | 8 |
| hsa-let-7f      | 41  | 8:1:1 | -10.3  | -5.17 | -5.12 | UGAGGU<br>AGUAGA<br>UUGUAU<br>AGUU  | CTACTTA<br>GC             | 8 |
| hsa-miR-1270    | 15  | 8:1:1 | -7.3   | -2.19 | -5.1  | CUGGAG<br>AUAUGG<br>AAGAGC<br>UGUGU | ATCATCA<br>AAT            | 8 |
| hsa-let-7g      | 41  | 8:1:1 | -10    | -5.17 | -4.82 | UGAGGU<br>AGUAGU<br>UUGUAC<br>AGUU  | CTACTTA<br>G              | 8 |
| hsa-let-7i      | 41  | 8:1:1 | -9.7   | -5.17 | -4.52 | UGAGGU<br>AGUAGU<br>UUGUGC<br>UGUU  | CTACTTA<br>GCACTAT<br>TG  | 8 |
| hsa-miR-200b    | 49  | 8:1:0 | -10.1  | -5.61 | -4.48 | CAUCUU<br>ACUGGG<br>CAGCAU<br>UGGA  | CACTATT<br>G              | 8 |
| hsa-miR-372     | 47  | 8:1:1 | -9.8   | -5.67 | -4.12 | CCUCAA<br>AUGUGG<br>AGCACU<br>AUUCU | AGCACT<br>ATTGAA          | 8 |
| hsa-miR-520a-5p | 99  | 8:1:1 | -11.5  | -7.58 | -3.91 | CUCCAG<br>AGGGAA<br>GUACUU<br>UCU   | CTTTGGT<br>ATCGAA<br>A    | 8 |
| hsa-miR-199a-3p | 50  | 8:1:1 | -9.5   | -5.6  | -3.89 | ACAGUA<br>GUCUGC<br>ACAUUG<br>GUUA  | ACTATTG<br>AAT            | 8 |

|                 |     |       |       |       |       |                                              |                           |   |
|-----------------|-----|-------|-------|-------|-------|----------------------------------------------|---------------------------|---|
| hsa-miR-199b-3p | 50  | 8:1:1 | -9.5  | -5.6  | -3.89 | ACAGUA<br>GUCUGC<br>ACAUUG<br>GUUA<br>AUGUAU | ACTATTG<br>AAT            | 8 |
| hsa-miR-568     | 34  | 8:1:0 | -10   | -6.2  | -3.79 | AAAUGU<br>AUACAC<br>AC<br>GAAUGU             | ATATACA<br>CT             | 8 |
| hsa-miR-409-3p  | 49  | 8:1:1 | -9.4  | -5.61 | -3.78 | UGCUCG<br>GUGAAC<br>CCCU<br>UUA AUG          | CACTATT<br>GAATAA<br>AATA | 8 |
| hsa-miR-155     | 47  | 8:1:0 | -9.43 | -5.67 | -3.75 | CUAAUC<br>GUGUAU<br>GGGGU<br>CUUCUU          | AGCACT<br>ATTG            | 8 |
| hsa-miR-578     | 70  | 8:1:1 | -8.86 | -5.28 | -3.57 | GUGCUC<br>UAGGAU<br>UGU<br>AAAAGU            | ATAAAA<br>AAATTAT<br>ACAT | 8 |
| hsa-miR-548i    | 128 | 8:1:0 | -9.65 | -6.12 | -3.52 | AAUUGC<br>GGUUUU<br>UGCC<br>UACCAC           | TTACATT<br>TGTTG          | 8 |
| hsa-miR-140-3p  | 99  | 8:1:0 | -10.9 | -7.58 | -3.31 | AGGGUA<br>GAACCA<br>CGG<br>UUUCCA            | CTTTGGT<br>ATCGAA<br>AAAA | 8 |
| hsa-miR-587     | 52  | 8:1:0 | -8.7  | -5.6  | -3.09 | UAGGUG<br>AUGAGU<br>CAC<br>CUACAA            | TATTGAA<br>T              | 8 |
| hsa-miR-520d-5p | 100 | 8:1:1 | -10.6 | -7.55 | -3.04 | AGGGAA<br>GCCUUU<br>UC<br>UGAGGU             | TTTGTA<br>TCG             | 8 |
| hsa-miR-98      | 41  | 8:1:1 | -8.2  | -5.17 | -3.02 | AGUAAG<br>UUGUAU<br>UGUU<br>CUUAUG           | CTACTTA<br>GCAC           | 8 |
| hsa-miR-491-3p  | 67  | 8:1:0 | -7    | -4.03 | -2.96 | CAAGAU<br>UCCUUU<br>CUAC<br>AUGGAG           | AGCATA<br>AAAA            | 8 |
| hsa-miR-620     | 15  | 8:1:1 | -5.1  | -2.19 | -2.9  | AUAGAU<br>AUAGAA<br>AU<br>UGAUAU             | ATCATCA<br>AATTATA<br>T   | 8 |
| hsa-miR-190     | 114 | 8:1:1 | -9.7  | -6.83 | -2.86 | GUUUGA<br>UAUAUU<br>AGGU<br>UAGUAU           | AAATATT<br>TA             | 8 |
| hsa-miR-577     | 120 | 8:1:1 | -10   | -7.15 | -2.84 | AAAUAU<br>UGGUAC<br>CUG<br>UGGUUG            | TTAATTT<br>ATTAC          | 8 |
| hsa-miR-380     | 23  | 8:1:1 | -6.3  | -3.55 | -2.74 | ACCAUA<br>GAACAU<br>GCGC<br>ACAGUA           | ATTATAT<br>ATATATA<br>TAC | 8 |
| hsa-miR-936     | 50  | 8:1:1 | -8.2  | -5.6  | -2.59 | GAGGGA<br>GGAAUC<br>GCAG<br>AAAAGU           | ACTATTG<br>AATAAA<br>AT   | 8 |
| hsa-miR-548d-5p | 128 | 8:1:0 | -8.71 | -6.12 | -2.58 | AAUUGU<br>GGUUUU<br>UGCC                     | TTACATT<br>TGTTGT         | 8 |

|                 |     |       |       |       |       |                                              |                           |   |
|-----------------|-----|-------|-------|-------|-------|----------------------------------------------|---------------------------|---|
| hsa-let-7d      | 41  | 8:1:1 | -7.5  | -5.17 | -2.32 | AGAGGU<br>AGUAGG<br>UUGCAU<br>AGUU<br>AAAAGU | CTACTTA<br>GCACTAT<br>TGA | 8 |
| hsa-miR-548l    | 116 | 8:1:1 | -9    | -6.74 | -2.25 | AUUUGC<br>GGUUU<br>UGUC<br>UGAUAU            | ATATTTA<br>ATTTA          | 8 |
| hsa-miR-190b    | 114 | 8:1:1 | -8.9  | -6.83 | -2.06 | GUUUGA<br>UAUUGG<br>GUU<br>AAAAGU            | AAATATT<br>TAAT           | 8 |
| hsa-miR-548b-5p | 128 | 8:1:0 | -8.11 | -6.12 | -1.98 | AAUUGU<br>GGUUUU<br>GGCC<br>AAAAGU           | TTACATT<br>TGTT           | 8 |
| hsa-miR-548c-5p | 128 | 8:1:0 | -8.05 | -6.12 | -1.92 | AAUUGC<br>GGUUUU<br>UGCC<br>AUGUAU           | TTACATT<br>TGTTGTA<br>G   | 8 |
| hsa-miR-568     | 32  | 8:1:1 | -8    | -6.17 | -1.82 | AAUUGU<br>AUACAC<br>AC<br>AAAAGU             | ATATATA<br>C              | 8 |
| hsa-miR-548j    | 128 | 8:1:0 | -7.91 | -6.12 | -1.78 | AAUUGC<br>GGUCUU<br>UGGU<br>UCGCGG           | TTACATT<br>TGTTGTA<br>GGT | 8 |
| hsa-miR-579     | 20  | 8:1:1 | -5.1  | -3.46 | -1.63 | UUUGUG<br>CCAGAU<br>GACG<br>UGGUUG           | CAAATTA<br>TA             | 8 |
| hsa-miR-380     | 127 | 8:0:0 | -7.79 | -6.17 | -1.61 | ACCAUA<br>GAACAU<br>GCGC<br>UGGUUU           | ATTACAT<br>TTGTTGT<br>AGG | 8 |
| hsa-miR-299-5p  | 93  | 8:1:0 | -9.3  | -7.79 | -1.5  | ACCGUC<br>CCACAU<br>ACAU<br>UAAUUU           | GCAAAC<br>CTTTGGT         | 8 |
| hsa-miR-590-3p  | 59  | 8:1:0 | -7.7  | -6.19 | -1.5  | UAUGUA<br>UAAGCU<br>AGU<br>UAGGUA            | TAAAATA<br>TAGCATA        | 8 |
| hsa-miR-196a    | 40  | 8:1:1 | -7.19 | -5.77 | -1.41 | GUUUCA<br>UGUUGU<br>UGGG<br>UAAUAC           | ACTACTT<br>AGCA           | 8 |
| hsa-miR-429     | 49  | 8:1:1 | -7    | -5.61 | -1.38 | UGUCUG<br>GUAAAA<br>CCGU<br>UUGUAC           | CACTATT<br>GA             | 8 |
| hsa-miR-493     | 96  | 8:1:1 | -9.2  | -8.13 | -1.06 | AUGGUA<br>GGCUUU<br>CAUU<br>UCCCUG           | AACCTTT<br>GGTAT          | 8 |
| hsa-miR-1259    | 24  | 8:0:1 | -5    | -4.06 | -0.93 | AGACCC<br>UUUAAC<br>CUGUGA<br>UAGGUA         | TTATATA<br>TATATAT<br>ACA | 8 |
| hsa-miR-196b    | 40  | 8:1:1 | -6.7  | -5.77 | -0.92 | GUUUCC<br>UGUUGU<br>UGGG<br>UGGAGU           | ACTACTT<br>AGCACT<br>ATTG | 8 |
| hsa-miR-122     | 38  | 8:1:1 | -8.01 | -7.08 | -0.92 | GUGACA<br>AUGGUG<br>UUUG                     | ACACTA<br>CTTAGCA<br>CT   | 8 |

|                |     |       |       |       |        |                                                            |   |
|----------------|-----|-------|-------|-------|--------|------------------------------------------------------------|---|
| hsa-miR-206    | 130 | 8:1:1 | -8.6  | -7.87 | -0.72  | UGGAUU<br>GUAAGG ACATTTG<br>AAGUGU TTGTA<br>GUGG<br>CUACAA | 8 |
| hsa-miR-524-5p | 100 | 8:1:1 | -8.2  | -7.55 | -0.64  | AGGGAA TTTGGTA<br>GCACUU TCGAAA<br>UCUC AAA                | 8 |
| hsa-miR-1      | 130 | 8:1:1 | -8.5  | -7.87 | -0.62  | ACAUAC<br>UUCUUU ACATTTG<br>AUAUGC TTGTAGG<br>CCAU         | 8 |
| hsa-miR-449b   | 39  | 8:1:1 | -7.7  | -7.08 | -0.61  | AGGCAG<br>UGUAAU CACTACT<br>GUUAGC TAGC<br>UGGC            | 8 |
| hsa-miR-1826   | 16  | 8:1:0 | -2.9  | -2.29 | -0.6   | UUUGGC<br>AAUGGU TCATCAA<br>AGAACU AT                      | 8 |
| hsa-miR-590-3p | 19  | 8:1:0 | -4.1  | -3.5  | -0.59  | CACACU<br>UAAUUU<br>UAUGUA TCAAATT<br>UAAGCU ATATA<br>AGU  | 8 |
| hsa-miR-584    | 61  | 8:1:1 | -6.7  | -6.15 | -0.54  | UUUUGCC AAATATA<br>UGGGAC GCAT<br>UGAG                     | 8 |
| hsa-miR-454    | 128 | 8:1:1 | -6.65 | -6.12 | -0.52  | ACCCUA<br>UCAUA TTACATT<br>UUGUCU TGTTG<br>CUGC            | 8 |
| hsa-miR-449a   | 39  | 8:1:1 | -7.6  | -7.08 | -0.51  | UGGCAG<br>UGUAAU CACTACT<br>GUUAGC TAGCACT<br>UGGU A       | 8 |
| hsa-miR-1290   | 113 | 8:1:1 | -7.3  | -6.81 | -0.48  | UGGAUU<br>UUUGGA AAAATAT<br>UCAGGG TAA<br>A                | 8 |
| hsa-miR-448    | 34  | 8:1:1 | -6.5  | -6.2  | -0.29  | UUGCAU<br>AUGUAG ATATACA<br>GAUGUC CACTTA<br>CCAU G        | 8 |
| hsa-miR-539    | 123 | 8:1:1 | -6.93 | -6.7  | -0.22  | GGAGAA<br>AUUAUC ATTTATT<br>CUUGGU A<br>GUGU               | 8 |
| hsa-miR-34c-5p | 39  | 8:1:1 | -7.3  | -7.08 | -0.21  | AGGCAG<br>UGUAGU CACTACT<br>UAGCUG TA<br>AUUGC             | 8 |
| hsa-miR-450a   | 91  | 8:1:0 | -7.4  | -7.31 | -0.084 | UUUUGC<br>GAUGUG TGGCAA<br>UUCCUA ACCTT<br>AUAU            | 8 |
| hsa-miR-568    | 79  | 8:1:0 | -5.81 | -5.74 | -0.065 | AUGUAU<br>AAAUGU TTATACA<br>AUACAC TA<br>AC                | 8 |
| hsa-miR-203    | 117 | 8:1:1 | -6.8  | -6.74 | -0.056 | AGUGGU<br>UCUUA<br>CAGUUC TATTTAA<br>AACAGU TT<br>U        | 8 |
| hsa-miR-190    | 63  | 8:1:1 | -5.84 | -5.81 | -0.025 | UGAUAU<br>GUUUGA ATATAGC<br>UAUAUU A<br>AGGU               | 8 |

|                |     |       |       |       |        |                                     |                           |   |
|----------------|-----|-------|-------|-------|--------|-------------------------------------|---------------------------|---|
| hsa-miR-648    | 36  | 8:1:1 | -6.3  | -6.27 | -0.02  | AAGUGU<br>GCAGGG<br>CACUGG<br>U     | ATACACT<br>ACTT           | 8 |
| hsa-miR-659    | 56  | 8:1:1 | -6.1  | -6.08 | -0.012 | AGGACC<br>UUCCCU<br>GAACCA<br>AGGA  | GAATAA<br>AATAT           | 8 |
| hsa-miR-130b   | 128 | 8:1:1 | -6.05 | -6.12 | 0.072  | ACUCUU<br>UCCUG<br>UUGCAC<br>UAC    | TTACATT<br>TGTTGTA<br>G   | 8 |
| hsa-miR-633    | 50  | 8:1:1 | -5.5  | -5.6  | 0.1    | CUAAUA<br>GUAUCU<br>ACCACA<br>AUAUA | ACTATTG<br>AATAAA<br>ATAT | 8 |
| hsa-miR-568    | 24  | 8:1:1 | -3.9  | -4.06 | 0.16   | AUGUAU<br>AAAUGU<br>AUACAC<br>AC    | TTATATA<br>TATATAT<br>A   | 8 |
| hsa-miR-568    | 30  | 8:1:1 | -5.8  | -6.07 | 0.27   | AUGUAU<br>AAAUGU<br>AUACAC<br>AC    | ATATATA<br>TACACTA<br>C   | 8 |
| hsa-miR-548m   | 96  | 8:1:0 | -7.79 | -8.13 | 0.34   | CAAAGG<br>UAUUUG<br>UGGUUU<br>UUG   | AACCTTT<br>GGTATC<br>GAAA | 8 |
| hsa-miR-559    | 120 | 8:1:0 | -6.8  | -7.15 | 0.35   | UAAAGU<br>AAAUAU<br>GCACCA<br>AAA   | TTAATTT<br>A              | 8 |
| hsa-miR-1322   | 48  | 8:1:1 | -5.21 | -5.6  | 0.39   | GAUGAU<br>GCUGCU<br>GAUGCU<br>G     | GCACTAT<br>TGAATAA<br>A   | 8 |
| hsa-miR-301b   | 128 | 8:1:1 | -5.7  | -6.12 | 0.42   | GCUCUG<br>ACGAGG<br>UUGCAC<br>UACU  | TTACATT<br>T              | 8 |
| hsa-miR-590-3p | 74  | 8:1:0 | -4.9  | -5.47 | 0.57   | UAAUUU<br>UAUGUA<br>UAAGCU<br>AGU   | AAAAATT<br>ATACA          | 8 |
| hsa-miR-380    | 65  | 8:1:1 | -4.5  | -5.07 | 0.57   | UGGUUG<br>ACCAUA<br>GAACAU<br>GCGC  | ATAGCAT<br>AA             | 8 |
| hsa-miR-1278   | 39  | 8:1:0 | -6.5  | -7.08 | 0.58   | UAGUAC<br>UGUGCA<br>UAUCAU<br>CUAU  | CACTACT<br>TAGC           | 8 |
| hsa-miR-190b   | 63  | 8:1:1 | -5.2  | -5.81 | 0.61   | UGAUAU<br>GUUUGA<br>UAUUGG<br>GUU   | ATATAGC<br>ATAAA          | 8 |
| hsa-miR-337-3p | 64  | 8:1:0 | -4.3  | -5.09 | 0.79   | CUCCUA<br>UAUGAU<br>GCCUUU<br>CUUC  | TATAGCA<br>TAAA           | 8 |
| hsa-miR-301a   | 128 | 8:1:1 | -5.3  | -6.12 | 0.82   | GCUCUG<br>ACUUUA<br>UUGCAC<br>UACU  | TTACATT<br>TGTTGTA        | 8 |
| hsa-miR-331-5p | 81  | 8:1:1 | -5    | -5.84 | 0.84   | CUAGGU<br>AUGGUC<br>CCAGGG<br>AUCC  | ATACATA<br>TAATGG<br>CAAA | 8 |

|                 |     |       |       |        |      |                                              |                           |   |
|-----------------|-----|-------|-------|--------|------|----------------------------------------------|---------------------------|---|
| hsa-miR-28-3p   | 123 | 8:1:1 | -5.8  | -6.7   | 0.9  | CACUAG<br>AUUGUG<br>AGCUCC<br>UGGA           | ATTTATT<br>ACATTTG<br>TT  | 8 |
| hsa-miR-548a-5p | 128 | 8:1:0 | -5.21 | -6.12  | 0.91 | AAAAGU<br>AAUUGC<br>GAGUUU<br>UACC<br>CAGUGG | TTACATT<br>TGTTGTA<br>GGT | 8 |
| hsa-miR-140-5p  | 96  | 8:1:1 | -7.2  | -8.13  | 0.93 | UUUUAC<br>CCUAUG<br>GUAG<br>UCCCUG           | AACCTTT<br>GGTATC         | 8 |
| hsa-miR-1259    | 79  | 8:1:1 | -4.8  | -5.74  | 0.94 | AGACCC<br>UUUAAC<br>CUGUGA<br>UUCACA         | TTATACA<br>TATAA          | 8 |
| hsa-miR-130a    | 128 | 8:1:1 | -4.77 | -6.12  | 1.35 | UUUGUC<br>UACUGU<br>CUGC                     | TTACATT<br>TGTT           | 8 |
| hsa-miR-548h    | 128 | 8:1:0 | -4.61 | -6.12  | 1.51 | AAAAGU<br>AAUCGC<br>GGUUUU<br>UGUC           | TTACATT<br>TG             | 8 |
| hsa-miR-450a    | 107 | 8:1:0 | -4.5  | -6.08  | 1.58 | UUUUGC<br>GAUGUG<br>UUCCUA<br>AUAU<br>CCUCA  | TCGAAA<br>AAAA            | 8 |
| hsa-miR-372     | 40  | 8:1:1 | -4.17 | -5.77  | 1.6  | AUGUGG<br>AGCACU<br>AUUCU<br>GUGUCU          | ACTACTT<br>A              | 8 |
| hsa-miR-511     | 61  | 8:1:1 | -4.4  | -6.15  | 1.75 | UUUGCU<br>CUGCAG<br>UCA                      | AAATATA<br>GCA            | 8 |
| hsa-miR-885-5p  | 87  | 8:1:0 | -5.4  | -7.22  | 1.82 | UCCAUU<br>ACACUA<br>CCCUGC<br>CUCU           | ATAATG<br>GCAAAC<br>CTT   | 8 |
| hsa-miR-34a     | 39  | 8:1:1 | -5.1  | -7.08  | 1.98 | UGGCAG<br>UGUCUU<br>AGCUGG<br>UUGU           | CACTACT<br>TAGCACT<br>ATT | 8 |
| hsa-miR-643     | 85  | 8:1:1 | -4.8  | -6.81  | 2.01 | ACUUGU<br>AUGCUA<br>GCUCAG<br>GUAG           | ATATAAT<br>GGCAAA<br>CCTT | 8 |
| hsa-miR-410     | 136 | 8:1:1 | -7.9  | -10.06 | 2.16 | AGGUUG<br>UCUGUG<br>AUGAGU<br>UCG            | GTTGTAG<br>GT             | 8 |
| hsa-miR-450b-5p | 91  | 8:1:0 | -5.1  | -7.31  | 2.21 | UUUUGC<br>AAUAUG<br>UUCCUG<br>AAUA           | TGGCAA<br>ACCTTTG<br>GTAT | 8 |
| hsa-miR-1290    | 75  | 8:1:1 | -3.4  | -5.62  | 2.22 | UGGAUU<br>UUUGGA<br>UCAGGG<br>A              | AAAATTA<br>TACA           | 8 |
| hsa-miR-153     | 79  | 8:1:1 | -3.5  | -5.74  | 2.24 | UCAUUU<br>UUUGUA<br>UGUUGC<br>AGCU           | TTATACA<br>TATAAT         | 8 |
| hsa-miR-629     | 94  | 8:1:1 | -5.7  | -8.1   | 2.4  | UGGGUU<br>UACGUU<br>GGGAGA<br>ACU            | CAAACC<br>TTTGTA          | 8 |

|                |     |       |       |        |      |                                            |                           |   |
|----------------|-----|-------|-------|--------|------|--------------------------------------------|---------------------------|---|
| hsa-miR-568    | 26  | 8:1:1 | -3    | -5.62  | 2.62 | AUGUAU<br>AAAUGU<br>AUACAC<br>AC<br>GAGGGU | ATATATA<br>TA             | 8 |
| hsa-miR-296-3p | 95  | 8:1:1 | -5.5  | -8.14  | 2.64 | UGGGUG<br>GAGGCU<br>CUCC<br>UCUACA         | AAACCTT<br>TGG            | 8 |
| hsa-miR-1283   | 136 | 8:1:1 | -7.3  | -10.06 | 2.76 | AAGGAA<br>AGCGCU<br>UUCU                   | GTTGTAG<br>GTGA           | 8 |
| hsa-miR-568    | 28  | 8:1:1 | -3.1  | -5.95  | 2.85 | AUGUAU<br>AAAUGU<br>AUACAC<br>AC           | ATATATA<br>TATACAC<br>T   | 8 |
| hsa-miR-512-3p | 39  | 8:1:1 | -4.2  | -7.08  | 2.88 | AAGUGC<br>UGUCAU<br>AGCUGA<br>GGUC         | CACTACT<br>TA             | 8 |
| hsa-miR-655    | 124 | 8:1:0 | -3.15 | -6.04  | 2.89 | AGAGGU<br>UAUCCG<br>UGUUAU<br>GUUC         | TTTATTA<br>CATTGT<br>TGT  | 8 |
| hsa-miR-656    | 65  | 8:1:1 | -2    | -5.07  | 3.07 | AGGUUG<br>CCUGUG<br>AGGUGU<br>UCA          | ATAGCAT<br>AAAAA          | 8 |
| hsa-miR-548n   | 129 | 8:1:0 | -4.5  | -7.6   | 3.1  | CAAAAAG<br>UAAUUG<br>UGGAUU<br>UUGU        | TACATTT<br>GTTGTAG<br>GT  | 8 |
| hsa-miR-656    | 60  | 8:1:0 | -3.1  | -6.21  | 3.11 | AGGUUG<br>CCUGUG<br>AGGUGU<br>UCA          | AAAATAT<br>AGCATA         | 8 |
| hsa-miR-129-5p | 70  | 8:1:1 | -1.72 | -5.28  | 3.56 | CUUUUU<br>GCGGUC<br>UGGGCU<br>UGC          | ATAAAA<br>AAATTA          | 8 |
| hsa-miR-656    | 87  | 8:1:1 | -3.5  | -7.22  | 3.72 | AGGUUG<br>CCUGUG<br>AGGUGU<br>UCA          | ATAATG<br>GCAAAC<br>CTTTG | 8 |
| hsa-miR-491-3p | 55  | 8:1:0 | -2.1  | -6.07  | 3.97 | CUUAUG<br>CAAGAU<br>UCCCUU<br>CUAC         | TGAATAA<br>AATAT          | 8 |
| hsa-miR-380    | 53  | 8:1:1 | -1.6  | -5.67  | 4.07 | UGGUUG<br>ACCAUA<br>GAACAU<br>GCGC         | ATTGAAT<br>AAAA           | 8 |
| hsa-miR-421    | 134 | 8:1:1 | -6.2  | -10.33 | 4.13 | AUCAAC<br>AGACAU<br>UAAUUG<br>GGCGC        | TTGTTGT<br>AGGT           | 8 |
| hsa-miR-545    | 133 | 8:1:1 | -6    | -10.15 | 4.15 | UCAGUA<br>AAUGUU<br>UAUUAG<br>AUGA         | TTTGTG<br>TAGG            | 8 |
| hsa-miR-511    | 112 | 8:1:1 | -2.2  | -6.81  | 4.61 | GUGUCU<br>UUUGCU<br>CUGCAG<br>UCA          | AAAAAT<br>ATTT            | 8 |
| hsa-miR-522    | 115 | 8:1:1 | -2.01 | -6.76  | 4.75 | CUCUAG<br>AGGGAA<br>GCGCUU<br>UCUG         | AATATTT<br>AATTTAT        | 8 |

|                |     |       |       |       |      |                                    |                           |   |  |
|----------------|-----|-------|-------|-------|------|------------------------------------|---------------------------|---|--|
| hsa-miR-142-5p | 122 | 8:1:0 | -2.1  | -6.95 | 4.85 | CAUAAA<br>GUAGAA<br>AGCACU<br>ACU  | AATTTAT<br>TA             | 8 |  |
| hsa-miR-186    | 123 | 8:1:1 | -1.71 | -6.7  | 4.99 | CAAAGA<br>AUUCUC<br>CUUUUG<br>GGCU | ATTTATT<br>ACATTTG<br>TTG | 8 |  |
| hsa-miR-142-5p | 118 | 8:1:1 | -1.6  | -6.73 | 5.13 | CAUAAA<br>GUAGAA<br>AGCACU<br>ACU  | ATTTAAT<br>TTATT          | 8 |  |

Seq ID length Squence  
 5'UTR of 374 CTCATTTATAATTTACAAAATAAATAAAACATAAAAAATAATATATATAATTAATATTTAAATTAAG  
 var GAATACATGAAATATATAATATTTTTTCATAAAATGTAA77G77GTTTTTTTTTTGTTAGAATATTTAAA  
 group B TTTATTAAAAAGTATTAATATATATATTTTTTTTTTAAAAATATATATATAAACTAATAAGTATTATTA  
 TATACATATTTAAATATTATTTTAAATATATATATATATATATTATAATATTACAATTTATAAATTACT  
 ATATATATATAAATATATATAAATACTTATATATATATATTTCAACAAATACAATATTATCATTATTCT  
 ACCATATCACTATACTCCATAA  
 Note: the target sites are shown in italic

Target Prediction:

| microRN A      | Position in UTR | Seed  | dGduplex | dGopen | ddG    | Seq                                 | Target site     | Num of Matches | Mutated seq  | Mutation primers                                                                                                                                              |
|----------------|-----------------|-------|----------|--------|--------|-------------------------------------|-----------------|----------------|--------------|---------------------------------------------------------------------------------------------------------------------------------------------------------------|
| hsa-miR-451    | 105             | 8:1:1 | -6.2     | -7.49  | 1.29   | AAACCG<br>UUACCA<br>UUACUG<br>AGUU  | AATTGTT<br>G    | 8              | GATATG<br>AT | Up:AATA<br>TATAATA<br>TTTTCA<br>TAAAATG<br>TGATATG<br>ATTTTTT<br>TTTTTGT;<br>Down:AA<br>TTTAAAT<br>ATTCTAA<br>CAAAAA<br>AAAAAA<br>ATCATAT<br>CACATTT<br>TATGA |
| hsa-miR-140-5p | 355             | 8:1:1 | -9       | -1.03  | -7.96  | CAGUGG<br>UUUUAC<br>CCUAUG<br>GUAG  | TATCACT<br>A    | 8              |              |                                                                                                                                                               |
| hsa-miR-140-5p | 192             | 8:1:1 | -6       | -15.7  | 9.7    | CAGUGG<br>UUUUAC<br>CCUAUG<br>GUAG  | AACTAAT<br>A    | 8              |              |                                                                                                                                                               |
| hsa-miR-1270   | 356             | 8:1:1 | -16.6    | -1.39  | -15.2  | CUGGAG<br>AUAUGG<br>AAGAGC<br>UGUGU | ATCACTA<br>T    | 8              |              |                                                                                                                                                               |
| hsa-miR-202    | 362             | 8:1:1 | -14.9    | -1.19  | -13.7  | UUCCUA<br>UGCAUA<br>UACUUC<br>UUUG  | ATACTCC<br>CA   | 8              |              |                                                                                                                                                               |
| hsa-miR-206    | 362             | 8:1:1 | -12.6    | -1.19  | -11.4  | UGGAAU<br>GUAAGG<br>AAGUGU<br>GUGG  | ATACTCC<br>CAT  | 8              |              |                                                                                                                                                               |
| hsa-miR-34c-5p | 363             | 8:1:1 | -12.2    | -1.15  | -11.04 | AGGCAG<br>UGUAGU<br>UAGCUG<br>AUUGC | TACTCCC<br>ATAA | 8              |              |                                                                                                                                                               |
| hsa-miR-449a   | 363             | 8:1:1 | -12.2    | -1.15  | -11.04 | UGGCAG<br>UGUAUU<br>GUUAGC<br>UGGU  | TACTCCC<br>ATAA | 8              |              |                                                                                                                                                               |

|                |     |       |        |       |        |                                              |                          |   |
|----------------|-----|-------|--------|-------|--------|----------------------------------------------|--------------------------|---|
| hsa-miR-576-3p | 353 | 8:1:1 | -11.5  | -0.8  | -10.69 | AAGAUG<br>UGGAAA<br>AAUUGG<br>AAUC<br>AGGCAG | CATATCA<br>CTATACT<br>C  | 8 |
| hsa-miR-449b   | 363 | 8:1:1 | -11.4  | -1.15 | -10.24 | UGUAUU<br>GUUAGC<br>UGGC<br>CUGAAG           | TACTCCC<br>ATAA          | 8 |
| hsa-miR-573    | 358 | 8:1:1 | -11.7  | -1.83 | -9.86  | UGAUGU<br>GUAACU<br>GAUCAG<br>CUAGCA         | CACTATA<br>CTCCCAT<br>AA | 8 |
| hsa-miR-585    | 363 | 8:1:0 | -11    | -1.15 | -9.84  | CACAGA<br>UACGCC<br>CAGA<br>GUGGGG           | TACTCCC<br>ATA           | 8 |
| hsa-miR-1275   | 366 | 8:1:1 | -10.3  | -0.94 | -9.35  | GAGAGG<br>CUGUC<br>CUAGUG<br>AGGGAC          | TCCCATA<br>A             | 8 |
| hsa-miR-921    | 356 | 8:1:1 | -10.4  | -1.39 | -9     | AGAACC<br>AGGAUU<br>C<br>UGAUUU              | ATCACTA<br>T             | 8 |
| hsa-miR-190b   | 352 | 8:1:0 | -10.34 | -1.82 | -8.51  | GUUUGA<br>UAUAAU<br>AGGU<br>UGGCAG           | CCATATC<br>ACTATA        | 8 |
| hsa-miR-34a    | 363 | 8:1:1 | -9.22  | -1.15 | -8.06  | UGUCUU<br>AGCUGG<br>UUGU<br>UGGUAG           | TACTCCC<br>ATAA          | 8 |
| hsa-miR-379    | 347 | 8:1:0 | -11.2  | -4.03 | -7.16  | ACUAUG<br>GAACGU<br>AGG<br>UGAUUG            | TTCTACC<br>ATATCAC<br>T  | 8 |
| hsa-miR-508-3p | 361 | 8:1:1 | -8.3   | -1.22 | -7.07  | UAGCCU<br>UUUGGA<br>GUAGA<br>AUGGAG          | TATACTC<br>CCATA         | 8 |
| hsa-miR-620    | 356 | 8:1:1 | -8.1   | -1.39 | -6.7   | AUAGAU<br>AUAGAA<br>AU<br>UGAUUU             | ATCACTA<br>TACTCC        | 8 |
| hsa-miR-190    | 352 | 8:1:0 | -8     | -1.82 | -6.17  | GUUUGA<br>UAUAAU<br>AGGU<br>UGUAGU           | CCATATC<br>ACTATAC<br>TC | 8 |
| hsa-miR-142-3p | 357 | 8:1:1 | -7.72  | -2.1  | -5.61  | GUUUCC<br>UACUUU<br>AUGGA<br>ACAUAC          | TCACTAT<br>ACTCCC<br>ATA | 8 |
| hsa-miR-1      | 362 | 8:1:1 | -6.5   | -1.19 | -5.3   | UUCUUU<br>AUAUGC<br>CCAUC<br>AAGUGA          | ATACTCC<br>CAT           | 8 |
| hsa-miR-1245   | 355 | 8:1:0 | -6.1   | -1.03 | -5.06  | UCUAAA<br>GGCCUA<br>CAU<br>UAUGUG            | TATCACT<br>ATACTCC<br>C  | 8 |
| hsa-miR-299-3p | 351 | 8:1:1 | -7.7   | -2.79 | -4.9   | GGAUGG<br>UAAACC<br>GCUU<br>AAGUGC           | ACCATAT<br>CACTATA<br>CT | 8 |
| hsa-miR-512-3p | 355 | 8:1:1 | -5.5   | -1.03 | -4.46  | UGUCAU<br>AGCUGA<br>GGUC                     | TATCACT<br>ATACT         | 8 |

|                |     |       |       |       |       |                                            |                           |   |
|----------------|-----|-------|-------|-------|-------|--------------------------------------------|---------------------------|---|
| hsa-miR-1272   | 357 | 8:1:1 | -6    | -2.1  | -3.89 | GAUGAU<br>GAUGGC<br>AGCAAA<br>UUCUGA<br>AA | TCACTAT<br>ACTC           | 8 |
| hsa-miR-1206   | 74  | 8:1:0 | -11.8 | -8.46 | -3.33 | UGUUCA<br>UGUAGA<br>UGUUUA<br>AGC          | CATGAA<br>ATATATA<br>A    | 8 |
| hsa-miR-1272   | 338 | 8:0:1 | -9    | -6.26 | -2.73 | GAUGAU<br>GAUGGC<br>AGCAAA<br>UUCUGA<br>AA | TTATCAT<br>TATT           | 8 |
| hsa-miR-1267   | 323 | 8:1:0 | -13.2 | -10.5 | -2.69 | CCUGUU<br>GAAGUG<br>UAAUCC<br>CCA          | TCAACA<br>AATACA<br>ATATT | 8 |
| hsa-miR-517c   | 72  | 8:1:1 | -10.2 | -8.31 | -1.88 | CCUCUA<br>GAUGGA<br>AGCACU<br>GUCU         | TACATGA<br>AATATAT<br>A   | 8 |
| hsa-miR-1258   | 347 | 8:1:1 | -5.9  | -4.03 | -1.86 | AGUUAG<br>GAUUAG<br>GUCGUG<br>GAA          | TTCTACC<br>AT             | 8 |
| hsa-miR-517a   | 72  | 8:1:1 | -10.1 | -8.31 | -1.78 | CCUCUA<br>GAUGGA<br>AGCACU<br>GUCU         | TACATGA<br>AATA           | 8 |
| hsa-miR-1272   | 341 | 8:0:1 | -7.85 | -6.13 | -1.71 | GAUGAU<br>GAUGGC<br>AGCAAA<br>UUCUGA<br>AA | TCATTAT<br>T              | 8 |
| hsa-miR-590-3p | 76  | 8:1:1 | -9.9  | -8.18 | -1.71 | UAAUUU<br>UAUGUA<br>UAAGCU<br>AGU          | TGAAATA<br>TATAATA<br>T   | 8 |
| hsa-miR-502-5p | 64  | 8:1:1 | -6.4  | -4.68 | -1.71 | AUCCUU<br>GCUAUC<br>UGGGUG<br>CUA          | TTAAGG<br>AATACAT         | 8 |
| hsa-miR-203    | 56  | 8:1:1 | -6.1  | -4.52 | -1.57 | AGUGGU<br>UCUUA<br>CAGUUC<br>AACAGU<br>U   | TATTTAA<br>ATTAAG<br>G    | 8 |
| hsa-miR-539    | 89  | 8:1:1 | -9.95 | -8.52 | -1.42 | GGAGAA<br>AUUAUC<br>CUUGGU<br>GUGU         | ATTTTTC<br>ATAA           | 8 |
| hsa-miR-581    | 71  | 8:1:1 | -9.5  | -8.13 | -1.36 | UCUUGU<br>GUUCUC<br>UAGAUC<br>AGU          | ATACATG<br>AAATAT         | 8 |
| hsa-miR-581    | 28  | 8:1:1 | -4.7  | -3.4  | -1.29 | UCUUGU<br>GUUCUC<br>UAGAUC<br>AGU          | ACATAA<br>AAAAAT          | 8 |
| hsa-miR-651    | 346 | 8:1:1 | -6.8  | -5.58 | -1.21 | UUUAGG<br>AUAAGC<br>UUGACU<br>UUUG         | ATTCTAC<br>CA             | 8 |
| hsa-miR-590-3p | 46  | 8:1:0 | -5.4  | -4.3  | -1.09 | UAAUUU<br>UAUGUA<br>UAAGCU<br>AGU          | TATAATT<br>AA             | 8 |

|                 |     |       |       |        |       |                                                         |   |
|-----------------|-----|-------|-------|--------|-------|---------------------------------------------------------|---|
| hsa-miR-548l    | 55  | 8:1:1 | -5.61 | -4.57  | -1.03 | AAAAGU<br>AUUUGC ATATTTA<br>GGUUU AAT<br>UGUC<br>CAUGCC | 8 |
| hsa-miR-532-5p  | 66  | 8:1:1 | -7.3  | -6.35  | -0.94 | UUGAGU AAGGAA<br>GUAGGA TACAT<br>CCGU<br>AGUAAU         | 8 |
| hsa-miR-630     | 68  | 8:1:1 | -8.3  | -7.53  | -0.76 | CUGUAC GGAATA<br>CAGGGA CAT<br>AGGU<br>UAGCAA           | 8 |
| hsa-miR-548p    | 114 | 8:1:1 | -12.7 | -12.41 | -0.28 | AAACUG TTTTTTTT<br>CAGUUA TTG<br>CUUU<br>GAAUGU         | 8 |
| hsa-miR-409-3p  | 333 | 8:1:1 | -6.2  | -5.95  | -0.24 | UGCUCG CAATATT<br>GUGAAC ATC<br>CCCU<br>CUUCUU          | 8 |
| hsa-miR-578     | 73  | 8:1:1 | -8.7  | -8.47  | -0.22 | GUGCUC ACATGA<br>UAGGAU AATAT<br>UGU<br>UAAUCC          | 8 |
| hsa-miR-500     | 66  | 8:1:1 | -6.5  | -6.35  | -0.14 | UUGCUA AAGGAA<br>CCUGGG TACATGA<br>UGAGA A<br>UGACAA    | 8 |
| hsa-miR-549     | 105 | 8:1:1 | -7.4  | -7.49  | 0.09  | CUAUGG AATTGTT<br>AUGAGC GTTTTT<br>UCU<br>AUUCCU        | 8 |
| hsa-miR-384     | 65  | 8:1:1 | -5.5  | -5.65  | 0.15  | AGAAAU TAAGGA<br>UGUUCA ATACATG<br>UA<br>AAAAGU         | 8 |
| hsa-miR-548b-5p | 344 | 8:1:1 | -7    | -7.23  | 0.23  | AAUUGU TTATTCT<br>GGUUUU ACCA<br>GGCC<br>UUAUGG         | 8 |
| hsa-miR-584     | 26  | 8:1:0 | -2.9  | -3.37  | 0.47  | UUUGCC AAACAT<br>UGGGAC AAAAAA<br>UGAG ATAAT            | 8 |
| hsa-miR-548d-5p | 276 | 8:1:0 | -12.5 | -13.1  | 0.6   | AAAAGU TTRACTAT<br>AAUUGU ATATATA<br>GGUUUU T<br>UGCC   | 8 |
| hsa-miR-433     | 340 | 8:1:1 | -5.77 | -6.41  | 0.64  | UACGGU<br>GAGCCU ATCATTA<br>GUCAUU TTC<br>AUUC          | 8 |
| hsa-miR-587     | 65  | 8:1:1 | -5    | -5.65  | 0.65  | UUUCCA<br>UAGGUG TAAGGA<br>AUGAGU ATACAT<br>CAC         | 8 |
| hsa-miR-568     | 43  | 8:1:1 | -3.2  | -4.09  | 0.89  | AUGUAU<br>AAAUGU ATATATA<br>AUACAC ATTTAAAT<br>AC AT    | 8 |
| hsa-miR-548b-5p | 276 | 8:1:0 | -12.2 | -13.1  | 0.9   | AAAAGU TTRACTAT<br>AAUUGU AT<br>GGUUUU<br>GGCC          | 8 |
| hsa-miR-578     | 30  | 8:1:1 | -2.6  | -3.54  | 0.94  | CUUCUU<br>GUGCUC ATAAAA<br>UAGGAU AA<br>UGU             | 8 |

|                  |     |       |       |        |      |                                                |                           |   |
|------------------|-----|-------|-------|--------|------|------------------------------------------------|---------------------------|---|
| hsa-miR-664      | 18  | 8:1:0 | 0     | -1.01  | 1.01 | ACUGGC<br>UAGGGA<br>AAUUGA<br>UUGGAU<br>UAAAUU | AATAAAT<br>A              | 8 |
| hsa-miR-513a-3p  | 135 | 8:1:0 | -7.9  | -8.94  | 1.04 | UCACCU<br>UUCUGA<br>GAAGG<br>UGAUAU            | TAAATTT<br>ATTA           | 8 |
| hsa-miR-190      | 80  | 8:1:1 | -7.9  | -8.94  | 1.04 | GUUUGA<br>UAUUAU<br>AGGU<br>GGCUAG             | ATATATA<br>ATATTTT        | 8 |
| hsa-miR-621      | 123 | 8:1:1 | -11.5 | -12.56 | 1.06 | CAACAG<br>CGCUUA<br>CCU<br>UUUUAUG             | TGTTAGA<br>ATATT          | 8 |
| hsa-miR-137      | 67  | 8:1:0 | -6.3  | -7.36  | 1.06 | CUUAAG<br>AAUACG<br>CGUAG<br>UUAAUG            | AGGAAT<br>ACATGA<br>A     | 8 |
| hsa-miR-155      | 340 | 8:1:0 | -5.3  | -6.41  | 1.11 | CUAAUC<br>GUGUAU<br>GGGGU<br>UCCUUC            | ATCATT<br>TTCTACC         | 8 |
| hsa-miR-205      | 63  | 8:1:0 | -3.6  | -4.71  | 1.11 | AUUCCA<br>CCGGAG<br>UCUG<br>AAGUAG             | ATTAAG<br>GA              | 8 |
| hsa-miR-1244     | 265 | 8:0:1 | -11.1 | -12.33 | 1.23 | UUGGUU<br>UGUAUG<br>AGAUGG<br>UU               | AACTATT<br>ATAATTA<br>C   | 8 |
| hsa-miR-580      | 337 | 8:1:1 | -4    | -5.31  | 1.31 | UAAUGA<br>UUCAUC<br>AGACUC<br>AGAU             | ATTATCA<br>TTATT          | 8 |
| hsa-miR-1322     | 338 | 8:1:1 | -4.9  | -6.26  | 1.36 | GAUGAU<br>GCUGCU<br>GAUGCU<br>G                | TTATCAT<br>TATTCTA<br>C   | 8 |
| hsa-miR-190b     | 41  | 8:1:1 | -3.61 | -5.04  | 1.43 | UGAUAU<br>GUUUGA<br>UAUUGG<br>GUU              | ATATATA<br>TAAT           | 8 |
| hsa-miR-548n     | 88  | 8:1:1 | -6.9  | -8.43  | 1.53 | CAAAAG<br>UAAUUG<br>UGGAUU<br>UUGU             | TATTTTT<br>CATAAA<br>ATG  | 8 |
| hsa-miR-219-2-3p | 343 | 8:1:1 | -5.3  | -6.84  | 1.54 | UGAUUG<br>UCCAAA<br>CGCAAU<br>UCU              | ATTATTC<br>TACCATA<br>TCA | 8 |
| hsa-miR-188-5p   | 66  | 8:1:1 | -4.8  | -6.35  | 1.55 | CAUCCC<br>UUGCAU<br>GGUGGA<br>GGG              | AAGGAA<br>TA              | 8 |
| hsa-miR-569      | 342 | 8:1:1 | -4.6  | -6.16  | 1.56 | AGUUAA<br>UGAAUC<br>CUGGAA<br>AGU              | CATTATT<br>CTACCAT        | 8 |
| hsa-miR-548p     | 120 | 8:0:1 | -11.3 | -12.9  | 1.6  | UAGCAA<br>AAACUG<br>CAGUUA<br>CUUU             | TTTTGTT<br>AGAA           | 8 |
| hsa-miR-876-5p   | 68  | 8:1:1 | -5.8  | -7.53  | 1.73 | UGGAUU<br>UCUUUG<br>UGAAUC<br>ACCA             | GGAATA<br>CATGAA<br>ATATA | 8 |

|                 |     |       |       |        |      |                                                               |   |
|-----------------|-----|-------|-------|--------|------|---------------------------------------------------------------|---|
| hsa-miR-190     | 41  | 8:1:1 | -3.1  | -5.04  | 1.94 | UGAUAU<br>GUUUGA ATATATA<br>UAUAUU TAATTAA                    | 8 |
| hsa-miR-129-5p  | 30  | 8:1:1 | -1.6  | -3.54  | 1.94 | AGGU<br>CUUUUU ATAAAA<br>GCGGUC AAATAAT<br>UGGGCU ATAT<br>UGC | 8 |
| hsa-miR-561     | 53  | 8:1:1 | -2.4  | -4.55  | 2.15 | AUCAAG<br>GAUCUU AAATATT<br>AAACUU TA<br>UGCC                 | 8 |
| hsa-miR-513a-3p | 77  | 8:1:0 | -6.3  | -8.52  | 2.22 | UAAAUU<br>UCACCU GAAATAT<br>UUCUGA ATAATAT<br>GAAGG           | 8 |
| hsa-miR-548l    | 222 | 8:1:1 | -6.01 | -8.24  | 2.23 | AAAAGU<br>AUUUGC ATATTAT<br>GGGUUU TTAT<br>UGUC               | 8 |
| hsa-miR-511     | 26  | 8:1:1 | -1.1  | -3.37  | 2.27 | GUGUCU<br>UUUGCU AAACAT<br>CUGCAG AAAAAA<br>UCA ATAAT         | 8 |
| hsa-miR-297     | 328 | 8:1:0 | -7.3  | -9.6   | 2.3  | AUGUAU<br>GUGUGC AAATAC<br>AUGUGC AATAT<br>AUG                | 8 |
| hsa-miR-374a    | 240 | 8:1:0 | -7.6  | -9.92  | 2.32 | UUUAUA<br>UACAAC TATTATA<br>CUGAUA TATATAT<br>AGUG TA         | 8 |
| hsa-miR-548d-5p | 344 | 8:1:1 | -4.9  | -7.23  | 2.33 | AAAAGU<br>AAUUGU TTATTCT<br>GGUUUU A<br>UGCC                  | 8 |
| hsa-miR-548l    | 87  | 8:0:1 | -6    | -8.34  | 2.34 | AAAAGU<br>AUUUGC ATATTTT<br>GGGUUU TCATA<br>UGUC              | 8 |
| hsa-miR-1259    | 41  | 8:1:1 | -2.7  | -5.04  | 2.34 | UCCCCG<br>AGACCC ATATATA<br>UUUAAC TAATTAA<br>CUGUGA AT       | 8 |
| hsa-miR-656     | 38  | 8:1:0 | -3.7  | -6.07  | 2.37 | AGGUUG<br>CCUGUG ATAATAT<br>AGGUGU ATAT<br>UCA                | 8 |
| hsa-miR-656     | 84  | 8:0:0 | -6    | -8.41  | 2.41 | AGGUUG<br>CCUGUG ATAATAT<br>AGGUGU TT<br>UCA                  | 8 |
| hsa-miR-1278    | 333 | 8:1:1 | -3.5  | -5.95  | 2.45 | UAGUAC<br>UGUGCA CAATATT<br>UAUCA A<br>CUAU                   | 8 |
| hsa-miR-548d-3p | 111 | 8:1:0 | -8.9  | -11.42 | 2.52 | CAAAAA<br>CCACAG TGTTTTT<br>UUUCUU TTTTTTG<br>UUGC            | 8 |
| hsa-miR-653     | 322 | 8:0:0 | -8.2  | -10.85 | 2.65 | GUGUUG<br>AAACAA TTCAACA<br>UCUCUA AATACA<br>CUG AT           | 8 |
| hsa-miR-633     | 47  | 8:1:1 | -1.6  | -4.29  | 2.69 | CUAAUA<br>GUAUCU ATAATTA<br>ACCACA AA<br>AUAAA                | 8 |

|                 |     |       |       |        |      |                                             |                           |   |
|-----------------|-----|-------|-------|--------|------|---------------------------------------------|---------------------------|---|
| hsa-miR-190b    | 80  | 8:1:1 | -6.2  | -8.94  | 2.74 | UGAUAU<br>GUUUGA<br>UAUUGG<br>GUU<br>UGGUUG | ATATATA<br>ATATTTT        | 8 |
| hsa-miR-380     | 241 | 8:0:1 | -7.1  | -9.86  | 2.76 | ACCAUA<br>GAACAU<br>GCGC<br>CUAAUA          | ATTATAT<br>A              | 8 |
| hsa-miR-633     | 337 | 8:1:1 | -2.5  | -5.31  | 2.81 | GUAUCU<br>ACCACA<br>AUAAA<br>CUGGAG         | ATTATCA<br>TT             | 8 |
| hsa-miR-1270    | 320 | 8:1:1 | -8.33 | -11.23 | 2.9  | AUAUGG<br>AAGAGC<br>UGUGU<br>AAAAGU         | ATTTCAA<br>CAAATA<br>C    | 8 |
| hsa-miR-548j    | 276 | 8:1:0 | -10.2 | -13.1  | 2.9  | AAUUGC<br>GGUCUU<br>UGGU<br>CCAGUU          | TACTAT<br>ATAT            | 8 |
| hsa-miR-935     | 103 | 8:1:1 | -6.1  | -9.05  | 2.95 | ACCGCU<br>UCCGCU<br>ACCGC<br>AAAAGU         | GTAATTG<br>TTG            | 8 |
| hsa-miR-548l    | 335 | 8:1:1 | -2.8  | -5.78  | 2.98 | AUUUGC<br>GGUUUU<br>UGUC<br>GAUGAU          | ATATTAT<br>CATTATT<br>CT  | 8 |
| hsa-miR-1322    | 341 | 8:1:1 | -3    | -6.13  | 3.13 | GCUGCU<br>GAUGCU<br>G<br>UGGUUG             | TCATTAT<br>TCTACC         | 8 |
| hsa-miR-380     | 40  | 8:1:1 | -2.3  | -5.45  | 3.15 | ACCAUA<br>GAACAU<br>GCGC<br>AAAAGU          | AATATAT<br>ATAATT         | 8 |
| hsa-miR-548c-5p | 276 | 8:1:0 | -9.9  | -13.1  | 3.2  | AAUUGC<br>GGUUUU<br>UGCC<br>AUGGAG          | TACTAT<br>ATA             | 8 |
| hsa-miR-620     | 320 | 8:1:1 | -8    | -11.23 | 3.23 | AUAGAU<br>AUAGAA<br>AU<br>AAAAGU            | ATTTCAA<br>CAAATA<br>CAAT | 8 |
| hsa-miR-548b-5p | 225 | 8:1:1 | -5.95 | -9.18  | 3.23 | AAUUGC<br>GGUUUU<br>GGCC<br>UGAUAU          | TTATTTA<br>TTAATAT<br>A   | 8 |
| hsa-miR-190     | 293 | 8:1:1 | -10.9 | -14.2  | 3.3  | GUUUGA<br>UAUAUU<br>AGGU<br>UUAUAA          | ATATATA<br>T              | 8 |
| hsa-miR-374a    | 141 | 8:1:0 | -5.29 | -8.59  | 3.3  | UACAAC<br>CUGAUA<br>AGUG<br>UUAUUG          | TATTATA<br>AAAGTAT        | 8 |
| hsa-miR-155     | 150 | 8:1:1 | -9    | -12.32 | 3.32 | CUAAUC<br>GUGAUA<br>GGGGU<br>AAUGGC         | AGTATTA<br>ATAT           | 8 |
| hsa-miR-889     | 334 | 8:1:0 | -2.6  | -5.93  | 3.33 | UGUCCG<br>UAGUAU<br>GGUC<br>UAAUAC          | AATATTA<br>TCATTAT<br>TCT | 8 |
| hsa-miR-429     | 333 | 8:1:0 | -2.6  | -5.95  | 3.35 | UGUCUG<br>GUAAAA<br>CCGU                    | CAATATT<br>ATCATTA<br>TTC | 8 |

|                 |     |       |       |        |      |                                            |                           |   |
|-----------------|-----|-------|-------|--------|------|--------------------------------------------|---------------------------|---|
| hsa-miR-568     | 242 | 8:1:1 | -7    | -10.44 | 3.44 | AUGUAU<br>AAAUGU<br>AUACAC<br>AC<br>UAAUUU | TTATATA<br>TATATTA<br>TA  | 8 |
| hsa-miR-590-3p  | 85  | 8:1:0 | -4.8  | -8.28  | 3.48 | UAUGUA<br>UAAGCU<br>AGU<br>UCCCUG          | TAATATT<br>TTCATA         | 8 |
| hsa-miR-1259    | 51  | 8:1:1 | -0.9  | -4.5   | 3.6  | AGACCC<br>UUUAAC<br>CUGUGA<br>UGGUUG       | TTAAATA<br>TT             | 8 |
| hsa-miR-380     | 84  | 8:1:1 | -4.8  | -8.41  | 3.61 | ACCAUA<br>GAACAU<br>GCGC<br>AAAAGU         | ATAATAT<br>T              | 8 |
| hsa-miR-548a-5p | 225 | 8:1:1 | -5.55 | -9.18  | 3.63 | AAUUGC<br>GAGUUU<br>UACC<br>CUCUAG         | TTATTTA<br>TTAATA         | 8 |
| hsa-miR-522     | 54  | 8:1:1 | -0.9  | -4.57  | 3.67 | AGGGAA<br>GCGCUU<br>UCUG<br>UGACAA         | AATATTT<br>AAATTAA<br>GG  | 8 |
| hsa-miR-549     | 108 | 8:1:1 | -6.1  | -9.81  | 3.71 | CUAUGG<br>AUGAGC<br>UCU<br>UUUGGC          | TGTTGTT<br>TTTTTT         | 8 |
| hsa-miR-1826    | 48  | 8:1:1 | -0.7  | -4.44  | 3.74 | AAUGGU<br>AGAACU<br>CACACU<br>AAAAGU       | TAATTAA<br>AT             | 8 |
| hsa-miR-548h    | 344 | 8:1:1 | -3.4  | -7.23  | 3.83 | AAUCGC<br>GGUUUU<br>UGUC<br>GGCUAC         | TTATTCT<br>ACCAT          | 8 |
| hsa-miR-187     | 71  | 8:1:1 | -4.3  | -8.13  | 3.83 | AACACA<br>GGACCC<br>GGGC<br>UAAUAC         | ATACATG<br>AAA            | 8 |
| hsa-miR-429     | 149 | 8:1:0 | -7.5  | -11.35 | 3.85 | UGUCUG<br>GUAAAA<br>CCGU<br>UAAUUU         | AAGTATT<br>AATA           | 8 |
| hsa-miR-590-3p  | 146 | 8:1:0 | -4.3  | -8.16  | 3.86 | UAUGUA<br>UAAGCU<br>AGU<br>UCGAGG          | TAAAAGT<br>ATTA           | 8 |
| hsa-miR-151-3p  | 345 | 8:1:1 | -3    | -6.87  | 3.87 | AGCUCA<br>CAGUCU<br>AGU<br>UCCCUG          | TATTCTA<br>CCATATC<br>ACT | 8 |
| hsa-miR-1259    | 143 | 8:1:1 | -4.8  | -8.67  | 3.87 | AGACCC<br>UUUAAC<br>CUGUGA<br>UAGCAA       | TTATAAA<br>AGTAT          | 8 |
| hsa-miR-548p    | 115 | 8:1:1 | -8.9  | -12.8  | 3.9  | AAACUG<br>CAGUUA<br>CUUU<br>UCCCUG         | TTTTTTTT<br>TGT           | 8 |
| hsa-miR-1259    | 39  | 8:1:0 | -1.6  | -5.54  | 3.94 | AGACCC<br>UUUAAC<br>CUGUGA<br>UGAUAU       | TAATATA<br>TAT            | 8 |
| hsa-miR-190     | 213 | 8:1:1 | -10.9 | -14.88 | 3.98 | GUUUGA<br>UAUAUU<br>AGGU                   | ACATATT<br>AAA            | 8 |

|                 |     |       |       |        |      |                                              |                           |   |
|-----------------|-----|-------|-------|--------|------|----------------------------------------------|---------------------------|---|
| hsa-miR-548j    | 344 | 8:1:1 | -3.1  | -7.23  | 4.13 | AAAAGU<br>AAUUGC<br>GGUCUU<br>UGGU<br>CUAAUA | TTATTCT<br>ACCATAT<br>CA  | 8 |
| hsa-miR-633     | 142 | 8:1:1 | -4.5  | -8.65  | 4.15 | GUAUCU<br>ACCACA<br>AUA<br>AAA<br>AAAUUA     | ATTATAA<br>AA             | 8 |
| hsa-miR-944     | 86  | 8:1:1 | -4    | -8.17  | 4.17 | UUGUAC<br>AUCGGA<br>UGAG<br>UAGCAA           | AATATTT<br>TTCATAA        | 8 |
| hsa-miR-548p    | 108 | 8:1:1 | -5.5  | -9.81  | 4.31 | AAACUG<br>CAGUUA<br>CUUU<br>UCUUGU           | TGTTGTT<br>TTTTTTTT<br>TG | 8 |
| hsa-miR-581     | 330 | 8:1:1 | -4.5  | -8.82  | 4.32 | GUUCUC<br>UAGAUC<br>AGU<br>AAAAGU            | ATACAAT<br>ATTA           | 8 |
| hsa-miR-548i    | 344 | 8:1:1 | -2.9  | -7.23  | 4.33 | AAUUGC<br>GGAUUU<br>UGCC<br>UCCCUG           | TTATTCT<br>ACCA           | 8 |
| hsa-miR-1259    | 242 | 8:0:1 | -6.1  | -10.44 | 4.34 | AGACCC<br>UUUAAC<br>CUGUGA<br>AUCAAG         | TTATATA<br>TATATTA<br>TAA | 8 |
| hsa-miR-561     | 136 | 8:1:1 | -4.5  | -8.84  | 4.34 | GAUCUU<br>AAACUU<br>UGCC<br>GUGUCU           | AAATTTA<br>TTAT           | 8 |
| hsa-miR-511     | 34  | 8:1:1 | -0.3  | -4.71  | 4.41 | UUUGCU<br>CUGCAG<br>UCA<br>ACUGUU            | AAAAAT<br>AATATAT         | 8 |
| hsa-miR-367     | 101 | 8:1:1 | -6.2  | -10.67 | 4.47 | GCUAAU<br>AUGCAA<br>CUCU<br>ACUUGU           | ATGTAAT<br>TGTTGTT<br>TT  | 8 |
| hsa-miR-643     | 145 | 8:1:1 | -3.56 | -8.09  | 4.53 | AUGCUA<br>GCUCAG<br>GUAG<br>AAUGGA           | ATAAAA<br>GTA             | 8 |
| hsa-miR-1246    | 70  | 8:1:1 | -3.4  | -8.06  | 4.66 | UUUUUG<br>GAGCAG<br>G<br>UAGCAA              | AATACAT<br>GAAAT          | 8 |
| hsa-miR-548p    | 116 | 8:1:1 | -7.9  | -12.69 | 4.79 | AAACUG<br>CAGUUA<br>CUUU<br>AAAAGU           | TTTTTTTT<br>G             | 8 |
| hsa-miR-548j    | 87  | 8:1:1 | -3.54 | -8.34  | 4.8  | AAUUGC<br>GGUCUU<br>UGGU<br>AAAGUG           | ATATTTT<br>T              | 8 |
| hsa-miR-519c-3p | 102 | 8:1:1 | -5.4  | -10.22 | 4.82 | CAUCUU<br>UUUAGA<br>GGAU<br>UGAUAU           | TGTAATT<br>GTTGT          | 8 |
| hsa-miR-190     | 180 | 8:1:1 | -8.29 | -13.12 | 4.83 | GUUUGA<br>UAUAUU<br>AGGU<br>UGGUUG           | ATATATA<br>TATAA          | 8 |
| hsa-miR-380     | 142 | 8:1:1 | -3.8  | -8.65  | 4.85 | ACCAUA<br>GAACAU<br>GCGC                     | ATTATAA<br>A              | 8 |

|                 |     |       |       |        |      |                                              |                          |   |
|-----------------|-----|-------|-------|--------|------|----------------------------------------------|--------------------------|---|
| hsa-miR-651     | 142 | 8:1:1 | -3.8  | -8.65  | 4.85 | UUUAGG<br>AUAAGC<br>UUGACU<br>UUUG           | ATTATAA<br>AAGTATT<br>AA | 8 |
| hsa-miR-374b    | 141 | 8:1:0 | -3.7  | -8.59  | 4.89 | AUAUAA<br>UACAAC<br>CUGCUA<br>AGUG<br>AAAAGU | TATTATA<br>AAAGTAT<br>T  | 8 |
| hsa-miR-548c-5p | 344 | 8:1:1 | -2.3  | -7.23  | 4.93 | AAUUGC<br>GGUUUU<br>UGCC                     | TTATTCT<br>ACCAT         | 8 |
| hsa-miR-548l    | 130 | 8:1:1 | -5.3  | -10.25 | 4.95 | AAAAGU<br>AUUUGC<br>GGGUUU<br>UGUC           | ATATTTA<br>AATTTAT<br>T  | 8 |
| hsa-miR-144     | 250 | 8:1:1 | -8.7  | -13.66 | 4.96 | GGAUAU<br>CAUCAU<br>AUACUG<br>UAAG<br>UGAUAU | ATATTAT<br>AATATTA<br>CA | 8 |
| hsa-miR-190b    | 213 | 8:1:1 | -9.9  | -14.88 | 4.98 | GUUUGA<br>UAUUGG<br>GUU                      | ACATATT<br>AAATATT       | 8 |
| hsa-miR-144     | 239 | 8:1:1 | -5.1  | -10.09 | 4.99 | GGAUAU<br>CAUCAU<br>AUACUG<br>UAAG           | ATATTAT<br>ATATAT        | 8 |
| hsa-miR-218     | 328 | 8:1:1 | -4.6  | -9.6   | 5    | UUGUGC<br>UUGAUC<br>UAACCA<br>UGU            | AAATAC<br>AATATTA<br>TCA | 8 |
| hsa-miR-203     | 131 | 8:1:1 | -5.2  | -10.2  | 5    | AGUGGU<br>UCUUA<br>CAGUUC<br>AACAGU<br>U     | TATTTAA<br>ATTT          | 8 |
| hsa-miR-519a    | 102 | 8:1:1 | -5.22 | -10.22 | 5    | CUCUAG<br>AGGGAA<br>GCGCUU<br>UCUG           | TGTAATT<br>GTTGTTT<br>T  | 8 |
| hsa-miR-548d-5p | 225 | 8:1:1 | -4.15 | -9.18  | 5.03 | AAAAGU<br>AAUUGU<br>GGUUUU<br>UGCC           | TTATTTA<br>TTAATAT       | 8 |
| hsa-miR-548b-5p | 87  | 8:1:1 | -3.3  | -8.34  | 5.04 | AAAAGU<br>AAUUGU<br>GGUUUU<br>GGCC           | ATATTTT<br>TCATAAA       | 8 |
| hsa-miR-548h    | 87  | 8:1:1 | -3.3  | -8.34  | 5.04 | AAAAGU<br>AAUCGC<br>GGUUUU<br>UGUC           | ATATTTT<br>TCA           | 8 |
| hsa-miR-137     | 37  | 8:1:1 | -0.8  | -5.88  | 5.08 | UUUUG<br>CUUAAG<br>AAUACG<br>CGUAG           | AATAATA<br>TAT           | 8 |
| hsa-miR-380     | 260 | 8:1:0 | -7    | -12.2  | 5.2  | UGGUUG<br>ACCAUA<br>GAACAU<br>GCGC           | ATTACAA<br>CTATTAT<br>AA | 8 |
| hsa-miR-491-3p  | 93  | 8:1:0 | -4.66 | -9.9   | 5.24 | CUUAUG<br>CAAGAU<br>UCCCUU<br>CUAC           | TTCATAA<br>AAT           | 8 |
| hsa-miR-548d-5p | 87  | 8:1:1 | -3.1  | -8.34  | 5.24 | AAAAGU<br>AAUUGU<br>GGUUUU<br>UGCC           | ATATTTT<br>TCA           | 8 |

|                 |     |       |       |        |      |                                                            |   |
|-----------------|-----|-------|-------|--------|------|------------------------------------------------------------|---|
| hsa-miR-584     | 37  | 8:1:1 | -0.6  | -5.88  | 5.28 | UUAUGG<br>UUUGCC AATAATA<br>UGGGAC TATAT<br>UGAG<br>CAAAAG | 8 |
| hsa-miR-548n    | 226 | 8:1:1 | -4.4  | -9.73  | 5.33 | UAAUUG TATTTAT<br>UGGAUU T<br>UUGU<br>UAGAUA               | 8 |
| hsa-miR-577     | 224 | 8:1:1 | -3.4  | -8.75  | 5.35 | AAAUAU ATTATTT<br>UGGUAC ATTAA<br>CUG                      | 8 |
| hsa-miR-885-5p  | 103 | 8:1:0 | -3.7  | -9.05  | 5.35 | UCCAUU GTAATTG<br>ACACUA TTGTTTT<br>CCCUGC TT<br>CUCU      | 8 |
| hsa-miR-559     | 140 | 8:1:1 | -3.1  | -8.46  | 5.36 | UAAAGU<br>AAAUAU TTATTAT<br>GCACCA AAAAG<br>AAA<br>CACUAG  | 8 |
| hsa-miR-28-3p   | 138 | 8:1:1 | -2.79 | -8.16  | 5.37 | AUUGUG ATTTATT<br>AGCUCC ATA<br>UGGA<br>AAAAGU             | 8 |
| hsa-miR-548a-5p | 276 | 8:1:0 | -7.7  | -13.1  | 5.4  | AAUUGC TTRACTAT<br>GAGUUU ATAT<br>UACC<br>UAGCAA           | 8 |
| hsa-miR-548p    | 117 | 8:1:1 | -7.2  | -12.64 | 5.44 | AAACUG TTTTTTT<br>CAGUUA GTT<br>CUUU<br>UGGUUG             | 8 |
| hsa-miR-380     | 224 | 8:1:1 | -3.3  | -8.75  | 5.45 | ACCAUA ATTATTT<br>GAACAU ATT<br>GCGC<br>CUAAUA             | 8 |
| hsa-miR-633     | 224 | 8:1:1 | -3.3  | -8.75  | 5.45 | GUAUCU ATTATTT<br>ACCACA ATTAATA<br>AUAAA<br>AAUAAU        | 8 |
| hsa-miR-369-3p  | 239 | 8:1:0 | -4.6  | -10.09 | 5.49 | ACAUGG ATATTAT<br>UUGAUC ATAT<br>UUU<br>AGUGGU             | 8 |
| hsa-miR-203     | 319 | 8:0:1 | -6.6  | -12.1  | 5.5  | UCUUA TATTTCA<br>CAGUUC AC<br>AACAGU<br>U                  | 8 |
| hsa-miR-590-3p  | 189 | 8:1:0 | -8    | -13.54 | 5.54 | UAAUUU TAAAACT<br>UAUGUA AATAAGT<br>UAAGCU ATT<br>AGU      | 8 |
| hsa-miR-590-3p  | 97  | 8:1:0 | -5.4  | -10.94 | 5.54 | UAAUUU TAAAAATG<br>UAUGUA TAATT<br>UAAGCU<br>AGU           | 8 |
| hsa-miR-568     | 285 | 8:1:1 | -5.9  | -11.5  | 5.6  | AUGUAU ATATATA<br>AAAUGU AATATAT<br>AUACAC ATA<br>AC       | 8 |
| hsa-miR-450b-5p | 143 | 8:1:1 | -3    | -8.67  | 5.67 | UUUUGC TTATAAA<br>AAUAUG AGTATTA<br>UCCUG A<br>AAUA        | 8 |

|                 |     |       |       |        |      |                                           |                           |   |
|-----------------|-----|-------|-------|--------|------|-------------------------------------------|---------------------------|---|
| hsa-miR-203     | 90  | 8:1:1 | -2.8  | -8.48  | 5.68 | AGUGGU<br>UCUUAA<br>CAGUUC<br>AACAGU<br>U | TTTTTCA<br>TAAA           | 8 |
| hsa-miR-548h    | 276 | 8:1:0 | -7.4  | -13.1  | 5.7  | AAAAGU<br>AAUCGC<br>GGUUUU<br>UGUC        | TTACTAT<br>AT             | 8 |
| hsa-miR-633     | 340 | 8:1:1 | -0.7  | -6.41  | 5.71 | CUAAUA<br>GUAUCU<br>ACCACA<br>AUAAA       | ATCATT<br>TTCTAC          | 8 |
| hsa-miR-494     | 89  | 8:1:0 | -2.8  | -8.52  | 5.72 | AGGUUG<br>UCCGUG<br>UUGUCU<br>UCUCU       | ATTTTT<br>ATAAAAT<br>GT   | 8 |
| hsa-miR-548i    | 225 | 8:1:1 | -3.4  | -9.18  | 5.78 | AAAAGU<br>AAUUGC<br>GGUUUU<br>UGCC        | TTATTT<br>TTA             | 8 |
| hsa-miR-429     | 223 | 8:1:1 | -2.8  | -8.62  | 5.82 | UAAUAC<br>UGUCUG<br>GUAAAA<br>CCGU        | TATTATT<br>TATTA          | 8 |
| hsa-miR-628-5p  | 124 | 8:1:1 | -6.2  | -12.03 | 5.83 | AUGCUG<br>ACAUAU<br>UUACUA<br>GAGG        | GTTAGA<br>ATATTT<br>AATT  | 8 |
| hsa-miR-221     | 101 | 8:1:1 | -4.8  | -10.67 | 5.87 | ACCUGG<br>CAUACA<br>AUGUAG<br>AUUU        | ATGTAAT<br>TGTTGTT        | 8 |
| hsa-miR-190     | 235 | 8:1:1 | -5.82 | -11.7  | 5.88 | UGAUAU<br>GUUUGA<br>UAUAUU<br>AGGU        | ATATATA<br>TT             | 8 |
| hsa-miR-548g    | 163 | 8:1:1 | -5.8  | -11.69 | 5.89 | UGCAAA<br>AGUAAU<br>UGCAGU<br>UUUUG       | ATATTTT<br>TTTT           | 8 |
| hsa-miR-548j    | 225 | 8:1:1 | -3.25 | -9.18  | 5.93 | AAAAGU<br>AAUUGC<br>GGUCUU<br>UGGU        | TTATTT<br>TTAATAT<br>ATA  | 8 |
| hsa-miR-144     | 163 | 8:1:1 | -5.7  | -11.69 | 5.99 | GGAUAU<br>CAUCAU<br>AUACUG<br>UAAG        | ATATTTT<br>TTTTTT<br>AA   | 8 |
| hsa-miR-1179    | 128 | 8:1:1 | -5    | -11.03 | 6.03 | AAGCAU<br>UCUUUC<br>AUUGGU<br>UGG         | GAATATT<br>TAAATTT        | 8 |
| hsa-miR-1259    | 80  | 8:1:1 | -2.9  | -8.94  | 6.04 | UCCUG<br>AGACCC<br>UUUAAC<br>CUGUGA       | ATATATA<br>ATATTTT<br>TC  | 8 |
| hsa-miR-519b-3p | 102 | 8:1:1 | -4.1  | -10.22 | 6.12 | AAAGUG<br>CAUCCU<br>UUUAGA<br>GGUU        | TGTAATT<br>GT             | 8 |
| hsa-miR-374b    | 240 | 8:1:0 | -3.79 | -9.92  | 6.13 | AUAUAA<br>UACAAC<br>CUGCUA<br>AGUG        | TATTATA<br>TATATAT<br>TAT | 8 |
| hsa-miR-302f    | 102 | 8:1:1 | -4.09 | -10.22 | 6.13 | UAAUUG<br>CUUCCA<br>UGUUU                 | TGTAATT<br>GTT            | 8 |

|                 |     |       |       |        |      |                                            |                           |   |
|-----------------|-----|-------|-------|--------|------|--------------------------------------------|---------------------------|---|
| hsa-miR-548c-5p | 87  | 8:1:1 | -2.2  | -8.34  | 6.14 | AAAAGU<br>AAUUGC<br>GGUUUU<br>UGCC         | ATATTTT<br>TCATA          | 8 |
| hsa-miR-369-3p  | 140 | 8:1:0 | -2.3  | -8.46  | 6.16 | AAUAAU<br>ACAUGG<br>UUGAUC<br>UUU          | TTATTAT<br>AAAA           | 8 |
| hsa-miR-186     | 138 | 8:1:1 | -2    | -8.16  | 6.16 | CAAAGA<br>AUUCUC<br>CUUUUG<br>GGCU         | ATTTATT<br>AT             | 8 |
| hsa-miR-633     | 266 | 8:1:0 | -5.5  | -11.69 | 6.19 | CUAAUA<br>GUAUCU<br>ACCACA<br>AUAAA        | ACTATTA<br>TAA            | 8 |
| hsa-miR-548a-5p | 344 | 8:1:1 | -1    | -7.23  | 6.23 | AAAAGU<br>AAUUGC<br>GAGUUU<br>UACC         | TTATTCT<br>ACCATAT<br>CA  | 8 |
| hsa-miR-1272    | 270 | 8:1:1 | -5    | -11.27 | 6.27 | GAUGAU<br>GAUGGC<br>AGCAAA<br>UUCUGA<br>AA | TTATAAT<br>T              | 8 |
| hsa-miR-548i    | 276 | 8:1:0 | -6.8  | -13.1  | 6.3  | AAAAGU<br>AAUUGC<br>GGUUUU<br>UGCC         | TTACTAT<br>ATATATA<br>TA  | 8 |
| hsa-miR-600     | 122 | 8:1:1 | -6.8  | -13.12 | 6.32 | ACUUAC<br>AGACAA<br>GAGCCU<br>UGCUC        | TTGTTAG<br>AATA           | 8 |
| hsa-miR-802     | 111 | 8:1:1 | -5.1  | -11.42 | 6.32 | CAGUAA<br>CAAAGA<br>UUCAUC<br>CUUGU        | TGTTTTT<br>TTTTT          | 8 |
| hsa-miR-548a-5p | 87  | 8:1:1 | -2.02 | -8.34  | 6.32 | AAAAGU<br>AAUUGC<br>GAGUUU<br>UACC         | ATATTTT<br>TCATAAA<br>ATG | 8 |
| hsa-miR-656     | 332 | 8:1:0 | -0.7  | -7.1   | 6.4  | AGGUUG<br>CCUGUG<br>AGGUGU<br>UCA          | ACAATAT<br>TATCATT<br>ATT | 8 |
| hsa-miR-33a     | 99  | 8:1:1 | -4.5  | -10.92 | 6.42 | GUGCAU<br>UGUAGU<br>UGCAUU<br>GCA          | AAATGTA<br>ATTGTTG<br>TT  | 8 |
| hsa-miR-548k    | 87  | 8:1:1 | -1.92 | -8.34  | 6.42 | AAAAGU<br>ACUUGC<br>GGUUUU<br>UGCU         | ATATTTT<br>TCATA          | 8 |
| hsa-miR-548i    | 87  | 8:1:1 | -1.92 | -8.34  | 6.42 | AAAAGU<br>AAUUGC<br>GGUUUU<br>UGCC         | ATATTTT<br>TCATAAA<br>ATG | 8 |
| hsa-miR-374a    | 268 | 8:1:0 | -4.4  | -10.85 | 6.45 | UUAUAA<br>UACAAC<br>CUGAUA<br>AGUG         | TATTATA<br>ATTACTA        | 8 |
| hsa-miR-514     | 151 | 8:1:1 | -6.6  | -13.06 | 6.46 | UACUCU<br>GGAGAG<br>UGACAA<br>UCAUG        | GTATTAA<br>TA             | 8 |
| hsa-miR-190b    | 293 | 8:1:1 | -7.7  | -14.2  | 6.5  | UGAUAU<br>GUUUGA<br>UAUUGG<br>GUU          | ATATATA<br>TATAAT         | 8 |

|                 |     |       |       |        |      |                                              |                          |   |
|-----------------|-----|-------|-------|--------|------|----------------------------------------------|--------------------------|---|
| hsa-miR-656     | 77  | 8:1:1 | -2    | -8.52  | 6.52 | AGGUUG<br>CCUGUG<br>AGGUGU<br>UCA<br>CAAAAA  | GAAATAT<br>ATA           | 8 |
| hsa-miR-548d-3p | 112 | 8:1:0 | -5    | -11.54 | 6.54 | CCACAG<br>UUUCUU<br>UUGC<br>UGAUAU           | GTTTTTT<br>TTT           | 8 |
| hsa-miR-190b    | 235 | 8:1:1 | -5.1  | -11.7  | 6.6  | GUUUGA<br>UAUUGG<br>GUU<br>AUGUAU            | ATATATA<br>TTATAT        | 8 |
| hsa-miR-568     | 244 | 8:1:1 | -5.1  | -11.73 | 6.63 | AAAUGU<br>AUACAC<br>AC                       | ATATATA<br>TATTA         | 8 |
| hsa-miR-495     | 112 | 8:1:0 | -4.9  | -11.54 | 6.64 | GAAGUU<br>GCCCAU<br>GUUAUU<br>UUCG           | GTTTTTT<br>TTTTTGT<br>T  | 8 |
| hsa-miR-655     | 139 | 8:1:0 | -1.3  | -7.97  | 6.67 | AGAGGU<br>UAUCCG<br>UGUUAU<br>GUUC           | TTTATTA<br>TAAAAGT<br>AT | 8 |
| hsa-miR-496     | 303 | 8:0:1 | -7.5  | -14.18 | 6.68 | UGAGUA<br>UUACAU<br>GGCCAA<br>UCUC<br>CUCUAG | AATACTT<br>A             | 8 |
| hsa-miR-522     | 266 | 8:1:1 | -5    | -11.69 | 6.69 | AGGGAA<br>GCGCUU<br>UCUG                     | ACTATTA<br>TAA           | 8 |
| hsa-miR-499-5p  | 150 | 8:1:0 | -5.6  | -12.32 | 6.72 | UUAAGA<br>CUUGCA<br>GUGAUG<br>UUU            | AGTATTA<br>ATATATA<br>T  | 8 |
| hsa-miR-548h    | 225 | 8:1:1 | -2.43 | -9.18  | 6.75 | AAAAGU<br>AAUCGC<br>GGUUUU<br>UGUC<br>CAAGUC | TTATTTA<br>T             | 8 |
| hsa-miR-1264    | 86  | 8:1:1 | -1.4  | -8.17  | 6.77 | UUUUUU<br>GAGCAC<br>CUGUU                    | AATATTT<br>TT            | 8 |
| hsa-miR-548c-5p | 225 | 8:1:1 | -2.4  | -9.18  | 6.78 | AAAAGU<br>AAUUGC<br>GGUUUU<br>UGCC<br>UGAUAU | TTATTTA<br>TTAATA        | 8 |
| hsa-miR-190b    | 157 | 8:1:1 | -6.7  | -13.48 | 6.78 | GUUUGA<br>UAUUGG<br>GUU                      | ATATATA<br>TATTTTT<br>T  | 8 |
| hsa-miR-1259    | 207 | 8:0:1 | -8.7  | -15.54 | 6.84 | UCCCUG<br>AGACCC<br>UUUAAC<br>CUGUGA         | TTATATA<br>CATATT        | 8 |
| hsa-miR-655     | 228 | 8:1:0 | -3.2  | -10.06 | 6.86 | AGAGGU<br>UAUCCG<br>UGUUAU<br>GUUC           | TTTATTA<br>ATATAT        | 8 |
| hsa-miR-380     | 217 | 8:1:0 | -6    | -12.93 | 6.93 | UGGUUG<br>ACCAUA<br>GAACAU<br>GCGC           | ATTAAAT<br>ATT           | 8 |
| hsa-miR-576-5p  | 124 | 8:1:1 | -5.1  | -12.03 | 6.93 | AUUCUA<br>AUUUCU<br>CCACGU<br>CUUU           | GTTAGA<br>ATAT           | 8 |

|              |     |       |      |        |      |                                      |                           |   |
|--------------|-----|-------|------|--------|------|--------------------------------------|---------------------------|---|
| hsa-miR-1278 | 149 | 8:1:1 | -4.4 | -11.35 | 6.95 | UAGUAC<br>UGUGCA<br>UAUCAU<br>CUAU   | AAGTATT<br>AATA           | 8 |
| hsa-miR-380  | 252 | 8:1:1 | -6.2 | -13.17 | 6.97 | UGGUUG<br>ACCAUA<br>GAACAU<br>GCGC   | ATTATAA<br>TATTACA<br>AC  | 8 |
| hsa-miR-25   | 101 | 8:1:1 | -3.7 | -10.67 | 6.97 | AGGCGG<br>AGACUU<br>GGGCAA<br>UUG    | ATGTAAT<br>TGTTGTT<br>TT  | 8 |
| hsa-miR-1259 | 225 | 8:1:1 | -2.2 | -9.18  | 6.98 | UCCCUG<br>AGACCC<br>UUUAAC<br>CUGUGA | TTATTTA<br>TTAAT          | 8 |
| hsa-miR-944  | 271 | 8:1:1 | -3.9 | -10.93 | 7.03 | AAAUUA<br>UUGUAC<br>AUCGGA<br>UGAG   | TATAATT<br>ACTATA         | 8 |
| hsa-miR-92a  | 101 | 8:1:1 | -3.6 | -10.67 | 7.07 | UAUUGC<br>ACUUGU<br>CCCGGC<br>CUGU   | ATGTAAT<br>TGTTGT         | 8 |
| hsa-miR-92b  | 101 | 8:1:1 | -3.6 | -10.67 | 7.07 | AGGGAC<br>GGGACG<br>CGGUGC<br>AGUG   | ATGTAAT<br>TGTTG          | 8 |
| hsa-miR-410  | 109 | 8:1:1 | -3.7 | -10.78 | 7.08 | AGGUUG<br>UCUGUG<br>AUGAGU<br>UCG    | GTTGTTT<br>TTT            | 8 |
| hsa-miR-380  | 269 | 8:1:1 | -3.7 | -10.79 | 7.09 | UGGUUG<br>ACCAUA<br>GAACAU<br>GCGC   | ATTATAA<br>TTRACTAT<br>A  | 8 |
| hsa-miR-655  | 150 | 8:1:0 | -5.2 | -12.32 | 7.12 | AGAGGU<br>UAUCCG<br>UGUUAU<br>GUUC   | AGTATTA<br>ATATATA<br>T   | 8 |
| hsa-miR-1246 | 79  | 8:1:1 | -1.7 | -8.85  | 7.15 | AAUGGA<br>UUUUUG<br>GAGCAG<br>G      | AATATAT<br>AATA           | 8 |
| hsa-miR-374b | 268 | 8:1:0 | -3.6 | -10.85 | 7.25 | AUAUAA<br>UACAAC<br>CUGCUA<br>AGUG   | TATTATA<br>ATTACT         | 8 |
| hsa-miR-568  | 209 | 8:1:0 | -7.6 | -14.94 | 7.34 | AUGUAU<br>AAAUGU<br>AUACAC<br>AC     | ATATACA<br>TATTA<br>TAT   | 8 |
| hsa-miR-539  | 138 | 8:1:1 | -0.8 | -8.16  | 7.36 | GGAGAA<br>AUUAUC<br>CUUGGU<br>GUGU   | ATTTATT<br>A              | 8 |
| hsa-miR-190  | 157 | 8:1:1 | -6.1 | -13.48 | 7.38 | UGAUAU<br>GUUUGA<br>UAUAUU<br>AGGU   | ATATATA<br>TATT           | 8 |
| hsa-miR-568  | 308 | 8:1:1 | -5.8 | -13.22 | 7.42 | AUGUAU<br>AAAUGU<br>AUACAC<br>AC     | TTATATA<br>TATA           | 8 |
| hsa-miR-410  | 241 | 8:1:0 | -2.4 | -9.86  | 7.46 | AGGUUG<br>UCUGUG<br>AUGAGU<br>UCG    | ATTATAT<br>ATATATT<br>ATA | 8 |

|                 |     |       |       |        |      |                                             |                           |   |
|-----------------|-----|-------|-------|--------|------|---------------------------------------------|---------------------------|---|
| hsa-miR-577     | 167 | 8:1:1 | -4.3  | -11.86 | 7.56 | UAGUAU<br>AAAUAU<br>UGGUAC<br>CUG<br>AUGUAU | TTTTTTTT<br>TAAAAAT<br>AT | 8 |
| hsa-miR-568     | 283 | 8:1:1 | -3.9  | -11.47 | 7.57 | AAAUGU<br>AUACAC<br>AC<br>CAAAAA            | ATATATA<br>TAAA           | 8 |
| hsa-miR-548c-3p | 164 | 8:1:0 | -3.83 | -11.44 | 7.61 | UCUCAA<br>UUACUU<br>UUGC<br>AUGUAU          | TATTTTTT<br>T             | 8 |
| hsa-miR-568     | 310 | 8:1:1 | -5.5  | -13.24 | 7.74 | AAAUGU<br>AUACAC<br>AC<br>CAAAGG            | ATATATA<br>TATAT          | 8 |
| hsa-miR-548m    | 305 | 8:1:1 | -6.6  | -14.34 | 7.74 | UAUUUG<br>UGGUUU<br>UUG<br>UGUAU            | TACTTAT<br>ATATAT         | 8 |
| hsa-miR-190b    | 180 | 8:1:1 | -5.37 | -13.12 | 7.75 | GUUUGA<br>UAUUGG<br>GUU<br>UAAAGU           | ATATATA<br>T              | 8 |
| hsa-miR-559     | 163 | 8:1:1 | -3.9  | -11.69 | 7.79 | AAAUAU<br>GCACCA<br>AAA<br>AUGUAU           | ATATTTT<br>TT             | 8 |
| hsa-miR-568     | 159 | 8:1:1 | -5.7  | -13.52 | 7.82 | AAAUGU<br>AUACAC<br>AC<br>CAAAAG            | ATATATA<br>TTT            | 8 |
| hsa-miR-548n    | 164 | 8:1:1 | -3.6  | -11.44 | 7.84 | UAUUUG<br>UGGAUU<br>UUGU<br>AUCAAG          | TATTTTTT<br>TTTTAAA       | 8 |
| hsa-miR-561     | 220 | 8:1:1 | -2.4  | -10.26 | 7.86 | GAUCUU<br>AAACUU<br>UGCC<br>AUGUAU          | AAATATT<br>ATT            | 8 |
| hsa-miR-568     | 184 | 8:1:1 | -4.9  | -12.81 | 7.91 | AAAUGU<br>AUACAC<br>AC<br>AGGUUG            | ATATATA<br>AA             | 8 |
| hsa-miR-656     | 127 | 8:1:0 | -2.1  | -10.13 | 8.03 | CCUGUG<br>AGGUGU<br>UCA<br>AGAGGU           | AGAATAT<br>TTAAATT<br>TA  | 8 |
| hsa-miR-655     | 238 | 8:1:0 | -2.7  | -10.74 | 8.04 | UAUCCG<br>UGUUU<br>GUUC<br>UAGUAU           | TATATTA<br>TATATAT<br>A   | 8 |
| hsa-miR-577     | 169 | 8:1:1 | -4.4  | -12.49 | 8.09 | AAAUAU<br>UGGUAC<br>CUG<br>CAAAAA           | TTTTTTTA                  | 8 |
| hsa-miR-548c-3p | 88  | 8:1:0 | -0.3  | -8.43  | 8.13 | UCUCAA<br>UUACUU<br>UUGC<br>UAAUAC          | TATTTTT<br>CATA           | 8 |
| hsa-miR-429     | 85  | 8:1:1 | -0.1  | -8.28  | 8.18 | UGUCUG<br>GUAAAA<br>CCGU<br>UAGUAU          | TAATATT<br>TT             | 8 |
| hsa-miR-577     | 168 | 8:1:1 | -3.91 | -12.17 | 8.26 | AAAUAU<br>UGGUAC<br>CUG                     | TTTTTTTT<br>AAAAAT<br>A   | 8 |

|                 |     |       |       |        |      |                                              |                           |   |
|-----------------|-----|-------|-------|--------|------|----------------------------------------------|---------------------------|---|
| hsa-miR-568     | 314 | 8:1:1 | -5.8  | -14.16 | 8.36 | AUGUAU<br>AAAUGU<br>AUACAC<br>AC<br>AGGUUG   | ATATATA<br>TTTCAAC<br>A   | 8 |
| hsa-miR-656     | 255 | 8:0:0 | -4.1  | -12.53 | 8.43 | CCUGUG<br>AGGUGU<br>UCA<br>UCCCUG            | ATAATAT<br>TACAAC         | 8 |
| hsa-miR-1259    | 157 | 8:1:1 | -5    | -13.48 | 8.48 | AGACCC<br>UUUAAC<br>CUGUGA<br>CUAAUA         | ATATATA<br>T              | 8 |
| hsa-miR-633     | 269 | 8:1:1 | -2.3  | -10.79 | 8.49 | GUAUCU<br>ACCACA<br>AUAAA<br>AGGUUG          | ATTATAA<br>T              | 8 |
| hsa-miR-656     | 239 | 8:1:0 | -1.6  | -10.09 | 8.49 | CCUGUG<br>AGGUGU<br>UCA                      | ATATTAT<br>ATATA          | 8 |
| hsa-miR-548a-5p | 204 | 8:1:1 | -7.5  | -16.03 | 8.53 | AAAAGU<br>AAUUGC<br>GAGUUU<br>UACC<br>AAUGGA | TTATTAT<br>ATACATA<br>TTA | 8 |
| hsa-miR-1246    | 179 | 8:1:1 | -5.1  | -13.63 | 8.53 | UUUUUG<br>GAGCAG<br>G                        | AATATAT<br>ATATAA         | 8 |
| hsa-miR-630     | 301 | 8:1:1 | -5.1  | -13.67 | 8.57 | AGUAUU<br>CUGUAC<br>CAGGGA<br>AGGU           | ATAATAC<br>T              | 8 |
| hsa-miR-548b-5p | 204 | 8:1:1 | -7.4  | -16.03 | 8.63 | AAAAGU<br>AAUUGU<br>GGUUUU<br>GGCC<br>CUAGGU | TTATTAT<br>ATACATA<br>T   | 8 |
| hsa-miR-331-5p  | 304 | 8:1:1 | -5.2  | -13.88 | 8.68 | AUGGUC<br>CCAGGG<br>AUCC                     | ATACTTA<br>TATATAT        | 8 |
| hsa-miR-495     | 120 | 8:1:0 | -4.22 | -12.9  | 8.68 | GAAGUU<br>GCCCAU<br>GUUAUU<br>UUCG<br>UCCCUG | TTTTGTT<br>AGAATAT<br>TT  | 8 |
| hsa-miR-1259    | 235 | 8:1:1 | -3    | -11.7  | 8.7  | AGACCC<br>UUUAAC<br>CUGUGA<br>UGGAUU         | ATATATA<br>TTATAT         | 8 |
| hsa-miR-1290    | 177 | 8:1:1 | -5    | -13.7  | 8.7  | UUUGGA<br>UCAGGG<br>A                        | AAAATAT<br>ATATATA<br>AAA | 8 |
| hsa-miR-568     | 281 | 8:1:1 | -3.9  | -12.63 | 8.73 | AUGUAU<br>AAAUGU<br>AUACAC<br>AC<br>UGCAAA   | ATATATA<br>TATAAAT<br>A   | 8 |
| hsa-miR-548f    | 88  | 8:1:1 | 0.3   | -8.43  | 8.73 | AGUAUU<br>CACAGU<br>UUUU<br>CAAAGA           | TATTTTT<br>CA             | 8 |
| hsa-miR-186     | 87  | 8:1:1 | 0.41  | -8.34  | 8.75 | AUUCUC<br>CUUUUG<br>GGCU<br>CAUAAA           | ATATTTT<br>TCATAAA<br>AT  | 8 |
| hsa-miR-142-5p  | 239 | 8:1:1 | -1.3  | -10.09 | 8.79 | GUAGAA<br>AGCACU<br>ACU                      | ATATTAT<br>AT             | 8 |

|                |     |       |       |        |      |                                               |                           |   |
|----------------|-----|-------|-------|--------|------|-----------------------------------------------|---------------------------|---|
| hsa-miR-137    | 150 | 8:1:1 | -3.5  | -12.32 | 8.82 | UUUUUG<br>CUUAAG<br>AAUACG<br>CGUAG<br>CAUAAA | AGTATTA<br>ATAT           | 8 |
| hsa-miR-142-5p | 241 | 8:1:1 | -1    | -9.86  | 8.86 | GUAGAA<br>AGCACU<br>ACU<br>UAAAGU             | ATTATAT<br>ATATATT<br>AT  | 8 |
| hsa-miR-559    | 167 | 8:1:1 | -3    | -11.86 | 8.86 | AAAUAU<br>GCACCA<br>AAA<br>AAAAGU             | TTTTTTTT<br>TAA           | 8 |
| hsa-miR-548l   | 304 | 8:1:0 | -4.89 | -13.88 | 8.99 | AUUUGC<br>GGUUU<br>UGUC                       | ATACTTA<br>TAT            | 8 |
| hsa-miR-568    | 297 | 8:1:1 | -4.9  | -13.94 | 9.04 | AUGUAU<br>AAAUGU<br>AUACAC<br>AC<br>CAAAGA    | ATATATA<br>ATACTTA<br>TA  | 8 |
| hsa-miR-186    | 165 | 8:1:1 | -2.4  | -11.44 | 9.04 | AUUCUC<br>CUUUUG<br>GGCU<br>UAAAGU            | ATTTTTTT<br>T             | 8 |
| hsa-miR-559    | 117 | 8:1:1 | -3.6  | -12.64 | 9.04 | AAAUAU<br>GCACCA<br>AAA<br>AGGUUG             | TTTTTTT<br>GTTAG          | 8 |
| hsa-miR-656    | 241 | 8:1:0 | -0.8  | -9.86  | 9.06 | CCUGUG<br>AGGUGU<br>UCA<br>UUUAGG             | ATTATAT<br>ATA            | 8 |
| hsa-miR-651    | 269 | 8:1:1 | -1.7  | -10.79 | 9.09 | AUAAGC<br>UUGACU<br>UUUG<br>UGAGUA            | ATTATAA<br>TTA            | 8 |
| hsa-miR-496    | 257 | 8:1:1 | -3.4  | -12.5  | 9.1  | UUACAU<br>GGCCAA<br>UCUC                      | AATATTA<br>CAACTAT<br>T   | 8 |
| hsa-miR-568    | 233 | 8:1:1 | -3.3  | -12.42 | 9.12 | AUGUAU<br>AAAUGU<br>AUACAC<br>AC              | TAATATA<br>TATTATA<br>TA  | 8 |
| hsa-miR-548f   | 164 | 8:1:1 | -2.3  | -11.44 | 9.14 | UGCAA<br>AGUAAU<br>CACAGU<br>UUUU<br>UUAUCA   | TATTTTTT<br>TTTTAAA<br>AA | 8 |
| hsa-miR-361-5p | 92  | 8:1:1 | -0.45 | -9.6   | 9.15 | GAAUCU<br>CCAGGG<br>GUAC                      | TTTCATA<br>AAAT           | 8 |
| hsa-miR-1278   | 302 | 8:1:1 | -4.6  | -13.81 | 9.21 | UAGUAC<br>UGUGCA<br>UAUCAU<br>CUAU            | TAATACT<br>TATATAT<br>ATA | 8 |
| hsa-miR-548n   | 114 | 8:1:1 | -3.2  | -12.41 | 9.21 | CAAAAG<br>UAAUUG<br>UGGAUU<br>UUGU<br>UUAUAA  | TTTTTTTT<br>TTG           | 8 |
| hsa-miR-374a   | 251 | 8:1:0 | -4.2  | -13.55 | 9.35 | UACAAC<br>CUGAUA<br>AGUG<br>AUGUAU            | TATTATA<br>ATAT           | 8 |
| hsa-miR-568    | 246 | 8:1:1 | -4.4  | -13.77 | 9.37 | AAAUGU<br>AUACAC<br>AC                        | ATATATA<br>T              | 8 |

|                 |     |       |       |        |      |                                     |                           |   |
|-----------------|-----|-------|-------|--------|------|-------------------------------------|---------------------------|---|
| hsa-miR-577     | 114 | 8:1:1 | -3    | -12.41 | 9.41 | UAGAUA<br>AAAUAU<br>UGGUAC<br>CUG   | TTTTTTTT<br>TTGTTA        | 8 |
| hsa-miR-548l    | 163 | 8:1:1 | -2.26 | -11.69 | 9.43 | AAAAGU<br>AUUUGC<br>GGUUU<br>UGUC   | ATATTTT<br>TTTTTTA        | 8 |
| hsa-miR-1261    | 308 | 8:1:1 | -3.7  | -13.22 | 9.52 | AUGGAU<br>AAGGCU<br>UUGGCU<br>U     | TTATATA<br>TATA           | 8 |
| hsa-miR-142-5p  | 278 | 8:1:0 | -3.9  | -13.42 | 9.52 | CAUAAA<br>GUAGAA<br>AGCACU<br>ACU   | ACTATAT<br>ATATAT         | 8 |
| hsa-miR-548k    | 201 | 8:1:1 | -6.7  | -16.22 | 9.52 | AAAAGU<br>ACUUGC<br>GGUUU<br>UGCU   | GTATTAT<br>TATATAC<br>A   | 8 |
| hsa-miR-590-3p  | 256 | 8:1:0 | -3    | -12.53 | 9.53 | UAAUUU<br>UAUGUA<br>UAAGCU<br>AGU   | TAATATT<br>ACAAC          | 8 |
| hsa-miR-568     | 207 | 8:1:1 | -6    | -15.54 | 9.54 | AUGUAU<br>AAAUGU<br>AUACAC<br>AC    | TTATATA<br>CATATT         | 8 |
| hsa-miR-568     | 295 | 8:1:1 | -4.4  | -13.99 | 9.59 | AUGUAU<br>AAAUGU<br>AUACAC<br>AC    | ATATATA<br>TAATACT<br>TA  | 8 |
| hsa-miR-1259    | 308 | 8:1:1 | -3.6  | -13.22 | 9.62 | UCCUG<br>AGACCC<br>UUUAAC<br>CUGUGA | TTATATA<br>TATATAT<br>TTC | 8 |
| hsa-miR-656     | 98  | 8:1:1 | -1.3  | -10.95 | 9.65 | AGGUUG<br>CCUGUG<br>AGGUGU<br>UCA   | AAAATGT<br>AA             | 8 |
| hsa-miR-142-5p  | 165 | 8:1:1 | -1.77 | -11.44 | 9.67 | CAUAAA<br>GUAGAA<br>AGCACU<br>ACU   | ATTTTTTT<br>TTT           | 8 |
| hsa-miR-494     | 318 | 8:1:0 | -2.8  | -12.48 | 9.68 | AGGUUG<br>UCCGUG<br>UUGUCU<br>UCUCU | ATATTTT<br>AACAA          | 8 |
| hsa-miR-1259    | 218 | 8:1:1 | -2.31 | -12.03 | 9.72 | UCCUG<br>AGACCC<br>UUUAAC<br>CUGUGA | TAAATA<br>TTATTTA<br>T    | 8 |
| hsa-miR-374b    | 251 | 8:1:0 | -3.8  | -13.55 | 9.75 | AUAUAA<br>UACAAC<br>CUGCUA<br>AGUG  | TATTATA<br>AT             | 8 |
| hsa-miR-633     | 231 | 8:1:1 | -1.4  | -11.2  | 9.8  | CUAAUA<br>GUAUCU<br>ACCACA<br>AUAAA | ATTAATA<br>TATA           | 8 |
| hsa-miR-369-3p  | 201 | 8:1:0 | -6.4  | -16.22 | 9.82 | AAUAAU<br>ACAUGG<br>UUGAUC<br>UUU   | GTATTAT<br>TATATA         | 8 |
| hsa-miR-548d-5p | 166 | 8:1:1 | -1.7  | -11.53 | 9.83 | AAAAGU<br>AAUUGU<br>GGUUUU<br>UGCC  | TTTTTTTT                  | 8 |

|                 |     |       |      |        |       |                                               |                           |   |
|-----------------|-----|-------|------|--------|-------|-----------------------------------------------|---------------------------|---|
| hsa-miR-568     | 312 | 8:1:1 | -4.2 | -14.05 | 9.85  | AUGUAU<br>AAAUGU<br>AUACAC<br>AC              | ATATATA<br>TATTTCA<br>A   | 8 |
| hsa-miR-568     | 182 | 8:1:1 | -3   | -12.88 | 9.88  | AUGUAU<br>AAAUGU<br>AUACAC<br>AC              | ATATATA<br>TAA            | 8 |
| hsa-miR-203     | 259 | 8:1:1 | -2.5 | -12.4  | 9.9   | AGUGGU<br>UCUJAA<br>CAGUUC<br>AACAGU<br>U     | TATTACA<br>ACTATTA<br>TA  | 8 |
| hsa-miR-1272    | 253 | 8:1:1 | -2.6 | -12.55 | 9.95  | GAUGAU<br>GAUGGC<br>AGCAAA<br>UUCUGA<br>AA    | TTATAAT<br>ATTACAA<br>CTA | 8 |
| hsa-miR-633     | 252 | 8:1:1 | -3.1 | -13.17 | 10.07 | CUAAUA<br>GUAUCU<br>ACCACA<br>AUAAA<br>UAAAGU | ATTATAA<br>T              | 8 |
| hsa-miR-559     | 116 | 8:1:1 | -2.6 | -12.69 | 10.09 | AAAUAU<br>GCACCA<br>AAA                       | TTTTTTTT<br>G             | 8 |
| hsa-miR-590-3p  | 102 | 8:1:1 | -0.1 | -10.22 | 10.12 | UAAUUU<br>UAUGUA<br>UAAGCU<br>AGU             | TGTAATT<br>GTTGTT         | 8 |
| hsa-miR-548c-5p | 166 | 8:1:1 | -1.4 | -11.53 | 10.13 | AAAAGU<br>AAUUGC<br>GGUUUU<br>UGCC            | TTTTTTTT<br>TTAAA         | 8 |
| hsa-miR-369-3p  | 250 | 8:1:0 | -3.5 | -13.66 | 10.16 | AAUAAU<br>ACAUGG<br>UUGAUC<br>UUU             | ATATTAT<br>AA             | 8 |
| hsa-miR-656     | 301 | 8:1:0 | -3.5 | -13.67 | 10.17 | AGGUUG<br>CCUGUG<br>AGGUGU<br>UCA             | ATAATAC<br>TTA            | 8 |
| hsa-miR-559     | 114 | 8:1:1 | -2.2 | -12.41 | 10.21 | UAAAGU<br>AAAUAU<br>GCACCA<br>AAA             | TTTTTTTT<br>TTGT          | 8 |
| hsa-miR-548m    | 162 | 8:1:1 | -1.7 | -11.99 | 10.29 | CAAAGG<br>UAUUUG<br>UGGUUU<br>UUG             | TATATTT<br>TTTT           | 8 |
| hsa-miR-361-5p  | 121 | 8:1:1 | -3   | -13.33 | 10.33 | UUAUCA<br>GAAUCU<br>CCAGGG<br>GUAC            | TTTGTTA<br>GA             | 8 |
| hsa-miR-548m    | 317 | 8:1:1 | -2.8 | -13.22 | 10.42 | CAAAGG<br>UAUUUG<br>UGGUUU<br>UUG             | TATATTT<br>CAACAA<br>ATAC | 8 |
| hsa-miR-1259    | 180 | 8:1:1 | -2.7 | -13.12 | 10.42 | UCCUG<br>AGACCC<br>UUUAAC<br>CUGUGA           | ATATATA<br>TATA           | 8 |
| hsa-miR-548d-5p | 204 | 8:1:1 | -5.6 | -16.03 | 10.43 | AAAAGU<br>AAUUGU<br>GGUUUU<br>UGCC            | TTATTAT<br>A              | 8 |

|                 |     |       |       |        |       |                                       |                          |   |
|-----------------|-----|-------|-------|--------|-------|---------------------------------------|--------------------------|---|
| hsa-miR-1259    | 279 | 8:1:1 | -3    | -13.5  | 10.5  | UCCCUG<br>AGACCC<br>UUUAAC<br>CUGUGA  | CTATATA<br>TATATAA<br>AT | 8 |
| hsa-miR-548b-5p | 166 | 8:1:1 | -0.98 | -11.53 | 10.55 | AAAAGU<br>AAUUGU<br>GGUUUU<br>GGCC    | TTTTTTTT<br>TTAAAAA<br>T | 8 |
| hsa-miR-153     | 279 | 8:1:1 | -2.9  | -13.5  | 10.6  | UCAUUU<br>UUGUGA<br>UGUUGC<br>AGCU    | CTATATA<br>T             | 8 |
| hsa-miR-380     | 234 | 8:1:1 | -1.7  | -12.33 | 10.63 | UGGUUG<br>ACCAUA<br>GAACAU<br>GCGC    | AATATAT<br>ATTATA        | 8 |
| hsa-miR-641     | 165 | 8:1:1 | -0.8  | -11.44 | 10.64 | AAAGAC<br>AUAGGA<br>UAGAGU<br>CACCCUC | ATTTTTTT<br>TTTA         | 8 |
| hsa-miR-633     | 203 | 8:0:1 | -5.4  | -16.07 | 10.67 | CUAAUA<br>GUAUCU<br>ACCACA<br>AUAAA   | ATTATTA<br>TATACAT<br>A  | 8 |
| hsa-miR-155     | 200 | 8:1:1 | -5.6  | -16.27 | 10.67 | UUAAUG<br>CUAAUC<br>GUGAUA<br>GGGGU   | AGTATTA<br>TTATATA<br>C  | 8 |
| hsa-miR-374a    | 202 | 8:1:0 | -5.5  | -16.21 | 10.71 | UUAUAA<br>UACAAC<br>CUGAUA<br>AGUG    | TATTATT<br>AT            | 8 |
| hsa-miR-374b    | 202 | 8:1:0 | -5.5  | -16.21 | 10.71 | AUAUAA<br>UACAAC<br>CUGCUA<br>AGUG    | TATTATT<br>ATATACA<br>TA | 8 |
| hsa-miR-590-5p  | 197 | 8:1:1 | -5    | -15.73 | 10.73 | GAGCUU<br>AUUCAU<br>AAAAGU<br>GCAG    | ATAAGTA<br>TTAT          | 8 |
| hsa-miR-568     | 155 | 8:1:1 | -2.7  | -13.43 | 10.73 | AUGUAU<br>AAAUGU<br>AUACAC<br>AC      | TAATATA<br>TATATT        | 8 |
| hsa-miR-613     | 258 | 8:1:1 | -1.8  | -12.55 | 10.75 | AGGAAU<br>GUUCCU<br>UCUUUG<br>CC      | ATATTAC<br>AA            | 8 |
| hsa-miR-944     | 303 | 8:1:1 | -3.4  | -14.18 | 10.78 | AAAUUA<br>UUGUAC<br>AUCGGA<br>UGAG    | AATACTT<br>ATATA         | 8 |
| hsa-miR-889     | 257 | 8:1:1 | -1.7  | -12.5  | 10.8  | AAUGGC<br>UGUCCG<br>UAGUAU<br>GGUC    | AATATTA<br>CAACTAT<br>T  | 8 |
| hsa-miR-548j    | 204 | 8:1:1 | -5.2  | -16.03 | 10.83 | AAAAGU<br>AAUUGC<br>GGUCUU<br>UGGU    | TTATTAT<br>ATACATA<br>TT | 8 |
| hsa-miR-186     | 166 | 8:1:1 | -0.7  | -11.53 | 10.83 | CAAAGA<br>AUUCUC<br>CUUUUG<br>GGCU    | TTTTTTTT<br>T            | 8 |
| hsa-miR-1264    | 303 | 8:1:0 | -3.3  | -14.18 | 10.88 | CAAGUC<br>UUUUUU<br>GAGCAC<br>CUGUU   | AATACTT<br>AT            | 8 |

|                |     |       |       |        |       |                                                        |                           |   |
|----------------|-----|-------|-------|--------|-------|--------------------------------------------------------|---------------------------|---|
| hsa-miR-331-5p | 211 | 8:1:1 | -3.8  | -14.8  | 11    | CUAGGU<br>AUGGUC<br>CCAGGG<br>AUCC<br>AGUGGU<br>UCUJAA | ATACATA<br>TTAAATA<br>TTA | 8 |
| hsa-miR-203    | 214 | 8:1:1 | -3.8  | -14.83 | 11.03 | CAGUUC<br>AACAGU<br>U<br>AGAGGU                        | CATATTA<br>AATATTA        | 8 |
| hsa-miR-655    | 200 | 8:1:0 | -5.2  | -16.27 | 11.07 | UAUCCG<br>UGUUUAU<br>GUUC<br>CAAAAG                    | AGTATTA<br>TTATAT         | 8 |
| hsa-miR-548n   | 168 | 8:1:1 | -1.1  | -12.17 | 11.07 | UAAUUG<br>UGGAUU<br>UUGU<br>CUAAUA                     | TTTTTTTT<br>A             | 8 |
| hsa-miR-633    | 272 | 8:1:1 | -0.6  | -11.7  | 11.1  | GUAUCU<br>ACCACA<br>AUAAA<br>UAAUAC                    | ATAATTA<br>CTATA          | 8 |
| hsa-miR-429    | 256 | 8:1:1 | -1.3  | -12.53 | 11.23 | UGUCUG<br>GUAAAA<br>CCGU<br>UGGUUG                     | TAATATT<br>ACAAC          | 8 |
| hsa-miR-380    | 206 | 8:0:1 | -4.7  | -15.98 | 11.28 | ACCAUA<br>GAACAU<br>GCGC<br>AAAGAC                     | ATTATAT<br>A              | 8 |
| hsa-miR-641    | 163 | 8:1:1 | -0.4  | -11.69 | 11.29 | AUAGGA<br>UAGAGU<br>CACCCUC<br>CUAAUA                  | ATATTTT<br>TTTTTTA        | 8 |
| hsa-miR-633    | 257 | 8:1:0 | -1.2  | -12.5  | 11.3  | GUAUCU<br>ACCACA<br>AUAAA<br>CAAAAG                    | AATATTA<br>CAACTAT        | 8 |
| hsa-miR-548n   | 117 | 8:1:1 | -1.31 | -12.64 | 11.33 | UAAUUG<br>UGGAUU<br>UUGU<br>CAAAAG                     | TTTTTTT<br>GTT            | 8 |
| hsa-miR-548n   | 167 | 8:1:1 | -0.5  | -11.86 | 11.36 | UAAUUG<br>UGGAUU<br>UUGU<br>UGGUUG                     | TTTTTTTT<br>TAA           | 8 |
| hsa-miR-380    | 156 | 8:1:1 | -1.7  | -13.11 | 11.41 | ACCAUA<br>GAACAU<br>GCGC<br>UUAUAA                     | AATATAT<br>ATATTT         | 8 |
| hsa-miR-374a   | 205 | 8:1:0 | -4.6  | -16.02 | 11.42 | UACAAC<br>CUGAUA<br>AGUG<br>UUGCAU                     | TATTATA<br>TACATAT<br>TAA | 8 |
| hsa-miR-448    | 209 | 8:1:1 | -3.5  | -14.94 | 11.44 | AUGUAG<br>GAUGUC<br>CCAU<br>UUAAGA                     | ATATACA<br>TATTA          | 8 |
| hsa-miR-499-5p | 200 | 8:1:0 | -4.8  | -16.27 | 11.47 | CUUGCA<br>GUGAUG<br>UUU<br>CAAAAG                      | AGTATTA<br>TTA            | 8 |
| hsa-miR-548n   | 115 | 8:1:1 | -1.33 | -12.8  | 11.47 | UAAUUG<br>UGGAUU<br>UUGU<br>UCCCUG                     | TTTTTTTT<br>TGTTAGA<br>AT | 8 |
| hsa-miR-1259   | 293 | 8:1:1 | -2.7  | -14.2  | 11.5  | AGACCC<br>UUU AAC<br>CUGUGA                            | ATATATA<br>TA             | 8 |

|              |     |       |       |        |       |                                                |                           |   |
|--------------|-----|-------|-------|--------|-------|------------------------------------------------|---------------------------|---|
| hsa-miR-137  | 200 | 8:1:1 | -4.7  | -16.27 | 11.57 | UUUUUG<br>CUUUAAG<br>AAUACG<br>CGUAG<br>GUGUUG | AGTATTA<br>TTAT           | 8 |
| hsa-miR-653  | 173 | 8:1:1 | -1.6  | -13.17 | 11.57 | AAACAA<br>UCUCUA<br>CUG<br>CUAAUA              | TTTTAAA<br>ATATATA<br>TA  | 8 |
| hsa-miR-633  | 153 | 8:1:1 | -2.72 | -14.31 | 11.59 | GUAUCU<br>ACCACA<br>AUAAA<br>AGGUUG            | ATTAATA<br>TATATAT        | 8 |
| hsa-miR-494  | 165 | 8:1:1 | 0.2   | -11.44 | 11.64 | UCCGUG<br>UUGUCU<br>UCUCU<br>UAGCAA            | ATTTTTTT<br>T             | 8 |
| hsa-miR-548p | 167 | 8:1:1 | -0.21 | -11.86 | 11.65 | AAACUG<br>CAGUUA<br>CUUU<br>CAAAAG             | TTTTTTTT<br>TAAAAA        | 8 |
| hsa-miR-548n | 169 | 8:1:1 | -0.8  | -12.49 | 11.69 | UAAUUG<br>UGGAUU<br>UUGU<br>AUCAAG             | TTTTTTTA<br>AAAATAT<br>A  | 8 |
| hsa-miR-561  | 163 | 8:1:1 | 0     | -11.69 | 11.69 | GAUCUU<br>AAACUU<br>UGCC<br>UAAAGU             | ATATTTT<br>TTTTTTA<br>A   | 8 |
| hsa-miR-559  | 115 | 8:1:1 | -1.1  | -12.8  | 11.7  | AAAUAU<br>GCACCA<br>AAA<br>CAGUUA              | TTTTTTTT<br>TGTTAGA<br>AT | 8 |
| hsa-miR-101  | 201 | 8:1:1 | -4.5  | -16.22 | 11.72 | UCACAG<br>UGCUGA<br>UGCU<br>UUAAUG             | GTATTAT<br>TATATAC        | 8 |
| hsa-miR-155  | 257 | 8:1:1 | -0.7  | -12.5  | 11.8  | CUAAUC<br>GUGAUA<br>GGGGU<br>AGAGGU            | AATATTA<br>CAA            | 8 |
| hsa-miR-655  | 249 | 8:1:0 | -1.9  | -13.7  | 11.8  | UAUCCG<br>UGUUUA<br>GUUC<br>AUUAUA             | TATATTA<br>TAATATT<br>A   | 8 |
| hsa-miR-374b | 205 | 8:1:0 | -4.2  | -16.02 | 11.82 | UACAAC<br>CUGCUA<br>AGUG<br>AGGUUG             | TATTATA<br>TACATAT        | 8 |
| hsa-miR-494  | 163 | 8:1:1 | 0.2   | -11.69 | 11.89 | UCCGUG<br>UUGUCU<br>UCUCU<br>UGGUUG            | ATATTTT<br>TT             | 8 |
| hsa-miR-380  | 278 | 8:1:1 | -1.5  | -13.42 | 11.92 | ACCAUA<br>GAACAU<br>GCGC<br>CAAAAG             | ACTATAT<br>ATATAT         | 8 |
| hsa-miR-548n | 116 | 8:1:1 | -0.77 | -12.69 | 11.92 | UAAUUG<br>UGGAUU<br>UUGU<br>AAAAGU             | TTTTTTTT<br>GTTAGA<br>AT  | 8 |
| hsa-miR-548i | 166 | 8:1:1 | 0.4   | -11.53 | 11.93 | AAUUGC<br>GGAUUU<br>UGCC<br>AGGUUG             | TTTTTTTT<br>TAAAA         | 8 |
| hsa-miR-656  | 250 | 8:1:0 | -1.6  | -13.66 | 12.06 | CCUGUG<br>AGGUGU<br>UCA                        | ATATTAT<br>AATATTA<br>C   | 8 |

|                 |     |       |      |        |       |                                              |                           |   |
|-----------------|-----|-------|------|--------|-------|----------------------------------------------|---------------------------|---|
| hsa-miR-651     | 252 | 8:1:1 | -1   | -13.17 | 12.17 | UUUAGG<br>AUAAGC<br>UUGACU<br>UUUG<br>AAAAGU | ATTATAA<br>TAT            | 8 |
| hsa-miR-548h    | 204 | 8:1:1 | -3.8 | -16.03 | 12.23 | AAUCGC<br>GGUUUU<br>UGUC<br>UGGUUG           | TTATTAT<br>ATA            | 8 |
| hsa-miR-380     | 255 | 8:1:1 | -0.2 | -12.53 | 12.33 | ACCAUA<br>GAACAU<br>GCGC<br>AAAAGU           | ATAATAT<br>TACA           | 8 |
| hsa-miR-548c-5p | 204 | 8:1:1 | -3.7 | -16.03 | 12.33 | AAUUGC<br>GGUUUU<br>UGCC<br>CAUAAA           | TTATTAT<br>ATACA          | 8 |
| hsa-miR-142-5p  | 250 | 8:1:1 | -1.3 | -13.66 | 12.36 | GUAGAA<br>AGCACU<br>ACU<br>UAGCAA            | ATATTAT<br>AATATTA        | 8 |
| hsa-miR-548p    | 168 | 8:1:1 | 0.35 | -12.17 | 12.52 | AAACUG<br>CAGUUA<br>CUUU<br>UAGAUA           | TTTTTTTT<br>AAAAAT<br>A   | 8 |
| hsa-miR-577     | 115 | 8:1:1 | -0.2 | -12.8  | 12.6  | AAAUAU<br>UGGUAC<br>CUG<br>CGUGUA            | TTTTTTTT<br>TG            | 8 |
| hsa-miR-223     | 192 | 8:1:1 | -3   | -15.7  | 12.7  | UUUGAC<br>AAGCUG<br>AGUU<br>AAAAGU           | AACTAAT<br>AAGTATT<br>ATT | 8 |
| hsa-miR-548i    | 204 | 8:1:1 | -3.3 | -16.03 | 12.73 | AAUUGC<br>GGUUUU<br>UGCC<br>AAAAGU           | TTATTAT<br>ATACATA<br>TTA | 8 |
| hsa-miR-548a-5p | 166 | 8:1:1 | 1.2  | -11.53 | 12.73 | AAUUGC<br>GAGUUU<br>UACC<br>UAAAGU           | TTTTTTTT<br>T             | 8 |
| hsa-miR-559     | 169 | 8:1:1 | 0.3  | -12.49 | 12.79 | AAAUAU<br>GCACCA<br>AAA<br>AAAAGU            | TTTTTTTA<br>AAA           | 8 |
| hsa-miR-548j    | 166 | 8:1:1 | 1.3  | -11.53 | 12.83 | AAUUGC<br>GGUCUU<br>UGGU<br>UAGAUA           | TTTTTTTT<br>TTAAAAA       | 8 |
| hsa-miR-577     | 117 | 8:1:1 | 0.2  | -12.64 | 12.84 | AAAUAU<br>UGGUAC<br>CUG<br>UAGCAA            | TTTTTTT<br>GTTAGA<br>AT   | 8 |
| hsa-miR-548p    | 169 | 8:1:1 | 0.4  | -12.49 | 12.89 | AAACUG<br>CAGUUA<br>CUUU<br>UAAAGU           | TTTTTTTA<br>A             | 8 |
| hsa-miR-559     | 168 | 8:1:1 | 0.8  | -12.17 | 12.97 | AAAUAU<br>GCACCA<br>AAA<br>CAUCUU            | TTTTTTTT<br>AAA           | 8 |
| hsa-miR-200b    | 202 | 8:1:1 | -3.2 | -16.21 | 13.01 | ACUGGG<br>CAGCAU<br>UGGA<br>AAAAGU           | TATTATT<br>ATATACA<br>TAT | 8 |
| hsa-miR-548h    | 166 | 8:1:1 | 1.5  | -11.53 | 13.03 | AAUUGC<br>GGUUUU<br>UGUC                     | TTTTTTTT<br>TTAAAAA<br>TA | 8 |

|                |     |       |      |        |       |                                              |                           |   |
|----------------|-----|-------|------|--------|-------|----------------------------------------------|---------------------------|---|
| hsa-miR-577    | 116 | 8:1:1 | 0.4  | -12.69 | 13.09 | UAGAUA<br>AAAUUAU<br>UGGUAC<br>CUG<br>CGUCUU | TTTTTTTT<br>GTTAG         | 8 |
| hsa-miR-200c   | 202 | 8:1:1 | -2.9 | -16.21 | 13.31 | ACCCAG<br>CAGUGU<br>UUGG<br>UUAUGG           | TATTATT<br>ATATACA<br>TA  | 8 |
| hsa-miR-584    | 178 | 8:1:1 | -0.3 | -13.74 | 13.44 | UUUGCC<br>UGGGAC<br>UGAG<br>AGGUUG           | AAATATA<br>TA             | 8 |
| hsa-miR-410    | 206 | 8:1:0 | -2.4 | -15.98 | 13.58 | UCUGUG<br>AUGAGU<br>UCG<br>UUUGUU            | ATTATAT<br>ACA            | 8 |
| hsa-miR-375    | 194 | 8:1:1 | -2.5 | -16.13 | 13.63 | CGUUCG<br>GCUCGC<br>GUGA<br>GUGUCU           | CTAATAA<br>GTATTAT<br>T   | 8 |
| hsa-miR-511    | 178 | 8:1:1 | -0.1 | -13.74 | 13.64 | UUUGCU<br>CUGCAG<br>UCA<br>UUA AUG           | AAATATA<br>TATATA         | 8 |
| hsa-miR-155    | 203 | 8:1:1 | -2.4 | -16.07 | 13.67 | CUAAUC<br>GUGAUA<br>GGGGU<br>AAUGGA          | ATTATTA<br>TATACAT        | 8 |
| hsa-miR-1246   | 292 | 8:1:1 | 0.2  | -13.95 | 14.15 | UUUUUG<br>GAGCAG<br>G<br>AAAUUA              | AATATAT<br>A              | 8 |
| hsa-miR-944    | 196 | 8:1:1 | -1.9 | -16.07 | 14.17 | UUGUAC<br>AUCGGA<br>UGAG<br>UAAUCC           | AATAAGT<br>ATT            | 8 |
| hsa-miR-500    | 199 | 8:1:1 | -1.5 | -15.87 | 14.37 | UUGC UA<br>CCUGGG<br>UGAGA<br>CAUAAA         | AAGTATT<br>ATTATAT<br>ACA | 8 |
| hsa-miR-142-5p | 206 | 8:1:1 | -1.6 | -15.98 | 14.38 | GUAGAA<br>AGCACU<br>ACU<br>AGGUUG            | ATTATAT<br>ACATATT        | 8 |
| hsa-miR-656    | 206 | 8:1:0 | -0.7 | -15.98 | 15.28 | CCUGUG<br>AGGUGU<br>UCA<br>UUAUUG            | ATTATAT<br>ACATATT<br>A   | 8 |
| hsa-miR-137    | 193 | 8:1:1 | -0.8 | -16.11 | 15.31 | CUUAAG<br>AAUACG<br>CGUAG                    | ACTAATA<br>AGTAT          | 8 |

Seq ID length Squence  
5'UTR of 230  
var AATATTCATATCCCACATTGTCATATATTTATAATATATATAAAATTTAAAATATATATATATATATTCTTCA  
group C AATATCTACATAAATATATATGTATAACATGCATGTATTATTTTATACAACACATCGATTACATTTTAG  
CGTTTTTTCATCACATATAATACGACTAAGAAAACAAAATAACATCACAAACATAGTGACTAC  
CATTACATGATATTACCACATAAT

Note: the target sites are shown in italic

Target Prediction:

| microRN A   | Position in UTR | Seed  | dGduplex | dGopen | ddG   | Seq                                          | Target site                        | Num of Matches |
|-------------|-----------------|-------|----------|--------|-------|----------------------------------------------|------------------------------------|----------------|
| hsa-miR-451 | 137             | 8:1:1 | -3.8     | -9.52  | 5.72  | AAACCG<br>UUACCA<br>UUACUG<br>AGUU<br>UGAGGU | AGCGTTT<br>TTTTCCA<br>TCACATA<br>T | 8              |
| hsa-let-7b  | 218             | 8:1:1 | -16.6    | -4.99  | -11.6 | AGUAGG<br>UUGUGU<br>GGUU                     | TTACCAC<br>ATAAT                   | 8              |

|                |     |       |        |       |        |                                              |                         |   |
|----------------|-----|-------|--------|-------|--------|----------------------------------------------|-------------------------|---|
| hsa-let-7c     | 218 | 8:1:1 | -16.6  | -4.99 | -11.6  | UGAGGU<br>AGUAGG<br>UUGUAU<br>GGUU<br>UAGGUA | TTACCAC<br>A            | 8 |
| hsa-miR-196a   | 201 | 8:1:1 | -19    | -7.61 | -11.38 | GUUUCA<br>UGUUGU<br>UGGG<br>UAUGUG           | ACTACC<br>ATTACA        | 8 |
| hsa-miR-299-3p | 152 | 8:1:1 | -16.8  | -6.21 | -10.58 | GGAUGG<br>UAAACC<br>GCUU<br>UAGGUA           | CACATAT<br>AAT          | 8 |
| hsa-miR-196b   | 201 | 8:1:1 | -17.3  | -7.61 | -9.68  | GUUUCC<br>UGUUGU<br>UGGG<br>UGAGGU           | ACTACC<br>ATTACA        | 8 |
| hsa-let-7b     | 202 | 8:1:1 | -16.5  | -7.32 | -9.17  | AGUAGG<br>UUGUGU<br>GGUU<br>CUGGAG           | CTACCAT<br>TACA         | 8 |
| hsa-miR-1270   | 217 | 8:1:1 | -14    | -5.06 | -8.93  | AUAUGG<br>AAGAGC<br>UGUGU<br>UGAGGU          | ATTACCA<br>CATAA        | 8 |
| hsa-let-7a     | 218 | 8:1:1 | -13.9  | -4.99 | -8.9   | AGUAGG<br>UUGUAU<br>AGUU<br>UGAGGU           | TTACCAC<br>ATA          | 8 |
| hsa-let-7f     | 218 | 8:1:1 | -13.9  | -4.99 | -8.9   | AGUAGA<br>UUGUAU<br>AGUU<br>UGUGAG           | TTACCAC<br>ATAA         | 8 |
| hsa-miR-1294   | 181 | 8:1:0 | -12.4  | -3.56 | -8.83  | GUUGGC<br>AUUGUU<br>GUCU<br>CAGGAU           | ACATCA<br>CAACAA<br>A   | 8 |
| hsa-miR-1265   | 15  | 8:1:1 | -10.6  | -2.11 | -8.48  | GUGGUC<br>AAGUGU<br>UGUU<br>UAUGUG           | ACATTGT<br>CATATAT      | 8 |
| hsa-miR-299-3p | 220 | 8:1:0 | -13.26 | -4.99 | -8.26  | GGAUGG<br>UAAACC<br>GCUU<br>UUUGGC           | ACCACA<br>TAAT          | 8 |
| hsa-miR-182    | 18  | 8:1:1 | -11.2  | -3.01 | -8.19  | AAUGGU<br>AGAACU<br>CACACU<br>UGAGGU         | TTGTCAT<br>ATATTTA<br>T | 8 |
| hsa-let-7i     | 218 | 8:1:1 | -12.9  | -4.99 | -7.9   | AGUAGU<br>UUGUGC<br>UGUU<br>UGAGGU           | TTACCAC<br>ATAAT        | 8 |
| hsa-miR-98     | 218 | 8:1:1 | -12.6  | -4.99 | -7.6   | AGUAAG<br>UUGUAU<br>UGUU<br>UGGGUG           | TTACCAC<br>ATAAT        | 8 |
| hsa-miR-1293   | 201 | 8:1:1 | -15.2  | -7.61 | -7.58  | GUCUGG<br>AGAUUU<br>GUGC<br>UGAGGU           | ACTACC<br>ATTAC         | 8 |
| hsa-let-7c     | 202 | 8:1:1 | -14.6  | -7.32 | -7.27  | AGUAGG<br>UUGUAU<br>GGUU<br>GAAGUU           | CTACCAT<br>TACATG       | 8 |
| hsa-miR-382    | 178 | 8:1:1 | -12.4  | -5.2  | -7.19  | GUUCGU<br>GGUGGA<br>UUCG                     | ATAACAT<br>CACAAC<br>A  | 8 |

|                |     |       |        |        |       |                                              |                           |   |
|----------------|-----|-------|--------|--------|-------|----------------------------------------------|---------------------------|---|
| hsa-let-7g     | 218 | 8:1:1 | -12.1  | -4.99  | -7.1  | UGAGGU<br>AGUAGU<br>UUGUAC<br>AGUU<br>AGAGGU | TTACCAC<br>ATA            | 8 |
| hsa-let-7d     | 218 | 8:1:1 | -11.9  | -4.99  | -6.9  | AGUAGG<br>UUGCAU<br>AGUU<br>UGAGGU           | TTACCAC<br>ATAAT          | 8 |
| hsa-miR-98     | 202 | 8:1:1 | -14.2  | -7.32  | -6.87 | AGUAAG<br>UUGUAU<br>UGUU<br>UGAGGU           | CTACCAT<br>TACATGA<br>T   | 8 |
| hsa-let-7i     | 202 | 8:1:1 | -14    | -7.32  | -6.67 | AGUAGU<br>UUGUGC<br>UGUU<br>UGGUUG           | CTACCAT<br>TACATGA<br>TAT | 8 |
| hsa-miR-380    | 207 | 8:1:0 | -11.9  | -5.41  | -6.48 | ACCAUA<br>GAACAU<br>GCGC<br>UAUGGC           | ATTACAT<br>GATAT          | 8 |
| hsa-miR-183    | 18  | 8:1:1 | -9.3   | -3.01  | -6.29 | ACUGGU<br>AGAAUU<br>CACU<br>UGAGGU           | TTGTCAT<br>ATATTTA        | 8 |
| hsa-let-7g     | 202 | 8:1:1 | -13.4  | -7.32  | -6.07 | AGUAGU<br>UUGUAC<br>AGUU<br>UUGUGU           | CTACCAT<br>TACATGA<br>TAT | 8 |
| hsa-miR-592    | 19  | 8:1:1 | -9.3   | -3.26  | -6.03 | CAAUAU<br>GCGAUG<br>AUGU<br>AAAUAU           | TGTCATA<br>TATTTAT<br>AAT | 8 |
| hsa-miR-1277   | 74  | 8:1:0 | -14.11 | -8.33  | -5.77 | AUAUUAU<br>AUAUGU<br>ACGUUAU<br>GUGUGU       | TCTACAT<br>AAAT           | 8 |
| hsa-miR-147    | 221 | 8:1:1 | -10.7  | -4.99  | -5.7  | GGAAAU<br>GCUUCU<br>GC<br>CAAGUC             | CCACAT<br>AAT             | 8 |
| hsa-miR-224    | 198 | 8:1:0 | -13.1  | -7.47  | -5.62 | ACUAGU<br>GGUUCC<br>GUU<br>AGGUGG            | GTGACT<br>ACCA            | 8 |
| hsa-miR-323-5p | 200 | 8:1:1 | -13.4  | -7.83  | -5.56 | UCCGUG<br>GCGCGU<br>UCGC<br>UGAGGU           | GACTAC<br>CATTA           | 8 |
| hsa-let-7a     | 202 | 8:1:1 | -12.6  | -7.32  | -5.27 | AGUAGG<br>UUGUAU<br>AGUU<br>UGUUCA           | CTACCAT<br>TACAT          | 8 |
| hsa-miR-1206   | 78  | 8:1:1 | -14.4  | -9.12  | -5.27 | UGUAGA<br>UGUUUA<br>AGC<br>UAAUGA            | CATAAAT<br>ATA            | 8 |
| hsa-miR-580    | 17  | 8:1:0 | -7.71  | -2.55  | -5.15 | UUCAUC<br>AGACUC<br>AGAU<br>AUGUAU           | ATTGTCA<br>TATATTT<br>ATA | 8 |
| hsa-miR-297    | 96  | 8:1:1 | -16.3  | -11.46 | -4.83 | GUGUGC<br>AUGUGC<br>AUG<br>UCCUG             | ACATGC<br>ATGTATT<br>A    | 8 |
| hsa-miR-1259   | 21  | 8:0:1 | -8.4   | -3.78  | -4.61 | AGACCC<br>UUUAAC<br>CUGUGA                   | TCATATA<br>TTTATA         | 8 |

|                 |     |       |        |       |       |                                                                          |                           |   |
|-----------------|-----|-------|--------|-------|-------|--------------------------------------------------------------------------|---------------------------|---|
| hsa-miR-1270    | 73  | 8:1:0 | -13.1  | -8.53 | -4.56 | CUGGAG<br>AUAUUGG<br>AAGAGC<br>UGUGU<br>CUAGCA                           | ATCTACA<br>TAAAT          | 8 |
| hsa-miR-585     | 161 | 8:1:1 | -9.9   | -5.64 | -4.25 | CACAGA<br>UACGCC<br>CAGA<br>AGUAUU<br>CUGUAC<br>CAGGGA<br>AGGU<br>UGAGGU | TACGACT<br>AAGAAA         | 8 |
| hsa-miR-630     | 157 | 8:1:1 | -9.9   | -5.7  | -4.19 | AGUAGA<br>UUGUAU<br>AGUU<br>UUCUGC<br>UGUCGG<br>UCCCCAC<br>AUGGAG        | ATAATAC<br>GACTAA<br>GA   | 8 |
| hsa-let-7f      | 202 | 8:1:1 | -11.5  | -7.32 | -4.17 | AGUAGA<br>UUGUAU<br>AGUU<br>UUCUGC<br>UGUCGG<br>UCCCCAC<br>AUGGAG        | CTACCAT<br>TACA           | 8 |
| hsa-miR-541     | 200 | 8:1:1 | -12    | -7.83 | -4.16 | AUAGAU<br>AUAGAA<br>AU<br>AGAGGU                                         | GACTAC<br>CATT            | 8 |
| hsa-miR-620     | 144 | 8:1:1 | -10.4  | -6.28 | -4.11 | AGUAGG<br>UUGCAU<br>AGUU<br>UGUAGU                                       | TTTTCCA<br>TCACAT         | 8 |
| hsa-let-7d      | 202 | 8:1:1 | -11.39 | -7.32 | -4.06 | GUUUCC<br>UACUUU<br>AUGGA<br>UGAUAU                                      | CTACCAT<br>TA             | 8 |
| hsa-miR-142-3p  | 205 | 8:1:1 | -8.5   | -4.47 | -4.02 | GUUUGA<br>UAUUGG<br>GUU<br>CACUGU                                        | CCATTAC<br>AT             | 8 |
| hsa-miR-190b    | 34  | 8:1:1 | -10.4  | -6.49 | -3.9  | GUCCUU<br>UCUGCG<br>UAG<br>AGGGCU<br>UAGCUG<br>CUUGUG<br>AGCA            | ATATATA<br>TA             | 8 |
| hsa-miR-892a    | 193 | 8:1:1 | -10.7  | -7.22 | -3.47 | AGAGCU<br>UAGCUG<br>AUUGGU<br>GAAC<br>AUGUAU                             | ACATAGT<br>GACTAC         | 8 |
| hsa-miR-27a     | 17  | 8:1:1 | -6     | -2.55 | -3.44 | GUGUGC<br>AUGUGC<br>AUG<br>UCUCUG<br>GAGGGA<br>AGCACU<br>UUCUG           | ATTGTCA<br>TATATTT<br>ATA | 8 |
| hsa-miR-27b     | 17  | 8:1:1 | -6     | -2.55 | -3.44 | AAGCUU<br>UUUGCU<br>CGAAUU<br>AUGU                                       | ATTGTCA<br>TATATTT<br>AT  | 8 |
| hsa-miR-297     | 153 | 8:0:1 | -9.71  | -6.27 | -3.43 | AAGAUG<br>UGGAAA<br>AAUUGG<br>AAUC<br>AAAAGU                             | ACATATA<br>ATACGA         | 8 |
| hsa-miR-518c    | 138 | 8:0:1 | -12.01 | -8.62 | -3.38 | AAUUGU<br>GGUUUU<br>GGCC                                                 | GCGTTTT<br>TTTCCAT<br>CA  | 8 |
| hsa-miR-208b    | 19  | 8:1:1 | -6.4   | -3.26 | -3.13 | AAGAUG<br>UGGAAA<br>AAUUGG<br>AAUC<br>AAAAGU                             | TGTCATA<br>TATTTAT        | 8 |
| hsa-miR-576-3p  | 152 | 8:1:1 | -9.1   | -6.21 | -2.88 | AAUUGU<br>GGUUUU<br>GGCC                                                 | CACATAT<br>AATACG<br>ACTA | 8 |
| hsa-miR-548b-5p | 128 | 8:1:0 | -10.4  | -7.61 | -2.78 | AAUUGU<br>GGUUUU<br>GGCC                                                 | TTACATT<br>TTAGC          | 8 |

|                 |     |       |       |       |       |                                                |                           |   |
|-----------------|-----|-------|-------|-------|-------|------------------------------------------------|---------------------------|---|
| hsa-miR-548h    | 128 | 8:1:0 | -10.4 | -7.61 | -2.78 | AAAAGU<br>AAUCGC<br>GGUUUU<br>UGUC<br>UUCAAG   | TTACATT<br>TTA            | 8 |
| hsa-miR-26a     | 209 | 8:1:0 | -8.3  | -5.57 | -2.72 | UAAUCC<br>AGGAUA<br>GGCU<br>UUCAAG             | TACATGA<br>TATTACC        | 8 |
| hsa-miR-26b     | 209 | 8:1:0 | -8.3  | -5.57 | -2.72 | UAAUUC<br>AGGAUA<br>GGU                        | TACATGA<br>TA             | 8 |
| hsa-miR-1270    | 144 | 8:1:1 | -9    | -6.28 | -2.71 | CUGGAG<br>AUAUGG<br>AAGAGC<br>UGUGU<br>UAAUUU  | TTTTCCA<br>TCACATA<br>TAA | 8 |
| hsa-miR-590-3p  | 213 | 8:1:1 | -7.9  | -5.3  | -2.59 | UAUGUA<br>UAAGCU<br>AGU                        | TGATATT<br>ACCA           | 8 |
| hsa-miR-208a    | 19  | 8:1:1 | -5.7  | -3.26 | -2.43 | GAGCUU<br>UUGGCC<br>CGGGUU<br>AUAC             | TGTCATA<br>TATTTAT<br>A   | 8 |
| hsa-miR-155     | 137 | 8:1:1 | -11.9 | -9.52 | -2.37 | UUA AUG<br>CUAAUC<br>GUGAUA<br>GGGGU<br>UGUAGU | AGCGTTT<br>TTTTCCA<br>T   | 8 |
| hsa-miR-142-3p  | 181 | 8:1:1 | -5.92 | -3.56 | -2.35 | GUUUCC<br>UACUUU<br>AUGGA<br>AGAAGG            | ACATCA<br>CA              | 8 |
| hsa-miR-1252    | 146 | 8:1:0 | -8.3  | -6.25 | -2.04 | AAAUUG<br>AAUUCA<br>UUUA<br>UGUAGU             | TTCCATC<br>AC             | 8 |
| hsa-miR-142-3p  | 160 | 8:1:1 | -7.59 | -5.65 | -1.93 | GUUUCC<br>UACUUU<br>AUGGA<br>UUCAAG            | ATACGA<br>CTAAGA<br>A     | 8 |
| hsa-miR-1297    | 209 | 8:1:0 | -7.5  | -5.57 | -1.92 | UAAUUC<br>AGGUG<br>AGGGGG                      | TACATGA<br>TATTACC        | 8 |
| hsa-miR-625     | 146 | 8:1:1 | -8    | -6.25 | -1.74 | AAAGUU<br>CUAUAG<br>UCC<br>UGAUAU              | TTCCATC<br>ACAT           | 8 |
| hsa-miR-190     | 193 | 8:1:1 | -8.7  | -7.22 | -1.47 | GUUUGA<br>UAUAUU<br>AGGU<br>UGAUAU             | ACATAGT<br>GAC            | 8 |
| hsa-miR-190b    | 193 | 8:1:1 | -8.7  | -7.22 | -1.47 | GUUUGA<br>UAUUGG<br>GUU                        | ACATAGT<br>GACTAC<br>C    | 8 |
| hsa-miR-548d-5p | 128 | 8:1:0 | -9    | -7.61 | -1.38 | AAAAGU<br>AAUUGU<br>GGUUUU<br>UGCC             | TTACATT<br>TTAGC          | 8 |
| hsa-miR-568     | 112 | 8:0:0 | -11.3 | -9.98 | -1.31 | AUGUAU<br>AAUUGU<br>AUACAC<br>AC               | TTATACA<br>ACACAT<br>CGA  | 8 |
| hsa-miR-548m    | 24  | 8:1:1 | -6.2  | -4.89 | -1.3  | CAAAGG<br>UAUUUG<br>UGGUUU<br>UUG              | TATATTT<br>ATAATAT<br>A   | 8 |

|                 |     |       |       |        |       |                                              |                          |   |
|-----------------|-----|-------|-------|--------|-------|----------------------------------------------|--------------------------|---|
| hsa-miR-433     | 195 | 8:1:1 | -8.69 | -7.42  | -1.26 | UACGGU<br>GAGCCU<br>GUCAUU<br>AUUC<br>CAAAAG | ATAGTG<br>ACTACC<br>A    | 8 |
| hsa-miR-548n    | 129 | 8:1:0 | -8.8  | -7.53  | -1.26 | JAAUUG<br>UGGAUU<br>UUGU<br>UGAUAU           | TACATTT<br>TAGCGTT       | 8 |
| hsa-miR-190     | 34  | 8:1:1 | -7.7  | -6.49  | -1.2  | GUUUGA<br>UAUAUU<br>AGGU<br>UGAGCU           | ATATATA<br>TAAATT        | 8 |
| hsa-miR-610     | 135 | 8:1:1 | -11.3 | -10.16 | -1.13 | AAAUGU<br>GUGCUG<br>GGA<br>AGGUUG            | TTAGCGT<br>TTT           | 8 |
| hsa-miR-410     | 20  | 8:1:0 | -4.7  | -3.6   | -1.09 | UCUGUG<br>AUGAGU<br>UCG<br>UUA AUG           | GTCATAT<br>ATTTA         | 8 |
| hsa-miR-155     | 204 | 8:1:0 | -5.6  | -4.51  | -1.08 | CUAAUC<br>GUGAUA<br>GGGGU<br>AAUGGC          | ACCATTA<br>CAT           | 8 |
| hsa-miR-889     | 214 | 8:0:1 | -6.2  | -5.14  | -1.05 | UGUCCG<br>UAGUAU<br>GGUC<br>UGUAAA           | GATATTA<br>CCACAT<br>AAT | 8 |
| hsa-miR-30e     | 26  | 8:1:1 | -6.7  | -5.85  | -0.84 | CAUCCU<br>UGACUG<br>GAAG<br>GAAAGC           | TATTTAT<br>AATATA        | 8 |
| hsa-miR-518a-3p | 138 | 8:0:1 | -9.34 | -8.62  | -0.71 | GCUUCC<br>CUUUGC<br>UGGA<br>AAAAGU           | GCGTTTT<br>TTCCAT<br>CAC | 8 |
| hsa-miR-548a-5p | 128 | 8:1:0 | -8.15 | -7.61  | -0.53 | AAUUGC<br>GAGUUU<br>UACC<br>AAAAGU           | TTACATT<br>T             | 8 |
| hsa-miR-548j    | 128 | 8:1:0 | -8.1  | -7.61  | -0.48 | AAUUGC<br>GGUCUU<br>UGGU<br>AAAAGU           | TTACATT<br>TTAGC         | 8 |
| hsa-miR-548a-5p | 107 | 8:0:1 | -11   | -10.51 | -0.48 | AAUUGC<br>GAGUUU<br>UACC<br>UUUGUU           | TTATTTT<br>ATACAA<br>CA  | 8 |
| hsa-miR-375     | 163 | 8:1:1 | -6.09 | -5.63  | -0.45 | CGUUCG<br>GCUCGC<br>GUGA<br>CAAAGC           | C GACTA<br>AGAAAC        | 8 |
| hsa-miR-518d-3p | 138 | 8:0:1 | -9    | -8.62  | -0.37 | GCUUCC<br>CUUUGG<br>AGC<br>UGAUUG            | GCGTTTT<br>TTT           | 8 |
| hsa-miR-508-3p  | 203 | 8:1:1 | -7.1  | -6.79  | -0.3  | UAGCCU<br>UUUGGA<br>GUAGA<br>UAAAGU          | TACCATT<br>ACAT          | 8 |
| hsa-miR-559     | 107 | 8:1:1 | -10.8 | -10.51 | -0.28 | AAUAU<br>GCACCA<br>AAA<br>AUGGAU             | TTATTTT<br>ATACAA<br>CAC | 8 |
| hsa-miR-1261    | 144 | 8:1:1 | -6.5  | -6.28  | -0.21 | AAGGCU<br>UUGGCU<br>U                        | TTTTCCA<br>TC            | 8 |

|                 |     |       |       |        |        |                                              |                          |   |
|-----------------|-----|-------|-------|--------|--------|----------------------------------------------|--------------------------|---|
| hsa-miR-518e    | 137 | 8:1:1 | -9.61 | -9.52  | -0.08  | CUCUAG<br>AGGGAA<br>GCGCUU<br>UCUG<br>UCCCUG | AGCGTTT<br>T             | 8 |
| hsa-miR-1259    | 151 | 8:1:0 | -6.24 | -6.21  | -0.029 | AGACCC<br>UUUAAC<br>CUGUGA<br>AAAUAU         | TCACATA<br>TAATACG       | 8 |
| hsa-miR-1277    | 86  | 8:1:1 | -10.9 | -10.87 | -0.023 | AUAUUAU<br>AUAUGU<br>ACGUUU<br>UCAAAU        | TATATGT<br>AT            | 8 |
| hsa-miR-105     | 138 | 8:1:1 | -8.6  | -8.62  | 0.027  | GCUCAG<br>ACUCCU<br>GUGGU<br>CUCUAG          | GCGTTTT<br>TTTC          | 8 |
| hsa-miR-518f    | 138 | 8:0:1 | -8.5  | -8.62  | 0.12   | AGGGAA<br>GCACUU<br>UCUC<br>UGAUUU           | GCGTTTT<br>TT            | 8 |
| hsa-miR-190b    | 50  | 8:1:1 | -9.31 | -9.51  | 0.2    | GUUUGA<br>UAUUGG<br>GUU<br>CAAAGC            | ATATATA<br>TATA          | 8 |
| hsa-miR-518b    | 138 | 8:0:1 | -8.4  | -8.62  | 0.22   | GCUCCC<br>CUUUAG<br>AGGU<br>AUGGAG           | GCGTTTT<br>TTTCC         | 8 |
| hsa-miR-620     | 217 | 8:1:1 | -4.8  | -5.06  | 0.26   | AUAGAU<br>AUAGAA<br>AU<br>AAUAAU             | ATTACCA<br>CA            | 8 |
| hsa-miR-369-3p  | 104 | 8:0:0 | -11   | -11.26 | 0.26   | ACAUGG<br>UUGAUC<br>UUU<br>ACUUGU            | GTATTAT<br>TTTAT         | 8 |
| hsa-miR-643     | 155 | 8:1:1 | -5.73 | -6.07  | 0.34   | AUGCUA<br>GCUCAG<br>GUAG<br>CAGGGU           | ATATAAT<br>A             | 8 |
| hsa-miR-1178    | 198 | 8:1:1 | -7.1  | -7.47  | 0.37   | CAGCUG<br>AGCAUG<br>AGGUUG<br>CCUGUG         | GTGACT<br>ACC            | 8 |
| hsa-miR-656     | 212 | 8:1:1 | -5.1  | -5.48  | 0.38   | AGGUGU<br>UCA<br>AAAAGU<br>AAUUGC            | ATGATAT<br>T             | 8 |
| hsa-miR-548c-5p | 128 | 8:1:0 | -7.2  | -7.61  | 0.41   | GGUUUU<br>UGCC<br>AGGGCU<br>UAGCUG           | TTACATT<br>TTAGCG        | 8 |
| hsa-miR-27a     | 195 | 8:1:1 | -7    | -7.42  | 0.42   | CUUGUG<br>AGCA<br>AGAGCU<br>UAGCUG           | ATAGTG<br>ACTA           | 8 |
| hsa-miR-27b     | 195 | 8:1:1 | -7    | -7.42  | 0.42   | AUUGGU<br>GAAC<br>AUGGAG<br>AUAGAU           | ATAGTG<br>ACT            | 8 |
| hsa-miR-620     | 73  | 8:1:0 | -8.1  | -8.53  | 0.43   | AUAGAA<br>AU<br>UUGUGU<br>CAAUUU             | ATCTACA<br>TAAATAT<br>AT | 8 |
| hsa-miR-592     | 112 | 8:1:1 | -9.5  | -9.98  | 0.48   | GCGAUG<br>AUGU                               | TTATACA<br>ACACAT<br>C   | 8 |

|                 |     |       |       |        |      |                                             |                           |   |
|-----------------|-----|-------|-------|--------|------|---------------------------------------------|---------------------------|---|
| hsa-miR-511     | 169 | 8:1:1 | -5    | -5.6   | 0.6  | GUGUCU<br>UUUGCU<br>CUGCAG<br>UCA<br>UAGGCA | AGAAAC<br>AAAATA<br>A     | 8 |
| hsa-miR-34b     | 197 | 8:1:0 | -6.9  | -7.69  | 0.79 | GUGUCA<br>UUAGCU<br>GAUUG<br>CUAAUA         | AGTGAC<br>TACCA           | 8 |
| hsa-miR-633     | 204 | 8:1:0 | -3.6  | -4.51  | 0.91 | GUAUCU<br>ACCACA<br>AUA<br>GGUCGU           | ACCATTA<br>CATGATA<br>TT  | 8 |
| hsa-miR-489     | 214 | 8:1:1 | -4.2  | -5.14  | 0.94 | AUGUGU<br>GACGCC<br>AUUU<br>AAAAGU          | GATATTA<br>CCACAT<br>AAT  | 8 |
| hsa-miR-548i    | 128 | 8:1:0 | -6.67 | -7.61  | 0.94 | AAUUGC<br>GGAUUU<br>UGCC<br>CUUCUU          | TTACATT<br>TTA            | 8 |
| hsa-miR-578     | 186 | 8:1:0 | -4.64 | -5.68  | 1.04 | GUGCUC<br>UAGGAU<br>UGU<br>AGAGGU           | ACAACA<br>AA              | 8 |
| hsa-miR-655     | 103 | 8:0:0 | -10.2 | -11.31 | 1.11 | UAUCCG<br>UGUUAU<br>GUUC<br>AAAACG          | TGTATTA<br>TTTTATA<br>CA  | 8 |
| hsa-miR-553     | 137 | 8:1:1 | -8.4  | -9.52  | 1.12 | GUGAGA<br>UUUUGU<br>UUU<br>UGAUAU           | AGCGTTT<br>TTTT           | 8 |
| hsa-miR-190     | 50  | 8:1:1 | -8.3  | -9.51  | 1.21 | GUUUGA<br>UAUAUU<br>AGGU<br>CAAAAG          | ATATATA<br>TATATAT        | 8 |
| hsa-miR-548n    | 108 | 8:1:1 | -9.16 | -10.43 | 1.27 | UAAUUG<br>UGGAUU<br>UUGU<br>AACAUU          | TATTTTA<br>TACA           | 8 |
| hsa-miR-181d    | 99  | 8:1:0 | -10.1 | -11.37 | 1.27 | CAUUGU<br>UGUCGG<br>UGGGU<br>ACUCUU         | TGCATGT<br>ATT            | 8 |
| hsa-miR-130b    | 128 | 8:1:1 | -6.3  | -7.61  | 1.31 | UCCCUG<br>UUGCAC<br>UAC<br>AAAAGU           | TTACATT<br>T              | 8 |
| hsa-miR-548c-5p | 107 | 8:0:1 | -9.2  | -10.51 | 1.31 | AAUUGC<br>GGUUUU<br>UGCC<br>AAAACG          | TTATTTT<br>ATACA          | 8 |
| hsa-miR-553     | 123 | 8:1:1 | -6.5  | -7.82  | 1.32 | GUGAGA<br>UUUUGU<br>UUU<br>UGUAAA           | ATCGATT<br>AC             | 8 |
| hsa-miR-30a     | 26  | 8:1:1 | -4.3  | -5.85  | 1.55 | CAUCCU<br>CGACUG<br>GAAG<br>UGUAAA          | TATTTAT<br>AAT            | 8 |
| hsa-miR-30d     | 26  | 8:1:1 | -4.3  | -5.85  | 1.55 | CAUCCC<br>CGACUG<br>GAAG<br>AGGUUG          | TATTTAT<br>AATATAT<br>ATA | 8 |
| hsa-miR-656     | 31  | 8:0:0 | -4.7  | -6.38  | 1.68 | CCUGUG<br>AGGUGU<br>UCA                     | ATAATAT<br>A              | 8 |

|                 |     |       |       |        |      |                                           |                          |   |
|-----------------|-----|-------|-------|--------|------|-------------------------------------------|--------------------------|---|
| hsa-miR-1290    | 70  | 8:1:1 | -7.3  | -9.02  | 1.72 | UGGAUU<br>UUUGGA<br>UCAGGG<br>A<br>UGAUAU | AATATCT<br>AC            | 8 |
| hsa-miR-190     | 119 | 8:1:0 | -7    | -8.76  | 1.76 | GUUUGA<br>UAUAAU<br>AGGU<br>AAAGGU        | ACACAT<br>CGA            | 8 |
| hsa-miR-570     | 142 | 8:1:1 | -5.5  | -7.35  | 1.85 | AAUUGC<br>AGUUUU<br>UCCC<br>AAAAGU        | TTTTTTC<br>CAT           | 8 |
| hsa-miR-548i    | 107 | 8:0:1 | -8.6  | -10.51 | 1.91 | AAUUGC<br>GGUUUU<br>UGCC<br>CUAGGU        | TTATTTT<br>ATA           | 8 |
| hsa-miR-331-5p  | 71  | 8:1:1 | -6.9  | -9.08  | 2.18 | AUGGUC<br>CCAGGG<br>AUCC<br>AGGUUG        | ATATCTA<br>CATAAAT       | 8 |
| hsa-miR-656     | 157 | 8:1:0 | -3.5  | -5.7   | 2.2  | CCUGUG<br>AGGUGU<br>UCA<br>GUGAGG         | ATAATAC<br>GACTAA<br>GA  | 8 |
| hsa-miR-1224-5p | 63  | 8:1:1 | -6.2  | -8.4   | 2.2  | ACUCGG<br>GAGGUG<br>G<br>UGGUUG           | TTCTTCA<br>AA            | 8 |
| hsa-miR-380     | 127 | 8:1:0 | -6.1  | -8.33  | 2.23 | ACCAUA<br>GAACAU<br>GCGC<br>CUCUAG        | ATTACAT<br>TT            | 8 |
| hsa-miR-523     | 138 | 8:1:1 | -6.21 | -8.62  | 2.41 | AGGGAA<br>GCGCUU<br>UCUG<br>AGAAGG        | GCGTTTT<br>TTCCAT<br>CAC | 8 |
| hsa-miR-1252    | 62  | 8:1:1 | -6.6  | -9.06  | 2.46 | AAAUUG<br>AAUUCA<br>UUUA<br>CUUAUG        | ATTCTTC<br>AAATA         | 8 |
| hsa-miR-491-3p  | 209 | 8:1:1 | -3.07 | -5.57  | 2.5  | CAAGAU<br>UCCCUU<br>CUAC<br>AUGUAU        | TACATGA<br>TATT          | 8 |
| hsa-miR-568     | 56  | 8:1:1 | -7.1  | -9.63  | 2.53 | AAAUGU<br>AUACAC<br>AC<br>UGAUAU          | ATATATA<br>TTCTTCA<br>A  | 8 |
| hsa-miR-190b    | 119 | 8:1:0 | -6.2  | -8.76  | 2.56 | GUUUGA<br>UAUUGG<br>GUU<br>UGCAAA         | ACACAT<br>CGATTA         | 8 |
| hsa-miR-548g    | 130 | 8:1:0 | -7.3  | -9.98  | 2.68 | AGUAAU<br>UGCAGU<br>UUUUG<br>UGCACC       | ACATTTT<br>AGCGTTT       | 8 |
| hsa-miR-768-5p  | 65  | 8:1:1 | -5.4  | -8.11  | 2.71 | AUGGUU<br>GUCUGA<br>GCAUG<br>AGGUUG       | CTTCAAA<br>TATCTAC       | 8 |
| hsa-miR-656     | 20  | 8:1:1 | -0.8  | -3.6   | 2.8  | CCUGUG<br>AGGUGU<br>UCA<br>UUGUGC         | GTCATAT<br>ATTTATA<br>A  | 8 |
| hsa-miR-218     | 191 | 8:1:1 | -4.4  | -7.27  | 2.87 | UUGAUC<br>UAACCA<br>UGU                   | AAACAT<br>AG             | 8 |

|                 |     |       |       |        |      |                                       |                           |   |
|-----------------|-----|-------|-------|--------|------|---------------------------------------|---------------------------|---|
| hsa-miR-380     | 33  | 8:1:1 | -3.6  | -6.52  | 2.92 | UGGUUG<br>ACCAUA<br>GAACAU<br>GCGC    | AATATAT<br>ATAAATT<br>AAA | 8 |
| hsa-miR-1206    | 97  | 8:1:1 | -8.3  | -11.23 | 2.93 | UGUUCA<br>UGUAGA<br>UGUUUA<br>AGC     | CATGCAT<br>GTAT           | 8 |
| hsa-miR-548b-5p | 107 | 8:0:1 | -7.56 | -10.51 | 2.95 | AAAAGU<br>AAUUGU<br>GGUUUU<br>GGCC    | TTATTTT<br>ATACAA<br>C    | 8 |
| hsa-miR-568     | 36  | 8:1:1 | -3.5  | -6.46  | 2.96 | AUGUAU<br>AAAUGU<br>AUACAC<br>AC      | ATATATA<br>AA             | 8 |
| hsa-miR-374b    | 105 | 8:1:0 | -8.2  | -11.17 | 2.97 | AUAUAA<br>UACAAC<br>CUGCUA<br>AGUG    | TATTATT<br>TTA            | 8 |
| hsa-miR-1308    | 98  | 8:1:1 | -8.3  | -11.35 | 3.05 | UUCACA<br>UUGUGC<br>UACUGU<br>CUGC    | ATGCAT<br>GTATTAT<br>T    | 8 |
| hsa-miR-517b    | 98  | 8:1:1 | -8    | -11.35 | 3.35 | CCUCUA<br>GAUGGA<br>AGCACU<br>GUCU    | ATGCAT<br>GTATTAT<br>TTT  | 8 |
| hsa-miR-643     | 114 | 8:1:1 | -6.6  | -9.96  | 3.36 | ACUUGU<br>AUGCUA<br>GCUCAG<br>GUAG    | ATACAA<br>CACATC<br>GATTA | 8 |
| hsa-miR-517a    | 99  | 8:1:1 | -8    | -11.37 | 3.37 | CCUCUA<br>GAUGGA<br>AGCACU<br>GUCU    | TGCATGT<br>A              | 8 |
| hsa-miR-517c    | 99  | 8:1:1 | -8    | -11.37 | 3.37 | CCUCUA<br>GAUGGA<br>AGCACU<br>GUCU    | TGCATGT<br>ATT            | 8 |
| hsa-miR-1259    | 32  | 8:1:0 | -3    | -6.52  | 3.52 | UCCCCUG<br>AGACCC<br>UUUAAC<br>CUGUGA | TAATATA<br>TAT            | 8 |
| hsa-miR-548h    | 107 | 8:0:1 | -6.9  | -10.51 | 3.61 | AAAAGU<br>AAUCGC<br>GGUUUU<br>UGUC    | TTATTTT<br>AT             | 8 |
| hsa-miR-643     | 98  | 8:1:1 | -7.7  | -11.35 | 3.65 | ACUUGU<br>AUGCUA<br>GCUCAG<br>GUAG    | ATGCAT<br>GTATT           | 8 |
| hsa-miR-548j    | 107 | 8:0:1 | -6.8  | -10.51 | 3.71 | AAAAGU<br>AAUUGC<br>GGUCUU<br>UGGU    | TTATTTT<br>AT             | 8 |
| hsa-miR-548k    | 107 | 8:1:1 | -6.8  | -10.51 | 3.71 | AAAAGU<br>ACUUGC<br>GGUUUU<br>UGCU    | TTATTTT<br>ATACAA<br>CACA | 8 |
| hsa-miR-548d-5p | 107 | 8:0:1 | -6.76 | -10.51 | 3.75 | AAAAGU<br>AAUUGU<br>GGUUUU<br>UGCC    | TTATTTT<br>ATACAA         | 8 |
| hsa-miR-1259    | 34  | 8:1:1 | -2.7  | -6.49  | 3.79 | UCCCCUG<br>AGACCC<br>UUUAAC<br>CUGUGA | ATATATA<br>TAAATTA<br>AAA | 8 |

|                 |     |       |       |        |      |                                           |                           |   |
|-----------------|-----|-------|-------|--------|------|-------------------------------------------|---------------------------|---|
| hsa-miR-203     | 131 | 8:0:1 | -6.4  | -10.21 | 3.81 | AGUGGU<br>UCUUAA<br>CAGUUC<br>AACAGU<br>U | CATTTTA<br>GCGT           | 8 |
| hsa-miR-633     | 214 | 8:1:1 | -1.2  | -5.14  | 3.94 | CUAAUA<br>GUAUCU<br>ACCACA<br>AUAAA       | GATATTA<br>CCACAT<br>AA   | 8 |
| hsa-miR-142-5p  | 109 | 8:0:1 | -6.3  | -10.25 | 3.95 | CAUAAA<br>GUAGAA<br>AGCACU<br>ACU         | ATTTTAT<br>ACA            | 8 |
| hsa-miR-548l    | 107 | 8:1:1 | -6.5  | -10.51 | 4.01 | AAAAGU<br>AUUUGC<br>GGUUU<br>UGUC         | TTATTTT<br>ATACAA<br>C    | 8 |
| hsa-miR-190b    | 83  | 8:1:1 | -7.2  | -11.24 | 4.04 | UGAUAU<br>GUUUGA<br>UAUUGG<br>GUU         | ATATATA<br>TGTATAA<br>CA  | 8 |
| hsa-miR-301b    | 128 | 8:1:1 | -3.5  | -7.61  | 4.11 | GCUCUG<br>ACGAGG<br>UUGCAC<br>UACU        | TTACATT<br>T              | 8 |
| hsa-miR-297     | 77  | 8:1:1 | -5    | -9.12  | 4.12 | AUGUAU<br>GUGUGC<br>AUGUGC<br>AUG         | ACATAA<br>ATA             | 8 |
| hsa-miR-567     | 95  | 8:1:1 | -7.4  | -11.57 | 4.17 | AGUAUG<br>UUCUUC<br>CAGGAC<br>AGAAC       | AACATG<br>CA              | 8 |
| hsa-miR-655     | 90  | 8:1:0 | -5.8  | -10    | 4.2  | AGAGGU<br>UAUCCG<br>UGUUAU<br>GUUC        | TGTATAA<br>CAT            | 8 |
| hsa-miR-301a    | 128 | 8:1:1 | -3.4  | -7.61  | 4.21 | GCUCUG<br>ACUUUA<br>UUGCAC<br>UACU        | TTACATT<br>TTAGCGT        | 8 |
| hsa-miR-656     | 93  | 8:1:0 | -5.7  | -9.94  | 4.24 | AGGUUG<br>CCUGUG<br>AGGUGU<br>UCA         | ATAACAT<br>GCATGT<br>A    | 8 |
| hsa-miR-202     | 62  | 8:1:1 | -4.8  | -9.06  | 4.26 | UUCCUA<br>UGCAUA<br>UACUUC<br>UUUG        | ATTCTTC<br>A              | 8 |
| hsa-miR-519c-3p | 99  | 8:1:1 | -7.05 | -11.37 | 4.32 | AAAGUG<br>CAUCUU<br>UUUAGA<br>GGAU        | TGCATGT<br>ATTATTT<br>TA  | 8 |
| hsa-miR-491-3p  | 90  | 8:1:1 | -5.5  | -10    | 4.5  | CUUAUG<br>CAAGAU<br>UCCCUU<br>CUAC        | TGTATAA<br>CATGCAT<br>GTA | 8 |
| hsa-miR-144     | 60  | 8:1:1 | -4.7  | -9.22  | 4.52 | GGAUUA<br>CAUCAU<br>AUACUG<br>UAAG        | ATATTCT<br>T              | 8 |
| hsa-miR-30c     | 26  | 8:1:1 | -1.3  | -5.85  | 4.55 | UGUAAA<br>CAUCCU<br>ACACUC<br>UCAGC       | TATTTAT<br>AATATAT<br>A   | 8 |
| hsa-miR-30b     | 26  | 8:1:1 | -1.3  | -5.85  | 4.55 | UGUAAA<br>CAUCCU<br>ACACUC<br>AGCU        | TATTTAT<br>AATATA         | 8 |

|                 |     |       |       |        |      |                                                |                           |   |
|-----------------|-----|-------|-------|--------|------|------------------------------------------------|---------------------------|---|
| hsa-miR-454     | 128 | 8:1:1 | -2.9  | -7.61  | 4.71 | ACCCUA<br>UCAUA<br>UUGUCU<br>CUGC              | TTACATT<br>TT             | 8 |
| hsa-miR-1259    | 110 | 8:1:1 | -5.4  | -10.15 | 4.75 | UCCCUG<br>AGACCC<br>UUUAAC<br>CUGUGA<br>UUUAUA | TTTTATA<br>CAACAC<br>A    | 8 |
| hsa-miR-374a    | 105 | 8:1:0 | -6.3  | -11.17 | 4.87 | UACAAC<br>CUGAUA<br>AGUG<br>AUGUAU             | TATTATT<br>TTA            | 8 |
| hsa-miR-568     | 54  | 8:1:1 | -4.7  | -9.62  | 4.92 | AAAUGU<br>AUACAC<br>AC                         | ATATATA<br>TAT            | 8 |
| hsa-miR-181b    | 99  | 8:1:0 | -6.43 | -11.37 | 4.94 | AACAUU<br>CAUUGC<br>UGUCGG<br>UGGGU            | TGCATGT<br>ATTATTT<br>TAT | 8 |
| hsa-miR-519b-3p | 99  | 8:1:1 | -6.4  | -11.37 | 4.97 | AAAGUG<br>CAUCCU<br>UUUAGA<br>GGUU             | TGCATGT<br>ATTATTT<br>T   | 8 |
| hsa-miR-519a    | 99  | 8:1:1 | -6.4  | -11.37 | 4.97 | CUCUAG<br>AGGGAA<br>GCGCUU<br>UCUG<br>UGAUAU   | TGCATGT<br>ATT            | 8 |
| hsa-miR-190     | 83  | 8:1:1 | -6.1  | -11.24 | 5.14 | GUUUGA<br>UAUAUU<br>AGGU<br>UGGUUG             | ATATATA<br>TGTATAA        | 8 |
| hsa-miR-380     | 31  | 8:1:1 | -0.9  | -6.38  | 5.48 | ACCAUA<br>GAACAU<br>GCGC<br>UUCACA             | ATAATAT<br>AT             | 8 |
| hsa-miR-130a    | 128 | 8:1:1 | -2.1  | -7.61  | 5.51 | UUGUGC<br>UACUGU<br>CUGC                       | TTACATT<br>TTA            | 8 |
| hsa-miR-1297    | 108 | 8:1:1 | -4.8  | -10.43 | 5.63 | UUCAAG<br>UAAUUC<br>AGGUG<br>UGGUUG            | TATTTTA<br>TAC            | 8 |
| hsa-miR-380     | 93  | 8:1:0 | -4.2  | -9.94  | 5.74 | ACCAUA<br>GAACAU<br>GCGC<br>UAGGUA             | ATAACAT<br>GCAT           | 8 |
| hsa-miR-196a    | 70  | 8:1:1 | -3.2  | -9.02  | 5.82 | GUUUCA<br>UGUUGU<br>UGGG                       | AATATCT<br>ACATAA<br>A    | 8 |
| hsa-miR-196b    | 70  | 8:1:1 | -3.2  | -9.02  | 5.82 | UAGGUA<br>GUUUC<br>UGUUGU<br>UGGG              | AATATCT<br>ACATAA         | 8 |
| hsa-miR-26a     | 108 | 8:1:1 | -4.4  | -10.43 | 6.03 | UUCAAG<br>JAAUCC<br>AGGAUA<br>GGCU             | TATTTTA<br>TACAA          | 8 |
| hsa-miR-139-5p  | 132 | 8:1:1 | -4.37 | -10.43 | 6.06 | UCUACA<br>GUGCAC<br>GUGUCU<br>CCAGU            | ATTTTAG<br>CGTTTTT<br>TT  | 8 |
| hsa-miR-340     | 110 | 8:1:1 | -4    | -10.15 | 6.15 | UUUAUA<br>AGCAAU<br>GAGACU<br>GAUU             | TTTTATA<br>CAACAC<br>ATCG | 8 |

|                |     |       |       |        |      |                                               |                           |   |
|----------------|-----|-------|-------|--------|------|-----------------------------------------------|---------------------------|---|
| hsa-miR-599    | 113 | 8:1:1 | -3.5  | -9.98  | 6.48 | GUUGUG<br>UCAGUU<br>UAUCAA<br>AC              | TATACAA<br>CACA           | 8 |
| hsa-miR-26b    | 108 | 8:1:1 | -3.9  | -10.43 | 6.53 | UUCAAG<br>JAAUUC<br>AGGAUA<br>GGU             | TATTTTA<br>TACAAC<br>AC   | 8 |
| hsa-miR-584    | 48  | 8:1:1 | -2.61 | -9.26  | 6.65 | UUAUGG<br>UUUGCC<br>UGGGAC<br>UGAG            | AAATATA<br>TATATAT        | 8 |
| hsa-miR-568    | 52  | 8:1:1 | -3    | -9.74  | 6.74 | AUGUAU<br>AAAUGU<br>AUACAC<br>AC              | ATATATA<br>TATA           | 8 |
| hsa-miR-1259   | 50  | 8:1:1 | -2.7  | -9.51  | 6.81 | UCCUG<br>AGACCC<br>UUUAAC<br>CUGUGA<br>CAUCUU | ATATATA<br>TAT            | 8 |
| hsa-miR-200b   | 105 | 8:1:1 | -4.3  | -11.17 | 6.87 | ACUGGG<br>CAGCAU<br>UGGA<br>GUGGUU            | TATTATT<br>TTATA          | 8 |
| hsa-miR-487b   | 104 | 8:1:1 | -4.3  | -11.26 | 6.96 | AUCCCU<br>GUCCUG<br>UUCG<br>CGUCUU            | GTATTAT<br>TTTA           | 8 |
| hsa-miR-200c   | 105 | 8:1:1 | -4.1  | -11.17 | 7.07 | ACCCAG<br>CAGUGU<br>UUGG<br>GUGGUU            | TATTATT<br>TT             | 8 |
| hsa-miR-487a   | 104 | 8:1:0 | -4    | -11.26 | 7.26 | AUCCCU<br>GCUGUG<br>UUCG<br>AUUCUG            | GTATTAT<br>TTTATAC<br>AAC | 8 |
| hsa-miR-544    | 90  | 8:1:1 | -2.7  | -10    | 7.3  | CAUUUU<br>UAGCAA<br>GUUC<br>AUGGAU            | TGTATAA<br>CATG           | 8 |
| hsa-miR-1261   | 112 | 8:1:1 | -2.62 | -9.98  | 7.36 | AAGGCU<br>UUGGCU<br>U<br>UGGUUG               | TTATACA<br>ACACAT<br>CGAT | 8 |
| hsa-miR-380    | 106 | 8:1:1 | -3.5  | -10.9  | 7.4  | ACCAUA<br>GAACAU<br>GCGC<br>CUAAUA            | ATTATTT<br>TATAC          | 8 |
| hsa-miR-633    | 106 | 8:1:1 | -3.5  | -10.9  | 7.4  | GUAUCU<br>ACCACA<br>AUAAA<br>AUUCUA           | ATTATTT<br>TA             | 8 |
| hsa-miR-576-5p | 44  | 8:1:0 | -1.2  | -8.77  | 7.57 | AUUUCU<br>CCACGU<br>CUUU<br>UAGAUA            | ATTAAAA<br>T              | 8 |
| hsa-miR-577    | 106 | 8:1:1 | -3.2  | -10.9  | 7.7  | AAUAU<br>UGGUAC<br>CUG<br>AGGUUG              | ATTATTT<br>TATA           | 8 |
| hsa-miR-656    | 47  | 8:1:0 | -1.3  | -9.12  | 7.82 | CCUGUG<br>AGGUGU<br>UCA<br>AUCAAG             | AAAATAT<br>A              | 8 |
| hsa-miR-561    | 130 | 8:1:1 | -2.1  | -9.98  | 7.88 | GAUCUU<br>AAACUU<br>UGCC                      | ACATTTT<br>AGCG           | 8 |

|              |     |       |      |        |       |                                            |                    |   |
|--------------|-----|-------|------|--------|-------|--------------------------------------------|--------------------|---|
| hsa-miR-511  | 48  | 8:1:1 | -0.8 | -9.26  | 8.46  | GUGUCU<br>UUUGCU<br>CUGCAG<br>UCA<br>UCCUG | AAATATA<br>TATA    | 8 |
| hsa-miR-1259 | 83  | 8:1:1 | -2.7 | -11.24 | 8.54  | AGACCC<br>UUUAAC<br>CUGUGA<br>AAUGGA       | ATATATA<br>TGTATA  | 8 |
| hsa-miR-1246 | 82  | 8:1:1 | -2.4 | -11.25 | 8.85  | UUUUUG<br>GAGCAG<br>G<br>AAUGGA            | AATATAT<br>ATGTATA | 8 |
| hsa-miR-1246 | 49  | 8:1:1 | -0.4 | -9.27  | 8.87  | UUUUUG<br>GAGCAG<br>G<br>UGGUUG            | AATATAT<br>A       | 8 |
| hsa-miR-380  | 109 | 8:1:1 | -0.3 | -10.25 | 9.95  | ACCAUA<br>GAACAU<br>GCGC<br>AGGUUG         | ATTTTAT<br>ACAAC   | 8 |
| hsa-miR-656  | 104 | 8:1:1 | -1   | -11.26 | 10.26 | CCUGUG<br>AGGUGU<br>UCA                    | GTATTAT<br>TTTATA  | 8 |

Seq ID length Squence  
3'UTR of 1291  
var  
group A

CGGATGTATGGAATATATAAGAAAAAAAAAATATATTATTTACTTGTATTTTTTTTTTTTTTTTTTTTT  
GTTATTTTTATTTGTATATTCATTTGTATAAATAAATATATATATTCATAGTATATATATTTTTATTT  
TGATATATTTGTATAATAATATTTGTATATATATATAAATTTGTTTTTTGGCTTTTATATAATATTT  
GTAAATATATATATATATAAATTTGTTTTTTGTTTTGTATAATATTTCTAAATATATTCGATTCATAA  
TTTTTGAGTAATATTTTTATTTTTTTTCATTTATTTTTGATTTTTTTTTAAATGTCATTGTTCAATAAT  
TAATATATAATTTTTATTTGTTTGTATAAATATAAATTCGTTTTATTTGTTTCTATTTGACACATGT  
GATTATTTGTATATAAATTTGTTTTATTTGTATAAATATAATATATATATGTTTTATTTGTTTATTTGAC  
CATTTGATTATTTGTATATATATTTTTGTTGAATTTTTTTAATTTGTTTTGGATATTTGTATATATA  
ATTTGTTTTATTTGTATAATATGTATGTGATTAATAGAAAAAAAAAGAAAAAAAAATAGAAAAATAT  
ACCATACCATATAAATTATATTCATAGTAGTATATTATATGGTTCCATATTAATAAGCTAATATAAT  
ACACTAAAATATTTCTTATTATATATATATATATATTTAATATAGTAACAACGAAAATGTTTTCAAC  
ACCATATACGGATATATCAACACATTATAATATAATAAATGAATTAATCTAATCTTACAATAAGTA  
TTATTATAAAAATAGTAACAATGTAATATATCATATATAAATTTGATTGGAAATAACAATTTTATATG  
ATATCCTTTTTTTTTTTTTTTTTTTTTTTGTTTACTATCATCAATATAGGAAATAAATTTCTT  
TTAAGAAAATATGAAGAATTTTTTTTT*AACGC77C*TAATTACGTATAAAAATAAAAATAAATGATTCCTT  
GTTTTCCATAGTATATAATGTCGCGTTATTTGTTTATTGTATAAATAATATTTTATTAATAATGTA  
GTAATTAATTTTGTACAACATGTAATAATAAATAAATGATCATAAGTTGAAAATACCATAAC  
TTCTATTTAAGAAAATATATATAATAACACGTTATGATTATAATATTTGAATAACATAAAAACA  
ATAGAATGTATTATGTAATAGTA  
Note: the target sites are shown in italic

Target Prediction:

| microRN<br>A | Position<br>in UTR | Seed  | dGduplex | dGopen | ddG    | Seq                                                   | Target<br>site    | Num of<br>Matches | Mutated<br>seq | Mutation<br>primers                                                                                                               |
|--------------|--------------------|-------|----------|--------|--------|-------------------------------------------------------|-------------------|-------------------|----------------|-----------------------------------------------------------------------------------------------------------------------------------|
| hsa-miR-451  | 1017               | 8:1:0 | -3.6     | -11.27 | 7.67   | AAACCG<br>UUACCA<br>UUACUG<br>AGUU                    | AACGCTT<br>C      | 8                 | TTATATT<br>A   | Up:AAGA<br>AATATGA<br>AGAATTT<br>TTTTTTT<br>ATATTAT<br>AATTACG<br>TAT;Dow<br>n:TCATTT<br>ATTTTTA<br>TTTTATA<br>CGTAATT<br>ATAATAT |
| hsa-miR-297  | 954                | 8:1:1 | -15.1    | -1.75  | -13.34 | AUGUAU<br>GUGUGC<br>AUGUGC<br>AUG<br>GAUGAU<br>GAUGGC | TACATAC<br>TATCAT | 8                 |                |                                                                                                                                   |
| hsa-miR-1272 | 965                | 8:1:0 | -14.52   | -2.44  | -12.07 | AGCAA<br>UUCUGA<br>AA                                 | ATATAG<br>GAAA    | 8                 |                |                                                                                                                                   |

|                |      |       |        |        |        |                                               |                             |   |
|----------------|------|-------|--------|--------|--------|-----------------------------------------------|-----------------------------|---|
| hsa-miR-574-5p | 955  | 8:1:1 | -13.8  | -1.79  | -12    | UGAGUG<br>UGUGUG<br>UGUGAG<br>UGUGU<br>GAUGAU | ACATACT<br>ATCATCA<br>T     | 8 |
| hsa-miR-1272   | 962  | 8:0:0 | -12.2  | -1.64  | -10.55 | GAUGGC<br>AGCAA<br>UUCUGA<br>AA               | ATCATCA<br>TCA              | 8 |
| hsa-miR-574-5p | 801  | 8:1:1 | -17.3  | -7.31  | -9.98  | UGAGUG<br>UGUGUG<br>UGUGAG<br>UGUGU<br>UAUGUG | ACACATT<br>ATAAT            | 8 |
| hsa-miR-299-3p | 648  | 8:1:1 | -14.7  | -5.32  | -9.37  | GGAUGG<br>UAAACC<br>GCUU                      | TACCATA<br>TAA              | 8 |
| hsa-miR-1      | 270  | 8:1:1 | -12.4  | -4.8   | -7.59  | ACAUAC<br>UUCUUU<br>AUAUGC<br>CCAU            | TATATTC<br>GATTCAT<br>AA    | 8 |
| hsa-miR-620    | 961  | 8:1:1 | -9.3   | -1.73  | -7.56  | AUGGAG<br>AUAGAU<br>AUAGAA<br>AU              | TATCATC<br>ATCAATA<br>TAGG  | 8 |
| hsa-miR-103    | 1079 | 8:1:1 | -17.9  | -10.72 | -7.17  | UCAUAG<br>CCCUGU<br>ACAAUG<br>CUGCU           | AATGTC<br>GCGTTAT<br>TTG    | 8 |
| hsa-miR-206    | 270  | 8:1:1 | -11.9  | -4.8   | -7.09  | UGGAAU<br>GUAAGG<br>AAGUGU<br>GUGG            | TATATTC<br>GATTCAT<br>AAT   | 8 |
| hsa-miR-508-3p | 960  | 8:1:1 | -8.64  | -1.77  | -6.86  | UGAUUG<br>UAGCCU<br>UUUGGA<br>GUAGA           | CTATCAT<br>CATCAAT<br>ATA   | 8 |
| hsa-miR-539    | 722  | 8:1:1 | -13.9  | -7.05  | -6.84  | GGAGAA<br>AUUAUC<br>CUUGGU<br>GUGU            | TATTTCT<br>TATTA            | 8 |
| hsa-miR-206    | 660  | 8:1:1 | -14.4  | -7.77  | -6.62  | UGGAAU<br>GUAAGG<br>AAGUGU<br>GUGG            | TATATTC<br>ATAGTA<br>GTATAT | 8 |
| hsa-miR-337-3p | 972  | 8:0:0 | -13.3  | -7.33  | -5.96  | CUCCUA<br>UAUGAU<br>GCCUUU<br>CUUC            | ATATAG<br>GAAATA<br>AATTC   | 8 |
| hsa-miR-433    | 964  | 8:1:0 | -8.14  | -2.26  | -5.87  | UACGGU<br>GAGCCU<br>GUCAUU<br>AUUC            | CATCATC<br>AATATAG<br>GAA   | 8 |
| hsa-miR-433    | 961  | 8:1:1 | -7.4   | -1.73  | -5.66  | UACGGU<br>GAGCCU<br>GUCAUU<br>AUUC            | TATCATC<br>ATCAATA<br>TA    | 8 |
| hsa-miR-107    | 1079 | 8:1:1 | -16.36 | -10.72 | -5.63  | AGCAGC<br>AUUGUA<br>CAGGGC<br>UAUCA<br>AGGGU  | AATGTC<br>GCGT              | 8 |
| hsa-miR-608    | 644  | 8:1:1 | -11.4  | -5.82  | -5.57  | GGUGUU<br>GGGACA<br>GCUCCG<br>U               | ACCATA<br>CCATATA<br>AATT   | 8 |
| hsa-miR-221    | 868  | 8:1:1 | -12.5  | -7.2   | -5.29  | ACCUGG<br>CAUACA<br>AUGUAG<br>AUUU            | AATGTAA<br>TATATCA<br>T     | 8 |

|                 |     |       |        |        |       |                                                                      |   |
|-----------------|-----|-------|--------|--------|-------|----------------------------------------------------------------------|---|
| hsa-miR-206     | 954 | 8:1:1 | -6.98  | -1.75  | -5.22 | UGGAUU<br>GUAAGG TACATAC<br>AAGUGU TAT                               | 8 |
| hsa-miR-331-5p  | 952 | 8:1:0 | -9.1   | -4.02  | -5.07 | GUGG<br>CUAGGU<br>AUGGUC CATACAT<br>CCAGGG ACTATCA<br>AUCC<br>CAGGAU | 8 |
| hsa-miR-1265    | 918 | 8:1:1 | -16.3  | -11.29 | -5    | GUGGUC GATATCC<br>AAGUGU TTTTTT<br>UGUU                              | 8 |
| hsa-miR-648     | 954 | 8:1:1 | -6.6   | -1.75  | -4.84 | AAGUGU<br>GCAGGG TACATAC<br>CACUGG TAT<br>U                          | 8 |
| hsa-miR-888     | 288 | 8:0:0 | -14.7  | -9.96  | -4.73 | UACUCA<br>AAAAGC TTTTGAG<br>UGUCAG TAATATT<br>UCA                    | 8 |
| hsa-miR-190     | 800 | 8:1:1 | -10.8  | -6.33  | -4.46 | UGAUUU<br>GUUUUA AACACA<br>UAUAUU TTAT<br>AGGU                       | 8 |
| hsa-miR-1322    | 962 | 8:1:0 | -6.1   | -1.64  | -4.45 | GAUGAU<br>GCUGCU ATCATCA<br>GAUGCU TCAATA<br>G                       | 8 |
| hsa-miR-548h    | 433 | 8:1:1 | -13    | -8.63  | -4.36 | AAAAGU<br>AAUCGC ATTATTT<br>GGUUUU GTATATA<br>UGUC TAAAT             | 8 |
| hsa-miR-567     | 638 | 8:1:1 | -7.4   | -3.05  | -4.34 | AGUAUG<br>UUCUUC AAATATA<br>CAGGAC CCA<br>AGAAC                      | 8 |
| hsa-miR-539     | 983 | 8:1:1 | -12.61 | -8.33  | -4.27 | GGAGAA<br>AUUAUC AAATTCT<br>CUUGGU TTTT<br>GUGU                      | 8 |
| hsa-miR-1       | 954 | 8:1:1 | -5.95  | -1.75  | -4.19 | ACAUAC<br>UUCUUU TACATAC<br>AUAUGC TATCATC<br>CCAU ATC               | 8 |
| hsa-miR-592     | 421 | 8:0:0 | -12.3  | -8.3   | -3.99 | UUGUGU<br>CAUAUU TTGACAC<br>GCGAUG ATGTGAT<br>AUGU T                 | 8 |
| hsa-miR-1303    | 413 | 8:1:1 | -11.7  | -7.73  | -3.96 | UUUAGA<br>GACGGG GTTTCTA<br>GUCUUG TTTGACA<br>CUCU CATGT             | 8 |
| hsa-miR-548b-5p | 658 | 8:1:1 | -10.5  | -6.56  | -3.93 | AAAAGU<br>AAUUGU ATTATAT<br>GGUUUU TCAT<br>GGCC                      | 8 |
| hsa-miR-128     | 344 | 8:1:1 | -7.1   | -3.17  | -3.92 | CGGGGC<br>CGUAGC TCATTGT<br>ACUGUC TCAT<br>UGAGA                     | 8 |
| hsa-miR-548a-5p | 405 | 8:1:1 | -10.6  | -6.74  | -3.85 | AAAAGU<br>AAUUGC TTTATTTT<br>GAGUUU GTTTC<br>UACC                    | 8 |
| hsa-miR-297     | 950 | 8:1:1 | -11.3  | -7.46  | -3.83 | AUGUAU<br>GUGUGC TTCATAC<br>AUGUGC ATA<br>AUG                        | 8 |

|                |      |       |        |        |       |                                     |                             |   |
|----------------|------|-------|--------|--------|-------|-------------------------------------|-----------------------------|---|
| hsa-miR-495    | 379  | 8:1:0 | -8.7   | -4.88  | -3.81 | GAAGUU<br>GCCCAU<br>GUUAUU<br>UUCG  | TGTTTGT<br>ATAA             | 8 |
| hsa-miR-147    | 798  | 8:1:0 | -9.5   | -5.74  | -3.75 | GUGUGU<br>GGAAAU<br>GCUUCU<br>GC    | TCAACA<br>CATTATA<br>ATATA  | 8 |
| hsa-miR-499-5p | 368  | 8:1:1 | -8.3   | -4.91  | -3.38 | UUAAGA<br>CUUGCA<br>GUGAUG<br>UUU   | AATTTTT<br>ATT              | 8 |
| hsa-miR-548i   | 405  | 8:1:1 | -10.1  | -6.74  | -3.35 | AAAAGU<br>AAUUGC<br>GGUUUU<br>UGCC  | TTTATTTT<br>GTTTCTA<br>TTT  | 8 |
| hsa-miR-539    | 720  | 8:1:1 | -9.8   | -6.49  | -3.3  | GGAGAA<br>AUUAUC<br>CUUGGU<br>GUGU  | AATATTT<br>CTTATTA<br>TATAT | 8 |
| hsa-miR-934    | 1069 | 8:1:1 | -12.7  | -9.43  | -3.26 | UGUCUA<br>CUACUG<br>GAGACA<br>CUGG  | TAGTATA<br>TATAATG<br>TCGC  | 8 |
| hsa-miR-1256   | 338  | 8:1:1 | -6.4   | -3.15  | -3.24 | AGGCAU<br>UGACUU<br>CUCACU<br>AGCU  | TAAATGT<br>CATTGTT<br>CATAA | 8 |
| hsa-miR-183    | 340  | 8:1:1 | -6.32  | -3.11  | -3.2  | UAUGGC<br>ACUGGU<br>AGAAUU<br>CACU  | AATGTCA<br>TTGTTCA<br>TAATT | 8 |
| hsa-miR-486-5p | 971  | 8:1:1 | -9.6   | -6.46  | -3.13 | UCCUGU<br>ACUGAG<br>CUGCCC<br>CGAG  | AATATAG<br>GAAATA<br>AATTCT | 8 |
| hsa-miR-1322   | 959  | 8:1:1 | -4.9   | -1.77  | -3.12 | GAUGAU<br>GCUGCU<br>GAUGCU<br>G     | ACTATCA<br>TCATC            | 8 |
| hsa-miR-633    | 958  | 8:1:0 | -4.9   | -1.77  | -3.12 | CUAAUA<br>GUAUCU<br>ACCACA<br>AUAAA | TACTATC<br>ATCATCA<br>AT    | 8 |
| hsa-miR-33a    | 866  | 8:0:1 | -9.5   | -6.48  | -3.01 | GUGCAU<br>UGUAGU<br>UGCAUU<br>GCA   | ACAATGT<br>AATATAT<br>CAT   | 8 |
| hsa-miR-142-5p | 304  | 8:1:1 | -7     | -4.03  | -2.96 | CAUAAA<br>GUAGAA<br>AGCACU<br>ACU   | TATTTTTT<br>TTTCA           | 8 |
| hsa-miR-1262   | 950  | 8:1:1 | -10.35 | -7.46  | -2.88 | AUGGGU<br>GAUUUU<br>GUAGAA<br>GGAU  | TTCATAC<br>ATACTAT          | 8 |
| hsa-miR-221    | 1079 | 8:1:0 | -13.6  | -10.72 | -2.87 | ACCUGG<br>CAUACA<br>AUGUAG<br>AUUU  | AATGTC<br>GCGTTAT<br>TT     | 8 |
| hsa-miR-383    | 1234 | 8:1:1 | -11.3  | -8.46  | -2.83 | AGAUCA<br>GAAGGU<br>GAUUGU<br>GGCU  | TTATGAT<br>TATAATA<br>TATTT | 8 |
| hsa-miR-656    | 385  | 8:0:0 | -11.5  | -8.69  | -2.8  | AGGUUG<br>CCUGUG<br>AGGUGU<br>UCA   | TATAATA<br>TATAT            | 8 |

|                 |      |       |        |        |       |                                          |                             |   |
|-----------------|------|-------|--------|--------|-------|------------------------------------------|-----------------------------|---|
| hsa-miR-548n    | 373  | 8:1:1 | -7.59  | -4.8   | -2.78 | CAAAAG<br>UAAUUG<br>UGGAUU<br>UUGU       | TTATTTT<br>GTTTGTA<br>TAAT  | 8 |
| hsa-miR-1265    | 802  | 8:1:1 | -10.2  | -7.44  | -2.75 | CAGGAU<br>GUGGUC<br>AAGUGU<br>UGUU       | CACATTA<br>TAATATA<br>AT    | 8 |
| hsa-miR-1265    | 954  | 8:1:1 | -4.5   | -1.75  | -2.74 | CAGGAU<br>GUGGUC<br>AAGUGU<br>UGUU       | TACATAC<br>TATCATC<br>ATCA  | 8 |
| hsa-miR-1302    | 1080 | 8:1:1 | -13.6  | -10.86 | -2.73 | UUGGGA<br>CAUACU<br>UAUGCU<br>AAA        | ATGTCGC<br>GTTATTT<br>GT    | 8 |
| hsa-miR-599     | 422  | 8:1:0 | -11    | -8.26  | -2.73 | GUUGUG<br>UCAGUU<br>UAUCAA<br>AC         | TGACAC<br>ATGTGAT<br>T      | 8 |
| hsa-miR-1826    | 965  | 8:1:0 | -5.09  | -2.44  | -2.64 | UUUGGC<br>AAUGGU<br>AGAACU<br>CACACU     | ATCATCA<br>ATATAG<br>G      | 8 |
| hsa-miR-574-5p  | 711  | 8:1:1 | -12.8  | -10.15 | -2.64 | UGAGUG<br>UGUGUG<br>UGUGAG<br>UGUGU      | ATACACT<br>AAAA             | 8 |
| hsa-miR-380     | 34   | 8:1:1 | -10.55 | -7.92  | -2.62 | UGGUUG<br>ACCAUA<br>GAACAU<br>GCGC       | TATTATT<br>TTACTTG<br>TTTAT | 8 |
| hsa-miR-450b-3p | 1051 | 8:1:1 | -11.5  | -9     | -2.49 | UUGGGA<br>UCAUUU<br>UGCAUC<br>CAUA       | TGATTCC<br>TTGTTTT          | 8 |
| hsa-miR-875-3p  | 773  | 8:1:1 | -12    | -9.5   | -2.49 | CCUGGA<br>AACACU<br>GAGGUU<br>GUG        | GTTTTCA<br>ACACCA           | 8 |
| hsa-miR-548j    | 433  | 8:1:1 | -11.1  | -8.63  | -2.46 | AAAAGU<br>AAUUGC<br>GGUCUU<br>UGGU       | ATTATTT<br>GTATA            | 8 |
| hsa-miR-1270    | 1061 | 8:1:1 | -11.05 | -8.6   | -2.44 | CUGGAG<br>AUAUGG<br>AAGAGC<br>UGUGU      | TTTTTCC<br>ATA              | 8 |
| hsa-miR-33b     | 866  | 8:1:1 | -8.8   | -6.48  | -2.31 | GUGCAU<br>UGCUGU<br>UGCAUU<br>GC         | ACAATGT<br>AATATAT<br>CATAT | 8 |
| hsa-miR-524-5p  | 379  | 8:1:1 | -7.2   | -4.88  | -2.31 | CUACAA<br>AGGGAA<br>GCACUU<br>UCUC       | TGTTTGT<br>ATAATA           | 8 |
| hsa-miR-520d-5p | 379  | 8:1:1 | -7.2   | -4.88  | -2.31 | CUACAA<br>AGGGAA<br>GCCCUU<br>UC         | TGTTTGT<br>ATAATAT<br>A     | 8 |
| hsa-miR-203     | 721  | 8:1:1 | -9.01  | -6.71  | -2.29 | AGUGGU<br>UCUUA<br>CAGUUC<br>AACAGU<br>U | ATATTTT<br>TTATT            | 8 |
| hsa-miR-584     | 647  | 8:1:0 | -7.5   | -5.22  | -2.27 | UUAUGG<br>UUUGCC<br>UGGGAC<br>UGAG       | ATACCAT<br>ATAAA            | 8 |

|                 |      |       |       |        |       |                                               |                             |   |
|-----------------|------|-------|-------|--------|-------|-----------------------------------------------|-----------------------------|---|
| hsa-miR-643     | 651  | 8:1:1 | -8.1  | -5.85  | -2.24 | ACUUGU<br>AUGCUA<br>GCUCAG<br>GUAG<br>GAUGAU  | CATATAA<br>ATTATAT          | 8 |
| hsa-miR-1272    | 959  | 8:1:1 | -4    | -1.77  | -2.22 | GAUGGC<br>AGCAAA<br>UUCUGA<br>AA<br>UAUGCA    | ACTATCA<br>TCATCAA<br>T     | 8 |
| hsa-miR-586     | 867  | 8:1:1 | -8.9  | -6.68  | -2.21 | UUGUAU<br>UUUUAG<br>GUCC                      | CAATGTA<br>ATATATC          | 8 |
| hsa-miR-548b-5p | 372  | 8:1:1 | -7.09 | -4.99  | -2.09 | AAAAGU<br>AAUUGU<br>GGUUUU<br>GGCC            | TTTATTTT<br>GTTTGTA<br>T    | 8 |
| hsa-miR-1270    | 961  | 8:1:1 | -3.8  | -1.73  | -2.06 | CUGGAG<br>AUAUGG<br>AAGAGC<br>UGUGU<br>UGAUAU | TATCATC<br>ATCAATA<br>T     | 8 |
| hsa-miR-190b    | 800  | 8:1:1 | -8.4  | -6.33  | -2.06 | GUUUGA<br>UAUUGG<br>GUU                       | AACACA<br>TTATAA            | 8 |
| hsa-miR-208a    | 401  | 8:0:1 | -8.7  | -6.63  | -2.06 | GAGCUU<br>UUGGCC<br>CGGGUU<br>AUAC            | TCGTTTT<br>ATTTTGT<br>TTCTA | 8 |
| hsa-miR-26a     | 434  | 8:1:1 | -11.5 | -9.45  | -2.04 | UUCAAG<br>UAAUCC<br>AGGAUA<br>GGCU            | TTATTTG<br>TATATAT<br>A     | 8 |
| hsa-miR-208b    | 401  | 8:0:1 | -8.6  | -6.63  | -1.96 | AAGCUU<br>UUUGCU<br>CGAAUU<br>AUGU            | TCGTTTT<br>ATTTTGT<br>T     | 8 |
| hsa-miR-186     | 984  | 8:0:0 | -10.5 | -8.54  | -1.95 | CAAAGA<br>AUUCUC<br>CUUUUG<br>GGCU            | AATTCTT<br>TTT              | 8 |
| hsa-miR-383     | 725  | 8:1:1 | -9.51 | -7.59  | -1.91 | AGAUCA<br>GAAGGU<br>GAUUGU<br>GGCU            | TTCTTAT<br>TATATAT<br>AT    | 8 |
| hsa-miR-200c    | 670  | 8:1:1 | -12.8 | -11.06 | -1.73 | CGUCUU<br>ACCCAG<br>CAGUGU<br>UUGG            | GTAGTAT<br>ATTAT            | 8 |
| hsa-miR-944     | 351  | 8:1:1 | -5.4  | -3.77  | -1.62 | AAAUUA<br>UUGUAC<br>AUCGGA<br>UGAG            | TCATAAT<br>TTAATA<br>TAT    | 8 |
| hsa-miR-190     | 720  | 8:1:1 | -8.1  | -6.49  | -1.6  | UGAUAU<br>GUUUGA<br>UAUAUU<br>AGGU            | AATATTT<br>CTTATTA<br>TAT   | 8 |
| hsa-miR-548n    | 303  | 8:0:1 | -6.72 | -5.12  | -1.59 | CAAAAG<br>UAAUUG<br>UGGAUU<br>UUGU            | TTATTTT<br>TTTTCAT<br>TTT   | 8 |
| hsa-miR-369-3p  | 1274 | 8:0:0 | -11.6 | -10.03 | -1.56 | AAUAAU<br>ACAUGG<br>UUGAUC<br>UUU<br>UCCUG    | TGTATTA<br>TGTAATA<br>G     | 8 |
| hsa-miR-1259    | 730  | 8:0:1 | -9.55 | -7.98  | -1.56 | AGACCC<br>UUUAA<br>CUGUGA                     | ATTATAT<br>ATAT             | 8 |

|                 |      |       |       |       |       |                                                                    |   |
|-----------------|------|-------|-------|-------|-------|--------------------------------------------------------------------|---|
| hsa-miR-548j    | 658  | 8:1:1 | -8.1  | -6.56 | -1.53 | AAAAGU<br>AAUUGC ATTATAT<br>GGUCUU TCAT<br>UGGU                    | 8 |
| hsa-miR-1       | 660  | 8:1:1 | -9.3  | -7.77 | -1.52 | ACAUAC<br>UUCUUU TATATTC<br>AUAUGC ATAGTA<br>CCAU                  | 8 |
| hsa-miR-944     | 814  | 8:1:1 | -8.3  | -6.78 | -1.51 | AAAUUA<br>UUGUAC TAATAAT<br>AUCGGA AATGAAT<br>UGAG TA              | 8 |
| hsa-miR-581     | 423  | 8:1:1 | -9.5  | -8    | -1.49 | UCUUGU<br>GUUCUC GACACA<br>UAGAUC TGTGATT<br>AGU ATTT              | 8 |
| hsa-miR-155     | 845  | 8:1:1 | -9.7  | -8.24 | -1.45 | UUA AUG<br>CUAAUC AAGTATT<br>GUGAUA ATTATAA<br>GGGGU AAT<br>UCUACA | 8 |
| hsa-miR-1283    | 943  | 8:1:1 | -8.5  | -7.08 | -1.41 | AAGGAA TTTTGTA<br>AGCGCU TTCA<br>UUCU                              | 8 |
| hsa-miR-409-3p  | 863  | 8:1:1 | -7.6  | -6.21 | -1.38 | GAAUGU<br>UGCUCG GTAACA<br>GUGAAC ATGTAAT<br>CCCU ATA              | 8 |
| hsa-miR-494     | 410  | 8:1:0 | -8.3  | -6.94 | -1.35 | AGGUUG<br>UCCGUG TTTGTTT<br>UUGUCU CTATTTG<br>UCUCU ACACA          | 8 |
| hsa-miR-452     | 857  | 8:1:1 | -7.4  | -6.07 | -1.32 | AACUGU<br>UUGCAG AAAATA<br>AGGAAA GTAACA<br>CUGA ATGTAAT           | 8 |
| hsa-miR-1206    | 795  | 8:1:1 | -7.5  | -6.23 | -1.26 | UGUUCA<br>UGUAGA ATATCAA<br>UGUUUA CACATTA<br>AGC TAAT             | 8 |
| hsa-miR-1272    | 968  | 8:1:1 | -6.4  | -5.17 | -1.22 | GAUGAU<br>GAUGGC ATCAATA<br>AGCAAA TAGGAA<br>UUCUGA A<br>AA        | 8 |
| hsa-miR-190b    | 720  | 8:1:1 | -7.7  | -6.49 | -1.2  | UGAUAU<br>GUUUGA AATATTT<br>UAUUGG CTTATTA<br>GUU TAT              | 8 |
| hsa-miR-548l    | 268  | 8:1:1 | -5.8  | -4.61 | -1.18 | AAAAGU<br>AAUUGC AATATAT<br>GGGUUU TCGAT<br>UGUC                   | 8 |
| hsa-miR-202     | 641  | 8:1:1 | -7.6  | -6.42 | -1.17 | UCCUA<br>UGCAUA TATACCA<br>UACUUC TACCATA<br>UUUG TA               | 8 |
| hsa-miR-548a-5p | 433  | 8:1:1 | -9.8  | -8.63 | -1.16 | AAAAGU<br>AAUUGC ATTATTT<br>GAGUUU GTAT<br>UACC                    | 8 |
| hsa-miR-576-5p  | 630  | 8:1:0 | -5    | -3.89 | -1.1  | AUUCUA<br>AUUUCU AAATAG<br>CCACGU AAAAAT<br>CUUU                   | 8 |
| hsa-miR-429     | 1068 | 8:1:1 | -10.1 | -9.01 | -1.08 | UAAUAC<br>UGUCUG ATAGTAT<br>GUAAAA ATATAAT<br>CCGU GTCGC           | 8 |

|               |      |       |       |        |       |                                               |                             |   |
|---------------|------|-------|-------|--------|-------|-----------------------------------------------|-----------------------------|---|
| hsa-miR-135b  | 340  | 8:1:1 | -4.19 | -3.11  | -1.07 | UAUGGC<br>UUUUCA<br>UUCCUA<br>UGUGA<br>UUCAAG | AATGTCA<br>TTGTTCA<br>TA    | 8 |
| hsa-miR-26b   | 417  | 8:1:1 | -10.4 | -9.35  | -1.04 | UAAUUC<br>AGGAUA<br>GGU<br>UGAUAU             | CTATTTG<br>ACACAT<br>GT     | 8 |
| hsa-miR-190b  | 361  | 8:1:1 | -6.43 | -5.42  | -1    | GUUUGA<br>UAUUGG<br>GUU<br>UGGAAU             | AATATAT<br>AATT             | 8 |
| hsa-miR-206   | 982  | 8:1:1 | -9.31 | -8.31  | -0.99 | GUAAGG<br>AAGUGU<br>GUGG                      | TAAATTC<br>TTTTTAA<br>GA    | 8 |
| hsa-miR-135a  | 340  | 8:1:1 | -4.1  | -3.11  | -0.98 | UAUGGC<br>UUUUUA<br>UUCCUA<br>UGUGA<br>GUGUUG | AATGTCA<br>TTGTTCA<br>T     | 8 |
| hsa-miR-653   | 796  | 8:1:0 | -7.2  | -6.24  | -0.95 | AAACAA<br>UCUCUA<br>CUG                       | TATCAAC<br>ACATTAT<br>AATA  | 8 |
| hsa-miR-26a   | 417  | 8:1:1 | -10.3 | -9.35  | -0.94 | UUCAAG<br>UAAUCC<br>AGGAUA<br>GGCU            | CTATTTG<br>ACACAT<br>GTG    | 8 |
| hsa-miR-613   | 639  | 8:1:1 | -6.4  | -5.49  | -0.9  | AGGAAU<br>GUUCCU<br>UCUUUG<br>CC              | AATATAC<br>CATACC<br>AT     | 8 |
| hsa-miR-1183  | 837  | 8:1:1 | -8.7  | -7.81  | -0.88 | CACUGU<br>AGGUGA<br>UGGUGA<br>GAGUGG<br>GCA   | CTTACAA<br>TAAGTAT<br>T     | 8 |
| hsa-miR-28-3p | 829  | 8:1:0 | -6.52 | -5.63  | -0.88 | CACUAG<br>AUUGUG<br>AGCUCC<br>UGGA            | AATCTAA<br>TCTTACA<br>ATAAG | 8 |
| hsa-miR-944   | 1104 | 8:1:1 | -13.5 | -12.62 | -0.87 | AAAUUA<br>UUGUAC<br>AUCGGA<br>UGAG            | TAATAAT<br>ATATTTA<br>T     | 8 |
| hsa-miR-758   | 349  | 8:1:1 | -4.2  | -3.32  | -0.87 | GAUGGU<br>UGACCA<br>GAGAGC<br>ACAC            | G TTCATA<br>ATTTTAA<br>TATA | 8 |
| hsa-miR-656   | 1102 | 8:1:0 | -12   | -11.19 | -0.8  | AGGUUG<br>CCUGUG<br>AGGUGU<br>UCA             | TATAATA<br>ATAT             | 8 |
| hsa-miR-144   | 1095 | 8:1:1 | -10.8 | -10.01 | -0.78 | GGAUAU<br>CAUCAU<br>AUACUG<br>UAAG            | TTTATTG<br>TATAATA<br>AT    | 8 |
| hsa-miR-944   | 841  | 8:1:0 | -8.8  | -8.02  | -0.77 | AAAUUA<br>UUGUAC<br>AUCGGA<br>UGAG            | CAATAA<br>GTATTA            | 8 |
| hsa-miR-105   | 433  | 8:1:1 | -9.4  | -8.63  | -0.76 | UCAAAU<br>GCUCAG<br>ACUCCU<br>GUGGU           | ATTATTT<br>GTATATA<br>TAAAT | 8 |
| hsa-miR-600   | 212  | 8:1:1 | -10.7 | -9.94  | -0.75 | ACUUAC<br>AGACAA<br>GAGCCU<br>UGCUC           | TTTGTA<br>ATATATA<br>TAT    | 8 |

|                 |      |       |        |        |       |                                              |                             |   |
|-----------------|------|-------|--------|--------|-------|----------------------------------------------|-----------------------------|---|
| hsa-miR-628-3p  | 727  | 8:1:1 | -8.5   | -7.75  | -0.74 | UCUAGU<br>AAGAGU<br>GGCAGU<br>CGA<br>CAAAAAG | CTTATTA<br>TATATAT<br>ATATA | 8 |
| hsa-miR-548n    | 367  | 8:1:1 | -5.44  | -4.69  | -0.74 | UAUUUG<br>UGGAUU<br>UUGU<br>GGAUAU           | TAATTTT<br>TATTT            | 8 |
| hsa-miR-144     | 374  | 8:1:1 | -5.7   | -4.96  | -0.73 | CAUCAU<br>AUACUG<br>UAAG<br>UACGGU           | TATTTTG<br>TTTGAT<br>AATAT  | 8 |
| hsa-miR-433     | 804  | 8:1:1 | -8.62  | -7.89  | -0.72 | GAGCCU<br>GUCAUU<br>AUUC<br>AUGUAU           | CATTATA<br>ATATAAT<br>A     | 8 |
| hsa-miR-568     | 390  | 8:1:1 | -8.1   | -7.38  | -0.71 | AAAUGU<br>AUACAC<br>AC<br>UCUAUA             | TATATAT<br>AAATTCG<br>TTT   | 8 |
| hsa-miR-1284    | 382  | 8:1:1 | -9.2   | -8.54  | -0.65 | CAGACC<br>CUGGCU<br>UUUC<br>UGUAAA           | TTGTATA<br>ATATATA<br>TAAAT | 8 |
| hsa-miR-30a     | 1092 | 8:1:1 | -11.31 | -10.7  | -0.6  | CAUCCU<br>CGACUG<br>GAAG<br>UGUGAC           | TTGTTTA<br>TTGTA            | 8 |
| hsa-miR-542-3p  | 420  | 8:1:1 | -9.4   | -8.8   | -0.59 | AGAUUG<br>AUAACU<br>GAAA<br>UUCAAG           | TTTGACA<br>CATGT            | 8 |
| hsa-miR-1297    | 434  | 8:1:1 | -10    | -9.45  | -0.54 | UAUUUC<br>AGGUG<br>UGUAAA<br>CAUCCC          | TTATTTG<br>TATATAT<br>AAAT  | 8 |
| hsa-miR-30d     | 1092 | 8:1:1 | -11.21 | -10.7  | -0.5  | CGACUG<br>GAAG<br>ACAUAC<br>UUCUUU           | TTGTTTA<br>TTG              | 8 |
| hsa-miR-1       | 982  | 8:1:1 | -8.81  | -8.31  | -0.49 | AUAUGC<br>CCAU<br>UGGUGG<br>UUUACA           | TAAATTC<br>TTTTTAA<br>GA    | 8 |
| hsa-miR-876-3p  | 1186 | 8:1:1 | -12.3  | -11.82 | -0.47 | AAGUAA<br>UUCA<br>UGAUAU<br>GUUUGA           | AAAATA<br>CCATAA<br>CTT     | 8 |
| hsa-miR-190b    | 873  | 8:0:1 | -11.3  | -10.85 | -0.44 | UAUUGG<br>GUU<br>AAAAGU<br>AAUUGU            | AATATAT<br>CATATAT<br>AATA  | 8 |
| hsa-miR-548d-5p | 658  | 8:1:1 | -7     | -6.56  | -0.43 | GGUUUU<br>UGCC<br>UGAUUG<br>UAGCCU           | ATTATAT<br>TCA              | 8 |
| hsa-miR-508-3p  | 838  | 8:1:1 | -8.2   | -7.8   | -0.39 | UUUGGA<br>GUAGA<br>GAAGUU<br>GUUCGU          | TTACAAT<br>AAGTAT           | 8 |
| hsa-miR-382     | 865  | 8:1:1 | -6.65  | -6.28  | -0.36 | GGUGGA<br>UUCG<br>UGAUAU<br>GUUUGA           | AACAAT<br>GTAATAT<br>ATC    | 8 |
| hsa-miR-190     | 361  | 8:1:1 | -5.73  | -5.42  | -0.3  | UAUAUU<br>AGGU                               | AATATAT<br>AATTTT           | 8 |

|                |      |       |       |        |          |                                                 |                             |   |
|----------------|------|-------|-------|--------|----------|-------------------------------------------------|-----------------------------|---|
| hsa-miR-592    | 498  | 8:0:0 | -13.7 | -13.4  | -0.29    | UUGUGU<br>CAAUAU<br>GCGAUG<br>AUGU              | TTGACAC<br>ATTTGAT<br>TATT  | 8 |
| hsa-miR-190    | 718  | 8:1:1 | -6.2  | -5.95  | -0.24    | UGAUUU<br>GUUUUGA<br>UAUAAU<br>AGGU             | AAAATAT<br>TTCTTAT<br>TATAT | 8 |
| hsa-miR-206    | 87   | 8:1:1 | -10.7 | -10.51 | -0.18    | UGGAAU<br>GUAAGG<br>AAGUGU<br>GUGG<br>CCUGGA    | TATATTC<br>ATTTGTA<br>T     | 8 |
| hsa-miR-875-3p | 413  | 8:1:1 | -7.9  | -7.73  | -0.16    | AACACU<br>GAGGUU<br>GUG                         | GTTTCTA<br>TTT              | 8 |
| hsa-miR-641    | 304  | 8:1:1 | -4.2  | -4.03  | -0.16    | AAAGAC<br>AUAGGA<br>UAGAGU<br>CACCCUC<br>AAAAGU | TATTTTTT<br>TTTCATT         | 8 |
| hsa-miR-548h   | 405  | 8:1:1 | -6.9  | -6.74  | -0.15    | AAUCGC<br>GGUUUU<br>UGUC                        | TTTATTTT<br>GTTTCT          | 8 |
| hsa-miR-208b   | 314  | 8:1:1 | -5.9  | -5.77  | -0.12    | AAGCUU<br>UUUGCU<br>CGAAUU<br>AUGU<br>UCAUUU    | TCATTTT<br>ATT              | 8 |
| hsa-miR-153    | 866  | 8:1:1 | -6.6  | -6.48  | -0.11    | UUGUGA<br>UGUUGC<br>AGCU<br>CAUAAA              | ACAATGT<br>AAT              | 8 |
| hsa-miR-142-5p | 1202 | 8:1:1 | -8.7  | -8.6   | -0.099   | GUAGAA<br>AGCACU<br>ACU                         | TATTTTA<br>AGA              | 8 |
| hsa-miR-496    | 659  | 8:1:1 | -6.6  | -6.51  | -0.084   | UGAGUA<br>UUACAU<br>GGCCAA<br>UCUC              | TTATATT<br>CATAGTA<br>GTA   | 8 |
| hsa-miR-568    | 742  | 8:1:1 | -8.2  | -8.15  | -0.045   | AUGUAU<br>AAAUGU<br>AUACAC<br>AC                | TATATAT<br>ATTTAAT<br>ATA   | 8 |
| hsa-miR-584    | 1189 | 8:1:0 | -10.3 | -10.26 | -0.039   | UUAUGG<br>UUUGCC<br>UGGGAC<br>UGAG<br>CAAAAG    | ATACCAT<br>AACT             | 8 |
| hsa-miR-548n   | 297  | 8:1:1 | -8    | -7.97  | -0.029   | UAAUUG<br>UGGAUU<br>UUGU<br>GAUGAU              | ATATTTT<br>TATTTT           | 8 |
| hsa-miR-1272   | 1236 | 8:1:1 | -8.5  | -8.48  | -0.017   | GAUGGC<br>AGCAAA<br>UUCUGA<br>AA                | ATGATTA<br>TAATA            | 8 |
| hsa-miR-1276   | 197  | 8:1:1 | -12.7 | -12.69 | -0.00039 | UAAAGA<br>GCCUG<br>UGGAGA<br>CA                 | GGCTTTT<br>ATATAAT<br>AT    | 8 |
| hsa-miR-33a    | 819  | 8:1:1 | -6.9  | -6.91  | 0.012    | GUGCAU<br>UGUAGU<br>UGCAUU<br>GCA               | ATAATGA<br>ATTAATC<br>TAATC | 8 |
| hsa-miR-489    | 1078 | 8:1:1 | -10.9 | -10.92 | 0.023    | GGUCGU<br>AUGUGU<br>GACGCC<br>AUUU              | TAATGTC<br>GCGT             | 8 |

|                 |      |       |       |        |       |                                              |                             |   |
|-----------------|------|-------|-------|--------|-------|----------------------------------------------|-----------------------------|---|
| hsa-miR-548p    | 375  | 8:1:1 | -4.59 | -4.62  | 0.037 | UAGCAA<br>AAACUG<br>CAGUUA<br>CUUU<br>AACAUU | ATTTTGT<br>TTGTATA          | 8 |
| hsa-miR-181a    | 337  | 8:1:0 | -3.13 | -3.16  | 0.037 | CAACGC<br>UGUCGG<br>UGAGU                    | TTAAATG<br>TCAT             | 8 |
| hsa-miR-297     | 651  | 8:1:1 | -5.8  | -5.85  | 0.056 | AUGUAU<br>GUGUGC<br>AUGUGC<br>AUG<br>UGGAUU  | CATATAA<br>ATTATAT<br>TCATA | 8 |
| hsa-miR-1290    | 636  | 8:1:1 | -2.15 | -2.22  | 0.072 | UUUGGA<br>UCAGGG<br>A                        | AAAAAT<br>ATACC             | 8 |
| hsa-miR-656     | 255  | 8:0:0 | -10   | -10.07 | 0.077 | AGGUUG<br>CCUGUG<br>AGGUGU<br>UCA            | TATAATA<br>TTTCTAA<br>ATA   | 8 |
| hsa-miR-624     | 1054 | 8:1:0 | -8.9  | -8.98  | 0.086 | UAGUAC<br>CAGUAC<br>CUUGUG<br>UUCA           | TTCCTTG<br>TTTTTC           | 8 |
| hsa-miR-302c    | 1004 | 8:1:1 | -10.8 | -10.89 | 0.09  | UUUAAC<br>AUGGGG<br>GUACCU<br>GCUG<br>UGAUAU | AAGAATT<br>TTTTTT           | 8 |
| hsa-miR-190b    | 639  | 8:1:1 | -5.4  | -5.49  | 0.092 | GUUUGA<br>UAUUGG<br>GUU                      | AATATAC<br>CATACC           | 8 |
| hsa-miR-548c-5p | 433  | 8:1:1 | -8.5  | -8.63  | 0.13  | AAAAGU<br>AAUUGC<br>GGUUUU<br>UGCC           | ATTATTT<br>GTATAT           | 8 |
| hsa-miR-548i    | 433  | 8:1:1 | -8.5  | -8.63  | 0.13  | AAAAGU<br>AAUUGC<br>GGAUUU<br>UGCC           | ATTATTT<br>GTATATA<br>T     | 8 |
| hsa-miR-570     | 771  | 8:1:0 | -7.91 | -8.07  | 0.16  | AAAGGU<br>AAUUGC<br>AGUUUU<br>UCCC           | ATGTTTT<br>CAA              | 8 |
| hsa-miR-573     | 275  | 8:1:1 | -6.2  | -6.36  | 0.16  | CUGAAG<br>UGAUGU<br>GUAACU<br>GAUCAG         | TCGATTC<br>ATAATTT<br>TTT   | 8 |
| hsa-miR-569     | 966  | 8:1:1 | -3.2  | -3.37  | 0.17  | AGUUAA<br>UGAAUC<br>CUGGAA<br>AGU            | TCATCAA<br>TAT              | 8 |
| hsa-miR-30a     | 771  | 8:1:0 | -7.9  | -8.07  | 0.17  | UGUAAA<br>CAUCCU<br>CGACUG<br>GAAG           | ATGTTTT<br>CAACAC<br>CATAT  | 8 |
| hsa-miR-584     | 637  | 8:1:1 | -1.9  | -2.14  | 0.24  | UUUUGG<br>UUUGCC<br>UGGGAC<br>UGAG           | AAAATAT<br>ACCATA<br>CCAT   | 8 |
| hsa-miR-548c-5p | 405  | 8:1:1 | -6.5  | -6.74  | 0.24  | AAAAGU<br>AAUUGC<br>GGUUUU<br>UGCC           | TTTATTTT<br>GTTTCTA<br>TTTG | 8 |
| hsa-miR-586     | 276  | 8:1:1 | -6.8  | -7.06  | 0.26  | UAUGCA<br>UUGUAU<br>UUUUAG<br>GUCC           | CGATTCA<br>TAATTTT<br>TTG   | 8 |

|                 |      |       |       |        |      |                                                |                             |   |
|-----------------|------|-------|-------|--------|------|------------------------------------------------|-----------------------------|---|
| hsa-miR-369-3p  | 846  | 8:1:0 | -7.8  | -8.07  | 0.27 | AAUAAU<br>ACAUGG<br>UUGAUC<br>UUU              | AGTATTA<br>TTATAAA<br>AT    | 8 |
| hsa-miR-548l    | 720  | 8:1:1 | -6.2  | -6.49  | 0.29 | AAAAGU<br>AUUUGC<br>GGGUUU<br>UGUC             | AATATTT<br>CTTATTA<br>TA    | 8 |
| hsa-miR-147     | 421  | 8:1:1 | -8    | -8.3   | 0.3  | GUGUGU<br>GGAAAU<br>GCUUCU<br>GC               | TTGACAC<br>ATGTGAT          | 8 |
| hsa-miR-380     | 657  | 8:1:1 | -6.4  | -6.71  | 0.31 | UGGUUG<br>ACCAUA<br>GAACAU<br>GCGC             | AATTATA<br>TTCATA           | 8 |
| hsa-miR-380     | 1069 | 8:1:1 | -9.1  | -9.43  | 0.33 | UGGUUG<br>ACCAUA<br>GAACAU<br>GCGC             | TAGTATA<br>TAT              | 8 |
| hsa-miR-664     | 820  | 8:1:0 | -6.51 | -6.84  | 0.33 | ACUGGC<br>UAGGGA<br>AAUUGA<br>UUGGAU<br>UUAUGG | TAATGAA<br>TTAATCT          | 8 |
| hsa-miR-584     | 642  | 8:1:0 | -5.9  | -6.24  | 0.34 | UUUGCC<br>UGGGAC<br>UGAG                       | ATACCAT<br>ACC              | 8 |
| hsa-miR-548j    | 405  | 8:1:1 | -6.4  | -6.74  | 0.34 | AAAAGU<br>AAUUGC<br>GGUCUU<br>UGGU             | TTTATTTT<br>GTT             | 8 |
| hsa-miR-559     | 405  | 8:0:1 | -6.39 | -6.74  | 0.35 | UAAAGU<br>AAAUAU<br>GCACCA<br>AAA              | TTTATTTT<br>GTTTCTA<br>TTTG | 8 |
| hsa-miR-656     | 155  | 8:1:0 | -9.8  | -10.17 | 0.37 | AGGUUG<br>CCUGUG<br>AGGUGU<br>UCA              | TATAATA<br>ATAT             | 8 |
| hsa-miR-616     | 1025 | 8:1:1 | -11.5 | -11.91 | 0.41 | ACUCAA<br>AACCCU<br>UCAGUG<br>ACUU             | CTAATTA<br>CGTATA           | 8 |
| hsa-miR-520d-5p | 210  | 8:1:1 | -9.6  | -10.01 | 0.41 | CUACAA<br>AGGGAA<br>GCCCUU<br>UC               | TATTTGT<br>AAATATA<br>T     | 8 |
| hsa-miR-539     | 368  | 8:1:1 | -4.49 | -4.91  | 0.42 | GGAGAA<br>AUUAUC<br>CUUGGU<br>GUGU             | AATTTT<br>ATTTTGT<br>TTGTA  | 8 |
| hsa-miR-181c    | 337  | 8:1:0 | -2.69 | -3.16  | 0.47 | AACAUU<br>CAACCU<br>GUCGGU<br>GAGU             | TTAAATG<br>TCAT             | 8 |
| hsa-miR-490-5p  | 277  | 8:1:1 | -7.4  | -7.88  | 0.48 | CCAUGG<br>AUCUCC<br>AGGUGG<br>GU               | GATTCAT<br>AATTTT           | 8 |
| hsa-miR-190     | 639  | 8:1:1 | -5    | -5.49  | 0.49 | UGAUAU<br>GUUUGA<br>UAUAUU<br>AGGU             | AATATAC<br>CAT              | 8 |
| hsa-miR-548n    | 319  | 8:0:1 | -7.2  | -7.69  | 0.49 | CAAAAG<br>UAAUUG<br>UGGAUU<br>UUGU             | TTATTTT<br>GAT              | 8 |

|                |      |       |        |        |      |                                                             |                             |   |
|----------------|------|-------|--------|--------|------|-------------------------------------------------------------|-----------------------------|---|
| hsa-miR-590-3p | 206  | 8:1:0 | -12.1  | -12.59 | 0.49 | UAAUUU<br>UAUGUA<br>UAAGCU<br>AGU<br>AGUGAA                 | ATAATAT<br>TTGTA            | 8 |
| hsa-miR-1257   | 951  | 8:1:1 | -5.43  | -5.93  | 0.5  | UGAUGG<br>GUUCUG<br>ACC<br>CAAAAG                           | TCATACA<br>TACTAT           | 8 |
| hsa-miR-548n   | 406  | 8:1:1 | -6.3   | -6.8   | 0.5  | JAAUUG<br>UGGAUU<br>UUGU<br>CAAAGA                          | TTATTTT<br>GTTTCTA<br>TTTG  | 8 |
| hsa-miR-583    | 922  | 8:0:1 | -10.22 | -10.75 | 0.53 | GGAAGG<br>UCCCAU<br>UAC                                     | TCCTTTT<br>TTTTT            | 8 |
| hsa-miR-190    | 388  | 8:1:1 | -6.85  | -7.39  | 0.54 | UGAUAU<br>GUUUGA<br>UAUAUU<br>AGGU<br>UUUGGC                | AATATAT<br>ATAAATT<br>CGT   | 8 |
| hsa-miR-1826   | 1236 | 8:1:1 | -7.9   | -8.48  | 0.58 | AAUGGU<br>AGAACU<br>CACACU<br>CAAAGA                        | ATGATTA<br>TAATATA          | 8 |
| hsa-miR-186    | 1007 | 8:0:1 | -8.56  | -9.19  | 0.63 | AUUCUC<br>CUUUUG<br>GGCU<br>GAUGAU<br>GAUGGC                | AATTTTT<br>TTTTA            | 8 |
| hsa-miR-1272   | 805  | 8:1:1 | -8.01  | -8.64  | 0.63 | AGCAAA<br>UUCUGA<br>AA<br>GUGUCU<br>UUUGCU<br>CUGCAG<br>UCA | ATTATAA<br>TATAATA          | 8 |
| hsa-miR-511    | 637  | 8:1:1 | -1.5   | -2.14  | 0.64 | UAAAGU<br>AAAUAU<br>GCACCA<br>AAA                           | AAAATAT<br>ACCA             | 8 |
| hsa-miR-559    | 302  | 8:0:1 | -5.6   | -6.25  | 0.65 | GAGCUU<br>UUGGCC<br>CGGGUU<br>AUAC                          | TTTATTTT<br>TTTTTCA         | 8 |
| hsa-miR-208a   | 314  | 8:1:1 | -5.1   | -5.77  | 0.67 | CAUUUU<br>UACUUU<br>UGGUAC<br>GCG                           | TCATTTT<br>ATTTTTG<br>ATTTT | 8 |
| hsa-miR-126    | 1231 | 8:1:1 | -8.4   | -9.13  | 0.73 | AGUGGU<br>UCUUAU<br>CAGUUC<br>AACAGU<br>U                   | ACGTTAT<br>GATTATA<br>ATATA | 8 |
| hsa-miR-203    | 793  | 8:1:1 | -5     | -5.73  | 0.73 | UAGAUU<br>AAAUAU<br>UGGUAC<br>CUG                           | ATATATC<br>AACACA<br>T      | 8 |
| hsa-miR-577    | 306  | 8:1:1 | -3.9   | -4.63  | 0.73 | UGCAAC<br>UUACCU<br>GAGUCA<br>UUGA                          | TTTTTTTT<br>TCA             | 8 |
| hsa-miR-891b   | 1178 | 8:0:1 | -13.5  | -14.24 | 0.74 | AAAUAU<br>UUGUAC<br>AUCGGA<br>UGAG                          | TAAGTTG<br>TAAAATA<br>CC    | 8 |
| hsa-miR-944    | 257  | 8:1:1 | -9.1   | -9.84  | 0.74 | AAAUAU<br>UUGUAC<br>AUCGGA<br>UGAG                          | TAATATT<br>TCTAAAT<br>A     | 8 |

|              |      |       |       |        |      |                                                           |   |
|--------------|------|-------|-------|--------|------|-----------------------------------------------------------|---|
| hsa-miR-568  | 740  | 8:1:1 | -8.2  | -8.95  | 0.75 | AUGUAU<br>AAAUGU TATATAT<br>AUACAC ATAT<br>AC             | 8 |
| hsa-miR-26b  | 434  | 8:1:1 | -8.7  | -9.45  | 0.75 | UUCAAG<br>UAAUUC TTATTTG<br>AGGAUA TATAT<br>GGU           | 8 |
| hsa-miR-568  | 738  | 8:1:1 | -8.1  | -8.9   | 0.8  | AUGUAU<br>AAAUGU TATATAT<br>AUACAC ATAT<br>AC             | 8 |
| hsa-miR-653  | 775  | 8:0:0 | -9    | -9.81  | 0.81 | GUGUUG<br>AAACAA TTTCAAC<br>UCUCUA ACC<br>CUG             | 8 |
| hsa-miR-23b  | 867  | 8:1:0 | -5.81 | -6.68  | 0.87 | UGGGUU<br>CCUGGC CAATGTA<br>AUGCUG ATATATC<br>AUUU        | 8 |
| hsa-miR-944  | 817  | 8:1:1 | -6.04 | -6.91  | 0.87 | AAAUUA<br>UUGUAC TAATAAT<br>AUCGGA GAATT<br>UGAG          | 8 |
| hsa-miR-1278 | 667  | 8:1:1 | -9    | -9.87  | 0.87 | UAGUAC<br>UGUGCA ATAGTA<br>UAUCAU GTATATT<br>CUAU         | 8 |
| hsa-miR-568  | 175  | 8:1:1 | -12.4 | -13.28 | 0.88 | AUGUAU<br>AAAUGU TATATAT<br>AUACAC ATAATTT<br>AC GT       | 8 |
| hsa-miR-1259 | 649  | 8:1:0 | -4.8  | -5.7   | 0.9  | UCCCCG<br>AGACCC ACCATAT<br>UUUAAC AAAT<br>CUGUGA         | 8 |
| hsa-miR-200c | 847  | 8:1:1 | -6.9  | -7.81  | 0.91 | CGUCUU<br>ACCCAG GTATTAT<br>CAGUGU TATAAAA<br>UUGG        | 8 |
| hsa-miR-1    | 87   | 8:1:1 | -9.6  | -10.51 | 0.91 | ACAUAC<br>UUCUUU TATATTC<br>AUAUGC ATTTGT<br>CCAU         | 8 |
| hsa-miR-1252 | 410  | 8:1:1 | -6    | -6.94  | 0.94 | AGAAGG<br>AAAUUG TTTGTTT<br>AAUUCA CTATTTG<br>UUUA ACAC   | 8 |
| hsa-miR-380  | 1243 | 8:1:1 | -7.3  | -8.26  | 0.96 | UGGUUG<br>ACCAUA TAATATA<br>GAACAU TTTGA<br>GCGC          | 8 |
| hsa-miR-203  | 314  | 8:1:1 | -4.8  | -5.77  | 0.97 | AGUGGU<br>UCUUAU<br>CAGUUC TCATTTT<br>AACAGU ATTTTTG<br>U | 8 |
| hsa-miR-384  | 973  | 8:1:0 | -7.1  | -8.08  | 0.98 | AUUCCU<br>AGAAAU TATAGG<br>UGUUCA AAATAA<br>UA A          | 8 |
| hsa-miR-23a  | 867  | 8:1:0 | -5.7  | -6.68  | 0.98 | GGGGUU<br>CCUGGG CAATGTA<br>GAUGGG ATATATC<br>AUUU        | 8 |
| hsa-miR-944  | 157  | 8:1:1 | -10.2 | -11.2  | 1    | AAAUUA<br>UUGUAC TAATAAT<br>AUCGGA ATT<br>UGAG            | 8 |

|                 |      |       |        |        |      |                                              |                             |   |
|-----------------|------|-------|--------|--------|------|----------------------------------------------|-----------------------------|---|
| hsa-miR-890     | 263  | 8:1:1 | -5.6   | -6.61  | 1.01 | UACUUG<br>GAAAGG<br>CAUCAG<br>UUG            | TTCTAAA<br>TATATTC<br>GAT   | 8 |
| hsa-miR-374a    | 1275 | 8:0:1 | -9.1   | -10.12 | 1.02 | UUUAUA<br>UACAAC<br>CUGAUA<br>AGUG<br>GUGUCU | GTATTAT<br>GTAATA<br>GTA    | 8 |
| hsa-miR-511     | 619  | 8:1:0 | -7.9   | -8.92  | 1.02 | UUUGCU<br>CUGCAG<br>UCA                      | AAAAGA<br>AAAAAA<br>AATA    | 8 |
| hsa-miR-19b     | 211  | 8:1:1 | -7.8   | -8.84  | 1.04 | AGUUUU<br>GCAUAG<br>UUGCAC<br>UACA           | ATTTGTA<br>AATAT            | 8 |
| hsa-miR-559     | 40   | 8:1:0 | -9.05  | -10.09 | 1.04 | UAAAGU<br>AAAUAU<br>GCACCA<br>AAA            | TTTACTT<br>GTTTATT<br>TTT   | 8 |
| hsa-miR-548b-5p | 302  | 8:1:1 | -5.2   | -6.25  | 1.05 | AAAAGU<br>AAUUGU<br>GGUUUU<br>GGCC           | TTTATTTT<br>TT              | 8 |
| hsa-miR-381     | 1056 | 8:1:0 | -8     | -9.07  | 1.07 | AGCGAG<br>GUUGCC<br>CUUUGU<br>AUAU           | CCTTGTT<br>TTTCCAT<br>AGT   | 8 |
| hsa-miR-300     | 1056 | 8:1:0 | -8     | -9.07  | 1.07 | UAUACA<br>AGGGCA<br>GACUCU<br>CUCU           | CCTTGTT<br>TTTCCAT<br>AGTAT | 8 |
| hsa-miR-523     | 1082 | 8:1:1 | -10.33 | -11.43 | 1.1  | CUCUAG<br>AGGGAA<br>GCGCUU<br>UCUG           | GTCGCG<br>TTATTT            | 8 |
| hsa-miR-570     | 308  | 8:1:1 | -3.2   | -4.31  | 1.11 | AAAGGU<br>AAUUGC<br>AGUUUU<br>UCCC           | TTTTTTTC<br>ATTTTAT<br>T    | 8 |
| hsa-miR-548b-5p | 433  | 8:1:1 | -7.5   | -8.63  | 1.13 | AAAAGU<br>AAUUGU<br>GGUUUU<br>GGCC           | ATTATTT<br>GTATATA          | 8 |
| hsa-miR-487a    | 253  | 8:1:0 | -10.6  | -11.73 | 1.13 | GUGGUU<br>AUCCCU<br>GCUGUG<br>UUCG           | TGTATAA<br>TATTTCT          | 8 |
| hsa-miR-300     | 380  | 8:1:1 | -5.4   | -6.54  | 1.14 | UAUACA<br>AGGGCA<br>GACUCU<br>CUCU           | GTTTGTA<br>TAATATA          | 8 |
| hsa-miR-934     | 671  | 8:1:1 | -10.2  | -11.35 | 1.15 | UGUCUA<br>CUACUG<br>GAGACA<br>CUGG           | TAGTATA<br>TTATATG<br>GT    | 8 |
| hsa-miR-144     | 407  | 8:1:1 | -5.6   | -6.75  | 1.15 | GGAUAU<br>CAUCAU<br>AUACUG<br>UAAG           | TATTTTG<br>TTTC             | 8 |
| hsa-miR-592     | 950  | 8:1:1 | -6.3   | -7.46  | 1.16 | UUGUGU<br>CAAUAU<br>GCGAUG<br>AUGU           | TTCATAC<br>ATA              | 8 |
| hsa-miR-655     | 869  | 8:1:0 | -7     | -8.18  | 1.18 | AGAGGU<br>UAUCCG<br>UGUUAU<br>GUUC           | ATGTAAT<br>ATA              | 8 |

|                 |      |       |       |        |      |                                              |                             |   |
|-----------------|------|-------|-------|--------|------|----------------------------------------------|-----------------------------|---|
| hsa-miR-190     | 1212 | 8:1:1 | -6.6  | -7.79  | 1.19 | UGAUAU<br>GUUUGA<br>UAUAAU<br>AGGU<br>UUCAAG | AATATAT<br>ATATAA           | 8 |
| hsa-miR-26a     | 494  | 8:0:1 | -12.4 | -13.59 | 1.19 | UAAUCC<br>AGGAUA<br>GGCU<br>UUCAAG           | TTATTTG<br>ACACAT           | 8 |
| hsa-miR-26b     | 494  | 8:0:1 | -12.4 | -13.59 | 1.19 | UAAUUC<br>AGGAUA<br>GGU<br>AAUAAU            | TTATTTG<br>ACACATT<br>TGA   | 8 |
| hsa-miR-369-3p  | 870  | 8:1:0 | -7.3  | -8.51  | 1.21 | ACAUGG<br>UUGAUC<br>UUU<br>AUAUAA            | TGTAATA<br>TATC             | 8 |
| hsa-miR-374b    | 1275 | 8:0:1 | -8.9  | -10.12 | 1.22 | UACAAC<br>CUGCUA<br>AGUG<br>CGUCUU           | GTATTAT<br>GTAAT            | 8 |
| hsa-miR-200c    | 294  | 8:1:1 | -7.1  | -8.34  | 1.24 | ACCCAG<br>CAGUGU<br>UUGG<br>AAACCU           | GTAATAT<br>TTTTATT          | 8 |
| hsa-miR-649     | 1228 | 8:1:1 | -9.1  | -10.36 | 1.26 | GUGUUG<br>UUCAAG<br>AGUC<br>UCCCUG           | TACACGT<br>TATGATT<br>ATA   | 8 |
| hsa-miR-1259    | 852  | 8:1:1 | -6.6  | -7.86  | 1.26 | AGACCC<br>UUUAAC<br>CUGUGA<br>CAAAGA         | ATTATAA<br>AATAGTA          | 8 |
| hsa-miR-186     | 328  | 8:1:1 | -2.8  | -4.06  | 1.26 | AUUCUC<br>CUUUUG<br>GGCU<br>AAAAGU           | ATTTTTTT<br>TTTA            | 8 |
| hsa-miR-548k    | 846  | 8:1:1 | -6.8  | -8.07  | 1.27 | ACUUGC<br>GGUUUU<br>UGCU<br>AAAAGU           | AGTATTA<br>TTATAAA<br>A     | 8 |
| hsa-miR-548b-5p | 366  | 8:1:1 | -3.3  | -4.59  | 1.29 | AAUUGU<br>GGUUUU<br>GGCC<br>CAUAAA           | ATAATTT<br>TTATTTT<br>GTT   | 8 |
| hsa-miR-142-5p  | 315  | 8:1:1 | -5.3  | -6.6   | 1.3  | GUAGAA<br>AGCACU<br>ACU<br>UAGCAA            | CATTTTA<br>TTTTTGA<br>TTTTT | 8 |
| hsa-miR-548p    | 306  | 8:1:1 | -3.3  | -4.63  | 1.33 | AAACUG<br>CAGUUA<br>CUUU<br>GUUGUG           | TTTTTTTT<br>TCATTTT<br>AT   | 8 |
| hsa-miR-599     | 499  | 8:1:0 | -11   | -12.34 | 1.34 | UCAGUU<br>UAUCAA<br>AC<br>AGGUUG             | TGACAC<br>ATTTGA            | 8 |
| hsa-miR-656     | 1241 | 8:0:0 | -7.2  | -8.56  | 1.36 | CCUGUG<br>AGGUGU<br>UCA<br>AAAUUA            | TATAATA<br>TATTTGA<br>AT    | 8 |
| hsa-miR-944     | 280  | 8:1:1 | -7.4  | -8.76  | 1.36 | UUGUAC<br>AUCGGA<br>UGAG<br>UGCAAC           | TCATAAT<br>TTTT             | 8 |
| hsa-miR-891a    | 400  | 8:1:1 | -4.9  | -6.33  | 1.43 | GAACCU<br>GAGCCA<br>CUGA                     | TTCGTTT<br>TATTTT           | 8 |

|                 |      |       |       |        |      |                                                                                                                                                                                           |                                                                                                                         |   |
|-----------------|------|-------|-------|--------|------|-------------------------------------------------------------------------------------------------------------------------------------------------------------------------------------------|-------------------------------------------------------------------------------------------------------------------------|---|
| hsa-miR-382     | 1254 | 8:1:1 | -9.1  | -10.54 | 1.44 | GAAGUU<br>GUUCGU<br>GGUGGA<br>UUCG<br>UGCAAC                                                                                                                                              | AATAAC<br>ATAAAA<br>CAATAG                                                                                              | 8 |
| hsa-miR-891a    | 410  | 8:1:1 | -5.5  | -6.94  | 1.44 | GAACCU<br>GAGCCA<br>CUGA<br>AGCGAG<br>GUUGCC<br>CUUUGU<br>AUAU                                                                                                                            | TTTGTTT<br>CTATTT<br>GTTTGTA<br>TAATATA<br>TAT                                                                          | 8 |
| hsa-miR-381     | 380  | 8:1:1 | -5.1  | -6.54  | 1.44 | UCAUUAU<br>UGCUUC<br>UUUCU<br>UCGAGG<br>AGCUCA<br>CAGUCU<br>AGU                                                                                                                           | GTAATAT<br>TTTTAT<br>TCATTTT<br>ATTTTGT<br>ATT                                                                          | 8 |
| hsa-miR-1279    | 294  | 8:1:1 | -6.9  | -8.34  | 1.44 | AAAAGU<br>AAUCGC<br>GGUUUU<br>UGUC<br>UGUAAA<br>CAUCCU<br>UGACUG<br>GAAG                                                                                                                  | ATTTTTTT<br>TTTAAAT<br>GTC<br>TTGTTTA<br>TTGTATA<br>ATAA                                                                | 8 |
| hsa-miR-151-3p  | 314  | 8:1:1 | -4.32 | -5.77  | 1.45 | UAAAGU<br>AAAUUAU<br>GCACCA<br>AAA<br>AAAAGU<br>AAUUGU<br>GGUUUU<br>UGCC<br>CUUAUG<br>CAAGAU<br>UCCCUU<br>CUAC<br>UAGAUA<br>AAAUUAU<br>UGGUAC<br>CUG<br>GGUGGA<br>UAUJCC<br>UUCUAU<br>GUU | TTTATTTT<br>GTTTGTA<br>T<br>TTTATTTT<br>GTTT<br>TTGTATA<br>ATAT<br>TTTTATTT<br>TGTTTGT<br>A<br>TTCTATT<br>TTAAGAA<br>AT | 8 |
| hsa-miR-548h    | 328  | 8:1:1 | -2.6  | -4.06  | 1.46 | UGAUUAU<br>GUUUGA<br>UAUUGG<br>GUU<br>UAAAGU<br>AAAUUAU<br>GCACCA<br>AAA<br>CAAAGA<br>GGAAGG<br>UCCCAU<br>UAC<br>UAAUUU<br>UAUGUA<br>UAAGCU<br>AGU                                        | AAAATAT<br>TTCTTAT<br>T<br>ATTATTT<br>TACTTGT<br>TTA<br>TCCTTGT<br>TTTT<br>ATAAAAT<br>AGTA                              | 8 |
| hsa-miR-30e     | 1092 | 8:1:1 | -9.21 | -10.7  | 1.49 | CAUCUU<br>ACUGGG<br>CAGCAU<br>UGGA                                                                                                                                                        | GTAGTAT<br>ATTATAT<br>G                                                                                                 | 8 |
| hsa-miR-559     | 372  | 8:0:1 | -3.5  | -4.99  | 1.49 | AAAAGU<br>AAUUGU<br>GGUUUU<br>UGCC<br>CUUAUG<br>CAAGAU<br>UCCCUU<br>CUAC<br>UAGAUA<br>AAAUUAU<br>UGGUAC<br>CUG<br>GGUGGA<br>UAUJCC<br>UUCUAU<br>GUU                                       | TTTATTTT<br>GTTT<br>TTGTATA<br>ATAT<br>TTTTATTT<br>TGTTTGT<br>A<br>TTCTATT<br>TTAAGAA<br>AT                             | 8 |
| hsa-miR-548d-5p | 372  | 8:1:1 | -3.5  | -4.99  | 1.49 | UGAUUAU<br>GUUUGA<br>UAUUGG<br>GUU<br>UAAAGU<br>AAAUUAU<br>GCACCA<br>AAA<br>CAAAGA<br>GGAAGG<br>UCCCAU<br>UAC<br>UAAUUU<br>UAUGUA<br>UAAGCU<br>AGU                                        | AAAATAT<br>TTCTTAT<br>T<br>ATTATTT<br>TACTTGT<br>TTA<br>TCCTTGT<br>TTTT<br>ATAAAAT<br>AGTA                              | 8 |
| hsa-miR-491-3p  | 382  | 8:0:1 | -7    | -8.54  | 1.54 | CAUCUU<br>ACUGGG<br>CAGCAU<br>UGGA                                                                                                                                                        | GTAGTAT<br>ATTATAT<br>G                                                                                                 | 8 |
| hsa-miR-577     | 371  | 8:0:1 | -3.6  | -5.14  | 1.54 | UAAAGU<br>AAAUUAU<br>GCACCA<br>AAA<br>CAAAGA<br>GGAAGG<br>UCCCAU<br>UAC<br>UAAUUU<br>UAUGUA<br>UAAGCU<br>AGU                                                                              | AAAATAT<br>TTCTTAT<br>T<br>ATTATTT<br>TACTTGT<br>TTA<br>TCCTTGT<br>TTTT<br>ATAAAAT<br>AGTA                              | 8 |
| hsa-miR-376c    | 1199 | 8:1:1 | -7    | -8.56  | 1.56 | UAAAGU<br>AAAUUAU<br>GCACCA<br>AAA<br>CAAAGA<br>GGAAGG<br>UCCCAU<br>UAC<br>UAAUUU<br>UAUGUA<br>UAAGCU<br>AGU                                                                              | AAAATAT<br>TTCTTAT<br>T<br>ATTATTT<br>TACTTGT<br>TTA<br>TCCTTGT<br>TTTT<br>ATAAAAT<br>AGTA                              | 8 |
| hsa-miR-190b    | 718  | 8:1:1 | -4.39 | -5.95  | 1.56 | UAAAGU<br>AAAUUAU<br>GCACCA<br>AAA<br>CAAAGA<br>GGAAGG<br>UCCCAU<br>UAC<br>UAAUUU<br>UAUGUA<br>UAAGCU<br>AGU                                                                              | AAAATAT<br>TTCTTAT<br>T<br>ATTATTT<br>TACTTGT<br>TTA<br>TCCTTGT<br>TTTT<br>ATAAAAT<br>AGTA                              | 8 |
| hsa-miR-559     | 35   | 8:1:1 | -6.87 | -8.44  | 1.57 | UAAAGU<br>AAAUUAU<br>GCACCA<br>AAA<br>CAAAGA<br>GGAAGG<br>UCCCAU<br>UAC<br>UAAUUU<br>UAUGUA<br>UAAGCU<br>AGU                                                                              | AAAATAT<br>TTCTTAT<br>T<br>ATTATTT<br>TACTTGT<br>TTA<br>TCCTTGT<br>TTTT<br>ATAAAAT<br>AGTA                              | 8 |
| hsa-miR-583     | 1055 | 8:1:1 | -7.4  | -8.98  | 1.58 | UAAAGU<br>AAAUUAU<br>GCACCA<br>AAA<br>CAAAGA<br>GGAAGG<br>UCCCAU<br>UAC<br>UAAUUU<br>UAUGUA<br>UAAGCU<br>AGU                                                                              | AAAATAT<br>TTCTTAT<br>T<br>ATTATTT<br>TACTTGT<br>TTA<br>TCCTTGT<br>TTTT<br>ATAAAAT<br>AGTA                              | 8 |
| hsa-miR-590-3p  | 855  | 8:1:0 | -6.3  | -7.88  | 1.58 | UAAAGU<br>AAAUUAU<br>GCACCA<br>AAA<br>CAAAGA<br>GGAAGG<br>UCCCAU<br>UAC<br>UAAUUU<br>UAUGUA<br>UAAGCU<br>AGU                                                                              | AAAATAT<br>TTCTTAT<br>T<br>ATTATTT<br>TACTTGT<br>TTA<br>TCCTTGT<br>TTTT<br>ATAAAAT<br>AGTA                              | 8 |
| hsa-miR-200b    | 670  | 8:1:1 | -9.47 | -11.06 | 1.59 | UAAAGU<br>AAAUUAU<br>GCACCA<br>AAA<br>CAAAGA<br>GGAAGG<br>UCCCAU<br>UAC<br>UAAUUU<br>UAUGUA<br>UAAGCU<br>AGU                                                                              | AAAATAT<br>TTCTTAT<br>T<br>ATTATTT<br>TACTTGT<br>TTA<br>TCCTTGT<br>TTTT<br>ATAAAAT<br>AGTA                              | 8 |

|                 |      |       |        |        |      |                                             |                             |   |
|-----------------|------|-------|--------|--------|------|---------------------------------------------|-----------------------------|---|
| hsa-miR-943     | 859  | 8:1:1 | -4.6   | -6.2   | 1.6  | CUGACU<br>GUUGCC<br>GUCCUC<br>CAG<br>UAGCAA | AATAGTA<br>ACAATGT<br>AAT   | 8 |
| hsa-miR-548p    | 307  | 8:1:1 | -2.72  | -4.34  | 1.62 | AAACUG<br>CAGUUA<br>CUUU                    | TTTTTTTT<br>CATTTTA         | 8 |
| hsa-miR-568     | 1216 | 8:1:1 | -4.9   | -6.53  | 1.63 | AUGUAU<br>AAAUGU<br>AUACAC<br>AC            | TATATAT<br>AATAATA<br>CACG  | 8 |
| hsa-miR-299-3p  | 951  | 8:1:1 | -4.3   | -5.93  | 1.63 | UAUGUG<br>GGAUGG<br>UAAACC<br>GCUU          | TCATACA<br>TACTAT           | 8 |
| hsa-miR-1244    | 1195 | 8:1:1 | -7.4   | -9.04  | 1.64 | AAGUAG<br>UUGGUU<br>UGUAUG<br>AGAUGG<br>UU  | TAACTTC<br>TATTTTA          | 8 |
| hsa-miR-19a     | 211  | 8:1:1 | -7.2   | -8.84  | 1.64 | AGUUUU<br>GCAUAG<br>UUGCAC<br>UACA          | ATTTGTA<br>AATATAT<br>ATAT  | 8 |
| hsa-miR-548c-3p | 326  | 8:1:0 | -4.1   | -5.75  | 1.65 | CAAAAA<br>UCUCAA<br>UUACUU<br>UUGC          | TGATTTT<br>TTTTTTA<br>AATGT | 8 |
| hsa-miR-1267    | 1064 | 8:1:1 | -5.1   | -6.77  | 1.67 | CCUGUU<br>GAAGUG<br>UAAUCC<br>CCA           | TTCCATA<br>GTATATA<br>T     | 8 |
| hsa-miR-802     | 1058 | 8:1:1 | -7.4   | -9.07  | 1.67 | CAGUAA<br>CAAAGA<br>UUCAUC<br>CUUGU         | TTGTTTT<br>TCCAT            | 8 |
| hsa-miR-155     | 1083 | 8:1:1 | -10.12 | -11.81 | 1.69 | UUAAUG<br>CUAAUC<br>GUGAUA<br>GGGGU         | TCGCGTT<br>ATTTGTT<br>TATT  | 8 |
| hsa-miR-190     | 218  | 8:1:1 | -9.6   | -11.3  | 1.7  | UGAUAU<br>GUUUGA<br>UAUAUU<br>AGGU          | AATATAT<br>ATATAT           | 8 |
| hsa-miR-374a    | 847  | 8:1:0 | -6.1   | -7.81  | 1.71 | UUAUAA<br>UACAAC<br>CUGAUA<br>AGUG          | GTATTAT<br>TATAAAA<br>TAGTA | 8 |
| hsa-miR-374b    | 847  | 8:1:0 | -6.1   | -7.81  | 1.71 | AUAUAA<br>UACAAC<br>CUGCUA<br>AGUG          | GTATTAT<br>TATAAAA<br>TAG   | 8 |
| hsa-miR-577     | 301  | 8:0:1 | -5.3   | -7.01  | 1.71 | UAGUAU<br>AAUAU<br>UGGUAC<br>CUG            | TTTTATTT<br>TTTTTTC<br>A    | 8 |
| hsa-miR-578     | 839  | 8:1:1 | -6.2   | -7.92  | 1.72 | CUUCUU<br>GUGCUC<br>UAGGAU<br>UGU           | TACAATA<br>AGTATTA<br>TT    | 8 |
| hsa-miR-1252    | 312  | 8:1:1 | -3.5   | -5.22  | 1.72 | AGAAGG<br>AAAUUG<br>AAUUCA<br>UUUA          | TTTCATT<br>TTAT             | 8 |
| hsa-miR-410     | 1097 | 8:1:1 | -8.6   | -10.35 | 1.75 | AGGUUG<br>UCUGUG<br>AUGAGU<br>UCG           | TATTGTA<br>TAATAAT<br>A     | 8 |

|                 |      |       |       |        |      |                                              |                           |   |
|-----------------|------|-------|-------|--------|------|----------------------------------------------|---------------------------|---|
| hsa-miR-548a-5p | 305  | 8:1:1 | -2.7  | -4.49  | 1.79 | AAAAGU<br>AAUUGC<br>GAGUUU<br>UACC<br>GUGUCU | ATTTTTTT<br>TTC           | 8 |
| hsa-miR-511     | 627  | 8:1:1 | -3.7  | -5.53  | 1.83 | UUUGC<br>CUGCAG<br>UCA                       | AAAAAA<br>TAGAAA          | 8 |
| hsa-miR-548d-5p | 35   | 8:0:1 | -6.6  | -8.44  | 1.84 | AAAAGU<br>AAUUGU<br>GGUUUU<br>UGCC           | ATTATTT<br>TACTT          | 8 |
| hsa-miR-641     | 722  | 8:1:0 | -5.2  | -7.05  | 1.85 | AAAGAC<br>AUAGGA<br>UAGAGU<br>CACCUC         | TATTTCT<br>TATTATA<br>TAT | 8 |
| hsa-miR-548a-5p | 302  | 8:1:1 | -4.4  | -6.25  | 1.85 | AAAAGU<br>AAUUGC<br>GAGUUU<br>UACC           | TTTTTTTT<br>TTTTT         | 8 |
| hsa-miR-586     | 820  | 8:1:1 | -4.96 | -6.84  | 1.88 | UAUGCA<br>UUGUUA<br>UUUUAG<br>GUCC           | TAATGAA<br>TAA            | 8 |
| hsa-miR-186     | 304  | 8:1:1 | -2.15 | -4.03  | 1.88 | CAAAGA<br>AUUCUC<br>CUUUUG<br>GGCU           | TATTTTTT<br>TTTCATT<br>TT | 8 |
| hsa-miR-200b    | 847  | 8:1:1 | -5.9  | -7.81  | 1.91 | CAUCUU<br>ACUGGG<br>CAGCAU<br>UGGA           | GTATTAT<br>TATAAA         | 8 |
| hsa-miR-606     | 668  | 8:1:1 | -7.9  | -9.83  | 1.93 | AAACUA<br>CUGAAA<br>AUCAAA<br>GAU            | TAGTAGT<br>ATAT           | 8 |
| hsa-miR-545     | 1094 | 8:1:1 | -8.7  | -10.64 | 1.94 | UCAGUA<br>AAUGUU<br>UAUUAG<br>AUGA           | GTTTATT<br>GTATAAT<br>A   | 8 |
| hsa-miR-802     | 411  | 8:1:0 | -5.6  | -7.55  | 1.95 | CAGUAA<br>CAAAGA<br>UUCAUC<br>CUUGU          | TTGTTTC<br>TATT           | 8 |
| hsa-miR-515-5p  | 555  | 8:1:0 | -8.05 | -10.01 | 1.96 | UUCUCC<br>AAAAGA<br>AAGCAC<br>UUUCUG         | TTTGAT<br>ATTTGTA<br>TA   | 8 |
| hsa-miR-491-3p  | 96   | 8:0:1 | -7.1  | -9.07  | 1.97 | CUUAUG<br>CAAGAU<br>UCCCUU<br>CUAC           | TTGTATA<br>ATATAAA        | 8 |
| hsa-miR-302a    | 1004 | 8:1:1 | -8.91 | -10.89 | 1.98 | ACUUAA<br>ACGUGG<br>AUGUAC<br>UUGCU          | AAGAATT<br>TTTTTTTA<br>AC | 8 |
| hsa-miR-1259    | 878  | 8:0:0 | -8.3  | -10.31 | 2.01 | UCCCUG<br>AGACCC<br>UUUAAC<br>CUGUGA         | ATCATAT<br>ATA            | 8 |
| hsa-miR-186     | 368  | 8:1:1 | -2.9  | -4.91  | 2.01 | CAAAGA<br>AUUCUC<br>CUUUUG<br>GGCU           | AATTTTT<br>ATTT           | 8 |
| hsa-miR-548n    | 307  | 8:1:1 | -2.33 | -4.34  | 2.01 | CAAAG<br>UAAUUG<br>UGGAUU<br>UUGU            | TTTTTTTT<br>CATTT         | 8 |

|                 |      |       |        |        |      |                                             |                             |   |
|-----------------|------|-------|--------|--------|------|---------------------------------------------|-----------------------------|---|
| hsa-miR-656     | 590  | 8:0:0 | -9.7   | -11.72 | 2.02 | AGGUUG<br>CCUGUG<br>AGGUGU<br>UCA<br>AAAAGU | TATAATA<br>TGTATG           | 8 |
| hsa-miR-548c-5p | 35   | 8:0:1 | -6.4   | -8.44  | 2.04 | AAUUGC<br>GGUUUU<br>UGCC                    | ATTATTT<br>TACT             | 8 |
| hsa-miR-568     | 439  | 8:1:1 | -8.2   | -10.25 | 2.05 | AUGUAU<br>AAAUGU<br>AUACAC<br>AC<br>UUUAUA  | TGTATAT<br>ATAAATT<br>TG    | 8 |
| hsa-miR-340     | 403  | 8:1:1 | -5     | -7.05  | 2.05 | AGCAAU<br>GAGACU<br>GAUU                    | GTTTTAT<br>TTTG             | 8 |
| hsa-miR-548d-5p | 302  | 8:1:1 | -4.2   | -6.25  | 2.05 | AAAAGU<br>AAUUGU<br>GGUUUU<br>UGCC          | TTTTTTTT<br>TTTTTCA<br>TTT  | 8 |
| hsa-miR-1179    | 1270 | 8:1:1 | -9.2   | -11.26 | 2.06 | AAGCAU<br>UCUUUC<br>AUUGGU<br>UGG<br>GAAGUU | AGAATG<br>TATTATG<br>TAA    | 8 |
| hsa-miR-382     | 1193 | 8:1:1 | -7.4   | -9.46  | 2.06 | GUUCGU<br>GGUGGA<br>UUCG                    | CATAACT<br>TCTATTT          | 8 |
| hsa-miR-448     | 593  | 8:1:1 | -10.15 | -12.21 | 2.06 | UUGCAU<br>AUGUAG<br>GAUGUC<br>CCAU          | AATATGT<br>ATGTGAT<br>TA    | 8 |
| hsa-miR-548p    | 408  | 8:1:1 | -4.7   | -6.78  | 2.08 | UAGCAA<br>AAACUG<br>CAGUUA<br>CUUU          | ATTTTGT<br>TTCTATT<br>TG    | 8 |
| hsa-miR-577     | 331  | 8:1:1 | -2.2   | -4.3   | 2.1  | UAGUAU<br>AAAUAU<br>UGGUAC<br>CUG           | TTTTTTTT<br>AAATGTC<br>ATT  | 8 |
| hsa-miR-548n    | 329  | 8:1:1 | -1.9   | -4     | 2.1  | CAAAAAG<br>UAAUUG<br>UGGAUU<br>UUGU         | TTTTTTTT<br>TTAAAT          | 8 |
| hsa-miR-374b    | 871  | 8:1:0 | -7.3   | -9.41  | 2.11 | AUAUAA<br>UACAAC<br>CUGCUA<br>AGUG          | GTAATAT<br>ATC              | 8 |
| hsa-miR-768-5p  | 836  | 8:1:1 | -4.85  | -6.97  | 2.12 | UGCACC<br>AUGGUU<br>GUCUGA<br>GCAUG         | TCTTACA<br>ATAAGTA<br>TTATT | 8 |
| hsa-miR-548e    | 303  | 8:1:1 | -3     | -5.12  | 2.12 | CAAAAAG<br>CAAUCG<br>CGUUUU<br>UUGC         | TTATTTTT<br>TTT             | 8 |
| hsa-miR-944     | 295  | 8:1:1 | -6.1   | -8.25  | 2.15 | AAAUUA<br>UUGUAC<br>AUCGGA<br>UGAG          | TAATATT<br>TTTATTT          | 8 |
| hsa-miR-361-5p  | 323  | 8:1:1 | -5.55  | -7.71  | 2.16 | UUAUCA<br>GAAUCU<br>CCAGGG<br>GUAC          | TTTTGAT<br>TTTTTTTT<br>TA   | 8 |
| hsa-miR-577     | 404  | 8:0:1 | -4.6   | -6.78  | 2.18 | UAGUAU<br>AAAUAU<br>UGGUAC<br>CUG           | TTTTATTT<br>TGTTTCT<br>ATT  | 8 |

|                  |      |       |       |        |      |                                                          |   |
|------------------|------|-------|-------|--------|------|----------------------------------------------------------|---|
| hsa-miR-337-3p   | 15   | 8:1:0 | -6.2  | -8.38  | 2.18 | CUCCUA<br>UAUGAU ATATAAG<br>GCCUUU AAAAAA<br>CUUC        | 8 |
| hsa-miR-190b     | 1212 | 8:1:1 | -5.6  | -7.79  | 2.19 | UGAUAU<br>GUUUGA AATATAT<br>UAUUGG ATATAAT<br>GUU AATA   | 8 |
| hsa-miR-548i     | 305  | 8:1:1 | -2.3  | -4.49  | 2.19 | AAAAGU<br>AAUUGC ATTTTTTT<br>GGAUUU TTCATTT<br>UGCC TATT | 8 |
| hsa-miR-620      | 1061 | 8:1:1 | -6.4  | -8.6   | 2.2  | AUGGAG<br>AUAGAU TTTTCC<br>AUAGAA ATAGTAT<br>AU          | 8 |
| hsa-miR-548i     | 372  | 8:1:1 | -2.79 | -4.99  | 2.2  | AAAAGU<br>AAUUGC TTTATTTT<br>GGAUUU GTTTGTA<br>UGCC      | 8 |
| hsa-miR-656      | 99   | 8:0:0 | -9.7  | -11.92 | 2.22 | AGGUUG<br>CCUGUG TATAATA<br>AGGUGU TAAATAT<br>UCA ATAT   | 8 |
| hsa-miR-548d-5p  | 433  | 8:1:1 | -6.4  | -8.63  | 2.23 | AAAAGU<br>AAUUGU ATTATTT<br>GGUUUU GTA<br>UGCC           | 8 |
| hsa-miR-499-5p   | 845  | 8:1:0 | -6    | -8.24  | 2.24 | UUAAGA<br>CUUGCA AAGTATT<br>GUGAUG ATTATAA<br>UUU AAT    | 8 |
| hsa-miR-300      | 1097 | 8:1:1 | -8.1  | -10.35 | 2.25 | UAUACA<br>AGGGCA TATTGTA<br>GACUCU TAATAAT<br>CUCU AT    | 8 |
| hsa-miR-548i     | 302  | 8:1:1 | -4    | -6.25  | 2.25 | AAAAGU<br>AAUUGC TTTATTTT<br>GGAUUU TTTTCA<br>UGCC TTTT  | 8 |
| hsa-miR-548c-5p  | 658  | 8:1:1 | -4.3  | -6.56  | 2.26 | AAAAGU<br>AAUUGC ATTATAT<br>GGUUUU TCATAGT<br>UGCC A     | 8 |
| hsa-miR-548n     | 306  | 8:1:1 | -2.37 | -4.63  | 2.26 | CAAAAG<br>UAAUUG TTTTTTTT<br>UGGAUU TCATTTT<br>UUGU      | 8 |
| hsa-miR-101      | 846  | 8:1:1 | -5.8  | -8.07  | 2.27 | CAGUUA<br>UCACAG AGTATTA<br>UGCUGA TTATAAA<br>UGCU ATA   | 8 |
| hsa-miR-30e      | 771  | 8:1:0 | -5.8  | -8.07  | 2.27 | UGUAAA<br>CAUCCU ATGTTTT<br>UGACUG CAACAC<br>GAAG CATAT  | 8 |
| hsa-miR-374a     | 384  | 8:1:0 | -7.2  | -9.47  | 2.27 | UUAUAA<br>UACAAC GTATAAT<br>CUGAUA ATATATA<br>AGUG AATT  | 8 |
| hsa-miR-651      | 851  | 8:1:1 | -5.4  | -7.68  | 2.28 | UUUAGG<br>AUAAGC TATTATA<br>UUGACU AAATA<br>UUUG         | 8 |
| hsa-miR-219-1-3p | 776  | 8:1:1 | -7.6  | -9.88  | 2.28 | UGAUUG<br>UCCAAA TTCAACA<br>CGCAAU CCATATA<br>UCU C      | 8 |

|                 |      |       |       |        |      |                                          |                             |   |
|-----------------|------|-------|-------|--------|------|------------------------------------------|-----------------------------|---|
| hsa-miR-1303    | 261  | 8:1:1 | -6.3  | -8.58  | 2.28 | UUUAGA<br>GACGGG<br>GUCUUG<br>CUCU       | ATTTCTA<br>AATATAT          | 8 |
| hsa-miR-374a    | 1101 | 8:1:0 | -9    | -11.29 | 2.29 | UUUAUA<br>UACAAC<br>CUGAUA<br>AGUG       | GTATAAT<br>AATATAT<br>TTATT | 8 |
| hsa-miR-548a-5p | 372  | 8:1:1 | -2.7  | -4.99  | 2.29 | AAAAGU<br>AAUUGC<br>GAGUUU<br>UACC       | TTTATTTT<br>GTTTGTA<br>TAA  | 8 |
| hsa-miR-548c-5p | 372  | 8:1:1 | -2.7  | -4.99  | 2.29 | AAAAGU<br>AAUUGC<br>GGUUUU<br>UGCC       | TTTATTTT<br>GTTTGTA         | 8 |
| hsa-miR-548j    | 372  | 8:1:1 | -2.7  | -4.99  | 2.29 | AAAAGU<br>AAUUGC<br>GGUCUU<br>UGGU       | TTTATTTT<br>GTTTGTA<br>TA   | 8 |
| hsa-miR-548h    | 372  | 8:1:1 | -2.7  | -4.99  | 2.29 | AAAAGU<br>AAUCGC<br>GGUUUU<br>UGUC       | TTTATTTT<br>GTTT            | 8 |
| hsa-miR-586     | 1271 | 8:1:1 | -8.4  | -10.7  | 2.3  | UAUGCA<br>UUGUAU<br>UUUUAG<br>GUCC       | GAATGT<br>ATTATGT<br>AATAG  | 8 |
| hsa-miR-1185    | 919  | 8:1:1 | -8.9  | -11.2  | 2.3  | AGAGGA<br>UACCCU<br>UUGUAU<br>GUU        | ATATCCT<br>TTTTTTTT<br>T    | 8 |
| hsa-miR-374a    | 1096 | 8:1:1 | -8.2  | -10.51 | 2.31 | UUUAUA<br>UACAAC<br>CUGAUA<br>AGUG       | TTATTGT<br>ATAATAA<br>TAT   | 8 |
| hsa-miR-425     | 402  | 8:1:1 | -4.8  | -7.12  | 2.32 | AAUGAC<br>ACGAUC<br>ACUCCC<br>GUUGA      | CGTTTTA<br>TTTTGTT<br>T     | 8 |
| hsa-miR-1259    | 361  | 8:1:1 | -3.1  | -5.42  | 2.32 | UCCUG<br>AGACCC<br>UUUAAC<br>CUGUGA      | AATATAT<br>AATTTTT<br>AT    | 8 |
| hsa-miR-494     | 1059 | 8:1:1 | -6.7  | -9.06  | 2.36 | AGGUUG<br>UCCGUG<br>UUGUCU<br>UCUCU      | TGTTTTT<br>CCA              | 8 |
| hsa-miR-151-3p  | 827  | 8:1:1 | -3.3  | -5.66  | 2.36 | UCGAGG<br>AGCUCA<br>CAGUCU<br>AGU        | TTAATCT<br>AATC             | 8 |
| hsa-miR-1267    | 776  | 8:1:0 | -7.5  | -9.88  | 2.38 | CCUGUU<br>GAAGUG<br>UAAUCC<br>CCA        | TTCAACA<br>CCATA            | 8 |
| hsa-miR-548p    | 331  | 8:1:1 | -1.92 | -4.3   | 2.38 | UAGCAA<br>AAACUG<br>CAGUUA<br>CUUU       | TTTTTTTT<br>AAATGTC<br>ATT  | 8 |
| hsa-miR-203     | 259  | 8:1:1 | -7.1  | -9.5   | 2.4  | AGUGGU<br>UCUUA<br>CAGUUC<br>AACAGU<br>U | ATATTTT<br>TAAATAT<br>ATT   | 8 |
| hsa-miR-570     | 945  | 8:1:1 | -4.6  | -7.03  | 2.43 | AAAGGU<br>AAUUGC<br>AGUUUU<br>UCCC       | TTGTATT<br>CATA             | 8 |

|                 |      |       |      |        |      |                                              |                            |   |
|-----------------|------|-------|------|--------|------|----------------------------------------------|----------------------------|---|
| hsa-miR-548p    | 942  | 8:1:1 | -4.8 | -7.24  | 2.44 | UAGCAA<br>AAACUG<br>CAGUUA<br>CUUU<br>GGCUAC | TTTTTGT<br>ATTCA           | 8 |
| hsa-miR-187     | 1226 | 8:1:0 | -7.6 | -10.05 | 2.45 | AACACA<br>GGACCC<br>GGGC<br>CCUCUA           | AATACA<br>CGTTATG<br>ATTAT | 8 |
| hsa-miR-520f    | 1003 | 8:1:1 | -8.2 | -10.65 | 2.45 | AAGGGA<br>AGCGCU<br>UUCU<br>CUAAUA           | GAAGAA<br>TTTTTTT          | 8 |
| hsa-miR-633     | 848  | 8:0:1 | -5.4 | -7.86  | 2.46 | GUAUCU<br>ACCACA<br>AUAAA<br>AAAUUA          | TATTATT<br>ATAA            | 8 |
| hsa-miR-944     | 1222 | 8:1:1 | -5.7 | -8.17  | 2.47 | UUGUAC<br>AUCGGA<br>UGAG<br>GGUGGA           | TAATAAT<br>ACACGTT         | 8 |
| hsa-miR-376c    | 415  | 8:1:1 | -6.3 | -8.78  | 2.48 | UAUJCC<br>UUCUAU<br>GUU<br>UCCCCUG           | TTCTATT<br>TGACAC<br>A     | 8 |
| hsa-miR-1259    | 1242 | 8:1:0 | -6   | -8.51  | 2.51 | AGACCC<br>UUUAAC<br>CUGUGA<br>UUUUUG         | ATAATAT<br>ATTT            | 8 |
| hsa-miR-137     | 1208 | 8:1:0 | -6.1 | -8.61  | 2.51 | CUUAAG<br>AAUACG<br>CGUAG<br>UAAUUU          | AAGAAA<br>TATATA           | 8 |
| hsa-miR-590-3p  | 364  | 8:1:0 | -2.4 | -4.95  | 2.55 | UAUGUA<br>UAAGCU<br>AGU<br>UUUUGG            | ATATAAT<br>TTTTATTT<br>TG  | 8 |
| hsa-miR-584     | 876  | 8:1:1 | -7.6 | -10.17 | 2.57 | UUUGCC<br>UGGGAC<br>UGAG<br>UCUAUA           | ATATCAT<br>ATATAAT<br>AAT  | 8 |
| hsa-miR-1284    | 96   | 8:1:1 | -6.5 | -9.07  | 2.57 | CAGACC<br>CUGGCU<br>UUUC<br>ACUUUA           | TTGTATA<br>ATATA           | 8 |
| hsa-miR-302b    | 1004 | 8:1:1 | -8.3 | -10.89 | 2.59 | ACAUGG<br>AAGUGC<br>UUUC<br>AAAAGU           | AAGAATT<br>TTTTT           | 8 |
| hsa-miR-548b-5p | 849  | 8:1:1 | -5.2 | -7.79  | 2.59 | AAUUGU<br>GGUUUU<br>GGCC<br>UAUUGC           | ATTATTA<br>TAAAATA<br>G    | 8 |
| hsa-miR-92a     | 868  | 8:1:1 | -4.6 | -7.2   | 2.6  | ACUUGU<br>CCCGGC<br>CUGU<br>AGGGAC           | AATGTAA<br>TAT             | 8 |
| hsa-miR-92b     | 868  | 8:1:1 | -4.6 | -7.2   | 2.6  | GGGACG<br>CGGUGC<br>AGUG<br>AGGUUG           | AATGTAA<br>TATATCA         | 8 |
| hsa-miR-494     | 770  | 8:1:1 | -5.7 | -8.3   | 2.6  | UCCGUG<br>UUGUCU<br>UCUCU<br>AGGUUG          | AATGTTT<br>TCAACA<br>CCA   | 8 |
| hsa-miR-656     | 812  | 8:1:0 | -3.8 | -6.41  | 2.61 | CCUGUG<br>AGGUGU<br>UCA                      | TATAATA<br>ATAA            | 8 |

|                 |      |       |       |        |      |                                     |                             |   |
|-----------------|------|-------|-------|--------|------|-------------------------------------|-----------------------------|---|
| hsa-miR-584     | 780  | 8:1:0 | -7.35 | -9.96  | 2.61 | UUAUGG<br>UUUGCC<br>UGGGAC<br>UGAG  | ACACCA<br>TATACG<br>GATA    | 8 |
| hsa-miR-1297    | 457  | 8:1:1 | -8.9  | -11.51 | 2.61 | UUCAAG<br>UAAUUC<br>AGGUG           | TTATTTG<br>TATAATA<br>TATAT | 8 |
| hsa-miR-26a     | 41   | 8:1:0 | -8.38 | -11    | 2.62 | UUCAAG<br>UAAUCC<br>AGGAUA<br>GGCU  | TTACTTG<br>TTTATTTT<br>TTTT | 8 |
| hsa-miR-1277    | 474  | 8:1:1 | -9.7  | -12.34 | 2.64 | AAAUAU<br>AUUAU<br>AUAUGU<br>ACGUAU | ATATATG<br>TTTTATTT<br>TGT  | 8 |
| hsa-miR-548b-5p | 405  | 8:1:1 | -4.1  | -6.74  | 2.64 | AAAAGU<br>AAUUGU<br>GGUUUU<br>GGCC  | TTTTATTT<br>GTTTCTA<br>T    | 8 |
| hsa-miR-548p    | 330  | 8:1:1 | -1.62 | -4.26  | 2.64 | UAGCAA<br>AAACUG<br>CAGUUA<br>CUUU  | TTTTTTTT<br>TAAATG          | 8 |
| hsa-miR-137     | 1280 | 8:1:1 | -7.8  | -10.45 | 2.65 | UUUAUG<br>CUUAAG<br>AAUACG<br>CGUAG | ATGTAAT<br>AGTA             | 8 |
| hsa-miR-381     | 1097 | 8:1:1 | -7.7  | -10.35 | 2.65 | AGCGAG<br>GUUGCC<br>CUUUGU<br>AUAU  | TATTGTA<br>TAATA            | 8 |
| hsa-miR-337-3p  | 785  | 8:1:1 | -5.5  | -8.17  | 2.67 | CUCCUA<br>UAUGAU<br>GCCUUU<br>CUUC  | ATATACG<br>GATATAT<br>CAA   | 8 |
| hsa-miR-520c-3p | 1004 | 8:1:1 | -8.2  | -10.89 | 2.69 | AAAGUG<br>CUUCCU<br>UUUAGA<br>GGGU  | AAGAATT<br>TTTTTTTA<br>ACGC | 8 |
| hsa-miR-491-3p  | 564  | 8:1:1 | -9.5  | -12.19 | 2.69 | CUUAUG<br>CAAGAU<br>UCCCUU<br>CUAC  | TTGTATA<br>TATAAAT<br>TTGT  | 8 |
| hsa-miR-191     | 398  | 8:1:1 | -4.7  | -7.39  | 2.69 | CAACGG<br>AAUCCC<br>AAAAGC<br>AGCUG | AATTCGT<br>TTTATTTT         | 8 |
| hsa-miR-367     | 868  | 8:1:1 | -4.5  | -7.2   | 2.7  | ACUGUU<br>GCJAAU<br>AUGCAA<br>CUCU  | AATGTAA<br>TAT              | 8 |
| hsa-miR-576-5p  | 608  | 8:1:0 | -6.6  | -9.32  | 2.72 | AUUCUA<br>AUUUCU<br>CCACGU<br>CUUU  | AAATAG<br>AAAAAA<br>AAAGAA  | 8 |
| hsa-miR-655     | 822  | 8:1:0 | -4.4  | -7.13  | 2.73 | AGAGGU<br>UAUCCG<br>UGUUAU<br>GUUC  | ATGAATT<br>AATCTAA<br>TCTTA | 8 |
| hsa-miR-1259    | 782  | 8:1:0 | -5.7  | -8.44  | 2.74 | UCCUG<br>AGACCC<br>UUUAAC<br>CUGUGA | ACCATAT<br>ACGGA            | 8 |
| hsa-miR-576-3p  | 501  | 8:1:1 | -9.1  | -11.84 | 2.74 | AAGAUG<br>UGGAAA<br>AAUUGG<br>AAUC  | ACACATT<br>TGATTAT<br>T     | 8 |

|                 |      |       |       |        |      |                                                                   |   |
|-----------------|------|-------|-------|--------|------|-------------------------------------------------------------------|---|
| hsa-miR-548b-5p | 35   | 8:0:1 | -5.7  | -8.44  | 2.74 | AAAAGU<br>AAUUGU ATTATTT<br>GGUUUU TACT                           | 8 |
| hsa-miR-548h    | 35   | 8:0:1 | -5.7  | -8.44  | 2.74 | AAAAGU<br>AAUCGC ATTATTT<br>GGUUUU TACT                           | 8 |
| hsa-miR-641     | 549  | 8:1:1 | -7.1  | -9.87  | 2.77 | UGUC<br>AAAGAC<br>AUAGGA TTTGTTT<br>UAGAGU TTG                    | 8 |
| hsa-miR-300     | 94   | 8:1:1 | -6.8  | -9.57  | 2.77 | CACCUC<br>UAUACA<br>AGGGCA ATTTGTA<br>GACUCU TAATATA<br>CUCU AATA | 8 |
| hsa-miR-651     | 828  | 8:1:1 | -3.1  | -5.88  | 2.78 | UUUAGG<br>AUAAGC TAATCTA<br>UUGACU ATCTTAC<br>UUUG A              | 8 |
| hsa-miR-337-5p  | 398  | 8:1:1 | -4.61 | -7.39  | 2.78 | GAACGG<br>CUUCAU AATTCGT<br>ACAGGA TTTATTTT<br>GUU                | 8 |
| hsa-miR-548p    | 329  | 8:1:1 | -1.22 | -4     | 2.78 | UAGCAA<br>AAACUG TTTTTTTT<br>CAGUUA TTAAATG<br>CUUU TC            | 8 |
| hsa-miR-382     | 1004 | 8:1:1 | -8.1  | -10.89 | 2.79 | GAAGUU<br>GUUCGU AAGAATT<br>GGUGGA TTTTTTTT<br>UUCG               | 8 |
| hsa-miR-374b    | 728  | 8:1:0 | -5    | -7.79  | 2.79 | AUAUAA<br>UACAAC TTATTAT<br>CUGCUA ATATA<br>AGUG                  | 8 |
| hsa-miR-25      | 868  | 8:1:1 | -4.4  | -7.2   | 2.8  | AGGCGG<br>AGACUU AATGTAA<br>GGGCAA TAT<br>UUG                     | 8 |
| hsa-miR-561     | 982  | 8:1:1 | -5.5  | -8.31  | 2.81 | AUCAAG<br>GAUCUU TAAATTC<br>AAACUU TTTT<br>UGCC                   | 8 |
| hsa-miR-524-5p  | 210  | 8:1:1 | -7.2  | -10.01 | 2.81 | CUACAA<br>AGGGAA TATTTGT<br>GCACUU AAATATA<br>UCUC TAT            | 8 |
| hsa-miR-568     | 177  | 8:1:1 | -10.9 | -13.71 | 2.81 | AUGUAU<br>AAAUGU TATATAT<br>AUACAC AATTTG<br>AC                   | 8 |
| hsa-miR-1270    | 87   | 8:1:1 | -7.7  | -10.51 | 2.81 | CUGGAG<br>AUAUGG TATATTC<br>AAGAGC ATTT<br>UGUGU                  | 8 |
| hsa-miR-524-5p  | 435  | 8:1:1 | -7    | -9.83  | 2.83 | CUACAA<br>AGGGAA TATTTGT<br>GCACUU ATATAT<br>UCUC                 | 8 |
| hsa-miR-380     | 729  | 8:0:1 | -5.1  | -7.94  | 2.84 | UGGUUG<br>ACCAUA TATTATA<br>GAACAU TAT<br>GCGC                    | 8 |
| hsa-miR-655     | 1273 | 8:0:0 | -7.2  | -10.05 | 2.85 | AGAGGU<br>UAUCCG ATGTATT<br>UGUUAU ATGTAAT<br>GUUC AGT            | 8 |

|                 |      |       |       |        |      |                                              |                             |   |
|-----------------|------|-------|-------|--------|------|----------------------------------------------|-----------------------------|---|
| hsa-miR-374b    | 675  | 8:1:0 | -9.2  | -12.05 | 2.85 | AUAUAA<br>UACAAC<br>CUGCUA<br>AGUG<br>CAGCAG | ATATTAT<br>ATGGTTC          | 8 |
| hsa-miR-424     | 411  | 8:1:1 | -4.7  | -7.55  | 2.85 | CAAUUC<br>AUGUUU<br>UGAA<br>UAGGUU           | TTGTTTC<br>TATTTGA          | 8 |
| hsa-miR-154     | 1193 | 8:1:1 | -6.6  | -9.46  | 2.86 | AUCCGU<br>GUUGCC<br>UUCG<br>AUGUAU           | CATAACT<br>TCTATTT<br>TAAGA | 8 |
| hsa-miR-568     | 950  | 8:1:0 | -4.6  | -7.46  | 2.86 | AAAUGU<br>AUACAC<br>AC<br>GAGCUU             | TTCATAC<br>ATACT            | 8 |
| hsa-miR-590-5p  | 842  | 8:1:1 | -5.1  | -7.96  | 2.86 | AUJCAU<br>AAAAGU<br>GCAG<br>UGGAUU           | AATAAGT<br>ATTATT           | 8 |
| hsa-miR-876-5p  | 395  | 8:1:1 | -4.6  | -7.47  | 2.87 | UCUUUG<br>UGAAUC<br>ACCA<br>UUUGUU           | ATAAATT<br>CGT              | 8 |
| hsa-miR-375     | 1031 | 8:1:1 | -8.26 | -11.14 | 2.88 | CGUUCG<br>GCUCGC<br>GUGA<br>UUAUAA           | ACGTATA<br>AAATAA<br>AA     | 8 |
| hsa-miR-374a    | 728  | 8:1:0 | -4.9  | -7.79  | 2.89 | UACAAC<br>CUGAUA<br>AGUG<br>AACAUU           | TTATTAT<br>ATATATA          | 8 |
| hsa-miR-181c    | 1269 | 8:1:0 | -8.5  | -11.4  | 2.9  | CAACCU<br>GUCGGU<br>GAGU<br>AUGGAU           | TAGAAT<br>GTATTAT<br>GTAA   | 8 |
| hsa-miR-1261    | 1061 | 8:1:1 | -5.7  | -8.6   | 2.9  | AAGGCU<br>UUGGCU<br>U<br>AUGUAU              | TTTTTCC<br>ATAGTAT<br>ATAT  | 8 |
| hsa-miR-568     | 736  | 8:1:1 | -5.8  | -8.71  | 2.91 | AAAUGU<br>AUACAC<br>AC<br>UACUCA             | TATATAT<br>ATATAT           | 8 |
| hsa-miR-888     | 323  | 8:1:0 | -4.8  | -7.71  | 2.91 | AAAAGC<br>UGUCAG<br>UCA<br>AAAGAC            | TTTTGAT<br>TTTT             | 8 |
| hsa-miR-641     | 451  | 8:1:1 | -8.2  | -11.12 | 2.92 | AUAGGA<br>UAGAGU<br>CACCUC<br>AAAAGU         | TTTGTTT<br>TATTTGT          | 8 |
| hsa-miR-548i    | 658  | 8:1:1 | -3.6  | -6.56  | 2.96 | AAUUGC<br>GGAUUU<br>UGCC<br>UAAUUG           | ATTATAT<br>TCATAGT          | 8 |
| hsa-miR-302f    | 1128 | 8:1:1 | -9.5  | -12.47 | 2.97 | CUUCCA<br>UGUUU<br>AAAAGU                    | TAGTAAT<br>TAATT            | 8 |
| hsa-miR-548b-5p | 353  | 8:1:1 | -2.4  | -5.37  | 2.97 | AAUUGU<br>GGUUUU<br>GGCC<br>AAAAGU           | ATAATTT<br>TAATATA<br>TAA   | 8 |
| hsa-miR-548a-5p | 353  | 8:1:1 | -2.4  | -5.37  | 2.97 | AAUUGC<br>GAGUUU<br>UACC                     | ATAATTT<br>TAATAT           | 8 |

|                 |     |       |       |        |      |                                              |                           |   |
|-----------------|-----|-------|-------|--------|------|----------------------------------------------|---------------------------|---|
| hsa-miR-301b    | 38  | 8:1:1 | -7    | -9.97  | 2.97 | GCUCUG<br>ACGAGG<br>UUGCAC<br>UACU<br>UAGGUU | ATTTTAC<br>TTGTT          | 8 |
| hsa-miR-154     | 918 | 8:1:0 | -8.3  | -11.29 | 2.99 | AUCCGU<br>GUUGCC<br>UUCG                     | GATATCC<br>TTTTTTTT       | 8 |
| hsa-miR-656     | 365 | 8:1:0 | -1.7  | -4.7   | 3    | AGGUUG<br>CCUGUG<br>AGGUGU<br>UCA            | TATAATT<br>TTTATTTT<br>G  | 8 |
| hsa-miR-656     | 358 | 8:1:0 | -2.4  | -5.4   | 3    | AGGUUG<br>CCUGUG<br>AGGUGU<br>UCA            | TTTAATA<br>TATAA          | 8 |
| hsa-miR-577     | 329 | 8:1:1 | -1    | -4     | 3    | UAGAUA<br>AAAUAU<br>UGGUAC<br>CUG            | TTTTTTTT<br>TT            | 8 |
| hsa-miR-323-3p  | 870 | 8:1:0 | -5.5  | -8.51  | 3.01 | AGGUGG<br>UCCGUG<br>GCGCGU<br>UCGC           | TGTAATA<br>TATC           | 8 |
| hsa-miR-656     | 464 | 8:0:0 | -9.7  | -12.71 | 3.01 | AGGUUG<br>CCUGUG<br>AGGUGU<br>UCA            | TATAATA<br>TATATAT<br>AT  | 8 |
| hsa-miR-496     | 709 | 8:1:0 | -8.4  | -11.42 | 3.02 | UGAGUA<br>UUACAU<br>GGCCAA<br>UCUC           | TAATACA<br>CTAAAAT<br>A   | 8 |
| hsa-miR-590-5p  | 697 | 8:0:0 | -10.3 | -13.36 | 3.06 | GAGCUU<br>AUUCAU<br>AAAAGU<br>GCAG           | AATAAG<br>CTAATA          | 8 |
| hsa-miR-548i    | 328 | 8:1:1 | -1    | -4.06  | 3.06 | AAAAGU<br>AAUUGC<br>GGUUUU<br>UGCC           | ATTTTTTT<br>TTTAAAT       | 8 |
| hsa-miR-548l    | 296 | 8:0:1 | -5    | -8.06  | 3.06 | AAAAGU<br>AAUUGC<br>GGUUUU<br>UGUC           | AATATTT<br>TTATTTTT       | 8 |
| hsa-miR-1       | 114 | 8:1:1 | -8    | -11.06 | 3.06 | ACAUAC<br>UUCUUU<br>AUAUGC<br>CCAU           | TATATTC<br>ATAGTAT<br>ATA | 8 |
| hsa-miR-206     | 114 | 8:1:1 | -8    | -11.06 | 3.06 | UGGAUU<br>GUAAGG<br>AAGUGU<br>GUGG           | TATATTC<br>ATA            | 8 |
| hsa-miR-30d     | 771 | 8:1:0 | -5    | -8.07  | 3.07 | UGUAAA<br>CAUCCC<br>CGACUG<br>GAAG           | ATGTTTT<br>CAA            | 8 |
| hsa-miR-548c-5p | 353 | 8:1:1 | -2.3  | -5.37  | 3.07 | AAAAGU<br>AAUUGC<br>GGUUUU<br>UGCC           | ATAATTT<br>TAAT           | 8 |
| hsa-miR-548j    | 353 | 8:1:1 | -2.3  | -5.37  | 3.07 | AAAAGU<br>AAUUGC<br>GGUCUU<br>UGGU           | ATAATTT<br>TAATA          | 8 |
| hsa-miR-301a    | 38  | 8:1:1 | -6.9  | -9.97  | 3.07 | GCUCUG<br>ACUUUA<br>UUGCAC<br>UACU           | ATTTTAC<br>TTGTTT         | 8 |

|                 |      |       |       |        |      |                                              |                             |   |
|-----------------|------|-------|-------|--------|------|----------------------------------------------|-----------------------------|---|
| hsa-miR-579     | 1046 | 8:1:1 | -7.1  | -10.18 | 3.08 | UCGCGG<br>UUUGUG<br>CCAGAU<br>GACG<br>AUGUAU | ATAAATG<br>ATT              | 8 |
| hsa-miR-568     | 359  | 8:1:1 | -2.5  | -5.59  | 3.09 | AAAUGU<br>AUACAC<br>AC<br>CAAAGA             | TTAATAT<br>ATAA             | 8 |
| hsa-miR-186     | 305  | 8:1:1 | -1.4  | -4.49  | 3.09 | AUUCUC<br>CUUUUG<br>GGCU<br>UUCAAG           | ATTTTTTT<br>TTCATT          | 8 |
| hsa-miR-26a     | 1247 | 8:1:1 | -6    | -9.11  | 3.11 | JAAUCC<br>AGGAUA<br>GGCU<br>UGUAAA           | ATATTTG<br>AATAAC           | 8 |
| hsa-miR-30e     | 1236 | 8:1:1 | -5.37 | -8.48  | 3.11 | CAUCCU<br>UGACUG<br>GAAG                     | ATGATTA<br>TAATATA<br>TTTG  | 8 |
| hsa-miR-137     | 869  | 8:1:1 | -5.05 | -8.18  | 3.13 | UUUUUG<br>CUUAAAG<br>AAUACG<br>CGUAG         | ATGTAAT<br>ATATCAT<br>ATA   | 8 |
| hsa-miR-548c-5p | 302  | 8:1:1 | -3.1  | -6.25  | 3.15 | AAAAGU<br>AAUUGC<br>GGUUUU<br>UGCC           | TTTTTTTT<br>TTTTTCA<br>TTT  | 8 |
| hsa-miR-548j    | 302  | 8:1:1 | -3.1  | -6.25  | 3.15 | AAAAGU<br>AAUUGC<br>GGUCUU<br>UGGU           | TTTTTTTT<br>TTTTTC          | 8 |
| hsa-miR-381     | 436  | 8:1:1 | -6.8  | -9.96  | 3.16 | AGCGAG<br>GUUGCC<br>CUUUGU<br>AUAU           | ATTTGTA<br>TATATA           | 8 |
| hsa-miR-548a-5p | 328  | 8:1:1 | -0.9  | -4.06  | 3.16 | AAAAGU<br>AAUUGC<br>GAGUUU<br>UACC           | TTTTTTTT<br>TTTAAAT<br>GTCA | 8 |
| hsa-miR-381     | 94   | 8:1:1 | -6.4  | -9.57  | 3.17 | AGCGAG<br>GUUGCC<br>CUUUGU<br>AUAU           | ATTTGTA<br>TAAT             | 8 |
| hsa-miR-607     | 1248 | 8:1:0 | -7.5  | -10.69 | 3.19 | GUUCA<br>AUCCAG<br>AUCUAU<br>AAC             | TATTTGA<br>ATAACAT          | 8 |
| hsa-miR-548g    | 365  | 8:1:1 | -1.5  | -4.7   | 3.2  | UGCAAA<br>AGUAAU<br>UGCAGU<br>UUUUG          | TATAATT<br>TTTA             | 8 |
| hsa-miR-429     | 667  | 8:1:1 | -6.66 | -9.87  | 3.21 | UAAUAC<br>UGUCUG<br>GUAAAA<br>CCGU           | ATAGTA<br>GTATAT            | 8 |
| hsa-miR-892a    | 500  | 8:1:0 | -8.6  | -11.81 | 3.21 | CACUGU<br>GUCCUU<br>UCUGCG<br>UAG            | GACACA<br>TTTGAT            | 8 |
| hsa-miR-1279    | 1275 | 8:1:1 | -6.9  | -10.12 | 3.22 | UCAUUAU<br>UGCUUC<br>UUUCU                   | GTATTAT<br>GTAATA<br>GTA    | 8 |
| hsa-miR-655     | 845  | 8:1:0 | -5    | -8.24  | 3.24 | AGAGGU<br>UAUCCG<br>UGUUUAU<br>GUUC          | AAGTATT<br>ATTATAA<br>AAT   | 8 |

|                 |      |       |       |        |      |                                              |                             |   |
|-----------------|------|-------|-------|--------|------|----------------------------------------------|-----------------------------|---|
| hsa-miR-190     | 873  | 8:0:1 | -7.6  | -10.85 | 3.25 | UGAUAU<br>GUUUGA<br>UAUAAU<br>AGGU<br>CAAAAG | AATATAT<br>CAT              | 8 |
| hsa-miR-548n    | 434  | 8:1:1 | -6.2  | -9.45  | 3.25 | UAAUUG<br>UGGAUU<br>UUGU<br>CAAAAG           | TTATTTG<br>TAT              | 8 |
| hsa-miR-548n    | 326  | 8:1:1 | -2.5  | -5.75  | 3.25 | UAAUUG<br>UGGAUU<br>UUGU                     | TGATTTT<br>TTTT             | 8 |
| hsa-miR-155     | 848  | 8:1:1 | -4.6  | -7.86  | 3.26 | UUAAUG<br>CUAAUC<br>GUGAUA<br>GGGGU          | TATTATT<br>ATAAAAT<br>A     | 8 |
| hsa-miR-30b     | 299  | 8:1:1 | -4.54 | -7.8   | 3.26 | UGUAAA<br>CAUCCU<br>ACACUC<br>AGCU           | ATTTTTA<br>TTTTTTTT<br>TCA  | 8 |
| hsa-miR-448     | 93   | 8:1:1 | -7.1  | -10.36 | 3.26 | UUGCAU<br>AUGUAG<br>GAUGUC<br>CCAU           | CATTTGT<br>ATAATAT<br>AAA   | 8 |
| hsa-miR-500     | 844  | 8:1:1 | -5    | -8.27  | 3.27 | UUGCUA<br>CCUGGG<br>UGAGA<br>AAAAGU          | TAAGTAT<br>TATTA            | 8 |
| hsa-miR-548b-5p | 318  | 8:1:1 | -4.4  | -7.68  | 3.28 | AAUUGU<br>GGUUUU<br>GGCC<br>AAAAGU           | TTTATTTT<br>TGATTTT         | 8 |
| hsa-miR-548d-5p | 318  | 8:1:1 | -4.4  | -7.68  | 3.28 | AAUUGU<br>GGUUUU<br>UGCC                     | TTTATTTT<br>TG              | 8 |
| hsa-miR-520b    | 1004 | 8:1:1 | -7.6  | -10.89 | 3.29 | AAAGUG<br>CUUCCU<br>UUUAGA<br>GGG            | AAGAATT<br>TTTTTTTA<br>ACGC | 8 |
| hsa-miR-1324    | 416  | 8:1:1 | -5.85 | -9.17  | 3.32 | CCAGAC<br>AGAAUU<br>CUAUGC<br>ACUUUC         | TCTATTT<br>GACACA<br>TG     | 8 |
| hsa-miR-383     | 141  | 8:1:1 | -8.21 | -11.54 | 3.33 | AGAUCA<br>GAAGGU<br>GAUUGU<br>GGCU           | TTTTGAT<br>ATATTTG<br>TAT   | 8 |
| hsa-miR-577     | 1199 | 8:1:1 | -5.22 | -8.56  | 3.34 | UAGAUA<br>AAAUAU<br>UGGUAC<br>CUG            | TTCTATT<br>TTAAGAA<br>AT    | 8 |
| hsa-miR-200b    | 1127 | 8:1:1 | -9.5  | -12.84 | 3.34 | CAUCUU<br>ACUGGG<br>CAGCAU<br>UGGA           | GTAGTA<br>ATTAATT           | 8 |
| hsa-miR-656     | 1276 | 8:1:1 | -7.4  | -10.75 | 3.35 | AGGUUG<br>CCUGUG<br>AGGUGU<br>UCA            | TATTATG<br>TAATAGT<br>A     | 8 |
| hsa-miR-1264    | 295  | 8:1:1 | -4.9  | -8.25  | 3.35 | CAAGUC<br>UUUUUU<br>GAGCAC<br>CUGUU          | TAATATT<br>TTT              | 8 |
| hsa-miR-609     | 1187 | 8:1:1 | -7.8  | -11.18 | 3.38 | AGGGUG<br>UUUCUC<br>UCAUCU<br>CU             | AAATAC<br>CATAAC            | 8 |

|                 |      |       |       |        |      |                                            |                            |   |
|-----------------|------|-------|-------|--------|------|--------------------------------------------|----------------------------|---|
| hsa-miR-577     | 317  | 8:0:1 | -4.3  | -7.68  | 3.38 | UAGAUU<br>AAAUU<br>UGGUAC<br>CUG<br>AAAAGU | TTTTATTT<br>TTGAT          | 8 |
| hsa-miR-548d-5p | 305  | 8:1:1 | -1.1  | -4.49  | 3.39 | AAUUGU<br>GGUUUU<br>UGCC<br>UUCAAG         | ATTTTTTT<br>TT             | 8 |
| hsa-miR-26b     | 1247 | 8:1:1 | -5.7  | -9.11  | 3.41 | UAAUUC<br>AGGAUA<br>GGU<br>UUCAAG          | ATATTTG<br>AATAAC<br>A     | 8 |
| hsa-miR-1297    | 1247 | 8:1:1 | -5.7  | -9.11  | 3.41 | UAAUUC<br>AGGUG<br>UCUAUA                  | ATATTTG<br>AATAAC<br>A     | 8 |
| hsa-miR-1284    | 438  | 8:1:1 | -6.7  | -10.12 | 3.42 | CAGACC<br>CUGGCU<br>UUUC<br>UUUUGC         | TTGTATA<br>TATAAAT<br>TT   | 8 |
| hsa-miR-507     | 1181 | 8:1:1 | -8.4  | -11.83 | 3.43 | ACCUUU<br>UGGAGU<br>GAA<br>UGAUAU          | GTTGTAA<br>AATACC          | 8 |
| hsa-miR-190b    | 388  | 8:1:1 | -3.95 | -7.39  | 3.44 | GUUUGA<br>UAUUGG<br>GUU<br>AAUGGA          | AATATAT<br>ATAAATT         | 8 |
| hsa-miR-1246    | 267  | 8:1:1 | -1.49 | -4.94  | 3.45 | UUUUUG<br>GAGCAG<br>G<br>UCCUG             | AAATATA<br>TTC             | 8 |
| hsa-miR-1259    | 658  | 8:1:1 | -3.1  | -6.56  | 3.46 | AGACCC<br>UUUAAC<br>CUGUGA<br>AAAAGU       | ATTATAT<br>TCATAGT<br>A    | 8 |
| hsa-miR-548h    | 353  | 8:1:1 | -1.9  | -5.37  | 3.47 | AAUCGC<br>GGUUUU<br>UGUC<br>AAAAGU         | ATAATTT<br>TAATATA<br>T    | 8 |
| hsa-miR-548i    | 353  | 8:1:1 | -1.9  | -5.37  | 3.47 | AAUUGC<br>GGUUUU<br>UGCC<br>AAAUU          | ATAATTT<br>TAATATA<br>TAA  | 8 |
| hsa-miR-1277    | 596  | 8:1:1 | -8.45 | -11.93 | 3.48 | AUAUUA<br>AUAUGU<br>ACGUUU<br>UAAUUU       | ATGTATG<br>TGATTAA<br>AT   | 8 |
| hsa-miR-590-3p  | 572  | 8:1:0 | -7.1  | -10.58 | 3.48 | UAUGUA<br>UAAGCU<br>AGU<br>UGCAA           | ATAAATT<br>TGTTTA<br>TTTG  | 8 |
| hsa-miR-548f    | 366  | 8:1:1 | -1.1  | -4.59  | 3.49 | AGUAAU<br>CACAGU<br>UUUU<br>AACAUU         | ATAATTT<br>TTATTTT<br>GTTT | 8 |
| hsa-miR-181a    | 1269 | 8:1:0 | -7.9  | -11.4  | 3.5  | CAACGC<br>UGUCGG<br>UGAGU<br>UGGAUU        | TAGAAT<br>GTATT            | 8 |
| hsa-miR-876-5p  | 995  | 8:1:1 | -6.8  | -10.3  | 3.5  | UCUUUG<br>UGAAUC<br>ACCA<br>UCAAAA         | AGAAAT<br>ATGAAG<br>A      | 8 |
| hsa-miR-1323    | 320  | 8:1:1 | -4.2  | -7.7   | 3.5  | CUGAGG<br>GGCAUU<br>UUUC                   | TATTTTT<br>GATTTTT         | 8 |

|                 |      |       |       |        |      |                                     |                             |   |
|-----------------|------|-------|-------|--------|------|-------------------------------------|-----------------------------|---|
| hsa-miR-26b     | 41   | 8:1:0 | -7.5  | -11    | 3.5  | UUCAAG<br>UAAUUC<br>AGGAUA<br>GGU   | TTACTTG<br>TTTATTTT<br>TTT  | 8 |
| hsa-miR-876-5p  | 981  | 8:1:1 | -4.95 | -8.47  | 3.52 | UGGAUU<br>UCUUUG<br>UGAAUC<br>ACCA  | ATAAATT<br>CTTTTAA<br>A     | 8 |
| hsa-miR-548e    | 400  | 8:1:1 | -2.8  | -6.33  | 3.53 | CAAAAG<br>CAAUCG<br>CGGUUU<br>UUGC  | TTCGTTT<br>TATTTTG<br>TTTCT | 8 |
| hsa-miR-137     | 845  | 8:1:1 | -4.7  | -8.24  | 3.54 | UUUUUG<br>CUUAAG<br>AAUACG<br>CGUAG | AAGTATT<br>ATT              | 8 |
| hsa-miR-374b    | 850  | 8:1:0 | -4.2  | -7.75  | 3.55 | AUAUAA<br>UACAAC<br>CUGCUA<br>AGUG  | TTATTAT<br>AAA              | 8 |
| hsa-miR-522     | 719  | 8:1:1 | -2.86 | -6.41  | 3.55 | CUCUAG<br>AGGGAA<br>GCGCUU<br>UCUG  | AAATATT<br>TCTTATT<br>ATA   | 8 |
| hsa-miR-137     | 994  | 8:1:0 | -6.6  | -10.16 | 3.56 | UUUUUG<br>CUUAAG<br>AAUACG<br>CGUAG | AAGAAA<br>TATGAA<br>GAATTT  | 8 |
| hsa-miR-944     | 886  | 8:0:1 | -8.5  | -12.06 | 3.56 | AAUUUA<br>UUGUAC<br>AUCGGA<br>UGAG  | TAATAAT<br>TGTATTG          | 8 |
| hsa-miR-568     | 471  | 8:1:1 | -8.6  | -12.16 | 3.56 | AUGUAU<br>AAAUGU<br>AUACAC<br>AC    | TATATAT<br>ATGTT            | 8 |
| hsa-miR-491-3p  | 1064 | 8:1:1 | -3.2  | -6.77  | 3.57 | CUUAUG<br>CAAGAU<br>UCCCUU<br>CUAC  | TTCCATA<br>GTATATA<br>TAATG | 8 |
| hsa-miR-548d-5p | 353  | 8:1:1 | -1.8  | -5.37  | 3.57 | AAAAGU<br>AAUUGU<br>GGUUUU<br>UGCC  | ATAATTT<br>TAA              | 8 |
| hsa-miR-130b    | 38   | 8:1:1 | -6.4  | -9.97  | 3.57 | ACUCUU<br>UCCUG<br>UUGCAC<br>UAC    | ATTTTAC<br>TTGTTTA<br>TTTTT | 8 |
| hsa-miR-374a    | 589  | 8:1:0 | -8.2  | -11.78 | 3.58 | UUUUUA<br>UACAAC<br>CUGAUA<br>AGUG  | GTATAAT<br>ATGTATG<br>TGATT | 8 |
| hsa-miR-548h    | 849  | 8:1:1 | -4.2  | -7.79  | 3.59 | AAAAGU<br>AAUCGC<br>GGUUUU<br>UGUC  | ATTATTA<br>TAAAAT           | 8 |
| hsa-miR-1253    | 725  | 8:1:1 | -4    | -7.59  | 3.59 | AGAGAA<br>GAAGAU<br>CAGCCU<br>GCA   | TTCTTAT<br>TATATA           | 8 |
| hsa-miR-491-3p  | 152  | 8:0:1 | -7.1  | -10.7  | 3.6  | CUUAUG<br>CAAGAU<br>UCCCUU<br>CUAC  | TTGTATA<br>ATAAT            | 8 |
| hsa-miR-32      | 291  | 8:1:1 | -4.9  | -8.51  | 3.61 | UAUUGC<br>ACAUUA<br>CUAAGU<br>UGCA  | TGAGTA<br>ATAT              | 8 |

|                |      |       |       |        |      |                                              |                             |   |
|----------------|------|-------|-------|--------|------|----------------------------------------------|-----------------------------|---|
| hsa-miR-487a   | 913  | 8:1:0 | -7.82 | -11.45 | 3.63 | GUGGUU<br>AUCCCU<br>GCUGUG<br>UUCG<br>UAAAGU | TATATGA<br>TATCC            | 8 |
| hsa-miR-559    | 306  | 8:1:1 | -1    | -4.63  | 3.63 | AAAUAU<br>GCACCA<br>AAA<br>AGGUUG            | TTTTTTTT<br>TCATTTT<br>AT   | 8 |
| hsa-miR-656    | 293  | 8:1:1 | -4.8  | -8.43  | 3.63 | CCUGUG<br>AGGUGU<br>UCA<br>UUGCAU            | AGTAATA<br>TTT              | 8 |
| hsa-miR-448    | 1122 | 8:1:1 | -7.3  | -10.94 | 3.64 | AUGUAG<br>GAUGUC<br>CCAU<br>UAGCAA           | AATATGT<br>AGTA             | 8 |
| hsa-miR-548p   | 249  | 8:1:1 | -8.3  | -11.94 | 3.64 | AAACUG<br>CAGUUA<br>CUUU<br>AGAGGU           | TTTTTGT<br>ATAATAT<br>TTCT  | 8 |
| hsa-miR-655    | 1280 | 8:1:0 | -6.8  | -10.45 | 3.65 | UAUCCG<br>UGUUAU<br>GUUC<br>UAAUUU           | ATGTAAT<br>AGTA             | 8 |
| hsa-miR-590-3p | 1035 | 8:1:0 | -7.7  | -11.36 | 3.66 | UAUGUA<br>UAAGCU<br>AGU<br>UGGAUU            | ATAAAAT<br>AAAAAT<br>AAAT   | 8 |
| hsa-miR-876-5p | 1209 | 8:1:1 | -5.3  | -8.97  | 3.67 | UCUUUG<br>UGAAUC<br>ACCA<br>AAGAUG           | AGAAAT<br>ATATATA<br>TA     | 8 |
| hsa-miR-576-3p | 1192 | 8:1:1 | -6.2  | -9.87  | 3.67 | UGGAAA<br>AAUUGG<br>AAUC<br>GUGGUU           | CCATAA<br>CITCTAT<br>TTTAA  | 8 |
| hsa-miR-487b   | 153  | 8:1:1 | -6.6  | -10.28 | 3.68 | AUCCCU<br>GUCCUG<br>UUCG<br>AUUCUG           | TGTATAA<br>TAA              | 8 |
| hsa-miR-544    | 1001 | 8:1:0 | -6.3  | -10    | 3.7  | CAUUUU<br>UAGCAA<br>GUUC<br>AGGUUG           | ATGAAG<br>AATTTTT<br>TTTT   | 8 |
| hsa-miR-656    | 205  | 8:0:0 | -8.5  | -12.2  | 3.7  | CCUGUG<br>AGGUGU<br>UCA<br>UAAAGU            | TATAATA<br>TTTGTA<br>ATATA  | 8 |
| hsa-miR-559    | 1095 | 8:1:1 | -6.3  | -10.01 | 3.71 | AAAUAU<br>GCACCA<br>AAA<br>AGGUUG            | TTTATTG<br>TATAATA          | 8 |
| hsa-miR-656    | 870  | 8:0:1 | -4.8  | -8.51  | 3.71 | CCUGUG<br>AGGUGU<br>UCA<br>UUCAAG            | TGTAATA<br>TATCATA<br>TATAA | 8 |
| hsa-miR-26a    | 457  | 8:1:1 | -7.8  | -11.51 | 3.71 | UAAUCC<br>AGGAUA<br>GGCU<br>AGGUUG           | TTATTTG<br>TAT              | 8 |
| hsa-miR-656    | 807  | 8:0:0 | -4.7  | -8.42  | 3.72 | CCUGUG<br>AGGUGU<br>UCA<br>UUAUCA            | TATAATA<br>TAATAAT<br>AAT   | 8 |
| hsa-miR-361-5p | 357  | 8:1:1 | -1.6  | -5.32  | 3.72 | GAAUCU<br>CCAGGG<br>GUAC                     | TTTTAAT<br>ATATA            | 8 |

|                 |      |       |       |        |      |                                              |                             |   |
|-----------------|------|-------|-------|--------|------|----------------------------------------------|-----------------------------|---|
| hsa-miR-26a     | 511  | 8:1:1 | -11.1 | -14.84 | 3.74 | UUCAAG<br>UAAUCC<br>AGGAUA<br>GGCU<br>UUUAUA | TTATTTG<br>TATAT            | 8 |
| hsa-miR-374a    | 850  | 8:1:0 | -4    | -7.75  | 3.75 | UACAAC<br>CUGAUA<br>AGUG                     | TTATTAT<br>AAA              | 8 |
| hsa-miR-1297    | 417  | 8:1:1 | -5.6  | -9.35  | 3.75 | UUCAAG<br>UAAUUC<br>AGGUG<br>UAUACA          | CTATTTG<br>ACACAT<br>G      | 8 |
| hsa-miR-300     | 459  | 8:1:1 | -7.7  | -11.46 | 3.76 | AGGGCA<br>GACUCU<br>CUCU<br>AAGCAU           | ATTTGTA<br>TAA              | 8 |
| hsa-miR-1179    | 768  | 8:1:1 | -4.7  | -8.47  | 3.77 | UCUUUC<br>AUUGGU<br>UGG<br>GGUGCA            | AAAATGT<br>TTTC             | 8 |
| hsa-miR-143     | 91   | 8:1:1 | -7.3  | -11.07 | 3.77 | GUGCUG<br>CAUCUC<br>UGGU<br>UGGUUG           | TTCATTT<br>GTA              | 8 |
| hsa-miR-380     | 360  | 8:1:1 | -1.7  | -5.48  | 3.78 | ACCAUA<br>GAACAU<br>GCGC<br>AUGUAU           | TAATATA<br>TAA              | 8 |
| hsa-miR-568     | 173  | 8:1:1 | -8.1  | -11.88 | 3.78 | AAAUGU<br>AUACAC<br>AC<br>ACUUUA             | TATATAT<br>ATA              | 8 |
| hsa-miR-302d    | 1004 | 8:1:1 | -7.1  | -10.89 | 3.79 | ACAUGG<br>AGGCAC<br>UUGC<br>AAAAGU           | AAGAATT<br>TTTTTTTA<br>A    | 8 |
| hsa-miR-548j    | 849  | 8:1:1 | -4    | -7.79  | 3.79 | AAUUGC<br>GGUCUU<br>UGGU<br>UCCCCG           | ATTATTA<br>TAAAATA          | 8 |
| hsa-miR-1259    | 388  | 8:1:1 | -3.6  | -7.39  | 3.79 | AGACCC<br>UUUAAC<br>CUGUGA<br>GUGAGU         | AATATAT<br>ATA              | 8 |
| hsa-miR-1238    | 1001 | 8:1:1 | -6.2  | -10    | 3.8  | GGGAGC<br>CCCAGU<br>GUGUG<br>AAAGAC          | ATGAAG<br>AATTTTT<br>TTT    | 8 |
| hsa-miR-641     | 770  | 8:1:1 | -4.5  | -8.3   | 3.8  | AUAGGA<br>UAGAGU<br>CACCUC<br>CUUAUG         | AATGTTT<br>TCAACA<br>C      | 8 |
| hsa-miR-491-3p  | 438  | 8:1:1 | -6.3  | -10.12 | 3.82 | CAAGAU<br>UCCCUU<br>CUAC<br>UACUCC           | TTGTATA<br>TATAAAT<br>TTG   | 8 |
| hsa-miR-508-5p  | 288  | 8:1:1 | -6.14 | -9.96  | 3.82 | AGAGGG<br>CGUCAC<br>UCAUG<br>UAGAUA          | TTTTGAG<br>TAATATT<br>TTTAT | 8 |
| hsa-miR-577     | 34   | 8:1:1 | -4.1  | -7.92  | 3.82 | AAAUAU<br>UGGUAC<br>CUG<br>CAAAAC            | TATTATT<br>TTRACTTG         | 8 |
| hsa-miR-548a-3p | 1057 | 8:1:1 | -5.2  | -9.03  | 3.83 | UGGCAA<br>UUACUU<br>UUGC                     | CTTGTTT<br>TTCCATA<br>GT    | 8 |

|                 |      |       |       |        |      |                                               |                                            |   |
|-----------------|------|-------|-------|--------|------|-----------------------------------------------|--------------------------------------------|---|
| hsa-miR-802     | 550  | 8:1:1 | -6    | -9.84  | 3.84 | CAGUAA<br>CAAAGA<br>UUCAUC<br>CUUGU<br>AAAAGU | TTGTTTT<br>TGGATAT<br>TTGTA                | 8 |
| hsa-miR-548d-5p | 405  | 8:1:1 | -2.9  | -6.74  | 3.84 | AAUUGU<br>GGUUUU<br>UGCC<br>UAGCAA            | TTTATTTT<br>GTTTCTA                        | 8 |
| hsa-miR-548p    | 322  | 8:1:0 | -3.89 | -7.73  | 3.84 | AAACUG<br>CAGUUA<br>CUUU<br>ACUGGC            | TTTTTGA<br>TTTT<br>AAATGAT<br>TCCTTGT      | 8 |
| hsa-miR-664     | 1048 | 8:1:0 | -5.97 | -9.82  | 3.85 | AAAUGA<br>UUGGAU<br>AAGGAG<br>CUUACA          | TTTTT<br>TTTTT<br>AAATGAT<br>TCCTTGT       | 8 |
| hsa-miR-708     | 1019 | 8:1:1 | -8.3  | -12.15 | 3.85 | AUCUAG<br>CUGGG<br>AAAAGU<br>AAUUGU           | ACGCTTC<br>TAATTAC<br>TTTTTTTT<br>TTTAA    | 8 |
| hsa-miR-548b-5p | 328  | 8:1:1 | -0.2  | -4.06  | 3.86 | GGUUUU<br>GGCC<br>AAAAGU<br>AAUUGC            | TTTTTTTT<br>TTTAA<br>TTTTTTTT<br>TTTAA     | 8 |
| hsa-miR-548c-5p | 328  | 8:1:1 | -0.2  | -4.06  | 3.86 | GGUUUU<br>UGCC<br>AAAAGU<br>AAUUGU            | TTTTTTTT<br>TTTAA<br>TTTTTTTT<br>TTTA      | 8 |
| hsa-miR-548d-5p | 328  | 8:1:1 | -0.2  | -4.06  | 3.86 | GGUUUU<br>UGCC<br>AAAAGU<br>AAUUGC            | TTTTTTTT<br>TTTAA<br>TTTTTTTT<br>TTTAAAT   | 8 |
| hsa-miR-548j    | 328  | 8:1:1 | -0.2  | -4.06  | 3.86 | GGUCUU<br>UGGU<br>CAAAGG<br>UAUUUG            | TTTTTTTT<br>TTTAAAT<br>G<br>ATAATTT<br>TAA | 8 |
| hsa-miR-548m    | 353  | 8:1:1 | -1.5  | -5.37  | 3.87 | UGGUUU<br>UUG<br>GAUGAU<br>GAUGGC             | ATAATTT<br>TAA<br>ATTATAA<br>TATATTT       | 8 |
| hsa-miR-1272    | 1239 | 8:1:1 | -4.8  | -8.68  | 3.88 | AGCAAA<br>UUCUGA<br>AA<br>UGGUUG              | ATTATAA<br>TATATTT<br>TATTATA<br>AAATAG    | 8 |
| hsa-miR-380     | 851  | 8:1:1 | -3.8  | -7.68  | 3.88 | ACCAUA<br>GAACAU<br>GCGC<br>AAAAGU            | TATTATA<br>AAATAG<br>ATTATTT<br>TACTTGT    | 8 |
| hsa-miR-548a-5p | 35   | 8:0:1 | -4.56 | -8.44  | 3.88 | AAUUGC<br>GAGUUU<br>UACC<br>GUAGAU            | TACTTGT<br>TTATT<br>CGTTATG<br>ATTATAA     | 8 |
| hsa-miR-376a    | 1232 | 8:1:1 | -4.6  | -8.49  | 3.89 | UCUCCU<br>UCUAUG<br>AGUA<br>CGUGGA            | ATTATAA<br>TAT<br>CGTTATG<br>ATTATAA       | 8 |
| hsa-miR-376b    | 1232 | 8:1:1 | -4.6  | -8.49  | 3.89 | UUAUCC<br>UUCUAU<br>GUUU<br>UUCAAG            | ATTATAA<br>TAT<br>TTATTTG<br>TATAA         | 8 |
| hsa-miR-1297    | 583  | 8:1:1 | -8.9  | -12.79 | 3.89 | UUAUCC<br>AGGUG<br>AAAGAC<br>AUAGGA           | TTATTTG<br>TATAA<br>TATGTTT<br>TATTT       | 8 |
| hsa-miR-641     | 477  | 8:0:1 | -7.4  | -11.29 | 3.89 | UAGAGU<br>CACCUC                              | TATGTTT<br>TATTT                           | 8 |

|                 |      |       |       |        |      |                                               |                             |   |
|-----------------|------|-------|-------|--------|------|-----------------------------------------------|-----------------------------|---|
| hsa-miR-548p    | 300  | 8:1:1 | -3.6  | -7.5   | 3.9  | UAGCAA<br>AAACUG<br>CAGUUA<br>CUUU            | TTTTTATT<br>TTTTTTTC<br>AT  | 8 |
| hsa-miR-1279    | 871  | 8:1:1 | -5.5  | -9.41  | 3.91 | UCAUUA<br>UGCUUC<br>UUUCU                     | GTAATAT<br>ATCAT            | 8 |
| hsa-miR-1246    | 661  | 8:1:1 | -4.72 | -8.63  | 3.91 | AAUGGA<br>UUUUUG<br>GAGCAG<br>G               | ATATTCA<br>TAG              | 8 |
| hsa-miR-26b     | 457  | 8:1:1 | -7.6  | -11.51 | 3.91 | UUCAAG<br>UAAUUC<br>AGGAUA<br>GGU             | TTATTTG<br>TATA             | 8 |
| hsa-miR-620     | 87   | 8:1:1 | -6.6  | -10.51 | 3.91 | AUGGAG<br>AUAGAU<br>AUAGAA<br>AU              | TATATTC<br>ATTTGT           | 8 |
| hsa-miR-548n    | 325  | 8:1:1 | -2.4  | -6.33  | 3.93 | CAAAAG<br>UAAUUG<br>UGGAUU<br>UUGU            | TTGATTT<br>TTTTTTT          | 8 |
| hsa-miR-548i    | 35   | 8:0:1 | -4.5  | -8.44  | 3.94 | AAAAGU<br>AAUUGC<br>GGAUUU<br>UGCC            | ATTATTT<br>TAC              | 8 |
| hsa-miR-382     | 980  | 8:1:1 | -4.8  | -8.75  | 3.95 | GAAGUU<br>GUUCGU<br>GGUGGA<br>UUCG            | AATAAAT<br>TCTTTTT<br>AAGAA | 8 |
| hsa-miR-770-5p  | 893  | 8:1:1 | -8.8  | -12.78 | 3.98 | UCCAGU<br>ACCACG<br>UGUCAG<br>GGCCA           | TGTATTG<br>GAA              | 8 |
| hsa-miR-1259    | 1212 | 8:1:1 | -3.8  | -7.79  | 3.99 | UCCUG<br>AGACCC<br>UUUAAC<br>CUGUGA<br>GAGCUU | AATATAT<br>ATATAAT<br>AATA  | 8 |
| hsa-miR-208a    | 987  | 8:1:1 | -4.84 | -8.83  | 3.99 | UUGGCC<br>CGGGUU<br>AUAC                      | TCTTTTT<br>AAGAAA<br>T      | 8 |
| hsa-miR-374a    | 254  | 8:1:0 | -6.6  | -10.59 | 3.99 | UUUAUA<br>UACAAC<br>CUGAUA<br>AGUG            | GTATAAT<br>ATTTCTA<br>AA    | 8 |
| hsa-miR-1299    | 685  | 8:1:1 | -10.1 | -14.1  | 4    | UUCUGG<br>AAUUCU<br>GUGUGA<br>GGGA            | GTTCCAT<br>ATTAAAA<br>TA    | 8 |
| hsa-miR-190b    | 218  | 8:1:1 | -7.3  | -11.3  | 4    | UGAUUA<br>GUUUGA<br>UAUUGG<br>GUU             | AATATAT<br>ATATATA<br>TAT   | 8 |
| hsa-miR-26b     | 286  | 8:1:1 | -5.9  | -9.92  | 4.02 | UUCAAG<br>JAAUUC<br>AGGAUA<br>GGU             | TTTTTTG<br>AGT              | 8 |
| hsa-miR-105     | 510  | 8:1:1 | -10.9 | -14.93 | 4.03 | UCAAAU<br>GCUCAG<br>ACUCCU<br>GUGGU           | ATTATTT<br>GTATATA<br>TAT   | 8 |
| hsa-miR-548c-5p | 305  | 8:1:1 | -0.46 | -4.49  | 4.03 | AAAAGU<br>AAUUGC<br>GGUUUU<br>UGCC            | ATTTTTTT<br>TTC             | 8 |

|                 |      |       |       |        |      |                                              |                             |   |
|-----------------|------|-------|-------|--------|------|----------------------------------------------|-----------------------------|---|
| hsa-miR-491-3p  | 252  | 8:0:1 | -8.1  | -12.13 | 4.03 | CUUAUG<br>CAAGAU<br>UCCCUU<br>CUAC<br>UAUUGC | TTGTATA<br>ATATTTTC<br>TA   | 8 |
| hsa-miR-32      | 1279 | 8:1:1 | -6.7  | -10.74 | 4.04 | ACAUUA<br>CUAAGU<br>UGCA<br>CUACAA           | TATGTAA<br>TAGTA            | 8 |
| hsa-miR-524-5p  | 458  | 8:1:1 | -7.2  | -11.24 | 4.04 | AGGGAA<br>GCACUU<br>UCUC<br>CAUCUU           | TATTTGT<br>ATAATAT<br>AT    | 8 |
| hsa-miR-200b    | 294  | 8:1:1 | -4.3  | -8.34  | 4.04 | ACUGGG<br>CAGCAU<br>UGGA<br>AUGUAU           | GTAATAT<br>TTTTAT           | 8 |
| hsa-miR-568     | 212  | 8:1:1 | -5.9  | -9.94  | 4.04 | AAAUGU<br>AUACAC<br>AC<br>UUAUCA             | TTTGTA<br>ATAT              | 8 |
| hsa-miR-361-5p  | 141  | 8:0:1 | -7.5  | -11.54 | 4.04 | GAAUCU<br>CCAGGG<br>GUAC<br>UAAUUU           | TTTTGAT<br>ATATTTG<br>TATAA | 8 |
| hsa-miR-590-3p  | 231  | 8:1:0 | -8.21 | -12.26 | 4.05 | UAUGUA<br>UAAGCU<br>AGU<br>AGGUUG            | ATATAAT<br>TTGTTTT<br>TTTG  | 8 |
| hsa-miR-656     | 1220 | 8:1:0 | -3.8  | -7.86  | 4.06 | CCUGUG<br>AGGUGU<br>UCA<br>ACUCAA            | TATAATA<br>ATACA            | 8 |
| hsa-miR-373     | 1004 | 8:1:1 | -6.83 | -10.89 | 4.06 | AAUGGG<br>GGCGCU<br>UCC<br>AAAAGU            | AAGAATT<br>TTT              | 8 |
| hsa-miR-548a-5p | 658  | 8:1:1 | -2.5  | -6.56  | 4.06 | AAUUGC<br>GAGUUU<br>UACC<br>UAGCAA           | ATTATAT<br>TCATAGT<br>AGTAT | 8 |
| hsa-miR-548p    | 370  | 8:1:1 | -1.3  | -5.36  | 4.06 | AAACUG<br>CAGUUA<br>CUUU<br>UAGUAU           | TTTTTATT<br>TTGTTTG<br>TAT  | 8 |
| hsa-miR-577     | 330  | 8:1:1 | -0.2  | -4.26  | 4.06 | AAAUAU<br>UGGUAC<br>CUG<br>AGUGGU            | TTTTTTTT<br>TAAATGT<br>CATT | 8 |
| hsa-miR-203     | 803  | 8:1:1 | -3.6  | -7.67  | 4.07 | UCUUA<br>CAGUUC<br>AACAGU<br>U<br>UGGAUU     | ACATTAT<br>AATATAA<br>TAATA | 8 |
| hsa-miR-1290    | 395  | 8:1:1 | -3.4  | -7.47  | 4.07 | UUUGGA<br>UCAGGG<br>A<br>AUAUAA              | ATAAATT<br>CGTTTTA<br>T     | 8 |
| hsa-miR-374b    | 384  | 8:1:0 | -5.4  | -9.47  | 4.07 | UACAAC<br>CUGCUA<br>AGUG<br>ACUGGC           | GTATAAT<br>ATA              | 8 |
| hsa-miR-664     | 824  | 8:1:1 | -1.3  | -5.38  | 4.08 | UAGGGA<br>AAAUGA<br>UUGGAU<br>AUGUAU         | GAATTAA<br>TCT              | 8 |
| hsa-miR-568     | 730  | 8:1:1 | -3.9  | -7.98  | 4.08 | AAAUGU<br>AUACAC<br>AC                       | ATTATAT<br>ATA              | 8 |

|                 |      |       |       |        |      |                                                          |   |
|-----------------|------|-------|-------|--------|------|----------------------------------------------------------|---|
| hsa-miR-487a    | 153  | 8:1:0 | -6.2  | -10.28 | 4.08 | GUGGUU<br>AUCCCU TGTATAA<br>GCUGUG TAATAT<br>UUCG        | 8 |
| hsa-miR-410     | 729  | 8:1:0 | -3.85 | -7.94  | 4.09 | AGGUUG TATTATA<br>UCUGUG TATATAT<br>AUGAGU AT<br>UCG     | 8 |
| hsa-miR-1284    | 564  | 8:1:1 | -8.1  | -12.19 | 4.09 | UCUAUA<br>CAGACC TTGTATA<br>CUGGCU TATAAA<br>UUUC        | 8 |
| hsa-miR-561     | 655  | 8:1:1 | -2.1  | -6.2   | 4.1  | AUCAAG TAAATTA<br>GAUCUU TATTCAT<br>AAACUU A<br>UGCC     | 8 |
| hsa-miR-487a    | 383  | 8:1:0 | -5.2  | -9.3   | 4.1  | GUGGUU<br>AUCCCU TGTATAA<br>GCUGUG TAT<br>UUCG           | 8 |
| hsa-miR-548n    | 331  | 8:1:1 | -0.2  | -4.3   | 4.1  | CAAAAG<br>UAAUUG TTTTTTTT<br>UGGAUU AAA<br>UUGU          | 8 |
| hsa-miR-559     | 329  | 8:1:1 | 0.1   | -4     | 4.1  | UAAAGU TTTTTTTT<br>AAAUAU TTAATG<br>GCACCA TCAT<br>AAA   | 8 |
| hsa-miR-1259    | 1068 | 8:1:1 | -4.9  | -9.01  | 4.11 | UCCCUG<br>AGACCC ATAGTAT<br>UUUAAC ATATAAT<br>CUGUGA     | 8 |
| hsa-miR-487a    | 588  | 8:1:0 | -7.76 | -11.87 | 4.11 | GUGGUU TGTATAA<br>AUCCCU TATGTAT<br>GCUGUG GT<br>UUCG    | 8 |
| hsa-miR-590-3p  | 446  | 8:1:0 | -7    | -11.11 | 4.11 | UAAUUU ATAAATT<br>UAUGUA TGTTTTA<br>UAAGCU TTT<br>AGU    | 8 |
| hsa-miR-548l    | 1244 | 8:1:1 | -4    | -8.13  | 4.13 | AAAAGU AATATAT<br>AUUUGC TTGAATA<br>GGGUUU ACATA<br>UGUC | 8 |
| hsa-miR-652     | 684  | 8:1:1 | -10   | -14.14 | 4.14 | UAGGAG GGTTCCA<br>AGGGUG TATTA<br>CCAUUC AT              | 8 |
| hsa-miR-1297    | 511  | 8:1:1 | -10.7 | -14.84 | 4.14 | UUCAAG TTATTTG<br>UAAUUC TATATAT<br>AGGUG A              | 8 |
| hsa-miR-450b-5p | 212  | 8:1:1 | -5.8  | -9.94  | 4.14 | UUUUGC<br>AAUAUG TTTGTAA<br>UUCUG ATATAT<br>AAUA         | 8 |
| hsa-miR-548h    | 302  | 8:1:1 | -2.1  | -6.25  | 4.15 | AAAAGU<br>AAUCGC TTTATTTT<br>GGUUUU TTTT<br>UGUC         | 8 |
| hsa-miR-196a    | 1027 | 8:1:1 | -7.6  | -11.76 | 4.16 | UAGGUA AATTACG<br>GUUUCA TATAAAA<br>UGUUGU TAA<br>UGGG   | 8 |
| hsa-miR-196b    | 1027 | 8:1:1 | -7.6  | -11.76 | 4.16 | UAGGUA AATTACG<br>GUUUC TATAAAA<br>UGUUGU TAA<br>UGGG    | 8 |

|                 |      |       |        |        |      |                                              |                             |   |
|-----------------|------|-------|--------|--------|------|----------------------------------------------|-----------------------------|---|
| hsa-miR-381     | 459  | 8:1:1 | -7.3   | -11.46 | 4.16 | AGCGAG<br>GUUGCC<br>CUUUGU<br>AUAU<br>UAUACA | ATTTGTA<br>TAAT             | 8 |
| hsa-miR-300     | 436  | 8:1:1 | -5.8   | -9.96  | 4.16 | AGGGCA<br>GACUCU<br>CUCU                     | ATTTGTA<br>TATATA           | 8 |
| hsa-miR-548m    | 1245 | 8:1:1 | -3.8   | -7.99  | 4.19 | CAAAGG<br>UAUUUG<br>UGGUUU<br>UUG            | ATATATT<br>TGAATAA<br>CAT   | 8 |
| hsa-miR-520d-3p | 1004 | 8:1:1 | -6.7   | -10.89 | 4.19 | AAAGUG<br>CUUCUC<br>UUUGGU<br>GGGU           | AAGAATT<br>TTTT             | 8 |
| hsa-miR-1284    | 152  | 8:1:1 | -6.5   | -10.7  | 4.2  | UCUAUA<br>CAGACC<br>CUGGCU<br>UUUC           | TTGTATA<br>ATAA             | 8 |
| hsa-miR-802     | 1143 | 8:1:0 | -9.5   | -13.71 | 4.21 | CAGUAA<br>CAAAGA<br>UUCAUC<br>CUUGU          | TTGTTAC<br>AAC              | 8 |
| hsa-miR-26a     | 1088 | 8:1:1 | -7.6   | -11.81 | 4.21 | UUCAAG<br>UAAUCC<br>AGGAUA<br>GGCU           | TTATTTG<br>TTTATTG<br>TATAA | 8 |
| hsa-miR-568     | 224  | 8:1:1 | -8.3   | -12.51 | 4.21 | AUGUAU<br>AAAUGU<br>AUACAC<br>AC             | TATATAT<br>ATATAAT          | 8 |
| hsa-miR-643     | 784  | 8:1:1 | -4.2   | -8.42  | 4.22 | ACUUGU<br>AUGCUA<br>GCUCAG<br>GUAG           | CATATAC<br>GGATAT<br>AT     | 8 |
| hsa-miR-653     | 1146 | 8:1:0 | -10.06 | -14.29 | 4.23 | GUGUUG<br>AAACAA<br>UCUCUA<br>CUG            | TTACAAC<br>ATG              | 8 |
| hsa-miR-568     | 751  | 8:1:1 | -4.2   | -8.43  | 4.23 | AUGUAU<br>AAAUGU<br>AUACAC<br>AC             | TTAATAT<br>AGTAAC<br>AACGA  | 8 |
| hsa-miR-448     | 880  | 8:1:1 | -6.2   | -10.44 | 4.24 | UUGCAU<br>AUGUAG<br>GAUGUC<br>CCAU           | CATATAT<br>AATAAT           | 8 |
| hsa-miR-577     | 307  | 8:1:1 | -0.1   | -4.34  | 4.24 | UAGAUA<br>AAAUAU<br>UGGUAC<br>CUG            | TTTTTTTT<br>CATTTTA<br>TTT  | 8 |
| hsa-miR-194     | 1142 | 8:1:1 | -9.02  | -13.27 | 4.25 | UGUAAC<br>AGCAAC<br>UCCAUG<br>UGGA           | TTTGTTA<br>CAACAT<br>GTAA   | 8 |
| hsa-miR-568     | 222  | 8:1:1 | -8.3   | -12.55 | 4.25 | AUGUAU<br>AAAUGU<br>AUACAC<br>AC             | TATATAT<br>ATATATA<br>AT    | 8 |
| hsa-miR-548m    | 985  | 8:1:1 | -5     | -9.26  | 4.26 | CAAAGG<br>UAUUUG<br>UGGUUU<br>UUG            | ATTCTTT<br>TTAAGAA          | 8 |
| hsa-miR-548h    | 658  | 8:1:1 | -2.3   | -6.56  | 4.26 | AAAAGU<br>AAUCGC<br>GGUUUU<br>UGUC           | ATTATAT<br>TCA              | 8 |

|                |      |       |       |        |      |                                              |                            |   |
|----------------|------|-------|-------|--------|------|----------------------------------------------|----------------------------|---|
| hsa-miR-380    | 387  | 8:1:1 | -3.3  | -7.56  | 4.26 | UGGUUG<br>ACCAUA<br>GAACAU<br>GCGC<br>GAAGUU | TAATATA<br>TATAAAT<br>TCGT | 8 |
| hsa-miR-495    | 1093 | 8:1:0 | -6.7  | -10.97 | 4.27 | GCCCAU<br>GUUAUU<br>UUCG<br>CUAAUA           | TGTTTAT<br>TGT             | 8 |
| hsa-miR-633    | 851  | 8:1:1 | -3.4  | -7.68  | 4.28 | GUAUCU<br>ACCACA<br>AUAUU<br>UGGUUG          | TATTATA<br>AAA             | 8 |
| hsa-miR-380    | 807  | 8:1:1 | -4.14 | -8.42  | 4.28 | ACCAUA<br>GAACAU<br>GCGC<br>UCCUG            | TATAATA<br>TAATAA          | 8 |
| hsa-miR-1259   | 386  | 8:1:0 | -3.7  | -7.98  | 4.28 | AGACCC<br>UUUAAC<br>CUGUGA<br>UAAAGU         | ATAATAT<br>ATATAAA<br>TT   | 8 |
| hsa-miR-559    | 318  | 8:0:1 | -3.4  | -7.68  | 4.28 | AAAUAU<br>GCACCA<br>AAA<br>AAAGUG            | TTTATTTT<br>TG             | 8 |
| hsa-miR-520e   | 1004 | 8:1:1 | -6.6  | -10.89 | 4.29 | CUUCCU<br>UUUUGA<br>GGG<br>CAAAGG            | AAGAATT<br>TTTT            | 8 |
| hsa-miR-548m   | 366  | 8:1:1 | -0.3  | -4.59  | 4.29 | UAUUUG<br>UGGUUU<br>UUG<br>UAUACA            | ATAATTT<br>TTATTTT<br>GT   | 8 |
| hsa-miR-300    | 150  | 8:1:1 | -6.5  | -10.79 | 4.29 | AGGGCA<br>GACUCU<br>CUCU<br>CAAAAG           | ATTTGTA<br>TAAT            | 8 |
| hsa-miR-548n   | 36   | 8:1:1 | -4.8  | -9.09  | 4.29 | UAAUUG<br>UGGAUU<br>UUGU<br>UGUAAA           | TTATTTT<br>ACT             | 8 |
| hsa-miR-30c    | 1092 | 8:1:1 | -6.4  | -10.7  | 4.3  | CAUCCU<br>ACACUC<br>UCAGC<br>UGUAAA          | TTGTTTA<br>TTGT            | 8 |
| hsa-miR-30b    | 1092 | 8:1:1 | -6.4  | -10.7  | 4.3  | CAUCCU<br>ACACUC<br>AGCU<br>AGAAGG           | TTGTTTA<br>TTGT            | 8 |
| hsa-miR-1252   | 920  | 8:1:1 | -6.9  | -11.2  | 4.3  | AAAUUG<br>AAUUCA<br>UUUA<br>CUCCUA           | TATCCTT<br>TTTTTTTT<br>TT  | 8 |
| hsa-miR-337-3p | 754  | 8:1:0 | -4.2  | -8.5   | 4.3  | UAUGAU<br>GCCUUU<br>CUUC<br>GUGGUU           | ATATAGT<br>AACAAC<br>G     | 8 |
| hsa-miR-487b   | 383  | 8:1:1 | -5    | -9.3   | 4.3  | AUCCCU<br>GUCCUG<br>UUCG<br>AAAAGU           | TGTATAA<br>TAT             | 8 |
| hsa-miR-548l   | 30   | 8:1:1 | -4.7  | -9     | 4.3  | AUUUGC<br>GGUUUU<br>UGUC<br>UCAUUU           | AATATAT<br>TATT            | 8 |
| hsa-miR-153    | 593  | 8:1:1 | -7.9  | -12.21 | 4.31 | UUGUGA<br>UGUUGC<br>AGCU                     | AATATGT<br>ATGTGAT<br>TAA  | 8 |

|              |      |       |       |        |      |                                              |                            |   |
|--------------|------|-------|-------|--------|------|----------------------------------------------|----------------------------|---|
| hsa-miR-380  | 676  | 8:0:1 | -7.7  | -12.02 | 4.32 | UGGUUG<br>ACCAUA<br>GAACAU<br>GCGC<br>CUAAUA | TATTATA<br>TGGTTCC         | 8 |
| hsa-miR-633  | 298  | 8:1:1 | -3.6  | -7.92  | 4.32 | GUAUCU<br>ACCACA<br>AUA AAA                  | TATTTTT<br>ATTTTTT         | 8 |
| hsa-miR-494  | 304  | 8:1:1 | 0.3   | -4.03  | 4.33 | AGGUUG<br>UCCGUG<br>UUGUCU<br>UCUCU          | TATTTTT<br>TTCATT<br>TT    | 8 |
| hsa-miR-384  | 991  | 8:1:1 | -4.3  | -8.65  | 4.35 | AUUCCU<br>AGAAAU<br>UGUUCA<br>UA             | TTTAAGA<br>AATATGA<br>AGAA | 8 |
| hsa-miR-944  | 906  | 8:1:0 | -7.7  | -12.06 | 4.36 | AAAUUA<br>UUGUAC<br>AUCGGA<br>UGAG           | CAATATT<br>TATATGA<br>TA   | 8 |
| hsa-miR-30a  | 299  | 8:1:1 | -3.44 | -7.8   | 4.36 | UGUAAA<br>CAUCCU<br>CGACUG<br>GAAG           | ATTTTTA<br>TTTTT           | 8 |
| hsa-miR-30d  | 299  | 8:1:1 | -3.44 | -7.8   | 4.36 | UGUAAA<br>CAUCCC<br>CGACUG<br>GAAG           | ATTTTTA<br>TTTT            | 8 |
| hsa-miR-30e  | 299  | 8:1:1 | -3.44 | -7.8   | 4.36 | UGUAAA<br>CAUCCU<br>UGACUG<br>GAAG           | ATTTTTA<br>TTTT            | 8 |
| hsa-miR-568  | 441  | 8:1:1 | -6.1  | -10.47 | 4.37 | AUGUAU<br>AAAUGU<br>AUACAC<br>AC             | TATATAT<br>AAATTT          | 8 |
| hsa-miR-186  | 398  | 8:1:0 | -3    | -7.39  | 4.39 | CAAAGA<br>AUUCUC<br>CUUUUG<br>GGCU           | AATTCGT<br>TTT             | 8 |
| hsa-miR-561  | 367  | 8:1:1 | -0.3  | -4.69  | 4.39 | AUCAAG<br>GAUCUU<br>AAACUU<br>UGCC           | TAATTTT<br>TATTT           | 8 |
| hsa-miR-653  | 838  | 8:1:1 | -3.4  | -7.8   | 4.4  | GUGUUG<br>AAACAA<br>UCUCUA<br>CUG            | TTACAAT<br>AAGTAT          | 8 |
| hsa-miR-568  | 1214 | 8:1:1 | -3    | -7.41  | 4.41 | AUGUAU<br>AAAUGU<br>AUACAC<br>AC             | TATATAT<br>ATAATAA<br>TA   | 8 |
| hsa-miR-548p | 1140 | 8:1:1 | -8.9  | -13.31 | 4.41 | UAGCAA<br>AAACUG<br>CAGUUA<br>CUUU           | ATTTTGT<br>TACAAC<br>AT    | 8 |
| hsa-miR-448  | 87   | 8:1:1 | -6.1  | -10.51 | 4.41 | UUGCAU<br>AUGUAG<br>GAUGUC<br>CCAU           | TATATTC<br>ATT             | 8 |
| hsa-miR-221  | 1272 | 8:1:1 | -5.7  | -10.12 | 4.42 | ACCUGG<br>CAUACA<br>AUGUAG<br>AUUU           | AATGTAT<br>TATGTA          | 8 |
| hsa-miR-181a | 556  | 8:1:1 | -6.6  | -11.03 | 4.43 | AACAUU<br>CAACGC<br>UGUCGG<br>UGAGU          | TTGGATA<br>TTTGTAT<br>ATAT | 8 |

|                 |      |       |       |        |      |                                     |                            |   |
|-----------------|------|-------|-------|--------|------|-------------------------------------|----------------------------|---|
| hsa-miR-656     | 1281 | 8:1:1 | -5.1  | -9.54  | 4.44 | AGGUUG<br>CCUGUG<br>AGGUGU<br>UCA   | TGTAATA<br>GTA             | 8 |
| hsa-miR-200c    | 1127 | 8:1:1 | -8.4  | -12.84 | 4.44 | CGUCUU<br>ACCCAG<br>CAGUGU<br>UUGG  | GTAGTA<br>ATTAATT<br>ATT   | 8 |
| hsa-miR-142-5p  | 729  | 8:1:1 | -3.5  | -7.94  | 4.44 | CAUAAA<br>GUAGAA<br>AGCACU<br>ACU   | TATTATA<br>TATATAT         | 8 |
| hsa-miR-548l    | 258  | 8:1:1 | -5.3  | -9.75  | 4.45 | AAAAGU<br>AUUUGC<br>GGUUUU<br>UGUC  | AATATTT<br>CTAAATA<br>T    | 8 |
| hsa-miR-21      | 697  | 8:1:0 | -8.9  | -13.36 | 4.46 | UAGCUU<br>AUCAGA<br>CUGAUG<br>UUGA  | AATAAG<br>CTAATAT<br>AA    | 8 |
| hsa-miR-524-5p  | 93   | 8:1:0 | -5.9  | -10.36 | 4.46 | CUACAA<br>AGGGAA<br>GCACUU<br>UCUC  | CATTTGT<br>ATAATAT<br>A    | 8 |
| hsa-miR-30c     | 771  | 8:1:0 | -3.6  | -8.07  | 4.47 | UGUAAA<br>CAUCCU<br>ACACUC<br>UCAGC | ATGTTTT<br>CAACAC<br>C     | 8 |
| hsa-miR-30b     | 771  | 8:1:0 | -3.6  | -8.07  | 4.47 | UGUAAA<br>CAUCCU<br>ACACUC<br>AGCU  | ATGTTTT<br>CAACAC<br>CATAT | 8 |
| hsa-miR-559     | 582  | 8:1:1 | -7.7  | -12.17 | 4.47 | UAAAAGU<br>AAAUAU<br>GCACCA<br>AAA  | TTTATTT<br>GTATAA          | 8 |
| hsa-miR-568     | 469  | 8:1:1 | -7.6  | -12.07 | 4.47 | AUGUAU<br>AAAUGU<br>AUACAC<br>AC    | TATATAT<br>ATAT            | 8 |
| hsa-miR-487a    | 1100 | 8:1:0 | -6.81 | -11.3  | 4.49 | GUGGUU<br>AUCCCU<br>GCUGUG<br>UUCG  | TGTATAA<br>TAATATA         | 8 |
| hsa-miR-142-3p  | 1018 | 8:1:1 | -7.09 | -11.58 | 4.49 | UGUAGU<br>GUUUCU<br>UACUUU<br>AUGGA | AACGCTT<br>CTAATTA<br>CGT  | 8 |
| hsa-miR-548a-5p | 849  | 8:1:1 | -3.3  | -7.79  | 4.49 | AAAAGU<br>AAUUGC<br>GAGUUU<br>UACC  | ATTATTA<br>TAAA            | 8 |
| hsa-miR-548c-5p | 849  | 8:1:1 | -3.3  | -7.79  | 4.49 | AAAAGU<br>AAUUGC<br>GGUUUU<br>UGCC  | ATTATTA<br>TAAAA           | 8 |
| hsa-miR-548i    | 849  | 8:1:1 | -3.3  | -7.79  | 4.49 | AAAAGU<br>AAUUGC<br>GGUUUU<br>UGCC  | ATTATTA<br>TAAAATA<br>GTAA | 8 |
| hsa-miR-548a-5p | 366  | 8:1:1 | -0.1  | -4.59  | 4.49 | AAAAGU<br>AAUUGC<br>GAGUUU<br>UACC  | ATAATTT<br>TTATTTT         | 8 |
| hsa-miR-548c-5p | 366  | 8:1:1 | -0.1  | -4.59  | 4.49 | AAAAGU<br>AAUUGC<br>GGUUUU<br>UGCC  | ATAATTT<br>TTATTTT<br>G    | 8 |

|                 |      |       |      |        |      |                                      |                             |   |
|-----------------|------|-------|------|--------|------|--------------------------------------|-----------------------------|---|
| hsa-miR-548d-5p | 366  | 8:1:1 | -0.1 | -4.59  | 4.49 | AAAAGU<br>AAUUGU<br>GGUUUU<br>UGCC   | ATAATTT<br>TTATTTT<br>GTTTG | 8 |
| hsa-miR-548j    | 366  | 8:1:1 | -0.1 | -4.59  | 4.49 | AAAAGU<br>AAUUGC<br>GGUCUU<br>UGGU   | ATAATTT<br>TTATTT           | 8 |
| hsa-miR-548h    | 366  | 8:1:1 | -0.1 | -4.59  | 4.49 | AAAAGU<br>AAUCGC<br>GGUUUU<br>UGUC   | ATAATTT<br>TTAT             | 8 |
| hsa-miR-548i    | 366  | 8:1:1 | -0.1 | -4.59  | 4.49 | AAAAGU<br>AAUUGC<br>GGUUUU<br>UGCC   | ATAATTT<br>TTA              | 8 |
| hsa-miR-26a     | 912  | 8:1:1 | -7   | -11.51 | 4.51 | UUCAAG<br>UAAUCC<br>AGGAUA<br>GGCU   | TTATATG<br>ATAT             | 8 |
| hsa-miR-142-3p  | 779  | 8:1:1 | -5.1 | -9.62  | 4.52 | UGUAGU<br>GUUUCC<br>UACUUU<br>AUGGA  | AACACC<br>ATATACG<br>GATAT  | 8 |
| hsa-miR-425     | 1084 | 8:1:1 | -7.8 | -12.33 | 4.53 | AAUGAC<br>ACGAUC<br>ACUCCC<br>GUUGA  | CGCGTTA<br>TTTGTTT<br>AT    | 8 |
| hsa-miR-487a    | 97   | 8:1:0 | -5.1 | -9.65  | 4.55 | GUGGUU<br>AUCCCU<br>GCUGUG<br>UUCG   | TGTATAA<br>TATAAAT<br>A     | 8 |
| hsa-miR-487b    | 97   | 8:1:1 | -5.1 | -9.65  | 4.55 | GUGGUU<br>AUCCCU<br>GUCCUG<br>UUCG   | TGTATAA<br>TATAAAT<br>A     | 8 |
| hsa-miR-33a     | 1270 | 8:1:1 | -6.7 | -11.26 | 4.56 | GUGCAU<br>UGUAGU<br>UGCAUU<br>GCA    | AGAATG<br>TATTATG<br>TAAT   | 8 |
| hsa-miR-520d-5p | 93   | 8:1:0 | -5.8 | -10.36 | 4.56 | CUACAA<br>AGGGAA<br>GCCCUU<br>UC     | CATTTGT<br>ATA              | 8 |
| hsa-miR-518a-5p | 93   | 8:1:1 | -5.8 | -10.36 | 4.56 | CUGCAA<br>AGGGAA<br>GCCCUU<br>UC     | CATTTGT<br>ATAATA           | 8 |
| hsa-miR-527     | 93   | 8:1:1 | -5.8 | -10.36 | 4.56 | CUGCAA<br>AGGGAA<br>GCCCUU<br>UC     | CATTTGT<br>ATAATA           | 8 |
| hsa-miR-448     | 660  | 8:1:1 | -3.2 | -7.77  | 4.57 | UUGCAU<br>AUGUAG<br>GAUGUC<br>CCAU   | TATATTC<br>ATA              | 8 |
| hsa-miR-182     | 261  | 8:1:1 | -4   | -8.58  | 4.58 | UUUGGC<br>AAUGGU<br>AGAACU<br>CACACU | ATTTCTA<br>AATATAT<br>TC    | 8 |
| hsa-miR-221     | 753  | 8:1:1 | -3.9 | -8.5   | 4.6  | ACCUGG<br>CAUACA<br>AUGUAG<br>AUUU   | AATATAG<br>TAACAA<br>CGAAAA | 8 |
| hsa-miR-1297    | 41   | 8:1:0 | -6.4 | -11    | 4.6  | UUCAAG<br>UAAUUC<br>AGGUG            | TACTTG<br>TTATTTT<br>T      | 8 |

|                |      |       |       |        |      |                                                |                            |   |
|----------------|------|-------|-------|--------|------|------------------------------------------------|----------------------------|---|
| hsa-miR-137    | 976  | 8:1:1 | -5.1  | -9.71  | 4.61 | UUUUUG<br>CUUAAAG<br>AAUACG<br>CGUAG<br>UUAAUG | AGGAAA<br>TAAATTC<br>T     | 8 |
| hsa-miR-155    | 668  | 8:1:1 | -5.2  | -9.83  | 4.63 | CUAAUC<br>GUGAUA<br>GGGGU<br>CUACAA            | TAGTAGT<br>ATAT            | 8 |
| hsa-miR-524-5p | 561  | 8:1:1 | -6.5  | -11.14 | 4.64 | AGGGAA<br>GCACUU<br>UCUC                       | TATTTGT<br>ATATATA<br>AA   | 8 |
| hsa-miR-548o   | 320  | 8:1:1 | -3.05 | -7.7   | 4.65 | AAAAGU<br>AAUUGC<br>GGUUUU<br>UGCC             | TATTTTT<br>GATTTTT<br>TT   | 8 |
| hsa-miR-656    | 755  | 8:1:1 | -3.8  | -8.46  | 4.66 | AGGUUG<br>CCUGUG<br>AGGUGU<br>UCA              | TATAGTA<br>ACAACG<br>AAA   | 8 |
| hsa-miR-1270   | 660  | 8:1:1 | -3.11 | -7.77  | 4.66 | CUGGAG<br>AUAUGG<br>AAGAGC<br>UGUGU<br>UGAUAU  | TATATTC<br>ATAGTA<br>GTA   | 8 |
| hsa-miR-190b   | 108  | 8:1:1 | -7.7  | -12.36 | 4.66 | GUUUGA<br>UAUUGG<br>GUU                        | AATATAT<br>ATATTCA         | 8 |
| hsa-miR-620    | 660  | 8:1:1 | -3.1  | -7.77  | 4.67 | AUGGAG<br>AUAGAU<br>AUAGAA<br>AU               | TATATTC<br>ATAGTA<br>GTATA | 8 |
| hsa-miR-374a   | 463  | 8:1:0 | -8.2  | -12.87 | 4.67 | UUUAAA<br>UACAAC<br>CUGAUA<br>AGUG             | GTATAAT<br>ATAT            | 8 |
| hsa-miR-494    | 451  | 8:1:1 | -6.45 | -11.12 | 4.67 | AGGUUG<br>UCCGUG<br>UUGUCU<br>UCUCU            | TTTGTTT<br>TATT            | 8 |
| hsa-miR-548p   | 243  | 8:0:1 | -7.2  | -11.87 | 4.67 | UAGCAA<br>AAACUG<br>CAGUUA<br>CUUU             | TTTTTGT<br>TTTTGTA<br>T    | 8 |
| hsa-miR-421    | 1091 | 8:1:1 | -6.2  | -10.88 | 4.68 | AUCAAC<br>AGACAU<br>UAAUUG<br>GGCGC            | TTTGTTT<br>ATT             | 8 |
| hsa-miR-548n   | 929  | 8:1:1 | -4.44 | -9.13  | 4.69 | CAAAAAG<br>UAAUUG<br>UGGAUU<br>UUGU            | TTTTTTTT<br>TTTTTT         | 8 |
| hsa-miR-139-5p | 666  | 8:1:1 | -5.1  | -9.79  | 4.69 | UCUACA<br>GUGCAC<br>GUGUCU<br>CCAGU            | CATAGTA<br>GTATAT          | 8 |
| hsa-miR-381    | 150  | 8:1:1 | -6.1  | -10.79 | 4.69 | AGCGAG<br>GUUGCC<br>CUUUGU<br>AUAU             | ATTTGTA<br>TAATAAT<br>ATT  | 8 |
| hsa-miR-802    | 300  | 8:1:1 | -2.8  | -7.5   | 4.7  | CAGUAA<br>CAAAGA<br>UUCAUC<br>CUUGU            | TTTTTATT<br>TTTTT          | 8 |
| hsa-miR-300    | 562  | 8:1:1 | -6.71 | -11.42 | 4.71 | UAUACA<br>AGGGCA<br>GACUCU<br>CUCU             | ATTTGTA<br>TATATAA<br>ATT  | 8 |

|                 |      |       |       |        |      |                                              |                             |   |
|-----------------|------|-------|-------|--------|------|----------------------------------------------|-----------------------------|---|
| hsa-miR-491-3p  | 1099 | 8:0:1 | -6.5  | -11.22 | 4.72 | CUUAUG<br>CAAGAU<br>UCCCUU<br>CUAC<br>CUAAUA | TTGTATA<br>ATA              | 8 |
| hsa-miR-633     | 34   | 8:1:1 | -3.2  | -7.92  | 4.72 | GUAUCU<br>ACCACA<br>AUAAA<br>CUACAA          | TATTATT<br>TACTT            | 8 |
| hsa-miR-520d-5p | 435  | 8:1:1 | -5.1  | -9.83  | 4.73 | AGGGAA<br>GCCCUU<br>UC<br>UCUACA             | TATTTGT<br>ATATAT           | 8 |
| hsa-miR-1283    | 250  | 8:1:1 | -7.4  | -12.13 | 4.73 | AAGGAA<br>AGCGCU<br>UUCU                     | TTTTGTA<br>TAATATT<br>T     | 8 |
| hsa-miR-548l    | 984  | 8:1:0 | -3.8  | -8.54  | 4.74 | AAAAGU<br>AUUUGC<br>GGGUUU<br>UGUC           | AATTCTT<br>TTTAAGA<br>A     | 8 |
| hsa-miR-595     | 501  | 8:1:1 | -7.1  | -11.84 | 4.74 | GAAGUG<br>UGCCGU<br>GGUGUG<br>UCU            | ACACATT<br>TGATTAT<br>TTGT  | 8 |
| hsa-miR-30e     | 369  | 8:1:1 | -0.61 | -5.35  | 4.74 | UGUAAA<br>CAUCCU<br>UGACUG<br>GAAG           | ATTTTTA<br>TTTTGTT<br>TGTA  | 8 |
| hsa-miR-655     | 892  | 8:1:1 | -7.4  | -12.15 | 4.75 | AGAGGU<br>UAUCCG<br>UGUUAU<br>GUUC           | TTGTATT<br>GGAATA<br>A      | 8 |
| hsa-miR-369-3p  | 97   | 8:1:0 | -4.9  | -9.65  | 4.75 | AAUAAU<br>ACAUGG<br>UUGAUC<br>UUU            | TGTATAA<br>TATAAAT          | 8 |
| hsa-miR-30a     | 1236 | 8:1:1 | -3.71 | -8.48  | 4.77 | UGUAAA<br>CAUCCU<br>CGACUG<br>GAAG           | ATGATTA<br>TAATATA<br>TT    | 8 |
| hsa-miR-496     | 1225 | 8:1:0 | -4.9  | -9.67  | 4.77 | UGAGUA<br>UUACAU<br>GGCCAA<br>UCUC           | TAATACA<br>CGTTATG<br>ATTA  | 8 |
| hsa-miR-374b    | 1096 | 8:1:1 | -5.74 | -10.51 | 4.77 | AUAUAA<br>UACAAC<br>CUGCUA<br>AGUG           | TTATTGT<br>ATAATAA<br>TATAT | 8 |
| hsa-miR-374b    | 1101 | 8:1:0 | -6.5  | -11.29 | 4.79 | AUAUAA<br>UACAAC<br>CUGCUA<br>AGUG           | GTATAAT<br>AATATAT<br>TTAT  | 8 |
| hsa-miR-491-3p  | 587  | 8:0:1 | -7.1  | -11.9  | 4.8  | CUUAUG<br>CAAGAU<br>UCCCUU<br>CUAC           | TTGTATA<br>ATATGTA<br>TGT   | 8 |
| hsa-miR-802     | 539  | 8:1:1 | -5.8  | -10.6  | 4.8  | CAGUAA<br>CAAAGA<br>UUCAUC<br>CUUGU          | TTTTTATT<br>AATTTGT<br>T    | 8 |
| hsa-miR-559     | 331  | 8:1:1 | 0.5   | -4.3   | 4.8  | UAAAGU<br>AAAUAU<br>GCACCA<br>AAA            | TTTTTTTT<br>AAATGTC<br>A    | 8 |
| hsa-miR-491-3p  | 290  | 8:1:1 | -3.8  | -8.6   | 4.8  | CUUAUG<br>CAAGAU<br>UCCCUU<br>CUAC           | TTGAGTA<br>ATATTTT<br>T     | 8 |

|                 |      |       |       |        |      |                                                           |   |
|-----------------|------|-------|-------|--------|------|-----------------------------------------------------------|---|
| hsa-miR-568     | 226  | 8:1:1 | -8.3  | -13.1  | 4.8  | AUGUAU<br>AAAUGU TATATAT<br>AUACAC ATAATT<br>AC<br>CAAAAG | 8 |
| hsa-miR-548n    | 1088 | 8:1:1 | -7    | -11.81 | 4.81 | JAAUUG TTATTTG<br>UGGAUU TTTAT<br>UUGU<br>AGCGAG          | 8 |
| hsa-miR-381     | 562  | 8:1:1 | -6.61 | -11.42 | 4.81 | GUUGCC ATTTGTA<br>CUUUGU TATATAA<br>AUAU ATT<br>CAAAAG    | 8 |
| hsa-miR-548n    | 330  | 8:1:1 | 0.55  | -4.26  | 4.81 | JAAUUG TTTTTTTT<br>UGGAUU TAA<br>UUGU<br>AAUGGA           | 8 |
| hsa-miR-1246    | 983  | 8:1:1 | -3.51 | -8.33  | 4.82 | UUUUUG AAATTCT<br>GAGCAG TTTTAAG<br>G<br>GUGCAU           | 8 |
| hsa-miR-33a     | 708  | 8:1:1 | -7.2  | -12.02 | 4.82 | UGUAGU ATAATAC<br>UGCAUU ACTA<br>GCA<br>GUGGUU            | 8 |
| hsa-miR-487b    | 1274 | 8:1:1 | -5.2  | -10.03 | 4.83 | AUCCCU TGTATTA<br>GUCCUG TGTA<br>UUCG<br>AUUCCU           | 8 |
| hsa-miR-384     | 1205 | 8:1:1 | -3.4  | -8.23  | 4.83 | AGAAAU TTTAAGA<br>UGUUCA AATATAT<br>UA ATATA<br>UGACAA    | 8 |
| hsa-miR-549     | 1089 | 8:1:1 | -6.85 | -11.68 | 4.83 | CUAUGG TATTTGT<br>AUGAGC TTATTGT<br>UCU<br>CUUUUU         | 8 |
| hsa-miR-129-5p  | 1032 | 8:1:1 | -6.3  | -11.15 | 4.85 | GCGGUC CGTATAA<br>UGGGUC AATAAA<br>UGC A<br>UGUUCA        | 8 |
| hsa-miR-1206    | 999  | 8:1:1 | -5.9  | -10.76 | 4.86 | UGUAGA ATATGAA<br>UGUUUA GAATTTT<br>AGC T<br>AGGUUG       | 8 |
| hsa-miR-656     | 1067 | 8:1:1 | -4    | -8.87  | 4.87 | CCUGUG CATAGTA<br>AGGUGU TATAT<br>UCA<br>UUAUAA           | 8 |
| hsa-miR-340     | 580  | 8:1:1 | -6.95 | -11.84 | 4.89 | AGCAAU GTTTTAT<br>GAGACU TTGTATA<br>GAUU ATA<br>AGGUUG    | 8 |
| hsa-miR-494     | 477  | 8:0:1 | -6.4  | -11.29 | 4.89 | UCCGUG TATGTTT<br>UUGUCU TAT<br>UCUCU<br>AAAAGU           | 8 |
| hsa-miR-548b-5p | 305  | 8:1:1 | 0.4   | -4.49  | 4.89 | AAUUGU ATTTTTTT<br>GGUUUU TTCA<br>GGCC<br>CACUAG          | 8 |
| hsa-miR-28-3p   | 753  | 8:1:0 | -3.6  | -8.5   | 4.9  | AUUGUG AATATAG<br>AGCUCC TAACAA<br>UGGA CGAA<br>UCUAUA    | 8 |
| hsa-miR-1284    | 587  | 8:1:1 | -7    | -11.9  | 4.9  | CAGACC TTGTATA<br>CUGGCU ATAT<br>UUUC                     | 8 |

|                |      |       |       |        |      |                                              |                             |   |
|----------------|------|-------|-------|--------|------|----------------------------------------------|-----------------------------|---|
| hsa-miR-561    | 573  | 8:1:1 | -5.52 | -10.42 | 4.9  | AUCAAG<br>GAUCUU<br>AAACUU<br>UGCC<br>UUCAAG | TAAATTT<br>GTTTT            | 8 |
| hsa-miR-26b    | 1088 | 8:1:1 | -6.9  | -11.81 | 4.91 | UAAUUC<br>AGGAUA<br>GGU<br>CAGUAA            | TTATTTG<br>TTTA             | 8 |
| hsa-miR-802    | 246  | 8:1:1 | -7    | -11.93 | 4.93 | CAAAGA<br>UUCAUC<br>CUUGU<br>UAUACA          | TTGTTTT<br>TGTATAA<br>TATT  | 8 |
| hsa-miR-300    | 585  | 8:1:1 | -7.7  | -12.64 | 4.94 | AGGGCA<br>GACUCU<br>CUCU<br>UGUAAA           | ATTTGTA<br>TAATATG<br>TATGT | 8 |
| hsa-miR-30a    | 369  | 8:1:1 | -0.4  | -5.35  | 4.95 | CAUCCU<br>CGACUG<br>GAAG<br>UGUAAA           | ATTTTTA<br>TTTTGTT<br>TGTAT | 8 |
| hsa-miR-30c    | 369  | 8:1:1 | -0.4  | -5.35  | 4.95 | CAUCCU<br>ACACUC<br>UCAGC<br>UGUAAA          | ATTTTTA<br>TTTTGTT          | 8 |
| hsa-miR-30d    | 369  | 8:1:1 | -0.4  | -5.35  | 4.95 | CAUCCC<br>CGACUG<br>GAAG<br>UGUAAA           | ATTTTTA<br>TTTTGTT          | 8 |
| hsa-miR-30b    | 369  | 8:1:1 | -0.4  | -5.35  | 4.95 | CAUCCU<br>ACACUC<br>AGCU<br>UAAAGU           | ATTTTTA<br>TTT              | 8 |
| hsa-miR-559    | 313  | 8:1:1 | -0.6  | -5.56  | 4.96 | AAAUAU<br>GCACCA<br>AAA<br>UGUAAA            | TTCATTT<br>TATTTTT          | 8 |
| hsa-miR-30c    | 299  | 8:1:1 | -2.84 | -7.8   | 4.96 | CAUCCU<br>ACACUC<br>UCAGC<br>UGUGAC          | ATTTTTA<br>TTTTTTTT         | 8 |
| hsa-miR-542-3p | 497  | 8:1:1 | -9.1  | -14.07 | 4.97 | AGAUUG<br>AUAACU<br>GAAA<br>UCAUUAU          | TTTGACA<br>CATTTGA<br>TT    | 8 |
| hsa-miR-1279   | 996  | 8:1:0 | -5.3  | -10.28 | 4.98 | UGCUUC<br>UUUCU<br>UCCCCG<br>AGACCC          | GAAATAT<br>GAAGAA<br>T      | 8 |
| hsa-miR-1259   | 808  | 8:1:0 | -3.3  | -8.28  | 4.98 | UUUAAC<br>CUGUGA<br>AAAAGU<br>AAUUGC         | ATAATAT<br>AATAA            | 8 |
| hsa-miR-548i   | 318  | 8:1:1 | -2.7  | -7.68  | 4.98 | GGAUUU<br>UGCC<br>AAAAGU<br>AAUUGC           | TTTATTTT<br>TGATTT          | 8 |
| hsa-miR-548j   | 35   | 8:0:1 | -3.46 | -8.44  | 4.98 | GGUCUU<br>UGGU<br>UUCAAG                     | ATTATTT<br>TACTTG           | 8 |
| hsa-miR-26a    | 583  | 8:1:1 | -7.8  | -12.79 | 4.99 | UAAUCC<br>AGGAUA<br>GGCU<br>UUUAUA           | TTATTTG<br>TATAATA<br>TG    | 8 |
| hsa-miR-374a   | 871  | 8:1:0 | -4.4  | -9.41  | 5.01 | JACAAC<br>CUGAUA<br>AGUG                     | GTAATAT<br>ATCATAT<br>ATAAT | 8 |

|                 |      |       |       |        |      |                                               |                             |   |
|-----------------|------|-------|-------|--------|------|-----------------------------------------------|-----------------------------|---|
| hsa-miR-340     | 454  | 8:1:1 | -6.3  | -11.31 | 5.01 | UUUUAUA<br>AGCAAU<br>GAGACU<br>GAUU<br>UUGCAU | GTTTTAT<br>TTGTATA          | 8 |
| hsa-miR-448     | 784  | 8:1:1 | -3.4  | -8.42  | 5.02 | AUGUAG<br>GAUGUC<br>CCAU<br>AUUUAUA           | CATATAC<br>GGA              | 8 |
| hsa-miR-374b    | 154  | 8:1:0 | -5    | -10.02 | 5.02 | UACAAC<br>CUGCUA<br>AGUG                      | GTATAAT<br>AAT              | 8 |
| hsa-miR-568     | 732  | 8:1:1 | -3    | -8.06  | 5.06 | AUGUAU<br>AAAUGU<br>AUACAC<br>AC              | TATATAT<br>ATATATA<br>TATA  | 8 |
| hsa-miR-548f    | 353  | 8:1:1 | -0.3  | -5.37  | 5.07 | UGCAAA<br>AGUAAU<br>CACAGU<br>UUUU            | ATAATTT<br>TAATATA<br>TAATT | 8 |
| hsa-miR-577     | 455  | 8:0:1 | -6.1  | -11.18 | 5.08 | UAGUAU<br>AAAUAU<br>UGGUAC<br>CUG             | TTTTATTT<br>GTATAAT<br>ATAT | 8 |
| hsa-miR-454     | 38   | 8:1:1 | -4.87 | -9.97  | 5.1  | ACCCUA<br>UCAUAU<br>UUGUCU<br>CUGC            | ATTTTAC<br>TTG              | 8 |
| hsa-miR-548p    | 193  | 8:1:0 | -6.7  | -11.81 | 5.11 | UAGCAA<br>AAACUG<br>CAGUUA<br>CUUU            | TTTTGGC<br>TTTTAT           | 8 |
| hsa-miR-421     | 286  | 8:1:1 | -4.8  | -9.92  | 5.12 | AUCAAC<br>AGACAU<br>UAAUUG<br>GGCGC           | TTTTTTG<br>AGTAA            | 8 |
| hsa-miR-374a    | 154  | 8:1:0 | -4.9  | -10.02 | 5.12 | UUUUAUA<br>UACAAC<br>CUGUAU<br>AGUG           | GTATAAT<br>AAT              | 8 |
| hsa-miR-30d     | 1236 | 8:1:1 | -3.35 | -8.48  | 5.13 | UGUAAA<br>CAUCCC<br>CGACUG<br>GAAG            | ATGATTA<br>TAA              | 8 |
| hsa-miR-600     | 989  | 8:1:1 | -3.4  | -8.54  | 5.14 | ACUUAC<br>AGACAA<br>GAGCCU<br>UGCUC           | TTTTTAA<br>GAAATAT<br>GAAGA | 8 |
| hsa-miR-487b    | 588  | 8:1:1 | -6.73 | -11.87 | 5.14 | GUGGUU<br>AUCCCU<br>GUCCUG<br>UUCG            | TGTATAA<br>TATGTAT<br>GTGAT | 8 |
| hsa-miR-576-5p  | 1238 | 8:1:1 | -3.4  | -8.55  | 5.15 | AUUCUA<br>AUUUCU<br>CCACGU<br>CUUU            | GATTATA<br>ATATAT           | 8 |
| hsa-miR-548d-3p | 326  | 8:1:0 | -0.6  | -5.75  | 5.15 | CAAAAA<br>CCACAG<br>UUUCUU<br>UUGC            | TGATTTT<br>TTTTTT           | 8 |
| hsa-miR-548n    | 928  | 8:1:1 | -4.02 | -9.18  | 5.16 | CAAAAG<br>UAAUUG<br>UGGAUU<br>UUGU            | TTTTTTTT<br>TTTT            | 8 |
| hsa-miR-802     | 370  | 8:1:1 | -0.2  | -5.36  | 5.16 | CAGUAA<br>CAAAGA<br>UUCAUC<br>CUUGU           | TTTTTATT<br>TTGTTTG         | 8 |

|                 |      |       |       |        |      |                                     |                             |   |
|-----------------|------|-------|-------|--------|------|-------------------------------------|-----------------------------|---|
| hsa-miR-1246    | 1211 | 8:1:1 | -3    | -8.18  | 5.18 | AAUGGA<br>UUUUUG<br>GAGCAG<br>G     | AAATATA<br>TATATAA<br>TAA   | 8 |
| hsa-miR-577     | 943  | 8:1:1 | -1.9  | -7.08  | 5.18 | UAGUAU<br>AAAUAU<br>UGGUAC<br>CUG   | TTTTGTA<br>TTCATAC<br>ATA   | 8 |
| hsa-miR-568     | 734  | 8:1:1 | -3.1  | -8.28  | 5.18 | AUGUAU<br>AAAUGU<br>AUACAC<br>AC    | TATATAT<br>ATATATA<br>TATTT | 8 |
| hsa-miR-369-3p  | 153  | 8:1:0 | -5.1  | -10.28 | 5.18 | AAUAAU<br>ACAUGG<br>UUGAUC<br>UUU   | TGTATAA<br>TAATATT<br>TGTA  | 8 |
| hsa-miR-26b     | 583  | 8:1:1 | -7.6  | -12.79 | 5.19 | UUCAAG<br>UAAUUC<br>AGGAUA<br>GGU   | TTATTTG<br>TATAA            | 8 |
| hsa-miR-153     | 1122 | 8:1:1 | -5.74 | -10.94 | 5.2  | UCAUUU<br>UUGUGA<br>UGUUGC<br>AGCU  | AATATGT<br>AGTA             | 8 |
| hsa-miR-548n    | 41   | 8:1:0 | -5.8  | -11    | 5.2  | CAAAAAG<br>UAAUUG<br>UGGAUU<br>UUGU | TTACTTG<br>TTTATTTT<br>TTTT | 8 |
| hsa-miR-511     | 26   | 8:1:1 | -3.26 | -8.46  | 5.2  | GUGUCU<br>UUUGCU<br>CUGCAG<br>UCA   | AAAAAA<br>TATATTA<br>TTTT   | 8 |
| hsa-miR-369-3p  | 1095 | 8:1:1 | -4.8  | -10.01 | 5.21 | AAUAAU<br>ACAUGG<br>UUGAUC<br>UUU   | TTTATTG<br>TATAA            | 8 |
| hsa-miR-142-3p  | 1223 | 8:1:1 | -3.85 | -9.07  | 5.22 | UGUAGU<br>GUUUCC<br>UACUUU<br>AUGGA | AATAATA<br>CACGTTA<br>TGATT | 8 |
| hsa-miR-548n    | 931  | 8:1:1 | -3.29 | -8.52  | 5.23 | CAAAAAG<br>UAAUUG<br>UGGAUU<br>UUGU | TTTTTTTT<br>TT              | 8 |
| hsa-miR-559     | 307  | 8:1:1 | 0.89  | -4.34  | 5.23 | UAAAGU<br>AAAUAU<br>GCACCA<br>AAA   | TTTTTTTT<br>CATT            | 8 |
| hsa-miR-885-5p  | 1281 | 8:1:0 | -4.3  | -9.54  | 5.24 | UCCAUU<br>ACACUA<br>CCCUGC<br>CUCU  | TGTAATA<br>GTA              | 8 |
| hsa-miR-548a-5p | 318  | 8:1:1 | -2.44 | -7.68  | 5.24 | AAAAGU<br>AAUUGC<br>GAGUUU<br>UACC  | TTTATTTT<br>TGATTTT<br>TT   | 8 |
| hsa-miR-522     | 90   | 8:1:1 | -6.19 | -11.43 | 5.24 | CUCUAG<br>AGGGAA<br>GCGCUU<br>UCUG  | ATTCATT<br>TGTAT            | 8 |
| hsa-miR-487b    | 913  | 8:1:1 | -6.2  | -11.45 | 5.25 | GUGGUU<br>AUCCCU<br>GUCCUG<br>UUCG  | TATATGA<br>TATCCTT<br>T     | 8 |
| hsa-miR-491-3p  | 166  | 8:1:1 | -6.3  | -11.55 | 5.25 | CUUAUG<br>CAAGAU<br>UCCCUU<br>CUAC  | TTGTATA<br>TAT              | 8 |

|                |      |       |       |        |      |                                                |                             |   |
|----------------|------|-------|-------|--------|------|------------------------------------------------|-----------------------------|---|
| hsa-miR-1284   | 166  | 8:1:1 | -6.3  | -11.55 | 5.25 | UCUAUA<br>CAGACC<br>CUGGCU<br>UUUC<br>GGAUUAU  | TTGTATA<br>TATA             | 8 |
| hsa-miR-144    | 131  | 8:1:1 | -7.8  | -13.05 | 5.25 | CAUCAU<br>AUACUG<br>UAAG<br>AGGUUG             | TATATTT<br>TTATTTT          | 8 |
| hsa-miR-656    | 717  | 8:1:0 | -0.7  | -5.97  | 5.27 | CCUGUG<br>AGGUGU<br>UCA                        | TAAAATA<br>TTTCTTA          | 8 |
| hsa-miR-641    | 245  | 8:1:1 | -6.6  | -11.87 | 5.27 | AAAGAC<br>AUAGGA<br>UAGAGU<br>CACCUC<br>UGCAAC | TTTGTTT<br>TTGTATA<br>ATAT  | 8 |
| hsa-miR-891a   | 1054 | 8:1:1 | -3.7  | -8.98  | 5.28 | GAACCU<br>GAGCCA<br>CUGA<br>UGGUUG             | TTCCTTG<br>TTT              | 8 |
| hsa-miR-380    | 385  | 8:1:1 | -3.4  | -8.69  | 5.29 | ACCAUA<br>GAACAU<br>GCGC                       | TATAATA<br>TATATAA<br>AT    | 8 |
| hsa-miR-374b   | 254  | 8:1:0 | -5.3  | -10.59 | 5.29 | AUAUAA<br>UACAAC<br>CUGCUA<br>AGUG<br>GUGUGU   | GTATAAT<br>ATTICTA<br>A     | 8 |
| hsa-miR-147    | 498  | 8:1:1 | -8.1  | -13.4  | 5.3  | GGAAAU<br>GCUUCU<br>GC                         | TTGACAC<br>ATTTG            | 8 |
| hsa-miR-577    | 312  | 8:1:1 | 0.1   | -5.22  | 5.32 | UAGAUUA<br>AAAUUAU<br>UGGUAC<br>CUG            | TTTCATT<br>TTATTTTT<br>GA   | 8 |
| hsa-miR-181d   | 596  | 8:1:0 | -6.6  | -11.93 | 5.33 | AACAUU<br>CAUUGU<br>UGUCGG<br>UGGGU            | ATGTATG<br>TGATTAA          | 8 |
| hsa-miR-1284   | 252  | 8:1:1 | -6.8  | -12.13 | 5.33 | UCUAUA<br>CAGACC<br>CUGGCU<br>UUUC<br>CUAGGU   | TTGTATA<br>ATATTTT<br>TAAA  | 8 |
| hsa-miR-331-5p | 880  | 8:1:1 | -5.1  | -10.44 | 5.34 | AUGGUC<br>CCAGGG<br>AUCC<br>AGCGAG             | CATATAT<br>AATA             | 8 |
| hsa-miR-381    | 585  | 8:1:1 | -7.3  | -12.64 | 5.34 | GUUGCC<br>CUUUGU<br>AUUAU                      | ATTTGTA<br>TAATAT           | 8 |
| hsa-miR-569    | 1013 | 8:1:1 | -6.03 | -11.39 | 5.36 | AGUUAA<br>UGAAUC<br>CUGGAA<br>AGU              | TTTTTAA<br>CGCTTCT<br>AATTA | 8 |
| hsa-miR-410    | 943  | 8:1:1 | -1.7  | -7.08  | 5.38 | AGGUUG<br>UCUGUG<br>AUGAGU<br>UCG              | TTTTGTA<br>TTCAT            | 8 |
| hsa-miR-628-3p | 40   | 8:1:1 | -4.7  | -10.09 | 5.39 | UCUAGU<br>AAGAGU<br>GGCAGU<br>CGA              | TTTACTT<br>GTTTAT           | 8 |
| hsa-miR-548n   | 930  | 8:1:1 | -3.86 | -9.28  | 5.42 | CAAAAG<br>UAAUUG<br>UGGAUU<br>UUGU             | TTTTTTTT<br>TT              | 8 |

|                 |      |       |       |        |      |                                           |                            |   |
|-----------------|------|-------|-------|--------|------|-------------------------------------------|----------------------------|---|
| hsa-miR-491-3p  | 461  | 8:0:1 | -7.1  | -12.52 | 5.42 | CUUAUG<br>CAAGAU<br>UCCCUU<br>CUAC        | TTGTATA<br>ATATATA<br>TAT  | 8 |
| hsa-miR-26a     | 286  | 8:1:1 | -4.5  | -9.92  | 5.42 | UUCAAG<br>JAAUCC<br>AGGAUA<br>GGCU        | TTTTTTG<br>AGTAATA<br>TTT  | 8 |
| hsa-miR-548n    | 927  | 8:1:1 | -3.6  | -9.03  | 5.43 | CAAAAG<br>JAAUUG<br>UGGAUU<br>UUGU        | TTTTTTTT<br>TTTTTTT        | 8 |
| hsa-miR-487b    | 253  | 8:1:1 | -6.3  | -11.73 | 5.43 | GUGGUU<br>AUCCCU<br>GUCCUG<br>UUCG        | TGTATAA<br>TATTTCT         | 8 |
| hsa-miR-410     | 1276 | 8:1:1 | -5.3  | -10.75 | 5.45 | AGGUUG<br>UCUGUG<br>AUGAGU<br>UCG         | TATTATG<br>TAATAGT<br>A    | 8 |
| hsa-miR-568     | 201  | 8:0:1 | -8.06 | -13.52 | 5.46 | AUGUAU<br>AAAUGU<br>AUACAC<br>AC          | TTTATAT<br>AAT             | 8 |
| hsa-miR-544     | 1125 | 8:1:1 | -8.1  | -13.57 | 5.47 | AUUCUG<br>CAUUUU<br>UAGCAA<br>GUUC        | ATGTAGT<br>AATTAAT<br>TA   | 8 |
| hsa-miR-203     | 874  | 8:1:1 | -5.46 | -10.93 | 5.47 | AGUGGU<br>UCUUAA<br>CAGUUC<br>AACAGU<br>U | ATATATC<br>ATA             | 8 |
| hsa-miR-548d-5p | 849  | 8:1:1 | -2.3  | -7.79  | 5.49 | AAAAGU<br>AAUUGU<br>GGUUUU<br>UGCC        | ATTATTA<br>TAAAA           | 8 |
| hsa-miR-32      | 1100 | 8:1:1 | -5.8  | -11.3  | 5.5  | UAUJGC<br>ACAUUA<br>CUAAGU<br>UGCA        | TGTATAA<br>TAATATA<br>T    | 8 |
| hsa-miR-548m    | 919  | 8:1:1 | -5.7  | -11.2  | 5.5  | CAAAGG<br>UAUUUG<br>UGGUUU<br>UUG         | ATATCCT<br>TTTTTTTT<br>TT  | 8 |
| hsa-miR-410     | 870  | 8:1:0 | -3    | -8.51  | 5.51 | AGGUUG<br>UCUGUG<br>AUGAGU<br>UCG         | TGTAATA<br>TATCATA         | 8 |
| hsa-miR-1284    | 461  | 8:1:1 | -7    | -12.52 | 5.52 | UCUAUA<br>CAGACC<br>CUGGCU<br>UUUC        | TTGTATA<br>ATATAT          | 8 |
| hsa-miR-520d-5p | 458  | 8:1:1 | -5.7  | -11.24 | 5.54 | CUACAA<br>AGGGAA<br>GCCCUU<br>UC          | TATTTGT<br>ATAATA          | 8 |
| hsa-miR-548m    | 745  | 8:1:1 | -2.8  | -8.35  | 5.55 | CAAAGG<br>UAUUUG<br>UGGUUU<br>UUG         | ATATATT<br>TAAT            | 8 |
| hsa-miR-539     | 258  | 8:1:1 | -4.2  | -9.75  | 5.55 | GGAGAA<br>AUUAUC<br>CUUGGU<br>GUGU        | AATATTT<br>CTAAATA         | 8 |
| hsa-miR-374a    | 98   | 8:1:0 | -5.6  | -11.15 | 5.55 | UUAUAA<br>UACAAC<br>CUGAUA<br>AGUG        | GTATAAT<br>ATAAATA<br>TATA | 8 |

|                 |      |       |       |        |      |                                               |                             |   |
|-----------------|------|-------|-------|--------|------|-----------------------------------------------|-----------------------------|---|
| hsa-miR-1290    | 981  | 8:1:1 | -2.9  | -8.47  | 5.57 | UGGAUU<br>UUUGGA<br>UCAGGG<br>A<br>CUACAA     | ATAAATT<br>CTTTTAA<br>AG    | 8 |
| hsa-miR-524-5p  | 584  | 8:1:1 | -7.2  | -12.77 | 5.57 | AGGGAA<br>GCACUU<br>UCUC<br>UAGCAA            | TATTTGT<br>ATAATA           | 8 |
| hsa-miR-548p    | 1089 | 8:1:1 | -6.1  | -11.68 | 5.58 | AAACUG<br>CAGUUA<br>CUUU                      | TATTTGT<br>TTA              | 8 |
| hsa-miR-548c-5p | 318  | 8:1:1 | -2.1  | -7.68  | 5.58 | AAAAGU<br>AAUUGC<br>GGUUUU<br>UGCC            | TTTATTTT<br>TGATTTT<br>T    | 8 |
| hsa-miR-548j    | 318  | 8:1:1 | -2.1  | -7.68  | 5.58 | AAAAGU<br>AAUUGC<br>GGUCUU<br>UGGU            | TTTATTTT<br>TGATTTT<br>TTTT | 8 |
| hsa-miR-548h    | 318  | 8:1:1 | -2.1  | -7.68  | 5.58 | AAAAGU<br>AAUCGC<br>GGUUUU<br>UGUC            | TTTATTTT<br>TGA             | 8 |
| hsa-miR-375     | 1001 | 8:1:1 | -4.4  | -10    | 5.6  | UUUGUU<br>CGUUCG<br>GCUCGC<br>GUGA            | ATGAAG<br>AATTTTT<br>TTTTA  | 8 |
| hsa-miR-337-3p  | 894  | 8:1:1 | -7.4  | -13    | 5.6  | CUCCUA<br>UAUGAU<br>GCCUUU<br>CUUC            | GTATTGG<br>AATAAC<br>AATA   | 8 |
| hsa-miR-186     | 284  | 8:0:1 | -4.2  | -9.81  | 5.61 | CAAAGA<br>AUUCUC<br>CUUUUG<br>GGCU            | AATTTTT<br>TGAGTA           | 8 |
| hsa-miR-450b-5p | 1098 | 8:1:1 | -5.4  | -11.02 | 5.62 | UUUUGC<br>AAUAUG<br>UUCCUG<br>AAUA            | ATTGTAT<br>AATAATA<br>TATT  | 8 |
| hsa-miR-767-5p  | 681  | 8:1:1 | -8.4  | -14.02 | 5.62 | UGCACC<br>AUGGUU<br>GUCUGA<br>GCAUG<br>UGGUUG | TATGGTT<br>CCATATT          | 8 |
| hsa-miR-380     | 877  | 8:1:1 | -4.6  | -10.23 | 5.63 | ACCAUA<br>GAACAU<br>GCGC                      | TATCATA<br>TATAAT           | 8 |
| hsa-miR-548l    | 35   | 8:1:1 | -2.81 | -8.44  | 5.63 | AAAAGU<br>AUUUGC<br>GGGUUU<br>UGUC            | ATTATTT<br>TACTTGT<br>TTAT  | 8 |
| hsa-miR-557     | 1032 | 8:1:1 | -5.5  | -11.15 | 5.65 | GUUUGC<br>ACGGGU<br>GGGCCU<br>UGUCU           | CGTATAA<br>AAT              | 8 |
| hsa-miR-559     | 330  | 8:1:1 | 1.4   | -4.26  | 5.66 | UAAAGU<br>AAAUAU<br>GCACCA<br>AAA             | TTTTTTTT<br>TAAAT           | 8 |
| hsa-miR-186     | 296  | 8:1:1 | -2.4  | -8.06  | 5.66 | CAAAGA<br>AUUCUC<br>CUUUUG<br>GGCU            | AATATTT<br>TTATTTT<br>TTT   | 8 |
| hsa-miR-190     | 108  | 8:1:1 | -6.7  | -12.36 | 5.66 | UGAUAU<br>GUUUGA<br>UAUAUU<br>AGGU            | AATATAT<br>ATATTCA<br>TAGT  | 8 |

|                |      |       |       |        |      |                                              |                             |   |
|----------------|------|-------|-------|--------|------|----------------------------------------------|-----------------------------|---|
| hsa-miR-548f   | 297  | 8:1:1 | -2.3  | -7.97  | 5.67 | UGCAAA<br>AGUAAU<br>CACAGU<br>UUUU<br>GUGUCU | ATATTTT<br>TATTTTTT         | 8 |
| hsa-miR-511    | 28   | 8:1:1 | -3.13 | -8.8   | 5.67 | UUUGCU<br>CUGCAG<br>UCA<br>UGUAAA            | AAAATAT<br>ATTA             | 8 |
| hsa-miR-30c    | 1236 | 8:1:1 | -2.8  | -8.48  | 5.68 | CAUCCU<br>ACACUC<br>UCAGC<br>UGUAAA          | ATGATTA<br>TAAT             | 8 |
| hsa-miR-30b    | 1236 | 8:1:1 | -2.8  | -8.48  | 5.68 | CAUCCU<br>ACACUC<br>AGCU                     | ATGATTA<br>TAATATA<br>TT    | 8 |
| hsa-miR-369-3p | 893  | 8:1:1 | -7.1  | -12.78 | 5.68 | AAUAAU<br>ACAUGG<br>UUGAUC<br>UUU            | TGTATTG<br>GAATAA<br>CA     | 8 |
| hsa-miR-885-5p | 893  | 8:1:0 | -7.1  | -12.78 | 5.68 | UCCAUU<br>ACACUA<br>CCCUGC<br>CUCU           | TGTATTG<br>GAATAA<br>CAATA  | 8 |
| hsa-miR-1264   | 207  | 8:1:1 | -6.4  | -12.09 | 5.69 | CAAGUC<br>UUUUUU<br>GAGCAC<br>CUGUU          | TAATATT<br>TGTAAT<br>A      | 8 |
| hsa-miR-26a    | 36   | 8:1:1 | -3.4  | -9.09  | 5.69 | UUCAAG<br>UAAUCC<br>AGGAUA<br>GGCU           | TTATTTT<br>ACTTGTT<br>TATT  | 8 |
| hsa-miR-656    | 1105 | 8:1:0 | -7.5  | -13.2  | 5.7  | AGGUUG<br>CCUGUG<br>AGGUGU<br>UCA            | AATAATA<br>TATTTAT<br>TAAAA | 8 |
| hsa-miR-568    | 228  | 8:1:1 | -8.4  | -14.1  | 5.7  | AUGUAU<br>AAAUGU<br>AUACAC<br>AC             | TATATAT<br>AATTTGT<br>TTTTT | 8 |
| hsa-miR-1297   | 1088 | 8:1:1 | -6.1  | -11.81 | 5.71 | UUCAAG<br>UAAUUC<br>AGGUG                    | TTATTTG<br>TTTA             | 8 |
| hsa-miR-369-3p | 32   | 8:1:0 | -3.2  | -8.91  | 5.71 | AAUAAU<br>ACAUGG<br>UUGAUC<br>UUU            | TATATTA<br>TTTTA            | 8 |
| hsa-miR-1284   | 1099 | 8:1:1 | -5.5  | -11.22 | 5.72 | UCUAUA<br>CAGACC<br>CUGGCU<br>UUUC           | TTGTATA<br>ATAATAT<br>ATTT  | 8 |
| hsa-miR-524-5p | 987  | 8:1:1 | -3.1  | -8.83  | 5.73 | CUACAA<br>AGGGAA<br>GCACUU<br>UCUC           | TCTTTTT<br>AAGA             | 8 |
| hsa-miR-208b   | 987  | 8:1:1 | -3.1  | -8.83  | 5.73 | AAGCUU<br>UUUGCU<br>CGAAUU<br>AUGU           | TCTTTTT<br>AAGAAA<br>TATGA  | 8 |
| hsa-miR-556-3p | 668  | 8:1:1 | -4.1  | -9.83  | 5.73 | AUAUUA<br>CCAUUA<br>GCUCAU<br>CUUU           | TAGTAGT<br>ATATTAT<br>A     | 8 |
| hsa-miR-144    | 32   | 8:1:1 | -3.17 | -8.91  | 5.74 | GGAUUA<br>CAUCAU<br>AUACUG<br>UAAG           | TATATTA<br>TTTTAC           | 8 |

|                 |      |       |       |        |      |                                              |                            |   |
|-----------------|------|-------|-------|--------|------|----------------------------------------------|----------------------------|---|
| hsa-miR-548n    | 932  | 8:1:1 | -2.73 | -8.48  | 5.75 | CAAAAG<br>UAAUUG<br>UGGAUU<br>UUGU<br>UAGAUU | TTTTTTTT<br>TTTT           | 8 |
| hsa-miR-577     | 581  | 8:0:1 | -6.1  | -11.85 | 5.75 | AAAUAU<br>UGGUAC<br>CUG<br>GGAGAA            | TTTTATTT<br>GTATAAT        | 8 |
| hsa-miR-539     | 235  | 8:1:1 | -6.5  | -12.25 | 5.75 | AUUUAUC<br>CUUGGU<br>GUGU<br>AAAAGU          | AATTTGT<br>TTTTTTG<br>TTT  | 8 |
| hsa-miR-548j    | 985  | 8:1:1 | -3.5  | -9.26  | 5.76 | AAUUGC<br>GGUCUU<br>UGGU<br>AGUUUU           | ATTCTTT<br>TTAAGAA         | 8 |
| hsa-miR-19a     | 1249 | 8:1:1 | -5.2  | -10.97 | 5.77 | GCAUAG<br>UUGCAC<br>UACA<br>CAAAAA           | ATTTGAA<br>TAAC            | 8 |
| hsa-miR-548d-3p | 1058 | 8:1:0 | -3.3  | -9.07  | 5.77 | CCACAG<br>UUUCUU<br>UUGC<br>AAGCAU           | TTGTTTT<br>TCCAT           | 8 |
| hsa-miR-1179    | 1005 | 8:1:1 | -5.2  | -10.97 | 5.77 | UCUUUC<br>AUUGGU<br>UGG<br>CAAAGA            | AGAATTT<br>TTT             | 8 |
| hsa-miR-583     | 415  | 8:1:1 | -3    | -8.78  | 5.78 | GGAAGG<br>UCCCAU<br>UAC<br>UACUGC            | TTCTATT<br>TGACAC<br>A     | 8 |
| hsa-miR-509-5p  | 1124 | 8:1:1 | -7.67 | -13.46 | 5.79 | AGACAG<br>UGGCAA<br>UCA<br>CAAAAG            | TATGTAG<br>TAATTAA         | 8 |
| hsa-miR-548e    | 319  | 8:1:1 | -1.9  | -7.69  | 5.79 | CAAUCG<br>CGGUUU<br>UUGC<br>UCUUGU           | TTATTTTT<br>GATT           | 8 |
| hsa-miR-581     | 1257 | 8:1:1 | -5.22 | -11.04 | 5.82 | GUUCUC<br>UAGAUC<br>AGU<br>CAAAAG            | AACATA<br>AAACAA<br>TA     | 8 |
| hsa-miR-548n    | 986  | 8:1:1 | -3.2  | -9.02  | 5.82 | UAAUUG<br>UGGAUU<br>UUGU<br>AACAUU           | TTCTTTTT<br>AAGA           | 8 |
| hsa-miR-181c    | 556  | 8:1:1 | -5.2  | -11.03 | 5.83 | CAACCU<br>GUCGGU<br>GAGU<br>CAAAAG           | TTGGATA<br>TTTGT           | 8 |
| hsa-miR-548n    | 132  | 8:1:1 | -7.01 | -12.84 | 5.83 | UAAUUG<br>UGGAUU<br>UUGU<br>UAAAGU           | ATATTTT<br>TATTTTG<br>ATA  | 8 |
| hsa-miR-559     | 522  | 8:1:1 | -9    | -14.84 | 5.84 | AAAUAU<br>GCACCA<br>AAA<br>CAAGUC            | TATATTT<br>TGTTTGA<br>ATTT | 8 |
| hsa-miR-1264    | 257  | 8:1:1 | -4    | -9.84  | 5.84 | UUUUUU<br>GAGCAC<br>CUGUU<br>AGGUUG          | TAATATT<br>TCTAAA          | 8 |
| hsa-miR-494     | 549  | 8:1:1 | -4.02 | -9.87  | 5.85 | UCCGUG<br>UUGUCU<br>UCUCU                    | TTTGTTT<br>TTGG            | 8 |

|                 |      |       |       |        |      |                                     |                            |   |
|-----------------|------|-------|-------|--------|------|-------------------------------------|----------------------------|---|
| hsa-miR-589     | 1059 | 8:1:1 | -3.2  | -9.06  | 5.86 | UGAGAA<br>CCACGU<br>CUGCUC<br>UGAG  | TGTTTT<br>CCATAGT<br>ATAT  | 8 |
| hsa-miR-20b     | 1005 | 8:1:1 | -5.1  | -10.97 | 5.87 | CAAAGU<br>GCUCAU<br>AGUGCA<br>GGUAG | AGAATTT<br>TTTTTTA<br>ACG  | 8 |
| hsa-miR-568     | 565  | 8:1:1 | -5.8  | -11.67 | 5.87 | AUGUAU<br>AAAUGU<br>AUACAC<br>AC    | TGTATAT<br>ATAAATT<br>TGT  | 8 |
| hsa-miR-548c-3p | 297  | 8:1:0 | -2.1  | -7.97  | 5.87 | CAAAAA<br>UCUCAA<br>UUACUU<br>UUGC  | ATATTTT<br>TATTT           | 8 |
| hsa-miR-300     | 164  | 8:1:1 | -6.6  | -12.48 | 5.88 | UUAUCA<br>AGGGCA<br>GACUCU<br>CUCU  | ATTTGTA<br>TATATA          | 8 |
| hsa-miR-548n    | 926  | 8:1:1 | -3.2  | -9.09  | 5.89 | CAAAAAG<br>UAAUUG<br>UGGAUU<br>UUGU | TTTTTTTT<br>TTT            | 8 |
| hsa-miR-494     | 489  | 8:1:1 | -7.9  | -13.79 | 5.89 | AGGUUG<br>UCCGUG<br>UUGUCU<br>UCUCU | TGTGTTT<br>ATTTGAC<br>ACA  | 8 |
| hsa-miR-1290    | 27   | 8:1:1 | -2.5  | -8.39  | 5.89 | UGGAUU<br>UUUGGA<br>UCAGGG<br>A     | AAAAAT<br>ATATTAT<br>T     | 8 |
| hsa-miR-374a    | 894  | 8:1:1 | -7.1  | -13    | 5.9  | UUUAUA<br>UACAAC<br>CUGAUA<br>AGUG  | GTATTGG<br>AATAA           | 8 |
| hsa-miR-369-3p  | 383  | 8:1:0 | -3.4  | -9.3   | 5.9  | AAUAAU<br>ACAUGG<br>UUGAUC<br>UUU   | TGTATAA<br>TATATAT<br>A    | 8 |
| hsa-miR-568     | 167  | 8:1:1 | -5.54 | -11.44 | 5.9  | AUGUAU<br>AAAUGU<br>AUACAC<br>AC    | TGTATAT<br>ATA             | 8 |
| hsa-miR-548n    | 925  | 8:1:1 | -2.96 | -8.87  | 5.91 | CAAAAAG<br>UAAUUG<br>UGGAUU<br>UUGU | TTTTTTTT<br>TTT            | 8 |
| hsa-miR-656     | 1034 | 8:1:0 | -5.3  | -11.22 | 5.92 | AGGUUG<br>CCUGUG<br>AGGUGU<br>UCA   | TATAAAA<br>TAAAAAT         | 8 |
| hsa-miR-548n    | 933  | 8:1:1 | -2.5  | -8.43  | 5.93 | CAAAAAG<br>UAAUUG<br>UGGAUU<br>UUGU | TTTTTTTT<br>TT             | 8 |
| hsa-miR-520d-5p | 561  | 8:1:1 | -5.2  | -11.14 | 5.94 | CUACAA<br>AGGGAA<br>GCCUUU<br>UC    | TATTTGT<br>ATATAT          | 8 |
| hsa-miR-221     | 1124 | 8:1:1 | -7.5  | -13.46 | 5.96 | ACCUUG<br>CAUACA<br>AUGUAG<br>AUUU  | TATGTAG<br>TAATTAA<br>TTAT | 8 |
| hsa-miR-222     | 1124 | 8:1:1 | -7.5  | -13.46 | 5.96 | CUCAGU<br>AGCCAG<br>UGUAGA<br>UCCU  | TATGTAG<br>TAATT           | 8 |

|                |      |       |       |        |      |                                              |                             |   |
|----------------|------|-------|-------|--------|------|----------------------------------------------|-----------------------------|---|
| hsa-miR-548n   | 934  | 8:1:1 | -2.45 | -8.41  | 5.96 | CAAAAG<br>UAAUUG<br>UGGAUU<br>UUGU<br>UAGCUU | TTTTTTTT<br>TTT             | 8 |
| hsa-miR-21     | 1176 | 8:1:1 | -8.51 | -14.48 | 5.97 | AUCAGA<br>CUGAUG<br>UUGA<br>AUGUAU           | CATAAGT<br>TGTAATA          | 8 |
| hsa-miR-568    | 110  | 8:1:1 | -6.1  | -12.07 | 5.97 | AAAUGU<br>AUACAC<br>AC<br>CAUAAA             | TATATAT<br>ATTCATA<br>GTA   | 8 |
| hsa-miR-142-5p | 37   | 8:1:1 | -3.8  | -9.77  | 5.97 | GUAGAA<br>AGCACU<br>ACU<br>AACAUU            | TATTTTA<br>CTTGTTT<br>AT    | 8 |
| hsa-miR-181d   | 1166 | 8:1:0 | -6.5  | -12.48 | 5.98 | CAUUGU<br>UGUCGG<br>UGGGU<br>GAAGUU          | ATTAATG<br>TATCATA<br>AG    | 8 |
| hsa-miR-495    | 1089 | 8:1:0 | -5.7  | -11.68 | 5.98 | GCCCAU<br>GUUAUU<br>UUCG<br>UUCAAG           | TATTTGT<br>TTA              | 8 |
| hsa-miR-1297   | 494  | 8:0:1 | -7.6  | -13.59 | 5.99 | UAAUUC<br>AGGUG<br>AAAAGU<br>AAUUGC          | TTATTTG<br>ACACATT<br>T     | 8 |
| hsa-miR-548j   | 305  | 8:1:1 | 1.5   | -4.49  | 5.99 | GGUCUU<br>UGGU<br>AAAAGU<br>AAUCGC           | ATTTTTTT<br>TTCATTT<br>TA   | 8 |
| hsa-miR-548h   | 305  | 8:1:1 | 1.5   | -4.49  | 5.99 | GGUUUU<br>UGUC<br>UUUAUA                     | ATTTTTTT<br>TTCAT           | 8 |
| hsa-miR-340    | 480  | 8:1:1 | -8.06 | -14.07 | 6.01 | AGCAAU<br>GAGACU<br>GAUU<br>AGAUCA           | GTTTTAT<br>TTTGTG           | 8 |
| hsa-miR-383    | 1023 | 8:1:1 | -6.8  | -12.82 | 6.02 | GAAGGU<br>GAUUGU<br>GGCU<br>AGGUUG           | TTCTAAT<br>TACGTAT<br>AAAAT | 8 |
| hsa-miR-410    | 579  | 8:1:0 | -5.8  | -11.82 | 6.02 | UCUGUG<br>AUGAGU<br>UCG<br>UAUUGC            | TGTTTTA<br>TTTGTAT<br>A     | 8 |
| hsa-miR-32     | 97   | 8:1:1 | -3.63 | -9.65  | 6.02 | ACAUUA<br>CUAAGU<br>UGCA<br>GUGUUG           | TGTATAA<br>TATA             | 8 |
| hsa-miR-653    | 1204 | 8:1:1 | -2.1  | -8.13  | 6.03 | AAACAA<br>UCUCUA<br>CUG<br>UAUUGC            | TTTTAAG<br>AAATAT           | 8 |
| hsa-miR-32     | 253  | 8:1:1 | -5.7  | -11.73 | 6.03 | ACAUUA<br>CUAAGU<br>UGCA<br>AGGUUG           | TGTATAA<br>TATTTT           | 8 |
| hsa-miR-656    | 750  | 8:1:0 | -2.4  | -8.44  | 6.04 | CCUGUG<br>AGGUGU<br>UCA<br>CUAAUA            | TTTAATA<br>TAGTAA           | 8 |
| hsa-miR-633    | 726  | 8:1:1 | -1.5  | -7.54  | 6.04 | GUAUCU<br>ACCACA<br>AUAAA                    | TCTTATT<br>ATATATA<br>TATA  | 8 |

|                 |      |       |       |        |      |                                           |                             |   |
|-----------------|------|-------|-------|--------|------|-------------------------------------------|-----------------------------|---|
| hsa-miR-203     | 747  | 8:1:1 | -2.33 | -8.38  | 6.05 | AGUGGU<br>UCUJAA<br>CAGUUC<br>AACAGU<br>U | ATATTTA<br>ATAT             | 8 |
| hsa-miR-190     | 258  | 8:1:1 | -3.7  | -9.75  | 6.05 | UGAUAU<br>GUUUGA<br>UAUAAU<br>AGGU        | AATATTT<br>CTAAATA<br>T     | 8 |
| hsa-miR-583     | 1199 | 8:1:1 | -2.5  | -8.56  | 6.06 | CAAAGA<br>GGAAGG<br>UCCCAU<br>UAC         | TTCTATT<br>TTAAGA           | 8 |
| hsa-miR-548a-5p | 296  | 8:1:1 | -2    | -8.06  | 6.06 | AAAAGU<br>AAUUGC<br>GAGUUU<br>UACC        | AATATTT<br>TTAT             | 8 |
| hsa-miR-448     | 114  | 8:1:1 | -5    | -11.06 | 6.06 | UUGCAU<br>AUGUAG<br>GAUGUC<br>CCAU        | TATATTC<br>ATAGTAT<br>ATAT  | 8 |
| hsa-miR-590-3p  | 256  | 8:1:0 | -3.9  | -9.97  | 6.07 | UAAUUU<br>UAUGUA<br>UAAGCU<br>AGU         | ATAATAT<br>TTCT             | 8 |
| hsa-miR-380     | 255  | 8:1:1 | -4    | -10.07 | 6.07 | UGGUUG<br>ACCAUA<br>GAACAU<br>GCGC        | TATAATA<br>TTT              | 8 |
| hsa-miR-1322    | 1171 | 8:1:1 | -8.3  | -14.38 | 6.08 | GAUGAU<br>GCUGCU<br>GAUGCU<br>G           | TGTATCA<br>TAAGTTG<br>TAAAA | 8 |
| hsa-miR-200c    | 1085 | 8:1:1 | -6.6  | -12.68 | 6.08 | CGUCUU<br>ACCCAG<br>CAGUGU<br>UUGG        | GCGTTAT<br>TTG              | 8 |
| hsa-miR-944     | 543  | 8:1:1 | -4    | -10.12 | 6.12 | AAAUUA<br>UUGUAC<br>AUCGGA<br>UGAG        | TATTAAT<br>TTGTTTT<br>TG    | 8 |
| hsa-miR-1277    | 1027 | 8:1:1 | -5.6  | -11.76 | 6.16 | AAAUUA<br>AUUAU<br>AUAUGU<br>ACGUAU       | AATTACG<br>TATA             | 8 |
| hsa-miR-548k    | 296  | 8:1:1 | -1.9  | -8.06  | 6.16 | AAAAGU<br>ACUUGC<br>GGAUUU<br>UGCU        | AATATTT<br>TTATTTTT<br>TTTT | 8 |
| hsa-miR-548i    | 296  | 8:1:1 | -1.9  | -8.06  | 6.16 | AAAAGU<br>AAUUGC<br>GGAUUU<br>UGCC        | AATATTT<br>TTATTTTT<br>TT   | 8 |
| hsa-miR-1303    | 1021 | 8:1:1 | -6.7  | -12.88 | 6.18 | UUUAGA<br>GACGGG<br>GUCUUG<br>CUCU        | GCTTCTA<br>ATTACGT<br>ATA   | 8 |
| hsa-miR-548n    | 196  | 8:1:1 | -6.4  | -12.58 | 6.18 | CAAAG<br>UAAUUG<br>UGGAUU<br>UUGU         | TGGCTTT<br>TATATAA<br>TAT   | 8 |
| hsa-miR-548n    | 457  | 8:1:1 | -5.3  | -11.51 | 6.21 | CAAAG<br>UAAUUG<br>UGGAUU<br>UUGU         | TTATTTG<br>TATA             | 8 |
| hsa-miR-559     | 325  | 8:1:1 | -0.1  | -6.33  | 6.23 | UAAAGU<br>AAAUUA<br>GCACCA<br>AAA         | TTGATTT<br>TTTTTTTA<br>AA   | 8 |

|                 |      |       |       |        |      |                                     |                            |   |
|-----------------|------|-------|-------|--------|------|-------------------------------------|----------------------------|---|
| hsa-miR-877     | 1020 | 8:1:1 | -6.6  | -12.84 | 6.24 | GUAGAG<br>GAGAUG<br>GCGCAG<br>GG    | CGCTTCT<br>AATTACG<br>TATA | 8 |
| hsa-miR-183     | 684  | 8:1:1 | -7.9  | -14.14 | 6.24 | UAUGGC<br>ACUGGU<br>AGAAUU<br>CACU  | GGTTCCA<br>TATTAA          | 8 |
| hsa-miR-499-5p  | 478  | 8:1:1 | -4.79 | -11.03 | 6.24 | UUAAGA<br>CUUGCA<br>GUGAUG<br>UUU   | ATGTTTT<br>ATTTTGT<br>G    | 8 |
| hsa-miR-380     | 1027 | 8:1:1 | -5.5  | -11.76 | 6.26 | UGGUUG<br>ACCAUA<br>GAACAU<br>GCGC  | AATTACG<br>TAT             | 8 |
| hsa-miR-548c-5p | 985  | 8:1:1 | -3    | -9.26  | 6.26 | AAAAGU<br>AAUUGC<br>GGUUUU<br>UGCC  | ATTCTTT<br>TTAAGAA<br>AT   | 8 |
| hsa-miR-548d-5p | 985  | 8:1:1 | -3    | -9.26  | 6.26 | AAAAGU<br>AAUUGC<br>GGUUUU<br>UGCC  | ATTCTTT<br>TTAAGAA<br>AT   | 8 |
| hsa-miR-539     | 449  | 8:1:1 | -4.83 | -11.09 | 6.26 | GGAGAA<br>AUUAUC<br>CUUGGU<br>GUGU  | AATTTGT<br>TTTATTT<br>GTA  | 8 |
| hsa-miR-381     | 164  | 8:1:1 | -6.2  | -12.48 | 6.28 | AGCGAG<br>GUUGCC<br>CUUUGU<br>AUAU  | ATTTGTA<br>TATATAT<br>ATA  | 8 |
| hsa-miR-802     | 725  | 8:1:1 | -1.3  | -7.59  | 6.29 | CAGUAA<br>CAAAGA<br>UUCAUC<br>CUUGU | TTCTTAT<br>TATATAT         | 8 |
| hsa-miR-548n    | 935  | 8:1:1 | -2.41 | -8.71  | 6.3  | CAAAAG<br>UAAUUG<br>UGGAUU<br>UUGU  | TTTTTTTT<br>TTT            | 8 |
| hsa-miR-32      | 383  | 8:1:1 | -3    | -9.3   | 6.3  | UAUUGC<br>ACAUUA<br>CUAAGU<br>UGCA  | TGTATAA<br>TATAT           | 8 |
| hsa-miR-376b    | 912  | 8:1:1 | -5.2  | -11.51 | 6.31 | CGUGGA<br>UAUUCC<br>UUCUAU<br>GUUU  | TTATATG<br>ATAT            | 8 |
| hsa-miR-1185    | 86   | 8:1:1 | -5.1  | -11.41 | 6.31 | AGAGGA<br>UACCCU<br>UUGUAU<br>GUU   | GTATATT<br>CATTTGT         | 8 |
| hsa-miR-655     | 1153 | 8:1:0 | -8.6  | -14.92 | 6.32 | AGAGGU<br>UAUCCG<br>UGUUUAU<br>GUUC | ATGTAAT<br>AATAAA<br>ATTA  | 8 |
| hsa-miR-889     | 688  | 8:1:0 | -7.7  | -14.02 | 6.32 | AAUGGC<br>UGUCCG<br>UAGUAU<br>GGUC  | CCATATT<br>AAA             | 8 |
| hsa-miR-374b    | 98   | 8:1:0 | -4.8  | -11.15 | 6.35 | AUAUAA<br>UACAAC<br>CUGCUA<br>AGUG  | GTATAAT<br>ATAAATA<br>TA   | 8 |
| hsa-miR-217     | 1124 | 8:1:1 | -7.1  | -13.46 | 6.36 | UACUGC<br>AUCAGG<br>AACUGA<br>UUGGA | TATGTAG<br>TAATTAA<br>T    | 8 |

|                 |      |       |       |        |      |                                     |                            |   |
|-----------------|------|-------|-------|--------|------|-------------------------------------|----------------------------|---|
| hsa-miR-548k    | 672  | 8:1:1 | -5.3  | -11.67 | 6.37 | AAAAGU<br>ACUUGC<br>GGAUUU<br>UGCU  | AGTATAT<br>TATATGG<br>TT   | 8 |
| hsa-miR-26b     | 511  | 8:1:1 | -8.46 | -14.84 | 6.38 | UUCAAG<br>UAAUUC<br>AGGAUA<br>GGU   | TTATTTG<br>TATATAT<br>ATT  | 8 |
| hsa-miR-577     | 39   | 8:1:1 | -3.7  | -10.08 | 6.38 | UAGAUA<br>AAAUAU<br>UGGUAC<br>CUG   | TTTTACT<br>TGTTTAT<br>TTT  | 8 |
| hsa-miR-599     | 1256 | 8:1:1 | -4.7  | -11.11 | 6.41 | GUUGUG<br>UCAGUU<br>UAUCAA<br>AC    | TAACATA<br>AAACAA<br>TAGA  | 8 |
| hsa-miR-376a    | 912  | 8:1:1 | -5.1  | -11.51 | 6.41 | GUAGAU<br>UCUCCU<br>UCUAUG<br>AGUA  | TTATATG<br>ATATCCT<br>T    | 8 |
| hsa-miR-888     | 554  | 8:1:1 | -4    | -10.41 | 6.41 | UACUCA<br>AAAAGC<br>UGUCAG<br>UCA   | TTTTGGA<br>TAT             | 8 |
| hsa-miR-768-3p  | 1275 | 8:1:1 | -3.7  | -10.12 | 6.42 | UGCACC<br>AUGGUU<br>GUCUGA<br>GCAUG | GTATTAT<br>GTAATA<br>GT    | 8 |
| hsa-miR-520d-5p | 987  | 8:1:1 | -2.4  | -8.83  | 6.43 | CUACAA<br>AGGGAA<br>GCCCUU<br>UC    | TCTTTTT<br>AAGAAA<br>T     | 8 |
| hsa-miR-144     | 1076 | 8:1:0 | -4.7  | -11.15 | 6.45 | GGAUUA<br>CAUCAU<br>AUACUG<br>UAAG  | TATAATG<br>TCGCGTT<br>ATT  | 8 |
| hsa-miR-559     | 493  | 8:1:1 | -6.6  | -13.05 | 6.45 | UAAAGU<br>AAAUAU<br>GCACCA<br>AAA   | TTTATTT<br>GACACA<br>TTT   | 8 |
| hsa-miR-548c-5p | 296  | 8:1:1 | -1.6  | -8.06  | 6.46 | AAAAGU<br>AAUUGC<br>GGUUUU<br>UGCC  | AATATTT<br>TTATTTT<br>T    | 8 |
| hsa-miR-548j    | 296  | 8:1:1 | -1.6  | -8.06  | 6.46 | AAAAGU<br>AAUUGC<br>GGUCUU<br>UGGU  | AATATTT<br>TTATT           | 8 |
| hsa-miR-548h    | 296  | 8:1:1 | -1.6  | -8.06  | 6.46 | AAAAGU<br>AAUCGC<br>GGUUUU<br>UGUC  | AATATTT<br>TTA             | 8 |
| hsa-miR-584     | 1263 | 8:1:0 | -3    | -9.47  | 6.47 | UUAUGG<br>UUUGCC<br>UGGGAC<br>UGAG  | AAACAA<br>TAGAAT<br>GTATTA | 8 |
| hsa-miR-548k    | 1005 | 8:1:1 | -4.5  | -10.97 | 6.47 | AAAAGU<br>ACUUGC<br>GGAUUU<br>UGCU  | AGAATTT<br>TTTTTTA<br>A    | 8 |
| hsa-miR-300     | 513  | 8:1:1 | -7.3  | -13.77 | 6.47 | UAUACA<br>AGGGCA<br>GACUCU<br>CUCU  | ATTTGTA<br>TATATAT<br>TTT  | 8 |
| hsa-miR-137     | 1263 | 8:1:0 | -2.99 | -9.47  | 6.48 | UUAUUG<br>CUUAAG<br>AAUACG<br>CGUAG | AAACAA<br>TAGA             | 8 |

|                 |      |       |       |        |      |                                                            |   |
|-----------------|------|-------|-------|--------|------|------------------------------------------------------------|---|
| hsa-miR-590-3p  | 1040 | 8:1:0 | -4.12 | -10.6  | 6.48 | UAAUUU<br>UAUGUA ATAAAA<br>UAAGCU ATAAATG<br>AGU<br>AAAAGU | 8 |
| hsa-miR-548l    | 161  | 8:1:1 | -7.4  | -13.88 | 6.48 | AUUUGC AATATTT<br>GGUUU GTA<br>UGUC<br>AAAAGU              | 8 |
| hsa-miR-548l    | 1007 | 8:1:1 | -2.7  | -9.19  | 6.49 | AUUUGC AATTTTT<br>GGUUU TTTTA<br>UGUC<br>GUGGUU            | 8 |
| hsa-miR-487b    | 1100 | 8:1:1 | -4.8  | -11.3  | 6.5  | AUCCCU TGTATAA<br>GUCCUG TAA<br>UUCG<br>UUCAAG TTTTTTG     | 8 |
| hsa-miR-1297    | 286  | 8:1:1 | -3.4  | -9.92  | 6.52 | UAAUUC AGTAATA<br>AGGUG T<br>AAAAGU TATATTT                | 8 |
| hsa-miR-548l    | 522  | 8:1:1 | -8.3  | -14.84 | 6.54 | AUUUGC TGTTTGA<br>GGUUU ATTTT<br>UGUC<br>UCUUGU AATACA     | 8 |
| hsa-miR-581     | 1226 | 8:1:1 | -3.5  | -10.05 | 6.55 | GUUCUC CGTTATG<br>UAGAUC ATTA<br>AGU<br>CAUAAA TATTGTA     | 8 |
| hsa-miR-142-5p  | 1097 | 8:1:1 | -3.8  | -10.35 | 6.55 | GUAGAA TAATAAT<br>AGCACU AT<br>ACU<br>AAAAGU AATATTT       | 8 |
| hsa-miR-548b-5p | 296  | 8:1:1 | -1.5  | -8.06  | 6.56 | AAUUGU TTATTTTT<br>GGUUUU TTT<br>GGCC<br>AAAAGU AATATTT    | 8 |
| hsa-miR-548d-5p | 296  | 8:1:1 | -1.5  | -8.06  | 6.56 | AAUUGU TTATTTT<br>GGUUUU<br>UGCC<br>CUGGAG                 | 8 |
| hsa-miR-1270    | 114  | 8:1:1 | -4.5  | -11.06 | 6.56 | AUAUGG TATATTC<br>AAGAGC ATAGTA<br>UGUGU<br>UUACAG         | 8 |
| hsa-miR-582-5p  | 93   | 8:1:1 | -3.8  | -10.36 | 6.56 | UUGUUC CATTGT<br>AACCAG ATAATA<br>UUACU<br>UAGAUA          | 8 |
| hsa-miR-577     | 136  | 8:0:1 | -5.7  | -12.27 | 6.57 | AAAUAU TTTTATTT<br>UGGUAC TG<br>CUG<br>AGGUUG              | 8 |
| hsa-miR-656     | 854  | 8:1:0 | -1.3  | -7.88  | 6.58 | CCUGUG TATAAAA<br>AGGUGU TAGTAAC<br>UCA AATGT<br>GUGUUG    | 8 |
| hsa-miR-653     | 990  | 8:1:1 | -2    | -8.59  | 6.59 | AAACAA TTTTAAG<br>UCUCUA AAATATG<br>CUG<br>CAAAAG          | 8 |
| hsa-miR-548n    | 939  | 8:1:1 | -2.85 | -9.45  | 6.6  | JAAUUG TTTTTTTT<br>UGGAUU GTA<br>UUGU<br>AUCAAG            | 8 |
| hsa-miR-561     | 283  | 8:1:1 | -3.2  | -9.8   | 6.6  | GAUCUU TAATTTT<br>AAACUU TTGAGTA<br>UGCC AT                | 8 |

|                  |      |       |       |        |      |                                              |                             |   |
|------------------|------|-------|-------|--------|------|----------------------------------------------|-----------------------------|---|
| hsa-miR-548d-5p  | 137  | 8:1:1 | -5.8  | -12.41 | 6.61 | AAAAGU<br>AAUUGU<br>GGUUUU<br>UGCC           | TTTATTTT<br>GAT             | 8 |
| hsa-miR-186      | 1052 | 8:1:1 | -2.4  | -9.05  | 6.65 | CAAAGA<br>AUUCUC<br>CUUUUG<br>GGCU<br>UACUGC | GATTCCT<br>TGTTTTT<br>CCA   | 8 |
| hsa-miR-509-3-5p | 1124 | 8:1:1 | -6.8  | -13.46 | 6.66 | AGACGU<br>GGCAAU<br>CAUG<br>AAAAGU           | TATGTAG<br>TAATTAA          | 8 |
| hsa-miR-548b-5p  | 985  | 8:1:1 | -2.6  | -9.26  | 6.66 | AAUUGU<br>GGUUUU<br>GGCC<br>UCCCCG           | ATTCTTT<br>TTAAGA           | 8 |
| hsa-miR-1259     | 1070 | 8:1:1 | -2.79 | -9.46  | 6.67 | AGACCC<br>UUUAAC<br>CUGUGA<br>CAAAAG         | AGTATAT<br>ATA              | 8 |
| hsa-miR-548n     | 936  | 8:1:1 | -2.37 | -9.04  | 6.67 | UAAUUG<br>UGGAUU<br>UUGU<br>UUAUAA           | TTTTTTTT<br>TT              | 8 |
| hsa-miR-340      | 199  | 8:1:1 | -7.6  | -14.27 | 6.67 | AGCAAU<br>GAGACU<br>GAUU<br>UUAUGG           | CTTTTAT<br>ATAAT            | 8 |
| hsa-miR-584      | 28   | 8:1:1 | -2.13 | -8.8   | 6.67 | UUUGCC<br>UGGGAC<br>UGAG<br>AAAAGU           | AAAATAT<br>ATTA             | 8 |
| hsa-miR-548a-5p  | 282  | 8:1:1 | -3    | -9.69  | 6.69 | AAUUGC<br>GAGUUU<br>UACC<br>AUUAUA           | ATAATTT<br>TTT              | 8 |
| hsa-miR-374b     | 894  | 8:1:1 | -6.3  | -13    | 6.7  | UACAAC<br>CUGCUA<br>AGUG<br>GUCAUA           | GTATTGG<br>AATAAC<br>AA     | 8 |
| hsa-miR-485-3p   | 598  | 8:1:1 | -5.6  | -12.3  | 6.7  | CACGGC<br>UCUCCU<br>CUCU<br>GUGUUG           | GTATGTG<br>ATTAAAT          | 8 |
| hsa-miR-653      | 1063 | 8:1:1 | -2.1  | -8.82  | 6.72 | AAACAA<br>UCUCUA<br>CUG<br>UGGUUG            | TTTCCAT<br>AGTATAT<br>A     | 8 |
| hsa-miR-380      | 915  | 8:1:1 | -4.6  | -11.32 | 6.72 | ACCAUA<br>GAACAU<br>GCGC<br>CAUAAA           | TATGATA<br>TCCTTTT<br>TTTT  | 8 |
| hsa-miR-142-5p   | 538  | 8:1:1 | -3.8  | -10.52 | 6.72 | GUAGAA<br>AGCACU<br>ACU<br>AUGUAU            | TTTTTTAT<br>TAATTTG<br>TTTT | 8 |
| hsa-miR-568      | 1072 | 8:1:1 | -3.2  | -9.93  | 6.73 | AAAUGU<br>AUACAC<br>AC<br>AAAAGU             | TATATAT<br>AATGTC<br>GCGT   | 8 |
| hsa-miR-548k     | 35   | 8:1:1 | -1.7  | -8.44  | 6.74 | ACUUGC<br>GGUUUU<br>UGCU<br>UGUAGU           | ATTATTT<br>TACTTGT<br>TTATT | 8 |
| hsa-miR-142-3p   | 904  | 8:1:1 | -5.8  | -12.55 | 6.75 | GUUUCC<br>UACUUU<br>AUGGA                    | AACAAT<br>ATTT              | 8 |

|                 |      |       |       |        |      |                                              |                             |   |
|-----------------|------|-------|-------|--------|------|----------------------------------------------|-----------------------------|---|
| hsa-miR-450b-5p | 852  | 8:1:1 | -1.1  | -7.86  | 6.76 | UUUUGC<br>AAUAUG<br>UUCCUG<br>AAUA<br>AUGGAG | ATTATAA<br>AATAGTA<br>ACA   | 8 |
| hsa-miR-620     | 114  | 8:1:1 | -4.29 | -11.06 | 6.77 | AUAGAU<br>AUAGAA<br>AU<br>UACCCU             | TATATTC<br>ATAGTAT          | 8 |
| hsa-miR-10b     | 679  | 8:1:1 | -6.2  | -12.98 | 6.78 | GUAGAA<br>CCGAU<br>UUGUG<br>AGAGGU           | TATATGG<br>TTC              | 8 |
| hsa-miR-655     | 31   | 8:1:0 | -2.2  | -8.98  | 6.78 | UAUCCG<br>UGUUU<br>GUUC                      | ATATATT<br>ATTTTAC<br>TTGT  | 8 |
| hsa-miR-380     | 205  | 8:1:1 | -5.4  | -12.2  | 6.8  | UGGUUG<br>ACCAUA<br>GAACAU<br>GCGC<br>AGUGGU | TATAATA<br>TTGTAA<br>A      | 8 |
| hsa-miR-203     | 1247 | 8:1:1 | -2.3  | -9.11  | 6.81 | UCUUAA<br>CAGUUC<br>AACAGU<br>U              | ATATTTG<br>AATAAC<br>ATAA   | 8 |
| hsa-miR-570     | 452  | 8:1:1 | -4.3  | -11.11 | 6.81 | AAAGGU<br>AAUUGC<br>AGUUUU<br>UCCC           | TTGTTTT<br>ATTT             | 8 |
| hsa-miR-548c-5p | 1137 | 8:0:1 | -7.1  | -13.92 | 6.82 | AAAAGU<br>AAUUGC<br>GGUUUU<br>UGCC           | ATTATTT<br>TGTTACA<br>AC    | 8 |
| hsa-miR-548d-5p | 1137 | 8:0:1 | -7.1  | -13.92 | 6.82 | AAAAGU<br>AAUUGU<br>GGUUUU<br>UGCC           | ATTATTT<br>TGTTACA<br>ACATG | 8 |
| hsa-miR-630     | 707  | 8:1:1 | -5.6  | -12.44 | 6.84 | AGUAUU<br>CUGUAC<br>CAGGGA<br>AGGU           | TATAATA<br>CACTAA<br>AATATT | 8 |
| hsa-miR-548d-3p | 550  | 8:1:0 | -3    | -9.84  | 6.84 | CAAAAA<br>CCACAG<br>UUUCUU<br>UUGC           | TTGTTTT<br>TGGATAT<br>TTGT  | 8 |
| hsa-miR-203     | 503  | 8:1:0 | -6.1  | -12.96 | 6.86 | AGUGGU<br>UCUUAA<br>CAGUUC<br>AACAGU<br>U    | ACATTTG<br>ATTATTT<br>GTATA | 8 |
| hsa-miR-519a    | 90   | 8:1:1 | -4.57 | -11.43 | 6.86 | CUCUAG<br>AGGGAA<br>GCGCUU<br>UCUG           | ATTCATT<br>TGTATA           | 8 |
| hsa-miR-381     | 513  | 8:1:1 | -6.9  | -13.77 | 6.87 | AGCGAG<br>GUUGCC<br>CUUUGU<br>AUAU           | ATTTGTA<br>TATATAT<br>TTTGT | 8 |
| hsa-miR-144     | 679  | 8:1:1 | -6.1  | -12.98 | 6.88 | GGAUUU<br>CAUCAU<br>AUACUG<br>UAAG           | TATATGG<br>TTCCATA<br>TTAAA | 8 |
| hsa-miR-539     | 547  | 8:1:1 | -3    | -9.88  | 6.88 | GGAGAA<br>AUUAUC<br>CUUGGU<br>GUGU           | AATTTGT<br>TTTTGGA<br>TA    | 8 |

|                |      |       |       |        |      |                                             |                             |   |
|----------------|------|-------|-------|--------|------|---------------------------------------------|-----------------------------|---|
| hsa-miR-1267   | 606  | 8:1:1 | -4.1  | -10.99 | 6.89 | CCUGUU<br>GAAGUG<br>UAAUCC<br>CCA<br>UAGUAU | TAAATA<br>GAAAA             | 8 |
| hsa-miR-577    | 540  | 8:1:1 | -3.8  | -10.7  | 6.9  | AAAUAU<br>UGGUAC<br>CUG                     | TTTTATT<br>AATTTGT<br>TT    | 8 |
| hsa-miR-944    | 1048 | 8:1:1 | -2.9  | -9.82  | 6.92 | AAAUUA<br>UUGUAC<br>AUCGGA<br>UGAG          | AAATGAT<br>TCCTTGT<br>TTTT  | 8 |
| hsa-miR-487a   | 1274 | 8:1:0 | -3.1  | -10.03 | 6.93 | GUGGUU<br>AUCCCU<br>GCUGUG<br>UUCG          | TGTATTA<br>TGTAATA<br>GTA   | 8 |
| hsa-miR-494    | 577  | 8:1:1 | -4.9  | -11.83 | 6.93 | AGGUUG<br>UCCGUG<br>UUGUCU<br>UCUCU         | TTTGTTT<br>TATTTGT<br>ATAAT | 8 |
| hsa-miR-656    | 1076 | 8:0:1 | -4.2  | -11.15 | 6.95 | AGGUUG<br>CCUGUG<br>AGGUGU<br>UCA           | TATAATG<br>TCGCGTT<br>A     | 8 |
| hsa-miR-374b   | 589  | 8:1:0 | -4.8  | -11.78 | 6.98 | AUAUAA<br>UACAAC<br>CUGCUA<br>AGUG          | GTATAAT<br>ATGTATG<br>TGAT  | 8 |
| hsa-miR-487a   | 462  | 8:1:0 | -5.9  | -12.88 | 6.98 | GUGGUU<br>AUCCCU<br>GCUGUG<br>UUCG          | TGTATAA<br>TATATAT<br>A     | 8 |
| hsa-miR-488    | 197  | 8:1:1 | -5.7  | -12.69 | 6.99 | CCCAGA<br>UAAUGG<br>CACUCU<br>CAA           | GGCTTTT<br>ATATAA           | 8 |
| hsa-miR-524-5p | 149  | 8:1:1 | -4.2  | -11.19 | 6.99 | CUACAA<br>AGGGAA<br>GCACUU<br>UCUC          | TATTTGT<br>ATAA             | 8 |
| hsa-miR-656    | 915  | 8:0:1 | -4.3  | -11.32 | 7.02 | AGGUUG<br>CCUGUG<br>AGGUGU<br>UCA           | TATGATA<br>TCC              | 8 |
| hsa-miR-142-5p | 676  | 8:1:1 | -5    | -12.02 | 7.02 | CAUAAA<br>GUAGAA<br>AGCACU<br>ACU           | TATTATA<br>TGGTTCC          | 8 |
| hsa-miR-524-5p | 512  | 8:1:1 | -7.5  | -14.52 | 7.02 | CUACAA<br>AGGGAA<br>GCACUU<br>UCUC          | TATTTGT<br>ATATATA<br>TTTTG | 8 |
| hsa-miR-655    | 478  | 8:1:0 | -4    | -11.03 | 7.03 | AGAGGU<br>UAUCCG<br>UGUUAU<br>GUUC          | ATGTTTT<br>ATTTT            | 8 |
| hsa-miR-559    | 456  | 8:1:1 | -4.6  | -11.64 | 7.04 | UAAAGU<br>AAAUAU<br>GCACCA<br>AAA           | TTTATTT<br>GTATAAT<br>ATAT  | 8 |
| hsa-miR-191    | 985  | 8:1:1 | -2.2  | -9.26  | 7.06 | CAACGG<br>AAUCCG<br>AAAAGC<br>AGCUG         | ATTCTTT<br>TTA              | 8 |
| hsa-miR-1259   | 871  | 8:1:1 | -2.35 | -9.41  | 7.06 | UCCUG<br>AGACCC<br>UUUAAC<br>CUGUGA         | GTAATAT<br>ATC              | 8 |

|                 |      |       |       |        |      |                                    |                             |   |
|-----------------|------|-------|-------|--------|------|------------------------------------|-----------------------------|---|
| hsa-miR-499-5p  | 1179 | 8:1:1 | -7    | -14.07 | 7.07 | UUAAGA<br>CUUGCA<br>GUGAUG<br>UUU  | AAGTTGT<br>AAAAT            | 8 |
| hsa-miR-520d-5p | 584  | 8:1:1 | -5.7  | -12.77 | 7.07 | CUACAA<br>AGGGAA<br>GCCCUU<br>UC   | TATTTGT<br>ATAATAT<br>GTAT  | 8 |
| hsa-miR-520a-3p | 1004 | 8:1:1 | -3.8  | -10.89 | 7.09 | AAAGUG<br>CUUCCC<br>UUUGGA<br>CUGU | AAGAATT<br>TTTTTTTA<br>A    | 8 |
| hsa-miR-520d-5p | 149  | 8:1:1 | -4.1  | -11.19 | 7.09 | CUACAA<br>AGGGAA<br>GCCCUU<br>UC   | TATTTGT<br>ATAATAA<br>TA    | 8 |
| hsa-miR-548n    | 937  | 8:1:1 | -2.33 | -9.43  | 7.1  | CAAAAG<br>JAAUUG<br>UGGAUU<br>UUGU | TTTTTTTT<br>TTGTATT<br>C    | 8 |
| hsa-miR-361-5p  | 555  | 8:1:1 | -2.9  | -10.01 | 7.11 | UUAUCA<br>GAAUCU<br>CCAGGG<br>GUAC | TTTGGAT<br>ATTTGTA<br>TATAT | 8 |
| hsa-miR-559     | 137  | 8:0:1 | -5.3  | -12.41 | 7.11 | UAAAGU<br>AAAUAU<br>GCACCA<br>AAA  | TTTATTTT<br>GATATAT<br>TTGT | 8 |
| hsa-miR-410     | 453  | 8:1:0 | -4.05 | -11.18 | 7.13 | AGGUUG<br>UCUGUG<br>AUGAGU<br>UCG  | TGTTTTA<br>TTTGTAT<br>AATA  | 8 |
| hsa-miR-548b-5p | 544  | 8:1:0 | -3    | -10.14 | 7.14 | AAAAGU<br>AAUUGU<br>GGUUUU<br>GGCC | ATTAATT<br>TGTTTTT<br>GGATA | 8 |
| hsa-miR-548l    | 208  | 8:1:1 | -4.37 | -11.51 | 7.14 | AAAAGU<br>AUUUGC<br>GGUUUU<br>UGUC | AATATTT<br>GTAAAT           | 8 |
| hsa-miR-548l    | 1108 | 8:1:1 | -4.62 | -11.77 | 7.15 | AAAAGU<br>AUUUGC<br>GGUUUU<br>UGUC | AATATAT<br>TTATTA<br>A      | 8 |
| hsa-miR-429     | 33   | 8:1:1 | -1.15 | -8.33  | 7.18 | UAAUAC<br>UGUCUG<br>GUAAAA<br>CCGU | ATATTAT<br>TTTACTT<br>GTTTA | 8 |
| hsa-miR-302e    | 1004 | 8:1:1 | -3.7  | -10.89 | 7.19 | UAAGUG<br>CUUCCA<br>UGCUU          | AAGAATT<br>TTTTTTTA<br>A    | 8 |
| hsa-miR-548i    | 282  | 8:1:1 | -2.5  | -9.69  | 7.19 | AAAAGU<br>AAUUGC<br>GGUUUU<br>UGCC | ATAATTT<br>TTGAGT<br>AA     | 8 |
| hsa-miR-590-3p  | 1161 | 8:0:0 | -5.8  | -13    | 7.2  | UAAUUU<br>UAUGUA<br>UAAGCU<br>AGU  | ATAAAAT<br>TAAT             | 8 |
| hsa-miR-548n    | 283  | 8:1:1 | -2.6  | -9.8   | 7.2  | CAAAAG<br>JAAUUG<br>UGGAUU<br>UUGU | TAATTTT<br>TTGAGTA<br>A     | 8 |
| hsa-miR-548a-5p | 1137 | 8:0:1 | -6.71 | -13.92 | 7.21 | AAAAGU<br>AAUUGC<br>GAGUUU<br>UACC | ATTATTT<br>TGTTACA<br>AC    | 8 |

|                |      |       |       |        |      |                                       |                            |   |
|----------------|------|-------|-------|--------|------|---------------------------------------|----------------------------|---|
| hsa-miR-1259   | 218  | 8:1:1 | -4.09 | -11.3  | 7.21 | UCCCCUG<br>AGACCC<br>UUUAAC<br>CUGUGA | AATATAT<br>ATATATA         | 8 |
| hsa-miR-1259   | 201  | 8:1:1 | -6.3  | -13.52 | 7.22 | UCCCCUG<br>AGACCC<br>UUUAAC<br>CUGUGA | TTTATAT<br>AATATTT<br>GTAA | 8 |
| hsa-miR-656    | 729  | 8:1:0 | -0.7  | -7.94  | 7.24 | AGGUUG<br>CCUGUG<br>AGGUGU<br>UCA     | TATTATA<br>TATATAT<br>ATAT | 8 |
| hsa-miR-570    | 578  | 8:1:1 | -4.6  | -11.84 | 7.24 | AAAGGU<br>AAUUGC<br>AGUUUU<br>UCCC    | TTGTTTT<br>ATT             | 8 |
| hsa-miR-568    | 171  | 8:1:1 | -5.1  | -12.35 | 7.25 | AUGUAU<br>AAAUGU<br>AUACAC<br>AC      | TATATAT<br>ATATATA<br>ATTT | 8 |
| hsa-miR-380    | 1241 | 8:1:1 | -1.3  | -8.56  | 7.26 | UGGUUG<br>ACCAUA<br>GAACAU<br>GCGC    | TATAATA<br>TATTTGA         | 8 |
| hsa-miR-1259   | 605  | 8:1:1 | -4.6  | -11.86 | 7.26 | UCCCCUG<br>AGACCC<br>UUUAAC<br>CUGUGA | ATTAAAT<br>AGA             | 8 |
| hsa-miR-641    | 577  | 8:1:1 | -4.56 | -11.83 | 7.27 | AAAGAC<br>AUAGGA<br>UAGAGU<br>CACCUC  | TTTGTTT<br>TATTTGT<br>A    | 8 |
| hsa-miR-539    | 184  | 8:1:1 | -6.5  | -13.77 | 7.27 | GGAGAA<br>AUUAUC<br>CUUGGU<br>GUGU    | AATTTGT<br>TTTTTTG<br>GC   | 8 |
| hsa-miR-130a   | 38   | 8:1:1 | -2.7  | -9.97  | 7.27 | UUCACA<br>UUGUGC<br>UACUGU<br>CUGC    | ATTTTAC<br>TTGTTTA<br>TT   | 8 |
| hsa-miR-1246   | 29   | 8:1:1 | -1.7  | -8.97  | 7.27 | AAUGGA<br>UUUUUG<br>GAGCAG<br>G       | AAATATA<br>TTATT           | 8 |
| hsa-miR-570    | 924  | 8:1:1 | -1.39 | -8.67  | 7.28 | AAAGGU<br>AAUUGC<br>AGUUUU<br>UCCC    | CTTTTTTT<br>TTTTTTT        | 8 |
| hsa-miR-10a    | 679  | 8:1:1 | -5.7  | -12.98 | 7.28 | UACCCU<br>GUAGAU<br>CCGAU<br>UUGUG    | TATATGG<br>TTCCAT          | 8 |
| hsa-miR-26b    | 36   | 8:1:1 | -1.8  | -9.09  | 7.29 | UUCAAG<br>UAAUUC<br>AGGAUA<br>GGU     | TTATTTT<br>ACTTGTT<br>TATT | 8 |
| hsa-miR-1297   | 36   | 8:1:1 | -1.8  | -9.09  | 7.29 | UUCAAG<br>UAAUUC<br>AGGUG             | TTATTTT<br>ACTTGTT<br>TA   | 8 |
| hsa-miR-501-5p | 1047 | 8:1:1 | -2.61 | -9.91  | 7.3  | AAUCCU<br>UUGUCC<br>CUGGGU<br>GAGA    | TAAATGA<br>TTCCTTG         | 8 |
| hsa-miR-1279   | 591  | 8:1:1 | -4.4  | -11.7  | 7.3  | UCAUAU<br>UGCUUC<br>UUUCU             | ATAATAT<br>GTATGTG<br>ATTA | 8 |

|                 |      |       |       |        |      |                                              |                             |   |
|-----------------|------|-------|-------|--------|------|----------------------------------------------|-----------------------------|---|
| hsa-miR-548n    | 938  | 8:1:1 | -2.29 | -9.6   | 7.31 | CAAAAG<br>UAAUUG<br>UGGAUU<br>UUGU<br>GAAUGU | TTTTTTTT<br>TGTATTC         | 8 |
| hsa-miR-409-3p  | 905  | 8:1:1 | -4.9  | -12.21 | 7.31 | UGCUJG<br>GUGAAC<br>CCCU<br>UACUUG           | ACAATAT<br>TTATAT           | 8 |
| hsa-miR-890     | 1023 | 8:1:1 | -5.5  | -12.82 | 7.32 | GAAAGG<br>CAUCAG<br>UUG<br>UGGUUG            | TTCTAAT<br>TACGTAT<br>AA    | 8 |
| hsa-miR-380     | 590  | 8:1:1 | -4.39 | -11.72 | 7.33 | ACCAUA<br>GAACAU<br>GCGC<br>AAAAGU           | TATAATA<br>TGTAT            | 8 |
| hsa-miR-548h    | 510  | 8:1:1 | -7.6  | -14.93 | 7.33 | AAUCGC<br>GGUUUU<br>UGUC<br>UGACAA           | ATTATTT<br>GTATA            | 8 |
| hsa-miR-549     | 42   | 8:1:1 | -4.6  | -11.93 | 7.33 | CUAUGG<br>AUGAGC<br>UCU<br>AGGUUG            | TACTTGT<br>TTATTTTT         | 8 |
| hsa-miR-656     | 674  | 8:1:0 | -5.4  | -12.74 | 7.34 | CCUGUG<br>AGGUGU<br>UCA<br>AAAAGU            | TATATTA<br>TATGGTT<br>C     | 8 |
| hsa-miR-548d-5p | 544  | 8:1:0 | -2.8  | -10.14 | 7.34 | AAUUGU<br>GGUUUU<br>UGCC<br>UAAAGU           | ATTAATT<br>TGT              | 8 |
| hsa-miR-559     | 324  | 8:1:1 | 0     | -7.35  | 7.35 | AAAUAU<br>GCACCA<br>AAA<br>UGAUUU            | TTTGATT<br>TTTTTTT          | 8 |
| hsa-miR-190b    | 258  | 8:1:1 | -2.4  | -9.75  | 7.35 | GUUUGA<br>UAUUGG<br>GUU<br>GAUGGU            | AATATTT<br>CTAAATA<br>TATT  | 8 |
| hsa-miR-758     | 1144 | 8:1:1 | -6.6  | -13.96 | 7.36 | UGACCA<br>GAGAGC<br>ACAC<br>AUAUAA           | TGTTACA<br>ACATGTA          | 8 |
| hsa-miR-374b    | 670  | 8:1:0 | -3.7  | -11.06 | 7.36 | UACAAC<br>CUGCUA<br>AGUG<br>AAAAGU           | GTAGTAT<br>ATT              | 8 |
| hsa-miR-548b-5p | 137  | 8:1:1 | -5.02 | -12.41 | 7.39 | AAUUGU<br>GGUUUU<br>GGCC<br>GUGCAU           | TTTATTTT<br>GATAT           | 8 |
| hsa-miR-33a     | 1224 | 8:1:1 | -2    | -9.4   | 7.4  | UGUAGU<br>UGCAUU<br>GCA<br>UUCAAG            | ATAATAC<br>ACGT             | 8 |
| hsa-miR-26b     | 912  | 8:1:1 | -4.1  | -11.51 | 7.41 | UAAUUC<br>AGGAUA<br>GGU<br>UAGCAA            | TTATATG<br>ATA              | 8 |
| hsa-miR-548p    | 925  | 8:1:1 | -1.45 | -8.87  | 7.42 | AAACUG<br>CAGUUA<br>CUUU<br>CAAAGA           | TTTTTTTT<br>TTTTTTTT<br>TTT | 8 |
| hsa-miR-186     | 547  | 8:1:1 | -2.46 | -9.88  | 7.42 | AUUCUC<br>CUUUUG<br>GGCU                     | AATTTGT<br>TTTTGGA<br>TA    | 8 |

|                |      |       |       |        |      |                                                          |   |
|----------------|------|-------|-------|--------|------|----------------------------------------------------------|---|
| hsa-miR-656    | 1274 | 8:1:1 | -2.6  | -10.03 | 7.43 | AGGUUG<br>CCUGUG TGTATTA<br>AGGUGU TGTA<br>UCA<br>UAAAGU | 8 |
| hsa-miR-559    | 1200 | 8:1:1 | -1.8  | -9.23  | 7.43 | AAAUAU TCTATTT<br>GCACCA TAAG<br>AAA<br>AGGUGG           | 8 |
| hsa-miR-323-3p | 1076 | 8:1:0 | -3.7  | -11.15 | 7.45 | UCCGUG TATAATG<br>GCGCGU TCGC<br>UCGC<br>CAUAAA          | 8 |
| hsa-miR-142-5p | 748  | 8:1:1 | -1.2  | -8.65  | 7.45 | GUAGAA TATTTAA<br>AGCACU TATAGTA<br>ACU<br>AUGUAU        | 8 |
| hsa-miR-568    | 567  | 8:1:1 | -5.1  | -12.55 | 7.45 | AAAUGU TATATAT<br>AUACAC AAAT<br>AC<br>UAUUGC            | 8 |
| hsa-miR-32     | 153  | 8:1:1 | -2.83 | -10.28 | 7.45 | ACAUUA TGTATAA<br>CUAAGU TAATATT<br>UGCA TGT<br>UUAUAA   | 8 |
| hsa-miR-374a   | 670  | 8:1:0 | -3.6  | -11.06 | 7.46 | UACAAC GTAGTAT<br>CUGAUA ATTA<br>AGUG<br>AUGUAU          | 8 |
| hsa-miR-568    | 516  | 8:1:1 | -6.4  | -13.86 | 7.46 | AAAUGU TGTATAT<br>AUACAC ATAT<br>AC<br>UGAUUU            | 8 |
| hsa-miR-190    | 467  | 8:1:1 | -4.6  | -12.06 | 7.46 | GUUUGA AATATAT<br>UAUAUU ATATATG<br>AGGU TTTTA<br>CAAAGA | 8 |
| hsa-miR-186    | 535  | 8:0:1 | -6    | -13.47 | 7.47 | AUUCUC AATTTTT<br>CUUUUG TTATTAA<br>GGCU<br>CUUAUG       | 8 |
| hsa-miR-491-3p | 515  | 8:1:1 | -6.3  | -13.78 | 7.48 | CAAGAU TTGTATA<br>UCCCUU TATATT<br>CUAC<br>UCUAUA        | 8 |
| hsa-miR-1284   | 515  | 8:1:1 | -6.3  | -13.78 | 7.48 | CAGACC TTGTATA<br>CUGGCU TATATTT<br>UUUC TG<br>CAAAAG    | 8 |
| hsa-miR-548n   | 583  | 8:1:1 | -5.3  | -12.79 | 7.49 | UAAUUG TTATTTG<br>UGGAUU TATAAT<br>UUGU<br>CAAAAG        | 8 |
| hsa-miR-548e   | 451  | 8:1:1 | -3.63 | -11.12 | 7.49 | CAAUCG TTTGTTT<br>CGUUUU TATTTGT<br>UUGC<br>AUGUAU       | 8 |
| hsa-miR-568    | 143  | 8:1:1 | -4.87 | -12.38 | 7.51 | AAAUGU TTGATAT<br>AUACAC ATTTGTA<br>AC<br>CUUAUG         | 8 |
| hsa-miR-491-3p | 84   | 8:1:1 | -6.3  | -13.81 | 7.51 | CAAGAU TTGTATA<br>UCCCUU TTCATTT<br>CUAC GTA<br>UCUAUA   | 8 |
| hsa-miR-1284   | 84   | 8:1:1 | -6.3  | -13.81 | 7.51 | CAGACC TTGTATA<br>CUGGCU TTCATTT<br>UUUC GT              | 8 |

|              |      |       |       |        |      |                                     |                             |   |
|--------------|------|-------|-------|--------|------|-------------------------------------|-----------------------------|---|
| hsa-miR-181b | 596  | 8:1:0 | -4.4  | -11.93 | 7.53 | AACAUU<br>CAUUGC<br>UGUCGG<br>UGGGU | ATGTATG<br>TGATTAA<br>ATAG  | 8 |
| hsa-miR-144  | 1139 | 8:1:1 | -6    | -13.55 | 7.55 | GGAUUAU<br>CAUCAU<br>AUACUG<br>UAAG | TATTTTG<br>TTACAAC<br>A     | 8 |
| hsa-miR-656  | 1097 | 8:1:1 | -2.8  | -10.35 | 7.55 | AGGUUG<br>CCUGUG<br>AGGUGU<br>UCA   | TATTGTA<br>TAA              | 8 |
| hsa-miR-548i | 985  | 8:1:1 | -1.7  | -9.26  | 7.56 | AAAAGU<br>AAUUGC<br>GGAUUU<br>UGCC  | ATTCTTT<br>TTAAGAA<br>ATA   | 8 |
| hsa-miR-934  | 122  | 8:1:1 | -5.8  | -13.36 | 7.56 | UGUCUA<br>CUACUG<br>GAGACA<br>CUGG  | TAGTATA<br>TATATAT<br>T     | 8 |
| hsa-miR-494  | 245  | 8:1:1 | -4.3  | -11.87 | 7.57 | AGGUUG<br>UCCGUG<br>UUGUCU<br>UCUCU | TTTGTTT<br>TTGTATA<br>ATATT | 8 |
| hsa-miR-548n | 138  | 8:1:1 | -5.01 | -12.58 | 7.57 | CAAAAAG<br>UAAUUG<br>UGGAUU<br>UUGU | TTATTTT<br>GATATAT<br>T     | 8 |
| hsa-miR-633  | 1235 | 8:1:1 | -0.9  | -8.49  | 7.59 | CUAAUA<br>GUAUCU<br>ACCACA<br>AUAAA | TATGATT<br>ATAATAT          | 8 |
| hsa-miR-1297 | 912  | 8:1:1 | -3.9  | -11.51 | 7.61 | UUCAAG<br>UAAUUC<br>AGGUG           | TTATATG<br>ATATCCT<br>T     | 8 |
| hsa-miR-569  | 1115 | 8:1:1 | -4.7  | -12.32 | 7.62 | AGUUAA<br>UGAAUC<br>CUGGAA<br>AGU   | TTATTAA<br>AATATGT          | 8 |
| hsa-miR-548m | 476  | 8:1:1 | -4.3  | -11.92 | 7.62 | CAAAGG<br>UAUUUG<br>UGGUUU<br>UUG   | ATATGTT<br>TTATTT           | 8 |
| hsa-miR-656  | 158  | 8:1:0 | -4.7  | -12.32 | 7.62 | AGGUUG<br>CCUGUG<br>AGGUGU<br>UCA   | AATAATA<br>TTT              | 8 |
| hsa-miR-380  | 122  | 8:1:1 | -5.7  | -13.36 | 7.66 | UGGUUG<br>ACCAUA<br>GAACAU<br>GCGC  | TAGTATA<br>TATAT            | 8 |
| hsa-miR-93   | 1005 | 8:1:1 | -3.3  | -10.97 | 7.67 | CAAAGU<br>GCUGUU<br>CGUGCA<br>GGUAG | AGAATTT<br>TTTTTTA<br>ACGCT | 8 |
| hsa-miR-548p | 926  | 8:1:1 | -1.41 | -9.09  | 7.68 | UAGCAA<br>AAACUG<br>CAGUUA<br>CUUU  | TTTTTTTT<br>TTTT            | 8 |
| hsa-miR-186  | 770  | 8:1:1 | -0.62 | -8.3   | 7.68 | CAAAGA<br>AUUCUC<br>CUUUUG<br>GGCU  | AATGTTT<br>TCAACA<br>C      | 8 |
| hsa-miR-624  | 546  | 8:1:1 | -2.2  | -9.89  | 7.69 | UAGUAC<br>CAGUAC<br>CUUGUG<br>UUCA  | TAATTTG<br>TTTTT            | 8 |

|                 |      |       |       |        |      |                                            |                             |   |
|-----------------|------|-------|-------|--------|------|--------------------------------------------|-----------------------------|---|
| hsa-miR-568     | 169  | 8:1:1 | -4.5  | -12.19 | 7.69 | AUGUAU<br>AAAUGU<br>AUACAC<br>AC<br>UUUCCA | TATATAT<br>ATATATA<br>T     | 8 |
| hsa-miR-587     | 1278 | 8:1:1 | -3.1  | -10.8  | 7.7  | UAGGUG<br>AUGAGU<br>CAC<br>GGAUUAU         | TTATGTA<br>ATA              | 8 |
| hsa-miR-144     | 484  | 8:1:1 | -6.9  | -14.65 | 7.75 | CAUCAU<br>AUACUG<br>UAAG<br>AAAGAC         | TATTTTG<br>TGTTT            | 8 |
| hsa-miR-641     | 237  | 8:1:1 | -5.81 | -13.56 | 7.75 | AUAGGA<br>UAGAGU<br>CACCUC<br>ACCUUG       | TTTGTTT<br>TTTTGTT<br>TTTG  | 8 |
| hsa-miR-221     | 1169 | 8:1:0 | -5.6  | -13.38 | 7.78 | CAUACA<br>AUGUAG<br>AUUU<br>GUGGUU         | AATGTAT<br>CATA             | 8 |
| hsa-miR-487b    | 462  | 8:1:1 | -5.1  | -12.88 | 7.78 | AUCCCU<br>GUCCUG<br>UUCG<br>UAGUAU         | TGTATAA<br>TAT              | 8 |
| hsa-miR-577     | 415  | 8:1:1 | -1    | -8.78  | 7.78 | AAAUAU<br>UGGUAC<br>CUG<br>AGGUUG          | TTCTATT<br>TGACA            | 8 |
| hsa-miR-656     | 884  | 8:1:0 | -3.8  | -11.59 | 7.79 | CCUGUG<br>AGGUGU<br>UCA<br>AAAAGU          | TATAATA<br>ATTGTAT<br>TGGAA | 8 |
| hsa-miR-548i    | 1137 | 8:0:1 | -6.11 | -13.92 | 7.81 | AAUUGC<br>GGAUUU<br>UGCC<br>UACUCA         | ATTATTT<br>TGTTACA<br>ACAT  | 8 |
| hsa-miR-888     | 193  | 8:1:1 | -4    | -11.81 | 7.81 | AAAAGC<br>UGUCAG<br>UCA<br>UGUGCA          | TTTTGGC<br>TTTTATA<br>TA    | 8 |
| hsa-miR-19b     | 1249 | 8:1:1 | -3.1  | -10.97 | 7.87 | AAUCCA<br>UGCAA<br>ACUGA<br>UAAUUU         | ATTTGAA<br>TAACATA<br>A     | 8 |
| hsa-miR-590-3p  | 1268 | 8:1:1 | -3.7  | -11.58 | 7.88 | UAUGUA<br>UAAGCU<br>AGU<br>AUGUAU          | ATAGAAT<br>GTATTAT<br>GTAA  | 8 |
| hsa-miR-568     | 220  | 8:1:1 | -4.6  | -12.49 | 7.89 | AAAUGU<br>AUACAC<br>AC<br>AAUAAU           | TATATAT<br>ATATATA<br>T     | 8 |
| hsa-miR-369-3p  | 1100 | 8:1:0 | -3.4  | -11.3  | 7.9  | ACAUGG<br>UUGAUC<br>UUU<br>AAAAGU          | TGTATAA<br>TAATATA<br>T     | 8 |
| hsa-miR-548d-5p | 1008 | 8:1:1 | -2.9  | -10.8  | 7.9  | AAUUGU<br>GGUUUU<br>UGCC<br>UAAUAC         | ATTTTTTT<br>TT              | 8 |
| hsa-miR-429     | 121  | 8:1:1 | -5.8  | -13.71 | 7.91 | UGUCUG<br>GUAAAA<br>CCGU<br>AGGUUG         | ATAGTAT<br>ATATATA<br>T     | 8 |
| hsa-miR-656     | 32   | 8:1:0 | -1    | -8.91  | 7.91 | CCUGUG<br>AGGUGU<br>UCA                    | TATATTA<br>TTTTA            | 8 |

|                 |      |       |      |        |      |                                                                            |                                                       |   |
|-----------------|------|-------|------|--------|------|----------------------------------------------------------------------------|-------------------------------------------------------|---|
| hsa-miR-548b-5p | 1137 | 8:0:1 | -6   | -13.92 | 7.92 | AAAAGU<br>AAUUGU<br>GGUUUU<br>GGCC<br>UAGAU                                | ATTATTT<br>TGTTACA<br>ACAT                            | 8 |
| hsa-miR-577     | 929  | 8:1:1 | -1.2 | -9.13  | 7.93 | AAAUAU<br>UGGUAC<br>CUG<br>AGGUUG<br>UCUGUG<br>AUGAGU<br>UCG               | TTTTTTTT<br>TTT<br>TTTTGTA<br>TAATATT<br>T            | 8 |
| hsa-miR-410     | 250  | 8:1:1 | -4.2 | -12.13 | 7.93 | AAAAGU<br>AAUUGC<br>GAGUUU<br>UACC                                         | ATTAATT<br>TGTTTT                                     | 8 |
| hsa-miR-548a-5p | 544  | 8:1:0 | -2.2 | -10.14 | 7.94 | AAAAGU<br>AAUUGC<br>GGUUUU<br>UGCC                                         | ATTAATT<br>TGTTTT<br>G                                | 8 |
| hsa-miR-548c-5p | 544  | 8:1:0 | -2.2 | -10.14 | 7.94 | AAAAGU<br>AAUUGC<br>GGUUUU<br>UGCC<br>GAGCUU<br>AUUCAU<br>AAAAGU<br>GCAG   | ATTAATT<br>TGTTTT<br>G<br>AATAAAT<br>TCTTTTT<br>AAGAA | 8 |
| hsa-miR-590-5p  | 980  | 8:1:1 | -0.8 | -8.75  | 7.95 | UAAAAGU<br>AAAUAU<br>GCACCA<br>AAA                                         | TATATTT<br>TTATTTT<br>GATA                            | 8 |
| hsa-miR-559     | 131  | 8:1:1 | -5.1 | -13.05 | 7.95 | AAAAGU<br>AAUUGC<br>GAGUUU<br>UACC                                         | ATTCTTT<br>TTA                                        | 8 |
| hsa-miR-548a-5p | 985  | 8:1:1 | -1.3 | -9.26  | 7.96 | CAAAAG<br>CAAUCG<br>CGGUUU<br>UUGC                                         | TTTGTTT<br>TTGGATA                                    | 8 |
| hsa-miR-548e    | 549  | 8:1:1 | -1.9 | -9.87  | 7.97 | UGCAAC<br>UUACCU<br>GAGUCA<br>UUGA                                         | TAATTTG<br>TTTTTGG<br>ATATT                           | 8 |
| hsa-miR-891b    | 546  | 8:1:1 | -1.9 | -9.89  | 7.99 | ACUGGC<br>UAGGGA<br>AAAUGA<br>UUGGAU<br>UAAUAC<br>UGUCUG<br>GUAAAA<br>CCGU | AAATAA<br>ATTCTTT<br>ACAATAT<br>TTATATG<br>AT         | 8 |
| hsa-miR-664     | 979  | 8:1:0 | -1.1 | -9.1   | 8    | CAAAGA<br>AUUCUC<br>CUUUUG<br>GGCU                                         | GATTATT<br>TGTATA                                     | 8 |
| hsa-miR-429     | 905  | 8:1:0 | -4.2 | -12.21 | 8.01 | AAAUUA<br>UUGUAC<br>AUCGGA<br>UGAG                                         | TAATATT<br>TGTATAT<br>AT                              | 8 |
| hsa-miR-186     | 432  | 8:1:1 | 0.4  | -7.63  | 8.03 | AAAAGU<br>AAUUGC<br>GGUUUU<br>UGCC                                         | ATTAATT<br>TGTTTT<br>G                                | 8 |
| hsa-miR-944     | 160  | 8:1:1 | -5.5 | -13.53 | 8.03 | UAGAU<br>AAAUAU<br>UGGUAC<br>CUG<br>UAAUUU<br>UAUGUA<br>UAAGCU<br>AGU      | TAATATT<br>TGTATAT<br>AT<br>TTTTATTT<br>TGTGTTT       | 8 |
| hsa-miR-548i    | 544  | 8:1:0 | -2.1 | -10.14 | 8.04 | AAAAGU<br>AAUUGC<br>GGUUUU<br>UGCC                                         | ATTAATT<br>TGTTTT<br>G                                | 8 |
| hsa-miR-577     | 481  | 8:0:1 | -6.6 | -14.64 | 8.04 | UAGAU<br>AAAUAU<br>UGGUAC<br>CUG<br>UAAUUU<br>UAUGUA<br>UAAGCU<br>AGU      | TTTTATTT<br>TGTGTTT                                   | 8 |
| hsa-miR-590-3p  | 294  | 8:1:1 | -0.3 | -8.34  | 8.04 | UAGAU<br>AAAUAU<br>UGGUAC<br>CUG<br>UAAUUU<br>UAUGUA<br>UAAGCU<br>AGU      | GTAATAT<br>TTTTATT                                    | 8 |

|                 |      |       |       |        |      |                                                            |   |
|-----------------|------|-------|-------|--------|------|------------------------------------------------------------|---|
| hsa-miR-590-3p  | 180  | 8:1:0 | -6.2  | -14.24 | 8.04 | UAAUUU<br>UAUGUA ATATAAT<br>UAAGCU TTGTTT<br>AGU<br>UCUAUA | 8 |
| hsa-miR-1284    | 892  | 8:1:1 | -4.1  | -12.15 | 8.05 | CAGACC TTGTATT<br>CUGGCU GGAATA<br>UUUC<br>UAGAUA          | 8 |
| hsa-miR-577     | 324  | 8:1:1 | 0.7   | -7.35  | 8.05 | AAAUAU TTTGATT<br>UGGUAC TTT<br>CUG<br>UGGUUG              | 8 |
| hsa-miR-380     | 1144 | 8:1:1 | -5.9  | -13.96 | 8.06 | ACCAUA TGTTACA<br>GAACAU ACAT<br>GCGC<br>CUAAUA            | 8 |
| hsa-miR-633     | 540  | 8:1:1 | -2.64 | -10.7  | 8.06 | GUAUCU TTTTATT<br>ACCACA AATTTGT<br>AUAAA TT               | 8 |
| hsa-miR-190b    | 467  | 8:1:1 | -4    | -12.06 | 8.06 | UGAUUA AATATAT<br>GUUUGA ATATATG<br>UAUUGG TTT<br>GUU      | 8 |
| hsa-miR-374b    | 463  | 8:1:0 | -4.8  | -12.87 | 8.07 | AUAUAA<br>UACAAC GTATAAT<br>CUGCUA ATATATA<br>AGUG         | 8 |
| hsa-miR-561     | 447  | 8:1:1 | -3    | -11.08 | 8.08 | AUCAAG<br>GAUCUU TAAATTT<br>AAACUU GTTTTA<br>UGCC          | 8 |
| hsa-miR-1259    | 1174 | 8:1:1 | -6.4  | -14.49 | 8.09 | UCCCUG<br>AGACCC ATCATAA<br>UUUAAC GTTGT<br>CUGUGA         | 8 |
| hsa-miR-548i    | 536  | 8:1:1 | -3    | -11.1  | 8.1  | AAAAGU<br>AAUUGC ATTTTTTT<br>GGAUUU ATTAA<br>UGCC          | 8 |
| hsa-miR-144     | 674  | 8:1:1 | -4.6  | -12.74 | 8.14 | GGAUUA<br>CAUCAU TATATTA<br>AUACUG TATGGTT<br>UAAG         | 8 |
| hsa-miR-1246    | 88   | 8:1:1 | -3.3  | -11.46 | 8.16 | AAUGGA<br>UUUUUG ATATTCA<br>GAGCAG TTT<br>G                | 8 |
| hsa-miR-17      | 1005 | 8:1:1 | -2.8  | -10.97 | 8.17 | CAAAGU<br>GCUUAC AGAATTT<br>AGUGCA TTTTTTA<br>GGUAG ACGC   | 8 |
| hsa-miR-20a     | 1005 | 8:1:1 | -2.8  | -10.97 | 8.17 | UAAAGU<br>GCUUAU AGAATTT<br>AGUGCA TTTTTTA<br>GGUAG        | 8 |
| hsa-miR-106a    | 1005 | 8:1:1 | -2.8  | -10.97 | 8.17 | AAAAGU<br>GCUUAC AGAATTT<br>AGUGCA TTTTTT<br>GGUAG         | 8 |
| hsa-miR-548c-3p | 1005 | 8:1:0 | -2.8  | -10.97 | 8.17 | CAAAAA<br>UCUCAA AGAATTT<br>UUACUU TTTTTTA<br>UUGC AC      | 8 |
| hsa-miR-548e    | 245  | 8:1:1 | -3.7  | -11.87 | 8.17 | CAAAG<br>CAAUCG TTTGTTT<br>CGUUUU TTGTAT<br>UUGC           | 8 |

|                 |      |       |       |        |      |                                                                |                             |   |
|-----------------|------|-------|-------|--------|------|----------------------------------------------------------------|-----------------------------|---|
| hsa-miR-181b    | 1166 | 8:1:0 | -4.3  | -12.48 | 8.18 | AACAUU<br>CAUUGC<br>UGUCGG<br>UGGGU<br>UAGAUA                  | ATTAATG<br>TATCATA<br>A     | 8 |
| hsa-miR-577     | 928  | 8:1:1 | -1    | -9.18  | 8.18 | AAAUAU<br>UGGUAC<br>CUG<br>AGGUUG<br>CCUGUG<br>AGGUGU<br>UCA   | TTTTTTTT<br>TTTTT           | 8 |
| hsa-miR-656     | 707  | 8:1:0 | -4.26 | -12.44 | 8.18 | AGGUUG<br>CCUGUG<br>AGGUGU<br>UCA                              | TATAATA<br>CACTAA<br>AAT    | 8 |
| hsa-miR-548j    | 282  | 8:1:1 | -1.5  | -9.69  | 8.19 | AAAAGU<br>AAUUGC<br>GGUCUU<br>UGGU                             | ATAATTT<br>TTTGAGT<br>AA    | 8 |
| hsa-miR-664     | 1271 | 8:1:1 | -2.5  | -10.7  | 8.2  | ACUGGC<br>UAGGGA<br>AAAUGA<br>UUGGAU<br>CAAAAG                 | GAATGT<br>ATTATGT<br>AATA   | 8 |
| hsa-miR-548e    | 577  | 8:1:1 | -3.63 | -11.83 | 8.2  | CAAUCG<br>CGGUUU<br>UUGC<br>UCCCCG                             | TTTGTTT<br>TATTTG           | 8 |
| hsa-miR-1259    | 121  | 8:1:1 | -5.5  | -13.71 | 8.21 | AGACCC<br>UUUAAC<br>CUGUGA<br>CAUAAA                           | ATAGTAT<br>ATA              | 8 |
| hsa-miR-142-5p  | 32   | 8:1:1 | -0.7  | -8.91  | 8.21 | GUAGAA<br>AGCACU<br>ACU<br>AAAAGU                              | TATATTA<br>TTTT             | 8 |
| hsa-miR-548b-5p | 510  | 8:1:1 | -6.7  | -14.93 | 8.23 | AAUUGU<br>GGUUUU<br>GGCC<br>GAAGUU<br>GUUCGU<br>GGUGGA<br>UUCG | ATTATTT<br>GTATAT           | 8 |
| hsa-miR-382     | 904  | 8:1:1 | -4.3  | -12.55 | 8.25 | CUCCUA<br>UAUGAU<br>GCCUUU<br>CUUC                             | AACAAT<br>ATTTATA<br>T      | 8 |
| hsa-miR-337-3p  | 1125 | 8:1:1 | -5.3  | -13.57 | 8.27 | AGGUUG<br>CCUGUG<br>AGGUGU<br>UCA                              | ATGTAGT<br>AATTAAT<br>TA    | 8 |
| hsa-miR-656     | 1119 | 8:1:0 | -1.3  | -9.58  | 8.28 | AGGUUG<br>CCUGUG<br>AGGUGU<br>UCA                              | TAAAATA<br>TG TAG           | 8 |
| hsa-miR-380     | 872  | 8:1:1 | -2.3  | -10.58 | 8.28 | UGGUUG<br>ACCAUA<br>GAACAU<br>GCGC                             | TAATATA<br>TCA              | 8 |
| hsa-miR-487a    | 679  | 8:1:1 | -4.7  | -12.98 | 8.28 | GUGGUU<br>AUCCCU<br>GCUGUG<br>UUCG                             | TATATGG<br>TTCCATA<br>TTAAA | 8 |
| hsa-miR-26b     | 80   | 8:1:1 | -6.8  | -15.08 | 8.28 | UUCAAG<br>UAAUUC<br>AGGAUA<br>GGU                              | TTATTTG<br>TATATTC<br>A     | 8 |
| hsa-miR-429     | 206  | 8:1:1 | -4.3  | -12.59 | 8.29 | UAAUAC<br>UGUCUG<br>GUAAAA<br>CCGU                             | ATAATAT<br>TTGTAAA<br>TATAT | 8 |
| hsa-miR-548l    | 284  | 8:1:1 | -1.5  | -9.81  | 8.31 | AAAAGU<br>AUUUGC<br>GGUUUU<br>UGUC                             | AATTTTT<br>TGAG             | 8 |

|                 |      |       |       |        |      |                                     |                             |   |
|-----------------|------|-------|-------|--------|------|-------------------------------------|-----------------------------|---|
| hsa-miR-548j    | 1137 | 8:0:1 | -5.6  | -13.92 | 8.32 | AAAAGU<br>AAUUGC<br>GGUCUU<br>UGGU  | ATTATTT<br>TGTTACA<br>ACATG | 8 |
| hsa-miR-487a    | 599  | 8:1:1 | -4.1  | -12.43 | 8.33 | GUGGUU<br>AUCCCU<br>GCUGUG<br>UUCG  | TATGTGA<br>TTAAATA<br>GAAAA | 8 |
| hsa-miR-369-3p  | 253  | 8:1:0 | -3.4  | -11.73 | 8.33 | AAUAAU<br>ACAUGG<br>UUGAUC<br>UUU   | TGTATAA<br>TAT              | 8 |
| hsa-miR-410     | 144  | 8:1:0 | -3.4  | -11.75 | 8.35 | AGGUUG<br>UCUGUG<br>AUGAGU<br>UCG   | TGATATA<br>TTTGTA           | 8 |
| hsa-miR-369-3p  | 453  | 8:1:0 | -2.8  | -11.18 | 8.38 | AAUAAU<br>ACAUGG<br>UUGAUC<br>UUU   | TGTTTTA<br>TTTGAT<br>AATA   | 8 |
| hsa-miR-26a     | 80   | 8:1:1 | -6.7  | -15.08 | 8.38 | UUCAAG<br>UAAUCC<br>AGGAUA<br>GGCU  | TTATTTG<br>TATATTC<br>A     | 8 |
| hsa-miR-194     | 198  | 8:1:1 | -5.4  | -13.8  | 8.4  | UGUAAC<br>AGCAAC<br>UCCAUG<br>UGGA  | GCTTTTA<br>TATAATA          | 8 |
| hsa-miR-548l    | 907  | 8:1:1 | -3.6  | -12.02 | 8.42 | AAAAGU<br>AUUUGC<br>GGUUUU<br>UGUC  | AATATTT<br>ATATGAT<br>A     | 8 |
| hsa-miR-576-5p  | 895  | 8:1:1 | -4.5  | -12.92 | 8.42 | AUUCUA<br>AUUUUCU<br>CCACGU<br>CUUU | TATTGGA<br>ATAACA           | 8 |
| hsa-miR-539     | 575  | 8:1:1 | -3.21 | -11.63 | 8.42 | GGAGAA<br>AUUAUC<br>CUUGGU<br>GUGU  | AATTTGT<br>TTTATTT<br>GTATA | 8 |
| hsa-miR-491-3p  | 1251 | 8:1:0 | -2.4  | -10.83 | 8.43 | CUUAUG<br>CAAGAU<br>UCCCUU<br>CUAC  | TTGAATA<br>ACATAA           | 8 |
| hsa-miR-577     | 927  | 8:1:1 | -0.6  | -9.03  | 8.43 | UAGAUU<br>AAAUUU<br>UGGUAC<br>CUG   | TTTTTTTT<br>TTTT            | 8 |
| hsa-miR-495     | 491  | 8:1:0 | -5.3  | -13.75 | 8.45 | GAAGUU<br>GCCCAU<br>GUUAUU<br>UUCG  | TGTTTAT<br>TTG              | 8 |
| hsa-miR-548h    | 985  | 8:1:1 | -0.8  | -9.26  | 8.46 | AAAAGU<br>AAUCGC<br>GGUUUU<br>UGUC  | ATTCTTT<br>TTAAG            | 8 |
| hsa-miR-369-3p  | 588  | 8:1:0 | -3.4  | -11.87 | 8.47 | AAUAAU<br>ACAUGG<br>UUGAUC<br>UUU   | TGTATAA<br>TATGTAT<br>GTG   | 8 |
| hsa-miR-190     | 1150 | 8:1:1 | -7.5  | -15.99 | 8.49 | UGAUUU<br>GUUUGA<br>UAUAUU<br>AGGU  | AACATGT<br>AATA             | 8 |
| hsa-miR-548b-5p | 1008 | 8:1:1 | -2.3  | -10.8  | 8.5  | AAAAGU<br>AAUUGU<br>GGUUUU<br>GGCC  | ATTTTTTT<br>TTAACG          | 8 |

|                 |      |       |       |        |      |                                     |                             |   |
|-----------------|------|-------|-------|--------|------|-------------------------------------|-----------------------------|---|
| hsa-miR-577     | 931  | 8:1:1 | 0     | -8.52  | 8.52 | UAGAUU<br>AAAUU<br>UGGUAC<br>CUG    | TTTTTTTT<br>TT              | 8 |
| hsa-miR-559     | 195  | 8:1:1 | -4.02 | -12.54 | 8.52 | UAAAGU<br>AAAUU<br>GCACCA<br>AAA    | TTGGCTT<br>TTATATA<br>ATAT  | 8 |
| hsa-miR-548d-5p | 510  | 8:1:1 | -6.4  | -14.93 | 8.53 | AAAAGU<br>AAUUGU<br>GGUUUU<br>UGCC  | ATTATTT<br>GTATATA<br>TATT  | 8 |
| hsa-miR-590-3p  | 1184 | 8:1:1 | -3.6  | -12.15 | 8.55 | UAAUUU<br>UAUGUA<br>UAAGCU<br>AGU   | GTAAAAT<br>ACCATA<br>ACT    | 8 |
| hsa-miR-548n    | 1138 | 8:1:1 | -5.7  | -14.25 | 8.55 | CAAAA<br>UAAUUG<br>UGGAUU<br>UUGU   | TTATTTT<br>GTTACAA          | 8 |
| hsa-miR-374a    | 675  | 8:1:0 | -3.5  | -12.05 | 8.55 | UUUAAA<br>UACAAC<br>CUGAUA<br>AGUG  | ATATTAT<br>ATGGTTC<br>CA    | 8 |
| hsa-miR-429     | 256  | 8:1:1 | -1.4  | -9.97  | 8.57 | UAAUAC<br>UGUCUG<br>GUAAAA<br>CCGU  | ATAATAT<br>TTCTAA           | 8 |
| hsa-miR-568     | 125  | 8:1:1 | -4.75 | -13.33 | 8.58 | AUGUAU<br>AAUUGU<br>AUACAC<br>AC    | TATATAT<br>ATATTTT          | 8 |
| hsa-miR-944     | 207  | 8:1:1 | -3.5  | -12.09 | 8.59 | AAAUUA<br>UUGUAC<br>AUCGGA<br>UGAG  | TAATATT<br>TGTA             | 8 |
| hsa-miR-369-3p  | 1171 | 8:1:0 | -5.77 | -14.38 | 8.61 | AAUAAU<br>ACAUGG<br>UUGAUC<br>UUU   | TGTATCA<br>TAAGTTG          | 8 |
| hsa-miR-105     | 208  | 8:1:1 | -2.9  | -11.51 | 8.61 | UCAAUU<br>GCUCAG<br>ACUCCU<br>GUGGU | AATATTT<br>GTAAATA<br>TATA  | 8 |
| hsa-miR-380     | 99   | 8:1:1 | -3.3  | -11.92 | 8.62 | UGGUUG<br>ACCAUA<br>GAACAU<br>GCGC  | TATAATA<br>TAAATA           | 8 |
| hsa-miR-30a     | 134  | 8:1:1 | -2.71 | -11.34 | 8.63 | UGUAAA<br>CAUCCU<br>CGACUG<br>GAAG  | ATTTTTA<br>TTTTGAT<br>ATAT  | 8 |
| hsa-miR-30d     | 134  | 8:1:1 | -2.71 | -11.34 | 8.63 | UGUAAA<br>CAUCCC<br>CGACUG<br>GAAG  | ATTTTTA<br>TTTTGAT<br>AT    | 8 |
| hsa-miR-30e     | 134  | 8:1:1 | -2.71 | -11.34 | 8.63 | UGUAAA<br>CAUCCU<br>UGACUG<br>GAAG  | ATTTTTA<br>TTTTGAT<br>ATATT | 8 |
| hsa-miR-577     | 925  | 8:1:1 | -0.23 | -8.87  | 8.64 | UAGAUU<br>AAAUU<br>UGGUAC<br>CUG    | TTTTTTTT<br>TTTTTTTT<br>TT  | 8 |
| hsa-miR-548n    | 511  | 8:1:1 | -6.2  | -14.84 | 8.64 | CAAAA<br>UAAUUG<br>UGGAUU<br>UUGU   | TTATTTG<br>TATATAT<br>ATT   | 8 |

|                 |      |       |       |        |      |                                              |                             |   |
|-----------------|------|-------|-------|--------|------|----------------------------------------------|-----------------------------|---|
| hsa-miR-548c-3p | 558  | 8:1:1 | -2.8  | -11.45 | 8.65 | CAAAAA<br>UCUCAA<br>UUACUU<br>UUGC<br>GUGUUG | GGATATT<br>TGTATAT          | 8 |
| hsa-miR-653     | 1250 | 8:1:1 | -2.2  | -10.86 | 8.66 | AAACAA<br>UCUCUA<br>CUG<br>GAGCUU            | TTTGAAT<br>AACATA<br>AAA    | 8 |
| hsa-miR-590-5p  | 1176 | 8:1:1 | -5.8  | -14.48 | 8.68 | AUUCAU<br>AAAAGU<br>GCAG<br>UAGAUA           | CATAAGT<br>TGAAAA<br>TACCA  | 8 |
| hsa-miR-577     | 930  | 8:1:1 | -0.6  | -9.28  | 8.68 | AAAUAU<br>UGGUAC<br>CUG<br>AAUGGA            | TTTTTTTT<br>TTTTTTTT<br>T   | 8 |
| hsa-miR-1246    | 115  | 8:1:1 | -3.41 | -12.09 | 8.68 | UUUUUG<br>GAGCAG<br>G<br>CUUAUG              | ATATTCA<br>TAGTATA<br>TAT   | 8 |
| hsa-miR-491-3p  | 1182 | 8:1:1 | -3.5  | -12.19 | 8.69 | CAAGAU<br>UCCCUU<br>CUAC<br>UGAUAU           | TTGTAAA<br>ATAC             | 8 |
| hsa-miR-190b    | 1150 | 8:1:1 | -7.3  | -15.99 | 8.69 | GUUUGA<br>UAUUGG<br>GUU<br>AGAGGU            | AACATGT<br>AAT              | 8 |
| hsa-miR-655     | 1113 | 8:1:0 | -2.4  | -11.09 | 8.69 | UAUCCG<br>UGUUAU<br>GUUC<br>UAGAUA           | ATTTATT<br>AAAA             | 8 |
| hsa-miR-577     | 933  | 8:1:1 | 0.26  | -8.43  | 8.69 | AAAUAU<br>UGGUAC<br>CUG<br>UAGAUA            | TTTTTTTT<br>TTTTTTG<br>TA   | 8 |
| hsa-miR-577     | 932  | 8:1:1 | 0.21  | -8.48  | 8.69 | AAAUAU<br>UGGUAC<br>CUG<br>UUUUCA            | TTTTTTTT<br>TTTTTTT<br>GTAT | 8 |
| hsa-miR-1305    | 1180 | 8:1:0 | -5.1  | -13.8  | 8.7  | ACUCUA<br>AUGGGA<br>GAGA<br>AAUGGA           | AGTTGTA<br>AAATAC<br>CATAAC | 8 |
| hsa-miR-1246    | 217  | 8:1:1 | -2.69 | -11.39 | 8.7  | UUUUUG<br>GAGCAG<br>G<br>UAGAUA              | AAATATA<br>TATATAT<br>ATATA | 8 |
| hsa-miR-577     | 934  | 8:1:1 | 0.3   | -8.41  | 8.71 | AAAUAU<br>UGGUAC<br>CUG<br>AAAAGU            | TTTTTTTT<br>TTT             | 8 |
| hsa-miR-548j    | 510  | 8:1:1 | -6.2  | -14.93 | 8.73 | AAUUGC<br>GGUCUU<br>UGGU<br>CAAAGG           | ATTATTT<br>GTATA            | 8 |
| hsa-miR-548m    | 921  | 8:1:1 | -2.4  | -11.16 | 8.76 | UAUUUG<br>UGGUUU<br>UUG<br>AGAGGU            | ATCCTTT<br>TTTTTTTT<br>TT   | 8 |
| hsa-miR-655     | 1125 | 8:1:0 | -4.8  | -13.57 | 8.77 | UAUCCG<br>UGUUAU<br>GUUC<br>UAAUAC           | ATGTAGT<br>AATTAA           | 8 |
| hsa-miR-429     | 891  | 8:1:1 | -3    | -11.77 | 8.77 | UGUCUG<br>GUAAAA<br>CCGU                     | ATTGTAT<br>TGGAA            | 8 |

|                 |      |       |       |        |      |                                             |                             |   |
|-----------------|------|-------|-------|--------|------|---------------------------------------------|-----------------------------|---|
| hsa-miR-577     | 926  | 8:1:1 | -0.3  | -9.09  | 8.79 | UAGAUA<br>AAAUAU<br>UGGUAC<br>CUG<br>UGGUUG | TTTTTTTT<br>TTTTTTTT        | 8 |
| hsa-miR-380     | 466  | 8:1:1 | -3.3  | -12.09 | 8.79 | ACCAUA<br>GAACAU<br>GCGC<br>UUGUGU          | TAATATA<br>TATA             | 8 |
| hsa-miR-592     | 1143 | 8:1:1 | -4.9  | -13.71 | 8.81 | CAAUAU<br>GCGAUG<br>AUGU<br>UAGCAA          | TTGTTAC<br>AACATGT<br>AAT   | 8 |
| hsa-miR-548p    | 934  | 8:1:1 | 0.4   | -8.41  | 8.81 | AAACUG<br>CAGUUA<br>CUUU<br>AAAAGU          | TTTTTTTT<br>TTTTTGT         | 8 |
| hsa-miR-548c-5p | 137  | 8:1:1 | -3.6  | -12.41 | 8.81 | AAUUGC<br>GGUUUU<br>UGCC<br>UAGCAA          | TTTATTTT<br>GATATA          | 8 |
| hsa-miR-548p    | 933  | 8:1:1 | 0.4   | -8.43  | 8.83 | AAACUG<br>CAGUUA<br>CUUU<br>AUGUAU          | TTTTTTTT<br>TTTTT           | 8 |
| hsa-miR-568     | 518  | 8:1:1 | -5.5  | -14.33 | 8.83 | AAAUGU<br>AUACAC<br>AC<br>GAAGUU            | TATATAT<br>ATT              | 8 |
| hsa-miR-495     | 243  | 8:1:0 | -3    | -11.87 | 8.87 | GCCCAU<br>GUUAUU<br>UUCG<br>AUGUAU          | TTTTTGT<br>TTTTG            | 8 |
| hsa-miR-568     | 127  | 8:1:1 | -4.24 | -13.11 | 8.87 | AAAUGU<br>AUACAC<br>AC<br>UAGCAA            | TATATAT<br>ATTTTTA<br>TTTTG | 8 |
| hsa-miR-548p    | 932  | 8:1:1 | 0.4   | -8.48  | 8.88 | AAACUG<br>CAGUUA<br>CUUU<br>AAAAGU          | TTTTTTTT<br>TTTTTTT         | 8 |
| hsa-miR-548a-5p | 536  | 8:1:1 | -2.2  | -11.1  | 8.9  | AAUUGC<br>GAGUUU<br>UACC<br>UAGCAA          | ATTTTTTT<br>ATTAATT<br>TG   | 8 |
| hsa-miR-548p    | 931  | 8:1:1 | 0.4   | -8.52  | 8.92 | AAACUG<br>CAGUUA<br>CUUU<br>UAUUGC          | TTTTTTTT<br>TTT             | 8 |
| hsa-miR-32      | 462  | 8:1:1 | -3.95 | -12.88 | 8.93 | ACAUUA<br>CUAAGU<br>UGCA<br>CAAAAA          | TGTATAA<br>TATATAT<br>AT    | 8 |
| hsa-miR-548d-3p | 246  | 8:1:0 | -3    | -11.93 | 8.93 | CCACAG<br>UUUCUU<br>UUGC<br>CAAAGA          | TTGTTTT<br>TGTATAA          | 8 |
| hsa-miR-186     | 1008 | 8:1:1 | -1.86 | -10.8  | 8.94 | AUUCUC<br>CUUUUG<br>GGCU<br>UAGUAC          | ATTTTTTT<br>TTAACGC<br>TTCT | 8 |
| hsa-miR-624     | 234  | 8:1:1 | -3.3  | -12.24 | 8.94 | CAGUAC<br>CUUGUG<br>UUCA<br>AGGUUG          | TAATTTG<br>TTTTTTT          | 8 |
| hsa-miR-410     | 676  | 8:1:0 | -3.05 | -12.02 | 8.97 | UCUGUG<br>AUGAGU<br>UCG                     | TATTATA<br>TGGTCC<br>ATAT   | 8 |

|                 |      |       |       |        |      |                                              |                             |   |
|-----------------|------|-------|-------|--------|------|----------------------------------------------|-----------------------------|---|
| hsa-miR-548d-3p | 196  | 8:1:0 | -3.6  | -12.58 | 8.98 | CAAAAA<br>CCACAG<br>UUUCUU<br>UUGC<br>UAGAUA | TGGCTTT<br>TATATAA          | 8 |
| hsa-miR-577     | 78   | 8:0:1 | -6.6  | -15.59 | 8.99 | AAAUAU<br>UGGUAC<br>CUG<br>AAAAGU            | TTTTATTT<br>GTATATT         | 8 |
| hsa-miR-548a-5p | 1008 | 8:1:1 | -1.8  | -10.8  | 9    | AAUUGC<br>GAGUUU<br>UACC<br>UGGUUG           | ATTTTTTT<br>TTAAC           | 8 |
| hsa-miR-380     | 464  | 8:1:1 | -3.71 | -12.71 | 9    | ACCAUA<br>GAACAU<br>GCGC<br>AAAAGU           | TATAATA<br>TAT              | 8 |
| hsa-miR-548i    | 137  | 8:1:1 | -3.4  | -12.41 | 9.01 | AAUUGC<br>GGUUUU<br>UGCC<br>AAUAAU           | TTTATTTT<br>GATATA          | 8 |
| hsa-miR-369-3p  | 579  | 8:1:0 | -2.8  | -11.82 | 9.02 | ACAUGG<br>UUGAUC<br>UUU<br>AAUAAU            | TGTTTTA<br>TTTGTA           | 8 |
| hsa-miR-369-3p  | 674  | 8:1:0 | -3.7  | -12.74 | 9.04 | ACAUGG<br>UUGAUC<br>UUU<br>CAUAAA            | TATATTA<br>TATGGTT<br>C     | 8 |
| hsa-miR-142-5p  | 546  | 8:1:1 | -0.85 | -9.89  | 9.04 | GUAGAA<br>AGCACU<br>ACU<br>GUUCA             | TAATTTG<br>TTTTTGG<br>ATA   | 8 |
| hsa-miR-607     | 529  | 8:1:1 | -6.7  | -15.74 | 9.04 | AUCCAG<br>AUCUAU<br>AAC<br>GUUGUG            | TGTTTGA<br>ATT              | 8 |
| hsa-miR-599     | 1144 | 8:1:1 | -4.9  | -13.96 | 9.06 | UCAGUU<br>UAUCAA<br>AC<br>UAGAUA             | TGTTACA<br>ACATGTA<br>ATA   | 8 |
| hsa-miR-577     | 935  | 8:1:1 | 0.35  | -8.71  | 9.06 | AAAUAU<br>UGGUAC<br>CUG<br>AAUAAU            | TTTTTTTT<br>TTTTGTA<br>TTCA | 8 |
| hsa-miR-369-3p  | 479  | 8:1:0 | -4.6  | -13.66 | 9.06 | ACAUGG<br>UUGAUC<br>UUU<br>CAGUAA            | TGTTTTA<br>TTTTGTG<br>TT    | 8 |
| hsa-miR-802     | 70   | 8:1:1 | -8.3  | -17.36 | 9.06 | CAAAGA<br>UUCAUC<br>CUUGU<br>AAACUA          | TTGTTAT<br>ATTTTAT<br>TTGTA | 8 |
| hsa-miR-606     | 1128 | 8:1:1 | -3.4  | -12.47 | 9.07 | CUGAAA<br>AUCAAA<br>GAU<br>UAGCAA            | TAGTAAT<br>TAATTA           | 8 |
| hsa-miR-548p    | 927  | 8:1:1 | 0.04  | -9.03  | 9.07 | AAACUG<br>CAGUUA<br>CUUU<br>AAAAGU           | TTTTTTTT<br>TTTTTT          | 8 |
| hsa-miR-548a-5p | 482  | 8:1:1 | -5.47 | -14.55 | 9.08 | AAUUGC<br>GAGUUU<br>UACC<br>AAAAGU           | TTTATTTT<br>GT              | 8 |
| hsa-miR-548c-5p | 282  | 8:1:1 | -0.6  | -9.69  | 9.09 | AAUUGC<br>GGUUUU<br>UGCC                     | ATAATTT<br>TTT              | 8 |

|                |      |       |       |        |      |                                                               |                             |   |
|----------------|------|-------|-------|--------|------|---------------------------------------------------------------|-----------------------------|---|
| hsa-miR-548h   | 282  | 8:1:1 | -0.6  | -9.69  | 9.09 | AAAAGU<br>AAUCGC<br>GGUUUU<br>UGUC<br>UAGCAA                  | ATAATTT<br>TTTG             | 8 |
| hsa-miR-548p   | 935  | 8:1:1 | 0.4   | -8.71  | 9.11 | AAACUG<br>CAGUUA<br>CUUU<br>UCUUGU<br>GUUCUC<br>UAGAUC<br>AGU | TTTTTTTT<br>TTTTGTA<br>T    | 8 |
| hsa-miR-581    | 695  | 8:1:1 | -4.27 | -13.38 | 9.11 | GGAUUAU<br>CAUCAU<br>AUACUG<br>UAAG                           | AAAATA<br>AGCTAAT<br>ATAATA | 8 |
| hsa-miR-144    | 524  | 8:1:1 | -7    | -16.11 | 9.11 | CAAGUC<br>UUUUUU<br>GAGCAC<br>CUGUU                           | TATTTTG<br>TTTGAAT<br>TTTT  | 8 |
| hsa-miR-1264   | 1017 | 8:1:1 | -2.1  | -11.27 | 9.17 | AAAAGU<br>AAUUGC<br>GGUUUU<br>UGCC                            | TAACGCT<br>TCTAATT<br>ACG   | 8 |
| hsa-miR-548i   | 482  | 8:1:1 | -5.37 | -14.55 | 9.18 | AGAGGU<br>UGCCCU<br>UGGUGA<br>AUUC<br>UGCAAA                  | TTTATTTT<br>GTGTTTA<br>TT   | 8 |
| hsa-miR-377    | 528  | 8:1:0 | -6.6  | -15.79 | 9.19 | AGUAAU<br>CACAGU<br>UUUU                                      | TTGTTTG<br>AATTTTT          | 8 |
| hsa-miR-548f   | 282  | 8:1:1 | -0.5  | -9.69  | 9.19 | CAAAGA<br>AUUCUC<br>CUUUUG<br>GGCU                            | ATAATTT<br>TTTGAGT          | 8 |
| hsa-miR-186    | 536  | 8:1:1 | -1.9  | -11.1  | 9.2  | AGUAAU<br>CUGUAC<br>CAGGGA<br>AGGU                            | ATTTTTTT<br>ATTAATT<br>TG   | 8 |
| hsa-miR-630    | 1185 | 8:1:1 | -2.8  | -12.01 | 9.21 | AAACCU<br>GUGUUG<br>UUCAAG<br>AGUC                            | TAAAATA<br>CCAT             | 8 |
| hsa-miR-649    | 1176 | 8:1:1 | -5.25 | -14.48 | 9.23 | CAAAGG<br>UAUUUG<br>UGUUUU<br>UUG                             | CATAAGT<br>TGTAATA<br>TACCA | 8 |
| hsa-miR-548m   | 146  | 8:1:1 | -2.1  | -11.34 | 9.24 | UAGCAA<br>AAACUG<br>CAGUUA<br>CUUU                            | ATATATT<br>TGTATAA<br>T     | 8 |
| hsa-miR-548p   | 929  | 8:1:1 | 0.12  | -9.13  | 9.25 | UAGCAA<br>AAACUG<br>CAGUUA<br>CUUU                            | TTTTTTTT<br>TT              | 8 |
| hsa-miR-548p   | 928  | 8:1:1 | 0.08  | -9.18  | 9.26 | GGGAGC<br>CAGGAA<br>GUAUUG<br>AUGU                            | TTTTTTTT<br>TT              | 8 |
| hsa-miR-505    | 490  | 8:1:1 | -4.4  | -13.66 | 9.26 | AGUUAA<br>UGAAUC<br>CUGGAA<br>AGU                             | GTGTTTA<br>TTTGAC           | 8 |
| hsa-miR-569    | 1131 | 8:1:1 | -2.2  | -11.47 | 9.27 | CUACAA<br>AGGGAA<br>GCACUU<br>UCUC                            | TAATTAA<br>TTATTTT<br>GTTA  | 8 |
| hsa-miR-524-5p | 163  | 8:1:1 | -4.1  | -13.37 | 9.27 |                                                               | TATTTGT<br>ATATATA<br>TATAT | 8 |

|                 |      |       |       |        |      |                                            |                           |   |
|-----------------|------|-------|-------|--------|------|--------------------------------------------|---------------------------|---|
| hsa-miR-520d-5p | 163  | 8:1:1 | -4.1  | -13.37 | 9.27 | CUACAA<br>AGGGAA<br>GCCCUU<br>UC<br>UAAUUU | TATTTGT<br>ATATATA        | 8 |
| hsa-miR-590-3p  | 159  | 8:1:0 | -3.6  | -12.87 | 9.27 | UAUGUA<br>UAAGCU<br>AGU<br>AAAAGU          | ATAATAT<br>TTG            | 8 |
| hsa-miR-548c-5p | 1008 | 8:1:1 | -1.5  | -10.8  | 9.3  | AAUUGC<br>GGUUUU<br>UGCC<br>AAAAGU         | ATTTTTTT<br>TTAA          | 8 |
| hsa-miR-548i    | 1008 | 8:1:1 | -1.5  | -10.8  | 9.3  | AAUUGC<br>GGUUUU<br>UGCC<br>AAAAGU         | ATTTTTTT<br>TTAACGC<br>TT | 8 |
| hsa-miR-548a-5p | 137  | 8:1:1 | -3.1  | -12.41 | 9.31 | AAUUGC<br>GAGUUU<br>UACC<br>AGGUUG         | TTTATTTT<br>GATATA        | 8 |
| hsa-miR-494     | 74   | 8:1:1 | -5.1  | -14.41 | 9.31 | UCCGUG<br>UUGUCU<br>UCUCU<br>AAAAGU        | TATATTT<br>TATT           | 8 |
| hsa-miR-548l    | 74   | 8:1:1 | -5.1  | -14.41 | 9.31 | AUUUGC<br>GGGUUU<br>UGUC<br>AGGUUG         | TATATTT<br>TATTTGT<br>AT  | 8 |
| hsa-miR-656     | 877  | 8:1:0 | -0.9  | -10.23 | 9.33 | CCUGUG<br>AGGUGU<br>UCA<br>UCCCUG          | TATCATA<br>TATAAT         | 8 |
| hsa-miR-1259    | 100  | 8:1:0 | -2.8  | -12.13 | 9.33 | AGACCC<br>UUUAAC<br>CUGUGA<br>UUUCA        | ATAATAT<br>AAA            | 8 |
| hsa-miR-498     | 529  | 8:1:1 | -6.4  | -15.74 | 9.34 | GCCAGG<br>GGGCGU<br>UUUUC<br>UGGUUG        | TGTTTGA<br>ATTTTTTT       | 8 |
| hsa-miR-380     | 671  | 8:1:1 | -2    | -11.35 | 9.35 | ACCAUA<br>GAACAU<br>GCGC<br>UCCCUG         | TAGTATA<br>TTATATG<br>GT  | 8 |
| hsa-miR-1259    | 467  | 8:1:1 | -2.7  | -12.06 | 9.36 | AGACCC<br>UUUAAC<br>CUGUGA<br>UAGUA        | AATATAT<br>ATATATG<br>TTT | 8 |
| hsa-miR-577     | 939  | 8:1:1 | -0.08 | -9.45  | 9.37 | AAAUAU<br>UGGUAC<br>CUG<br>UAAUUG          | TTTTTTTT<br>GTATT         | 8 |
| hsa-miR-302f    | 1132 | 8:1:1 | -2.6  | -11.98 | 9.38 | CUUCCA<br>UGUUU<br>UAUACA                  | AATTAAT<br>TATT           | 8 |
| hsa-miR-300     | 82   | 8:1:1 | -6    | -15.38 | 9.38 | AGGGCA<br>GACUCU<br>CUCU<br>UCCCUG         | ATTTGTA<br>TATT           | 8 |
| hsa-miR-1259    | 591  | 8:1:1 | -2.3  | -11.7  | 9.4  | AGACCC<br>UUUAAC<br>CUGUGA<br>UAGUAC       | ATAATAT<br>GTATGTG<br>ATT | 8 |
| hsa-miR-1278    | 905  | 8:1:1 | -2.8  | -12.21 | 9.41 | UGUGCA<br>UAUCAU<br>CUAU                   | ACAATAT<br>TTATA          | 8 |

|                 |      |       |       |        |      |                                             |                             |   |
|-----------------|------|-------|-------|--------|------|---------------------------------------------|-----------------------------|---|
| hsa-miR-559     | 482  | 8:0:1 | -5.13 | -14.55 | 9.42 | UAAAGU<br>AAAUAU<br>GCACCA<br>AAA<br>UAGAUA | TTTATTTT<br>GTGTTT          | 8 |
| hsa-miR-577     | 936  | 8:1:1 | 0.39  | -9.04  | 9.43 | AAAUAU<br>UGGUAC<br>CUG<br>AAUAAU           | TTTTTTTT<br>TTTGTAT         | 8 |
| hsa-miR-369-3p  | 462  | 8:1:0 | -3.45 | -12.88 | 9.43 | ACAUGG<br>UUGAUC<br>UUU<br>CAUAAA           | TGTATAA<br>TATATA           | 8 |
| hsa-miR-142-5p  | 234  | 8:1:1 | -2.81 | -12.24 | 9.43 | GUAGAA<br>AGCACU<br>ACU<br>UAGCAA           | TAATTTG<br>TTTTTTT<br>GT    | 8 |
| hsa-miR-548p    | 936  | 8:1:1 | 0.4   | -9.04  | 9.44 | AAACUG<br>CAGUUA<br>CUUU<br>CAUAAA          | TTTTTTTT<br>TTTG            | 8 |
| hsa-miR-142-5p  | 76   | 8:0:1 | -5.7  | -15.15 | 9.45 | GUAGAA<br>AGCACU<br>ACU<br>AGGUUG           | TATTTTA<br>TTTGTAT          | 8 |
| hsa-miR-410     | 200  | 8:1:0 | -4.6  | -14.06 | 9.46 | UCUGUG<br>AUGAGU<br>UCG<br>UAUUGC           | TTTTATA<br>TAATATT<br>TGT   | 8 |
| hsa-miR-32      | 588  | 8:1:1 | -2.4  | -11.87 | 9.47 | ACAUUA<br>CUAAGU<br>UGCA<br>CAUCUU          | TGTATAA<br>TATGTAT          | 8 |
| hsa-miR-200b    | 1085 | 8:1:1 | -3.2  | -12.68 | 9.48 | ACUGGG<br>CAGCAU<br>UGGA<br>AAAGUG          | GCGTTAT<br>TTGTTTA<br>TTGT  | 8 |
| hsa-miR-519c-3p | 90   | 8:1:1 | -1.9  | -11.43 | 9.53 | CAUCUU<br>UUUAGA<br>GGAU<br>AAAGUG          | ATTCATT<br>TGTATA           | 8 |
| hsa-miR-519b-3p | 90   | 8:1:1 | -1.9  | -11.43 | 9.53 | CAUCCU<br>UUUAGA<br>GGUU<br>CUACAA          | ATTCATT<br>TGT              | 8 |
| hsa-miR-524-5p  | 81   | 8:1:1 | -5.8  | -15.33 | 9.53 | AGGGAA<br>GCACUU<br>UCUC<br>CUACAA          | TATTTGT<br>ATATTCA<br>TTTGT | 8 |
| hsa-miR-520d-5p | 81   | 8:1:1 | -5.8  | -15.33 | 9.53 | AGGGAA<br>GCCCUU<br>UC<br>UCCCUG            | TATTTGT<br>ATATTCA<br>TTTGT | 8 |
| hsa-miR-1259    | 465  | 8:1:0 | -2.6  | -12.15 | 9.55 | AGACCC<br>UUUAAC<br>CUGUGA<br>AGGUUG        | ATAATAT<br>ATATAT           | 8 |
| hsa-miR-656     | 142  | 8:1:1 | -2.5  | -12.05 | 9.55 | CCUGUG<br>AGGUGU<br>UCA<br>UAAAGU           | TTTGATA<br>TATTTGT<br>ATAA  | 8 |
| hsa-miR-106b    | 1005 | 8:1:1 | -1.4  | -10.97 | 9.57 | GCUGAC<br>AGUGCA<br>GAU<br>AAAAGU           | AGAATTT<br>TTTTTTA<br>ACGC  | 8 |
| hsa-miR-548b-5p | 282  | 8:1:1 | -0.1  | -9.69  | 9.59 | AAUUGU<br>GGUUUU<br>GGCC                    | ATAATTT<br>TTTGAGT<br>AA    | 8 |

|                 |      |       |      |        |      |                                                             |   |
|-----------------|------|-------|------|--------|------|-------------------------------------------------------------|---|
| hsa-miR-548d-5p | 282  | 8:1:1 | -0.1 | -9.69  | 9.59 | AAAAGU<br>AAUUGU ATAATTT<br>GGUUUU TTTGA                    | 8 |
| hsa-miR-548m    | 282  | 8:1:1 | -0.1 | -9.69  | 9.59 | UGCC<br>CAAAGG ATAATTT<br>UAUUUG TTTGAGT<br>UGUUUU A<br>UUG | 8 |
| hsa-miR-548j    | 1008 | 8:1:1 | -1.2 | -10.8  | 9.6  | AAAAGU<br>AAUUGC ATTTTTTT<br>GGUCUU TTAACGC<br>UGGU         | 8 |
| hsa-miR-641     | 186  | 8:1:1 | -4   | -13.61 | 9.61 | AAAGAC<br>AUAGGA TTTGTTT<br>UAGAGU TTTTGGC<br>CACCUC        | 8 |
| hsa-miR-548a-5p | 510  | 8:1:1 | -5.3 | -14.93 | 9.63 | AAAAGU<br>AAUUGC ATTATTT<br>GAGUUU GTA<br>UACC              | 8 |
| hsa-miR-548l    | 131  | 8:1:1 | -3.4 | -13.05 | 9.65 | AAAAGU<br>AUUUGC TATATTT<br>GGUUUU TTATT<br>UGUC            | 8 |
| hsa-miR-1259    | 108  | 8:1:1 | -2.7 | -12.36 | 9.66 | UCCCUG<br>AGACCC AATATAT<br>UUU AAC ATATTCA<br>CUGUGA TAGTA | 8 |
| hsa-miR-891a    | 1142 | 8:1:1 | -3.6 | -13.27 | 9.67 | UGCAAC<br>GAACCU TTTGTTA<br>GAGCCA CAACAT<br>CUGA GTA       | 8 |
| hsa-miR-34b     | 1128 | 8:1:0 | -2.8 | -12.47 | 9.67 | UAGGCA<br>GUGUCA TAGTAAT<br>UUAGCU TAATTAT<br>GAUUG TTTG    | 8 |
| hsa-miR-548p    | 930  | 8:1:1 | 0.4  | -9.28  | 9.68 | UAGCAA<br>AAACUG TTTTTTTT<br>CAGUUA TTTTTTTT<br>CUUU TG     | 8 |
| hsa-miR-548a-5p | 48   | 8:1:1 | -7.3 | -16.98 | 9.68 | AAAAGU<br>AAUUGC TTTATTTT<br>GAGUUU TTTTTTTT<br>UACC T      | 8 |
| hsa-miR-581     | 1174 | 8:1:1 | -4.8 | -14.49 | 9.69 | UCUUGU<br>GUUCUC ATCATAA<br>UAGAUC GTTGTA<br>AGU            | 8 |
| hsa-miR-433     | 1173 | 8:1:1 | -4.8 | -14.49 | 9.69 | UACGGU<br>GAGCCU TATCATA<br>GUCAUU AGTTGT<br>AUUC           | 8 |
| hsa-miR-1259    | 1150 | 8:1:1 | -6.3 | -15.99 | 9.69 | UCCCUG<br>AGACCC AACATGT<br>UUU AAC AAT<br>CUGUGA           | 8 |
| hsa-miR-577     | 492  | 8:1:1 | -3.7 | -13.39 | 9.69 | UAGAU<br>AAAUAU GTTTATT<br>UGGUAC TGACAC<br>CUG ATTTG       | 8 |
| hsa-miR-548j    | 137  | 8:1:1 | -2.7 | -12.41 | 9.71 | AAAAGU<br>AAUUGC TTTATTTT<br>GGUCUU GATA<br>UGGU            | 8 |
| hsa-miR-548h    | 137  | 8:1:1 | -2.7 | -12.41 | 9.71 | AAAAGU<br>AAUCGC TTTATTTT<br>GGUUUU GATATAT<br>UGUC T       | 8 |

|                |      |       |       |        |      |                                              |                             |   |
|----------------|------|-------|-------|--------|------|----------------------------------------------|-----------------------------|---|
| hsa-miR-142-5p | 674  | 8:1:1 | -3.01 | -12.74 | 9.73 | CAUAAA<br>GUAGAA<br>AGCACU<br>ACU<br>CAAAAAG | TATATTA<br>TATGGTT<br>CCATA | 8 |
| hsa-miR-548n   | 1009 | 8:1:1 | -3.2  | -12.96 | 9.76 | UAAUUG<br>UGGAUU<br>UUGU<br>CGGGUG           | TTTTTTTT<br>TAACG           | 8 |
| hsa-miR-363    | 1152 | 8:1:1 | -5.2  | -14.98 | 9.78 | GAUCAC<br>GAUGCA<br>AUUU<br>AGCGAG           | CATGTAA<br>TAATAA           | 8 |
| hsa-miR-381    | 82   | 8:1:1 | -5.6  | -15.38 | 9.78 | GUUGCC<br>CUUUGU<br>AUAU<br>AAAAGU           | ATTTGTA<br>TAT              | 8 |
| hsa-miR-548j   | 544  | 8:1:0 | -0.34 | -10.14 | 9.8  | AAUUGC<br>GGUCUU<br>UGGU<br>UAGCAA           | ATTAATT<br>TGTTTT<br>GGA    | 8 |
| hsa-miR-548p   | 937  | 8:1:1 | 0.4   | -9.43  | 9.83 | AAACUG<br>CAGUUA<br>CUUU<br>AUAUAA           | TTTTTTTT<br>TTGTATT<br>C    | 8 |
| hsa-miR-374b   | 1172 | 8:1:0 | -4.5  | -14.34 | 9.84 | UACAAC<br>CUGCUA<br>AGUG<br>AAAGAC           | GTATCAT<br>AAGTTGT          | 8 |
| hsa-miR-641    | 522  | 8:1:1 | -5    | -14.84 | 9.84 | AUAGGA<br>UAGAGU<br>CACCUC<br>CAAAGG         | TATATTT<br>TGTTTGA<br>AT    | 8 |
| hsa-miR-548m   | 1109 | 8:1:1 | -1.65 | -11.5  | 9.85 | UAUUUG<br>UGGUUU<br>UUG<br>UAGCAA            | ATATATT<br>TATTA<br>AT      | 8 |
| hsa-miR-548p   | 939  | 8:1:1 | 0.4   | -9.45  | 9.85 | AAACUG<br>CAGUUA<br>CUUU<br>GAAGUU           | TTTTTTTT<br>GTATTC          | 8 |
| hsa-miR-495    | 188  | 8:1:0 | -3.37 | -13.22 | 9.85 | GCCCAU<br>GUUAUU<br>UUCG<br>UGGUUG           | TGTTTT<br>TTG               | 8 |
| hsa-miR-380    | 200  | 8:1:1 | -4.2  | -14.06 | 9.86 | ACCAUA<br>GAACAU<br>GCGC<br>UGUAAA           | TTTTATA<br>TAATATT<br>TGTA  | 8 |
| hsa-miR-30a    | 45   | 8:1:1 | -4.8  | -14.66 | 9.86 | CAUCCU<br>CGACUG<br>GAAG<br>UGUAAA           | TTGTTTA<br>TTTTTTTT<br>TT   | 8 |
| hsa-miR-30c    | 45   | 8:1:1 | -4.8  | -14.66 | 9.86 | CAUCCU<br>ACACUC<br>UCAGC<br>UGUAAA          | TTGTTTA<br>TTTTTTTT<br>TTT  | 8 |
| hsa-miR-30d    | 45   | 8:1:1 | -4.8  | -14.66 | 9.86 | CAUCCC<br>CGACUG<br>GAAG<br>UGUAAA           | TTGTTTA<br>TTTTT            | 8 |
| hsa-miR-30b    | 45   | 8:1:1 | -4.8  | -14.66 | 9.86 | CAUCCU<br>ACACUC<br>AGCU<br>UGUAAA           | TTGTTTA<br>TTTTTTTT         | 8 |
| hsa-miR-30e    | 45   | 8:1:1 | -4.8  | -14.66 | 9.86 | CAUCCU<br>UGACUG<br>GAAG                     | TTGTTTA<br>TTTTTTTT<br>TTTT | 8 |

|                 |      |       |       |        |       |                                             |                             |   |
|-----------------|------|-------|-------|--------|-------|---------------------------------------------|-----------------------------|---|
| hsa-miR-577     | 937  | 8:1:1 | 0.44  | -9.43  | 9.87  | UAGAUA<br>AAAUAU<br>UGGUAC<br>CUG<br>AAUGAC | TTTTTTTT<br>TTGTATT<br>CAT  | 8 |
| hsa-miR-425     | 1171 | 8:1:1 | -4.5  | -14.38 | 9.88  | ACGAUC<br>ACUCCC<br>GUUGA<br>UGUAAA         | TGTATCA<br>TAAGT            | 8 |
| hsa-miR-30a     | 1111 | 8:1:1 | -1.01 | -10.89 | 9.88  | CAUCCU<br>CGACUG<br>GAAG                    | ATATTTA<br>TTAAAAT<br>ATG   | 8 |
| hsa-miR-944     | 1156 | 8:1:1 | -3.46 | -13.35 | 9.89  | AAAUUA<br>UUGUAC<br>AUCGGA<br>UGAG          | TAATAAT<br>AAAATT           | 8 |
| hsa-miR-548h    | 1008 | 8:1:1 | -0.9  | -10.8  | 9.9   | AAAAGU<br>AAUCGC<br>GGUUUU<br>UGUC          | ATTTTTTT<br>TTAACGC<br>TTC  | 8 |
| hsa-miR-548p    | 539  | 8:1:1 | -0.7  | -10.6  | 9.9   | UAGCAA<br>AAACUG<br>CAGUUA<br>CUUU          | TTTTTATT<br>AATTTG          | 8 |
| hsa-miR-1246    | 1164 | 8:1:1 | -2.8  | -12.71 | 9.91  | AAUGGA<br>UUUUUG<br>GAGCAG<br>G             | AAATTAA<br>TGTATCA<br>TA    | 8 |
| hsa-miR-559     | 934  | 8:1:1 | 1.5   | -8.41  | 9.91  | UAAAGU<br>AAAUAU<br>GCACCA<br>AAA           | TTTTTTTT<br>TTTT            | 8 |
| hsa-miR-559     | 933  | 8:1:1 | 1.5   | -8.43  | 9.93  | UAAAGU<br>AAAUAU<br>GCACCA<br>AAA           | TTTTTTTT<br>TTTTTTG         | 8 |
| hsa-miR-1264    | 160  | 8:1:1 | -3.6  | -13.53 | 9.93  | CAAGUC<br>UUUUUU<br>GAGCAC<br>CUGUU         | TAATATT<br>TGTA             | 8 |
| hsa-miR-374a    | 1172 | 8:1:0 | -4.4  | -14.34 | 9.94  | UUUAAA<br>UACAAC<br>CUGAUA<br>AGUG          | GTATCAT<br>AAGTTG           | 8 |
| hsa-miR-559     | 932  | 8:1:1 | 1.5   | -8.48  | 9.98  | UAAAGU<br>AAAUAU<br>GCACCA<br>AAA           | TTTTTTTT<br>TTTT            | 8 |
| hsa-miR-891b    | 234  | 8:1:1 | -2.25 | -12.24 | 9.99  | UGCAAC<br>UUACCU<br>GAGUCA<br>UUGA          | TAATTTG<br>TTTTTTT          | 8 |
| hsa-miR-491-3p  | 202  | 8:1:1 | -2.6  | -12.59 | 9.99  | CUUAUG<br>CAAGAU<br>UCCCUU<br>CUAC          | TTATATA<br>ATATT            | 8 |
| hsa-miR-656     | 1269 | 8:1:1 | -1.4  | -11.4  | 10    | AGGUUG<br>CCUGUG<br>AGGUGU<br>UCA           | TAGAAT<br>GTATTAT<br>GTAATA | 8 |
| hsa-miR-548p    | 938  | 8:1:1 | 0.4   | -9.6   | 10    | UAGCAA<br>AAACUG<br>CAGUUA<br>CUUU          | TTTTTTTT<br>TGTATT          | 8 |
| hsa-miR-548c-3p | 1006 | 8:1:1 | -0.4  | -10.41 | 10.01 | CAAAAA<br>UCUCAA<br>UUACUU<br>UUGC          | GAATTTT<br>TTTTTAA<br>CGC   | 8 |

|                 |      |       |       |        |       |                                               |                             |   |
|-----------------|------|-------|-------|--------|-------|-----------------------------------------------|-----------------------------|---|
| hsa-miR-802     | 238  | 8:1:1 | -3.3  | -13.31 | 10.01 | CAGUAA<br>CAAAGA<br>UUCAUC<br>CUUGU<br>UAAAGU | TTGTTTT<br>TTGTTTT          | 8 |
| hsa-miR-559     | 931  | 8:1:1 | 1.5   | -8.52  | 10.02 | AAAUAU<br>GCACCA<br>AAA<br>UGCAAA             | TTTTTTTT<br>TTTTTTTT<br>GTA | 8 |
| hsa-miR-548f    | 132  | 8:1:1 | -2.8  | -12.84 | 10.04 | AGUAAU<br>CACAGU<br>UUUU<br>AGGUUG            | ATATTTT<br>TATT             | 8 |
| hsa-miR-656     | 120  | 8:1:1 | -3.7  | -13.74 | 10.04 | CCUGUG<br>AGGUGU<br>UCA<br>UGAGUA             | CATAGTA<br>TAT              | 8 |
| hsa-miR-496     | 886  | 8:1:1 | -2    | -12.06 | 10.06 | UUACAU<br>GGCCAA<br>UCUC<br>UUUUUG            | TAATAAT<br>TGTAT            | 8 |
| hsa-miR-137     | 1153 | 8:1:1 | -4.85 | -14.92 | 10.07 | CUUAAG<br>AAUACG<br>CGUAG<br>UAGAUA           | ATGTAAT<br>AATAAAA<br>A     | 8 |
| hsa-miR-577     | 938  | 8:1:1 | 0.48  | -9.6   | 10.08 | AAAUAU<br>UGGUAC<br>CUG<br>UAGUAC             | TTTTTTTT<br>TGTATT          | 8 |
| hsa-miR-624     | 183  | 8:1:1 | -3.6  | -13.7  | 10.1  | CAGUAC<br>CUUGUG<br>UUCA<br>AAAAGU            | TAATTTG<br>TTTTTTT<br>GGCT  | 8 |
| hsa-miR-548l    | 1137 | 8:1:1 | -3.8  | -13.92 | 10.12 | AUUUUG<br>GGGUUU<br>UGUC<br>UCCUG             | ATTATTT<br>TGTTACA          | 8 |
| hsa-miR-1259    | 1106 | 8:1:0 | -2.96 | -13.08 | 10.12 | AGACCC<br>UUUAAC<br>CUGUGA<br>AGGUUG          | ATAATAT<br>ATTTAT           | 8 |
| hsa-miR-494     | 237  | 8:1:1 | -3.4  | -13.56 | 10.16 | UCCGUG<br>UUGUCU<br>UCUCU<br>UAAAGU           | TTTGTTT<br>TTTTGT           | 8 |
| hsa-miR-559     | 935  | 8:1:1 | 1.5   | -8.71  | 10.21 | AAAUAU<br>GCACCA<br>AAA<br>AGGUUG             | TTTTTTTT<br>TTTTGTA<br>TTCA | 8 |
| hsa-miR-494     | 186  | 8:1:1 | -3.4  | -13.61 | 10.21 | UCCGUG<br>UUGUCU<br>UCUCU<br>CAAAAA           | TTTGTTT<br>TTTTGGC<br>TTT   | 8 |
| hsa-miR-548c-3p | 132  | 8:1:0 | -2.62 | -12.84 | 10.22 | UCUCAA<br>UUACUU<br>UUGC<br>UAGAUA            | ATATTTT<br>TATTT            | 8 |
| hsa-miR-577     | 250  | 8:1:1 | -1.9  | -12.13 | 10.23 | AAAUAU<br>UGGUAC<br>CUG<br>UAGCAA             | TTTTGTA<br>TAATATT<br>T     | 8 |
| hsa-miR-548p    | 135  | 8:1:1 | -1.26 | -11.52 | 10.26 | AAACUG<br>CAGUUA<br>CUUU<br>ACUGGC            | TTTTTATT<br>TTGA            | 8 |
| hsa-miR-664     | 1044 | 8:1:0 | 0     | -10.27 | 10.27 | UAGGGA<br>AAAUGA<br>UUGGAU                    | AAATAA<br>ATGAT             | 8 |

|                 |      |       |       |        |       |                                              |                             |   |
|-----------------|------|-------|-------|--------|-------|----------------------------------------------|-----------------------------|---|
| hsa-miR-186     | 575  | 8:1:1 | -1.36 | -11.63 | 10.27 | CAAAGA<br>AUUCUC<br>CUUUUG<br>GGCU<br>CUACAA | AATTTGT<br>TTTATTT<br>GTAT  | 8 |
| hsa-miR-524-5p  | 199  | 8:1:1 | -4    | -14.27 | 10.27 | AGGGAA<br>GCACUU<br>UCUC                     | CTTTTAT<br>ATAAT            | 8 |
| hsa-miR-548c-5p | 536  | 8:1:1 | -0.8  | -11.1  | 10.3  | AAAAGU<br>AAUUGC<br>GGUUUU<br>UGCC           | ATTTTTTT<br>ATTAATT<br>TGT  | 8 |
| hsa-miR-548j    | 536  | 8:1:1 | -0.8  | -11.1  | 10.3  | AAAAGU<br>AAUUGC<br>GGUCUU<br>UGGU           | ATTTTTTT<br>ATTAATT<br>TGT  | 8 |
| hsa-miR-655     | 1170 | 8:1:0 | -4.1  | -14.42 | 10.32 | AGAGGU<br>UAUCCG<br>UGUUAU<br>GUUC           | ATGTATC<br>ATAAGTT<br>G     | 8 |
| hsa-miR-1302    | 1170 | 8:1:1 | -4.1  | -14.42 | 10.32 | UUGGGA<br>CAUACU<br>UAUGCU<br>AAA            | ATGTATC<br>ATAAGTT<br>G     | 8 |
| hsa-miR-559     | 1137 | 8:1:1 | -3.6  | -13.92 | 10.32 | UAAAAGU<br>AAAUAU<br>GCACCA<br>AAA           | ATTATTT<br>TGT              | 8 |
| hsa-miR-559     | 925  | 8:1:1 | 1.45  | -8.87  | 10.32 | UAAAAGU<br>AAAUAU<br>GCACCA<br>AAA           | TTTTTTTT<br>TTT             | 8 |
| hsa-miR-494     | 681  | 8:1:0 | -3.7  | -14.02 | 10.32 | AGGUUG<br>UCCGUG<br>UUGUCU<br>UCUCU          | TATGGTT<br>CCAT             | 8 |
| hsa-miR-559     | 939  | 8:1:1 | 0.9   | -9.45  | 10.35 | UAAAAGU<br>AAAUAU<br>GCACCA<br>AAA           | TTTTTTTT<br>GTAT            | 8 |
| hsa-miR-181a    | 532  | 8:1:0 | -5.46 | -15.81 | 10.35 | AACAUU<br>CAACGC<br>UGUCGG<br>UGAGU          | TTGAATT<br>TTTTTATT<br>AA   | 8 |
| hsa-miR-548c-5p | 482  | 8:1:1 | -4.2  | -14.55 | 10.35 | AAAAGU<br>AAUUGC<br>GGUUUU<br>UGCC           | TTTATTTT<br>GTGTTTA         | 8 |
| hsa-miR-548j    | 482  | 8:1:1 | -4.2  | -14.55 | 10.35 | AAAAGU<br>AAUUGC<br>GGUCUU<br>UGGU           | TTTATTTT<br>GTGTTTA         | 8 |
| hsa-miR-30d     | 1111 | 8:1:1 | -0.51 | -10.89 | 10.38 | UGUAAA<br>CAUCCC<br>CGACUG<br>GAAG           | ATATTTA<br>TTAAAAT<br>ATGTA | 8 |
| hsa-miR-30c     | 1111 | 8:1:1 | -0.5  | -10.89 | 10.39 | UGUAAA<br>CAUCCU<br>ACACUC<br>UCAGC          | ATATTTA<br>TTAAA            | 8 |
| hsa-miR-30b     | 1111 | 8:1:1 | -0.5  | -10.89 | 10.39 | UGUAAA<br>CAUCCU<br>ACACUC<br>AGCU           | ATATTTA<br>TTAAAAT<br>ATGTA | 8 |
| hsa-miR-30e     | 1111 | 8:1:1 | -0.5  | -10.89 | 10.39 | UGUAAA<br>CAUCCU<br>UGACUG<br>GAAG           | ATATTTA<br>TTAAAAT<br>ATGTA | 8 |

|                 |      |       |       |        |       |                                             |                             |   |
|-----------------|------|-------|-------|--------|-------|---------------------------------------------|-----------------------------|---|
| hsa-miR-559     | 926  | 8:1:1 | 1.31  | -9.09  | 10.4  | UAAAGU<br>AAAUAU<br>GCACCA<br>AAA<br>UUAUCA | TTTTTTTT<br>TTTTTT          | 8 |
| hsa-miR-361-5p  | 1141 | 8:1:1 | -2.76 | -13.17 | 10.41 | GAAUCU<br>CCAGGG<br>GUAC<br>CUACAA          | TTTTGTT<br>ACAAC            | 8 |
| hsa-miR-520d-5p | 512  | 8:1:1 | -4.1  | -14.52 | 10.42 | AGGGAA<br>GCCCUU<br>UC<br>AGAGGU            | TATTTGT<br>ATAT             | 8 |
| hsa-miR-655     | 673  | 8:1:1 | -2    | -12.43 | 10.43 | UAUCCG<br>UGUUAU<br>GUUC<br>GAAGUU          | GTATATT<br>ATA              | 8 |
| hsa-miR-495     | 239  | 8:1:0 | -2.2  | -12.63 | 10.43 | GCCCAU<br>GUUAUU<br>UUCG<br>CAGUAA          | TGTTTT<br>TTGTTTT<br>TGTA   | 8 |
| hsa-miR-802     | 187  | 8:1:1 | -3.3  | -13.76 | 10.46 | CAAAGA<br>UUCAUC<br>CUUGU<br>CAAAGG         | TTGTTTT<br>TTTGGCT<br>TTT   | 8 |
| hsa-miR-548m    | 130  | 8:1:1 | -2.7  | -13.18 | 10.48 | UAUUUG<br>UGUUUU<br>UUG<br>AGGUUG           | ATATATT<br>TTTA             | 8 |
| hsa-miR-410     | 71   | 8:0:0 | -6.3  | -16.78 | 10.48 | UCUGUG<br>AUGAGU<br>UCG<br>AAAAGU           | TGTTATA<br>TTTTATT          | 8 |
| hsa-miR-548b-5p | 536  | 8:1:1 | -0.6  | -11.1  | 10.5  | AAUUGU<br>GGUUUU<br>GGCC<br>AAAAGU          | ATTTTTTT<br>ATTA            | 8 |
| hsa-miR-548d-5p | 536  | 8:1:1 | -0.6  | -11.1  | 10.5  | AAUUGU<br>GGUUUU<br>UGCC<br>AAAAGU          | ATTTTTTT<br>ATTAA           | 8 |
| hsa-miR-548k    | 1137 | 8:1:1 | -3.4  | -13.92 | 10.52 | ACUUGC<br>GGUUUU<br>UGCU<br>AAAAGU          | ATTATTT<br>TGTT             | 8 |
| hsa-miR-548h    | 1137 | 8:0:1 | -3.4  | -13.92 | 10.52 | AAUCGC<br>GGUUUU<br>UGUC<br>UAAAGU          | ATTATTT<br>TGT              | 8 |
| hsa-miR-559     | 927  | 8:1:1 | 1.5   | -9.03  | 10.53 | AAAUAU<br>GCACCA<br>AAA<br>UGUAAA           | TTTTTTTT<br>TTTTT           | 8 |
| hsa-miR-30a     | 908  | 8:1:1 | -1.1  | -11.63 | 10.53 | CAUCCU<br>CGACUG<br>GAAG<br>UGUAAA          | ATATTTA<br>TATGA            | 8 |
| hsa-miR-30c     | 908  | 8:1:1 | -1.1  | -11.63 | 10.53 | CAUCCU<br>ACACUC<br>UCAGC<br>UGUAAA         | ATATTTA<br>TATGATA<br>TCCTT | 8 |
| hsa-miR-30d     | 908  | 8:1:1 | -1.1  | -11.63 | 10.53 | CAUCCC<br>CGACUG<br>GAAG<br>UGUAAA          | ATATTTA<br>TATGATA<br>TCC   | 8 |
| hsa-miR-30b     | 908  | 8:1:1 | -1.1  | -11.63 | 10.53 | CAUCCU<br>ACACUC<br>AGCU                    | ATATTTA<br>TATGATA          | 8 |

|                 |      |       |       |        |       |                                                          |   |
|-----------------|------|-------|-------|--------|-------|----------------------------------------------------------|---|
| hsa-miR-30e     | 908  | 8:1:1 | -1.1  | -11.63 | 10.53 | UGUAAA<br>CAUCCU ATATTTA<br>UGACUG TATGAT                | 8 |
| hsa-miR-559     | 936  | 8:1:1 | 1.5   | -9.04  | 10.54 | UAAAGU<br>AAAUAU TTTTTTTT<br>GCACCA TTTGTAT<br>AAA TCA   | 8 |
| hsa-miR-548h    | 544  | 8:1:0 | 0.4   | -10.14 | 10.54 | AAAAGU<br>AAUCGC ATTAATT<br>GGUUUU TGTTT                 | 8 |
| hsa-miR-380     | 1107 | 8:1:1 | -2.2  | -12.75 | 10.55 | UGG UUG<br>ACCAUA TAATATA<br>GAACAU TTTATTA<br>GCGC AAA  | 8 |
| hsa-miR-656     | 232  | 8:1:0 | -1.7  | -12.25 | 10.55 | AGGUUG<br>CCUGUG TATAATT<br>AGGUGU TGTTTTT<br>UCA        | 8 |
| hsa-miR-186     | 449  | 8:1:1 | -0.5  | -11.09 | 10.59 | CAAAGA<br>AUUCUC AATTTGT<br>CUUUUG TTTATTT<br>GGCU GTATA | 8 |
| hsa-miR-559     | 929  | 8:1:1 | 1.5   | -9.13  | 10.63 | UAAAGU<br>AAAUAU TTTTTTTT<br>GCACCA TT                   | 8 |
| hsa-miR-548c-5p | 510  | 8:1:1 | -4.3  | -14.93 | 10.63 | AAAAGU<br>AAUUGC ATTATTT<br>GGUUUU GTATATA<br>UGCC TAT   | 8 |
| hsa-miR-548i    | 510  | 8:1:1 | -4.3  | -14.93 | 10.63 | AAAAGU<br>AAUUGC ATTATTT<br>GGUUUU GTAT<br>UGCC          | 8 |
| hsa-miR-577     | 486  | 8:1:1 | -4.3  | -14.96 | 10.66 | UAGUAU<br>AAAUAU TTTTGTG<br>UGGUAC TTTATTT<br>CUG GACAC  | 8 |
| hsa-miR-559     | 928  | 8:1:1 | 1.5   | -9.18  | 10.68 | UAAAGU<br>AAAUAU TTTTTTTT<br>GCACCA TTTTTTTT<br>AAA      | 8 |
| hsa-miR-651     | 1173 | 8:1:0 | -3.8  | -14.49 | 10.69 | UUUAGG<br>AUAAGC TATCATA<br>UUGACU AGTTGTA<br>UUUG AAA   | 8 |
| hsa-miR-495     | 46   | 8:1:0 | -4.8  | -15.52 | 10.72 | GAAGUU<br>GCCCAU TGTTTAT<br>GUUAUU TTTTTTTT<br>UUCG      | 8 |
| hsa-miR-181c    | 532  | 8:1:0 | -5.06 | -15.81 | 10.75 | AACAUU<br>CAACCU TTGAATT<br>GUCGGU TTT<br>GAGU           | 8 |
| hsa-miR-559     | 79   | 8:1:1 | -4.2  | -14.97 | 10.77 | UAAAGU<br>AAAUAU TTTATTT<br>GCACCA GTA<br>AAA            | 8 |
| hsa-miR-487a    | 1171 | 8:1:0 | -3.6  | -14.38 | 10.78 | GUGGUU<br>AUCCCU TGTATCA<br>GCUGUG TAAGTTG<br>UUCG TAAA  | 8 |
| hsa-miR-559     | 930  | 8:1:1 | 1.5   | -9.28  | 10.78 | UAAAGU<br>AAAUAU TTTTTTTT<br>GCACCA TTTTTTTT<br>AAA      | 8 |

|                 |      |       |       |        |       |                                                |                             |   |
|-----------------|------|-------|-------|--------|-------|------------------------------------------------|-----------------------------|---|
| hsa-miR-1259    | 123  | 8:1:1 | -2.6  | -13.39 | 10.79 | UCCCUG<br>AGACCC<br>UUUAAC<br>CUGUGA<br>AGGUUG | AGTATAT<br>ATATATT<br>T     | 8 |
| hsa-miR-410     | 479  | 8:1:0 | -2.86 | -13.66 | 10.8  | UCUGUG<br>AUGAGU<br>UCG<br>UGC AAA             | TGTTTTA<br>TTTT             | 8 |
| hsa-miR-548g    | 131  | 8:1:1 | -2.25 | -13.05 | 10.8  | AGUAAU<br>UGCAGU<br>UUUUG<br>AGGUUG            | TATATTT<br>TTATT            | 8 |
| hsa-miR-656     | 1183 | 8:1:1 | -1.4  | -12.22 | 10.82 | CCUGUG<br>AGGUGU<br>UCA<br>AAAAGU              | TGTAAAA<br>TACCATA<br>A     | 8 |
| hsa-miR-548h    | 482  | 8:1:1 | -3.7  | -14.55 | 10.85 | AAUCGC<br>GGUUUU<br>UGUC<br>CAAAAA             | TTTATTTT<br>GTGT            | 8 |
| hsa-miR-548d-3p | 238  | 8:1:0 | -2.4  | -13.31 | 10.91 | CCACAG<br>UUUCUU<br>UUGC<br>AGGUUG             | TTGTTTT<br>TTTGTTT<br>T     | 8 |
| hsa-miR-656     | 1154 | 8:1:1 | -3.8  | -14.72 | 10.92 | CCUGUG<br>AGGUGU<br>UCA<br>UAAAGU              | TGTAATA<br>ATAAAA           | 8 |
| hsa-miR-559     | 937  | 8:1:1 | 1.5   | -9.43  | 10.93 | AAAUAU<br>GCACCA<br>AAA<br>UGUAAA              | TTTTTTTT<br>TTGT            | 8 |
| hsa-miR-30c     | 134  | 8:1:1 | -0.4  | -11.34 | 10.94 | CAUCCU<br>ACACUC<br>UCAGC<br>UGUAAA            | ATTTTTA<br>TTT              | 8 |
| hsa-miR-30b     | 134  | 8:1:1 | -0.4  | -11.34 | 10.94 | CAUCCU<br>ACACUC<br>AGCU<br>AUCAAG             | ATTTTTA<br>TTTTGA           | 8 |
| hsa-miR-561     | 131  | 8:1:1 | -2.1  | -13.05 | 10.95 | GAUCUU<br>AAACUU<br>UGCC<br>GUGGUU             | TATATTT<br>TTATTTT<br>G     | 8 |
| hsa-miR-487b    | 1171 | 8:1:1 | -3.4  | -14.38 | 10.98 | AUCCCU<br>GUCCUG<br>UUCG<br>UCAAAU             | TGTATCA<br>TAAGTTG<br>TAAAA | 8 |
| hsa-miR-105     | 161  | 8:1:1 | -2.9  | -13.88 | 10.98 | GCUCAG<br>ACUCCU<br>GUGGU<br>UUCAAG            | AATATTT<br>GTATATA<br>TATAT | 8 |
| hsa-miR-1297    | 80   | 8:1:1 | -4.1  | -15.08 | 10.98 | UUAUUC<br>AGGUG<br>AAUGGA<br>UUUUUG            | TTATTTG<br>TATATTC<br>ATT   | 8 |
| hsa-miR-1246    | 107  | 8:1:1 | -1.6  | -12.63 | 11.03 | GAGCAG<br>G<br>CUAAUA                          | AAATATA<br>TATATTC<br>AT    | 8 |
| hsa-miR-633     | 133  | 8:1:1 | -1.2  | -12.25 | 11.05 | GUAUCU<br>ACCACA<br>AUAAA<br>AAAUUA            | TATTTTT<br>ATTTT            | 8 |
| hsa-miR-944     | 1135 | 8:1:1 | -1.9  | -12.98 | 11.08 | UUGUAC<br>AUCGGA<br>UGAG                       | TAATTAT<br>TTTG             | 8 |

|                 |      |       |       |        |       |                                             |                             |   |
|-----------------|------|-------|-------|--------|-------|---------------------------------------------|-----------------------------|---|
| hsa-miR-559     | 938  | 8:1:1 | 1.5   | -9.6   | 11.1  | UAAAGU<br>AAAUAU<br>GCACCA<br>AAA<br>UAGAUA | TTTTTTTT<br>TGTATTC<br>ATAC | 8 |
| hsa-miR-577     | 193  | 8:1:1 | -0.7  | -11.81 | 11.11 | AAAUAU<br>UGGUAC<br>CUG                     | TTTTGGC<br>TTTTATA<br>TAA   | 8 |
| hsa-miR-656     | 676  | 8:1:0 | -0.8  | -12.02 | 11.22 | AGGUUG<br>CCUGUG<br>AGGUGU<br>UCA           | TATTATA<br>TGGTCC<br>ATA    | 8 |
| hsa-miR-144     | 522  | 8:1:1 | -3.6  | -14.84 | 11.24 | GGAUAU<br>CAUCAU<br>AUACUG<br>UAAG          | TATATTT<br>TGTTTG           | 8 |
| hsa-miR-577     | 1009 | 8:1:1 | -1.7  | -12.96 | 11.26 | UAGAUA<br>AAAUAU<br>UGGUAC<br>CUG           | TTTTTTTT<br>TAACG           | 8 |
| hsa-miR-548p    | 67   | 8:0:1 | -5.3  | -16.6  | 11.3  | UAGCAA<br>AAACUG<br>CAGUUA<br>CUUU          | TTTTTGT<br>TAT              | 8 |
| hsa-miR-548n    | 483  | 8:1:1 | -3.2  | -14.52 | 11.32 | CAAAAAG<br>UAAUUG<br>UGGAUU<br>UUGU         | TTATTTT<br>GTGTTTA<br>TTTGA | 8 |
| hsa-miR-802     | 135  | 8:1:1 | -0.2  | -11.52 | 11.32 | CAGUAA<br>CAAAGA<br>UUCAUC<br>CUUGU         | TTTTTATT<br>TTGATAT<br>ATT  | 8 |
| hsa-miR-888     | 486  | 8:1:0 | -3.6  | -14.96 | 11.36 | UACUCA<br>AAAAGC<br>UGUCAG<br>UCA           | TTTTGTG<br>TTTATT           | 8 |
| hsa-miR-548d-3p | 187  | 8:1:0 | -2.4  | -13.76 | 11.36 | CAAAAA<br>CCACAG<br>UUUCUU<br>UUGC          | TTGTTTT<br>TTT              | 8 |
| hsa-miR-548b-5p | 482  | 8:1:1 | -3.1  | -14.55 | 11.45 | AAAAGU<br>AAUUGU<br>GGUUUU<br>GGCC          | TTTATTTT<br>GTGTTTA         | 8 |
| hsa-miR-548d-5p | 482  | 8:1:1 | -3.1  | -14.55 | 11.45 | AAAAGU<br>AAUUGU<br>GGUUUU<br>UGCC          | TTTATTTT<br>GTGTT           | 8 |
| hsa-miR-548g    | 232  | 8:1:1 | -0.8  | -12.25 | 11.45 | UGCAAA<br>AGUAAU<br>UGCAGU<br>UUUUG         | TATAATT<br>TGTTTT           | 8 |
| hsa-miR-548p    | 525  | 8:1:1 | -4.4  | -15.93 | 11.53 | UAGCAA<br>AAACUG<br>CAGUUA<br>CUUU          | ATTTTGT<br>TTGAATT<br>T     | 8 |
| hsa-miR-548e    | 237  | 8:1:1 | -1.95 | -13.56 | 11.61 | CAAAAAG<br>CAAUCG<br>CGGUUU<br>UUGC         | TTTGTTT<br>TTTTG            | 8 |
| hsa-miR-548g    | 181  | 8:1:1 | -2.39 | -14.03 | 11.64 | UGCAAA<br>AGUAAU<br>UGCAGU<br>UUUUG         | TATAATT<br>TGTTTTT<br>TT    | 8 |
| hsa-miR-548n    | 49   | 8:0:1 | -5.7  | -17.36 | 11.66 | CAAAAAG<br>UAAUUG<br>UGGAUU<br>UUGU         | TTATTTT<br>TTTTTTTT<br>TTT  | 8 |

|                 |      |       |       |        |       |                                             |                            |   |
|-----------------|------|-------|-------|--------|-------|---------------------------------------------|----------------------------|---|
| hsa-miR-559     | 48   | 8:0:1 | -5.3  | -16.98 | 11.68 | UAAAGU<br>AAAUAU<br>GCACCA<br>AAA<br>AAAAGU | TTTTTTTT<br>TTTTT          | 8 |
| hsa-miR-548h    | 536  | 8:1:1 | 0.6   | -11.1  | 11.7  | AAUCGC<br>GGUUUU<br>UGUC<br>UGCAAC          | ATTTTTTT<br>ATTA           | 8 |
| hsa-miR-891b    | 183  | 8:1:1 | -2    | -13.7  | 11.7  | UUACCU<br>GAGUCA<br>UUGA<br>CAAAAG          | TAATTTG<br>TTTTTTT<br>GG   | 8 |
| hsa-miR-548e    | 186  | 8:1:1 | -1.9  | -13.61 | 11.71 | CAAUCG<br>CGGUUU<br>UUGC<br>CUACAA          | TTTGTTT<br>TTTTG           | 8 |
| hsa-miR-520d-5p | 199  | 8:1:1 | -2.5  | -14.27 | 11.77 | AGGGAA<br>GCCCUU<br>UC<br>GGAUUAU           | CTTTTAT<br>ATA             | 8 |
| hsa-miR-144     | 74   | 8:1:1 | -2.6  | -14.41 | 11.81 | CAUCAU<br>AUACUG<br>UAAG<br>UUAUAA          | TATATTT<br>TATTTGT<br>ATAT | 8 |
| hsa-miR-374a    | 70   | 8:1:1 | -5.53 | -17.36 | 11.83 | UACAAC<br>CUGAUA<br>AGUG<br>CAAAGA          | TTGTTAT<br>ATTT            | 8 |
| hsa-miR-186     | 235  | 8:1:1 | -0.4  | -12.25 | 11.85 | AUUCUC<br>CUUUUG<br>GGCU<br>CAAAAG          | AATTTGT<br>TTTTTTG         | 8 |
| hsa-miR-548n    | 80   | 8:1:1 | -3.2  | -15.08 | 11.88 | UAAUUG<br>UGGAUU<br>UUGU<br>AGGUUG          | TTATTTG<br>TATATTC<br>ATTT | 8 |
| hsa-miR-494     | 50   | 8:1:1 | -5.6  | -17.48 | 11.88 | UCCGUG<br>UUGUCU<br>UCUCU<br>CAAAGG         | TATTTTTT<br>TTT            | 8 |
| hsa-miR-548m    | 521  | 8:1:1 | -2.6  | -14.61 | 12.01 | UAUUUG<br>UGGUUU<br>UUG<br>CAAAAA           | ATATATT<br>TTGTTTG<br>AA   | 8 |
| hsa-miR-548d-3p | 239  | 8:1:0 | -0.6  | -12.63 | 12.03 | CCACAG<br>UUUCUU<br>UUGC<br>UAGAUA          | TGTTTTT<br>TTGT            | 8 |
| hsa-miR-577     | 47   | 8:1:1 | -4.3  | -16.37 | 12.07 | AAAUAU<br>UGGUAC<br>CUG<br>UGCAAA           | GTTTATT<br>TTTTTTTT<br>TTT | 8 |
| hsa-miR-548g    | 74   | 8:1:1 | -2.3  | -14.41 | 12.11 | AGUAAU<br>UGCAGU<br>UUUUG<br>AAAGAC         | TATATTT<br>TATTTG          | 8 |
| hsa-miR-641     | 74   | 8:1:1 | -2.2  | -14.41 | 12.21 | AUAGGA<br>UAGAGU<br>CACCUC<br>AAAAGU        | TATATTT<br>TATTTGT<br>ATA  | 8 |
| hsa-miR-548a-5p | 51   | 8:1:1 | -5.1  | -17.31 | 12.21 | AAUUGC<br>GAGUUU<br>UACC<br>UAGAUA          | ATTTTTTT<br>TTTTTTTT<br>TT | 8 |
| hsa-miR-577     | 1010 | 8:1:1 | -1.1  | -13.32 | 12.22 | AAAUAU<br>UGGUAC<br>CUG                     | TTTTTTTT<br>AACGC          | 8 |

|                 |      |       |       |        |       |                                                |                             |   |
|-----------------|------|-------|-------|--------|-------|------------------------------------------------|-----------------------------|---|
| hsa-miR-577     | 200  | 8:1:0 | -1.8  | -14.06 | 12.26 | UAGAUU<br>AAAUU<br>UGGUAC<br>CUG               | TTTTATA<br>TAATATT<br>TGTA  | 8 |
| hsa-miR-548l    | 535  | 8:1:1 | -1.2  | -13.47 | 12.27 | AAAAGU<br>AUUUGC<br>GGGUUU<br>UGUC             | AATTTTT<br>TTATTAA<br>TTT   | 8 |
| hsa-miR-656     | 181  | 8:1:0 | -1.7  | -14.03 | 12.33 | AGGUUG<br>CCUGUG<br>AGGUGU<br>UCA              | TATAATT<br>TGTTTTT<br>TTGG  | 8 |
| hsa-miR-641     | 131  | 8:1:1 | -0.7  | -13.05 | 12.35 | AAAGAC<br>AUAGGA<br>UAGAGU<br>CACCUC<br>UAAAGU | TATATTT<br>TTATTTT<br>GATAT | 8 |
| hsa-miR-559     | 74   | 8:1:1 | -2    | -14.41 | 12.41 | AAAUU<br>GCACCA<br>AAA<br>AUCAAG               | TATATTT<br>TATTTG           | 8 |
| hsa-miR-561     | 74   | 8:1:1 | -1.9  | -14.41 | 12.51 | GAUCUU<br>AAACUU<br>UGCC                       | TATATTT<br>TATT             | 8 |
| hsa-miR-548p    | 487  | 8:1:1 | -2.06 | -14.67 | 12.61 | UAGCAA<br>AAACUG<br>CAGUUA<br>CUUU<br>CAAAAA   | TTTGTGT<br>TTATTTG<br>ACA   | 8 |
| hsa-miR-548d-3p | 188  | 8:1:0 | -0.6  | -13.22 | 12.62 | CCACAG<br>UUUCUU<br>UUGC                       | TGTTTTT<br>TTGG             | 8 |
| hsa-miR-548g    | 522  | 8:1:1 | -2.2  | -14.84 | 12.64 | UGCAAA<br>AGUAAU<br>UGCAGU<br>UUUUG            | TATATTT<br>TGTTTGA<br>ATTT  | 8 |
| hsa-miR-494     | 522  | 8:1:1 | -2.15 | -14.84 | 12.69 | AGGUUG<br>UCCGUG<br>UUGUCU<br>UCUCU            | TATATTT<br>TGTTT            | 8 |
| hsa-miR-664     | 1164 | 8:1:0 | 0     | -12.71 | 12.71 | ACUGGC<br>UAGGGA<br>AAAUGA<br>UUGGAU<br>UGGUUG | AAATTAA<br>TGTATCA<br>TAAGT | 8 |
| hsa-miR-380     | 76   | 8:1:1 | -2.3  | -15.15 | 12.85 | ACCAUA<br>GAACAU<br>GCGC                       | TATTTTA<br>TTTGTAT          | 8 |
| hsa-miR-548n    | 55   | 8:1:1 | -3.4  | -16.3  | 12.9  | CAAAAAG<br>UAAUUG<br>UGGAUU<br>UUGU            | TTTTTTTT<br>TTTTTTTT        | 8 |
| hsa-miR-494     | 131  | 8:1:1 | -0.1  | -13.05 | 12.95 | AGGUUG<br>UCCGUG<br>UUGUCU<br>UCUCU            | TATATTT<br>TTATTTT          | 8 |
| hsa-miR-548p    | 1009 | 8:1:1 | 0     | -12.96 | 12.96 | UAGCAA<br>AAACUG<br>CAGUUA<br>CUUU<br>CAAAAAG  | TTTTTTTT<br>TAACGCT<br>T    | 8 |
| hsa-miR-548n    | 1010 | 8:1:1 | -0.35 | -13.32 | 12.97 | UAAUUG<br>UGGAUU<br>UUGU                       | TTTTTTTT<br>AACGCT          | 8 |
| hsa-miR-543     | 533  | 8:1:1 | -2.64 | -15.61 | 12.97 | AAACAU<br>UCGCGG<br>UGCACU<br>UCUU             | TGAATTT<br>TTTT             | 8 |

|                 |      |       |      |        |       |                                                                                                                        |                                                                                                        |   |
|-----------------|------|-------|------|--------|-------|------------------------------------------------------------------------------------------------------------------------|--------------------------------------------------------------------------------------------------------|---|
| hsa-miR-429     | 159  | 8:1:1 | 0.1  | -12.87 | 12.97 | UAAUAC<br>UGUCUG<br>GUAATA<br>CCGU<br>GAAGUU<br>GCCCC<br>GUUAUU<br>UUCG<br>CAUAAA<br>GUAGAA<br>AGCACU<br>ACU<br>UAAAGU | ATAATAT<br>TTG<br><br><br>TTTTTGT<br>TATATTT<br>TA<br><br>TAATTTG<br>TTTTTT<br><br>TTTTTTTT<br>TAACGCT | 8 |
| hsa-miR-495     | 67   | 8:1:0 | -3.6 | -16.6  | 13    | UAAUAC<br>UGUCUG<br>GUAATA<br>CCGU<br>GAAGUU<br>GCCCC<br>GUUAUU<br>UUCG<br>CAUAAA<br>GUAGAA<br>AGCACU<br>ACU<br>UAAAGU | ATAATAT<br>TTG<br><br><br>TTTTTGT<br>TATATTT<br>TA<br><br>TAATTTG<br>TTTTTT<br><br>TTTTTTTT<br>TAACGCT | 8 |
| hsa-miR-142-5p  | 183  | 8:1:1 | -0.6 | -13.7  | 13.1  | UAAUAC<br>UGUCUG<br>GUAATA<br>CCGU<br>GAAGUU<br>GCCCC<br>GUUAUU<br>UUCG<br>CAUAAA<br>GUAGAA<br>AGCACU<br>ACU<br>UAAAGU | ATAATAT<br>TTG<br><br><br>TTTTTGT<br>TATATTT<br>TA<br><br>TAATTTG<br>TTTTTT<br><br>TTTTTTTT<br>TAACGCT | 8 |
| hsa-miR-559     | 1009 | 8:1:1 | 0.2  | -12.96 | 13.16 | UAAUAC<br>UGUCUG<br>GUAATA<br>CCGU<br>GAAGUU<br>GCCCC<br>GUUAUU<br>UUCG<br>CAUAAA<br>GUAGAA<br>AGCACU<br>ACU<br>UAAAGU | ATAATAT<br>TTG<br><br><br>TTTTTGT<br>TATATTT<br>TA<br><br>TAATTTG<br>TTTTTT<br><br>TTTTTTTT<br>TAACGCT | 8 |
| hsa-miR-186     | 184  | 8:1:1 | -0.4 | -13.77 | 13.37 | UAAUAC<br>UGUCUG<br>GUAATA<br>CCGU<br>GAAGUU<br>GCCCC<br>GUUAUU<br>UUCG<br>CAUAAA<br>GUAGAA<br>AGCACU<br>ACU<br>UAAAGU | ATAATAT<br>TTG<br><br><br>TTTTTGT<br>TATATTT<br>TA<br><br>TAATTTG<br>TTTTTT<br><br>TTTTTTTT<br>TAACGCT | 8 |
| hsa-miR-548b-5p | 48   | 8:1:1 | -3.5 | -16.98 | 13.48 | UAAUAC<br>UGUCUG<br>GUAATA<br>CCGU<br>GAAGUU<br>GCCCC<br>GUUAUU<br>UUCG<br>CAUAAA<br>GUAGAA<br>AGCACU<br>ACU<br>UAAAGU | ATAATAT<br>TTG<br><br><br>TTTTTGT<br>TATATTT<br>TA<br><br>TAATTTG<br>TTTTTT<br><br>TTTTTTTT<br>TAACGCT | 8 |
| hsa-miR-548d-5p | 48   | 8:1:1 | -3.5 | -16.98 | 13.48 | UAAUAC<br>UGUCUG<br>GUAATA<br>CCGU<br>GAAGUU<br>GCCCC<br>GUUAUU<br>UUCG<br>CAUAAA<br>GUAGAA<br>AGCACU<br>ACU<br>UAAAGU | ATAATAT<br>TTG<br><br><br>TTTTTGT<br>TATATTT<br>TA<br><br>TAATTTG<br>TTTTTT<br><br>TTTTTTTT<br>TAACGCT | 8 |
| hsa-miR-577     | 73   | 8:1:1 | -1.9 | -15.44 | 13.54 | UAAUAC<br>UGUCUG<br>GUAATA<br>CCGU<br>GAAGUU<br>GCCCC<br>GUUAUU<br>UUCG<br>CAUAAA<br>GUAGAA<br>AGCACU<br>ACU<br>UAAAGU | ATAATAT<br>TTG<br><br><br>TTTTTGT<br>TATATTT<br>TA<br><br>TAATTTG<br>TTTTTT<br><br>TTTTTTTT<br>TAACGCT | 8 |
| hsa-miR-641     | 50   | 8:1:1 | -3.9 | -17.48 | 13.58 | UAAUAC<br>UGUCUG<br>GUAATA<br>CCGU<br>GAAGUU<br>GCCCC<br>GUUAUU<br>UUCG<br>CAUAAA<br>GUAGAA<br>AGCACU<br>ACU<br>UAAAGU | ATAATAT<br>TTG<br><br><br>TTTTTGT<br>TATATTT<br>TA<br><br>TAATTTG<br>TTTTTT<br><br>TTTTTTTT<br>TAACGCT | 8 |
| hsa-miR-548p    | 1010 | 8:1:1 | 0.3  | -13.32 | 13.62 | UAAUAC<br>UGUCUG<br>GUAATA<br>CCGU<br>GAAGUU<br>GCCCC<br>GUUAUU<br>UUCG<br>CAUAAA<br>GUAGAA<br>AGCACU<br>ACU<br>UAAAGU | ATAATAT<br>TTG<br><br><br>TTTTTGT<br>TATATTT<br>TA<br><br>TAATTTG<br>TTTTTT<br><br>TTTTTTTT<br>TAACGCT | 8 |
| hsa-miR-513a-3p | 533  | 8:1:0 | -1.9 | -15.61 | 13.71 | UAAUAC<br>UGUCUG<br>GUAATA<br>CCGU<br>GAAGUU<br>GCCCC<br>GUUAUU<br>UUCG<br>CAUAAA<br>GUAGAA<br>AGCACU<br>ACU<br>UAAAGU | ATAATAT<br>TTG<br><br><br>TTTTTGT<br>TATATTT<br>TA<br><br>TAATTTG<br>TTTTTT<br><br>TTTTTTTT<br>TAACGCT | 8 |
| hsa-miR-548c-3p | 534  | 8:1:1 | -0.4 | -14.17 | 13.77 | UAAUAC<br>UGUCUG<br>GUAATA<br>CCGU<br>GAAGUU<br>GCCCC<br>GUUAUU<br>UUCG<br>CAUAAA<br>GUAGAA<br>AGCACU<br>ACU<br>UAAAGU | ATAATAT<br>TTG<br><br><br>TTTTTGT<br>TATATTT<br>TA<br><br>TAATTTG<br>TTTTTT<br><br>TTTTTTTT<br>TAACGCT | 8 |
| hsa-miR-142-5p  | 50   | 8:1:1 | -3.7 | -17.48 | 13.78 | UAAUAC<br>UGUCUG<br>GUAATA<br>CCGU<br>GAAGUU<br>GCCCC<br>GUUAUU<br>UUCG<br>CAUAAA<br>GUAGAA<br>AGCACU<br>ACU<br>UAAAGU | ATAATAT<br>TTG<br><br><br>TTTTTGT<br>TATATTT<br>TA<br><br>TAATTTG<br>TTTTTT<br><br>TTTTTTTT<br>TAACGCT | 8 |
| hsa-miR-577     | 52   | 8:1:1 | -4   | -17.8  | 13.8  | UAAUAC<br>UGUCUG<br>GUAATA<br>CCGU<br>GAAGUU<br>GCCCC<br>GUUAUU<br>UUCG<br>CAUAAA<br>GUAGAA<br>AGCACU<br>ACU<br>UAAAGU | ATAATAT<br>TTG<br><br><br>TTTTTGT<br>TATATTT<br>TA<br><br>TAATTTG<br>TTTTTT<br><br>TTTTTTTT<br>TAACGCT | 8 |
| hsa-miR-374b    | 70   | 8:1:1 | -3.5 | -17.36 | 13.86 | UAAUAC<br>UGUCUG<br>GUAATA<br>CCGU<br>GAAGUU<br>GCCCC<br>GUUAUU<br>UUCG<br>CAUAAA<br>GUAGAA<br>AGCACU<br>ACU<br>UAAAGU | ATAATAT<br>TTG<br><br><br>TTTTTGT<br>TATATTT<br>TA<br><br>TAATTTG<br>TTTTTT<br><br>TTTTTTTT<br>TAACGCT | 8 |
| hsa-miR-548n    | 73   | 8:1:1 | -1.5 | -15.44 | 13.94 | UAAUAC<br>UGUCUG<br>GUAATA<br>CCGU<br>GAAGUU<br>GCCCC<br>GUUAUU<br>UUCG<br>CAUAAA<br>GUAGAA<br>AGCACU<br>ACU<br>UAAAGU | ATAATAT<br>TTG<br><br><br>TTTTTGT<br>TATATTT<br>TA<br><br>TAATTTG<br>TTTTTT<br><br>TTTTTTTT<br>TAACGCT | 8 |
| hsa-miR-548n    | 56   | 8:1:1 | -1.9 | -15.86 | 13.96 | UAAUAC<br>UGUCUG<br>GUAATA<br>CCGU<br>GAAGUU<br>GCCCC<br>GUUAUU<br>UUCG<br>CAUAAA<br>GUAGAA<br>AGCACU<br>ACU<br>UAAAGU | ATAATAT<br>TTG<br><br><br>TTTTTGT<br>TATATTT<br>TA<br><br>TAATTTG<br>TTTTTT<br><br>TTTTTTTT<br>TAACGCT | 8 |

|                 |      |       |       |        |       |                                              |                             |   |
|-----------------|------|-------|-------|--------|-------|----------------------------------------------|-----------------------------|---|
| hsa-miR-548h    | 48   | 8:1:1 | -3    | -16.98 | 13.98 | AAAAGU<br>AAUCGC<br>GGUUUU<br>UGUC<br>UAAAGU | TTTTATTT<br>TTTT            | 8 |
| hsa-miR-559     | 52   | 8:1:1 | -3.7  | -17.8  | 14.1  | AAAUAU<br>GCACCA<br>AAA<br>AUCAAG            | TTTTTTTT<br>TTTTTT          | 8 |
| hsa-miR-561     | 522  | 8:1:1 | -0.7  | -14.84 | 14.14 | GAUCUU<br>AAACUU<br>UGCC                     | TATATTT<br>TGTTTG           | 8 |
| hsa-miR-548i    | 48   | 8:1:1 | -2.8  | -16.98 | 14.18 | AAAAGU<br>AAUUGC<br>GGUUUU<br>UGCC           | TTTTATTT<br>TTTTTTTT<br>T   | 8 |
| hsa-miR-559     | 1010 | 8:1:1 | 0.9   | -13.32 | 14.22 | AAAUAU<br>GCACCA<br>AAA                      | TTTTTTTT<br>AA              | 8 |
| hsa-miR-548c-5p | 48   | 8:1:1 | -2.6  | -16.98 | 14.38 | AAAAGU<br>AAUUGC<br>GGUUUU<br>UGCC           | TTTTATTT<br>TTTTTTTT<br>TT  | 8 |
| hsa-miR-548j    | 48   | 8:1:1 | -2.6  | -16.98 | 14.38 | AAAAGU<br>AAUUGC<br>GGUCUU<br>UGGU           | TTTTATTT<br>TTTTTTTT<br>TTT | 8 |
| hsa-miR-548n    | 57   | 8:1:1 | -1.3  | -15.71 | 14.41 | CAAAAG<br>UAAUUG<br>UGGAUU<br>UUGU           | TTTTTTTT<br>TTTTTT<br>GTTA  | 8 |
| hsa-miR-186     | 1136 | 8:1:0 | 0.8   | -13.64 | 14.44 | CAAAGA<br>AUUCUC<br>CUUUUG<br>GGCU           | AATTATT<br>TTGTAC<br>AA     | 8 |
| hsa-miR-369-3p  | 69   | 8:1:1 | -2.3  | -17.24 | 14.94 | AAUAAU<br>ACAUGG<br>UGAUC<br>UUU             | TTTGTTA<br>TATTTT           | 8 |
| hsa-miR-548n    | 54   | 8:1:1 | -2.1  | -17.24 | 15.14 | CAAAAG<br>UAAUUG<br>UGGAUU<br>UUGU           | TTTTTTTT<br>TTTT            | 8 |
| hsa-miR-513a-3p | 532  | 8:1:1 | -0.6  | -15.81 | 15.21 | UAAAUU<br>UCACCU<br>UUCUGA<br>GAAGG          | TTGAATT<br>TTT              | 8 |
| hsa-miR-361-5p  | 68   | 8:1:1 | -1.8  | -17.05 | 15.25 | UUAUCA<br>GAAUCU<br>CCAGGG<br>GUAC           | TTTTGTT<br>ATATTTT<br>ATT   | 8 |
| hsa-miR-548n    | 58   | 8:1:1 | -0.72 | -16.18 | 15.46 | CAAAAG<br>UAAUUG<br>UGGAUU<br>UUGU           | TTTTTTTT<br>TTTTT           | 8 |
| hsa-miR-186     | 509  | 8:1:1 | 0.4   | -15.26 | 15.66 | CAAAGA<br>AUUCUC<br>CUUUUG<br>GGCU           | GATTATT<br>TGTATAT<br>AT    | 8 |
| hsa-miR-548p    | 52   | 8:1:1 | -1.8  | -17.8  | 16    | UAGCAA<br>AAACUG<br>CAGUUA<br>CUUU           | TTTTTTTT<br>TTT             | 8 |
| hsa-miR-548n    | 64   | 8:1:1 | 0     | -16.08 | 16.08 | CAAAAG<br>UAAUUG<br>UGGAUU<br>UUGU           | TTTTTTTT<br>GTTAT           | 8 |

|              |    |       |       |        |       |                                              |                              |   |
|--------------|----|-------|-------|--------|-------|----------------------------------------------|------------------------------|---|
| hsa-miR-548p | 57 | 8:1:1 | 0.4   | -15.71 | 16.11 | UAGCAA<br>AAACUG<br>CAGUUA<br>CUUU<br>CAAAAG | TTTTTTTT<br>TTTTTTTT<br>GTTA | 8 |
| hsa-miR-548n | 53 | 8:1:1 | -1.7  | -17.87 | 16.17 | UAAUUG<br>UGGAUU<br>UUGU<br>CAAAGA           | TTTTTTTT<br>TTTTTTTT<br>TTT  | 8 |
| hsa-miR-186  | 50 | 8:1:1 | -1.3  | -17.48 | 16.18 | AUUCUC<br>CUUUUG<br>GGCU<br>UAGUAU           | TATTTTTT<br>TTTTTTTT         | 8 |
| hsa-miR-577  | 57 | 8:1:1 | 0.5   | -15.71 | 16.21 | AAAUAU<br>UGGUAC<br>CUG<br>UAGCAA            | TTTTTTTT<br>TTTTTTTT<br>GTT  | 8 |
| hsa-miR-548p | 56 | 8:1:1 | 0.4   | -15.86 | 16.26 | AAACUG<br>CAGUUA<br>CUUU<br>UAGUAU           | TTTTTTTT<br>TTT              | 8 |
| hsa-miR-577  | 58 | 8:1:1 | 0.1   | -16.18 | 16.28 | AAAUAU<br>UGGUAC<br>CUG<br>CAAAAG            | TTTTTTTT<br>TTT              | 8 |
| hsa-miR-548n | 59 | 8:1:1 | -0.14 | -16.47 | 16.33 | UAAUUG<br>UGGAUU<br>UUGU<br>UAGUAU           | TTTTTTTT<br>TTTTTGT<br>T     | 8 |
| hsa-miR-577  | 64 | 8:1:1 | 0.3   | -16.08 | 16.38 | AAAUAU<br>UGGUAC<br>CUG<br>UAGCAA            | TTTTTTTT<br>GTTA             | 8 |
| hsa-miR-548p | 64 | 8:1:1 | 0.4   | -16.08 | 16.48 | AAACUG<br>CAGUUA<br>CUUU<br>UAGCAA           | TTTTTTTT<br>GT               | 8 |
| hsa-miR-548p | 55 | 8:1:1 | 0.2   | -16.3  | 16.5  | AAACUG<br>CAGUUA<br>CUUU<br>UAGCAA           | TTTTTTTT<br>TTTT             | 8 |
| hsa-miR-548p | 58 | 8:1:1 | 0.4   | -16.18 | 16.58 | AAACUG<br>CAGUUA<br>CUUU<br>CAAAGA           | TTTTTTTT<br>TT               | 8 |
| hsa-miR-186  | 51 | 8:1:1 | -0.7  | -17.31 | 16.61 | AUUCUC<br>CUUUUG<br>GGCU<br>UAGCAA           | ATTTTTTT<br>TTTTTTTT<br>T    | 8 |
| hsa-miR-548p | 63 | 8:1:1 | 0.4   | -16.25 | 16.65 | AAACUG<br>CAGUUA<br>CUUU<br>UAGUAU           | TTTTTTTT<br>TG               | 8 |
| hsa-miR-577  | 56 | 8:1:1 | 0.8   | -15.86 | 16.66 | AAAUAU<br>UGGUAC<br>CUG<br>AGGUUG            | TTTTTTTT<br>TT               | 8 |
| hsa-miR-656  | 71 | 8:1:1 | -0.1  | -16.78 | 16.68 | CCUGUG<br>AGGUGU<br>UCA<br>UAGUAU            | TGTTATA<br>TTTTATTT<br>GT    | 8 |
| hsa-miR-577  | 55 | 8:1:1 | 0.4   | -16.3  | 16.7  | AAAUAU<br>UGGUAC<br>CUG<br>AAAAGU            | TTTTTTTT<br>TTTTTTTT<br>TG   | 8 |
| hsa-miR-548i | 51 | 8:1:1 | -0.6  | -17.31 | 16.71 | AAUUGC<br>GGAUUU<br>UGCC                     | ATTTTTTT<br>TTTTTTTT<br>T    | 8 |

|                 |    |       |      |        |       |                                               |                             |   |
|-----------------|----|-------|------|--------|-------|-----------------------------------------------|-----------------------------|---|
| hsa-miR-548p    | 62 | 8:1:1 | 0.4  | -16.36 | 16.76 | UAGCAA<br>AAACUG<br>CAGUUA<br>CUUU<br>UAGCAA  | TTTTTTTT<br>TTGTT           | 8 |
| hsa-miR-548p    | 53 | 8:1:1 | -1.1 | -17.87 | 16.77 | AAACUG<br>CAGUUA<br>CUUU<br>UAGCAA            | TTTTTTTT<br>TTT             | 8 |
| hsa-miR-548p    | 61 | 8:1:1 | 0.4  | -16.4  | 16.8  | AAACUG<br>CAGUUA<br>CUUU<br>UAGCAA            | TTTTTTTT<br>TTTG            | 8 |
| hsa-miR-548p    | 54 | 8:1:1 | -0.4 | -17.24 | 16.84 | AAACUG<br>CAGUUA<br>CUUU<br>UAGCAA            | TTTTTTTT<br>TT              | 8 |
| hsa-miR-548n    | 63 | 8:1:1 | 0.6  | -16.25 | 16.85 | CAAAAAG<br>UAAUUG<br>UGGAUU<br>UUGU<br>UAGCAA | TTTTTTTT<br>TGTT            | 8 |
| hsa-miR-548p    | 59 | 8:1:1 | 0.4  | -16.47 | 16.87 | AAACUG<br>CAGUUA<br>CUUU<br>UAGUAU            | TTTTTTTT<br>TTT             | 8 |
| hsa-miR-577     | 53 | 8:1:1 | -1   | -17.87 | 16.87 | AAAUAU<br>UGGUAC<br>CUG                       | TTTTTTTT<br>TT              | 8 |
| hsa-miR-548c-5p | 51 | 8:1:1 | -0.4 | -17.31 | 16.91 | AAAAGU<br>AAUUGC<br>GGUUUU<br>UGCC            | ATTTTTTT<br>TTTTTTTT<br>T   | 8 |
| hsa-miR-548j    | 51 | 8:1:1 | -0.4 | -17.31 | 16.91 | AAAAGU<br>AAUUGC<br>GGUCUU<br>UGGU<br>UAGCAA  | ATTTTTTT<br>TTTTT           | 8 |
| hsa-miR-548p    | 60 | 8:1:1 | 0.4  | -16.54 | 16.94 | UAGCAA<br>AAACUG<br>CAGUUA<br>CUUU<br>UAGUAU  | TTTTTTTT<br>TTTTGTT<br>ATAT | 8 |
| hsa-miR-577     | 54 | 8:1:1 | -0.3 | -17.24 | 16.94 | AAAUAU<br>UGGUAC<br>CUG                       | TTTTTTTT<br>TTTTTTTT        | 8 |
| hsa-miR-548n    | 62 | 8:1:1 | 0.6  | -16.36 | 16.96 | CAAAAAG<br>UAAUUG<br>UGGAUU<br>UUGU           | TTTTTTTT<br>TTGTTAT<br>ATTT | 8 |
| hsa-miR-559     | 56 | 8:1:1 | 1.1  | -15.86 | 16.96 | UAAAAGU<br>AAAUAU<br>GCACCA<br>AAA            | TTTTTTTT<br>TTTTTTTT<br>G   | 8 |
| hsa-miR-559     | 64 | 8:1:1 | 0.9  | -16.08 | 16.98 | UAAAAGU<br>AAAUAU<br>GCACCA<br>AAA            | TTTTTTTT<br>GTTATAT<br>T    | 8 |
| hsa-miR-548n    | 60 | 8:1:1 | 0.44 | -16.54 | 16.98 | CAAAAAG<br>UAAUUG<br>UGGAUU<br>UUGU           | TTTTTTTT<br>TTTTGTT<br>AT   | 8 |
| hsa-miR-548n    | 61 | 8:1:1 | 0.6  | -16.4  | 17    | CAAAAAG<br>UAAUUG<br>UGGAUU<br>UUGU           | TTTTTTTT<br>TTTGT           | 8 |
| hsa-miR-548n    | 52 | 8:1:1 | -0.7 | -17.8  | 17.1  | CAAAAAG<br>UAAUUG<br>UGGAUU<br>UUGU           | TTTTTTTT<br>TTTTT           | 8 |

|                 |    |       |      |        |       |                                              |                             |   |
|-----------------|----|-------|------|--------|-------|----------------------------------------------|-----------------------------|---|
| hsa-miR-559     | 54 | 8:1:1 | -0.1 | -17.24 | 17.14 | UAAAGU<br>AAAUAU<br>GCACCA<br>AAA            | TTTTTTTT<br>TTTT            | 8 |
| hsa-miR-577     | 63 | 8:1:1 | 0.9  | -16.25 | 17.15 | UAGAUA<br>AAAUAU<br>UGGUAC<br>CUG            | TTTTTTTT<br>TGTTATA<br>TT   | 8 |
| hsa-miR-548e    | 49 | 8:1:1 | -0.2 | -17.36 | 17.16 | CAAAAG<br>CAAUCG<br>CGGUUU<br>UUGC<br>UAGAUA | TTATTTTT<br>TTTTTTTT        | 8 |
| hsa-miR-577     | 59 | 8:1:1 | 0.7  | -16.47 | 17.17 | AAAUAU<br>UGGUAC<br>CUG                      | TTTTTTTT<br>TTTTGT          | 8 |
| hsa-miR-559     | 55 | 8:1:1 | 0.9  | -16.3  | 17.2  | UAAAGU<br>AAAUAU<br>GCACCA<br>AAA            | TTTTTTTT<br>TTT             | 8 |
| hsa-miR-559     | 57 | 8:1:1 | 1.5  | -15.71 | 17.21 | UAAAGU<br>AAAUAU<br>GCACCA<br>AAA            | TTTTTTTT<br>TTTTTT          | 8 |
| hsa-miR-577     | 62 | 8:1:1 | 0.9  | -16.36 | 17.26 | UAGAUA<br>AAAUAU<br>UGGUAC<br>CUG            | TTTTTTTT<br>TTGTTAT<br>A    | 8 |
| hsa-miR-577     | 61 | 8:1:1 | 0.9  | -16.4  | 17.3  | UAGAUA<br>AAAUAU<br>UGGUAC<br>CUG            | TTTTTTTT<br>TTTGTTA<br>T    | 8 |
| hsa-miR-577     | 60 | 8:1:1 | 0.9  | -16.54 | 17.44 | UAGAUA<br>AAAUAU<br>UGGUAC<br>CUG            | TTTTTTTT<br>TTTTGTT         | 8 |
| hsa-miR-559     | 53 | 8:1:1 | -0.3 | -17.87 | 17.57 | UAAAGU<br>AAAUAU<br>GCACCA<br>AAA            | TTTTTTTT<br>TTTTTTTT<br>TTT | 8 |
| hsa-miR-559     | 58 | 8:1:1 | 1.5  | -16.18 | 17.68 | UAAAGU<br>AAAUAU<br>GCACCA<br>AAA            | TTTTTTTT<br>TTTT            | 8 |
| hsa-miR-559     | 63 | 8:1:1 | 1.5  | -16.25 | 17.75 | UAAAGU<br>AAAUAU<br>GCACCA<br>AAA            | TTTTTTTT<br>TGTTAT          | 8 |
| hsa-miR-559     | 62 | 8:1:1 | 1.5  | -16.36 | 17.86 | UAAAGU<br>AAAUAU<br>GCACCA<br>AAA            | TTTTTTTT<br>TTGTT           | 8 |
| hsa-miR-559     | 61 | 8:1:1 | 1.5  | -16.4  | 17.9  | UAAAGU<br>AAAUAU<br>GCACCA<br>AAA            | TTTTTTTT<br>TTTGTTA<br>T    | 8 |
| hsa-miR-548h    | 51 | 8:1:1 | 0.6  | -17.31 | 17.91 | AAAAGU<br>AAUCGC<br>GGUUUU<br>UGUC           | ATTTTTTT<br>TT              | 8 |
| hsa-miR-559     | 59 | 8:1:1 | 1.5  | -16.47 | 17.97 | UAAAGU<br>AAAUAU<br>GCACCA<br>AAA            | TTTTTTTT<br>TTTTGT          | 8 |
| hsa-miR-548b-5p | 51 | 8:1:1 | 0.7  | -17.31 | 18.01 | AAAAGU<br>AAUUGU<br>GGUUUU<br>GGCC           | ATTTTTTT<br>TTTT            | 8 |

|                 |          |     |        |       |                                              |                             |   |
|-----------------|----------|-----|--------|-------|----------------------------------------------|-----------------------------|---|
| hsa-miR-548d-5p | 51 8:1:1 | 0.7 | -17.31 | 18.01 | AAAAGU<br>AAUUGU<br>GGUUUU<br>UGCC<br>UAAAGU | ATTTTTTT<br>TTTTTTTT<br>TTT | 8 |
| hsa-miR-559     | 60 8:1:1 | 1.5 | -16.54 | 18.04 | AAAUAU<br>GCACCA<br>AAA                      | TTTTTTTT<br>TTTT            | 8 |
