# Supplementary material for: Red blood cells release microparticles containing human argonaute 2 and miRNAs to target genes of Plasmodium falciparum
Source: PubMed Central journal article supplement (PMC5583671; doi:10.1038/emi.2017.63), 2017-08-23
Supplement: emi201763x11.pdf [file emi201763x11.pdf]

Supplementary Table S6 Annotations of human miRNAs in high throughput sequencing

Parasites

| Seq ID   | Length | Read Count | Seq                      | Category | Annotation |
|----------|--------|------------|--------------------------|----------|------------|
| t0000001 | 22     | 233247     | AAACCGTTACCATTACTGAGTT   | miRNA    | miR-451    |
| t0000002 | 21     | 231838     | AAACCGTTACCATTACTGAGT    | miRNA    | miR-451    |
| t0000003 | 21     | 215314     | TGGAGAGAAAGGCAGTTCCTG    | miRNA    | miR-185    |
| t0000004 | 22     | 189897     | AAAAGCTGGGTTGAGAGGGCGA   | miRNA    | miR-320a   |
| t0000005 | 22     | 181534     | TGAGGGGCAGAGAGCGAGACTT   | miRNA    | miR-423-5p |
| t0000006 | 22     | 178960     | TGAGGTAGTAGTTTGTACAGTT   | miRNA    | let-7g     |
| t0000007 | 23     | 172858     | TACCACAGGGTAGAACCACGGAC  | miRNA    | miR-140    |
| t0000008 | 20     | 161954     | TAGCAGCACATCATGGTTTA     | miRNA    | miR-15b    |
| t0000009 | 22     | 155565     | TCCTGTACTGAGCTGCCCCGAG   | miRNA    | miR-486-5p |
| t0000010 | 21     | 139043     | TCCTGTACTGAGCTGCCCCGA    | miRNA    | miR-486-5p |
| t0000011 | 22     | 133544     | AGCAGCATTGTACAGGGCTATG   | miRNA    | miR-103a   |
| t0000012 | 20     | 129187     | TGAGGTAGTAGGTTGTATAG     | miRNA    | let-7      |
| t0000013 | 22     | 113850     | AGAGGTAGTAGGTTGCATAGTT   | miRNA    | let-7d     |
| t0000014 | 23     | 107039     | TGGAGAGAAAGGCAGTTCCTGAA  | miRNA    | miR-185    |
| t0000015 | 20     | 106741     | AAACCGTTACCATTACTGAG     | miRNA    | miR-451    |
| t0000016 | 23     | 103910     | AGCAGCATTGTACAGGGCTATGA  | miRNA    | miR-103a   |
| t0000017 | 23     | 100163     | TACCACAGGGTAGAACCACGGAA  | miRNA    | miR-140    |
| t0000018 | 22     | 96622      | CATTGCACTTGTCTCGGTCTGA   | miRNA    | miR-25     |
| t0000019 | 21     | 96107      | AGCAGCATTGTACAGGGCTAT    | miRNA    | miR-103a   |
| t0000020 | 20     | 85942      | TAGCAGCACATAATGGTTTG     | miRNA    | miR-15a    |
| t0000021 | 23     | 83980      | AAACCGTTACCATTACTGAGTTT  | miRNA    | miR-451    |
| t0000022 | 24     | 83607      | TACCACAGGGTAGAACCACGGACA | miRNA    | miR-140    |
| t0000023 | 21     | 82545      | TACAGTACTGTGATAACTGAA    | miRNA    | miR-101    |
| t0000024 | 19     | 67329      | TGAGGTAGTAGATTGTATA      | miRNA    | let-7f     |
| t0000025 | 23     | 64574      | AAAAGCTGGGTTGAGAGGGCGAA  | miRNA    | miR-320a   |
| t0000027 | 22     | 62677      | TAGCAGCACATCATGGTTTACA   | miRNA    | miR-15b    |
| t0000028 | 20     | 62631      | AGCAGCATTGTACAGGGCTA     | miRNA    | miR-103a   |
| t0000029 | 19     | 61224      | TAGCAGCACATCATGGTTT      | miRNA    | miR-15b    |
| t0000030 | 20     | 59735      | TAGCAGCACGTAATATTGG      | miRNA    | miR-16     |
| t0000031 | 22     | 57242      | AAAAGCTGGGTTGAGAGGGCGT   | miRNA    | miR-320d   |
| t0000032 | 21     | 56974      | TAGCAGCACATAATGGTTTGT    | miRNA    | miR-15a    |
| t0000033 | 22     | 54332      | ACCACAGGGTAGAACCACGGAC   | miRNA    | miR-140    |
| t0000035 | 20     | 48633      | TGAGGTAGTAGGTTGTGTGG     | miRNA    | let-7b     |
| t0000036 | 22     | 48032      | GTACAGTACTGTGATAACTGAA   | miRNA    | miR-101    |
| t0000037 | 21     | 45445      | AGAGGTAGTAGGTTGCATAGT    | miRNA    | let-7d     |
| t0000038 | 22     | 45353      | ACCACAGGGTAGAACCACGGAA   | miRNA    | miR-140    |
| t0000039 | 22     | 42540      | CAACGGAATCCCAAAGCAGCT    | miRNA    | miR-191    |
| t0000040 | 23     | 40778      | AAAAGCTGGGTTGAGAGGGCGTA  | miRNA    | miR-320d   |
| t0000041 | 22     | 40061      | TGAGGTAGTAGTTTGTGCTGTT   | miRNA    | let-7i     |
| t0000042 | 23     | 39150      | TGAGGTAGTAGATTGTATAGTTA  | miRNA    | let-7f     |
| t0000043 | 23     | 38215      | TCCTGTACTGAGCTGCCCCGAGA  | miRNA    | miR-486-5p |
| t0000044 | 21     | 37910      | CATTGCACTTGTCTCGGTCTG    | miRNA    | miR-25     |
| t0000046 | 23     | 36856      | TGAGGTAGTAGATTGTATAGTTG  | miRNA    | let-7f     |
| t0000047 | 22     | 36486      | TGAGGTAGTAGGTTGTGTGGTA   | miRNA    | let-7b     |
| t0000048 | 21     | 36388      | TGAGGTAGTAGTTTGTACAGT    | miRNA    | let-7g     |
| t0000050 | 23     | 31992      | TGGAGAGAAAGGCAGTTCCTGAT  | miRNA    | miR-185    |
| t0000051 | 23     | 31745      | AAAAGCTGGGTTGAGAGGGCGAT  | miRNA    | miR-320a   |
| t0000052 | 23     | 29970      | TGAGGTAGTAGGTTGTGTGGTTA  | miRNA    | let-7b     |
| t0000053 | 23     | 29284      | TACCACAGGGTAGAACCACGGAT  | miRNA    | miR-140    |
| t0000054 | 20     | 28620      | AGAGGTAGTAGGTTGCATAG     | miRNA    | let-7d     |
| t0000057 | 23     | 28203      | TGAGGGGCAGAGAGCGAGACTTA  | miRNA    | miR-423-5p |
| t0000058 | 20     | 27904      | TACAGTACTGTGATAACTGA     | miRNA    | miR-101    |
| t0000059 | 22     | 24615      | ACCACAGGGTAGAACCACGGAT   | miRNA    | miR-140    |
| t0000060 | 23     | 22675      | AAAAGCTGGGTTGAGAGGGCGTT  | miRNA    | miR-320d   |
| t0000062 | 21     | 22536      | GTACAGTACTGTGATAACTGA    | miRNA    | miR-101    |

|          |    |       |                              |       |             |
|----------|----|-------|------------------------------|-------|-------------|
| t0000063 | 22 | 22438 | TGAGGTAGTAGATTGTATAGTA       | miRNA | let-7f      |
| t0000064 | 23 | 21953 | CAACGGAATCCCAAAAGCAGCTG      | miRNA | miR-191     |
| t0000065 | 20 | 21314 | TGGAGAGAAAGGCAGTTCCT         | miRNA | miR-185     |
| t0000068 | 23 | 19476 | ACCACAGGGTAGAACCACGGACA      | miRNA | miR-140     |
| t0000069 | 24 | 18885 | TGAGGGGCAGAGAGCGAGACTTTT     | miRNA | miR-423-5p  |
| t0000070 | 23 | 17735 | TGAGGTAGTAGATTGTATAGTTT      | miRNA | let-7f      |
| t0000071 | 22 | 17578 | TTCAAGTAATCCAGGATAGGCT       | miRNA | miR-26a     |
| t0000072 | 19 | 17090 | TGAGGTAGTAGGTTGTATA          | miRNA | let-7       |
| t0000073 | 23 | 16862 | TGAGGTAGTAGGTTGTGTGTTT       | miRNA | let-7b      |
| t0000074 | 21 | 16231 | AAAAGCTGGGTTGAGAGGGCG        | miRNA | miR-320a    |
| t0000077 | 23 | 15561 | TAGCAGCACGTAATATTGGCGA       | miRNA | miR-16      |
| t0000078 | 23 | 14898 | TGGAGAGAAAGGCAGTTCCTGAG      | miRNA | miR-185     |
| t0000079 | 23 | 14754 | TGTAGAGCAGGGAGCAGGAAGCT      | miRNA | miR-4732-5p |
| t0000080 | 22 | 13897 | TACAGTACTGTGATAACTGAAG       | miRNA | miR-101     |
| t0000081 | 19 | 13413 | AAACCGTTACCATTACTGA          | miRNA | miR-451     |
| t0000082 | 20 | 13186 | TGAGGTAGTAGTTTGTGCTG         | miRNA | let-7i      |
| t0000083 | 22 | 12124 | TGAGGGAGTAGATTGTATAGTT       | miRNA | miR-1827    |
| t0000085 | 20 | 12041 | TAAAGTGCTGACAGTGCAGA         | miRNA | miR-106b    |
| t0000086 | 21 | 12025 | TGAGGTAGTAGTTTGTGCTGT        | miRNA | let-7i      |
| t0000087 | 19 | 11847 | TAGCAGCACGTAATATTG           | miRNA | miR-16      |
| t0000088 | 20 | 11709 | TCCTGTACTGAGCTGCCCCG         | miRNA | miR-486-5p  |
| t0000089 | 19 | 11611 | TGAGGGGCAGAGAGCGAGA          | miRNA | miR-423-5p  |
| t0000090 | 24 | 11435 | AAACCGTTACCATTACTGAGTTTA     | miRNA | miR-451     |
| t0000091 | 19 | 11343 | TGAGGTAGTAGGTTGTGTG          | miRNA | let-7b      |
| t0000092 | 22 | 11180 | TAGCAGCACATAATGGTTTGTG       | miRNA | miR-15a     |
| t0000093 | 25 | 11066 | AAACCGTTACCATTACTGAGTTTAG    | miRNA | miR-451     |
| t0000095 | 23 | 10487 | TAGCAGCACGTAATATTGGCGT       | miRNA | miR-16      |
| t0000096 | 20 | 10466 | CCCATAAAGTAGAAAGCACT         | miRNA | miR-142     |
| t0000097 | 22 | 10086 | TATTGCACTTGTCCCGCCTGT        | miRNA | miR-92a     |
| t0000098 | 24 | 9701  | TGAGGTAGTAGGTTGTGTGGTTAA     | miRNA | let-7b      |
| t0000099 | 21 | 9389  | TTCAAGTAATTCAGGATAGGT        | miRNA | miR-26b     |
| t0000100 | 18 | 8784  | TACAGTATAGATGATGTA           | miRNA | miR-144     |
| t0000101 | 22 | 8682  | TTCAAGTAATTCAGGATAGGTT       | miRNA | miR-26b     |
| t0000102 | 19 | 8425  | ATCACATTGCCAGGGATTT          | miRNA | miR-23a     |
| t0000103 | 22 | 8231  | TCTCACACAGAAATCGCACCCG       | miRNA | miR-342-3p  |
| t0000104 | 21 | 7940  | TAAAGTGCTGACAGTGCAGAT        | miRNA | miR-106b    |
| t0000105 | 20 | 7897  | TGAGGGGCAGAGAGCGAGAC         | miRNA | miR-423-5p  |
| t0000106 | 22 | 7865  | TGAGGTAGTAGATTGTGTAGTT       | miRNA | let-7f      |
| t0000107 | 21 | 7696  | TACCACAGGGTAGAACCACGG        | miRNA | miR-140     |
| t0000108 | 20 | 7478  | ACCACAGGGTAGAACCACGG         | miRNA | miR-140     |
| t0000109 | 23 | 7074  | TCCTGTACTGAGCTGCCCCGAGT      | miRNA | miR-486-5p  |
| t0000110 | 18 | 6915  | TAGCAGCACATCATGGTT           | miRNA | miR-15b     |
| t0000113 | 21 | 6881  | GAGGTAGTAGATTGTATAGTT        | miRNA | let-7f      |
| t0000115 | 28 | 6816  | AACTTTGAAGACTGAAGTGGAGAAGGGT | miRNA | miR-3526    |
| t0000117 | 23 | 6770  | TCTCACACAGAAATCGCACCCGT      | miRNA | miR-342-3p  |
| t0000118 | 21 | 6745  | TATTGCACTTGTCCCGCCTG         | miRNA | miR-92a     |
| t0000120 | 23 | 6658  | TGAGATGAAGCACTGTAGCTATC      | miRNA | miR-143     |
| t0000121 | 21 | 6629  | AGGTAGATAGAACAGGTCTTG        | miRNA | miR-1839    |
| t0000124 | 22 | 6582  | AACGGAATCCCAAAAGCAGCTG       | miRNA | miR-191     |
| t0000126 | 22 | 6506  | AGCAGCATTGTACAGGGCTATT       | miRNA | miR-107     |
| t0000127 | 21 | 6453  | CTGACCTATGAATTGACAGCC        | miRNA | miR-192     |
| t0000128 | 19 | 6388  | TAGCAGCACATAATGGTTT          | miRNA | miR-15a     |
| t0000129 | 22 | 6379  | AAGGTAGATAGAACAGGTCTTG       | miRNA | miR-1839    |
| t0000131 | 23 | 6357  | TGAAGACTGAAGTGGAGAAGGGT      | miRNA | miR-3526    |
| t0000133 | 23 | 6281  | ACTGGACTTGGAGTCAGAAGGCA      | miRNA | miR-378     |
| t0000134 | 23 | 6179  | AGCAGCATTGTACAGGGCTATGT      | miRNA | miR-103a    |
| t0000135 | 22 | 6062  | TAGCAGCACGTAATATTGTCTG       | miRNA | miR-16      |
| t0000136 | 19 | 6005  | CTACAGTATAGATGATGTA          | miRNA | miR-144     |

|          |    |                                  |       |             |
|----------|----|----------------------------------|-------|-------------|
| t0000137 | 22 | 5670 ATATAATACAACCTGCTAAGTG      | miRNA | miR-374     |
| t0000138 | 21 | 5651 TAGCAGCACATCATGGTTTAC       | miRNA | miR-15b     |
| t0000139 | 22 | 5630 TAGCAGCACGTAATATTGGCA       | miRNA | miR-16b     |
| t0000140 | 24 | 5620 TACCACAGGGTAGAACCACGGACG    | miRNA | miR-140     |
| t0000141 | 23 | 5519 TGAGGTAGTAGGTTGTGTGGTAA     | miRNA | let-7b      |
| t0000143 | 21 | 5417 TGTAGAGCAGGGAGCAGGAAG       | miRNA | miR-4732-5p |
| t0000144 | 24 | 5351 CAACGGAATCCCAAAAGCAGCTGA    | miRNA | miR-191     |
| t0000145 | 23 | 5211 TGAGGTAGTAGGTTGTGTGGTTG     | miRNA | let-7b      |
| t0000146 | 22 | 5200 CAAAGTGCTGTTCGTGCAGGTA      | miRNA | miR-93      |
| t0000148 | 22 | 5090 AAACCTTTACCATTACTGAGTT      | miRNA | miR-451     |
| t0000150 | 27 | 5066 AACTTTGAAGACTGAAGTGGAGAAGGG | miRNA | miR-3526    |
| t0000151 | 20 | 5046 TGAGGTAGTAGATTGTAGTT        | miRNA | let-7f-5p   |
| t0000153 | 26 | 4989 AAACCGTTACCATTACTGAGTTTAGT  | miRNA | miR-451     |
| t0000155 | 20 | 4876 CAACGGAATCCCAAAAGCAG        | miRNA | miR-191     |
| t0000156 | 19 | 4732 TGAGGTAGTAGTTTGTGCT         | miRNA | let-7i      |
| t0000157 | 24 | 4634 TGAGGTAGTAGGTTGTGTGGTTAT    | miRNA | let-7b      |
| t0000158 | 25 | 4528 TGAGGTAGTAGGTTGTATGGTTATC   | miRNA | let-7c      |
| t0000159 | 22 | 4203 TGGAGAGAAAGGAAGTTCCTGA      | miRNA | miR-185     |
| t0000160 | 22 | 4178 TGAGGTAGTAGATTGTATACTT      | miRNA | let-7f      |
| t0000161 | 22 | 4116 AAAAGCTGGGTTGAGAGGGCAA      | miRNA | miR-320b    |
| t0000163 | 23 | 4114 CAAAGTGCTGTTCGTGCAGGTAG     | miRNA | miR-93      |
| t0000164 | 21 | 4050 TAGCTTATCAGACTGATGTTG       | miRNA | miR-21      |
| t0000167 | 22 | 3980 TGAGGTAGTAGATTGTATAGGT      | miRNA | let-7f      |
| t0000168 | 21 | 3944 CCCATAAAGTAGAAAGCACTA       | miRNA | miR-142     |
| t0000169 | 21 | 3932 AAACCTTTACCATTACTGAGT       | miRNA | miR-451     |
| t0000170 | 21 | 3771 TGAGGTAGTAGGTTGTGTGGA       | miRNA | let-7b      |
| t0000171 | 22 | 3690 TACAGTACTGTGATAACTGAAA      | miRNA | miR-101     |
| t0000172 | 23 | 3657 ACCACAGGGTAGAACCACGGACT     | miRNA | miR-140     |
| t0000174 | 22 | 3647 CATTGCACTTGTCTCGGTCTGT      | miRNA | miR-25      |
| t0000177 | 21 | 3631 ACCACAGGGTAGAACTACGGA       | miRNA | miR-140     |
| t0000180 | 22 | 3606 TCCTGTACTGAGCTGCCCGAA       | miRNA | miR-486-5p  |
| t0000182 | 24 | 3591 TGAGGGGCAGAGAGCGAGACTTTA    | miRNA | miR-423-5p  |
| t0000184 | 19 | 3569 AGAGGTAGTAGGTTGCATA         | miRNA | let-7d      |
| t0000185 | 21 | 3531 TGAGGGAGTAGATTGTATAGT       | miRNA | miR-1827    |
| t0000186 | 22 | 3514 TACCACAGGGTAGAACTACGGA      | miRNA | miR-140     |
| t0000187 | 23 | 3491 TACCACAGGGTAGAACCACGGAG     | miRNA | miR-140     |
| t0000188 | 23 | 3484 TGAGGTAGTAGGTTGTATAGTTA     | miRNA | let-7       |
| t0000189 | 22 | 3482 TAGCAGCACGTAATATTGCCG       | miRNA | miR-16      |
| t0000191 | 22 | 3458 TGAGGTGGTAGATTGTATAGTT      | miRNA | let-7f      |
| t0000193 | 22 | 3446 TGAGGTAGTAGATTGTATATTT      | miRNA | let-7f      |
| t0000194 | 23 | 3440 ACCACAGGGTAGAACCACGGACG     | miRNA | miR-140     |
| t0000195 | 20 | 3436 AAAGCTGGGTTGAGAGGGCG        | miRNA | miR-320a    |
| t0000196 | 22 | 3373 TGGAGAGAAAGGCAGTTCCTGT      | miRNA | miR-185     |
| t0000198 | 22 | 3371 TGGAGAGAAAGGCAGTTCCTGC      | miRNA | miR-185     |
| t0000199 | 23 | 3348 TATTGCACTTGTCCCGCCTGTA      | miRNA | miR-92a     |
| t0000201 | 20 | 3343 TGAGGTAGTAGATTGTATTT        | miRNA | let-7f-5p   |
| t0000203 | 22 | 3279 TCTGGGCACAGGCGGATGGACA      | miRNA | miR-5107    |
| t0000204 | 22 | 3190 GGATATCATCATATACTGTAAG      | miRNA | miR-144*    |
| t0000206 | 23 | 3169 AAAAGCTGGGTTGAGAGGGCGAG     | miRNA | miR-320a    |
| t0000207 | 22 | 3168 TACCACAGGGTAGAACCCCGGA      | miRNA | miR-140     |
| t0000208 | 23 | 3124 TGAGGTAGTAGTTTGTGCTGTTT     | miRNA | let-7i      |
| t0000209 | 24 | 3120 TGAAGACTGAAGTGGAGAAGGGTT    | miRNA | miR-3526    |
| t0000210 | 22 | 3117 ACCACAGGGTAGAACCACGGAG      | miRNA | miR-140     |
| t0000211 | 21 | 3105 TGACCTATGAATTGACAGCCA       | miRNA | miR-192     |
| t0000213 | 21 | 3098 AACGGAATCCCAAAAGCAGCT       | miRNA | miR-191     |
| t0000214 | 21 | 3031 CAACGGAATCCCAAAAGCAGC       | miRNA | miR-191     |
| t0000215 | 20 | 3015 CCACAGGGTAGAACCACGGA        | miRNA | miR-140     |
| t0000216 | 18 | 3015 TGAGGTAGTAGATTGTAT          | miRNA | let-7f      |

|          |    |                                |       |             |
|----------|----|--------------------------------|-------|-------------|
| t0000217 | 23 | 2980 TGAGGTAGTAGGTTGTATAGTTG   | miRNA | let-7       |
| t0000219 | 22 | 2974 AGCAGCATTGTACAGGGCTATA    | miRNA | miR-107     |
| t0000220 | 21 | 2971 CAAAGTGCTGTTCTGTCAGGT     | miRNA | miR-93      |
| t0000221 | 20 | 2950 TACAGTATAGATGATGTACT      | miRNA | miR-144     |
| t0000222 | 21 | 2943 TGAGGTAGTAGATTGTATTGT     | miRNA | let-7f      |
| t0000224 | 21 | 2920 TCAGTGCCTACAGAACTTTG      | miRNA | miR-148a    |
| t0000225 | 22 | 2906 TAGCAGCACGTAAATATTGGTG    | miRNA | miR-16      |
| t0000226 | 24 | 2889 TACCACAGGGTAGAACCCACGGAAA | miRNA | miR-140     |
| t0000227 | 21 | 2806 AGCAGCACGTAAATATTGGCG     | miRNA | miR-16      |
| t0000228 | 22 | 2786 CAGTGAATGTAAAAGGGCAT      | miRNA | miR-130a    |
| t0000230 | 22 | 2781 CCTCCACACCCAAGGCTTGCA     | miRNA | miR-532-3p  |
| t0000233 | 23 | 2707 GGATATCATCATATACTGTAAGT   | miRNA | miR-144*    |
| t0000234 | 22 | 2687 TGAGGTAGTAGATTGTATAGTG    | miRNA | let-7f      |
| t0000235 | 22 | 2569 TAGCAGTACGTAAATATTGGCG    | miRNA | miR-16      |
| t0000236 | 22 | 2559 TAGCAGCATGTAATATTGGCG     | miRNA | miR-16      |
| t0000237 | 21 | 2544 TGAGGTAGTAGGTTGTATGGT     | miRNA | let-7c      |
| t0000239 | 22 | 2528 TGAGGTAGTAGGTTGTATAGTA    | miRNA | let-7-5p    |
| t0000240 | 25 | 2526 TGAGATGAAGCACTGTAGCTCTATC | miRNA | miR-143     |
| t0000241 | 21 | 2523 TTCAAGTAATCCAGGATAGGC     | miRNA | miR-26a     |
| t0000242 | 23 | 2513 AACGGAATCCCAAAGCAGCTGA    | miRNA | miR-191     |
| t0000243 | 23 | 2513 TGAGGTAGTAGGTTGTATAGTTT   | miRNA | let-7       |
| t0000245 | 19 | 2488 AGCAGCATTGTACAGGGCT       | miRNA | miR-103a    |
| t0000246 | 19 | 2484 TAGCAGCACATCATGGTTA       | miRNA | miR-15b     |
| t0000247 | 24 | 2482 TGAGGTAGTAGGTTGTGTGGTTAG  | miRNA | let-7b      |
| t0000249 | 21 | 2474 TGAGGTAGTAGATTGTATAGA     | miRNA | let-7f      |
| t0000250 | 23 | 2454 TGAGGTAGTAGGTTGTGTGGTAT   | miRNA | let-7b      |
| t0000253 | 22 | 2389 TGAGGTAGTAGGTTGTATGGTT    | miRNA | let-7c      |
| t0000254 | 21 | 2351 AGGCGGAGACTTGGGCAATTG     | miRNA | miR-25*     |
| t0000256 | 22 | 2334 TGAGGGAGTAGGTTGTGTGGTT    | miRNA | miR-4510    |
| t0000257 | 22 | 2314 AAAAGCTGGGTTGAGAGGGCAT    | miRNA | miR-320d    |
| t0000258 | 22 | 2292 TGAGGAAGTAGATTGTATAGTT    | miRNA | let-7f      |
| t0000259 | 22 | 2276 TGAGGTAGTAGATTGTACAGTT    | miRNA | let-7f      |
| t0000261 | 23 | 2238 AATCTGAGAAGGCGCACAAGGTT   | miRNA | miR-3200-5p |
| t0000262 | 21 | 2229 TAGCAGCACGTAAATATTGCG     | miRNA | miR-16      |
| t0000263 | 25 | 2224 ACTGGACTTGGAGTCAGAAGGCATC | miRNA | miR-378     |
| t0000264 | 23 | 2189 TGAGGGGCAGAGAGCGAGACTTG   | miRNA | miR-423-5p  |
| t0000265 | 21 | 2188 ACTGGACTTGGAGTCAGAAGG     | miRNA | miR-378     |
| t0000267 | 21 | 2181 TAGCAGCACGTAAATATTGGC     | miRNA | miR-16      |
| t0000269 | 20 | 2151 GAGGTAGTAGATTGTATAGT      | miRNA | let-7f      |
| t0000271 | 22 | 2116 TACAGTACTGTGATAACTGACT    | miRNA | miR-101c    |
| t0000273 | 21 | 2115 AAAGCTGGGTTGAGAGGGCGA     | miRNA | miR-320a    |
| t0000275 | 22 | 2105 TAGCTTATCAGACTGATGTTGA    | miRNA | miR-21      |
| t0000277 | 23 | 2101 TGGCTCAGTTCAGCAGGAACAGT   | miRNA | miR-24      |
| t0000278 | 22 | 2092 TGAGGCAGTAGATTGTATAGTT    | miRNA | let-7f      |
| t0000279 | 23 | 2077 TGAGGTAGTAGTTTGTACAGTTA   | miRNA | let-7g      |
| t0000282 | 20 | 2055 TGACCTATGAATTGACAGCC      | miRNA | miR-192     |
| t0000283 | 20 | 2011 TATTGCACTTGTCCCGGCCT      | miRNA | miR-92a     |
| t0000284 | 19 | 2007 TGGAGAGAAAGGCAGTTGA       | miRNA | miR-185     |
| t0000285 | 22 | 1982 TGAGGTAGTAGATTGTATTGTT    | miRNA | let-7f      |
| t0000286 | 24 | 1979 CAACGGAATCCCAAAGCAGCTGT   | miRNA | miR-191     |
| t0000287 | 25 | 1924 TGGAATGTAAGGAAGTGTGTGGATC | miRNA | miR-206     |
| t0000288 | 20 | 1923 CCGCACTGTGGGTTACTTGCT     | miRNA | miR-106b*   |
| t0000289 | 21 | 1914 AAACCGTTACCATTATTGAGT     | miRNA | miR-451     |
| t0000290 | 21 | 1907 TGAGGTAGTAGATTGTGTAGT     | miRNA | let-7f      |
| t0000291 | 21 | 1888 GGATATCATCATATACTGTAA     | miRNA | miR-144*    |
| t0000292 | 22 | 1881 CGAGGTAGTAGATTGTATAGTT    | miRNA | let-7f      |
| t0000293 | 20 | 1880 TGAGGGAGTAGATTGTATAG      | miRNA | miR-1827    |
| t0000295 | 20 | 1874 TGAGGTAGTAGTTTGTACAG      | miRNA | let-7g      |



|          |    |      |                              |       |             |
|----------|----|------|------------------------------|-------|-------------|
| t0000296 | 22 | 1869 | TGGGGTAGTAGATTGTATAGTT       | miRNA | let-7f      |
| t0000297 | 21 | 1841 | TTATAAAGCAATGAGACTGAT        | miRNA | miR-340-5p  |
| t0000298 | 23 | 1836 | AAACCTTTACCATTACTGAGTTT      | miRNA | miR-451     |
| t0000299 | 20 | 1826 | TGAGGTAGTAGATTGTGTAG         | miRNA | let-7f      |
| t0000300 | 22 | 1806 | TGAGGTAGTAGATTGCATAGTT       | miRNA | let-7f      |
| t0000301 | 23 | 1794 | TGAGGTAGTAGTTTGTGCTGTTA      | miRNA | let-7i      |
| t0000303 | 20 | 1789 | ATCACATTGCCAGGGATTTTC        | miRNA | miR-23a     |
| t0000304 | 22 | 1786 | TAGCAGCACGTAATATTGGAG        | miRNA | miR-16      |
| t0000305 | 24 | 1774 | TCTCACACAGAAATCGCACCCGTC     | miRNA | miR-342-3p  |
| t0000307 | 22 | 1767 | TGAGGTAGTAGATTGTATAGCT       | miRNA | let-7f      |
| t0000308 | 23 | 1764 | ACCACAGGGTAGAACCACGGAAA      | miRNA | miR-140     |
| t0000309 | 24 | 1742 | TAGCAGCACGTAATATTGGCGAA      | miRNA | miR-16      |
| t0000310 | 22 | 1733 | TACAGTACTGTGATAACTGAAT       | miRNA | miR-101     |
| t0000311 | 21 | 1710 | TCAGTGCATCACAGAACTTTG        | miRNA | miR-148b-3p |
| t0000313 | 20 | 1710 | GGATATCATCATATACTGTA         | miRNA | miR-144*    |
| t0000314 | 22 | 1709 | TGAGGTAGTAGGTTGTGTGGAA       | miRNA | let-7b      |
| t0000316 | 22 | 1692 | AACATTC AACGCTGTCGGTGAG      | miRNA | miR-181a    |
| t0000317 | 22 | 1688 | TAAAGTGCTGACAGTGCAGATA       | miRNA | miR-106b    |
| t0000319 | 21 | 1678 | AGCAGCATTGTACAGGGCTAA        | miRNA | miR-103a    |
| t0000321 | 24 | 1672 | AGCAGCATTGTACAGGGCTATGAT     | miRNA | miR-103a    |
| t0000322 | 22 | 1666 | TTAGGTAGTAGATTGTATAGTT       | miRNA | let-7f      |
| t0000323 | 22 | 1659 | TAGCAGCACGTAATATTGGCT        | miRNA | miR-16b     |
| t0000324 | 24 | 1645 | TTGAAGACTGAAGTGGAGAAGGGT     | miRNA | miR-3526    |
| t0000325 | 22 | 1645 | TTCAAGTAATCCAGGATAGGCA       | miRNA | miR-26a     |
| t0000326 | 23 | 1644 | ATAGCAGCACGTAATATTGGCG       | miRNA | miR-16      |
| t0000327 | 22 | 1641 | TGAGGTAGCAGATTGTATAGTT       | miRNA | let-7f      |
| t0000329 | 23 | 1627 | TGACCTATGAATTGACAGCCAGA      | miRNA | miR-192     |
| t0000330 | 22 | 1614 | TGAGGTAGGAGATTGTATAGTT       | miRNA | let-7e      |
| t0000331 | 19 | 1611 | TGAGGTAGTAGATTGTAGT          | miRNA | let-7f      |
| t0000334 | 22 | 1610 | AAACCGTTACCATTATTGAGTT       | miRNA | miR-451     |
| t0000336 | 22 | 1609 | TGGAGAGAAAGGCAGTTTCTGA       | miRNA | miR-185     |
| t0000337 | 25 | 1580 | TGAGGTAGTAGGTTGTGTGGTTATC    | miRNA | let-7b      |
| t0000338 | 22 | 1564 | TGAGGTAGTAGTTTGTATAGTT       | miRNA | let-7f      |
| t0000339 | 24 | 1554 | TACCACAGGGTAGAACCACGGACT     | miRNA | miR-140     |
| t0000340 | 29 | 1503 | AACTTTGAAGACTGAAGTGGAGAAGGGT | miRNA | miR-3526    |
| t0000341 | 24 | 1501 | AAAAGCTGGGTTGAGAGGGCGAAA     | miRNA | miR-320a    |
| t0000342 | 22 | 1493 | TGAGGTAGTGGATTGTATAGTT       | miRNA | let-7f-5p   |
| t0000343 | 22 | 1490 | TGAAGACTGAAGTGGAGAAGGG       | miRNA | miR-3526    |
| t0000344 | 19 | 1485 | TGGAGAGAAAGGCAGTTCC          | miRNA | miR-185     |
| t0000346 | 25 | 1472 | TGAAGACTGAAGTGGAGAAGGGTTT    | miRNA | miR-3526    |
| t0000347 | 18 | 1470 | TGAGGTAGTAGGTTGTGT           | miRNA | let-7b      |
| t0000348 | 24 | 1445 | TGGAGAGAAAGGCAGTTCCTGAAA     | miRNA | miR-185     |
| t0000349 | 18 | 1438 | TGAGGTAGTAGATTGTAG           | miRNA | let-7f      |
| t0000350 | 23 | 1434 | CAAAGTGCTTACAGTGCAGGTAG      | miRNA | miR-17      |
| t0000353 | 26 | 1433 | AACTTTGAAGACTGAAGTGGAGAAGG   | miRNA | miR-3526    |
| t0000354 | 21 | 1424 | TGAGGGCAGAGAGCGAGACA         | miRNA | miR-423-5p  |
| t0000356 | 22 | 1422 | AGAGGTAGTAGGTTGCATAGTA       | miRNA | let-7d      |
| t0000358 | 22 | 1421 | TGGCTCAGTTCAGCAGGAACAG       | miRNA | miR-24      |
| t0000360 | 21 | 1415 | CAGCAGCAATTCATGTTTTGA        | miRNA | miR-424     |
| t0000361 | 22 | 1415 | TGAGGTAGTAGATTGTATGGTT       | miRNA | let-7f      |
| t0000362 | 21 | 1384 | TGAGGTGGTAGATTGTATAGT        | miRNA | let-7f      |
| t0000364 | 21 | 1381 | AAAAGTGCTTACAGTGCAGGT        | miRNA | miR-106     |
| t0000366 | 21 | 1375 | TGAGGGAGTAGGTTGTGTGGT        | miRNA | miR-4510    |
| t0000368 | 22 | 1374 | CTGACCTATGAATTGACAGCCA       | miRNA | miR-192     |
| t0000369 | 23 | 1373 | TGAGGTAGTAGATTGTATAGTAA      | miRNA | let-7f      |
| t0000370 | 21 | 1368 | TGAGGTAGTAGGTTGTGTGTT        | miRNA | let-7b      |
| t0000371 | 21 | 1364 | AACTTTGAAGACTGAAGTGGA        | miRNA | miR-3526    |
| t0000372 | 18 | 1353 | TAGCAGCACATAATGGTT           | miRNA | miR-15a     |

|          |    |      |                            |       |             |
|----------|----|------|----------------------------|-------|-------------|
| t0000375 | 24 | 1349 | TGAGGTAGTAGATTGTATAGTTAA   | miRNA | let-7f      |
| t0000376 | 22 | 1347 | TGAGGTAGTAGGTTGTGTAGTT     | miRNA | let-7b      |
| t0000377 | 24 | 1331 | AAAAGCTGGGTTGAGAGGGCGAAT   | miRNA | miR-320a    |
| t0000379 | 23 | 1327 | TACCACAGGGTAGAACCCCGGAC    | miRNA | miR-140     |
| t0000378 | 21 | 1327 | ACCACAGGGTAGAATCACGGA      | miRNA | miR-140     |
| t0000381 | 24 | 1317 | TGAGGGGCAGAGAGCGAGACTTAA   | miRNA | miR-423-5p  |
| t0000382 | 18 | 1312 | AAACCGTTACCATTACTG         | miRNA | miR-451     |
| t0000384 | 18 | 1308 | TGAGGTAGTAGGTTGTAT         | miRNA | let-7       |
| t0000385 | 22 | 1307 | TCTTGTACTGAGCTGCCCCGAG     | miRNA | miR-486-5p  |
| t0000386 | 23 | 1305 | TGAGGGGCAGAGAGCGAGAATTT    | miRNA | miR-423-5p  |
| t0000387 | 21 | 1291 | TGAGGTAGTAGATTGTATATT      | miRNA | let-7f      |
| t0000388 | 22 | 1290 | TACCACAGGGTAGAACACGGC      | miRNA | miR-140     |
| t0000389 | 21 | 1287 | TAGCAGCACGTAATATTGGA       | miRNA | miR-16      |
| t0000391 | 21 | 1283 | AAAAGCTGGGTTGAGAGGGCA      | miRNA | miR-320b    |
| t0000392 | 22 | 1283 | AAAAGTGCTTACAGTGCAGGTA     | miRNA | miR-106     |
| t0000394 | 21 | 1278 | TCTCCAACCCTTGTACCAGT       | miRNA | miR-150     |
| t0000395 | 22 | 1276 | CAGTGCAATGATGAAAGGGCAT     | miRNA | miR-130b    |
| t0000396 | 20 | 1273 | AAACCTTTACCATTACTGAG       | miRNA | miR-451     |
| t0000398 | 21 | 1263 | AAAGCTGGGTTGAGAGGGCGT      | miRNA | miR-320d    |
| t0000399 | 22 | 1261 | TACGTCATCGTTGTCATCGTCA     | miRNA | miR-598     |
| t0000400 | 21 | 1243 | CAGTGCAATGTTAAAAGGGCA      | miRNA | miR-130a    |
| t0000401 | 26 | 1236 | TAGCTTATCAGACTGATGTTGACATC | miRNA | miR-21      |
| t0000402 | 24 | 1234 | TGAGGTAGTAGGTTGTATGGTATC   | miRNA | let-7-5p    |
| t0000403 | 23 | 1209 | GTACAGTACTGTGATAACTGAAA    | miRNA | miR-101     |
| t0000404 | 22 | 1189 | TGAGGTAGTAGATTGTTTAGTT     | miRNA | let-7f      |
| t0000405 | 22 | 1187 | TGTAGAGCAGGGAGCAGGAAGC     | miRNA | miR-4732-5p |
| t0000406 | 22 | 1178 | AGGTAGATAGAACAGGTCTTGT     | miRNA | miR-1839    |
| t0000407 | 23 | 1177 | TACCACAGGGTAGAACACGGCC     | miRNA | miR-140     |
| t0000408 | 22 | 1176 | TGATGTAGTAGATTGTATAGTT     | miRNA | let-7f      |
| t0000409 | 22 | 1174 | TCTCCAACCCTTGTACCAGTG      | miRNA | miR-150     |
| t0000412 | 21 | 1173 | ATATAATACAACCTGCTAAGT      | miRNA | miR-374     |
| t0000413 | 22 | 1170 | TACCGCACTGTGGGTA CTTGCT    | miRNA | miR-106b*   |
| t0000414 | 22 | 1168 | TGAGGTAGTAGCTTGTATAGTT     | miRNA | let-7f      |
| t0000415 | 18 | 1166 | AGCAGCATTGTACAGGGC         | miRNA | miR-103a    |
| t0000416 | 23 | 1161 | GAAGACTGAAGTGGAGAAGGGTT    | miRNA | miR-739     |
| t0000417 | 22 | 1155 | TCCTGTACTGAGCTGTCCCGAG     | miRNA | miR-486-5p  |
| t0000419 | 22 | 1140 | TGAGGTAGTAGATCGTATAGTT     | miRNA | let-7f      |
| t0000420 | 24 | 1135 | AGCAGCATTGTACAGGGCTATGAA   | miRNA | miR-103a    |
| t0000421 | 20 | 1122 | CTGACCTATGAATTGACAGC       | miRNA | miR-192     |
| t0000423 | 21 | 1121 | CAAAGTGCTTACAGTGCAGGT      | miRNA | miR-17      |
| t0000424 | 21 | 1120 | AAACCGTTACCATTACTTAGT      | miRNA | miR-451     |
| t0000426 | 20 | 1116 | TAGCAGCACGTAATATTCG        | miRNA | miR-16      |
| t0000427 | 21 | 1106 | TGAGGTAGTAGATTGTACAGT      | miRNA | let-7f      |
| t0000428 | 22 | 1104 | CAAAGTGCTTACAGTGCAGGTA     | miRNA | miR-17      |
| t0000429 | 23 | 1103 | TGAGGGGCAGAGAGCGAGACTAA    | miRNA | miR-423-5p  |
| t0000430 | 20 | 1099 | ATCACATTGCCAGGGATTTA       | miRNA | miR-23a     |
| t0000432 | 23 | 1080 | CATTGCACTTGTCTCGGTCTGAA    | miRNA | miR-25      |
| t0000433 | 22 | 1076 | TGAGGTAGTAGGTTGTGGGGTT     | miRNA | let-7b      |
| t0000434 | 22 | 1070 | TATTGCACTTGTCCCGGCCTGA     | miRNA | miR-92b-3p  |
| t0000435 | 23 | 1069 | AGAGGTAGTAGGTTGCATAGTTA    | miRNA | let-7d      |
| t0000436 | 25 | 1066 | TGGAATGTAAAGAAGTGTATATC    | miRNA | miR-1       |
| t0000439 | 19 | 1064 | TGTGAGGTTGGCATTGTTG        | miRNA | miR-1294    |
| t0000440 | 24 | 1060 | TCCTGTACTGAGCTGCCCCGAGAA   | miRNA | miR-486-5p  |
| t0000441 | 22 | 1059 | TGAGGTACTAGATTGTATAGTT     | miRNA | let-7f      |
| t0000442 | 26 | 1052 | TGTAACATCCTCGACTGGAAGCATC  | miRNA | miR-30a-5p  |
| t0000443 | 21 | 1052 | GTAGTGTTCCTACTTTATGG       | miRNA | miR-142-3p  |
| t0000444 | 22 | 1049 | TCCTGTACTGAGCTGCCCCGAT     | miRNA | miR-486-5p  |
| t0000445 | 22 | 1048 | TAAGGTAGTAGATTGTATAGTT     | miRNA | let-7f      |

|          |    |      |                           |       |             |
|----------|----|------|---------------------------|-------|-------------|
| t0000447 | 23 | 1039 | AGAGGTAGTAGGTTGCATAGTTT   | miRNA | let-7d      |
| t0000450 | 20 | 1027 | AGGGACGGGACGCGGTGCAG      | miRNA | miR-92b*    |
| t0000451 | 21 | 1025 | TAAAGTGCTGACAGTGCAGAA     | miRNA | miR-106b    |
| t0000453 | 22 | 1015 | TGAGGTAGTAGTTTGTACAGTA    | miRNA | let-7g      |
| t0000454 | 22 | 1002 | GTAGTGTTCCTACTTTATGGA     | miRNA | miR-142-3p  |
| t0000455 | 22 | 993  | TGAGGTAGTAGACTGTATAGTT    | miRNA | let-7f      |
| t0000456 | 21 | 992  | TGGCTCAGTTCAGCAGGAACA     | miRNA | miR-24      |
| t0000458 | 23 | 989  | TGAGGGGCAGAGAGCGAGATTTT   | miRNA | miR-423-5p  |
| t0000459 | 21 | 985  | TTGAGGTAGTAGATTGTATAG     | miRNA | let-7f      |
| t0000461 | 22 | 984  | AAAAGCTGGGTTGAGAGGGCGG    | miRNA | miR-320d    |
| t0000462 | 22 | 983  | TACCACAGGGTAGAACCACGGT    | miRNA | miR-140     |
| t0000463 | 23 | 975  | AAACCGTTACCATTACTGAGTTA   | miRNA | miR-451     |
| t0000464 | 23 | 974  | AAACCGTTACCATTACTGAGTAA   | miRNA | miR-451     |
| t0000465 | 18 | 973  | TGGAGAGAAAGGCAGTTG        | miRNA | miR-185     |
| t0000466 | 23 | 970  | TGACCTATGAATTGACAGCCAGT   | miRNA | miR-192     |
| t0000467 | 21 | 970  | TAGCAGCACATCATGGTTTAA     | miRNA | miR-15b     |
| t0000468 | 21 | 969  | TTATGGTTTTGCCTGGGACTGA    | miRNA | miR-584     |
| t0000470 | 23 | 966  | TGTAGAGCAGGGAGCAGGAAGCA   | miRNA | miR-4732-5p |
| t0000473 | 20 | 965  | TGAGGTAGTAGATTGTATGT      | miRNA | let-7f-5p   |
| t0000475 | 20 | 964  | CATTGCACTTGTCTCGGTCT      | miRNA | miR-25      |
| t0000476 | 22 | 961  | GAAGACTGAAGTGGAGAAGGGT    | miRNA | miR-739     |
| t0000478 | 22 | 958  | AATTGCACGGTATCCATCTGTA    | miRNA | miR-363     |
| t0000479 | 19 | 958  | TACAGTATAGATGATGTAA       | miRNA | miR-144     |
| t0000480 | 22 | 953  | AGGGACGGGACGCGGTGCAGTG    | miRNA | miR-92b*    |
| t0000481 | 23 | 952  | AATGACACGATCACTCCCGTTGA   | miRNA | miR-425     |
| t0000482 | 22 | 949  | TGTAAACATCCTACACTCAGCT    | miRNA | miR-30b     |
| t0000483 | 22 | 948  | TTATAAAGCAATGAGACTGATT    | miRNA | miR-340-5p  |
| t0000485 | 24 | 947  | TGAGGTAGTAGGTTGTGTGGTTGA  | miRNA | let-7b      |
| t0000484 | 18 | 945  | TGAGGGGCAGAGAGCGAG        | miRNA | miR-423-5p  |
| t0000486 | 21 | 944  | AGCTACATCTGGCTACTGGGT     | miRNA | miR-222     |
| t0000487 | 22 | 939  | TGAGGGGAGTAGGTTGTATAGTT   | miRNA | miR-1827    |
| t0000488 | 23 | 937  | TGAGGGGCAGATAGCGAGACTTT   | miRNA | miR-423-5p  |
| t0000489 | 25 | 934  | TGGAATGTAAAGAAGTGTGTACATC | miRNA | miR-1       |
| t0000491 | 22 | 927  | TTTGGCAATGGTAGAACTCACA    | miRNA | miR-182     |
| t0000493 | 24 | 924  | TGTAGAGCAGGGAGCAGGAAGCTG  | miRNA | miR-4732-5p |
| t0000492 | 22 | 924  | AAACCGTTACCATTACTTAGTT    | miRNA | miR-451     |
| t0000494 | 24 | 920  | CAAAGTGCTTACAGTGCAGGTAGA  | miRNA | miR-17      |
| t0000496 | 22 | 919  | TGGAGAGAAAGGCAGTTACTGA    | miRNA | miR-185     |
| t0000498 | 20 | 917  | AACATTCAACGCTGTCGGTG      | miRNA | miR-181a    |
| t0000499 | 20 | 917  | TAGCAGCACATCATGGGTTA      | miRNA | miR-15b     |
| t0000500 | 24 | 911  | TGTAAACATCCCCGACTGGAAGCT  | miRNA | miR-30d     |
| t0000503 | 22 | 907  | TAGCAGCACGTAATATTGGCC     | miRNA | miR-16b     |
| t0000504 | 22 | 904  | AAAAGCTGGGTTGAGAGGGCGC    | miRNA | miR-320d    |
| t0000505 | 22 | 903  | TGGAGAGAAAGGCAGTTCCTTA    | miRNA | miR-185     |
| t0000506 | 21 | 899  | CTGACCTATGAATTGACAGCA     | miRNA | miR-192     |
| t0000507 | 22 | 893  | TGCGGTAGTAGATTGTATAGTT    | miRNA | let-7f      |
| t0000510 | 21 | 893  | TGAGGTAGTAGATTGCATAGT     | miRNA | let-7f      |
| t0000512 | 22 | 886  | AAACCGTTACCATTACTCAGTT    | miRNA | miR-451     |
| t0000511 | 25 | 882  | TTGAAGACTGAAGTGGAGAAGGGTT | miRNA | miR-3526    |
| t0000513 | 22 | 881  | TCCTGTA CTGAGCTGCCCGCG    | miRNA | miR-486-5p  |
| t0000514 | 21 | 875  | TACAGTATAGATGATGTACTA     | miRNA | miR-144     |
| t0000515 | 22 | 875  | TGAGGTAGTAGATTGAATAGTT    | miRNA | let-7k      |
| t0000516 | 21 | 873  | TGAGGTAGTAGGTTGTGGGGT     | miRNA | let-7b      |
| t0000517 | 22 | 871  | TGAGGTAGTAGATTATATAGTT    | miRNA | let-7f      |
| t0000519 | 22 | 866  | TGGAGAGAAAGGCAGTTCCTGA    | miRNA | miR-185     |
| t0000520 | 20 | 866  | ACTCGGCGTGGCGTCGGTCG      | miRNA | miR-1307    |
| t0000521 | 19 | 861  | CATAAAGTAGAAAGCACTA       | miRNA | miR-142-5p  |
| t0000524 | 22 | 859  | TAGCACCATTTGAAATCGGTTA    | miRNA | miR-29c     |

|          |    |                                 |       |            |
|----------|----|---------------------------------|-------|------------|
| t0000528 | 21 | 856 ACCACAGGGTAGAACCACGGC       | miRNA | miR-140    |
| t0000529 | 21 | 853 TCTTGTACTGAGCTGCCCCGA       | miRNA | miR-486-5p |
| t0000532 | 23 | 852 ACCACAGGGTAGAACCACGGATA     | miRNA | miR-140    |
| t0000534 | 23 | 852 ACCACAGGGTAGAACCACGGAAG     | miRNA | miR-140    |
| t0000535 | 21 | 852 TGAGGTAGTAGATTGTATAGG       | miRNA | let-7f     |
| t0000538 | 22 | 848 TGAGGTAGTAGATTGTATAGAT      | miRNA | let-7f     |
| t0000537 | 19 | 843 ATCACATTGCCAGGGATTA         | miRNA | miR-23b    |
| t0000540 | 22 | 843 ATCACATTGCCAGGGATTTCCA      | miRNA | miR-23a    |
| t0000541 | 24 | 843 TACCACAGGGTAGAACCACGGAAT    | miRNA | miR-140    |
| t0000544 | 25 | 834 TGAGGTAGTAGGTTGTATAGTTATC   | miRNA | let-7      |
| t0000543 | 19 | 829 TATTGCACTTGTCCCGGCC         | miRNA | miR-92a    |
| t0000545 | 23 | 829 AAAAGCTGGGTTGAGAGGGCGGA     | miRNA | miR-320d   |
| t0000548 | 22 | 827 TGAGGTAGAAGATTGTATAGTT      | miRNA | let-7f     |
| t0000549 | 19 | 824 TAGCAGCACATAATGGTTG         | miRNA | miR-15a    |
| t0000550 | 20 | 816 TTCAAGTAATCCAGGATAGG        | miRNA | miR-26a    |
| t0000552 | 21 | 816 TGAGGTAGTAGATTGTATGTT       | miRNA | let-7f-5p  |
| t0000553 | 19 | 815 TACAGTACTGTGATAACTG         | miRNA | miR-101    |
| t0000551 | 22 | 811 TGAGGTAGTAGATTCTATAGTT      | miRNA | let-7f     |
| t0000554 | 23 | 805 AAAAGTGCTTACAGTGCAGGTAG     | miRNA | miR-106    |
| t0000557 | 22 | 803 TAAAGTGCTTATAGTGCAGGTA      | miRNA | miR-20     |
| t0000556 | 22 | 801 TAGAAGCACGTAATATTGGCG       | miRNA | miR-16     |
| t0000558 | 22 | 799 CTGGA CTGGAGTCAGAAGGCA      | miRNA | miR-378    |
| t0000561 | 22 | 797 TAGTAGCACGTAATATTGGCG       | miRNA | miR-16     |
| t0000563 | 25 | 790 ATGACCTATGATTTGACAGACAATC   | miRNA | miR-215    |
| t0000564 | 22 | 776 ACTGGACTTGGAGTCAGAAGGC      | miRNA | miR-378    |
| t0000567 | 23 | 775 TGAGGGGCAGAGAGAGAGACTTT     | miRNA | miR-423-5p |
| t0000568 | 24 | 773 TAGCAGCACGTAATATTGGCGTA     | miRNA | miR-16     |
| t0000569 | 23 | 771 TGAGGTAGTAGGTTGTGTGGTAG     | miRNA | let-7b     |
| t0000570 | 21 | 768 CGAGGTAGTAGATTGTATAGT       | miRNA | let-7f     |
| t0000571 | 21 | 768 TGAGGCAGTAGATTGTATAGT       | miRNA | let-7f     |
| t0000573 | 22 | 765 TGAGGTAGTAGATTGTATAGTC      | miRNA | let-7f     |
| t0000576 | 22 | 754 AAAGCTGGGTTGAGAGGGCGAA      | miRNA | miR-320a   |
| t0000577 | 23 | 750 TGAGGGGCAGAGAGCGAGCCTTT     | miRNA | miR-423-5p |
| t0000578 | 22 | 746 TAGCAGCACGTAATATTTGCG       | miRNA | miR-16     |
| t0000579 | 22 | 745 TGAGGGGCAGAGAGCGAGACTA      | miRNA | miR-423-5p |
| t0000580 | 22 | 739 TAGCAGAACGTAATATTGGCG       | miRNA | miR-16     |
| t0000583 | 21 | 733 TGAGGGAGTAGGTTGTATAGT       | miRNA | miR-1827   |
| t0000589 | 21 | 731 TGAGGTAGTAGGTTGTGTAGT       | miRNA | let-7b     |
| t0000590 | 24 | 730 AAAAGCTGGGTTGAGAGGGCGATT    | miRNA | miR-320a   |
| t0000591 | 21 | 729 TGAGGAAGTAGATTGTATAGT       | miRNA | let-7f     |
| t0000593 | 21 | 723 TGGAGAGAAAGGAAGTTCCTG       | miRNA | miR-185    |
| t0000594 | 20 | 722 TTATAAAGCAATGAGACTGA        | miRNA | miR-340-5p |
| t0000595 | 21 | 721 AAACCGTTACCATTACTCAGT       | miRNA | miR-451    |
| t0000597 | 22 | 721 TGGAGAGAAAGGCATTTCTGA       | miRNA | miR-185    |
| t0000599 | 24 | 717 TGAGGTAGTAGATTGTATAGTTGA    | miRNA | let-7f     |
| t0000600 | 21 | 708 ACCACAGTGTAGAACCACGGA       | miRNA | miR-140    |
| t0000601 | 22 | 707 TGAGGTAGTAGGGTGTGTGGTT      | miRNA | let-7b     |
| t0000602 | 23 | 704 TGAGGGGCAGAGAGCTAGACTTT     | miRNA | miR-423-5p |
| t0000603 | 22 | 704 TCTGGGAGGTTGTAGCAGTGGA      | miRNA | miR-3192   |
| t0000604 | 21 | 702 CAGTGCAATGATGAAAGGGCA       | miRNA | miR-130b   |
| t0000605 | 22 | 702 TGAGGTAGTAGGTTGTGCGGTT      | miRNA | let-7b     |
| t0000606 | 23 | 701 GAAAAGCTGGGTTGAGAGGGCGA     | miRNA | miR-320a   |
| t0000607 | 20 | 700 AAACCGTTACCATTATTGAG        | miRNA | miR-451    |
| t0000611 | 26 | 699 TGTA AACATCCCCGACTGGAAGCATC | miRNA | miR-30a-5p |
| t0000612 | 23 | 699 TACCACAGGGTAGAACCCCGGAA     | miRNA | miR-140    |
| t0000613 | 21 | 696 AAACCTTACCATTACTGAGTT       | miRNA | miR-451    |
| t0000614 | 25 | 695 TGGAATGTAAAGAAGTATGTATATC   | miRNA | miR-1a     |
| t0000615 | 22 | 690 TGAGGTATTAGATTGTATAGTT      | miRNA | let-7f     |

|          |    |                                |       |            |
|----------|----|--------------------------------|-------|------------|
| t0000616 | 23 | 685 TGAGGTAGTAGTTTGTACAGTTG    | miRNA | let-7g     |
| t0000617 | 19 | 682 AACATTC AACGCTGTCGGT       | miRNA | miR-181a   |
| t0000618 | 22 | 679 AAAGCTGGGTTGAGAGGGCGTA     | miRNA | miR-320d   |
| t0000619 | 22 | 676 TAGCATCACGTA AATATTGGCG    | miRNA | miR-16     |
| t0000620 | 22 | 676 TGAGGTAGTAGATTG TAAAGTT    | miRNA | let-7f     |
| t0000621 | 22 | 676 TGAGGTAGTAGGTTGTGTGTTT     | miRNA | let-7b     |
| t0000622 | 22 | 675 TTGAGGTAGTAGATTGTATAGT     | miRNA | let-7f     |
| t0000623 | 24 | 675 TGAGGTAGTAGGTTGTGTGGTATC   | miRNA | let-7b     |
| t0000624 | 19 | 671 TGAGGTAGTAGATTGTATT        | miRNA | let-7f     |
| t0000625 | 24 | 670 TACCACAGGGTAGA ACCCCGGACA  | miRNA | miR-140    |
| t0000626 | 21 | 668 ACCACAGGGTAGA ACAACGGA     | miRNA | miR-140    |
| t0000627 | 22 | 665 TCCTGTACTGAGCTG TCCGAG     | miRNA | miR-486-5p |
| t0000630 | 22 | 661 ACCACAGGGTAGA ATCACGGAC    | miRNA | miR-140    |
| t0000633 | 22 | 661 TGAGGTAGTAGATTGTATCGTT     | miRNA | let-7f     |
| t0000634 | 22 | 660 AAAGCTGGGTTGAGAGGGCGAT     | miRNA | miR-320a   |
| t0000635 | 23 | 658 AGAGGTAGTAGGTTGCATAGTTG    | miRNA | let-7d     |
| t0000637 | 20 | 657 TATTGCACTCGTCC CGGCCA      | miRNA | miR-92     |
| t0000638 | 22 | 654 TTGGGGAAACG GCCGCTGAGTG    | miRNA | miR-2110   |
| t0000636 | 23 | 652 TATTGCACTTGTCC CGCCTGTT    | miRNA | miR-92a    |
| t0000639 | 21 | 652 TGAGGTAGTAGATCGTATAGT      | miRNA | let-7f     |
| t0000640 | 22 | 649 AAAAGTTGGGTTGAGAGGGCGA     | miRNA | miR-320a   |
| t0000644 | 23 | 648 TGAGGTAGTAGGTTGTATGGATC    | miRNA | let-7b     |
| t0000645 | 21 | 647 TGAGGTAGTAGTTTGTATAGT      | miRNA | let-7f     |
| t0000646 | 20 | 646 TGAGGTAGTAGGTTGTGTGA       | miRNA | let-7b     |
| t0000649 | 24 | 641 TCCTGTACTGAGCTG CCCCCGAGAT | miRNA | miR-486-5p |
| t0000652 | 21 | 641 TGAGGGGCAGAGAGAGAGACT      | miRNA | miR-423-5p |
| t0000650 | 21 | 640 TACAGTACTGTGATA AACTGAT    | miRNA | miR-101c   |
| t0000654 | 21 | 631 TCCTGTACTGAGCTG CTCCGA     | miRNA | miR-486-5p |
| t0000656 | 22 | 630 TACCACAGGGTAGA ATCACGGA    | miRNA | miR-140    |
| t0000657 | 23 | 629 TGAGGTAGTAGTTTGTGCTGTTG    | miRNA | let-7i     |
| t0000659 | 25 | 629 TGAGGTAGTAGGTTGTGTGGTTAGA  | miRNA | let-7b     |
| t0000661 | 23 | 626 TGAGGGGCAGACAG CAGACTTT    | miRNA | miR-423-5p |
| t0000660 | 22 | 625 AAACCCTTACCATT ACTGAGTT    | miRNA | miR-451    |
| t0000664 | 19 | 622 CATTGCACTTGTCT CGGTC       | miRNA | miR-25     |
| t0000665 | 20 | 621 TAGCAGCATATCAT GGTTTA      | miRNA | miR-15b    |
| t0000666 | 23 | 618 TACAGTACTGTGATA AACTGAAGA  | miRNA | miR-101    |
| t0000668 | 22 | 617 TGAGGTAATAGATTGTATAGTT     | miRNA | let-7f     |
| t0000671 | 19 | 616 TCCTGTACTGAGCTG CCCC       | miRNA | miR-486-5p |
| t0000672 | 21 | 614 AGGGGCAGAGAGCG AGACTTT     | miRNA | miR-423-5p |
| t0000673 | 21 | 614 TAGCAGCACATCAT GGTTACA     | miRNA | miR-15b    |
| t0000677 | 22 | 614 TGAGTTAGTAGTTTGTACAGTT     | miRNA | let-7g     |
| t0000678 | 23 | 613 AGGCGGAGACTTGG GCAATTGCT   | miRNA | miR-25*    |
| t0000681 | 22 | 611 TAGCAGCACGCAA ATATTGGCG    | miRNA | miR-16     |
| t0000680 | 22 | 611 TGAGGTAGTATATTGTATAGTT     | miRNA | let-7f     |
| t0000682 | 18 | 608 TGGAGAGAAAGGCAGTTC         | miRNA | miR-185    |
| t0000684 | 22 | 607 ACCACAGGGTAGA ATTACGGAC    | miRNA | miR-140    |
| t0000689 | 22 | 604 TGAGATAGTAGATTGTATAGTT     | miRNA | let-7f     |
| t0000691 | 22 | 603 ACTGCAGTGAAGGC ACTTGTAG    | miRNA | miR-17*    |
| t0000692 | 21 | 601 GAAGACTGAAGTGG AGAAGGG     | miRNA | miR-739    |
| t0000694 | 22 | 601 TACCACAGGGTAGA ACAACGGA    | miRNA | miR-140    |
| t0000695 | 23 | 599 CAAAGTGCTCATAG TGCAGGTAG   | miRNA | miR-20b    |
| t0000698 | 22 | 599 TGAGGTAGTAGATTGTGTGGTT     | miRNA | let-7b     |
| t0000699 | 20 | 598 TAGCAGCACATAAT GGGTTG      | miRNA | miR-15a    |
| t0000696 | 21 | 597 TCCTGTACTGAGCTG CCTCGA     | miRNA | miR-486-5p |
| t0000701 | 22 | 592 AATGACACGATCACT CCGGTTG    | miRNA | miR-425    |
| t0000703 | 21 | 589 TCCTGTACTGAGCTG CCCCCG     | miRNA | miR-486-5p |
| t0000702 | 22 | 588 TGAGGAAGTAGGTTGTGTGGTT     | miRNA | let-7b     |
| t0000704 | 21 | 587 TATTGCACTCGTCC CGGCCTA     | miRNA | miR-92     |

|          |    |                               |       |             |
|----------|----|-------------------------------|-------|-------------|
| t0000705 | 24 | 585 TGGAGAGAAAGGCAGTTCCTGAGA  | miRNA | miR-185     |
| t0000706 | 19 | 581 CAACGGAATCCCAAAAGCA       | miRNA | miR-191     |
| t0000707 | 21 | 581 TGGGGTAGTAGATTGTATAGT     | miRNA | let-7f      |
| t0000708 | 22 | 580 TGAGGTAGTAGTTTGTGTGGTT    | miRNA | let-7b      |
| t0000709 | 23 | 579 CTGAGGTAGTAGATTGTATAGTT   | miRNA | let-7f      |
| t0000711 | 23 | 573 TACCACAGGGTAGAACTACGGAA   | miRNA | miR-140     |
| t0000710 | 24 | 570 AAAAGCTGGGTTGAGAGGGCGATA  | miRNA | miR-320a    |
| t0000712 | 21 | 568 TGAGGGGCAGATAGCGAGACT     | miRNA | miR-423-5p  |
| t0000713 | 20 | 568 ACCACTGACCGTTGACTGTA      | miRNA | miR-181a-2* |
| t0000716 | 22 | 568 TAGCAGCACGTAAAAATTGGCG    | miRNA | miR-16      |
| t0000718 | 22 | 567 TGAGGTGGTAGGTTGTGTGGTT    | miRNA | let-7b      |
| t0000720 | 20 | 565 TATTGCACTCGTCCCGGCCCT     | miRNA | miR-92      |
| t0000721 | 23 | 562 AAAAGCTGGGTTGAGAGGGCGTG   | miRNA | miR-320d    |
| t0000723 | 21 | 562 ACCACAGGGTAGAACCACGGT     | miRNA | miR-140     |
| t0000727 | 21 | 562 TTAGGTAGTAGATTGTATAGT     | miRNA | let-7f      |
| t0000726 | 25 | 561 TCTCACACAGAAATCGCACCCGTCT | miRNA | miR-342-3p  |
| t0000728 | 24 | 560 TACCACAGGGTAGAACCACGGATA  | miRNA | miR-140     |
| t0000729 | 25 | 558 TGAATGTAAAGAAGTATGTACATC  | miRNA | miR-1a      |
| t0000731 | 22 | 558 TGAGGTAGTAGGTTCTGTGGTT    | miRNA | let-7b      |
| t0000732 | 21 | 556 TAGCAGCACGTAAATATTGGT     | miRNA | miR-16      |
| t0000733 | 24 | 556 TAGCAGCACATAATGGTTTGTGGA  | miRNA | miR-15a     |
| t0000735 | 19 | 555 TTGTA CTGAGCTGCCCCGA      | miRNA | miR-486-5p  |
| t0000736 | 22 | 554 TAGCAGCACGTAAATATTGACG    | miRNA | miR-16      |
| t0000738 | 20 | 553 AATTGCACGGTATCCATCTG      | miRNA | miR-363     |
| t0000739 | 22 | 553 CGGATGAGCAAAGAAAGTGGTT    | miRNA | miR-1255b   |
| t0000742 | 21 | 553 TGAGGTAGGAGATTGTATAGT     | miRNA | let-7e      |
| t0000740 | 21 | 550 AGGGACGGGACGCGGTGCAGT     | miRNA | miR-92b*    |
| t0000741 | 23 | 550 AAAAGCTGGGTTGAGAGGGCGCA   | miRNA | miR-320d    |
| t0000743 | 21 | 546 ACCGCACTGTGGTACTTGCT      | miRNA | miR-106b*   |
| t0000744 | 21 | 545 ACCACAGGGTAGAATTACGGA     | miRNA | miR-140     |
| t0000745 | 23 | 544 AAGGTAGATAGAACAGGTCTTGA   | miRNA | miR-1839    |
| t0000746 | 25 | 544 TAGCAGCACGTAAATATTGGCGAAA | miRNA | miR-16      |
| t0000749 | 20 | 543 GTGAGGACTCGGGAGGTGGA      | miRNA | miR-1224    |
| t0000748 | 22 | 542 TGAGTTAGTAGATTGTATAGTT    | miRNA | let-7f      |
| t0000750 | 22 | 541 TCCTGTA CTGAGCTGCCCTGAG   | miRNA | miR-486-5p  |
| t0000751 | 19 | 540 TGAGGTAGATTGTATAGTT       | miRNA | miR-1961    |
| t0000752 | 22 | 540 TGGAGGGAAAGGCAGTTCCTGA    | miRNA | miR-185     |
| t0000753 | 22 | 540 TACAGTATAGATGATGTA CTAT   | miRNA | miR-144     |
| t0000754 | 22 | 537 TGGAGAGAAAGGCAGTTCCTGG    | miRNA | miR-185     |
| t0000756 | 22 | 534 GTACAGTACTGTGATAACTGAT    | miRNA | miR-101c    |
| t0000755 | 21 | 534 TGAGGTAGTGGATTGTATAGT     | miRNA | let-7f-5p   |
| t0000761 | 21 | 532 TGAGGGGCAGAGAGCGAGATT     | miRNA | miR-423-5p  |
| t0000762 | 22 | 531 AGGTAGATAGAACAGGTCTTGA    | miRNA | miR-1839    |
| t0000763 | 21 | 529 CCACAGGGTAGAACCACGGAA     | miRNA | miR-140     |
| t0000764 | 21 | 528 TGAGGTAGTAGATTGTATGGT     | miRNA | let-7f      |
| t0000766 | 22 | 527 TGAGGTAGTAGATTGGATAGTT    | miRNA | let-7f      |
| t0000767 | 22 | 525 TGGAGAGAAAGGCAGTTCCTGA    | miRNA | miR-185     |
| t0000768 | 20 | 524 CAGCAGCAATTCATGTTTTG      | miRNA | miR-424     |
| t0000769 | 21 | 524 TGAGGTATTAGATTGTATAGT     | miRNA | let-7f      |
| t0000770 | 22 | 523 TGAGGGGCAGAGAGCGAGATTT    | miRNA | miR-423-5p  |
| t0000771 | 21 | 521 TGAGGTAGCAGATTGTATAGT     | miRNA | let-7f      |
| t0000773 | 21 | 520 TGAAGACTGAAGTGGAGAAGG     | miRNA | miR-3526    |
| t0000776 | 22 | 520 TGGAGAGAAAGGCAGTTCATGA    | miRNA | miR-185     |
| t0000775 | 21 | 516 ACTACAGGGTAGAACCACGGA     | miRNA | miR-140     |
| t0000778 | 22 | 512 TGCGGGGCTAGGGCTAACAGCA    | miRNA | miR-744     |
| t0000779 | 22 | 510 TGGAGAGAAAGGTAGTTCCTGA    | miRNA | miR-185     |
| t0000782 | 19 | 508 CAGTACTGTGATAACTGAA       | miRNA | miR-101c    |
| t0000783 | 22 | 507 TGAGGTAGTAGTTTGTGCTGTA    | miRNA | let-7i      |

|          |    |                                |       |            |
|----------|----|--------------------------------|-------|------------|
| t0000785 | 20 | 503 AAGCTGCCAGTTGAAGAACT       | miRNA | miR-22-3p  |
| t0000788 | 23 | 502 TGAGGGGCAGAGAGTGAGACTTT    | miRNA | miR-423-5p |
| t0000790 | 22 | 499 TTCTGTAAGTACTGAGCTGCCCGAG  | miRNA | miR-486-5p |
| t0000791 | 18 | 499 ATCACATTGCCAGGGATT         | miRNA | miR-23a    |
| t0000792 | 21 | 499 ACCACAGGGGAGAACCACGGA      | miRNA | miR-140    |
| t0000793 | 21 | 498 TGAGGTAGTAGATTGTTAGT       | miRNA | let-7f     |
| t0000794 | 22 | 498 TGAGCTAGTAGATTGTATAGTT     | miRNA | let-7f     |
| t0000795 | 22 | 495 TCCTGTAAGTACTGAGCTGCTCCGAG | miRNA | miR-486-5p |
| t0000796 | 21 | 495 TGAGGGGCAGAGAGCGAGCCT      | miRNA | miR-423-5p |
| t0000800 | 22 | 495 TGAGGTCGTAGATTGTATAGTT     | miRNA | let-7f     |
| t0000801 | 20 | 494 AGGCGGAGACTTGGGCAATT       | miRNA | miR-25*    |
| t0000802 | 21 | 494 CTCGGCGTGGCGTGGTCTCGTG     | miRNA | miR-1307   |
| t0000803 | 22 | 493 TGAGGTAGTAGATTTTATAGTT     | miRNA | let-7f     |
| t0000806 | 22 | 489 ACCACAGGGTAGAACTACGGAA     | miRNA | miR-140    |
| t0000807 | 21 | 489 AGGTAGTAGATTGTATAGTTG      | miRNA | let-7f     |
| t0000809 | 22 | 488 TGAGGGAGTAGTTTGTACAGTT     | miRNA | let-7g     |
| t0000810 | 22 | 488 TGAGGTAGTAGGTTGTGTGGTG     | miRNA | let-7b     |
| t0000811 | 21 | 486 TGGAGAGAAAGGCATTTCTG       | miRNA | miR-185    |
| t0000812 | 22 | 486 TACCACAGTGTAGAACCACGGA     | miRNA | miR-140    |
| t0000814 | 21 | 485 ATCACATTGCCAGGGATTTCA      | miRNA | miR-23a    |
| t0000818 | 21 | 485 TAGGTAGTAGATTGTATAGTT      | miRNA | let-7f     |
| t0000819 | 21 | 482 TGAGGTAGTAGCTTGTATAGT      | miRNA | let-7f     |
| t0000817 | 22 | 481 TACAGTATAGATGATGTAATAA     | miRNA | miR-144    |
| t0000820 | 21 | 480 CCACAGGGTAGAACCACGGAC      | miRNA | miR-140    |
| t0000821 | 22 | 479 TCGAATCCGAGTCACGGCACCA     | miRNA | miR-4454   |
| t0000822 | 24 | 477 TAGCTTATCAGACTGATGTTGATC   | miRNA | miR-21     |
| t0000824 | 22 | 476 CATTGCATTTGTCTCGGTCTGA     | miRNA | miR-25     |
| t0000825 | 23 | 475 ATGAGGTAGTAGATTGTATAGTT    | miRNA | let-7f     |
| t0000826 | 19 | 474 CCCATAAAGTAGAAAGCAC        | miRNA | miR-142    |
| t0000827 | 22 | 472 TGGAGAGAAAGGGAGTTCCTGA     | miRNA | miR-185    |
| t0000832 | 21 | 469 TAGCACCATTTGAAATCGGTT      | miRNA | miR-29c    |
| t0000831 | 19 | 468 ACTGCAGTGAAGGCACTTG        | miRNA | miR-17*    |
| t0000834 | 22 | 467 TACCACATGGTAGAACCACGGA     | miRNA | miR-140    |
| t0000835 | 23 | 465 AACGGAATCCCAAAGCAGCTGT     | miRNA | miR-191    |
| t0000836 | 23 | 465 ACTGCAGTGAAGGCACTTGTAGA    | miRNA | miR-17*    |
| t0000837 | 21 | 464 TGAGGGGCAGAGAGTGAGACT      | miRNA | miR-423-5p |
| t0000838 | 21 | 464 ATTGCACTTGTCTCGGTCTGA      | miRNA | miR-25     |
| t0000839 | 20 | 464 TGAGGTAGTAGATTGTATAA       | miRNA | let-7f     |
| t0000840 | 22 | 464 TGAGGTAGTAGGGTGTATAGTT     | miRNA | let-7      |
| t0000841 | 24 | 463 TGGCTCAGTTCAGCAGGAACAGTT   | miRNA | miR-24     |
| t0000842 | 22 | 461 TGGAGATAAAGGCAGTTCCTGA     | miRNA | miR-185    |
| t0000844 | 21 | 460 CATAAAGTAGAAAGCACTACT      | miRNA | miR-142-5p |
| t0000845 | 21 | 457 TCCTGTAAGTACTGAGCTGCCTTGA  | miRNA | miR-486-5p |
| t0000849 | 22 | 457 TGAGGTAGTCGATTGTATAGTT     | miRNA | let-7f     |
| t0000850 | 21 | 454 TGGAGAGAAAGGCAGTTCCTG      | miRNA | miR-185    |
| t0000851 | 22 | 452 TCCTGTAAGTACTGAGCTGCCTCGAG | miRNA | miR-486-5p |
| t0000852 | 23 | 451 TGAGGTAGTAGTTTGTACAGTTT    | miRNA | let-7g     |
| t0000853 | 19 | 450 TGGGTTTACGTTGGGAGAA        | miRNA | miR-629    |
| t0000857 | 18 | 450 CCCATAAAGTAGAAAGCA         | miRNA | miR-142    |
| t0000856 | 22 | 449 TAGCAGCACGTAATATTAGCG      | miRNA | miR-16     |
| t0000854 | 23 | 445 ACTGGACTTGGAGTCAGAAGGCT    | miRNA | miR-378    |
| t0000855 | 24 | 443 TGAGGGGCAGAGAGCGAGACTTGA   | miRNA | miR-423-5p |
| t0000861 | 24 | 443 TGGACGGAGAAGTATAAGGGATC    | miRNA | miR-184    |
| t0000862 | 19 | 441 TAGCACGTAATATTGGCG         | miRNA | miR-16c    |
| t0000863 | 21 | 440 TCCTGTAAGTACTGAGTTGCCCGA   | miRNA | miR-486-5p |
| t0000866 | 21 | 440 TACAGTATAGATGATGTAATAA     | miRNA | miR-144    |
| t0000867 | 22 | 439 TGAGGTAGTAGGTTGTTGGTT      | miRNA | let-7b     |
| t0000868 | 20 | 436 TGAAGACTGAAGTGGAGAAG       | miRNA | miR-3526   |

|          |    |                                |       |             |
|----------|----|--------------------------------|-------|-------------|
| t0000869 | 18 | 435 CATTGCACTTGTCTCGGT         | miRNA | miR-25      |
| t0000871 | 22 | 435 CCGCACTGTGGGTTACTTGCTGA    | miRNA | miR-106b*   |
| t0000874 | 21 | 434 TAAAGTGCTTATAGTGCAGGT      | miRNA | miR-20      |
| t0000873 | 21 | 433 TGAGGGGCAGAGAGCTAGACT      | miRNA | miR-423-5p  |
| t0000876 | 20 | 430 AGCAGCATTGTACAGGGCTT       | miRNA | miR-107b    |
| t0000882 | 22 | 429 CAACGGAATCCCAAAAGCAGCA     | miRNA | miR-191     |
| t0000886 | 19 | 429 TAGCAGCACATTATGGTTT        | miRNA | miR-15b     |
| t0000887 | 23 | 426 TGAGTGGCAGAGAGCGAGACTTT    | miRNA | miR-423-5p  |
| t0000889 | 20 | 424 TAGCAGCACATAATGGTTGT       | miRNA | miR-15a     |
| t0000890 | 21 | 424 TGAGGTAGTAGGTTGTTTGGT      | miRNA | let-7b      |
| t0000892 | 25 | 421 TGGACGGAGAACTGATAAGGGCATC  | miRNA | miR-184-3p  |
| t0000893 | 20 | 421 TGAGGTAGTAGGTTGTGTGT       | miRNA | let-7b      |
| t0000896 | 24 | 420 TGACCTATGAATTGACAGCCAGTA   | miRNA | miR-192     |
| t0000897 | 22 | 420 TGACCTATGAATTGACAGCCAG     | miRNA | miR-192     |
| t0000898 | 21 | 419 TGAGGTACTAGATTGTATAGT      | miRNA | let-7f      |
| t0000900 | 21 | 418 TTCTGTACTGAGCTGCCCCGA      | miRNA | miR-486-5p  |
| t0000901 | 22 | 418 TAGCACCATCTGAAATCGGTTA     | miRNA | miR-29c     |
| t0000904 | 19 | 417 AATTGCACGGTATCCATCT        | miRNA | miR-363     |
| t0000905 | 21 | 417 TGTA AACATCCTACACTCTCA     | miRNA | miR-30c     |
| t0000906 | 22 | 417 CTGAGGTAGTAGATTGTATAGT     | miRNA | let-7f      |
| t0000908 | 23 | 416 TGAGGGGCAGAGGGCGAGACTTT    | miRNA | miR-423-5p  |
| t0000912 | 22 | 416 TACCATAGGGTAGAACACCGGA     | miRNA | miR-140     |
| t0000910 | 22 | 415 TACCACAGGGTAGAACACCGGA     | miRNA | miR-140     |
| t0000917 | 23 | 413 TACCATAGGGTAGAACACGGAC     | miRNA | miR-140     |
| t0000914 | 22 | 413 TGAGTTAGTAGGTTGTGTGGTT     | miRNA | let-7b      |
| t0000918 | 22 | 411 CTGGA CTGGAGTCAGAAGGCT     | miRNA | miR-378     |
| t0000919 | 24 | 411 TAAAGTGCTTATAGTGCAGGTAGA   | miRNA | miR-20      |
| t0000920 | 24 | 411 TGGAGTGTGACAATGGTGTGTTATC  | miRNA | miR-122     |
| t0000923 | 22 | 411 TGAGGTAGTAGATTGTCTAGTT     | miRNA | let-7f      |
| t0000924 | 22 | 411 TGAGGCAGTAGGTTGTGTGGTT     | miRNA | let-7b      |
| t0000928 | 22 | 408 TGAAGTAGTAGATTGTATAGTT     | miRNA | let-7f      |
| t0000929 | 21 | 407 TGAGGGGCAGAGAGCGAGAAT      | miRNA | miR-423-5p  |
| t0000927 | 22 | 407 TAGCAGCACTTAAATATTGGCG     | miRNA | miR-16      |
| t0000930 | 20 | 407 AGCAGCATTGTACAGGGTTA       | miRNA | miR-103a    |
| t0000932 | 23 | 406 TGAGGTGCAGAGAGCGAGACTTT    | miRNA | miR-423-5p  |
| t0000934 | 22 | 405 CTAGACTGAAGCTCCTTGAGGA     | miRNA | miR-151-3p  |
| t0000938 | 23 | 403 TCTTGTACTGAGCTGCCCCGAGA    | miRNA | miR-486-5p  |
| t0000940 | 20 | 403 TGTAGAGCAGGGAGCAGGAA       | miRNA | miR-4732-5p |
| t0000947 | 20 | 403 TTTGGCAATGGTAGAACTCA       | miRNA | miR-182     |
| t0000944 | 22 | 402 ACTGGGAAGAGGAGCTGAGGGA     | miRNA | miR-4646-5p |
| t0000948 | 22 | 402 GAAAAGCTGGGTTGAGAGGGCG     | miRNA | miR-320a    |
| t0000943 | 22 | 401 TAGCAGCACATAAATATTGGCG     | miRNA | miR-16      |
| t0000946 | 22 | 400 TGGGGAGAAAGGCAGTTCCTGA     | miRNA | miR-185     |
| t0000950 | 22 | 400 TAGCAGCACGTA AATATTTCGCG   | miRNA | miR-16      |
| t0000951 | 23 | 399 TAAAGTGCTTATAGTGCAGGTAG    | miRNA | miR-20      |
| t0000953 | 22 | 399 TGAGGTAGTTGATTGTATAGTT     | miRNA | let-7f      |
| t0000952 | 22 | 399 TGAGGTAGTAGGTTGTGTGGGT     | miRNA | let-7b      |
| t0000954 | 21 | 398 TGGAGAGAAAGGCAGTTCCTA      | miRNA | miR-185     |
| t0000957 | 22 | 398 TATCAGCACGTA AATATTGGCG    | miRNA | miR-16      |
| t0000964 | 21 | 397 TCCTGTACTGAGCTGCCCTGA      | miRNA | miR-486-5p  |
| t0000960 | 26 | 397 TGGAGTGTGACAATGGTGTGTTGATC | miRNA | miR-122     |
| t0000961 | 22 | 396 TATTGCACTCGTCCCGGCCTAA     | miRNA | miR-92      |
| t0000967 | 20 | 396 AAGGTAGATAGAACAGGTCT       | miRNA | miR-1839    |
| t0000965 | 23 | 396 ACCACAGGGTAGAACACGGAAT     | miRNA | miR-140     |
| t0000968 | 26 | 395 TCCTGTACTGAGCTGCCCCGAGAAGA | miRNA | miR-486-5p  |
| t0000969 | 22 | 394 TACCACAGGGGAGAACCACGGA     | miRNA | miR-140     |
| t0000970 | 26 | 392 TCCTGTACTGAGCTGCCCCGAGGTCC | miRNA | miR-486-5p  |
| t0000973 | 24 | 392 TGAGGGGCAGAGAGCGAGACTTAT   | miRNA | miR-423-5p  |



|          |    |                                 |       |             |
|----------|----|---------------------------------|-------|-------------|
| t0000976 | 20 | 392 ATCACATTGCCAGGGATTTT        | miRNA | miR-23a     |
| t0000975 | 23 | 391 ACTGGACTTGGAGTCAGAAGGCG     | miRNA | miR-378     |
| t0000977 | 23 | 390 ACTGGCTAGGGAAAATGATTGGA     | miRNA | miR-664*    |
| t0000978 | 21 | 390 ACCATAGGGTAGAACCACGGA       | miRNA | miR-140     |
| t0000979 | 22 | 390 TGATGTAGTAGGTTGTGTGGTT      | miRNA | let-7b      |
| t0000980 | 21 | 386 TGAGGTAGTAGATTGAATAGT       | miRNA | let-7k      |
| t0000982 | 22 | 385 ACTGGACTTGGAGTCAGAAGGA      | miRNA | miR-378c    |
| t0000981 | 20 | 385 TTCAAGTAATTCAGGATAGG        | miRNA | miR-26b     |
| t0000983 | 21 | 384 AAACCGTTACCATTACTGAGA       | miRNA | miR-451     |
| t0000985 | 23 | 384 TGTAACAGCAACTCCATGTGGAA     | miRNA | miR-194     |
| t0000987 | 24 | 382 TGAGGGGCAGAGAGCGAGACTTAG    | miRNA | miR-423-5p  |
| t0000991 | 22 | 381 GTAGAGGAGATGGCGCAGGGGA      | miRNA | miR-877     |
| t0000989 | 25 | 381 TCTCACACAGAAATCGCACCCGTCA   | miRNA | miR-342-3p  |
| t0000990 | 22 | 381 AGCTACATTGTCTGCTGGGTTT      | miRNA | miR-221     |
| t0000993 | 21 | 381 TGAGGTAGTAGGGTGTGTGGT       | miRNA | let-7b      |
| t0000994 | 22 | 380 CACCCGGCTGTGTGCACATGTG      | miRNA | miR-941     |
| t0000996 | 21 | 380 GGAGAGAAAGGCAGTTCCTGA       | miRNA | miR-185     |
| t0000995 | 21 | 380 TGAGGTAGTAGATTGTATCGT       | miRNA | let-7f      |
| t0000999 | 19 | 380 TGAGGTAGTAGTTGTGGT          | miRNA | let-7b      |
| t0001003 | 22 | 379 TGGAGAGAAAGGCAGTTTTTGA      | miRNA | miR-185     |
| t0001001 | 20 | 378 TGAGGTGGTAGATTGTATAG        | miRNA | let-7f      |
| t0001004 | 22 | 377 CCACAGGGTAGAACCACGGACA      | miRNA | miR-140     |
| t0001006 | 22 | 376 TGGAGAGAAAGGCAGTTCCTGA      | miRNA | miR-185     |
| t0001008 | 24 | 375 GAAGACTGAAGTGGAGAAGGGTTT    | miRNA | miR-739     |
| t0001012 | 22 | 374 TGGAGAGAAAGGCAGTCCCTGA      | miRNA | miR-185     |
| t0001011 | 24 | 373 TGTAACATCCTACACTCTCAGCT     | miRNA | miR-30c     |
| t0001013 | 21 | 373 ATCACAGGGTAGAACCACGGA       | miRNA | miR-140     |
| t0001010 | 22 | 372 TGTCAGTTTGTCAAATACCCCA      | miRNA | miR-223     |
| t0001017 | 24 | 372 ACCACAGGGTAGAACCACGGAAGA    | miRNA | miR-140     |
| t0001016 | 23 | 371 TGAGGGGAAGAGAGCGAGACTTT     | miRNA | miR-423-5p  |
| t0001014 | 21 | 371 TGAGGATGGATAGCAAGGAAG       | miRNA | miR-3605-5p |
| t0001015 | 22 | 371 AAAAGCTGGGTTGAGAGGGAGA      | miRNA | miR-320d    |
| t0001019 | 25 | 371 TACCCTGTAGATCCGAATTTGTATC   | miRNA | miR-10a     |
| t0001020 | 26 | 369 TCTTTGGTTATCTAGCTGTATGAATC  | miRNA | miR-9a      |
| t0001021 | 28 | 369 TCCTGTACTGAGCTGCCCGAGACGGCA | miRNA | miR-486-5p  |
| t0001023 | 22 | 369 TGAGGTTGTAGATTGTATAGTT      | miRNA | let-7f      |
| t0001024 | 24 | 368 AAAAGCTGGGTTGAGAGGGCGAAG    | miRNA | miR-320a    |
| t0001025 | 21 | 367 AAGACTGAAGTGGAGAAGGGT       | miRNA | miR-739     |
| t0001028 | 21 | 366 TCAAGTAATCCAGGATAGGCT       | miRNA | miR-26a     |
| t0001029 | 26 | 366 TGAGGTAGTAGGTTGTATGGTTTATC  | miRNA | let-7b      |
| t0001032 | 22 | 365 AAAGCTGGGTTGAGAGGGCGTT      | miRNA | miR-320d    |
| t0001031 | 21 | 365 TGAGGTACTAGGTTGTGTGGT       | miRNA | let-7b      |
| t0001037 | 21 | 365 TGAGGTAGTAGGGTGTATAGT       | miRNA | let-7       |
| t0001036 | 26 | 364 AGGGCTGGGTCGGTCGGGCTGGGGCG  | miRNA | miR-4651    |
| t0001035 | 21 | 364 TGAGGTAGTAGACTGTATAGT       | miRNA | let-7f      |
| t0001034 | 22 | 363 AAAGTGTACCATTACTGAGTT       | miRNA | miR-451     |
| t0001040 | 21 | 362 TCCTGTACTGAGCTGTCCCGA       | miRNA | miR-486-5p  |
| t0001041 | 22 | 362 CGGAGAGAAAGGCAGTTCCTGA      | miRNA | miR-185     |
| t0001039 | 20 | 362 CTAGACTGAAGCTCCTTGAG        | miRNA | miR-151-3p  |
| t0001042 | 21 | 362 TGAGGTAGTAGGTTGTGCGGT       | miRNA | let-7b      |
| t0001043 | 21 | 361 TGAGGGGCAGAGAGCGGGACT       | miRNA | miR-423-5p  |
| t0001045 | 21 | 361 TGAGAGAAAGGCAGTTCCTGA       | miRNA | miR-185     |
| t0001047 | 22 | 361 TGAGGTAGTAAATTGTATAGTT      | miRNA | let-7f      |
| t0001051 | 22 | 360 AAAAGCTGGGTTGAGATGGCGA      | miRNA | miR-320a    |
| t0001049 | 22 | 360 TGGGGTAGTAGGTTGTGTGGTT      | miRNA | let-7b      |
| t0001048 | 24 | 359 TAGCAGCACGTAATATTGGCGTT     | miRNA | miR-16      |
| t0001053 | 22 | 359 TGAGGTAGTAGGTTGTACAGTT      | miRNA | let-7       |
| t0001054 | 24 | 358 GGATATCATCATATACTGTAAGTT    | miRNA | miR-144*    |

|          |    |                               |       |             |
|----------|----|-------------------------------|-------|-------------|
| t0001055 | 24 | 358 TACCACAGGGTAGAACCACGGCCA  | miRNA | miR-140     |
| t0001060 | 22 | 355 AACTTTGAAGACTGAAGTGGAG    | miRNA | miR-3526    |
| t0001057 | 22 | 355 TACCACAGGGTAGAACCAAGGA    | miRNA | miR-140     |
| t0001059 | 25 | 354 TCGTACCGTGAGTAATAATGCGATC | miRNA | miR-126     |
| t0001058 | 22 | 354 TACAGTACTGTGATAACTGATT    | miRNA | miR-101c    |
| t0001062 | 18 | 352 TCCTGTACTGAGCTGCCC        | miRNA | miR-486-5p  |
| t0001063 | 21 | 352 TGAGGTAGTAGTTTGTGTGTT     | miRNA | let-7b      |
| t0001064 | 24 | 351 TGAGGTAGTAGGTTGTGTGTTTT   | miRNA | let-7b      |
| t0001066 | 24 | 350 TGGAGAGAAAGGCAGTTCCTGAAG  | miRNA | miR-185     |
| t0001067 | 19 | 349 CTCGGCGTGGCGTCGGTCCG      | miRNA | miR-1307    |
| t0001069 | 20 | 348 CTGTAAGTACTGAGCTGCCCGAG   | miRNA | miR-486-5p  |
| t0001068 | 22 | 347 AATCTGAGAAGGCGCACAAGGT    | miRNA | miR-3200-5p |
| t0001072 | 22 | 347 TGGAGAAAAAGGCAGTTCCTGA    | miRNA | miR-185     |
| t0001070 | 25 | 347 TCAGTGCCTACAGAACTTTGTATC  | miRNA | miR-148a    |
| t0001074 | 21 | 347 TGAGGAAGTAGTTGTGTGGT      | miRNA | let-7b      |
| t0001073 | 20 | 345 TAGCAGCACATTATGGTTTA      | miRNA | miR-15b     |
| t0001076 | 19 | 343 GAGGTAGTAGATTGTATAG       | miRNA | let-7f      |
| t0001077 | 21 | 342 TGAGGTAGTAGTTGTGTTGT      | miRNA | let-7b      |
| t0001079 | 19 | 341 TGTAAGAGCAGGGAGCAGGA      | miRNA | miR-4732-5p |
| t0001080 | 22 | 341 TGGAGAGAAGGGCAGTTCCTGA    | miRNA | miR-185     |
| t0001083 | 21 | 341 TGAGGTGGTAGTTGTATAGT      | miRNA | let-7       |
| t0001084 | 23 | 340 CAAAGTGCTGTTCGTGCAGGTAT   | miRNA | miR-93      |
| t0001085 | 19 | 340 TGAGGTAGTAGTTTGTACA       | miRNA | let-7g      |
| t0001087 | 25 | 340 TGAGGTAGTAGATTGTATAGTTATC | miRNA | let-7f      |
| t0001093 | 21 | 340 TGAGGCAGTAGGTTGTGTGGT     | miRNA | let-7b      |
| t0001096 | 19 | 338 CTGTAAGTACTGAGCTGCCCGA    | miRNA | miR-486-5p  |
| t0001092 | 23 | 338 AGCAGCATTGTACAGGGCTATAA   | miRNA | miR-107     |
| t0001095 | 21 | 337 GTGAGGACTCGGGAGGTGGAG     | miRNA | miR-1224    |
| t0001098 | 21 | 337 TAAGGTAGTAGATTGTATAGT     | miRNA | let-7f      |
| t0001102 | 24 | 337 TGAGGTAGTAGGTTGTATAGTATC  | miRNA | let-7-5p    |
| t0001103 | 22 | 336 TGGGTCTTTCGCGGCGAGATGA    | miRNA | miR-193a-5p |
| t0001104 | 19 | 335 TACAGTATAGATGATGTAC       | miRNA | miR-144     |
| t0001105 | 23 | 334 AAAAGCTGGGTTGAGAGGGCAA    | miRNA | miR-320b    |
| t0001106 | 22 | 334 TTCAAGTAATTCAGGATAGGTA    | miRNA | miR-26b     |
| t0001109 | 21 | 333 TATTGCACTTGTCCCGCCTA      | miRNA | miR-92a     |
| t0001110 | 22 | 333 AAACCTTACCATTACTGAGTTT    | miRNA | miR-451     |
| t0001108 | 21 | 333 TTCGGGGTCTGGGCGCGGCGA     | miRNA | miR-4508    |
| t0001107 | 22 | 333 TGAGGTATTAGGTTGTGTGGTT    | miRNA | let-7b      |
| t0001116 | 23 | 331 TGAGGTAGTAGTTTGTGCTGTAA   | miRNA | let-7i      |
| t0001115 | 21 | 331 TGAGGTAGTAGTTTGTGTGGT     | miRNA | let-7b      |
| t0001120 | 22 | 330 TGGAGAGAAAAGCAGTTCCTGA    | miRNA | miR-185     |
| t0001117 | 20 | 329 AAACCTTACCATTACTGAGT      | miRNA | miR-451     |
| t0001119 | 22 | 329 TGTAACATCCCCGACTGGAAG     | miRNA | miR-30d     |
| t0001124 | 23 | 329 TACCACAGGGTAGAACCACGGCA   | miRNA | miR-140     |
| t0001125 | 20 | 329 TGAGGTAGTAGGTTGTATGG      | miRNA | let-7c      |
| t0001126 | 22 | 328 TCAGTGCCTACAGAACTTTGA     | miRNA | miR-148a    |
| t0001127 | 21 | 327 ACCACAGGGTAGAAACACGGA     | miRNA | miR-140     |
| t0001128 | 22 | 326 ATGAGGTAGTAGATTGTATAGT    | miRNA | let-7f      |
| t0001129 | 19 | 325 AAACCTTACCATTACTGAG       | miRNA | miR-451     |
| t0001133 | 21 | 324 TGAGGGCAGAGAGCGAGACG      | miRNA | miR-423-5p  |
| t0001130 | 21 | 324 ATCACATTGCCAGGGATTTC      | miRNA | miR-23a     |
| t0001136 | 20 | 324 TGAGGTAGTAGTTTGTGCTT      | miRNA | let-7i      |
| t0001137 | 18 | 323 TGGGTTTACGTTGGGAGA        | miRNA | miR-629     |
| t0001138 | 21 | 323 AAACCTTACCATTACTGAGT      | miRNA | miR-451     |
| t0001140 | 20 | 323 AACTTTGAAGACTGAAGTGG      | miRNA | miR-3526    |
| t0001141 | 19 | 323 TGTAAGTAGATTGTATAGTT      | miRNA | let-7f      |
| t0001139 | 22 | 322 TGAGGTGGTAGTTTGTGCTGTT    | miRNA | let-7i      |
| t0001142 | 21 | 322 TGAGGTAGTAGATTGGATAGT     | miRNA | let-7f      |

|          |    |                               |       |            |
|----------|----|-------------------------------|-------|------------|
| t0001145 | 22 | 322 TGAGGTAGTAGAATGTATAGTT    | miRNA | let-7f     |
| t0001146 | 21 | 322 TGAGGTAGTAGATTATATAGT     | miRNA | let-7f     |
| t0001148 | 22 | 321 TGAGGGGCAGAGAGAGACTT      | miRNA | miR-423-5p |
| t0001151 | 22 | 321 TAGCAGCTCGTAAATATTGGCG    | miRNA | miR-16     |
| t0001155 | 26 | 321 TGAGGTAGTAGGTTGTGTGTTTATC | miRNA | let-7b     |
| t0001157 | 21 | 320 TGAGGGGAAGAGAGCGAGACT     | miRNA | miR-423-5p |
| t0001154 | 22 | 320 AAAAGCTGTTTTGAGAGGGCGA    | miRNA | miR-320a   |
| t0001159 | 22 | 319 TGAGGTAGTAGGTTGTATATTT    | miRNA | let-7      |
| t0001162 | 21 | 319 GAGGTAGTAGGTTGTATAGTT     | miRNA | let-7      |
| t0001160 | 22 | 318 TCCTGTACTGAGTTGCCCGAG     | miRNA | miR-486-5p |
| t0001161 | 21 | 318 TCCTGTACTGAGCTCCCCCGA     | miRNA | miR-486-5p |
| t0001165 | 20 | 318 TGTGAGGTTGGCATTGTTGT      | miRNA | miR-1294   |
| t0001167 | 22 | 316 TGTGGTAGTAGATTGTATAGTT    | miRNA | let-7f     |
| t0001168 | 20 | 315 TCAGTGCCTACAGAACTTT       | miRNA | miR-148a   |
| t0001169 | 22 | 315 TCAGGTAGTAGATTGTATAGTT    | miRNA | let-7f     |
| t0001173 | 23 | 315 TGAGGTAGTAGGTTGTGTGGTGA   | miRNA | let-7b     |
| t0001171 | 22 | 314 TGGAGAGGAAGGCAGTTCCTGA    | miRNA | miR-185    |
| t0001170 | 23 | 314 ACCACAGGGTAGAATCACGGACA   | miRNA | miR-140    |
| t0001175 | 22 | 313 TTATAATACAACCTGATAAGTG    | miRNA | miR-374a   |
| t0001177 | 22 | 313 CAGCAGCACGTAAATATTGGCG    | miRNA | miR-16     |
| t0001178 | 24 | 313 TCTGGGCAACAAAGTGAGACCTGA  | miRNA | miR-1285   |
| t0001180 | 22 | 313 TGAGGTAGTAGGTTGTGTGGAT    | miRNA | let-7b     |
| t0001181 | 21 | 312 AGCTACATTGTCTGCTGGGTT     | miRNA | miR-221    |
| t0001182 | 23 | 311 TGAGGGGCAGAGACCGAGACTTT   | miRNA | miR-423-5p |
| t0001184 | 22 | 311 CATTGCACTTGTCTCGGGCTGA    | miRNA | miR-25     |
| t0001186 | 22 | 311 TGAGGTGGTAGGTTGTATAGTT    | miRNA | let-7      |
| t0001193 | 20 | 310 ACTGGACTTGGAGTCAGAAG      | miRNA | miR-378    |
| t0001192 | 21 | 309 TGAGGGGCAGAGAGCGAGGCT     | miRNA | miR-423-5p |
| t0001191 | 23 | 309 TGGAGAGAAAGGCAGTTCCTGTA   | miRNA | miR-185    |
| t0001198 | 24 | 309 TACCACAGGGTAGAACCACGGAAG  | miRNA | miR-140    |
| t0001196 | 20 | 308 GAGGTAGTAGGTTGTATAGT      | miRNA | let-7      |
| t0001199 | 22 | 307 TGGAGAGAAAGCCAGTTCCTGA    | miRNA | miR-185    |
| t0001200 | 21 | 306 TGAAGGTAGACGGCCAGAGA      | miRNA | miR-3190   |
| t0001201 | 24 | 305 ACTGGACTTGGAGTCAGAAGGATC  | miRNA | miR-378f   |
| t0001202 | 20 | 305 TAGCAGCATATAATGGTTTTG     | miRNA | miR-15a    |
| t0001204 | 22 | 305 ACCACAGGGTAGAACCACGGCC    | miRNA | miR-140    |
| t0001206 | 22 | 304 TGACGTAGTAGATTGTATAGTT    | miRNA | let-7f     |
| t0001208 | 23 | 303 TACCACAGGGTAGAACAACGGAC   | miRNA | miR-140    |
| t0001205 | 22 | 303 TGAGGTAGTAGGCTGTGTGGTT    | miRNA | let-7b     |
| t0001210 | 21 | 302 TGAGGTAGTAGATTGTATAGC     | miRNA | let-7f     |
| t0001213 | 21 | 302 AGAGGTAGTAGGTTGCATAGA     | miRNA | let-7d     |
| t0001214 | 21 | 301 TACGTCATCGTTGTCATCGTC     | miRNA | miR-598    |
| t0001215 | 21 | 301 CGGGGCAGCTCAGTACAGGAT     | miRNA | miR-486-3p |
| t0001217 | 20 | 300 TGAGGGAGTAGGTTGTATAG      | miRNA | miR-1827   |
| t0001218 | 19 | 300 TAGCAGCAAATCATGGTTT       | miRNA | miR-15b    |
| t0001220 | 22 | 300 TGAGGTAGTAGATTGTATAATT    | miRNA | let-7f     |
| t0001225 | 20 | 299 TGAGGTAGTAAGTTGTATTG      | miRNA | miR-98     |
| t0001223 | 21 | 299 AAAGTGTACCATTACTGAGT      | miRNA | miR-451    |
| t0001224 | 20 | 299 TTAGGTAGTAGATTGTATAG      | miRNA | let-7f     |
| t0001226 | 20 | 299 TGAGGTAGTAGATTGCATAG      | miRNA | let-7f     |
| t0001231 | 21 | 298 CCGCACTGTGGGTTACTTGCTG    | miRNA | miR-106b*  |
| t0001232 | 22 | 297 AAACCGTTACTATTACTGAGTT    | miRNA | miR-451    |
| t0001234 | 22 | 297 TGGAGAGAAATGCAGTTCCTGA    | miRNA | miR-185    |
| t0001235 | 23 | 297 AGGTAGATAGAACAGGTCTTGTT   | miRNA | miR-1839   |
| t0001237 | 21 | 297 TCACAGTGAACCGGTCTCTTT     | miRNA | miR-128    |
| t0001238 | 21 | 297 CAGCATTGTACAGGGCTATGA     | miRNA | miR-103a   |
| t0001240 | 22 | 296 ACCACAGGGTAGAACTACGGAT    | miRNA | miR-140    |
| t0001241 | 25 | 295 CACCCGTAGAACCGACCTTGCATC  | miRNA | miR-99b    |

|          |    |                                 |       |             |
|----------|----|---------------------------------|-------|-------------|
| t0001239 | 21 | 295 TATTGCACTTGTCCCGGCCTT       | miRNA | miR-92b     |
| t0001247 | 19 | 295 TAGCAGAACATCATGGTTT         | miRNA | miR-15b     |
| t0001245 | 23 | 295 TAGCAGCACATAATGGTTTGTGA     | miRNA | miR-15a     |
| t0001248 | 23 | 295 TCTCCCAACCCTTGTACCAGTGA     | miRNA | miR-150     |
| t0001249 | 21 | 295 TGAGGTAGTAGATTCTATAGT       | miRNA | let-7f      |
| t0001251 | 22 | 294 TGTAGAGCAGGGAGCAGGAAGA      | miRNA | miR-4732-5p |
| t0001256 | 23 | 294 TAAAGTGCTTATAGTGCAGGTAA     | miRNA | miR-20      |
| t0001257 | 22 | 294 TGGAGAGAAAGACAGTTCCTGA      | miRNA | miR-185     |
| t0001252 | 18 | 294 TAGCAGCACGTAAATATT          | miRNA | miR-16      |
| t0001253 | 21 | 294 ACCACAGGGTAGAACCCCGGA       | miRNA | miR-140     |
| t0001255 | 19 | 294 TGAGGTAGTAGGTGTGGTT         | miRNA | let-7a      |
| t0001258 | 24 | 293 AAAAGCTGGGTTGAGAGGGCGTAA    | miRNA | miR-320d    |
| t0001263 | 22 | 293 TGGAGAGAAAGGCAGTTCCTAA      | miRNA | miR-185     |
| t0001264 | 22 | 293 TGAGGTAGTAGGTTGCATAGTT      | miRNA | let-7       |
| t0001261 | 22 | 292 CATGCCTTGAGTGTAGGACCGT      | miRNA | miR-532-5p  |
| t0001266 | 23 | 292 AAACCGTTACCATTATTGAGTTT     | miRNA | miR-451     |
| t0001259 | 20 | 292 AGCTACATTGTCTGCTGGGT        | miRNA | miR-221     |
| t0001260 | 23 | 292 TGGAGAGAAAGGAAGTTCCTGAA     | miRNA | miR-185     |
| t0001271 | 19 | 292 ACCACTGACCGTTGACTGT         | miRNA | miR-181a-2* |
| t0001267 | 21 | 291 TGAGGTAGTAGGTTGTATAGA       | miRNA | let-7       |
| t0001268 | 22 | 290 GAGGGGCAGAGAGCGAGACTTT      | miRNA | miR-423-5p  |
| t0001270 | 26 | 290 TGTA AACATCCTTGACTGGAAGCATC | miRNA | miR-30e-5p  |
| t0001273 | 19 | 290 TAGCAGCATATCATGGTTT         | miRNA | miR-15b     |
| t0001269 | 26 | 289 CTTTGAAGACTGAAGTGGAGAAGGGT  | miRNA | miR-3526    |
| t0001276 | 22 | 289 TGAGGTAGTAGGTTGTATAGTG      | miRNA | let-7-5p    |
| t0001279 | 22 | 288 AAACCGTTACCATTACTGAGTA      | miRNA | miR-451     |
| t0001274 | 22 | 288 TGGAGTGAAAGGCAGTTCCTGA      | miRNA | miR-185     |
| t0001287 | 22 | 288 TAGCAGCACATCATGGTTTTCA      | miRNA | miR-15c     |
| t0001281 | 22 | 287 AAACAGTTACCATTACTGAGTT      | miRNA | miR-451     |
| t0001286 | 23 | 287 TGATGGGCAGAGAGCGAGACTTT     | miRNA | miR-423-5p  |
| t0001285 | 22 | 287 AAGCTGCCAGTTGAAGA ACTGT     | miRNA | miR-22-3p   |
| t0001282 | 24 | 287 ACCACAGGGTAGAACACGGACAA     | miRNA | miR-140     |
| t0001288 | 24 | 286 TCTGGGCACAGGCGGATGGACAGA    | miRNA | miR-5107    |
| t0001292 | 18 | 285 TGGCTCAGTTCAGCAGGA          | miRNA | miR-24      |
| t0001293 | 22 | 285 TAGCAGCACGTAAATATTGGGG      | miRNA | miR-16      |
| t0001290 | 23 | 284 AAAGGTAGATAGAACAGGTCTTG     | miRNA | miR-1839    |
| t0001294 | 26 | 284 TGAGATGAAGCACTGTAGCTCTTATC  | miRNA | miR-143     |
| t0001295 | 22 | 283 CATTGCACTTGTCTCGGTCTGC      | miRNA | miR-25      |
| t0001298 | 21 | 282 TGAGGGGCAGAGACCGAGACT       | miRNA | miR-423-5p  |
| t0001297 | 23 | 282 TGAGGGGCAGAGAGCGAGGCTTT     | miRNA | miR-423-5p  |
| t0001299 | 21 | 282 TTGGGGAAACGGCCGCTGAGT       | miRNA | miR-2110    |
| t0001302 | 22 | 282 CGAGGTAGTAGGTTGTGTGGTT      | miRNA | let-7b      |
| t0001303 | 20 | 281 AAACCGTTACCATTACTTAG        | miRNA | miR-451     |
| t0001301 | 23 | 281 TGAGGGGCAGAGAGCGATACTTT     | miRNA | miR-423-5p  |
| t0001300 | 23 | 280 TTGAAGACTGAAGTGGAGAAGGG     | miRNA | miR-3526    |
| t0001305 | 22 | 280 TGGAGAGAAAGGCGGTTCTCTGA     | miRNA | miR-185     |
| t0001306 | 20 | 280 TATGGCACTGGTAGAATTC A       | miRNA | miR-183     |
| t0001307 | 23 | 279 AAACCTTACCATTACTGAGTTT      | miRNA | miR-451     |
| t0001310 | 22 | 279 TGAGGGGCAGAGAGCGAGAATT      | miRNA | miR-423-5p  |
| t0001308 | 23 | 279 TGGAGAGAAAGGCAGTTCCTGCA     | miRNA | miR-185     |
| t0001312 | 21 | 278 GTGGAAGGTAGACGGCCAGAG       | miRNA | miR-3190    |
| t0001316 | 22 | 278 TAGCAGCACATTATGGTTTACA      | miRNA | miR-15b     |
| t0001317 | 25 | 278 TGAGGTAGTAGGTTGTGTGGTTAAA   | miRNA | let-7b      |
| t0001315 | 20 | 277 TCTGGGCACAGGCGGATGGA        | miRNA | miR-5107    |
| t0001314 | 21 | 277 AAACCGTTACCATTACCGAGT       | miRNA | miR-451     |
| t0001319 | 20 | 277 AACGGAATCCCAAAGCAGC         | miRNA | miR-191     |
| t0001321 | 21 | 277 TAGCAGCACGTAAATATTGGG       | miRNA | miR-16      |
| t0001322 | 21 | 277 TGAGGTAGTAGATTGTATACT       | miRNA | let-7f      |

|          |    |                                 |       |              |
|----------|----|---------------------------------|-------|--------------|
| t0001324 | 21 | 276 TGAGGTAGAAGATTGTATAGT       | miRNA | let-7f       |
| t0001326 | 26 | 275 TTGAAGACTGAAGTGGAGAAGGGTTT  | miRNA | miR-3526     |
| t0001332 | 20 | 274 TAGCAGAACATCATGGTTTA        | miRNA | miR-15b      |
| t0001330 | 21 | 273 TCCTGTAAGTACTGAGCTGCCCGT    | miRNA | miR-486-5p   |
| t0001328 | 22 | 273 AGAGGTAGTAGATTGTATAGTT      | miRNA | let-7f       |
| t0001334 | 22 | 272 AAACCGTCACCATTACTGAGTT      | miRNA | miR-451      |
| t0001333 | 24 | 271 TCCTGTAAGTACTGAGCTGCCCGAGTT | miRNA | miR-486-5p   |
| t0001335 | 24 | 271 AAACCTTTACCATTACTGAGTTTA    | miRNA | miR-451      |
| t0001341 | 22 | 270 TCCTGTAAGTACTGAGCTGCCTTGAG  | miRNA | miR-486-5p   |
| t0001342 | 21 | 270 AAACCGTTACCATTACTAAGT       | miRNA | miR-451      |
| t0001339 | 21 | 270 AAACCGTTAACATTACTGAGT       | miRNA | miR-451      |
| t0001337 | 24 | 270 AAAAGCTGGGTTGAGAGGGCGAGA    | miRNA | miR-320a     |
| t0001344 | 22 | 270 TAGCAGCACGGAAATATTGGCG      | miRNA | miR-16       |
| t0001345 | 23 | 270 ACCACAGGGTAGAACCACGGATT     | miRNA | miR-140      |
| t0001348 | 21 | 270 TGAGTTAGTAGGTTGTGTGGT       | miRNA | let-7b       |
| t0001351 | 20 | 269 TCTCCCTTCTGCCCTGGCT         | miRNA | miR-4685-3p  |
| t0001354 | 23 | 269 TGAGGGGCAGAGCGCGAGACTTT     | miRNA | miR-423-5p   |
| t0001353 | 22 | 269 TAGCAGCGCGTAAATATTGGCG      | miRNA | miR-16       |
| t0001358 | 21 | 268 TCTGGGCACAGCGGATGGAC        | miRNA | miR-5107     |
| t0001361 | 21 | 268 TGAGGTATTAGGTTGTGTGGT       | miRNA | let-7b       |
| t0001362 | 23 | 268 TGAGGTAGTAGTTGTATAGTAA      | miRNA | let-7-5p     |
| t0001366 | 20 | 267 TTGTAAGTACTGAGCTGCCCGAG     | miRNA | miR-486-5p   |
| t0001364 | 23 | 267 TACCACAGGGTAGAACCACGGAT     | miRNA | miR-140      |
| t0001372 | 23 | 266 TGAGGGGCAGAGATCGAGACTTT     | miRNA | miR-423-5p   |
| t0001365 | 23 | 266 TGGAGAGAAAGGCAGTTCCTGGA     | miRNA | miR-185      |
| t0001371 | 23 | 265 TTGGGGAAACGGCCGCTGAGTGA     | miRNA | miR-2110     |
| t0001363 | 20 | 265 TGAGGCAGTAGATTGTATAG        | miRNA | let-7f       |
| t0001367 | 21 | 265 TGAGGTAGTAGATTGTGTGGT       | miRNA | let-7b       |
| t0001376 | 20 | 264 TCTCCAACCCTGTACCAG          | miRNA | miR-150      |
| t0001377 | 20 | 264 TACCGCACTGTGGGTACTTG        | miRNA | miR-106b*    |
| t0001374 | 20 | 264 TGAGGTAGTAGATCGTATAG        | miRNA | let-7f       |
| t0001378 | 24 | 263 AAAAGCTGGGTTGAGAGGGCGTTT    | miRNA | miR-320d     |
| t0001381 | 19 | 263 TGGCTCAGTTCAGCAGGAA         | miRNA | miR-24       |
| t0001379 | 24 | 263 GACTGGGGCGGTACATCTGTTAAA    | miRNA | miR-219-2-3p |
| t0001383 | 22 | 263 TAGCAGCACGTAATATCGGCG       | miRNA | miR-16       |
| t0001382 | 21 | 263 ACCACAGGGAAGAACCACGGA       | miRNA | miR-140      |
| t0001387 | 22 | 263 TGAGGAAGTAGGTTGTATAGTT      | miRNA | let-7        |
| t0001385 | 22 | 261 TGAGGGGCAGAGAGTGAGACTT      | miRNA | miR-423-5p   |
| t0001388 | 24 | 261 TTGGGGAAACGGCCGCTGAGTGAG    | miRNA | miR-2110     |
| t0001390 | 21 | 261 TGGAGAGAAAGGCAGTACTG        | miRNA | miR-185      |
| t0001391 | 26 | 261 TACCCTGTAGATCCGAATTTGTGATC  | miRNA | miR-10       |
| t0001394 | 22 | 261 TGAGGTAGTAGGTTGTCTGGTT      | miRNA | let-7b       |
| t0001393 | 22 | 260 TAGCAGCACATCATGGTTTACC      | miRNA | miR-15b      |
| t0001397 | 21 | 260 TAGCAGCACATAATGGGTTGT       | miRNA | miR-15a      |
| t0001405 | 24 | 260 AAGCAGCATTGTACAGGGCTATGA    | miRNA | miR-103a     |
| t0001406 | 22 | 260 AGCAGCATTGTACATGGCTATG      | miRNA | miR-103a     |
| t0001404 | 21 | 260 TGATGTAGTAGGTTGTGTGGT       | miRNA | let-7b       |
| t0001402 | 22 | 259 TGAGGTAGCAGGTTGTGTGGTT      | miRNA | let-7b       |
| t0001400 | 21 | 259 TGAGGTGGTAGGTTGTGTGGT       | miRNA | let-7b       |
| t0001401 | 24 | 258 TTTGGCAATGGTAGAACTCACACT    | miRNA | miR-182      |
| t0001410 | 21 | 258 TGATGTAGTAGATTGTATAGT       | miRNA | let-7f       |
| t0001408 | 23 | 256 TCCTGTAAGTACTGAGCTGCCCGAGG  | miRNA | miR-486-5p   |
| t0001407 | 23 | 256 TCCTGTAAGTACTGAGCTGTCCCGAGA | miRNA | miR-486-5p   |
| t0001411 | 22 | 256 AGGGGCAGAGAGCCGAGACTTTT     | miRNA | miR-423-5p   |
| t0001409 | 25 | 255 TAGCTTATCAGACTGATGTTGAATC   | miRNA | miR-21       |
| t0001419 | 22 | 255 TACCAGCACGTAATATTGGCG       | miRNA | miR-16       |
| t0001413 | 22 | 255 GGAGGTAGTAGATTGTATAGTT      | miRNA | let-7f       |
| t0001412 | 23 | 254 AAAAGCTGGGTTGAGAGGGCATA     | miRNA | miR-320d     |

|          |    |                                  |       |              |
|----------|----|----------------------------------|-------|--------------|
| t0001414 | 22 | 253 TCCTGTATTGAGCTGCCCCGAG       | miRNA | miR-486-5p   |
| t0001415 | 19 | 253 AACATTCATTGCTGTCGGT          | miRNA | miR-181b     |
| t0001422 | 22 | 252 TCCTGTA CTGAGCTCCCCCGAG      | miRNA | miR-486-5p   |
| t0001423 | 21 | 251 GAGGTAGTAGGTTGTGTGGTT        | miRNA | let-7b       |
| t0001424 | 21 | 250 ATTGCACTTGTC CCGCCTGT        | miRNA | miR-92c      |
| t0001425 | 21 | 250 TGGAGAGAAAGGCAGTTTTTG        | miRNA | miR-185      |
| t0001427 | 21 | 250 TGAGATGAAGCACTGTAGATC        | miRNA | miR-143      |
| t0001428 | 21 | 250 TGAGGTAGTAGGTTCTGTGGT        | miRNA | let-7b       |
| t0001429 | 22 | 249 TGAGGGGCAGAGAGCTAGACTT       | miRNA | miR-423-5p   |
| t0001430 | 22 | 249 TGGATAGAAAGGCAGTTCCTGA       | miRNA | miR-185      |
| t0001432 | 23 | 249 TACCACAGGGTAGAACCAAGGAC      | miRNA | miR-140      |
| t0001431 | 23 | 249 TGAGGTAGTAGGTTGTGTGGATC      | miRNA | let-7b       |
| t0001436 | 19 | 248 TAGCAGCGGGAACAGTTCT          | miRNA | miR-503      |
| t0001438 | 23 | 248 AAAAGCTGGGTTGAGAGGGCGGT      | miRNA | miR-320d     |
| t0001440 | 22 | 248 AAAGTGCTTACAGTGCAGGTAG       | miRNA | miR-17       |
| t0001441 | 24 | 248 TACCACAGGGTAGAATCACGGACA     | miRNA | miR-140      |
| t0001443 | 21 | 248 TGAGGTAGTAGATTGTAAAGT        | miRNA | let-7f       |
| t0001447 | 22 | 247 TGAGGGGCAGAGAGCGAGCCTT       | miRNA | miR-423-5p   |
| t0001448 | 22 | 247 AGCAGTATTGTACAGGGCTATG       | miRNA | miR-103a     |
| t0001446 | 21 | 246 AAACCGTTATCATTACTGAGT        | miRNA | miR-451      |
| t0001445 | 26 | 246 AAACCGTTACCATTACTGAGTTTAGA   | miRNA | miR-451      |
| t0001455 | 20 | 246 CGAGGTAGTAGATTGTATAG         | miRNA | let-7f       |
| t0001453 | 22 | 245 TGAGGGGCAGATAGCGAGACTT       | miRNA | miR-423-5p   |
| t0001450 | 22 | 245 TGGAGAGCAAGGCAGTTCCTGA       | miRNA | miR-185      |
| t0001452 | 25 | 245 TACCACAGGGTAGAACACGGACAA     | miRNA | miR-140      |
| t0001461 | 21 | 245 TGCGGTAGTAGATTGTATAGT        | miRNA | let-7f       |
| t0001457 | 21 | 244 CCACAGGGTAGAACACGGAT         | miRNA | miR-140      |
| t0001460 | 23 | 244 TGAGGTAGTAGATTGTATAGTGA      | miRNA | let-7f       |
| t0001459 | 23 | 243 GACTGGGGCGGTACATCTGTAA       | miRNA | miR-219-2-3p |
| t0001458 | 21 | 243 AGACCTACTTATCTACCAACA        | miRNA | miR-1839-3p  |
| t0001463 | 24 | 243 TCAGTGCATGACAGAACTTGGATC     | miRNA | miR-152      |
| t0001464 | 23 | 242 CAAAGTGCTGTTCTGTCAGGTAA      | miRNA | miR-93       |
| t0001467 | 22 | 242 TAGCAGCACATAATGGTTTGTGA      | miRNA | miR-15a      |
| t0001468 | 23 | 242 TACCACAGGGTAGAAACACGGAC      | miRNA | miR-140      |
| t0001469 | 20 | 242 CTATACGACCTGCTGCCTTT         | miRNA | let-7d*      |
| t0001476 | 21 | 238 TCCTGTA CTGAGCTGCTGCGA       | miRNA | miR-486-5p   |
| t0001472 | 26 | 238 TGAGGTAGTAGGTTGTATGGTTAATC   | miRNA | let-7b       |
| t0001473 | 20 | 237 TCCTGTA CTGAGCTGCCCTG        | miRNA | miR-486-5p   |
| t0001470 | 24 | 237 GAAAAGCTGGGTTGAGAGGGCGTA     | miRNA | miR-320d     |
| t0001479 | 24 | 237 AAAAGCTGGGTTGAGAGGGCGGTA     | miRNA | miR-320d     |
| t0001480 | 20 | 237 TGAGGTAGTAGATTGTATAT         | miRNA | let-7f       |
| t0001483 | 22 | 237 TGAGGCAGTAGGTTGTATAGTT       | miRNA | let-7        |
| t0001481 | 23 | 236 AAACCGTTATCATTACTGAGTTT      | miRNA | miR-451      |
| t0001484 | 22 | 234 TGAGGTAGTAGTTGTGTGGTT        | miRNA | let-7b       |
| t0001490 | 27 | 233 TGAAGACTGAAGTG GAGAAGGGTTTCT | miRNA | miR-3526     |
| t0001491 | 23 | 233 AAAAGCTGGGTTGAGAGGGCGCT      | miRNA | miR-320d     |
| t0001486 | 23 | 233 TGTA AACATCCCCGACTGGAAGA     | miRNA | miR-30d      |
| t0001487 | 22 | 232 TAGCAACACGTA AATATTGGCG      | miRNA | miR-16       |
| t0001498 | 22 | 232 TGAGGTAGTAGGTTGCGTGGTT       | miRNA | let-7b       |
| t0001499 | 22 | 231 AAACCGTTAACATTACTGAGTT       | miRNA | miR-451      |
| t0001500 | 20 | 230 TGAGGAAGTAGATTGTATAG         | miRNA | let-7f       |
| t0001503 | 21 | 230 TGAGGTAGTAGGTTGTATTGT        | miRNA | let-7        |
| t0001505 | 21 | 229 TGAGAACCACGTCTGCTCTGA        | miRNA | miR-589      |
| t0001502 | 22 | 229 TAGCAGCAAGTAAATATTGGCG       | miRNA | miR-16       |
| t0001504 | 21 | 229 TAGCAGCACGTA AATATTGTG       | miRNA | miR-16       |
| t0001507 | 23 | 229 ACCACAGGGTAGAACACGGAGA       | miRNA | miR-140      |
| t0001512 | 22 | 228 ATGACACGATCACTCCCGTTGA       | miRNA | miR-425-5p   |
| t0001515 | 23 | 228 TGAGGGGCAGAGAGCCAGACTTT      | miRNA | miR-423-5p   |

|          |    |                               |       |             |
|----------|----|-------------------------------|-------|-------------|
| t0001513 | 21 | 228 TTATAATACAACCTGATAAGT     | miRNA | miR-374a    |
| t0001514 | 25 | 227 TGGAGAGAAAGGCAGTTCCTGAAAA | miRNA | miR-185     |
| t0001521 | 22 | 227 TACTACAGGGTAGAACCACGGA    | miRNA | miR-140     |
| t0001518 | 22 | 227 AGAGGTAGTAGGGTGCATAGTT    | miRNA | let-7d      |
| t0001523 | 20 | 226 ATATAATACAACCTGCTAAG      | miRNA | miR-374     |
| t0001527 | 23 | 226 TAGCAGCACATCATGGTTTACAA   | miRNA | miR-15b     |
| t0001528 | 23 | 226 ACCACAGGGTAGAACCACGGATG   | miRNA | miR-140     |
| t0001529 | 21 | 225 TGAGGGGCAGAGATCGAGACT     | miRNA | miR-423-5p  |
| t0001531 | 21 | 225 TGGAGAGAAAGGCAGTTTCTG     | miRNA | miR-185     |
| t0001533 | 22 | 225 TAGAGAGAAAGGCAGTTCCTGA    | miRNA | miR-185     |
| t0001530 | 23 | 224 TCCTGTACTGAGCTGCTCCGAGA   | miRNA | miR-486-5p  |
| t0001541 | 21 | 224 TCCTGTATTGAGCTGCCCCGA     | miRNA | miR-486-5p  |
| t0001536 | 20 | 224 TAGGTAGTAGATTGTATAGT      | miRNA | let-7f      |
| t0001543 | 20 | 224 TGAGGTAGTAGTTTGTATAG      | miRNA | let-7f      |
| t0001548 | 21 | 222 TGAGGGGTAGAGAGCGAGACT     | miRNA | miR-423-5p  |
| t0001547 | 23 | 222 AAAAGCTGGGTTGAGAGGGCGAC   | miRNA | miR-320a    |
| t0001545 | 20 | 222 TGTA AACATCCCCGACTGGA     | miRNA | miR-30d     |
| t0001549 | 22 | 222 TCAGTGCATGACAGAACTTGGT    | miRNA | miR-152     |
| t0001555 | 21 | 221 ACCACAGGGTAGAACCAAGGA     | miRNA | miR-140     |
| t0001552 | 22 | 221 CCACAGGGTAGAACCACGGACT    | miRNA | miR-140     |
| t0001558 | 21 | 221 TGAGGTAGTAGTTTGTGCTTT     | miRNA | let-7i      |
| t0001556 | 22 | 221 TGAGGTAGGAGTTGTATAGTT     | miRNA | let-7       |
| t0001560 | 25 | 220 TGGCTCAGTTCAGCAGGAACAGATC | miRNA | miR-24b     |
| t0001563 | 22 | 218 AAACCGTTATCATTACTGAGTT    | miRNA | miR-451     |
| t0001564 | 23 | 218 CGAGGGGCAGAGAGCGAGACTTT   | miRNA | miR-423-5p  |
| t0001562 | 20 | 218 TAGCAGCACATCATGGTTTT      | miRNA | miR-15c     |
| t0001565 | 23 | 218 AGCAGCATTGTACAGGGCTATTT   | miRNA | miR-107     |
| t0001570 | 21 | 217 AGCAGCATTGTACAGGGCTAG     | miRNA | miR-103a    |
| t0001571 | 22 | 217 TGAGGTAGTAGGTTGTGTGGTC    | miRNA | let-7b      |
| t0001569 | 22 | 215 AAACCGTTACCATTACTGAGGT    | miRNA | miR-451     |
| t0001568 | 24 | 215 TAGCAGCAGTAAATATTGGCGAG   | miRNA | miR-16      |
| t0001574 | 23 | 215 TCAGTGCCTACAGAACTTTGAA    | miRNA | miR-148a    |
| t0001575 | 21 | 215 AGCAGCATTGTACAGGGTTAT     | miRNA | miR-103a    |
| t0001572 | 21 | 215 TGAGGTAATAGATTGTATAGT     | miRNA | let-7f      |
| t0001576 | 21 | 215 TGAGGTAGCAGGTTGTGTGGT     | miRNA | let-7b      |
| t0001582 | 22 | 214 TGGAGAGAAAGGCACTTCCTGA    | miRNA | miR-185     |
| t0001589 | 21 | 214 AGCAGCATTGTACAGGGCTTT     | miRNA | miR-107b    |
| t0001586 | 22 | 213 TAAAGTGCTGACAGTGCAGATT    | miRNA | miR-106b    |
| t0001584 | 21 | 212 GCCCCTGGCCTATCCTAGAA      | miRNA | miR-331     |
| t0001585 | 24 | 212 AATCTGAGAAGGCGCACAAAGGTTT | miRNA | miR-3200-5p |
| t0001593 | 22 | 212 TAACAGCACGTAATATTGGCG     | miRNA | miR-16      |
| t0001590 | 24 | 211 TCCTGTACTGAGCTGCCCCGAGGA  | miRNA | miR-486-5p  |
| t0001606 | 23 | 211 TGGAATGTAAAGAAGTATGTATC   | miRNA | miR-1a      |
| t0001601 | 22 | 211 TAGCAGCACATCATGGTTTATA    | miRNA | miR-15b     |
| t0001598 | 22 | 211 CACCACAGGGTAGAACCACGGA    | miRNA | miR-140     |
| t0001604 | 22 | 210 TATTGCATTTGTCCCGCCTGT     | miRNA | miR-92a     |
| t0001599 | 23 | 210 TGAGGGGCAGAGAGCGGGACTTT   | miRNA | miR-423-5p  |
| t0001600 | 20 | 210 TGAGGTAGGAGATTGTATAG      | miRNA | let-7e      |
| t0001612 | 23 | 209 AAAAGCTGGGTTGAGAGGGCAAT   | miRNA | miR-320b    |
| t0001613 | 24 | 209 CTGACCTATGAATTGACAGCCAGT  | miRNA | miR-192     |
| t0001616 | 23 | 209 TAGCAGCACATAATGGTTTGTGG   | miRNA | miR-15a     |
| t0001623 | 22 | 209 AGAGGTAGTAGGTTGTATAGTT    | miRNA | let-7d      |
| t0001619 | 22 | 209 TAAGGTAGTAGGTTGTGTGGTT    | miRNA | let-7b      |
| t0001617 | 22 | 209 TGAGGTAGTGGGTTGTGTGGTT    | miRNA | let-7b      |
| t0001624 | 19 | 208 AGGGACGGGACGCGGTGCA       | miRNA | miR-92b*    |
| t0001628 | 20 | 208 TACGTCATCGTTGTCATCGT      | miRNA | miR-598     |
| t0001625 | 21 | 208 TGAGGGGCAGAGGGCGAGACT     | miRNA | miR-423-5p  |
| t0001627 | 22 | 208 AAAAGTCGGGTTGAGAGGGCGA    | miRNA | miR-320c    |

|          |    |                                |       |             |
|----------|----|--------------------------------|-------|-------------|
| t0001631 | 22 | 208 TGGAGAGAAAGGCAGCTCCTGA     | miRNA | miR-185     |
| t0001632 | 22 | 208 TAGCAGCACATCATGGGTTACA     | miRNA | miR-15b     |
| t0001630 | 22 | 208 TACCACAGGGTAGAATTACGGA     | miRNA | miR-140     |
| t0001635 | 20 | 207 TCTGTACTGAGCTGCCCCGA       | miRNA | miR-486-5p  |
| t0001634 | 23 | 207 AAACCGTTACCATTACTGAGTTG    | miRNA | miR-451     |
| t0001637 | 22 | 207 TGTGCAAATCCATGCAAACTG      | miRNA | miR-19b     |
| t0001639 | 22 | 207 TCTGACCTATGAATTGACAGCC     | miRNA | miR-192     |
| t0001636 | 22 | 207 TAGCAGCACCTAAATATTGGCG     | miRNA | miR-16      |
| t0001638 | 21 | 207 CATAAAGTAGAAAGCACCCT       | miRNA | miR-142-5p  |
| t0001646 | 23 | 207 TACCACAGGGTAGAATCACGGAC    | miRNA | miR-140     |
| t0001644 | 22 | 207 AGCAGCATTGTATAGGGCTATG     | miRNA | miR-103a    |
| t0001649 | 20 | 206 AACCGTTACCATTACTGAGT       | miRNA | miR-451     |
| t0001642 | 21 | 206 TGACCTATGAATTGACAGCTA      | miRNA | miR-192     |
| t0001641 | 21 | 206 TCAGTGCATGACAGAACTTGG      | miRNA | miR-152     |
| t0001647 | 20 | 205 TGGGGTAGTAGATTGTATAG       | miRNA | let-7f      |
| t0001645 | 21 | 204 TAGCAGCGGGAACAGTTCTGA      | miRNA | miR-503     |
| t0001650 | 21 | 204 AAACCGTTACCATTACTGCGT      | miRNA | miR-451     |
| t0001652 | 20 | 204 AAACCGTTACCATTACTAAG       | miRNA | miR-451     |
| t0001660 | 22 | 204 TGAGGTAGTACATTGTATAGTT     | miRNA | let-7f      |
| t0001653 | 24 | 204 TGAGGTAGTAGGTTGTGTGGTAGA   | miRNA | let-7b      |
| t0001654 | 23 | 203 TCCTGTACTGAGCTGCCCCGAAA    | miRNA | miR-486-5p  |
| t0001658 | 21 | 203 AACCGTTACCATTACTGAGTT      | miRNA | miR-451     |
| t0001656 | 24 | 203 TGAGGGGCAGAGAGCGAGACTTTG   | miRNA | miR-423-5p  |
| t0001651 | 21 | 203 AACATTCAACGCTGTCGGTGA      | miRNA | miR-181a    |
| t0001663 | 21 | 203 TGGGGTAGTAGGTTGTGTGGT      | miRNA | let-7b      |
| t0001664 | 21 | 203 CGAGGTAGTAGGTTGTGTGGT      | miRNA | let-7b      |
| t0001666 | 21 | 203 TGATGTAGTAGGTTGTATAGT      | miRNA | let-7       |
| t0001668 | 24 | 202 TCCTGTACTGAGCTGCCCCGACGG   | miRNA | miR-486-5p  |
| t0001676 | 22 | 202 AAACCGTTACCATTACTGGGTT     | miRNA | miR-451     |
| t0001670 | 22 | 202 TGAGGGGCAGACAGCGAGACTT     | miRNA | miR-423-5p  |
| t0001673 | 20 | 202 AAAGCTGGGTTGAGAGGGCA       | miRNA | miR-320b    |
| t0001671 | 23 | 202 CATTGCACTTGTCTCGGTCTGAT    | miRNA | miR-25      |
| t0001675 | 26 | 202 TGGCTCAGTTCAGCAGGAACAGTATC | miRNA | miR-24      |
| t0001685 | 20 | 202 GCAGCACGTAATATTGGCG        | miRNA | miR-16      |
| t0001686 | 21 | 202 TACAGTACTGTGATAACTGAC      | miRNA | miR-101c    |
| t0001678 | 22 | 201 TAGCGGCACGTAATATTGGCG      | miRNA | miR-16      |
| t0001680 | 21 | 200 TGGGTTTACGTTGGGAGAACT      | miRNA | miR-629     |
| t0001687 | 21 | 200 AAACAGTTACCATTACTGAGT      | miRNA | miR-451     |
| t0001688 | 20 | 200 GAGGGGCAGAGAGCGAGACT       | miRNA | miR-423-5p  |
| t0001681 | 21 | 200 TGAGATAGTAGATTGTATAGT      | miRNA | let-7f      |
| t0001692 | 23 | 199 TGAGGGGCAGAGAGCAAGACTTT    | miRNA | miR-423-5p  |
| t0001694 | 23 | 199 TGAGGGGCAGAGAGCGAGACTTT    | miRNA | miR-423-5p  |
| t0001689 | 20 | 199 CTGTGCGTGTGACAGCGGCT       | miRNA | miR-210     |
| t0001693 | 22 | 199 TCAGTGCATCACAGAACTTTGT     | miRNA | miR-148b-3p |
| t0001691 | 18 | 199 TCAGTGCATCACAGAACT         | miRNA | miR-148b-3p |
| t0001698 | 18 | 199 TGAGGTAGTAGATTATAG         | miRNA | let-7f      |
| t0001695 | 22 | 198 ATTCTAATTTCTCCACGTCTTT     | miRNA | miR-576-5p  |
| t0001697 | 23 | 198 AAAAGCTGGGTTGAGAGGGCATT    | miRNA | miR-320d    |
| t0001704 | 26 | 198 TAGCAGCACGTAATATTGGCGAAAA  | miRNA | miR-16      |
| t0001708 | 18 | 198 CATAAAGTAGAAAGCACT         | miRNA | miR-142-5p  |
| t0001714 | 22 | 198 AGCAGCATTGTACAGGGCTAAT     | miRNA | miR-107     |
| t0001707 | 22 | 198 TAAAGTGCTGACAGTGCAGAAA     | miRNA | miR-106b    |
| t0001710 | 22 | 197 TATTGCACTTGTCTCGGTCTGA     | miRNA | miR-25      |
| t0001715 | 21 | 197 TGAGGAAGTAGGTTGTATAGT      | miRNA | let-7       |
| t0001720 | 19 | 196 TACGTCATCGTTGTCATCG        | miRNA | miR-598     |
| t0001719 | 22 | 196 TGGAGAGAAAGGCAATTCCTGA     | miRNA | miR-185     |
| t0001721 | 21 | 196 TGAGGTAGTAGATTGTCTAGT      | miRNA | let-7f      |
| t0001724 | 22 | 195 TACCATTGCATATCGGAGTTG      | miRNA | miR-660     |



|          |    |                                |       |            |
|----------|----|--------------------------------|-------|------------|
| t0001716 | 21 | 195 TCAGGTAGTAGATTGTATAGT      | miRNA | let-7f     |
| t0001734 | 19 | 194 AAGGGCTGGGTCCGGTCGGG       | miRNA | miR-4651   |
| t0001732 | 22 | 194 TGGAGAGAAAGGCAGTAGTTGA     | miRNA | miR-4306   |
| t0001733 | 21 | 194 TGGAGAGAAAGGCAGTTCCTT      | miRNA | miR-185    |
| t0001731 | 22 | 194 TAGCAGCACGTAATCTTGGCG      | miRNA | miR-16     |
| t0001729 | 22 | 194 TAGCAGCCCGTAAATATTGGCG     | miRNA | miR-16     |
| t0001727 | 20 | 194 CAGCATTGTACAGGGCTATG       | miRNA | miR-103a   |
| t0001736 | 21 | 193 TATTGCACTCGTCCCGGCCCTT     | miRNA | miR-92     |
| t0001735 | 20 | 193 AAACCCTTACCATTACTGAG       | miRNA | miR-451    |
| t0001741 | 24 | 193 AAACCGTTACCATTACTGAGTTTG   | miRNA | miR-451    |
| t0001738 | 23 | 193 AAACCGTCACCATTACTGAGTTT    | miRNA | miR-451    |
| t0001742 | 24 | 193 TGACCTATGAATTGACAGCCAGAA   | miRNA | miR-192    |
| t0001744 | 23 | 193 CTGACCTATGAATTGACAGCATC    | miRNA | miR-192    |
| t0001747 | 22 | 193 CCCATAAAGTAGAAAGCACTAA     | miRNA | miR-142    |
| t0001753 | 26 | 193 TGGAATGTAAAGAAGTATGTACCATC | miRNA | miR-1-3p   |
| t0001748 | 24 | 193 TGAGGTAGTAGGTTGTATAGTTAA   | miRNA | let-7      |
| t0001751 | 23 | 192 AGGTGGAAGGTTGTAGGCATGTA    | miRNA | miR-965-5p |
| t0001749 | 21 | 192 TGAGGGGCAGAGAGCGCGACT      | miRNA | miR-423-5p |
| t0001756 | 20 | 192 TAGCTTATCAGACTGATGTT       | miRNA | miR-21     |
| t0001754 | 22 | 192 TAAAGTGCTGACAGTGCAGATG     | miRNA | miR-106b   |
| t0001760 | 21 | 192 AGCAGTATTGTACAGGGCTAT      | miRNA | miR-103a   |
| t0001758 | 22 | 191 TGAGGTAGTAAGTTGTATTGTT     | miRNA | miR-98     |
| t0001762 | 21 | 191 CATGCCCTTGAGTGTAGGACCG     | miRNA | miR-532-5p |
| t0001766 | 24 | 191 TCCTGTA CTGAGCTGCCCCGAAGA  | miRNA | miR-486-5p |
| t0001761 | 22 | 191 TACCACAGCGTAGAACCCACGGA    | miRNA | miR-140    |
| t0001765 | 23 | 190 TAAAGTGCTGACAGTGCAGATAG    | miRNA | miR-106b   |
| t0001759 | 22 | 190 AGAGGTGGTAGGTTGCATAGTT     | miRNA | let-7d     |
| t0001767 | 22 | 189 TGGAGAGAAAGTCAGTTCCTGA     | miRNA | miR-185    |
| t0001768 | 25 | 189 TACAGTACTGTGATAGCTGAAGATC  | miRNA | miR-101    |
| t0001770 | 20 | 189 TGAGGTAGTAGTTTGTGTTG       | miRNA | let-7i     |
| t0001776 | 20 | 189 TGAGGTAGTAGATTGTATTG       | miRNA | let-7f     |
| t0001778 | 20 | 188 AAAGTGTACCATTACTGAG        | miRNA | miR-451    |
| t0001771 | 22 | 188 TAGCAGGACGTAATATTGGCG      | miRNA | miR-16     |
| t0001772 | 22 | 188 TACTAGACTGAAGCTCCTTGAG     | miRNA | miR-151-3p |
| t0001785 | 18 | 187 TGTACTGAGCTGCCCCGA         | miRNA | miR-486-5p |
| t0001782 | 23 | 187 TGAGGAGCAGAGAGCGAGACTTT    | miRNA | miR-423-5p |
| t0001783 | 23 | 187 TCACACAGAAATCGCACCCGTCA    | miRNA | miR-342-3p |
| t0001781 | 20 | 186 TCTCTCGGCTCCTCGCGCT        | miRNA | miR-3615   |
| t0001789 | 22 | 186 TTGAAGACTGAAGTGGAGAAGG     | miRNA | miR-3526   |
| t0001786 | 19 | 186 AACGGAATCCAAAAGCAG         | miRNA | miR-191    |
| t0001792 | 22 | 186 TAGCAGCACGTGAATATTGGCG     | miRNA | miR-16     |
| t0001794 | 20 | 186 TACCACAGGGTAGAACCCACG      | miRNA | miR-140    |
| t0001796 | 24 | 185 TTCACAGTGGCTAAGTTCTGCATC   | miRNA | miR-27b    |
| t0001795 | 23 | 185 TTCAAGTAATCCAGGATAGGATC    | miRNA | miR-26a    |
| t0001809 | 22 | 185 CATTGTA CTGTCTCGGTCTGA     | miRNA | miR-25     |
| t0001804 | 22 | 185 TGAGGTAGTAGGTTGTATTGTT     | miRNA | let-7      |
| t0001798 | 19 | 184 TGTACTGAGCTGCCCCGAG        | miRNA | miR-486-5p |
| t0001812 | 21 | 184 AAACCGTCACCATTACTGAGT      | miRNA | miR-451    |
| t0001810 | 24 | 184 CTGGA CTGGAGTCAGAAGGCATC   | miRNA | miR-378    |
| t0001811 | 23 | 184 TAAAGTGCTGACAGTGCAGATAA    | miRNA | miR-106b   |
| t0001815 | 22 | 184 TACAGTACTGTGATAACTGACA     | miRNA | miR-101c   |
| t0001817 | 21 | 184 TGAGGTCGTAGATTGTATAGT      | miRNA | let-7f     |
| t0001821 | 21 | 184 TGAGGTAGTAGGCTGTGTGGT      | miRNA | let-7b     |
| t0001814 | 20 | 183 TAGCAGCGGGAACAGTTCTG       | miRNA | miR-503    |
| t0001816 | 22 | 183 ATCCTGTA CTGAGCTGCCCCGA    | miRNA | miR-486-5p |
| t0001823 | 23 | 183 TGAGGGGCAGAGAGCGAGACTCT    | miRNA | miR-423-5p |
| t0001824 | 22 | 183 AAAAGCTGGGTTGAGAGGGTGA     | miRNA | miR-320d   |
| t0001828 | 25 | 183 TGGACGGAGA ACTGATAAGGGAATC | miRNA | miR-184-3p |

|          |    |                                |       |             |
|----------|----|--------------------------------|-------|-------------|
| t0001827 | 24 | 183 TACCACAGGGTAGAACTACGGACA   | miRNA | miR-140     |
| t0001837 | 24 | 183 TACCATAGGGTAGAACACCGGACA   | miRNA | miR-140     |
| t0001830 | 19 | 182 AGGGGCAGAGAGCGGAGACT       | miRNA | miR-423-5p  |
| t0001838 | 21 | 182 TGAGTGGCAGAGAGCGGAGACT     | miRNA | miR-423-5p  |
| t0001835 | 21 | 182 TTTGAGGCTACAGTGAGATGT      | miRNA | miR-1304    |
| t0001834 | 19 | 182 GTACAGTACTGTGATAACT        | miRNA | miR-101     |
| t0001833 | 22 | 182 TGAGGTAAGTGGTTGTGTGGTT     | miRNA | let-7b      |
| t0001832 | 21 | 182 TGAGGCAGTAGGTTGTATAGT      | miRNA | let-7       |
| t0001845 | 21 | 181 TGAGGGGCAGAGAGCCGAGACT     | miRNA | miR-423-5p  |
| t0001843 | 24 | 181 CTTTGAAGACTGAAGTGGAGAAGG   | miRNA | miR-3526    |
| t0001839 | 21 | 181 CATTGTACTTGTCTCGGTCTG      | miRNA | miR-25      |
| t0001848 | 22 | 181 CAACGGAATCTCAAAGCAGCT      | miRNA | miR-191     |
| t0001846 | 22 | 181 TCTCCCAACCCTTGACCAGTA      | miRNA | miR-150     |
| t0001844 | 20 | 181 TCAGTGCATCACAGAACTTT       | miRNA | miR-148b-3p |
| t0001847 | 21 | 181 TGAGGTAGTATATTGTATAGT      | miRNA | let-7f      |
| t0001863 | 21 | 180 TAGCACCATCTGAAATCGGTT      | miRNA | miR-29c     |
| t0001865 | 24 | 180 TGGAGAGAAAGGCAGTTCCTGAAT   | miRNA | miR-185     |
| t0001852 | 22 | 180 TGGAGAGAGAGGCAGTTCCTGA     | miRNA | miR-185     |
| t0001849 | 20 | 180 TAGCAGTACATCATGGTTTA       | miRNA | miR-15b     |
| t0001857 | 23 | 180 TACCACATGGTAGAACACCGGAC    | miRNA | miR-140     |
| t0001862 | 22 | 180 TGAATGTAAAGAAGTATGGAG      | miRNA | miR-1-3p    |
| t0001872 | 22 | 180 CTTCCCCACCCTCTCCTGCAGA     | miRNA | miR-1224-3p |
| t0001870 | 19 | 179 TATTGCACTCGTCCCGGCC        | miRNA | miR-92      |
| t0001868 | 21 | 179 AAACCGCTACCATTACTGAGT      | miRNA | miR-451     |
| t0001869 | 24 | 179 TCTCACACAGAAATCGCACCCGTT   | miRNA | miR-342-3p  |
| t0001874 | 22 | 179 TGAGGTAGTAGTTTTTACAGTT     | miRNA | let-7g      |
| t0001877 | 20 | 179 TGAGGTAGTAGGTTGTATTT       | miRNA | let-7       |
| t0001873 | 21 | 178 CACCTTGCCTACTCAGGTCT       | miRNA | miR-3200-3p |
| t0001888 | 22 | 178 TGAGGTAGTAGGTTGTGTGCTT     | miRNA | let-7b      |
| t0001883 | 21 | 177 TCCTGTACTGAGCTGCTTCGA      | miRNA | miR-486-5p  |
| t0001884 | 24 | 177 TGTAACATCCTTGACTGGAAGCT    | miRNA | miR-30e     |
| t0001887 | 19 | 177 AAGCTGCCAGTTGAAGAAC        | miRNA | miR-22-3p   |
| t0001885 | 22 | 177 TGAGGTAGTAGTTTGTGTTGTT     | miRNA | let-7i      |
| t0001881 | 22 | 177 TGAGGTAGTAGGTTGTTAGTT      | miRNA | let-7       |
| t0001882 | 24 | 176 AAAGATGCCACGCTATGTAGAATC   | miRNA | miR-741-3p  |
| t0001894 | 23 | 176 GCAAAGCACACGGCCTGCAGAGA    | miRNA | miR-330-3p  |
| t0001896 | 21 | 176 TGTGCAAATCCATGCAAACT       | miRNA | miR-19b     |
| t0001889 | 23 | 176 AGCAGCATTGTACATGGCTATGA    | miRNA | miR-103a    |
| t0001892 | 21 | 176 TACAGTATTGTGATAACTGAA      | miRNA | miR-101     |
| t0001895 | 20 | 176 TGAGGTAGTAGGTTGTGTAG       | miRNA | let-7b      |
| t0001898 | 21 | 175 AAACCGTTACCATTACTGGGT      | miRNA | miR-451     |
| t0001901 | 22 | 175 AACCGTTACCATTACTGAGTTT     | miRNA | miR-451     |
| t0001906 | 22 | 175 TGGCAGCACGTAATATTGGCG      | miRNA | miR-16      |
| t0001908 | 22 | 175 TGAGGTAGTAGGTTCTATAGTT     | miRNA | let-7       |
| t0001907 | 26 | 174 AAACCTTTACCATTACTGAGTTTAGT | miRNA | miR-451     |
| t0001910 | 21 | 174 AAACCGTTACCATTAGTGAGT      | miRNA | miR-451     |
| t0001909 | 23 | 174 TGAGCGGCAGAGAGCGGAGACTTT   | miRNA | miR-423-5p  |
| t0001915 | 22 | 174 AAAAGCTGTGTTGAGAGGGCGA     | miRNA | miR-320a    |
| t0001914 | 22 | 174 TAGCAGCACGTAACATTGGCG      | miRNA | miR-16      |
| t0001918 | 22 | 174 TACAGTATAGATGATGTACTTT     | miRNA | miR-144     |
| t0001912 | 20 | 174 TGAGGTAGCAGATTGTATAG       | miRNA | let-7f      |
| t0001916 | 22 | 173 TCCTGTACTGAGCTGACCCGAG     | miRNA | miR-486-5p  |
| t0001917 | 22 | 173 CTGACCTATGAATTGACAGCCG     | miRNA | miR-192     |
| t0001926 | 21 | 173 ACCACAAGGTAGAACCACGGA      | miRNA | miR-140     |
| t0001928 | 20 | 173 TGAGGTAGTGGATTGTATAG       | miRNA | let-7f-5p   |
| t0001922 | 21 | 173 TGAGGTAGTAGATGGTATAGT      | miRNA | let-7f      |
| t0001923 | 22 | 173 TGCGGTAGTAGGTTGTGTGGTT     | miRNA | let-7b      |
| t0001930 | 23 | 172 TCCTGTACTGAGCTGCTTCGAGA    | miRNA | miR-486-5p  |

|          |    |     |                            |       |            |
|----------|----|-----|----------------------------|-------|------------|
| t0001934 | 21 | 172 | AGGGGCTGGCTTTCCTCTGGT      | miRNA | miR-185*   |
| t0001933 | 20 | 171 | TTCGGGGTCTGGGCGCGGCG       | miRNA | miR-4508   |
| t0001937 | 20 | 171 | AACATTCATTGCTGTCGGTG       | miRNA | miR-181b   |
| t0001935 | 22 | 171 | TAGCAGCACGTAAGTATTGGCG     | miRNA | miR-16     |
| t0001931 | 21 | 171 | TCGAGGAGCTCACAGTCTAGT      | miRNA | miR-151-5p |
| t0001932 | 23 | 171 | AGCAGTATTGTACAGGGCTATGA    | miRNA | miR-103a   |
| t0001948 | 19 | 170 | AAACCGTTACCATTACAGT        | miRNA | miR-451    |
| t0001945 | 20 | 170 | ATCACATTGCCAGGGATTAC       | miRNA | miR-23b    |
| t0001942 | 23 | 170 | TGGAGAGAAAGGCAGTTTCTGAT    | miRNA | miR-185    |
| t0001946 | 21 | 170 | TGAGTTAGTAGATTGTATAGT      | miRNA | let-7f     |
| t0001941 | 24 | 170 | TGAGGTAGTAGGTTGTGTGGTAAA   | miRNA | let-7b     |
| t0001944 | 21 | 169 | AAACCGTTACTATTACTGAGT      | miRNA | miR-451    |
| t0001953 | 22 | 169 | TAGCAGCACGTAACTATTGGCG     | miRNA | miR-16     |
| t0001950 | 22 | 169 | TAGCAGCACGTAGATATTGGCG     | miRNA | miR-16     |
| t0001955 | 19 | 169 | AGGTAGTAGATTGTATAGT        | miRNA | let-7f     |
| t0001961 | 22 | 169 | TGAGGTAGGAGTTGTGTGGTT      | miRNA | let-7b     |
| t0001960 | 21 | 169 | TGAGGTAGTAGGTTGTGTCGT      | miRNA | let-7b     |
| t0001959 | 22 | 169 | TGAGGTAGTGGGTTGTATAGTT     | miRNA | let-7      |
| t0001956 | 21 | 168 | TACCCATTGCATATCGGAGTT      | miRNA | miR-660    |
| t0001967 | 21 | 168 | TGAGGGGCAGAGCGCGAGACT      | miRNA | miR-423-5p |
| t0001973 | 23 | 168 | GGCTGGTCCGAGTGCAGTGGTGT    | miRNA | miR-3135b  |
| t0001970 | 21 | 168 | CTGACCTATGAATTGACAGCT      | miRNA | miR-192    |
| t0001972 | 23 | 168 | TGGAGAGAAAGGCATTTCTGAA     | miRNA | miR-185    |
| t0001975 | 20 | 168 | AGGTAGTAGATTGTATAGTT       | miRNA | let-7f     |
| t0001976 | 23 | 167 | AGGGACGGGACGCGGTGCAGTGT    | miRNA | miR-92b*   |
| t0001978 | 19 | 167 | AAACCGTTACCATTACTAG        | miRNA | miR-451    |
| t0001979 | 23 | 167 | AATTGCACGGTATCCATCTGTAA    | miRNA | miR-363    |
| t0001981 | 24 | 167 | TTTGAAGACTGAAGTGGAGAAGGG   | miRNA | miR-3526   |
| t0001983 | 26 | 167 | TGAGATGAAGCACTGTAGCTCTAATC | miRNA | miR-143    |
| t0001987 | 19 | 167 | TAAAGTGCTGACAGTGCAG        | miRNA | miR-106b   |
| t0001985 | 21 | 166 | TGTAAACATCCCCGACTGGAA      | miRNA | miR-30d    |
| t0001995 | 22 | 166 | CAACGGAATCCTAAAAGCAGCT     | miRNA | miR-191    |
| t0001988 | 22 | 166 | TGGAGAGAAAGGCAGGTCCTGA     | miRNA | miR-185    |
| t0001989 | 21 | 166 | TAGCAGCACATCATGGTTTAT      | miRNA | miR-15b    |
| t0001993 | 21 | 166 | TGAGGTGGTAGTTTGTGCTGT      | miRNA | let-7i     |
| t0001991 | 20 | 165 | TAAGGGCTGGGTCCGTCGGG       | miRNA | miR-4651   |
| t0001990 | 23 | 165 | TGAGAGGCAGAGAGCGAGACTTT    | miRNA | miR-423-5p |
| t0002005 | 23 | 165 | TACCACAGGGTAGAATTACGGAC    | miRNA | miR-140    |
| t0001998 | 20 | 165 | TGAGGTAGTAGATTGAATAG       | miRNA | let-7k     |
| t0002001 | 24 | 164 | AATGACACGATCACTCCC GTT GAG | miRNA | miR-425    |
| t0002000 | 21 | 164 | TTCCTATGCATATACTTCTTT      | miRNA | miR-202-5p |
| t0002004 | 25 | 164 | CAACGGAATCCCAAAGCAGCTGTT   | miRNA | miR-191    |
| t0002003 | 24 | 164 | AACATTC AACGCTGTCGGTGAATC  | miRNA | miR-181a   |
| t0002012 | 22 | 164 | TGGAGTGTGACAATGGTGT TTG    | miRNA | miR-122    |
| t0002013 | 22 | 163 | ATTGCACTTGTC CCGCCTGTA     | miRNA | miR-92b-3p |
| t0002011 | 22 | 163 | AAACCGTTACCATTACCGAGTT     | miRNA | miR-451    |
| t0002015 | 22 | 163 | TGAGGGGCAGAGACCGAGACTT     | miRNA | miR-423-5p |
| t0002009 | 21 | 163 | CGAGGGGCAGAGAGCGAGACT      | miRNA | miR-423-5p |
| t0002023 | 23 | 163 | AAAAGCTGGGTTGAGAGGGAGAA    | miRNA | miR-320d   |
| t0002025 | 22 | 163 | TGAAGAGAAAGGCAGTTCCTGA     | miRNA | miR-185    |
| t0002019 | 23 | 163 | AACATTC AACGCTGTCGGT GAGT  | miRNA | miR-181a   |
| t0002024 | 23 | 163 | TGAGA ACTGAATCCATAGGCTG    | miRNA | miR-146b   |
| t0002032 | 22 | 163 | TATCACAGGGTAGAAC CACGGA    | miRNA | miR-140    |
| t0002027 | 21 | 163 | GTGAGGACTCGGGAGGTGGAA      | miRNA | miR-1224   |
| t0002030 | 22 | 162 | AAACCGCTACCATTACTGAGTT     | miRNA | miR-451    |
| t0002029 | 22 | 162 | TGGAGAGAAACGCAGTTCCTGA     | miRNA | miR-185    |
| t0002031 | 22 | 162 | TATGGCACTGGTAGAAT TCACT    | miRNA | miR-183    |
| t0002041 | 20 | 162 | AGCAGCATTGTATAGGGCTA       | miRNA | miR-103a   |

|          |    |                                 |       |            |
|----------|----|---------------------------------|-------|------------|
| t0002048 | 21 | 162 TGAGGTAGTCGATTGTATAGT       | miRNA | let-7f     |
| t0002042 | 22 | 161 AACGGAATCTCAAAGCAGCTG       | miRNA | miR-191    |
| t0002045 | 23 | 161 TGGAGAGAAAGGCAGTTCCTGTT     | miRNA | miR-185    |
| t0002044 | 22 | 161 TAGCAGCACGTAATATTTTCG       | miRNA | miR-16     |
| t0002047 | 22 | 161 ACCACAGGGTATAACCACGGAC      | miRNA | miR-140    |
| t0002049 | 23 | 160 TGAGGGGCAGTGAGCGAGACTTT     | miRNA | miR-423-5p |
| t0002038 | 22 | 160 TGGAGACAAAGGCAGTTCCTGA      | miRNA | miR-185    |
| t0002046 | 20 | 160 TAGCAGCACACAATGGTTTG        | miRNA | miR-15a    |
| t0002039 | 22 | 160 TACCACAGGGTAGAACCACGGG      | miRNA | miR-140    |
| t0002053 | 21 | 160 TGAGCTAGTAGATTGTATAGT       | miRNA | let-7f     |
| t0002060 | 21 | 160 TGAGGTAGTAGGCTGTATAGT       | miRNA | let-7      |
| t0002055 | 23 | 159 AAAGTGTACCATTACTGAGTTT      | miRNA | miR-451    |
| t0002054 | 20 | 159 TAGCAGCACATAATGGTTT         | miRNA | miR-15a    |
| t0002059 | 25 | 159 CTAGACTGAAGCTCCTTGAGGAAGA   | miRNA | miR-151-3p |
| t0002066 | 22 | 159 AGCAGCATTGTACAGCGCTATG      | miRNA | miR-103a   |
| t0002067 | 23 | 159 TACAGTACTGTGATAACTGAAAA     | miRNA | miR-101    |
| t0002065 | 21 | 159 ATGAGGTAGTAGATTGTATAG       | miRNA | let-7f     |
| t0002062 | 22 | 158 TAGAGGAGATGGCGCAGGGGAA      | miRNA | miR-877    |
| t0002074 | 21 | 158 CATTATTACTTTTGGTACGCG       | miRNA | miR-126-5p |
| t0002075 | 24 | 158 TGAGGTAGTAGGTTGTGTGGTTGT    | miRNA | let-7b     |
| t0002072 | 20 | 157 AAACCGTCACCATTACTGAG        | miRNA | miR-451    |
| t0002070 | 20 | 157 AAAAGCTGGGTTGAGAGGGC        | miRNA | miR-320a   |
| t0002068 | 22 | 157 TTCAAGTAATCCAGGATAGGCG      | miRNA | miR-26a    |
| t0002069 | 22 | 157 TGGAGAGAAAGGCCGTTCTCTGA     | miRNA | miR-185    |
| t0002086 | 21 | 157 AAGGTAGATAGAACAGGTCTT       | miRNA | miR-1839   |
| t0002083 | 21 | 156 AATTGCACGGTATCCATCTGT       | miRNA | miR-363    |
| t0002077 | 24 | 156 AAAAGCTGGGTTGAGAGGGCGTTG    | miRNA | miR-320d   |
| t0002085 | 25 | 156 TTGGGGAAACGGCCGCTGAGTGAGA   | miRNA | miR-2110   |
| t0002080 | 24 | 156 TGGAGAGAAAGGCAGTTCCTGATA    | miRNA | miR-185    |
| t0002084 | 25 | 156 AGCAGCATTGTACAGGGCTATGAAA   | miRNA | miR-103a   |
| t0002087 | 22 | 156 TGAGGTAGTAGGTTGTGTGGCT      | miRNA | let-7b     |
| t0002090 | 23 | 155 TCCTGTACTGAGCTCCCCGAGT      | miRNA | miR-486-5p |
| t0002092 | 23 | 155 TGAGGGGCAGGGAGCGAGACTTT     | miRNA | miR-423-5p |
| t0002096 | 24 | 155 AAAAGCTGGGTTGAGAGGGCGTTA    | miRNA | miR-320d   |
| t0002099 | 22 | 155 TAACGGAATCCCAAAGCAGCT       | miRNA | miR-191    |
| t0002093 | 21 | 155 ACCACAGGTTAGAACCACGGA       | miRNA | miR-140    |
| t0002095 | 20 | 155 TGAGGTAGTACATTGTATAG        | miRNA | let-7f     |
| t0002094 | 22 | 155 TGAGGTAGTAGATGGTATAGTT      | miRNA | let-7f     |
| t0002105 | 20 | 155 TGAGGTAGTAGATTGTACAG        | miRNA | let-7f     |
| t0002113 | 22 | 154 AAACCGTTACCTTACTGAGTT       | miRNA | miR-451    |
| t0002107 | 22 | 154 TGAGGGGAAGAGAGCGAGACTT      | miRNA | miR-423-5p |
| t0002111 | 20 | 154 ATCACATTGCCAGGGATTAA        | miRNA | miR-23b    |
| t0002103 | 22 | 154 TGGAGAGTAAGGCAGTTCCTGA      | miRNA | miR-185    |
| t0002108 | 21 | 154 ACTGCAGTGAAGGCACTTGTA       | miRNA | miR-17*    |
| t0002126 | 19 | 154 TGAGGTAGTAGGTTGTGTT         | miRNA | let-7b     |
| t0002121 | 21 | 154 TGAGGTAGTAGGTTGCGTGGT       | miRNA | let-7b     |
| t0002124 | 22 | 153 TCCTGTACTGAGCTGCACCGAG      | miRNA | miR-486-5p |
| t0002114 | 19 | 152 AAACCGTTACCATTACTGT         | miRNA | miR-451    |
| t0002116 | 23 | 152 TGAGGGCCAGAGAGCGAGACTTT     | miRNA | miR-423-5p |
| t0002119 | 27 | 152 ACTTTGAAGACTGAAGTGGAGAAGGGT | miRNA | miR-3526   |
| t0002123 | 23 | 152 AAAAGCTGGGTTGAGATGGCGAA     | miRNA | miR-320a   |
| t0002125 | 20 | 152 TGGAGAGAAAGGCAGTTGAT        | miRNA | miR-185    |
| t0002127 | 20 | 152 TCACAGTGAACCGGTCTCTT        | miRNA | miR-128    |
| t0002128 | 22 | 152 TGAGGTGGTAGTTTGTACAGTT      | miRNA | let-7g     |
| t0002133 | 20 | 152 TGGTAGTAGATTGTATAGTT        | miRNA | let-7f     |
| t0002134 | 22 | 152 TGAGGTAGTAGGTTGTGTGGAG      | miRNA | let-7b     |
| t0002141 | 22 | 152 TGGGGTAGTAGGTTGTATAGTT      | miRNA | let-7      |
| t0002131 | 21 | 152 TGAGGTAGTAGGTTGTACAGT       | miRNA | let-7      |

|          |    |                                 |       |            |
|----------|----|---------------------------------|-------|------------|
| t0002137 | 23 | 151 TCCTG TACTGAGCTGCCCCGCGA    | miRNA | miR-486-5p |
| t0002146 | 24 | 151 TGGTAGACTATGGAACGTAGGATC    | miRNA | miR-379-5p |
| t0002154 | 25 | 151 AAATAGCAGCACGTAAATATTGGCG   | miRNA | miR-16     |
| t0002161 | 22 | 151 ACCACAGGGTAGAACTACGGAC      | miRNA | miR-140    |
| t0002162 | 21 | 151 TGAGGTAGTAGATTTTATAGT       | miRNA | let-7f     |
| t0002150 | 25 | 151 TGAGGTAGTAGGTTGTGTGGTTAAG   | miRNA | let-7b     |
| t0002158 | 22 | 151 CGAGGTAGTAGGTTGTATAGTT      | miRNA | let-7      |
| t0002151 | 23 | 150 TGAGGGGCAGAGAGCGAGACTAG     | miRNA | miR-423-5p |
| t0002163 | 23 | 150 TGAGGGGCAGAGAGCGAGACTAT     | miRNA | miR-423-5p |
| t0002152 | 27 | 150 TGGTAACTCCGAACCACCGTTGGCATC | miRNA | miR-2765   |
| t0002165 | 23 | 150 CTAGCAGCACGTAAATATTGGCG     | miRNA | miR-16     |
| t0002155 | 22 | 150 TAGCAGCACGTAATTATTGGCG      | miRNA | miR-16     |
| t0002166 | 20 | 150 TAGCAGCACATAATGGTTCG        | miRNA | miR-15a    |
| t0002172 | 25 | 150 TGAGGTAGTAGGTTGTGTGGTTAGT   | miRNA | let-7b     |
| t0002180 | 21 | 150 CGAGGTAGTAGGTTGTATAGT       | miRNA | let-7      |
| t0002173 | 21 | 149 TGAGGGGCAGACAGCGAGACT       | miRNA | miR-423-5p |
| t0002184 | 23 | 149 TGAGGGACAGAGAGCGAGACTTT     | miRNA | miR-423-5p |
| t0002178 | 21 | 149 ACCTGGCATAACAATGTAGATT      | miRNA | miR-221*   |
| t0002179 | 22 | 149 TGGAGAGAAAGGCAGATCCTGA      | miRNA | miR-185    |
| t0002169 | 22 | 149 AGAAGCATTGTACAGGGCTATG      | miRNA | miR-103a   |
| t0002191 | 23 | 149 TGAGGTAGTAGGTTGTATGGTTA     | miRNA | let-7c     |
| t0002192 | 21 | 148 TGAGGTGCAGAGAGCGAGACT       | miRNA | miR-423-5p |
| t0002200 | 23 | 148 CAACGGAATCCCAAAAGCAGCTA     | miRNA | miR-191    |
| t0002187 | 23 | 148 CAGTGCAATGTAAAAGGGCATA      | miRNA | miR-130a   |
| t0002189 | 20 | 148 GTACAGTACTGTGATAACTG        | miRNA | miR-101    |
| t0002196 | 23 | 148 CTGAGGTAGTAGTTTGTACAGTT     | miRNA | let-7g     |
| t0002194 | 23 | 147 TGAGGGGCATAGAGCGAGACTTT     | miRNA | miR-423-5p |
| t0002198 | 19 | 147 AACTTTGAAGACTGAAGTG         | miRNA | miR-3526   |
| t0002205 | 20 | 147 CCCATAAAGTAGAAAGCATT        | miRNA | miR-142    |
| t0002209 | 20 | 146 CCTCCACACCCAAGGCTTG         | miRNA | miR-532-3p |
| t0002211 | 22 | 146 TGGAGAGAAAGGCAGTGTTTGA      | miRNA | miR-4306   |
| t0002201 | 23 | 146 TGAGGGGTAGAGAGCGAGACTTT     | miRNA | miR-423-5p |
| t0002204 | 21 | 146 TGAAGGGCAGAGAGCGAGACT       | miRNA | miR-423-5p |
| t0002202 | 24 | 146 AACGGAATCCCAAAAGCAGCTGAA    | miRNA | miR-191    |
| t0002218 | 22 | 146 CTGGAGATATGGAAGAGCTGTG      | miRNA | miR-1270   |
| t0002229 | 22 | 146 TGAGGTAGTAGGTTTTGTGGTT      | miRNA | let-7b     |
| t0002223 | 22 | 145 TGAGTGGCAGAGAGCGAGACTT      | miRNA | miR-423-5p |
| t0002224 | 23 | 145 TTCAAGTAATCCAGGATAGGCAA     | miRNA | miR-26a    |
| t0002219 | 22 | 145 AGCTACATCTGGCTACTGGGTC      | miRNA | miR-222    |
| t0002238 | 23 | 145 TACCACAGGGTAGAACCACGGCT     | miRNA | miR-140    |
| t0002235 | 22 | 145 AGCAGCATTGTACAGTGCTATG      | miRNA | miR-103a   |
| t0002236 | 23 | 144 TGAGGGGCAGAGAGCGACACTTT     | miRNA | miR-423-5p |
| t0002244 | 23 | 144 TGGAGAGAAAGGCAGTTCCTGCT     | miRNA | miR-185    |
| t0002243 | 21 | 144 TAGCAGCACATAATGGTTTGA       | miRNA | miR-15a    |
| t0002239 | 22 | 144 TGAGGTAGTAGATTGTATAGAA      | miRNA | let-7f-5p  |
| t0002246 | 21 | 143 TTAAGACTTGCAGTGATGTTT       | miRNA | miR-499-5p |
| t0002245 | 22 | 143 AAACCGTTACCATTACTGCGTT      | miRNA | miR-451    |
| t0002248 | 24 | 143 AAAAGCTGGGTTGAGAGGGCGTAG    | miRNA | miR-320d   |
| t0002249 | 22 | 143 TACCACAGGGTAGAACCATGGA      | miRNA | miR-140    |
| t0002257 | 22 | 143 ACTCGGCGTGGCGTCGGTCGTG      | miRNA | miR-1307   |
| t0002259 | 22 | 143 TTTGAGGCTACAGTGAGATGTG      | miRNA | miR-1304   |
| t0002254 | 22 | 143 TGAGGTAGTAGTTTGTGCAGTT      | miRNA | let-7g     |
| t0002263 | 21 | 143 GTTGAGGTAGTAGATTGTATA       | miRNA | let-7f     |
| t0002255 | 21 | 143 TGAGGTAGTGGGTTGTGTGGT       | miRNA | let-7b     |
| t0002269 | 21 | 142 TATTGCACTTGTCCCGGCCAA       | miRNA | miR-92a    |
| t0002274 | 22 | 142 TCCTG TACTGAGCTGCTTCGAG     | miRNA | miR-486-5p |
| t0002266 | 23 | 142 TGAAGGGCAGAGAGCGAGACTTT     | miRNA | miR-423-5p |
| t0002273 | 22 | 142 TGTGACTTTAAGGGAAATGGCG      | miRNA | miR-3164   |

|          |    |                                |       |             |
|----------|----|--------------------------------|-------|-------------|
| t0002285 | 22 | 142 TGGAGCGAAAGGCAGTTCCTGA     | miRNA | miR-185     |
| t0002289 | 21 | 142 TGGAGAGAAAGGCAGTTCATG      | miRNA | miR-185     |
| t0002281 | 22 | 142 TGAGGTAGCAGGTTGTATAGTT     | miRNA | let-7       |
| t0002284 | 20 | 141 GAAGACTGAAGTGGAGAAGG       | miRNA | miR-739     |
| t0002278 | 21 | 141 TAAGGTGCATCTAGTGCAGAT      | miRNA | miR-18a     |
| t0002275 | 22 | 141 TGTAGAGAAAGGCAGTTCCTGA     | miRNA | miR-185     |
| t0002280 | 26 | 141 TGAGGTAGTAGTTTGTGCTGTTAATC | miRNA | let-7i      |
| t0002292 | 20 | 141 TGAGGTAGTAGATTGTATCG       | miRNA | let-7f      |
| t0002286 | 22 | 141 TGTGGTAGTAGGTTGTGTGGTT     | miRNA | let-7b      |
| t0002307 | 21 | 141 TGGGGTAGTAGGTTGTATAGT      | miRNA | let-7       |
| t0002297 | 19 | 140 CTCTTTTCTTTGAGACTCA        | miRNA | miR-627     |
| t0002299 | 22 | 140 ATCTGTACTGAGCTGCCCCGAG     | miRNA | miR-486-5p  |
| t0002295 | 22 | 140 TAGCAGTACATCATGGTTTACA     | miRNA | miR-15b     |
| t0002296 | 22 | 140 AGGCATTGACTTCTCACTAGCT     | miRNA | miR-1256    |
| t0002303 | 22 | 140 TACAGTACTGTGATAACTGATA     | miRNA | miR-101c    |
| t0002300 | 21 | 140 TGAGGTAGTAAGTTGTGTGGT      | miRNA | let-7b      |
| t0002312 | 25 | 139 TCTTTGGTTATCTAGCTGTATGATC  | miRNA | miR-9a      |
| t0002325 | 21 | 139 AATGACACGATCACTCCCGTT      | miRNA | miR-425     |
| t0002323 | 23 | 139 AGCTACATCTGGCTACTGGGTCT    | miRNA | miR-222     |
| t0002313 | 22 | 139 TAGGAGCACGTAAATATTGGCG     | miRNA | miR-16      |
| t0002320 | 23 | 139 TACCACAGGGTAGAACTACGGAT    | miRNA | miR-140     |
| t0002314 | 24 | 139 TACCACAGGGTAGAACACCGACA    | miRNA | miR-140     |
| t0002315 | 23 | 139 TACCACAGGGTAGAACACCGAA     | miRNA | miR-140     |
| t0002338 | 18 | 139 TGAGGTAGTAGTTTGTGC         | miRNA | let-7i      |
| t0002327 | 22 | 139 TGAGGGAGTAGTTTGTGCTGTT     | miRNA | let-7i      |
| t0002331 | 21 | 139 TGTGGTAGTAGATTGTATAGT      | miRNA | let-7f      |
| t0002333 | 22 | 138 CATTTCACTTGTCTCGGTCTGA     | miRNA | miR-25      |
| t0002341 | 21 | 138 TGAGGTAGTAGGTTGTTTAGT      | miRNA | let-7       |
| t0002330 | 21 | 137 TTTGGCACTAGCACATTTTTG      | miRNA | miR-96      |
| t0002360 | 23 | 137 TCCTGTACTGAGCTGCCTCGAGA    | miRNA | miR-486-5p  |
| t0002343 | 24 | 137 GAAAAGCTGGGTTGAGAGGGCGAT   | miRNA | miR-320a    |
| t0002351 | 24 | 137 AACATCAACGCTGTCGGTGAGTT    | miRNA | miR-181a    |
| t0002366 | 23 | 137 TACCACAGGGTAGAAACACGGAA    | miRNA | miR-140     |
| t0002348 | 21 | 136 AAACCGTTACCATTACTGAGG      | miRNA | miR-451     |
| t0002362 | 20 | 136 CAAAACGTGAGGCGCTGCTA       | miRNA | miR-424*    |
| t0002369 | 23 | 136 TGGGGGGCAGAGAGCGAGACTTT    | miRNA | miR-423-5p  |
| t0002355 | 21 | 136 CCAAAGAATTCTCCTTTTGGG      | miRNA | miR-186     |
| t0002357 | 21 | 136 TGGAGAGAAAGGCAGTTCCGA      | miRNA | miR-185     |
| t0002364 | 22 | 136 ACCACAGGGTAGAACACGGCA      | miRNA | miR-140     |
| t0002372 | 21 | 135 GGGAGCCAGGAAGTATTGATG      | miRNA | miR-505*    |
| t0002371 | 22 | 135 TCTCACACAGAAATCGCATCCG     | miRNA | miR-342-3p  |
| t0002381 | 20 | 135 CACCTTGCCTACTCAGGTC        | miRNA | miR-3200-3p |
| t0002389 | 19 | 135 TGACCTATGAATTGACAGC        | miRNA | miR-192     |
| t0002387 | 20 | 135 TATCAGCACATCATGGTTTA       | miRNA | miR-15b     |
| t0002383 | 21 | 135 AGCAGCATTGTACAGTGCTAT      | miRNA | miR-103a    |
| t0002377 | 21 | 135 TGAGGTAGTAGATTGTATAAT      | miRNA | let-7f      |
| t0002403 | 20 | 135 TGAGGTAGTAGCTTGTATAG       | miRNA | let-7f      |
| t0002392 | 22 | 134 GGCTGGTCCGAGTGCAGTGGTG     | miRNA | miR-3135b   |
| t0002404 | 22 | 134 AGACCTACTTATCTACCAACAG     | miRNA | miR-1839-3p |
| t0002399 | 21 | 134 TGGAATGTAAAGAAGTATGGA      | miRNA | miR-1-3p    |
| t0002400 | 21 | 134 TGAGGTAGTAGTTTGTGCTTA      | miRNA | let-7i      |
| t0002405 | 21 | 134 GAGGTAGTAGGTTGCATAGTT      | miRNA | let-7d      |
| t0002413 | 18 | 133 TGAGGTAGATTGTATAGT         | miRNA | miR-1961    |
| t0002425 | 24 | 133 AACATTCATTGTTGTCGGTGGATC   | miRNA | miR-181d-5p |
| t0002424 | 27 | 133 TGAGAACTGAATCCATAGGCTGTATC | miRNA | miR-146b    |
| t0002417 | 24 | 133 CTTTTTGCGGTCTGGGCTTGCATC   | miRNA | miR-129     |
| t0002415 | 21 | 133 TGAAGTAGTAGATTGTATAGT      | miRNA | let-7f      |
| t0002416 | 20 | 133 GAGGTAGTAGGTTGTGTGGT       | miRNA | let-7b      |

|          |    |                                 |       |              |
|----------|----|---------------------------------|-------|--------------|
| t0002412 | 21 | 133 TGAGGTAGTAGGTTGTCTGGT       | miRNA | let-7b       |
| t0002420 | 22 | 133 TGAGCTAGTAGGTTGTGTGGTT      | miRNA | let-7b       |
| t0002435 | 20 | 133 TGAGGTAGTAGGTTGTATAA        | miRNA | let-7        |
| t0002440 | 22 | 132 TATTGCACTCGTCCCGCCTCA       | miRNA | miR-92       |
| t0002437 | 22 | 132 CATTGCACTTGTCTCGGTTTGA      | miRNA | miR-25       |
| t0002441 | 21 | 132 ACCACAGGGCAGAACCACGGA       | miRNA | miR-140      |
| t0002434 | 20 | 132 TGAGGTATTAGATTGTATAG        | miRNA | let-7f       |
| t0002458 | 24 | 131 TCTGGGCACAGGCGGATGGACAGT    | miRNA | miR-5107     |
| t0002453 | 25 | 131 CTTTGAAGACTGAAGTGGAGAAGGG   | miRNA | miR-3526     |
| t0002456 | 21 | 131 TGGGTTCTGGCATGCTGATT        | miRNA | miR-23b*     |
| t0002448 | 27 | 131 GACTGGGGCGGTACATCTGTTAAATAT | miRNA | miR-219-2-3p |
| t0002446 | 24 | 131 TACCACAGGGTAGAACCAAGGACA    | miRNA | miR-140      |
| t0002451 | 21 | 131 TGAGGTAGTAGATTGTAGAGT       | miRNA | let-7f       |
| t0002457 | 22 | 131 AGAGGGAGTAGGTTGCATAGTT      | miRNA | let-7d       |
| t0002460 | 22 | 131 TGAGGTAGTAGGTTGTGTTGTT      | miRNA | let-7b       |
| t0002459 | 22 | 130 TGTAGAGCAGGGAGCAGGAAGT      | miRNA | miR-4732-5p  |
| t0002465 | 23 | 130 CATTGCACTTGTCTCGGTCTGTA     | miRNA | miR-25       |
| t0002466 | 20 | 130 ATTGCACTTGTCTCGGTCTG        | miRNA | miR-25       |
| t0002469 | 22 | 130 TGGCGAGAAAGGCAGTTCCTGA      | miRNA | miR-185      |
| t0002468 | 23 | 130 AGAAGCATTGTACAGGGCTATGA     | miRNA | miR-103a     |
| t0002476 | 22 | 129 TACGTCATCGTTGTTATCGTCA      | miRNA | miR-598      |
| t0002485 | 22 | 129 TCCTGTACTGAGCTGCCAGAG       | miRNA | miR-486-5p   |
| t0002480 | 23 | 129 AAACCGTTACCATTATCGAGTTT     | miRNA | miR-451      |
| t0002482 | 24 | 129 CTGAGGGGCAGAGAGCGAGACTTT    | miRNA | miR-423-5p   |
| t0002483 | 23 | 129 TGAGGGGCAGAGAGCGAGACTTC     | miRNA | miR-423-5p   |
| t0002477 | 23 | 129 CTAGACTGAAGTCTCCTTGAGGAA    | miRNA | miR-151-3p   |
| t0002473 | 22 | 129 ACCACAGGGTAGAACCAACGGAC     | miRNA | miR-140      |
| t0002479 | 22 | 129 TGAGGTAGTAGGCTGTATAGTT      | miRNA | let-7        |
| t0002497 | 20 | 129 TGAGGTAGTAGGGTGTATAG        | miRNA | let-7        |
| t0002495 | 21 | 128 CCTCCACACCCAAGGCTTGC        | miRNA | miR-532-3p   |
| t0002498 | 24 | 128 AAAACCGTTACCATTACTGAGTTA    | miRNA | miR-451      |
| t0002488 | 25 | 128 TGTAACATCCCCGACTGGAAGATC    | miRNA | miR-30d      |
| t0002492 | 22 | 128 TAGCAGCACGTTAATATTGGCG      | miRNA | miR-16       |
| t0002507 | 20 | 128 CTATACAACCTACTGCCTTC        | miRNA | let-7b*      |
| t0002515 | 21 | 128 TGAGGTAGGAGGTTGTATAGT       | miRNA | let-7        |
| t0002522 | 22 | 127 AAACCGTTACCATTATCGAGTT      | miRNA | miR-451      |
| t0002508 | 22 | 127 AAACCTTACCATTACTGAGTTT      | miRNA | miR-451      |
| t0002518 | 22 | 127 TGAGGGGCAGAGAGCGGGACTT      | miRNA | miR-423-5p   |
| t0002510 | 22 | 127 AAGCGGCGATGGCGGAGCTGAA      | miRNA | miR-1636     |
| t0002519 | 21 | 127 ACCACAGGCTAGAACCACGGA       | miRNA | miR-140      |
| t0002513 | 23 | 127 AGCAGCATTGTACAGGGTTATGA     | miRNA | miR-103a     |
| t0002517 | 21 | 127 CTATACAACCTACTGCCTTCT       | miRNA | let-7b*      |
| t0002536 | 20 | 126 TATTGCACTTGTCCCGGCCA        | miRNA | miR-92a      |
| t0002532 | 25 | 126 TGAGGGGCAGAGAGCGAGACTTTTT   | miRNA | miR-423-5p   |
| t0002526 | 22 | 126 CATTGCACTTGTTCGGTCTGA       | miRNA | miR-25       |
| t0002523 | 20 | 126 TAGCAGCACATAATGGTTTA        | miRNA | miR-15b      |
| t0002528 | 22 | 126 TACCACAGGGTAGAACACAGA       | miRNA | miR-140      |
| t0002527 | 21 | 126 GAGGTAGTAGTTTGTACAGTT       | miRNA | let-7g       |
| t0002541 | 19 | 126 TGTAGTAGGTTGTGTGGTT         | miRNA | let-7b       |
| t0002543 | 21 | 126 TGAGGTAGTGGGTTGTATAGT       | miRNA | let-7        |
| t0002545 | 22 | 125 TATTGCACTCGTCCCGCCTCT       | miRNA | miR-92       |
| t0002552 | 20 | 125 TGAGGGGCAGAGAGCGAGAT        | miRNA | miR-423-5p   |
| t0002550 | 23 | 125 TGAGGGGCAGAGTCCGAGACTTT     | miRNA | miR-423-5p   |
| t0002551 | 22 | 125 ACATTCATTGCTGTCTGGTGGT      | miRNA | miR-181b     |
| t0002549 | 21 | 125 TAGCAGCACGTAATATTGCC        | miRNA | miR-16       |
| t0002570 | 23 | 125 TACCACAGTGTAGAACCACGGAA     | miRNA | miR-140      |
| t0002558 | 22 | 125 TGAGGTAGTAGATAGTATAGTT      | miRNA | let-7f       |
| t0002566 | 22 | 125 TGAGGTAGTAGGTTATGTGGTT      | miRNA | let-7b       |

|          |    |                               |       |             |
|----------|----|-------------------------------|-------|-------------|
| t0002567 | 21 | 125 TGACGTAGTAGGTTGTGTGGT     | miRNA | let-7b      |
| t0002561 | 21 | 125 TGAGGTAGTAGGTTGCATAGT     | miRNA | let-7       |
| t0002563 | 22 | 124 TTCTCTGTTTTGGCCATGTGTG    | miRNA | miR-942     |
| t0002572 | 21 | 124 GAGGGGCAGAGAGCGAGACTT     | miRNA | miR-423-5p  |
| t0002559 | 24 | 124 ACTGGACTTGGAGTCAGAAGGCAA  | miRNA | miR-378     |
| t0002594 | 23 | 124 AAAAGCTGGGTTGAGAGGGCAAAG  | miRNA | miR-320b    |
| t0002574 | 23 | 124 ATCACATTGCCAGGGATTTCCAA   | miRNA | miR-23a     |
| t0002588 | 23 | 124 TACCACAGGGGAGAACCACGGAC   | miRNA | miR-140     |
| t0002582 | 22 | 124 TGAGGTAGTTGGTTGTGTGGTT    | miRNA | let-7b      |
| t0002590 | 23 | 123 AAAACCGTTACCATTACTGAGTT   | miRNA | miR-451     |
| t0002587 | 21 | 123 AGAAGCATTGTACAGGGCTAT     | miRNA | miR-4289    |
| t0002583 | 22 | 123 TTCAAGTAATTCAGGATAGGCT    | miRNA | miR-26a     |
| t0002592 | 24 | 123 TGGAGAGAAAGGCAGTTCCTGAGT  | miRNA | miR-185     |
| t0002593 | 18 | 123 CTACAGTATAGATGATGT        | miRNA | miR-144     |
| t0002591 | 22 | 123 TACCACAAGGTAGAACCACGGA    | miRNA | miR-140     |
| t0002600 | 22 | 123 TACCACAGGGTAGAACCCTCGGA   | miRNA | miR-140     |
| t0002609 | 22 | 123 TGAGGTAGTAGGATGTGTGGTT    | miRNA | let-7b      |
| t0002602 | 21 | 123 TAAGGTAGTAGGTTGTATAGT     | miRNA | let-7       |
| t0002610 | 24 | 122 AAAAGCTGGGTTGAGAGGGCGAGT  | miRNA | miR-320a    |
| t0002597 | 22 | 122 TACCACAGGGCAGAACCACGGA    | miRNA | miR-140     |
| t0002611 | 25 | 122 ACCACAGGGTAGAACCACGGACAGA | miRNA | miR-140     |
| t0002607 | 19 | 122 GTGAGGACTCGGGAGGTGG       | miRNA | miR-1224    |
| t0002634 | 21 | 122 AAGCAGCATTGTACAGGGCTA     | miRNA | miR-103a    |
| t0002623 | 21 | 122 TGAGGTAGTTGATTGTATAGT     | miRNA | let-7f      |
| t0002636 | 23 | 121 TATTGCACTTGTCCCGCCTGAA    | miRNA | miR-92b-3p  |
| t0002620 | 22 | 121 TCACACAGAAATCGCACCCGTC    | miRNA | miR-342-3p  |
| t0002628 | 24 | 121 GAAAAGCTGGGTTGAGAGGGCGTT  | miRNA | miR-320d    |
| t0002612 | 25 | 121 AAAAGCTGGGTTGAGAGGGCGAAGT | miRNA | miR-320a    |
| t0002629 | 21 | 121 CATTGCATTTGTCTCGGTCTG     | miRNA | miR-25      |
| t0002626 | 22 | 121 TAGCAGCACGTAATACTGGCG     | miRNA | miR-16      |
| t0002613 | 22 | 121 TAGCACCACGTAATATTGGCG     | miRNA | miR-16      |
| t0002648 | 23 | 121 TCTCCAACCCTTGTACCAGTGT    | miRNA | miR-150     |
| t0002641 | 22 | 121 TGAGGTAGTAGTTTGTAAAGTT    | miRNA | let-7g      |
| t0002642 | 20 | 121 TGAGGTAGTAGACTGTATAG      | miRNA | let-7f      |
| t0002646 | 22 | 121 CTGAGGTAGTAGGTTGTATAGT    | miRNA | let-7       |
| t0002650 | 22 | 120 TATTGCACTTGTCCCGCCTTGT    | miRNA | miR-92a     |
| t0002651 | 21 | 120 TAGAGGAGATGGCGCAGGGGA     | miRNA | miR-877     |
| t0002668 | 23 | 120 TAAGGGGCAGAGAGCGAGACTTT   | miRNA | miR-423-5p  |
| t0002664 | 22 | 120 TGAGGGGCAGAGGGCGAGACTT    | miRNA | miR-423-5p  |
| t0002665 | 21 | 120 TGAGGGGCAGAGAGCGAGTCT     | miRNA | miR-423-5p  |
| t0002657 | 22 | 120 TGAGGGGCAGAGAGCCAGACTT    | miRNA | miR-423-5p  |
| t0002662 | 25 | 120 ACTGGACTTGGAGTCAGAAGGAATC | miRNA | miR-378c    |
| t0002654 | 23 | 120 TGGAGAGAAAGGTAGTTCCTGAA   | miRNA | miR-185     |
| t0002658 | 22 | 120 TAGCAGCACGTACATATTGGCG    | miRNA | miR-16      |
| t0002670 | 24 | 120 ATAGCAGCACGTAATATTGGCGA   | miRNA | miR-16      |
| t0002656 | 22 | 120 ACCACAGGGTAGAACCACGGTA    | miRNA | miR-140     |
| t0002672 | 22 | 120 TACAACAGGGTAGAACCACGGA    | miRNA | miR-140     |
| t0002675 | 21 | 120 TTAGGTAGTAGTGTGTGGT       | miRNA | let-7b      |
| t0002677 | 21 | 120 TGAGGTAGTATGTTGTGTGGT     | miRNA | let-7b      |
| t0002691 | 21 | 120 TGAGCTAGTAGTGTGTGGT       | miRNA | let-7b      |
| t0002682 | 21 | 120 TGAGGTAGTAGGTTGTATATT     | miRNA | let-7       |
| t0002685 | 22 | 119 CGGGGCAGCTCAGTACAGGATA    | miRNA | miR-486-3p  |
| t0002695 | 25 | 119 TGTAGAGCAGGGAGCAGGAAGCTGA | miRNA | miR-4732-5p |
| t0002700 | 21 | 119 AAAAGCTGGGTTGAGAGGCGA     | miRNA | miR-320d    |
| t0002693 | 21 | 119 ACAGTAGTCTGCACATTGGTT     | miRNA | miR-199     |
| t0002690 | 22 | 119 TGGAGAGAAAGGCAGTTCCTCA    | miRNA | miR-185     |
| t0002689 | 19 | 119 TAGCAGTACATCATGGTTT       | miRNA | miR-15b     |
| t0002699 | 22 | 119 TCAGTGCCTACAGAACTTTGT     | miRNA | miR-148a    |



|          |    |                                 |       |              |
|----------|----|---------------------------------|-------|--------------|
| t0002680 | 20 | 119 AGAGGTAGTAGGTTGCATTT        | miRNA | let-7d       |
| t0002694 | 21 | 118 TGAGGGACAGAGAGCGAGACT       | miRNA | miR-423-5p   |
| t0002678 | 22 | 118 AAAAGCTGGGGTGAGAGGGCGA      | miRNA | miR-320a     |
| t0002686 | 22 | 118 TAGCAGCACGTCAATATTGGCG      | miRNA | miR-16       |
| t0002688 | 25 | 118 TGAGAACTGAATCCATGGGTTATC    | miRNA | miR-146a     |
| t0002684 | 24 | 118 TACCACAGGGTAGAACCACGGAGA    | miRNA | miR-140      |
| t0002713 | 22 | 118 TGAGGTAGTAGTTTGCACAGTT      | miRNA | let-7g       |
| t0002720 | 21 | 118 TGGGTAGTAGATTGTATAGTT       | miRNA | let-7f       |
| t0002723 | 21 | 118 TAGAGGTAGTAGGTTGCATAG       | miRNA | let-7d       |
| t0002706 | 21 | 118 TGAGGTAGTAGGTTGTGTGGG       | miRNA | let-7b       |
| t0002712 | 22 | 117 AAATCGTTACCATTACTGAGTT      | miRNA | miR-451      |
| t0002717 | 23 | 117 TGAGGGGCAGAGAGGGAGACTTT     | miRNA | miR-423-5p   |
| t0002719 | 22 | 117 TGATGGGCAGAGAGCGAGACTT      | miRNA | miR-423-5p   |
| t0002707 | 22 | 117 TAGCACCATCTGAAATCGGTAA      | miRNA | miR-29d      |
| t0002725 | 23 | 117 ATAAAGTGCTTATAGTGCAGGTA     | miRNA | miR-20       |
| t0002740 | 20 | 117 CAAAGAATTCTCCTTTTGGG        | miRNA | miR-186      |
| t0002724 | 22 | 117 TGGAGAGAATGGCAGTTCCTGA      | miRNA | miR-185      |
| t0002726 | 21 | 117 TCAAAGTGCTTACAGTGCAGG       | miRNA | miR-17       |
| t0002730 | 19 | 117 TAGCAGCCCATCATGGTTT         | miRNA | miR-15b      |
| t0002729 | 22 | 117 CCCATAAAGTAGAAAGCACTAT      | miRNA | miR-142      |
| t0002735 | 25 | 117 TACCACAGGGTAGAACCACGGAAGA   | miRNA | miR-140      |
| t0002742 | 21 | 117 ACAACAGGGTAGAACCACGGA       | miRNA | miR-140      |
| t0002741 | 21 | 117 TGAGGTAGTAGGTTTTGTGGT       | miRNA | let-7b       |
| t0002758 | 23 | 116 TAGAGGAGATGGCGCAGGGGACT     | miRNA | miR-877      |
| t0002751 | 23 | 116 TCTGGGCACAGGCGGATGGACAG     | miRNA | miR-5107     |
| t0002757 | 21 | 116 TGAGGGGCGGAGAGCGAGACT       | miRNA | miR-423-5p   |
| t0002770 | 21 | 116 CTGGACTTGGAGTCAGAAGGC       | miRNA | miR-378      |
| t0002766 | 25 | 116 TTTGTTTCGTTCCGGCTCGCGTGAATC | miRNA | miR-375      |
| t0002748 | 22 | 116 AAAAGCTGGGTTGAGAGGCGAA      | miRNA | miR-320d     |
| t0002769 | 22 | 116 AAAAGCTGGGTTGAGTGGGCGA      | miRNA | miR-320a     |
| t0002750 | 20 | 116 TGGAGAGAAAGGCAGTTTCT        | miRNA | miR-185      |
| t0002760 | 22 | 116 TGGAGAGAACGGCAGTTCCTGA      | miRNA | miR-185      |
| t0002747 | 22 | 116 TCGAGGAGCTCACAGTCTAGTA      | miRNA | miR-151-5p   |
| t0002746 | 20 | 116 TAGTACTGTGCATATCATCT        | miRNA | miR-1278     |
| t0002754 | 25 | 116 TGAGGTAGTAGATTGTATAGTTGTG   | miRNA | let-7f       |
| t0002744 | 21 | 116 TGACGTAGTAGATTGTATAGT       | miRNA | let-7f       |
| t0002785 | 18 | 116 TGTAGTAGGTTGTGTGGT          | miRNA | let-7b       |
| t0002792 | 21 | 115 TGAGGGGCAGAGAGCAAGACT       | miRNA | miR-423-5p   |
| t0002789 | 21 | 115 TAAGGGGCAGAGAGCGAGACT       | miRNA | miR-423-5p   |
| t0002774 | 22 | 115 CATTGCACTTGTCTCGGCCTGA      | miRNA | miR-25       |
| t0002773 | 24 | 115 TGACTGGGGCGGTACATCTGTTAA    | miRNA | miR-219-2-3p |
| t0002777 | 22 | 115 TAGGTAGTTTCTGTTGTTGGA       | miRNA | miR-196b     |
| t0002791 | 22 | 115 ACTCGGCGTGGCGTCCGTCGTT      | miRNA | miR-1307     |
| t0002780 | 21 | 115 TGAGGTAGTTGGTTGTGTGGT       | miRNA | let-7b       |
| t0002793 | 22 | 115 TGAGGTAGTAGGTCGTATAGTT      | miRNA | let-7        |
| t0002772 | 21 | 115 TGAGGTAGCAGGTTGTATAGT       | miRNA | let-7        |
| t0002778 | 21 | 114 AAACCGTTACCATTAATGAGT       | miRNA | miR-451      |
| t0002771 | 28 | 114 AACTTTGAAGCCGAAGTGGAGAAGGGT | miRNA | miR-3526     |
| t0002775 | 19 | 114 TACAGTATAGATGATGTAT         | miRNA | miR-144      |
| t0002787 | 22 | 114 TACCACAGGGTATAACCACGGA      | miRNA | miR-140      |
| t0002801 | 20 | 114 TGAGGTAGTAGATTGTTTAG        | miRNA | let-7f       |
| t0002820 | 21 | 114 AGAGGTAGTAGGTTGTATAGT       | miRNA | let-7d       |
| t0002817 | 22 | 114 TGAGGTAGTAGGTTGTATACTT      | miRNA | let-7        |
| t0002812 | 21 | 114 TGAGGTAGTAGGATGTATAGT       | miRNA | let-7        |
| t0002803 | 22 | 113 TATTGCACTTGTCTGGCCTGT       | miRNA | miR-92a      |
| t0002813 | 23 | 113 TAGTGCAATATTGCTTATAGGGT     | miRNA | miR-454      |
| t0002818 | 23 | 113 AAACCGTTACCATTACTCAGTTT     | miRNA | miR-451      |
| t0002811 | 23 | 113 TGAGGGGCAGAGAGCGAGAGTTT     | miRNA | miR-423-5p   |

|          |    |                                   |       |             |
|----------|----|-----------------------------------|-------|-------------|
| t0002821 | 23 | 113 TGAGGGGCAGAGAGCGAGACCTT       | miRNA | miR-423-5p  |
| t0002833 | 21 | 113 CGCATCCCCTAGGGCATTGGT         | miRNA | miR-324-5p  |
| t0002835 | 24 | 113 AAAAGCTGGGTTGAGAGGGCGTAT      | miRNA | miR-320d    |
| t0002836 | 22 | 113 CATTGCACTTGTCTCGGTCTTA        | miRNA | miR-25      |
| t0002832 | 24 | 113 CTAGACTGAAGCTCCTTGAGGAAG      | miRNA | miR-151-3p  |
| t0002830 | 22 | 113 TACCACGGGTAGAACCCACGGA        | miRNA | miR-140     |
| t0002827 | 21 | 113 TGAGGGAGTAGTTTGTACAGT         | miRNA | let-7g      |
| t0002828 | 22 | 113 TGAGGTAGTAGTTTGTACATTT        | miRNA | let-7g      |
| t0002837 | 21 | 113 TGAGGTACTAGGTTGTATAGT         | miRNA | let-7       |
| t0002850 | 22 | 112 TCCTGTACTGAGCTGCCCCGAC        | miRNA | miR-486-5p  |
| t0002846 | 23 | 112 AAATTGTTACCATTACTGAGTTT       | miRNA | miR-451     |
| t0002856 | 22 | 112 TAGGGGCAGAGAGCGAGACTTT        | miRNA | miR-423-5p  |
| t0002844 | 23 | 112 TGAGGGGCAGAGAGCGTGACTTT       | miRNA | miR-423-5p  |
| t0002855 | 23 | 112 TCTCACACAGAAATCGCACCCGA       | miRNA | miR-342-3p  |
| t0002864 | 25 | 112 TTCAAGTAATCCAGGATAGGCTATC     | miRNA | miR-26a     |
| t0002842 | 23 | 112 TGGAGAGAAAGGCAGTTACTGAA       | miRNA | miR-185     |
| t0002841 | 19 | 112 TAGCAGCAGATCATGGTTT           | miRNA | miR-15b     |
| t0002862 | 23 | 112 TACCACAGGGTAGAACCATGGAC       | miRNA | miR-140     |
| t0002843 | 25 | 112 TGGAATGTAAAGAAGTATGGAGATC     | miRNA | miR-1-3p    |
| t0002840 | 23 | 112 AGCAGCATTGTACAGGGCTATGG       | miRNA | miR-103a    |
| t0002851 | 21 | 112 ACAGTACTGTGATAACTGAAG         | miRNA | miR-101c    |
| t0002849 | 23 | 111 TCCTGTACTGAGCTGCCCCGACA       | miRNA | miR-486-5p  |
| t0002866 | 22 | 111 AAGCAGCACGTAATATTGGCG         | miRNA | miR-457b    |
| t0002891 | 20 | 111 TGAGGGAGTAGGTTGTGTGG          | miRNA | miR-4510    |
| t0002869 | 22 | 111 CACCTTGCCTACTCAGGTCTG         | miRNA | miR-3200-3p |
| t0002878 | 22 | 111 TGTGGACAGTGAGGTAGAGGGA        | miRNA | miR-3138    |
| t0002874 | 23 | 111 TAGCTTATCAGACTGATGTTGAC       | miRNA | miR-21      |
| t0002890 | 20 | 111 TGACCTATGAATTGACAGCA          | miRNA | miR-192     |
| t0002894 | 21 | 111 TGGAGAAAAAGGCAGTTCCTG         | miRNA | miR-185     |
| t0002886 | 22 | 111 TACCACAGGATAGAACCCACGGA       | miRNA | miR-140     |
| t0002868 | 18 | 111 TGAGGTAGTAGGTGTGGT            | miRNA | let-7a      |
| t0002867 | 22 | 110 TATTGCACTTGTCTTGGCCTGT        | miRNA | miR-92a     |
| t0002881 | 23 | 110 TGAAAGACGATGGTAGTGAGATG       | miRNA | miR-71      |
| t0002892 | 23 | 110 CATGCCTTGAGTGTAGGACCGTA       | miRNA | miR-532-5p  |
| t0002913 | 21 | 110 TCCTGTACTGAGCTGACCCGA         | miRNA | miR-486-5p  |
| t0002919 | 28 | 110 AGGGCTGGGTTCGGTCGGGCTGGGGCGCC | miRNA | miR-4651    |
| t0002901 | 22 | 110 AAACCGTTACCATCACTGAGTT        | miRNA | miR-451     |
| t0002910 | 25 | 110 AAACCTTTACCATTACTGAGTTTAG     | miRNA | miR-451     |
| t0002914 | 21 | 110 TGGAGAGAAAGGCAGTAGTTG         | miRNA | miR-4306    |
| t0002905 | 24 | 110 TGTA AACATCCTACACTCTCAGCA     | miRNA | miR-30c     |
| t0002897 | 20 | 110 TAAGGTGCATCTAGTGCAGA          | miRNA | miR-18a     |
| t0002915 | 20 | 110 TGGAGAGAAAGGCAGTTCCTG         | miRNA | miR-185     |
| t0002912 | 23 | 110 TACCATAGGGTAGAACCCACGGAA      | miRNA | miR-140     |
| t0002916 | 24 | 110 ACCACAGGGTAGAACCCACGGATAA     | miRNA | miR-140     |
| t0002949 | 20 | 110 TTTAGAGACGGGGTCTTGCT          | miRNA | miR-1303    |
| t0002942 | 19 | 110 TCACAGTGAACCGGTCTCT           | miRNA | miR-128     |
| t0002923 | 21 | 110 GTGGGCGGGGGCAGGTGTGTG         | miRNA | miR-1228*   |
| t0002938 | 23 | 110 AAGCAGCATTGTACAGGGCTATG       | miRNA | miR-103a    |
| t0002940 | 20 | 110 TGAGGTAGTAGATTGTATGG          | miRNA | let-7f      |
| t0002920 | 22 | 110 TTAGGTAGTAGGTTGTGTGGTT        | miRNA | let-7b      |
| t0002943 | 22 | 110 TTAGGTAGTAGGTTGTGTGGTA        | miRNA | let-7b      |
| t0002927 | 24 | 109 AAACCGTTACCATTACTGAGTTTT      | miRNA | miR-451     |
| t0002952 | 30 | 109 AACTTTGAAGACTGAAGTGGAGAAGGGT  | miRNA | miR-3526    |
| t0002932 | 22 | 109 TGGAGAGAAAGGCAGTTGCTGA        | miRNA | miR-185     |
| t0002926 | 22 | 109 ACCACAGGGTAGAACCCACGGCT       | miRNA | miR-140     |
| t0002935 | 23 | 109 TACCACAGTGTAGAACCCACGGAC      | miRNA | miR-140     |
| t0002945 | 23 | 109 TACCACAGGGTAGAACCCACGGTA      | miRNA | miR-140     |
| t0002933 | 23 | 109 AGCAGCATTGTACAGGGCTATAT       | miRNA | miR-107     |

|          |    |                                |       |             |
|----------|----|--------------------------------|-------|-------------|
| t0002936 | 22 | 109 GAGGTAGTAGATTGTATAGTTA     | miRNA | let-7f      |
| t0002941 | 22 | 109 TGAGGTAGTAGGTTGTATAGGT     | miRNA | let-7       |
| t0002946 | 21 | 108 TCCTGTACTIONGAGCTGCCCA     | miRNA | miR-486-5p  |
| t0002922 | 21 | 108 TCAGGCTCAGTCCCCTCCCGA      | miRNA | miR-484     |
| t0002944 | 21 | 108 TGAGAGGCAGAGAGCGAGACT      | miRNA | miR-423-5p  |
| t0002947 | 21 | 108 TGAGCGGCAGAGAGCGAGACT      | miRNA | miR-423-5p  |
| t0002968 | 22 | 108 TGAGGTAGTAGGTCGTGTGGTT     | miRNA | let-7b      |
| t0002963 | 22 | 107 TGAGGGGCAGAGAGCGAGGCTT     | miRNA | miR-423-5p  |
| t0002957 | 23 | 107 AAAAGTTGGGTTGAGAGGGCGTT    | miRNA | miR-320d    |
| t0002954 | 26 | 107 TGAATGTAAGGAAGTGTGTGGAATC  | miRNA | miR-206     |
| t0002966 | 23 | 107 CAACGGAATCCCAAAAGCAGCTT    | miRNA | miR-191     |
| t0002969 | 20 | 107 TAGCATCACGTAATATTGG        | miRNA | miR-16      |
| t0002962 | 22 | 107 TAGCCGCACGTAATATTGGCG      | miRNA | miR-16      |
| t0002977 | 20 | 107 TACAGTATAGATGATGTATT       | miRNA | miR-144     |
| t0002960 | 24 | 107 TACCACAGTGTAGAACCACGGACA   | miRNA | miR-140     |
| t0002985 | 22 | 107 ACCACAGGGTAGAATCACGGAA     | miRNA | miR-140     |
| t0002993 | 21 | 107 TAAGGTAGTAGGTTGTGTGGT      | miRNA | let-7b      |
| t0002983 | 23 | 107 TGAGGTAGTATGTTGTGTGGTTA    | miRNA | let-7b      |
| t0002999 | 19 | 107 TGAGGTAGTAGGTTGTAGT        | miRNA | let-7       |
| t0002997 | 21 | 107 TGAGGTAGTAGGTTCTATAGT      | miRNA | let-7       |
| t0003014 | 24 | 106 TGAAGACTAGTGATTTTGTGT      | miRNA | miR-7       |
| t0003017 | 20 | 106 TCTTGTACTGAGCTGCCCCG       | miRNA | miR-486-5p  |
| t0003010 | 22 | 106 TCCCACTGCTTCACTTGACTAG     | miRNA | miR-4301    |
| t0003008 | 22 | 106 CATTGCACTCGTCTCGGTTTGA     | miRNA | miR-25      |
| t0003007 | 21 | 106 TGGAGAGAAAGGCAGTCCCTG      | miRNA | miR-185     |
| t0003025 | 22 | 106 TGGAGAGAAAGGCAGTACCTGA     | miRNA | miR-185     |
| t0003026 | 24 | 106 TAGCAGCACGTAATATTGGCGAT    | miRNA | miR-16      |
| t0003009 | 22 | 106 TAGCAGAACATCATGGTTTACA     | miRNA | miR-15b     |
| t0003015 | 21 | 106 ACCACATGGTAGAACCACGGA      | miRNA | miR-140     |
| t0003005 | 22 | 106 ACCATAGGGTAGAACCACGGAC     | miRNA | miR-140     |
| t0003018 | 20 | 106 ACCACAGGGTAGAACTACGG       | miRNA | miR-140     |
| t0003004 | 21 | 106 TGAGGTAGTAGGTTGGGTGGT      | miRNA | let-7b      |
| t0003012 | 22 | 105 ACTGGCTAGGGAAAATGATTGG     | miRNA | miR-664*    |
| t0003044 | 22 | 105 GAGCTTATTCATAAAAGTGCAG     | miRNA | miR-590-5p  |
| t0003045 | 21 | 105 TCACACAGAAATCGCACCCGT      | miRNA | miR-342-3p  |
| t0003042 | 21 | 105 CGGGGAGAGAACGCAGTGACG      | miRNA | miR-3175    |
| t0003039 | 23 | 105 TGGAGAGAAAGGCAGTTCCTGAC    | miRNA | miR-185     |
| t0003038 | 20 | 105 TAGAGAAAGGCAGTTCCTGA       | miRNA | miR-185     |
| t0003043 | 20 | 105 TAGCAGCAGATCATGGTTTA       | miRNA | miR-15b     |
| t0003046 | 21 | 105 ATACAGTATAGATGATGTACTION   | miRNA | miR-144     |
| t0003047 | 25 | 105 AGCAGCATTGTACAGGGCTATGAGC  | miRNA | miR-103a    |
| t0003029 | 22 | 105 TGAGGTAGTAGAGTGTATAGTT     | miRNA | let-7f      |
| t0003037 | 21 | 105 TGAGGTAGTAGGTTATGTGGT      | miRNA | let-7b      |
| t0003053 | 20 | 104 CAAAGTGCTGTTCTGTGCAGG      | miRNA | miR-93      |
| t0003041 | 23 | 104 AGGGACGGGACGCGGTGCAGTGA    | miRNA | miR-92b*    |
| t0003075 | 23 | 104 TGTAGAGCAGGGAGCAGGAAGTT    | miRNA | miR-4732-5p |
| t0003073 | 20 | 104 AAACCATTACCATTACTGAG       | miRNA | miR-451     |
| t0003057 | 23 | 104 ATATAATACAACCTGCTAAGTGA    | miRNA | miR-374     |
| t0003078 | 26 | 104 AGGCAGTGTAGTTAGCTGATTGCATC | miRNA | miR-34c     |
| t0003058 | 18 | 104 AAGCTGCCAGTTGAAGAA         | miRNA | miR-22-3p   |
| t0003071 | 22 | 104 CAACGGAATCCCAAAAGAAGCT     | miRNA | miR-191     |
| t0003056 | 20 | 104 TGGAGAGAAAGGCAGTTCGG       | miRNA | miR-185     |
| t0003065 | 20 | 104 TGGAGAGAAAGGCAGTTCGA       | miRNA | miR-185     |
| t0003064 | 23 | 104 ATAGCAGCACATAATGGTTTGTG    | miRNA | miR-15a     |
| t0003077 | 22 | 104 TGAGGTAGTATTTTGTACAGTT     | miRNA | let-7g      |
| t0003068 | 21 | 104 TGAGGTTGTAGATTGTATAGT      | miRNA | let-7f      |
| t0003108 | 20 | 104 GGTAGTAGATTGTATAGTGA       | miRNA | let-7f      |
| t0003094 | 22 | 103 TCCTGTACTIONGAGCTGCCCCGAG  | miRNA | miR-486-5p  |

|          |    |     |                             |       |            |
|----------|----|-----|-----------------------------|-------|------------|
| t0003102 | 22 | 103 | ATTGCACGGTATCCATCTGTAA      | miRNA | miR-363    |
| t0003093 | 20 | 103 | TAGAAGCACATCATGGTTTA        | miRNA | miR-15b    |
| t0003098 | 20 | 103 | CTACAGTATAGATGATGTAC        | miRNA | miR-144    |
| t0003105 | 26 | 103 | ACCACAGGGTAGAACCACGGACAAGA  | miRNA | miR-140    |
| t0003099 | 22 | 103 | GTGAGGACTCGGGAGGTGGAGA      | miRNA | miR-1224   |
| t0003106 | 23 | 103 | ATCAGCATTGTACAGGGCTATGA     | miRNA | miR-103a   |
| t0003100 | 24 | 102 | AGGTGGAAGGTTGTAGGCATGTAT    | miRNA | miR-965-5p |
| t0003107 | 19 | 102 | TGTA CTGAGCTGCCCCGAA        | miRNA | miR-486-5p |
| t0003091 | 22 | 102 | AGGAGAGAAAGGCAGTTCCTGA      | miRNA | miR-185    |
| t0003085 | 22 | 102 | TAGCAGCACGTAAATATAGGCG      | miRNA | miR-16     |
| t0003087 | 20 | 102 | TAGCAGAACATAATGGTTTG        | miRNA | miR-15a    |
| t0003092 | 22 | 102 | CCCATAAAGTAGAAAGCACTAG      | miRNA | miR-142    |
| t0003129 | 23 | 102 | CAGTGCAATGTAAAAGGGCATT      | miRNA | miR-130a   |
| t0003118 | 21 | 102 | AGCAGCATTGTACAGGGTCAT       | miRNA | miR-103a   |
| t0003119 | 20 | 102 | TGAGGTACTAGATTGTATAG        | miRNA | let-7f     |
| t0003121 | 26 | 101 | GAAGACTGAAGTGGAGAAGGGTTTCT  | miRNA | miR-739    |
| t0003111 | 20 | 101 | GGAGAGAAAGGCAGTTCCTG        | miRNA | miR-185    |
| t0003124 | 20 | 101 | TAGCAGCACGTAAATATTGT        | miRNA | miR-16     |
| t0003120 | 23 | 101 | TGAGGTAGTAGATTGTATATGTT     | miRNA | let-7f-5p  |
| t0003144 | 21 | 101 | TGAGGTAGTACATTGTATAGT       | miRNA | let-7f     |
| t0003155 | 22 | 101 | TGATGTAGTAGTGTGTATAGTT      | miRNA | let-7      |
| t0003145 | 23 | 100 | AAATCGTTACCATTACTGAGTTT     | miRNA | miR-451    |
| t0003162 | 20 | 100 | AAACCGTTACCATTACCGAG        | miRNA | miR-451    |
| t0003142 | 23 | 100 | TGAGGGGCAGAGAACGAGACTTT     | miRNA | miR-423-5p |
| t0003135 | 21 | 100 | CATTGCACTTGTCTCGGGCTG       | miRNA | miR-25     |
| t0003158 | 22 | 100 | TAGCAGCACGTAAATGTTGGCG      | miRNA | miR-16     |
| t0003149 | 24 | 100 | TACCACATGGTAGAACCACGGACA    | miRNA | miR-140    |
| t0003156 | 24 | 100 | TACCAGAGGGTAGAACCACGGACA    | miRNA | miR-140    |
| t0003171 | 24 | 100 | TACCACAGGGTAGAACCACGGATC    | miRNA | miR-140    |
| t0003179 | 22 | 100 | CTGAGGTAGTAGTTTGTACAGT      | miRNA | let-7g     |
| t0003177 | 24 | 100 | TGAGGTAGTAGTTTGTACAGTTAA    | miRNA | let-7g     |
| t0003181 | 23 | 100 | TGAGGTAGTAGTTTGTACAGTAA     | miRNA | let-7g     |
| t0003172 | 20 | 100 | TAAGGTAGTAGATTGTATAG        | miRNA | let-7f     |
| t0003170 | 20 | 100 | TGAGTTAGTAGATTGTATAG        | miRNA | let-7f     |
| t0003190 | 22 | 100 | TGAGGTCGTAGGTTGTGTGGTT      | miRNA | let-7b     |
| t0003205 | 22 | 100 | TGAGGTAGAAGTTGTGTGGTT       | miRNA | let-7b     |
| t0003218 | 22 | 99  | CTGGCTAGGGAAAATGATTGGA      | miRNA | miR-664*   |
| t0003207 | 26 | 99  | TCCTGTA CTGAGCTGCCCCGAGATGG | miRNA | miR-486-5p |
| t0003197 | 20 | 99  | AAACCGTTAACATTACTGAG        | miRNA | miR-451    |
| t0003192 | 23 | 99  | AAACCGTTACCATTACTGAGGTT     | miRNA | miR-451    |
| t0003198 | 21 | 99  | AAAGCTGGGTTGAGAGGGCAT       | miRNA | miR-320d   |
| t0003210 | 22 | 99  | AAAAGTCGGGTTGAGAGGGCGT      | miRNA | miR-320c   |
| t0003195 | 23 | 99  | CTTTCAGTCGGATGTTTACAGCA     | miRNA | miR-30e*   |
| t0003204 | 22 | 99  | TAGCAGCACGTAAATATTGGTA      | miRNA | miR-16b    |
| t0003219 | 23 | 99  | TACCACAGGGTAGAACCAAGGAA     | miRNA | miR-140    |
| t0003193 | 22 | 99  | TGAAGTAGTAGTTTGTACAGTT      | miRNA | let-7g     |
| t0003214 | 18 | 99  | AGAGGTAGTAGGTTGCAT          | miRNA | let-7d     |
| t0003209 | 25 | 98  | TCCTGTA CTGAGCTGCCCCGACGGT  | miRNA | miR-486-5p |
| t0003211 | 21 | 98  | TCCTGTA CTGAGCTGCCCAA       | miRNA | miR-486-5p |
| t0003237 | 20 | 98  | AAATTGTTACCATTACTGAG        | miRNA | miR-451    |
| t0003231 | 22 | 98  | AAACCGTTACCATTAATGAGTT      | miRNA | miR-451    |
| t0003236 | 23 | 98  | ATGACACGATCACTCCCGTTGAG     | miRNA | miR-425-5p |
| t0003247 | 27 | 98  | ACTGGACTTGGAGTCAGAAGGCATATC | miRNA | miR-378    |
| t0003222 | 25 | 98  | TTGAAGACTGAAGTGGAGAAGGGT    | miRNA | miR-3526   |
| t0003225 | 23 | 98  | TTCAAGTAATCCAGGATAGGCTT     | miRNA | miR-26a    |
| t0003220 | 23 | 98  | CAACGGAATCTCAAAGCAGCTG      | miRNA | miR-191    |
| t0003221 | 23 | 98  | TGGAGAGAAAGGCAGTTTCTGAA     | miRNA | miR-185    |
| t0003242 | 23 | 98  | TACCACAGGGTAGAATCACGGAA     | miRNA | miR-140    |

|          |    |                               |       |             |
|----------|----|-------------------------------|-------|-------------|
| t0003241 | 22 | 97 TACGTCATTGTTGTCATCGTCA     | miRNA | miR-598     |
| t0003240 | 22 | 97 TCCTGTAAGTACTGAGATGCCCGAG  | miRNA | miR-486-5p  |
| t0003271 | 20 | 97 TCCTGTAAGTACTGAGCTGCCGAG   | miRNA | miR-486-5p  |
| t0003278 | 21 | 97 TCTCCCTTCCCTGCCCTGGCTA     | miRNA | miR-4685-3p |
| t0003268 | 24 | 97 AAACCGTTACCATTACTGAGTAAA   | miRNA | miR-451     |
| t0003282 | 22 | 97 CATTGCAATTGTCTCGGTCTGA     | miRNA | miR-25      |
| t0003280 | 23 | 97 TGTCAGTTTGTCAAATACCCCAA    | miRNA | miR-223     |
| t0003269 | 20 | 97 TAGCAGCACGTA AAAAATTGG     | miRNA | miR-16      |
| t0003263 | 24 | 97 ACCACAGGGTAGAACCACGGAATC   | miRNA | miR-140     |
| t0003260 | 22 | 97 TCTGGGCAACAAAGTGAGACCT     | miRNA | miR-1285    |
| t0003283 | 22 | 97 GTACAGTACTGTGATAACTGAC     | miRNA | miR-101c    |
| t0003248 | 18 | 97 TACAGTACTGTGATAACT         | miRNA | miR-101     |
| t0003253 | 20 | 97 TGAGGTCGTAGATTGTATAG       | miRNA | let-7f      |
| t0003305 | 21 | 96 TATTGCACTCGTCCCGGCCAT      | miRNA | miR-92      |
| t0003286 | 22 | 96 AAACCGTTACCATTACTGACTT     | miRNA | miR-451     |
| t0003295 | 26 | 96 ACTTTGAAGACTGAAGTGAGAGGGG  | miRNA | miR-3526    |
| t0003306 | 22 | 96 AAAAGCTGGGTTGAGAGGGGGA     | miRNA | miR-320d    |
| t0003288 | 23 | 96 AAAAGCTGGTTTGAGAGGGCGAA    | miRNA | miR-320a    |
| t0003297 | 20 | 96 ACTGCAGTGAAGGCACTTGT       | miRNA | miR-17*     |
| t0003312 | 21 | 96 ACCACAGGGTAGAACCACAGA      | miRNA | miR-140     |
| t0003303 | 22 | 96 TACAGTACTGTGATAACTGAAC     | miRNA | miR-101     |
| t0003299 | 21 | 96 TGAGGTAGTAGAATGTATAGT      | miRNA | let-7f      |
| t0003317 | 21 | 96 TGCGGTAGTAGGTTGTGTGGT      | miRNA | let-7b      |
| t0003300 | 23 | 95 TGGAAGACTGGTGATATGTTGTT    | miRNA | miR-7-5p    |
| t0003293 | 21 | 95 TGCAGCACGTAAATATTGGCG      | miRNA | miR-16      |
| t0003294 | 22 | 95 TAGCAGCATATCATGGTTTACA     | miRNA | miR-15b     |
| t0003340 | 19 | 95 TAGCAGCACATCATGGGTT        | miRNA | miR-15b     |
| t0003334 | 18 | 95 GGATATCATCATATACTG         | miRNA | miR-144*    |
| t0003336 | 23 | 95 TGAGATGAAGCACTGTAGCTCTC    | miRNA | miR-143     |
| t0003321 | 24 | 95 TACCACAGGGTAGAATTACGGACA   | miRNA | miR-140     |
| t0003326 | 20 | 95 TGCGGTAGTAGATTGTATAG       | miRNA | let-7f      |
| t0003330 | 20 | 95 TGAAGTAGTAGATTGTATAG       | miRNA | let-7f      |
| t0003327 | 22 | 95 TGAGGTAGTCGGTTGTGTGGTT     | miRNA | let-7b      |
| t0003328 | 20 | 94 GTAGAGGAGATGGCGCAGGA       | miRNA | miR-877     |
| t0003329 | 22 | 94 TCTGGGCACAGGCGGATGGACT     | miRNA | miR-5107    |
| t0003318 | 26 | 94 CTTGCTATCTGGGCATGCTACTATGA | miRNA | miR-500b    |
| t0003349 | 21 | 94 ATCTGTAAGTACTGAGCTGCCCGA   | miRNA | miR-486-5p  |
| t0003363 | 21 | 94 ACTCCCACTGCTTCACTTGAC      | miRNA | miR-4301    |
| t0003342 | 21 | 94 TGAGGGGCAGAGAGCGATACT      | miRNA | miR-423-5p  |
| t0003344 | 22 | 94 TGGAAGGTAGACGGCCAGAGTT     | miRNA | miR-3190    |
| t0003347 | 20 | 94 TGGAAGGTAGACGGCCAGAG       | miRNA | miR-3190    |
| t0003345 | 23 | 94 GAGGGTTGGGTGGAGGCTCTATC    | miRNA | miR-296-3p  |
| t0003356 | 24 | 94 TTCAAGTAATCCAGGATAGGCTAG   | miRNA | miR-26a     |
| t0003352 | 22 | 94 TGGAAGAAAGGCAGTTCCTGA      | miRNA | miR-185     |
| t0003355 | 24 | 94 TAGCAGCACATCATGGTTTACAAA   | miRNA | miR-15b     |
| t0003354 | 21 | 94 ACCACAGGGTAGAACCATGGA      | miRNA | miR-140     |
| t0003384 | 22 | 94 TGCCACAGGGTAGAACCACGGA     | miRNA | miR-140     |
| t0003389 | 21 | 94 TCCCTGAGACCCTAACTTGTG      | miRNA | miR-125b-5p |
| t0003413 | 20 | 94 TGAGGTAGTAGATTTTATAG       | miRNA | let-7f      |
| t0003375 | 24 | 94 TGAGGTAGTAGATTGTATAGTTTG   | miRNA | let-7f      |
| t0003371 | 22 | 94 TGAGGTAATAGGTTGTGTGGTT     | miRNA | let-7b      |
| t0003387 | 21 | 94 TGAGGTAGTACGTTGTATAGT      | miRNA | let-7       |
| t0003382 | 22 | 94 TTAGGTAGTAGGTTGTATAGTT     | miRNA | let-7       |
| t0003401 | 22 | 93 TATTGCACTCGTCCCGGCCAT      | miRNA | miR-92      |
| t0003386 | 21 | 93 CAAAAGTGATCGTGGTTTTTG      | miRNA | miR-548t    |
| t0003395 | 20 | 93 TCCTGTAAGTACTGAGCTGCCCGA   | miRNA | miR-486-5p  |
| t0003365 | 22 | 93 TCCTGTAAGTACTGAGCTGCCCTAG  | miRNA | miR-486-5p  |
| t0003398 | 22 | 93 AAACCGTTACCATTACTAAGTT     | miRNA | miR-451     |

|          |    |                               |       |             |
|----------|----|-------------------------------|-------|-------------|
| t0003377 | 20 | 93 AAACAGTTACCATTACTGAG       | miRNA | miR-451     |
| t0003393 | 20 | 93 AAACCGTTATCATTACTGAG       | miRNA | miR-451     |
| t0003390 | 23 | 93 GATGAGGATGGATAGCAAGGAAG    | miRNA | miR-3605-5p |
| t0003396 | 25 | 93 CTTTCAGTCGGATGTTTGCAGCATC  | miRNA | miR-30a*    |
| t0003411 | 25 | 93 TGAAATGTTTAGGACCACTAGTATC  | miRNA | miR-203     |
| t0003408 | 23 | 93 TAAAGTGCTTATAGTGCAGGTAT    | miRNA | miR-20      |
| t0003368 | 22 | 93 CAACGGAATCCCAAAAGCAGTT     | miRNA | miR-191     |
| t0003379 | 22 | 93 TGGACAGAAAGGCAGTTCCTGA     | miRNA | miR-185     |
| t0003436 | 24 | 93 AATAGCAGCACGTAAATATTGGCG   | miRNA | miR-16      |
| t0003446 | 21 | 93 CCACAGGGTAGAACCACGGTA      | miRNA | miR-140     |
| t0003420 | 24 | 93 TCGGATCCGTCTGAGCTTGGTATC   | miRNA | miR-127     |
| t0003423 | 22 | 93 ACCGCACTGTGGTACTTGCTG      | miRNA | miR-106b*   |
| t0003421 | 21 | 93 TACAGTACTGTGATAATTGAA      | miRNA | miR-101     |
| t0003431 | 24 | 93 TGAGGTAGTAGTTTGTACAGTTGA   | miRNA | let-7g      |
| t0003437 | 23 | 92 TAAGGGCTGGGTCGGTCGGGCTG    | miRNA | miR-4651    |
| t0003434 | 25 | 92 AATCTGAGAAGGCGCACAAGGTTTG  | miRNA | miR-3200-5p |
| t0003425 | 23 | 92 ATGGAGAGAAAGGCAGTTCCTGA    | miRNA | miR-185     |
| t0003441 | 26 | 92 ACCACAGGGTAGAACCACGGAAGATC | miRNA | miR-140     |
| t0003422 | 23 | 92 TACAGTACTGTGATAACTGAAGT    | miRNA | miR-101     |
| t0003442 | 21 | 92 CTGAGGTAGTAGATTGTATAG      | miRNA | let-7f      |
| t0003415 | 20 | 92 TGAGGTAGTAGATTATATAG       | miRNA | let-7f      |
| t0003443 | 24 | 92 TGAGGTAGTAGATTGTATAGTTAG   | miRNA | let-7f      |
| t0003430 | 21 | 92 TGAGGTAGTAAATTGTATAGT      | miRNA | let-7f      |
| t0003438 | 22 | 92 TGAGGTAGTAAAGTTGTGTGGTT    | miRNA | let-7b      |
| t0003447 | 22 | 92 TGAGATAGTAGGTTGTGTGGTT     | miRNA | let-7b      |
| t0003435 | 21 | 92 TGAGTTAGTAGGTTGTGTGGA      | miRNA | let-7b      |
| t0003444 | 22 | 92 TGAGGTAGTAGGTTGAGTGGTT     | miRNA | let-7b      |
| t0003473 | 23 | 91 TGGAAAGACTAGTGATTTTGTGT    | miRNA | miR-7       |
| t0003474 | 21 | 91 AAACCGTTACAATTACTGAGT      | miRNA | miR-451     |
| t0003472 | 21 | 91 ATCAGCATTGTACAGGGCTAT      | miRNA | miR-4289    |
| t0003475 | 23 | 91 TGCGGGGCAGAGAGCGAGACTTT    | miRNA | miR-423-5p  |
| t0003482 | 23 | 91 TGAGGGGCAGAGAGCGAGACTGA    | miRNA | miR-423-5p  |
| t0003449 | 23 | 91 TGAGGGGCAGAGAGCGGACTTT     | miRNA | miR-423-5p  |
| t0003456 | 23 | 91 TGAGGGGCAGAAAGCGAGACTTT    | miRNA | miR-423-5p  |
| t0003469 | 21 | 91 ATCACATTGCCAGGGATTTAA      | miRNA | miR-23a     |
| t0003484 | 23 | 91 TAGCAGCACGTAAATATTGGCAA    | miRNA | miR-16b     |
| t0003448 | 22 | 91 AGCAGCACGTAAATATTGGCGT     | miRNA | miR-16      |
| t0003451 | 23 | 91 GTAGTGTTCCTACTTTATGGAA     | miRNA | miR-142-3p  |
| t0003452 | 25 | 91 TCCCTGAGACCCTAACTTGTGAATC  | miRNA | miR-125b-5p |
| t0003460 | 22 | 91 TGAGGAAGTAGTTTGTACAGTT     | miRNA | let-7g      |
| t0003501 | 22 | 91 TGAGGTAGTAGTATGTACAGTT     | miRNA | let-7g      |
| t0003493 | 20 | 91 TGAGGTAGTAGATTGTCTAG       | miRNA | let-7f      |
| t0003498 | 20 | 91 TGGGTAGTAGATTGTATAGT       | miRNA | let-7f      |
| t0003505 | 21 | 91 TGAGGTAGGAGTTGTGTGGT       | miRNA | let-7b      |
| t0003512 | 21 | 90 TGAGGTAGTAAGTTGTATTGT      | miRNA | miR-98      |
| t0003517 | 23 | 90 TATTGCATTTGTCCCGCCTGTA     | miRNA | miR-92a     |
| t0003523 | 22 | 90 TCCTGTACTGAGCTACCCCGAG     | miRNA | miR-486-5p  |
| t0003494 | 25 | 90 TGTAGAGCAGGGAGCAGGAAGCTGT  | miRNA | miR-4732-5p |
| t0003527 | 22 | 90 AAACCGTTACCATTACTGATTT     | miRNA | miR-451     |
| t0003525 | 21 | 90 AGTAGCATTGTACAGGGCTAT      | miRNA | miR-4289    |
| t0003510 | 21 | 90 CATCGGGAATGTCGTGTCCGT      | miRNA | miR-425*    |
| t0003518 | 23 | 90 TGAGGGTCAGAGAGCCGAGACTTT   | miRNA | miR-423-5p  |
| t0003508 | 24 | 90 AAAAGCTGGGTTGAGAGGGCGGAT   | miRNA | miR-320d    |
| t0003529 | 24 | 90 AAAGGTAGATAGAACAGGTCTTGA   | miRNA | miR-1839    |
| t0003514 | 23 | 90 TGAGGGAGTAGATTGTATAGTTG    | miRNA | miR-1827    |
| t0003528 | 23 | 90 TACCACAGGCTAGAACCACGGAC    | miRNA | miR-140     |
| t0003500 | 22 | 90 ACCACAGGGTAGAACAACGGAA     | miRNA | miR-140     |
| t0003572 | 19 | 90 AGCAGCATTGTACAGGGTT        | miRNA | miR-103a    |

|          |    |                                  |       |             |
|----------|----|----------------------------------|-------|-------------|
| t0003557 | 21 | 90 AGCAGCATTGTACATGGCTAT         | miRNA | miR-103a    |
| t0003565 | 24 | 90 GTACAGTACTGTGATAGCTGAATC      | miRNA | miR-101     |
| t0003554 | 23 | 90 TGAGGTAGTAGATTGTATAGGGA       | miRNA | let-7f-5p   |
| t0003576 | 22 | 90 TGAGGTAGTAGATTGTGTAGTA        | miRNA | let-7f      |
| t0003546 | 22 | 90 TGAGGTAGTAGGTTGTGTTCGTT       | miRNA | let-7b      |
| t0003537 | 24 | 90 TGAGGTAGTAGGTTGTGTGGTTTA      | miRNA | let-7b      |
| t0003540 | 20 | 89 AGGTGGAAGGTTGTAGGCAT          | miRNA | miR-965-5p  |
| t0003574 | 22 | 89 ATTGCACTTGTCCCGGCCTGTT        | miRNA | miR-92c     |
| t0003556 | 20 | 89 AAAAGTACTTGC GGATTTTG         | miRNA | miR-548k    |
| t0003575 | 21 | 89 TCCTGTACTGAGATGCCCCGA         | miRNA | miR-486-5p  |
| t0003562 | 21 | 89 TGGGGCTAGTGATGCAGGACG         | miRNA | miR-4489    |
| t0003564 | 22 | 89 TGAGGGGCAGAGCGCGAGACTT        | miRNA | miR-423-5p  |
| t0003551 | 21 | 89 TGAGGAGCAGAGAGCGAGACT         | miRNA | miR-423-5p  |
| t0003578 | 22 | 89 AAAAGCTGGGTTGAGAGGGAGT        | miRNA | miR-320d    |
| t0003568 | 22 | 89 AAAAGCTGGGTTGAGGGGGCGA        | miRNA | miR-320a    |
| t0003533 | 24 | 89 ATGACCTATGATTTGACAGACATC      | miRNA | miR-215     |
| t0003567 | 23 | 89 TGGAGAGAAAGGCAGTTCTTGAA       | miRNA | miR-185     |
| t0003555 | 21 | 89 TGGAGGGAAAGGCAGTTCCTG         | miRNA | miR-185     |
| t0003558 | 21 | 89 TAGCAGCACGTAAATTTTGGC         | miRNA | miR-16      |
| t0003588 | 22 | 89 ATAGCAGCACATCATGGTTTAC        | miRNA | miR-15b     |
| t0003605 | 23 | 89 TCAGTGCATCACAGA AACTTTGAA     | miRNA | miR-148b-3p |
| t0003601 | 23 | 89 TGAGATTAAGCACTGTAGCTATC       | miRNA | miR-143     |
| t0003592 | 21 | 89 ACCACGGGGTAGAACCACGGA         | miRNA | miR-140     |
| t0003620 | 22 | 89 TACCACAGGGTAGAACCACCGA        | miRNA | miR-140     |
| t0003602 | 22 | 89 GGAGGTAGTAGGTTGTGTGGTT        | miRNA | let-7b      |
| t0003616 | 22 | 89 TGAGGTAGTAGGTTGTGTGTTA        | miRNA | let-7b      |
| t0003599 | 23 | 89 CTGAGGTAGTAGGTTGTATAGTT       | miRNA | let-7       |
| t0003609 | 24 | 88 CAAAGTGCTGTTCTGTCAGGTAGA      | miRNA | miR-93      |
| t0003621 | 22 | 88 AAGACTGAAGTGGAGAAGGGTT        | miRNA | miR-739     |
| t0003608 | 20 | 88 GACTATAGA AACTTTCCCCCT        | miRNA | miR-625*    |
| t0003612 | 24 | 88 TCCTGTACTGAGCTGCCCCGAGAG      | miRNA | miR-486-5p  |
| t0003622 | 23 | 88 TGAGGGGCAGCGAGCGAGACTTT       | miRNA | miR-423-5p  |
| t0003595 | 24 | 88 GGCTGGTCCGAGTGCAGTGGTGTT      | miRNA | miR-3135b   |
| t0003619 | 20 | 88 TGACCTATGAATTGACAGCT          | miRNA | miR-192     |
| t0003583 | 19 | 88 AGGTAGATAGAACAGGTCT           | miRNA | miR-1839    |
| t0003586 | 29 | 88 TTTGGCAATGGTAGAACTCACACTGGATC | miRNA | miR-182     |
| t0003614 | 23 | 88 AACATTCATTGCTGTCGGTGGGA       | miRNA | miR-181b    |
| t0003615 | 22 | 88 TAGCAGCACATCATGGTTCACA        | miRNA | miR-15b     |
| t0003627 | 23 | 88 TAAAGTGCTGACAGTGCAGATGA       | miRNA | miR-106b    |
| t0003629 | 22 | 88 AACAGCATTGTACAGGGCTATG        | miRNA | miR-103a    |
| t0003671 | 22 | 88 TGAGGTAGTAGTTTGTACAGTC        | miRNA | let-7g      |
| t0003673 | 22 | 88 TGAGGTAGTAGCTTGTGTGGTT        | miRNA | let-7b      |
| t0003656 | 22 | 88 TGAGGTAGTAGGTTGTGAGGTT        | miRNA | let-7b      |
| t0003654 | 18 | 88 TGAGGTAGTAGGTTGTAG            | miRNA | let-7       |
| t0003639 | 21 | 87 TCCTGTACTGAGCTGCACCGA         | miRNA | miR-486-5p  |
| t0003637 | 23 | 87 TGAGGGAGTAGGTTGTGTGGTTA       | miRNA | miR-4510    |
| t0003649 | 20 | 87 AAACCGTTACCATTAGTGAG          | miRNA | miR-451     |
| t0003661 | 22 | 87 TGAGGGGCAGAGATCGAGACTT        | miRNA | miR-423-5p  |
| t0003658 | 23 | 87 TTCAAGTAATCCAGGATAGGCTA       | miRNA | miR-26a     |
| t0003665 | 24 | 87 TTCAAGTAATCCAGGATAGGCTAA      | miRNA | miR-26a     |
| t0003660 | 23 | 87 CAACGGAATCCAAAAGCAGCTG        | miRNA | miR-191     |
| t0003640 | 23 | 87 CTGGAGAGAAAGGCAGTTCCTGA       | miRNA | miR-185     |
| t0003663 | 25 | 87 TGGACGGAGA AACTGATAAGGGTATC   | miRNA | miR-184-3p  |
| t0003638 | 19 | 87 TAGCATGTAAATATTGGCG           | miRNA | miR-16c     |
| t0003647 | 20 | 87 TAGCAGCACATCATGGTCTA          | miRNA | miR-15b     |
| t0003662 | 19 | 87 TAGCAGCGCATCATGGTTT           | miRNA | miR-15b     |
| t0003674 | 22 | 87 ACCACAGGGTAGAATTACGGAT        | miRNA | miR-140     |
| t0003732 | 22 | 87 TACCACAGGGTAGAACCACGTA        | miRNA | miR-140     |

|          |    |                                 |       |            |
|----------|----|---------------------------------|-------|------------|
| t0003714 | 21 | 87 TGAGGTAGTAGTTTGTGTTGT        | miRNA | let-7i     |
| t0003728 | 22 | 87 GAGGTAGTAGATTGTATAGTTT       | miRNA | let-7f     |
| t0003681 | 25 | 87 AGAGGTAGTAGGTTGCATAGTTAAA    | miRNA | let-7d     |
| t0003706 | 22 | 87 TGAGGTAGTAGGTTGTGTGATT       | miRNA | let-7b     |
| t0003708 | 23 | 87 TGAGGCAGTAGGTTGTGTGGTTA      | miRNA | let-7b     |
| t0003713 | 20 | 87 TGAGGTAGTAGGTTGTGTTT         | miRNA | let-7b     |
| t0003712 | 19 | 86 CTATACACTTACTACTTT           | miRNA | miR-98*    |
| t0003717 | 20 | 86 ATTGCACTTGTCCCGGCCTG         | miRNA | miR-92c    |
| t0003707 | 23 | 86 CATGCCTTGAGTGTAGGACCGTT      | miRNA | miR-532-5p |
| t0003709 | 20 | 86 TAGCAGCGGGAACAGTTCAA         | miRNA | miR-503    |
| t0003727 | 20 | 86 TCCTGTACTGAGCTGCCTCG         | miRNA | miR-486-5p |
| t0003683 | 21 | 86 TCCTGTACTGAGCTGCCACGA        | miRNA | miR-486-5p |
| t0003701 | 20 | 86 TGTACTGAGCTGCCCGAGA          | miRNA | miR-486-5p |
| t0003687 | 20 | 86 AAATCGTTACCATTACTGAG         | miRNA | miR-451    |
| t0003693 | 22 | 86 AAACCTTTACCACTACTGAGTT       | miRNA | miR-451    |
| t0003684 | 24 | 86 TCCCACTGCTTCACTTGACTAGCC     | miRNA | miR-4301   |
| t0003718 | 22 | 86 AACGGAATTCCAAAAGCAGCTG       | miRNA | miR-191    |
| t0003725 | 22 | 86 TGGAGAGAAAGGCTGTTCTCTGA      | miRNA | miR-185    |
| t0003733 | 22 | 86 TAGCAGCACATCATGTTTTACA       | miRNA | miR-15b    |
| t0003769 | 25 | 86 CCCATAAAGTAGAAAGCACTACATC    | miRNA | miR-142    |
| t0003764 | 23 | 86 TACCACAGGGGAGAACCACGGAA      | miRNA | miR-140    |
| t0003741 | 22 | 86 CTCGGCGTGGCGTCGGTTCGTGG      | miRNA | miR-1307   |
| t0003734 | 27 | 85 AGGGCTGGGTTCGGTCGGGCTGGGGCGC | miRNA | miR-4651   |
| t0003753 | 21 | 85 AAAAGCTGGGTTTCAGAGGGCG       | miRNA | miR-320a   |
| t0003754 | 23 | 85 TGGCTCAGTTCAGCAGGAACAGA      | miRNA | miR-24b    |
| t0003772 | 23 | 85 TGGAGAGAAAGGAAGTTCCTGAT      | miRNA | miR-185    |
| t0003765 | 21 | 85 TTGAGAGAAAGGCAGTTCCTG        | miRNA | miR-185    |
| t0003766 | 20 | 85 TGGAGAGAAAGGCAGTTCCT         | miRNA | miR-185    |
| t0003752 | 22 | 85 TGGAGAGAAAGGCAGTTCGTGA       | miRNA | miR-185    |
| t0003767 | 18 | 85 AAGGTAGATAGAACAGGT           | miRNA | miR-1839   |
| t0003761 | 18 | 85 TAGCAGCACATCATGTTT           | miRNA | miR-15b    |
| t0003758 | 20 | 85 CAGTGCAATGTTAAAAGGGC         | miRNA | miR-130a   |
| t0003735 | 21 | 85 AGAGGTAGTAGATTGTATAGT        | miRNA | let-7f     |
| t0003737 | 24 | 85 AGAGGTAGTAGGTTGCATAGTTAA     | miRNA | let-7d     |
| t0003744 | 21 | 85 ATAGGTAGTAGGTTGCATAGT        | miRNA | let-7d     |
| t0003784 | 22 | 85 TGAGGTAGTAGGTTGGTGTGGTT      | miRNA | let-7b     |
| t0003797 | 20 | 84 AAACCGTTACCATTAATGAG         | miRNA | miR-451    |
| t0003800 | 23 | 84 TGACGGGCAGAGAGCGAGACTTT      | miRNA | miR-423-5p |
| t0003781 | 20 | 84 AGGGGCAGAGAGCGAGACTT         | miRNA | miR-423-5p |
| t0003796 | 23 | 84 AATTGCACGGTATCCATCTGTAT      | miRNA | miR-363    |
| t0003804 | 23 | 84 AGCTACATCTGGCTACTGGGTCA      | miRNA | miR-222    |
| t0003815 | 20 | 84 CAACGGAATTCCAAAAGCAG         | miRNA | miR-191    |
| t0003818 | 20 | 84 TGGAGAGAAAGGCAGTTCCTG        | miRNA | miR-185    |
| t0003790 | 19 | 84 CGAATCATTATTTGCTGCT          | miRNA | miR-15b*   |
| t0003786 | 22 | 84 TAGCAGCACATAATGGTTTTTTG      | miRNA | miR-15a    |
| t0003814 | 21 | 84 TACCACAGGGTAGAACCCTCGG       | miRNA | miR-140    |
| t0003810 | 23 | 84 TACCACAGGGTAGAACCACGGGC      | miRNA | miR-140    |
| t0003825 | 23 | 84 CCGCACTGTGGTACTTGCTGAA       | miRNA | miR-106b*  |
| t0003827 | 22 | 84 AGCAGCATTATACAGGGCTATG       | miRNA | miR-103a   |
| t0003830 | 24 | 84 TGAGGTAGTAGATTGTATAGTATC     | miRNA | let-7f     |
| t0003832 | 25 | 84 TGAGGTAGTAGGTTGTGTGGTTAAT    | miRNA | let-7b     |
| t0003876 | 22 | 84 TGAGGTAGTAGGTTGGTGGTT        | miRNA | let-7b     |
| t0003867 | 22 | 83 TATTGCACTCGTCCCGGCCTTA       | miRNA | miR-92     |
| t0003866 | 20 | 83 ATCAGCATTGTACAGGGCTA         | miRNA | miR-4289   |
| t0003846 | 19 | 83 CAGCAGCAATTCATGTTTT          | miRNA | miR-424    |
| t0003851 | 21 | 83 TGAGGGCCAGAGAGCGAGACT        | miRNA | miR-423-5p |
| t0003845 | 22 | 83 TTATAAAGCAATGAGACTGATA       | miRNA | miR-340-5p |
| t0003831 | 22 | 83 AAAAGCTTGGTTGAGAGGGCGA       | miRNA | miR-320a   |



|          |    |                                 |       |            |
|----------|----|---------------------------------|-------|------------|
| t0003857 | 21 | 83 AGGTAGATAGAACAGGTCTTA        | miRNA | miR-1839   |
| t0003868 | 22 | 83 TAGCAGCACGTAATATGGGCG        | miRNA | miR-16     |
| t0003864 | 23 | 83 CTAGACTGAAGCTCCTTGAGGTA      | miRNA | miR-151-3p |
| t0003839 | 25 | 83 AGATGAAGCACTGTAGCTCTTTATC    | miRNA | miR-143    |
| t0003849 | 26 | 83 AGCAGCATTGTACAGGGCTATGAATC   | miRNA | miR-103a   |
| t0003841 | 20 | 83 TGAGGTAGAAGATTGTATAG         | miRNA | let-7f     |
| t0003854 | 20 | 83 TGAGGAAGTAGGTTGTATAG         | miRNA | let-7      |
| t0003911 | 20 | 82 TGGGTTTACGTTGGGAGAAC         | miRNA | miR-629    |
| t0003892 | 21 | 82 CTCCACACCCAAGGCTTGCA         | miRNA | miR-532-3p |
| t0003912 | 23 | 82 TCTTGTACTGAGCTGCCCGAGT       | miRNA | miR-486-5p |
| t0003904 | 22 | 82 AAATTGTTACCATTACTGAGTT       | miRNA | miR-451    |
| t0003915 | 24 | 82 TGAGGGGCAGAGAGCGAGACTAGA     | miRNA | miR-423-5p |
| t0003910 | 23 | 82 AATTGCACGGTATCCATCTGTAG      | miRNA | miR-363    |
| t0003883 | 23 | 82 TGTA AACATCCCCGACTGGAAGC     | miRNA | miR-30d    |
| t0003907 | 22 | 82 CATTCCACTTGTCTCGGTCTGA       | miRNA | miR-25     |
| t0003908 | 21 | 82 TGGGAGAAAGGCAGTTCCTGA        | miRNA | miR-185    |
| t0003920 | 22 | 82 TCGAGAGAAAGGCAGTTCCTGA       | miRNA | miR-185    |
| t0003916 | 21 | 82 ATGGCACTGGTAGAATTCCTACT      | miRNA | miR-183    |
| t0003902 | 20 | 82 CATAAAGTAGAAAGCACTAC         | miRNA | miR-142-5p |
| t0003899 | 22 | 82 CCCATAAAGTAGAAAGCACTAC       | miRNA | miR-142    |
| t0003962 | 24 | 82 TGAGGTAGTAGTTTGTGCTGTAA      | miRNA | let-7i     |
| t0003958 | 23 | 82 AGAGGTAGTAGTTGCATAGTAA       | miRNA | let-7d     |
| t0003927 | 21 | 82 TGAGGTAGTACGTTGTGTGGT        | miRNA | let-7b     |
| t0003952 | 22 | 81 TATTGCACTCGTCCCGGCCTTT       | miRNA | miR-92     |
| t0003930 | 19 | 81 TGCGGGGCTAGGGCTAACA          | miRNA | miR-744    |
| t0003965 | 20 | 81 AAGACTGAAGTGGAGAAGGG         | miRNA | miR-739    |
| t0003948 | 20 | 81 AAAAGTAATCGTGGTCTTTG         | miRNA | miR-548j   |
| t0003945 | 22 | 81 TCCTGTACTGAGCTGCCACGAG       | miRNA | miR-486-5p |
| t0003950 | 22 | 81 TGAGGGAGTAGGTTGTGTGGTA       | miRNA | miR-4510   |
| t0003960 | 21 | 81 AAACCGTTACCGTTACTGAGT        | miRNA | miR-451    |
| t0003963 | 21 | 81 TGAGGGGCAGAGAGCGAGAGT        | miRNA | miR-423-5p |
| t0003966 | 27 | 81 TGTA AACATCCTCGACTGGAAGCTATC | miRNA | miR-30d    |
| t0003957 | 23 | 81 TGTGCAAATCCATGCAAAACTGA      | miRNA | miR-19b    |
| t0003961 | 26 | 81 CAACGGAATCCAAAAGCAGCTGATC    | miRNA | miR-191    |
| t0003935 | 24 | 81 CAACGGAATCCAAAAGCAGCTGT      | miRNA | miR-191    |
| t0003931 | 20 | 81 TACAGTATAGATGATGTTCT         | miRNA | miR-144    |
| t0003989 | 23 | 81 TACCACAAGGTAGAACCACGGAC      | miRNA | miR-140    |
| t0003980 | 21 | 81 TACCCTGTAGATCCGAATTTG        | miRNA | miR-10a    |
| t0004007 | 22 | 81 AAGAGGTAGTAGGTTGCATAGT       | miRNA | let-7d     |
| t0004000 | 22 | 81 TGAGGTAGTATGTTGTATAGTT       | miRNA | let-7      |
| t0003988 | 20 | 80 AGAGGAGATGGCGCAGGGGA         | miRNA | miR-877    |
| t0003990 | 21 | 80 TCCTGTACTGAGCTACCCCGA        | miRNA | miR-486-5p |
| t0003981 | 27 | 80 AAACCGTTACCATTACTGAGTTTAAAA  | miRNA | miR-451    |
| t0003972 | 20 | 80 AAACCGTTACCATTACTGAA         | miRNA | miR-451    |
| t0003967 | 21 | 80 TGAGGGGCAGAGAGGGAGACT        | miRNA | miR-423-5p |
| t0003984 | 23 | 80 TTTTCAGTCGGATGTTTACAGTA      | miRNA | miR-30b-3p |
| t0003995 | 21 | 80 TGGAGAGAAAGGAGTTCCTG         | miRNA | miR-185    |
| t0004006 | 23 | 80 TGAGATGAAGCACTGTACCTATC      | miRNA | miR-143    |
| t0003968 | 23 | 80 TACCACAGGGTAGAACTACGGAC      | miRNA | miR-140    |
| t0003975 | 19 | 80 ACTCGGCGTGGCGTCGGTC          | miRNA | miR-1307   |
| t0004011 | 22 | 80 CATTATTACTTTTGGTACGCGA       | miRNA | miR-126-5p |
| t0004005 | 21 | 80 CGTACCGTGAGTAATAATGCG        | miRNA | miR-126    |
| t0003997 | 20 | 80 AGCAGCATTGTACAGGTCTA         | miRNA | miR-103a   |
| t0004017 | 22 | 80 AGCAGCATTGTACAGGGTTATG       | miRNA | miR-103a   |
| t0004033 | 19 | 80 TGAGGTAGTAGATTGTTAG          | miRNA | let-7j     |
| t0004042 | 22 | 80 TGAGGTAGCAGTTTGTACAGTT       | miRNA | let-7g     |
| t0004054 | 22 | 80 TGAGGTAGTAGTTTGTACAGGT       | miRNA | let-7g     |
| t0004065 | 20 | 79 AGGGACGGGACGCGGTGCAA         | miRNA | miR-92b*   |

|          |    |                                |       |              |
|----------|----|--------------------------------|-------|--------------|
| t0004030 | 25 | 79 TATTGCACTTGTCCCGGCCTGTAGA   | miRNA | miR-92a      |
| t0004048 | 21 | 79 TAAGGGCTGGGTCCGGTCGGGC      | miRNA | miR-4651     |
| t0004025 | 18 | 79 AGGGCTGGGTCCGGTCGGG         | miRNA | miR-4651     |
| t0004057 | 20 | 79 AGTAGCATTGTACAGGGCTA        | miRNA | miR-4289     |
| t0004050 | 21 | 79 TGGGGGGCAGAGAGCGAGACT       | miRNA | miR-423-5p   |
| t0004034 | 19 | 79 AGAGGTAGGTTGCATAGTT         | miRNA | miR-352      |
| t0004064 | 26 | 79 TAATACTGCCGGTAATGATGGAATC   | miRNA | miR-200c     |
| t0004044 | 21 | 79 TCTGACCTATGAATTGACAGC       | miRNA | miR-192      |
| t0004049 | 20 | 79 GAGAGAAAGGCAGTTCCTGA        | miRNA | miR-185      |
| t0004043 | 21 | 79 TGGAGAGATAGGCAGTTCCTG       | miRNA | miR-185      |
| t0004061 | 24 | 79 ATAGCAGCACGTAAATATTGGCGT    | miRNA | miR-16       |
| t0004067 | 20 | 79 TAGCAGCACGTAATATTTG         | miRNA | miR-16       |
| t0004094 | 23 | 79 TAGCAGCATCATGGTTTAAAA       | miRNA | miR-15b      |
| t0004132 | 24 | 79 TACCACAGGGTAGAAACACGGACA    | miRNA | miR-140      |
| t0004089 | 21 | 79 ACCACAGCGTAGAACCACGGA       | miRNA | miR-140      |
| t0004113 | 19 | 79 TGAGTTAGTAGTTTGTGCT         | miRNA | let-7i       |
| t0004079 | 20 | 79 TGAGGTAGTAGATTGGATAG        | miRNA | let-7f       |
| t0004127 | 21 | 79 TTAGGTAGTAGGTTGTATAGT       | miRNA | let-7        |
| t0004118 | 22 | 79 TGCGGTAGTAGGTTGTATAGTT      | miRNA | let-7        |
| t0004131 | 21 | 78 TGTCTTACTCCCTCAGGCACA       | miRNA | miR-550a*    |
| t0004123 | 21 | 78 TCCTGTACTGAGCTGCCCAA        | miRNA | miR-486-5p   |
| t0004106 | 28 | 78 TCCTGTACTGAGCTGCCCGAGACGGTA | miRNA | miR-486-5p   |
| t0004107 | 26 | 78 AAACCGTTACTATTACTGAGTTTAGT  | miRNA | miR-451      |
| t0004072 | 20 | 78 AAACCGTTATTACTGAG           | miRNA | miR-451      |
| t0004124 | 22 | 78 TGAGGGGCGGAGAGCGAGACTT      | miRNA | miR-423-5p   |
| t0004087 | 23 | 78 GGAGGAACCTTGGAGCTTCGGCA     | miRNA | miR-3928     |
| t0004098 | 25 | 78 AAAAGCTGGGTTGAGAGGGCGATAT   | miRNA | miR-320a     |
| t0004116 | 24 | 78 AAAAGCTGGGTTGAGAGGGCGATG    | miRNA | miR-320a     |
| t0004080 | 22 | 78 AAAAGCTGCGTTGAGAGGGCGA      | miRNA | miR-320a     |
| t0004122 | 19 | 78 AAGTAATCCAGGATAGGCT         | miRNA | miR-26a      |
| t0004121 | 25 | 78 TAGGTAGTTTCATGTTGTTGGGATC   | miRNA | miR-196b     |
| t0004128 | 24 | 78 TACCACAGGGTAGAACCATGGACA    | miRNA | miR-140      |
| t0004158 | 21 | 78 ACCACAGGGTAGATCCACGGA       | miRNA | miR-140      |
| t0004179 | 22 | 78 TACCACAGGGAAGAACCACGGA      | miRNA | miR-140      |
| t0004186 | 23 | 78 TGAGGTAGTAGATTGTATAGTGT     | miRNA | let-7f       |
| t0004164 | 21 | 78 TGAGGTAGTAGGATGTGTGGT       | miRNA | let-7b       |
| t0004165 | 26 | 77 AAACCGTTACCATTACTGAGTTTAAA  | miRNA | miR-451      |
| t0004194 | 22 | 77 AAACCATTACCATTACTGAGTT      | miRNA | miR-451      |
| t0004155 | 18 | 77 AACTTTGAAGACTGAAGT          | miRNA | miR-3526     |
| t0004145 | 21 | 77 CGGAGAGAAAGGCAGTTCCTG       | miRNA | miR-185      |
| t0004148 | 22 | 77 TGAGGGAGGAGATTGTATAGTT      | miRNA | miR-1827     |
| t0004175 | 20 | 77 AAGCGGCGATGGCGGAGCTG        | miRNA | miR-1636     |
| t0004163 | 20 | 77 TAGCAGCACATAATGCTTTG        | miRNA | miR-15a      |
| t0004157 | 22 | 77 TAACACAGGGTAGAACCACGGA      | miRNA | miR-140      |
| t0004139 | 22 | 77 TACCGCAGGGTAGAACCACGGA      | miRNA | miR-140      |
| t0004144 | 20 | 77 TGAGATAGTAGATTGTATAG        | miRNA | let-7f       |
| t0004188 | 22 | 77 TGAGGTAGTAGTTATATAGTT       | miRNA | let-7        |
| t0004141 | 20 | 76 CTATACAACCTTACTACTTTC       | miRNA | miR-98*      |
| t0004153 | 21 | 76 GGTGGAAGGTTGTAGGCATGT       | miRNA | miR-965-5p   |
| t0004197 | 23 | 76 AAAGCTGGGTTGAGAGGGCGTTT     | miRNA | miR-320d     |
| t0004223 | 24 | 76 AAAAGCTGGGTTGAGAGGGCGACA    | miRNA | miR-320a     |
| t0004233 | 23 | 76 AAAAGCTGGGTTTAGAGGGCGAT     | miRNA | miR-320a     |
| t0004225 | 21 | 76 TGACTGGGGCGGGACATCTGT       | miRNA | miR-219-2-3p |
| t0004206 | 20 | 76 TAGCAGCACGTAATATCGG         | miRNA | miR-16       |
| t0004204 | 21 | 76 ACCACAGGGTGAACCACGGA        | miRNA | miR-140      |
| t0004219 | 23 | 76 TACCACAGGGCAGAACCACGGAC     | miRNA | miR-140      |
| t0004241 | 22 | 76 AGCAGCATTGTACAGGGCTAAA      | miRNA | miR-107      |
| t0004244 | 20 | 76 ACAGTACTGTGATAACTGAA        | miRNA | miR-101c     |

|          |    |                                 |       |             |
|----------|----|---------------------------------|-------|-------------|
| t0004201 | 22 | 76 TGAGGCAGTAGTTTGTACAGTT       | miRNA | let-7g      |
| t0004247 | 20 | 76 GAGGTAGTAGGTTGCATAGT         | miRNA | let-7d      |
| t0004273 | 21 | 76 TGCGGTAGTAGGTTGTATAGT        | miRNA | let-7       |
| t0004255 | 20 | 76 TGAGGTGGTAGGTTGTATAG         | miRNA | let-7       |
| t0004302 | 22 | 76 TAAGGTAGTAGGTTGTATAGTT       | miRNA | let-7       |
| t0004286 | 19 | 75 AATGGCGCCACTAGGGTTG          | miRNA | miR-652     |
| t0004293 | 22 | 75 TCCTGTACTAAGCTGCCCCGAG       | miRNA | miR-486-5p  |
| t0004284 | 23 | 75 AAACAGTTACCATTACTGAGTTT      | miRNA | miR-451     |
| t0004294 | 23 | 75 AAACCGTTACCATTACTGATTTT      | miRNA | miR-451     |
| t0004272 | 21 | 75 TGAGGGGCAGAGAGCGTGACT        | miRNA | miR-423-5p  |
| t0004274 | 22 | 75 TGAGGAGCAGAGAGCGAGACTT       | miRNA | miR-423-5p  |
| t0004287 | 24 | 75 AAAAGCTGGGTTGAGAGGGCATAA     | miRNA | miR-320d    |
| t0004278 | 24 | 75 AAAAGCTGGGTTGAGAGGGCGATC     | miRNA | miR-320a    |
| t0004276 | 25 | 75 AAAAGCTGGGTTGAGAGGGCGAAAG    | miRNA | miR-320a    |
| t0004283 | 23 | 75 TGAAGGTAGACGGCCAGAGAGA       | miRNA | miR-3190    |
| t0004280 | 21 | 75 CATTGCACTTGTCTCGGTCTA        | miRNA | miR-25      |
| t0004291 | 24 | 75 CTGACCTATGAATTGACAGCCATC     | miRNA | miR-192     |
| t0004296 | 22 | 75 TAGCAGCACGTAAATAATGGCG       | miRNA | miR-16      |
| t0004330 | 23 | 75 CAGTGCAATGATGAAAGGGCATA      | miRNA | miR-130b    |
| t0004309 | 21 | 75 AGCAGCATTGTACAGGGCATT        | miRNA | miR-107b    |
| t0004329 | 26 | 75 ACCCTGTAGATCCGAATTTGTGAATC   | miRNA | miR-10-5p   |
| t0004358 | 22 | 75 GCAGCATTGTACAGGGCTATGA       | miRNA | miR-103a    |
| t0004323 | 20 | 75 TGATGTAGTAGATTGTATAG         | miRNA | let-7f      |
| t0004359 | 21 | 75 AGAGGTAGTAGGGTGCATAGT        | miRNA | let-7d      |
| t0004355 | 21 | 75 TGAGGTAGTAGGTTGTGAGGT        | miRNA | let-7b      |
| t0004334 | 21 | 75 TGAGGTAGTAGGTCGTGTGGT        | miRNA | let-7b      |
| t0004348 | 20 | 74 ATTCTAATTTCTCCACGTCT         | miRNA | miR-576-5p  |
| t0004317 | 22 | 74 TATCCACACAAACACACAGGCT       | miRNA | miR-467f    |
| t0004332 | 22 | 74 GAATGTTGCTCGGTGAACCCCT       | miRNA | miR-409-3p  |
| t0004360 | 24 | 74 TTCAAGTAATCCAGGATAGGCTAT     | miRNA | miR-26a     |
| t0004345 | 20 | 74 AACTGGCCTACAAAGTCCCA         | miRNA | miR-193     |
| t0004336 | 24 | 74 CAACGGAATCTCAAAGCAGCTGA      | miRNA | miR-191     |
| t0004343 | 26 | 74 CAAAGAATTCTCCTTTTGGGCTTATC   | miRNA | miR-186     |
| t0004315 | 19 | 74 AAGGTAGATAGAACAGGTC          | miRNA | miR-1839    |
| t0004331 | 21 | 74 AACCCTGACCGTTGACTGTA         | miRNA | miR-181a-2* |
| t0004353 | 20 | 74 ATCCCACCGCTGCCACCAAG         | miRNA | miR-1260b   |
| t0004342 | 22 | 74 AAGCAGCATTGTACAGGGCTAT       | miRNA | miR-103a    |
| t0004313 | 21 | 74 TACATTACTGTGATAACTGAA        | miRNA | miR-101     |
| t0004340 | 22 | 74 TTTGAGGTAGTAGATTGTATAG       | miRNA | let-7f      |
| t0004389 | 22 | 74 TGATGTAGTAGGTTGTGTGGTA       | miRNA | let-7b      |
| t0004375 | 22 | 74 TGAGGTAGTTGGTTGTATAGTT       | miRNA | let-7       |
| t0004413 | 23 | 73 GGGAGCCAGGAAGTATTGATGTT      | miRNA | miR-505*    |
| t0004374 | 28 | 73 TCCTGTACTGAGCTGCCCCGAGACGGCT | miRNA | miR-486-5p  |
| t0004376 | 29 | 73 TCCTGTACTGAGCTGCCCCGAGACGGCA | miRNA | miR-486-5p  |
| t0004399 | 25 | 73 CGGCGGCGGCGACTCTGGACGCGAG    | miRNA | miR-3885-5p |
| t0004406 | 22 | 73 ACAAAAAAAAAAAGCCCAACCCT      | miRNA | miR-3613-3p |
| t0004383 | 22 | 73 ACCTGGCATAACAATGTAGATTT      | miRNA | miR-221*    |
| t0004377 | 21 | 73 TGGGGAGAAAGGCAGTTCCTG        | miRNA | miR-185     |
| t0004392 | 22 | 73 AACATTC AATGCTGTCTGGTGAG     | miRNA | miR-181a    |
| t0004396 | 24 | 73 TAGCAGCACGTAAATATTGGCAAA     | miRNA | miR-16b     |
| t0004371 | 20 | 73 TAGTAGCACATCATGGTTTA         | miRNA | miR-15b     |
| t0004366 | 21 | 73 TAGCAGCACATAATGGTTTTT        | miRNA | miR-15a     |
| t0004381 | 22 | 73 TACCACAGGGTAGAACGACGGA       | miRNA | miR-140     |
| t0004409 | 23 | 73 TGAGGTAGTAGATTGTTGAGAGT      | miRNA | let-7j      |
| t0004454 | 20 | 73 AGAGGGAGTAGGTTGCATAG         | miRNA | let-7d      |
| t0004414 | 21 | 73 TGAGGTAATAGGTTGTGTGGT        | miRNA | let-7b      |
| t0004451 | 21 | 73 TGAGGTAGTAGGTTGGTGTGGT       | miRNA | let-7b      |
| t0004453 | 22 | 72 AGGTGGAAGGTTGTAGGCATGT       | miRNA | miR-965-5p  |

|          |    |                                 |       |             |
|----------|----|---------------------------------|-------|-------------|
| t0004460 | 23 | 72 GTAGAGGAGATGGCGCAGGGGAT      | miRNA | miR-877     |
| t0004448 | 23 | 72 AAGGTTACTTGTTAGTTCAGATC      | miRNA | miR-872     |
| t0004457 | 25 | 72 AGGGCGCGCGGGTTCGGGGCGGCGGT   | miRNA | miR-638     |
| t0004462 | 23 | 72 TGTAGAGCAGGGAGCAGGAAGTA      | miRNA | miR-4732-5p |
| t0004422 | 20 | 72 TTTGGAGGAGATGCGGTTAT         | miRNA | miR-4443    |
| t0004459 | 21 | 72 TGAGGGGCAGAGAGCGACACT        | miRNA | miR-423-5p  |
| t0004426 | 23 | 72 AAAAGCTGTGTTGAGAGGGCGAT      | miRNA | miR-320a    |
| t0004418 | 21 | 72 AGCTTTTGGGAATTCAGGTAT        | miRNA | miR-3140-3p |
| t0004425 | 24 | 72 TAGCTTATCAGACTGATGTTGACA     | miRNA | miR-21      |
| t0004471 | 25 | 72 TGGAGAGAAAGGCAGTTCCTGAATC    | miRNA | miR-185     |
| t0004444 | 25 | 72 TAGCAGCACGTAATATTGGCGATC     | miRNA | miR-16      |
| t0004449 | 22 | 72 TAGCAGCACGAAAATATTGGCG       | miRNA | miR-16      |
| t0004514 | 26 | 72 CTAGACTGAGGCTCCTTGAGGAAATC   | miRNA | miR-151-3p  |
| t0004539 | 22 | 72 TACCACAGGGTAGAACC CGGA       | miRNA | miR-140     |
| t0004542 | 22 | 72 TACCACAGGGTGAACCACGGA        | miRNA | miR-140     |
| t0004502 | 23 | 72 AGCAGCATTCTACAGGGCTATGA      | miRNA | miR-103a    |
| t0004527 | 22 | 72 TGAGGTAGTAGTTTGTAGAGTT       | miRNA | let-7g      |
| t0004530 | 20 | 72 TGAGGTAGTAGATTGTAAG          | miRNA | let-7f      |
| t0004544 | 20 | 72 TGAGGTAGTAGTTTGTGGT          | miRNA | let-7a      |
| t0004493 | 21 | 72 TGAGGTAGTTGGTTGTATAGT        | miRNA | let-7       |
| t0004518 | 26 | 71 TCAATCCGTAGTGCATTGCAGAATC    | miRNA | miR-932-5p  |
| t0004482 | 22 | 71 AGAGGAGATGGCGCAGGGGACT       | miRNA | miR-877     |
| t0004524 | 22 | 71 TCCTGCACTGAGCTGCCCGAG        | miRNA | miR-486-5p  |
| t0004504 | 22 | 71 TCCTGTACTGAGCTGCCCGGG        | miRNA | miR-486-5p  |
| t0004509 | 23 | 71 TTCTGTACTGAGCTGCCCGAGA       | miRNA | miR-486-5p  |
| t0004503 | 21 | 71 ATCCTGTACTGAGCTGCCCGG        | miRNA | miR-486-5p  |
| t0004506 | 21 | 71 AAACCGTTACCACTACTGAGT        | miRNA | miR-451     |
| t0004538 | 23 | 71 TGAGGCGCAGAGAGCGAGACTTT      | miRNA | miR-423-5p  |
| t0004523 | 28 | 71 TTGAAGACTGAAGTGGAGAAGGGTTTCT | miRNA | miR-3526    |
| t0004488 | 22 | 71 AAAAGCTGGGTTGAGAGGGCTA       | miRNA | miR-320d    |
| t0004511 | 21 | 71 AAAAGCTGGGTTGAGATGGCG        | miRNA | miR-320a    |
| t0004507 | 23 | 71 TGTAACATCCTACACACTCAGC       | miRNA | miR-30c     |
| t0004505 | 22 | 71 ATGGAGAGAAAGGCAGTTCCTG       | miRNA | miR-185     |
| t0004561 | 20 | 71 TAGCAGAACGTAATATTGG          | miRNA | miR-16      |
| t0004565 | 20 | 71 CATAAAGTAGAAAGCACTAA         | miRNA | miR-142-5p  |
| t0004549 | 22 | 71 ATAAAGTAGAAAGCACTACTAA       | miRNA | miR-142-5p  |
| t0004590 | 20 | 71 GTAGTGTTCCTACTTTATG          | miRNA | miR-142-3p  |
| t0004596 | 20 | 71 CCTATAAAGTAGAAAGCACT         | miRNA | miR-142     |
| t0004598 | 23 | 71 CACCACAGGGTAGAACCACGGAC      | miRNA | miR-140     |
| t0004567 | 23 | 71 TGAGGTAGTAGTTTGCCTGTTT       | miRNA | let-7i      |
| t0004573 | 22 | 71 TGAGCTAGTAGTTTGTACAGTT       | miRNA | let-7g      |
| t0004594 | 21 | 71 TGAGGTAGTAGAGCGTATAGT        | miRNA | let-7f      |
| t0004599 | 21 | 71 TAGGTAGTAGTTGTGTGGTT         | miRNA | let-7b      |
| t0004569 | 22 | 71 TGAGGTAGTAGGATGTATAGTT       | miRNA | let-7       |
| t0004574 | 23 | 70 TATTCATTTATCCCCTCCCTACA      | miRNA | miR-664     |
| t0004566 | 20 | 70 TAGCAGCGGGAACAGTTCTA         | miRNA | miR-503     |
| t0004578 | 24 | 70 AAACCGTTACCACTACTGAGTTAA     | miRNA | miR-451     |
| t0004558 | 19 | 70 AAATTGTTACCACTACTGA          | miRNA | miR-451     |
| t0004562 | 25 | 70 AAACCGTTACCACTACTGAGTTAA     | miRNA | miR-451     |
| t0004597 | 22 | 70 GATGAGGATGGATAGCAAGGAA       | miRNA | miR-3605-5p |
| t0004580 | 22 | 70 AAAAGCTGGGTTGAGATGGCGT       | miRNA | miR-320d    |
| t0004583 | 22 | 70 CATTGCACTTGTCTTGGTCTGA       | miRNA | miR-25      |
| t0004545 | 19 | 70 ACCTGGCATAACAATGTAGA         | miRNA | miR-221*    |
| t0004577 | 25 | 70 CTGACCTATGAATTGACAGCCAGTG    | miRNA | miR-192     |
| t0004610 | 20 | 70 TGGAGAGAAAGGCAGTTCCA         | miRNA | miR-185     |
| t0004581 | 21 | 70 TGGAGAGAAAGACAGTTCCTG        | miRNA | miR-185     |
| t0004605 | 23 | 70 TTTGGCAATGGTAGAACTCACAC      | miRNA | miR-182     |
| t0004657 | 21 | 70 ATAGCAGCACATCATGTTTA         | miRNA | miR-15b     |

|          |    |                              |       |             |
|----------|----|------------------------------|-------|-------------|
| t0004624 | 23 | 70 ACCACAGGGTAGAACCACGGCCA   | miRNA | miR-140     |
| t0004621 | 22 | 70 ACCACAGGGGAGAACCACGGAA    | miRNA | miR-140     |
| t0004635 | 21 | 70 ACCACAGAGTAGAACCACGGA     | miRNA | miR-140     |
| t0004675 | 24 | 70 ACCACAGGGTAGAACCACGGACGA  | miRNA | miR-140     |
| t0004612 | 23 | 70 TGCTGGATCAGTGGTTTCGAGTCA  | miRNA | miR-1287    |
| t0004685 | 20 | 70 ATCCCACCGCTGCCACCATT      | miRNA | miR-1260b   |
| t0004613 | 21 | 70 CTTCCCCACCTCTCCTGCAG      | miRNA | miR-1224-3p |
| t0004627 | 21 | 70 TGAGGTAGTAGTTTGTACATT     | miRNA | let-7g      |
| t0004680 | 19 | 70 TGAGGTAGTAGATTGTATG       | miRNA | let-7f      |
| t0004647 | 21 | 70 GGAGGTAGTAGATTGTATAGT     | miRNA | let-7f      |
| t0004688 | 22 | 70 TAGGTAGTAGGTTGTGTGGTTA    | miRNA | let-7b      |
| t0004668 | 22 | 70 TCAGGTAGTAGGTTGTGTGGTT    | miRNA | let-7b      |
| t0004658 | 22 | 69 TATTGCACTTGTCCCGCCTAT     | miRNA | miR-92a     |
| t0004619 | 18 | 69 TATTGCACTTGTCCCGGC        | miRNA | miR-92a     |
| t0004636 | 21 | 69 TCCTGTACTGAGCTTCCCCGA     | miRNA | miR-486-5p  |
| t0004642 | 23 | 69 TCCTGTACTGAGCTGCCAGAGA    | miRNA | miR-486-5p  |
| t0004689 | 20 | 69 TGGGAAGAGGAGCTGAGGGA      | miRNA | miR-4646-5p |
| t0004643 | 23 | 69 AAACCGTTACCGTTACTGAGTTT   | miRNA | miR-451     |
| t0004670 | 21 | 69 TGAGGGGCAGGGAGCGAGACT     | miRNA | miR-423-5p  |
| t0004676 | 22 | 69 TGAGGGGTAGAGAGCGAGACTT    | miRNA | miR-423-5p  |
| t0004653 | 23 | 69 AACTTTGAAGGCCGAAGTGGAGA   | miRNA | miR-3526    |
| t0004666 | 22 | 69 TTCAAGTAATCCAGGATAGCCT    | miRNA | miR-26a     |
| t0004686 | 23 | 69 ACAACGGAATCCCAAAGCAGCT    | miRNA | miR-191     |
| t0004622 | 23 | 69 TGGAGAGAAAGGCAGTTCCTGCG   | miRNA | miR-185     |
| t0004633 | 22 | 69 ACATTCAACGCTGTCCGGTGTGAGT | miRNA | miR-181a    |
| t0004759 | 20 | 69 CCAATATTACTGTGCTGCTT      | miRNA | miR-16-2*   |
| t0004767 | 20 | 69 TAGCAGCACATCATCGTTTA      | miRNA | miR-15b     |
| t0004698 | 23 | 69 CCCATAAAGTAGAAAGCACTAGA   | miRNA | miR-142     |
| t0004701 | 21 | 69 ACCACAGGGTAGAACCCTGA      | miRNA | miR-140     |
| t0004743 | 24 | 69 TACCACAGGGTACAACCACGGACG  | miRNA | miR-140     |
| t0004695 | 22 | 69 AGCAGCGTTGTACAGGGCTATG    | miRNA | miR-103a    |
| t0004717 | 20 | 69 TACATTACTGTGATAACTGA      | miRNA | miR-101     |
| t0004752 | 23 | 69 TGGAATGTAAGGAAGTGTGTATC   | miRNA | miR-1       |
| t0004714 | 23 | 69 TGAGGTAGTAGATTGCATAGTTA   | miRNA | let-7f      |
| t0004713 | 23 | 68 CAAAGTGCTTTTCGTGCAGGTAG   | miRNA | miR-93      |
| t0004697 | 22 | 68 TATTGCATTTGTCCCGTCTGT     | miRNA | miR-92a     |
| t0004721 | 22 | 68 TATTGCACTTGTCCCGGTTGT     | miRNA | miR-92a     |
| t0004763 | 19 | 68 AAGACTGAAGTGGAGAAGG       | miRNA | miR-739     |
| t0004762 | 21 | 68 AATGGCGCCACTAGGGTTGTG     | miRNA | miR-652     |
| t0004757 | 23 | 68 TGTAGAGCAGGGAGCAGGAAGCG   | miRNA | miR-4732-5p |
| t0004772 | 21 | 68 AAATCGTTACCATTACTGAGT     | miRNA | miR-451     |
| t0004707 | 23 | 68 TTAGGGGCAGAGAGCGAGACTTT   | miRNA | miR-423-5p  |
| t0004742 | 21 | 68 ATTGCACGGTATCCATCTGTA     | miRNA | miR-363     |
| t0004709 | 22 | 68 TATTGCACATTACTAAGTTGCA    | miRNA | miR-32      |
| t0004724 | 19 | 68 GTTGGGACAAGAGGACGGT       | miRNA | miR-3122    |
| t0004761 | 23 | 68 CGGGGCAGCTCAGTACAGGAAGA   | miRNA | miR-3107*   |
| t0004719 | 23 | 68 TAGCACCATCTGAAATCGTTAA    | miRNA | miR-29c     |
| t0004799 | 25 | 68 AATGGCACTGGAAGAATTCACGATC | miRNA | miR-263a-5p |
| t0004779 | 21 | 68 CATTGCACTTGTCTTGGTCTG     | miRNA | miR-25      |
| t0004847 | 21 | 68 TGGGTCTTTGCGGGCGAGATG     | miRNA | miR-193a-5p |
| t0004838 | 23 | 68 TGGACGGAGAACTGATAAGGGCA   | miRNA | miR-184-3p  |
| t0004788 | 22 | 68 TAGCAGCACATAATGGTTTGGG    | miRNA | miR-15a     |
| t0004808 | 22 | 68 GATGAAGCACTGTAGCTCTATC    | miRNA | miR-143     |
| t0004804 | 23 | 68 TACCACAGGGTAGAACCACAGAC   | miRNA | miR-140     |
| t0004802 | 24 | 68 TGGAATGTAAGAAGTATGTAATC   | miRNA | miR-1-3p    |
| t0004820 | 22 | 68 TTACAGTACTGTGATAACTGAA    | miRNA | miR-101     |
| t0004826 | 25 | 68 ATCCTGTAGATCCGAATTTGTGATC | miRNA | miR-10      |
| t0004781 | 23 | 68 TGAGGTGGTAGTTTGTGCTGTTA   | miRNA | let-7i      |

|          |    |                               |       |              |
|----------|----|-------------------------------|-------|--------------|
| t0004794 | 22 | 68 TGAGGTAGTAGTTTGTACCGTT     | miRNA | let-7g       |
| t0004809 | 21 | 68 TGAGGTAGTAGATTGTATTTT      | miRNA | let-7f-5p    |
| t0004786 | 20 | 68 TCAGGTAGTAGATTGTATAG       | miRNA | let-7f       |
| t0004821 | 22 | 68 TGAGGTATTAGGTTGTGTGGTA     | miRNA | let-7b       |
| t0004818 | 21 | 68 TGAGGTAGTAGGTTTGTGGTT      | miRNA | let-7a       |
| t0004848 | 21 | 68 TGAGGTAGTAGGTCGTATAGT      | miRNA | let-7        |
| t0004813 | 21 | 68 TGAGGTAGTAGGTTGTATCGT      | miRNA | let-7        |
| t0004834 | 23 | 67 TATTGCACTCGTCCCGGCCAAGA    | miRNA | miR-92       |
| t0004793 | 22 | 67 TCCTGTA CT CAGCTGCCCCGAG   | miRNA | miR-486-5p   |
| t0004777 | 21 | 67 TCCTGTA CT GAGCTGTTCCGA    | miRNA | miR-486-5p   |
| t0004861 | 21 | 67 AAACCGTTACCATTACTGTGT      | miRNA | miR-451      |
| t0004792 | 22 | 67 AAACCGTTACCGTTACTTAGTT     | miRNA | miR-451      |
| t0004822 | 23 | 67 AAACCGTTAACATTACTGAGTTT    | miRNA | miR-451      |
| t0004796 | 21 | 67 AAAACGTTACCATTACTGAGT      | miRNA | miR-451      |
| t0004844 | 22 | 67 ACTCCACTGCTTCACTTGACT      | miRNA | miR-4301     |
| t0004806 | 20 | 67 AATTGCACGGTATCCATCTT       | miRNA | miR-363      |
| t0004837 | 26 | 67 TGAAGACTGAAGTGGAGAAGGCTCCA | miRNA | miR-3526     |
| t0004833 | 22 | 67 AAAAGCTGAGTTGAGAGGGCGA     | miRNA | miR-320a     |
| t0004778 | 21 | 67 ATATTGCACATTACTAAGTTG      | miRNA | miR-32       |
| t0004840 | 23 | 67 TTCAAGTAATTCAGGATAGGTTA    | miRNA | miR-26b      |
| t0004869 | 22 | 67 CATTGCTCTTGTCTCGGTCTGA     | miRNA | miR-25       |
| t0004895 | 24 | 67 TGA CT GGGCGGTACATCTGTTAT  | miRNA | miR-219-2-3p |
| t0004902 | 25 | 67 TAAAGTGCTTATAGTGCAGGTAGAA  | miRNA | miR-20       |
| t0004878 | 22 | 67 CAAAGTGCTTACAGTGCAGCTA     | miRNA | miR-17       |
| t0004894 | 25 | 67 ATAGCAGCACGTA AATATTGGCGAA | miRNA | miR-16       |
| t0004899 | 21 | 67 TCCAGCACGTA AATATTGGCG     | miRNA | miR-16       |
| t0004920 | 21 | 67 TAGCAGCACGTA AATATTGTC     | miRNA | miR-16       |
| t0004932 | 22 | 67 TATAGCAGCACATAATGGTTTG     | miRNA | miR-15a      |
| t0004876 | 22 | 67 TAGCAGCACATAATGGTTTCTG     | miRNA | miR-15a      |
| t0004956 | 19 | 67 CACAGGGTAGAACCACGGA        | miRNA | miR-140      |
| t0004914 | 21 | 67 ACCGCAGGGTAGAACCACGGA      | miRNA | miR-140      |
| t0004862 | 24 | 67 TAAAGTGCTGACAGTGCAGATAGT   | miRNA | miR-106b     |
| t0004943 | 25 | 67 AAGCAGCATTGTACAGGGCTATGAA  | miRNA | miR-103a     |
| t0004867 | 22 | 67 TGAGGTATTAGTTTGTACAGTT     | miRNA | let-7g       |
| t0004964 | 22 | 67 TGAGGTAGTAGCTTGTACAGTT     | miRNA | let-7g       |
| t0004903 | 23 | 67 AGAGGTAGTAGGTTGCATAGTCA    | miRNA | let-7d       |
| t0004951 | 24 | 67 CTGAGGTAGTAGGTTGTGTGGTTA   | miRNA | let-7b       |
| t0004874 | 22 | 67 TGAGGTATTAGGTTGTATAGTT     | miRNA | let-7        |
| t0004879 | 21 | 66 TTATGGTTTGCCTGGGACTGT      | miRNA | miR-584      |
| t0004906 | 21 | 66 TCCTGTA CT GAGCTGCCGAGA    | miRNA | miR-486-5p   |
| t0004917 | 23 | 66 TGAGGGGCTGAGAGCGAGACTTT    | miRNA | miR-423-5p   |
| t0004959 | 23 | 66 ACTTGACCTGGAGTCAGAAGGCA    | miRNA | miR-378      |
| t0004923 | 21 | 66 TAGCATTATCTGAAATCGGTT      | miRNA | miR-29e      |
| t0004957 | 22 | 66 TCAAGTAATTCAGGATAGGTTG     | miRNA | miR-26b      |
| t0004868 | 24 | 66 CAAAGTGCTCATAGTGCAGGTAGA   | miRNA | miR-20b      |
| t0004904 | 24 | 66 TGACCTATGAATTGACAGCCAGTT   | miRNA | miR-192      |
| t0004939 | 20 | 66 TGGAGAAAGGCAGTTCCTGA       | miRNA | miR-185      |
| t0004941 | 22 | 66 TGGACGGAGAACTGATAAGATC     | miRNA | miR-184-3p   |
| t0004924 | 20 | 66 AACCACTGACCGTTGACTGT       | miRNA | miR-181a-2*  |
| t0004919 | 22 | 66 TAGCAGCACGTA AATATTGGAA    | miRNA | miR-16b      |
| t0004916 | 23 | 66 TAGCAGCACGTA AATATTGGCCA   | miRNA | miR-16b      |
| t0005011 | 20 | 66 TACCAGCACGTA AATATTGG      | miRNA | miR-16       |
| t0005006 | 22 | 66 TAGCAGCACATAATGGTTTGT      | miRNA | miR-15a      |
| t0005055 | 22 | 66 TACCACAGGCTAGAACCACGGA     | miRNA | miR-140      |
| t0005008 | 22 | 66 TACCACGGGTAGAACCACGGA      | miRNA | miR-140      |
| t0004974 | 24 | 66 AAAAGTGCTTACAGTGCAGGTAGA   | miRNA | miR-106      |
| t0004975 | 23 | 66 AGCAGCATTGTACAGGCCTATGA    | miRNA | miR-103a     |
| t0005040 | 24 | 66 AGCAGCATTGTACAGGGCTATGGT   | miRNA | miR-103a     |

|          |    |                                 |       |            |
|----------|----|---------------------------------|-------|------------|
| t0005057 | 18 | 66 TGAGGTAGTAGATTGTTT           | miRNA | let-7f     |
| t0004970 | 20 | 66 AGAGAGTAGGTTGCATAGTT         | miRNA | let-7d     |
| t0005038 | 28 | 66 TGAGGTAGTAGGTTGTGTGGTTTTTATC | miRNA | let-7b     |
| t0005007 | 25 | 66 TATGAGGTAGTAGGTTGTGTGGTTA    | miRNA | let-7b     |
| t0005012 | 22 | 66 TGAGGTAGTAGGTTGTATAGAA       | miRNA | let-7-5p   |
| t0005052 | 24 | 66 TGAGGTAGTAGGTTGTATAGTTGA     | miRNA | let-7      |
| t0004982 | 24 | 65 TATTGCACTTGTCCCGGCCTGTAG     | miRNA | miR-92a    |
| t0004983 | 21 | 65 TATTGCACTTGTCCCGGCCTG        | miRNA | miR-92a    |
| t0004981 | 18 | 65 TTGTACTIONGAGCTGCCCCG        | miRNA | miR-486-5p |
| t0004997 | 21 | 65 AAACCATTACCATTACTGAGT        | miRNA | miR-451    |
| t0005002 | 23 | 65 AAAGCTGGGTTGAGAGGGCGTTA      | miRNA | miR-320d   |
| t0005009 | 22 | 65 AAAAGCTGGGTTGAGAGTGCGA       | miRNA | miR-320a   |
| t0005010 | 22 | 65 TGACTAGATATACTCATCCA         | miRNA | miR-279    |
| t0005046 | 19 | 65 TGAGGTAGTTGTGTGGTA           | miRNA | miR-1961   |
| t0004988 | 23 | 65 TTGAGAGAAAGGCAGTTCCTGAA      | miRNA | miR-185    |
| t0005024 | 20 | 65 CAAAGTGCTTACAGTGCAGG         | miRNA | miR-17     |
| t0005045 | 20 | 65 TAGCAGCACATCATGGTTAC         | miRNA | miR-15b    |
| t0005042 | 18 | 65 AGCAGCACATCATGGTTT           | miRNA | miR-15b    |
| t0005015 | 24 | 65 AAAGCAGCATTGTACAGGGCTATT     | miRNA | miR-107    |
| t0005072 | 20 | 65 AAAAGTGCTTACAGTGCAGG         | miRNA | miR-106    |
| t0005108 | 20 | 65 AGCAGCATTGTACACGGCTA         | miRNA | miR-103a   |
| t0005116 | 22 | 65 AGCAGCATTGTACAGGTCTATG       | miRNA | miR-103a   |
| t0005070 | 22 | 65 TACAGTACTGTTATAACTGAAG       | miRNA | miR-101    |
| t0005112 | 21 | 65 TGAGGTAGTAGATTGTAGTTT        | miRNA | let-7f-5p  |
| t0005081 | 20 | 65 TGAGGTAGTAGATTCTATAG         | miRNA | let-7f     |
| t0005061 | 21 | 65 TGAGGTAGTAGGTTGTATAGG        | miRNA | let-7      |
| t0005103 | 22 | 65 TGAGGTAGAAGGTTGTATAGTT       | miRNA | let-7      |
| t0005121 | 20 | 65 TGAGGCAGTAGGTTGTATAG         | miRNA | let-7      |
| t0005115 | 20 | 64 TATTGCACTCGTCCCGGCAT         | miRNA | miR-92     |
| t0005059 | 23 | 64 AAGGGATTCTGATGTTGGTCATC      | miRNA | miR-541    |
| t0005137 | 22 | 64 AAACCGTTACCATTACTGAGAT       | miRNA | miR-451    |
| t0005102 | 22 | 64 AAACCGTTACAATTACTGAGTT       | miRNA | miR-451    |
| t0005114 | 20 | 64 AAACCGTTACCGTTACTGAG         | miRNA | miR-451    |
| t0005078 | 25 | 64 AACCGTTACCATTACTGAGTTTAGT    | miRNA | miR-451    |
| t0005101 | 20 | 64 AAACCGTTACTATTACTGAG         | miRNA | miR-451    |
| t0005141 | 22 | 64 CTTATCAGATTGTATTGTAATT       | miRNA | miR-374a*  |
| t0005092 | 23 | 64 AAAAGCTGTGTTGAGAGGGCGTT      | miRNA | miR-320d   |
| t0005099 | 22 | 64 AAAAGCTGGGTTGAGCGGGCGA       | miRNA | miR-320a   |
| t0005068 | 22 | 64 TGTA AACATCTCCGACTGGAAG      | miRNA | miR-30d    |
| t0005120 | 23 | 64 ATCACATTGCCAGGGATTTCCAT      | miRNA | miR-23a    |
| t0005125 | 20 | 64 ACCTGGCATAACAATGTAGAT        | miRNA | miR-221*   |
| t0005182 | 26 | 64 TAAAGTGCTTATAGTGCAGGTAGATC   | miRNA | miR-20     |
| t0005245 | 23 | 64 TGTGCAAATCCATGCAAAACTGC      | miRNA | miR-19b    |
| t0005150 | 23 | 64 TGGAGAGAAAGGCAGTTCCTCAA      | miRNA | miR-185    |
| t0005167 | 21 | 64 TGGAGAGAAAGGCTGTTCTCTG       | miRNA | miR-185    |
| t0005192 | 21 | 64 TGGACGGAGA ACTGATAAGGG       | miRNA | miR-184    |
| t0005221 | 19 | 64 AAAGGTAGATAGAACAGGT          | miRNA | miR-1839   |
| t0005240 | 23 | 64 TGAGGGAGTAGATTGTATAGTTA      | miRNA | miR-1827   |
| t0005249 | 26 | 64 GAGTTAGCAGCACATAATGGTTTGTG   | miRNA | miR-15a    |
| t0005193 | 19 | 64 TCAGTGCACTACAGA ACTT         | miRNA | miR-148a   |
| t0005235 | 21 | 64 GCCACAGGGTAGAACCACGGA        | miRNA | miR-140    |
| t0005171 | 21 | 64 AACACAGGGTAGAACCACGG         | miRNA | miR-140    |
| t0005208 | 24 | 64 TACCACAGGGTAGAACCACGGTCA     | miRNA | miR-140    |
| t0005190 | 22 | 64 TACCTCAGGGTAGAACCACGGA       | miRNA | miR-140    |
| t0005212 | 23 | 64 TACCACATGGTAGAACCACGGAA      | miRNA | miR-140    |
| t0005196 | 24 | 64 AAGCAGCATTGTACAGGGCTATAA     | miRNA | miR-107    |
| t0005174 | 21 | 64 AAAAGTGCTTACATTGCAGGT        | miRNA | miR-106    |
| t0005216 | 22 | 64 AGCAGCATTGTACAGGGATATG       | miRNA | miR-103a   |

|          |    |                                 |       |             |
|----------|----|---------------------------------|-------|-------------|
| t0005219 | 22 | 64 TGAGGTAGTACGTTGTGTGGTA       | miRNA | let-7b      |
| t0005243 | 25 | 64 TGAGGTAGTATGTTGTTGGTTATC     | miRNA | let-7b      |
| t0005187 | 21 | 64 TGAGGTAATAGGTTGTATAGT        | miRNA | let-7       |
| t0005179 | 20 | 63 AGAAGCATTGTACAGGGCTA         | miRNA | miR-4289    |
| t0005201 | 22 | 63 AAGCTCGGTCTGAGGCCCTCA        | miRNA | miR-423-3p  |
| t0005146 | 19 | 63 AGGTAGTAGTTTGTACAGT          | miRNA | miR-3962    |
| t0005156 | 23 | 63 AAAGGCTGGGTTGAGAGGGCGGA      | miRNA | miR-320d    |
| t0005169 | 21 | 63 AAAGCTGGTTTGTAGAGGGCGA       | miRNA | miR-320a    |
| t0005251 | 22 | 63 CTTTCAGTCGGATGTTTACAGT       | miRNA | miR-30b-3p  |
| t0005252 | 24 | 63 CAGTGCAATAGTATTGTCAAAGCA     | miRNA | miR-301b-3p |
| t0005149 | 19 | 63 AAGTAATTCAGGATAGGTT          | miRNA | miR-26b     |
| t0005191 | 25 | 63 CAACGGAATCCCAAAGCAGCTGTG     | miRNA | miR-191     |
| t0005152 | 19 | 63 TGAGGGAGTAGATTGTATA          | miRNA | miR-1827    |
| t0005180 | 22 | 63 TAGCAGCGCATAAATATTGGCG       | miRNA | miR-16      |
| t0005237 | 23 | 63 TAGCAGCACATAATGGTTTAAA       | miRNA | miR-15a     |
| t0005233 | 20 | 63 TAGCAGCACTTAATGGTTTG         | miRNA | miR-15a     |
| t0005303 | 22 | 63 TGAGAACTGAATCCATAGGCT        | miRNA | miR-146b    |
| t0005305 | 24 | 63 TACCACAGGGTAGAATCACGGACG     | miRNA | miR-140     |
| t0005318 | 21 | 63 AGCAGCATTCTACAGGGCTAT        | miRNA | miR-103a    |
| t0005294 | 23 | 63 AGCAGCATTGTATAGGGCTATGA      | miRNA | miR-103a    |
| t0005324 | 22 | 63 GTACAGTACTGTGATAACTGCA       | miRNA | miR-101     |
| t0005259 | 21 | 63 TGAGTTAGTAGTTTGTACAGT        | miRNA | let-7g      |
| t0005302 | 20 | 63 TGAGGTAGTAAATTGTATAG         | miRNA | let-7f      |
| t0005287 | 22 | 63 AGAGGTAGTAGATTGCATAGTT       | miRNA | let-7d      |
| t0005255 | 21 | 63 CTATACAACCTACTGCCTTCC        | miRNA | let-7b*     |
| t0005282 | 21 | 63 TGAGGTAGTATGTTGTATAGT        | miRNA | let-7       |
| t0005270 | 21 | 63 TGAGGTAGAAGGTTGTATAGT        | miRNA | let-7       |
| t0005279 | 22 | 62 TCTGGGCACAGGCGGATGGACC       | miRNA | miR-5107    |
| t0005300 | 20 | 62 GGAGAAGGGTTCGGGGCGGCT        | miRNA | miR-4516    |
| t0005337 | 21 | 62 AAACCGTTACCATTACTGAAT        | miRNA | miR-451     |
| t0005262 | 22 | 62 CAGCAGCAATTCATGTTTTGAA       | miRNA | miR-424     |
| t0005334 | 21 | 62 TGAGGCGCAGAGAGCGAGACT        | miRNA | miR-423-5p  |
| t0005338 | 21 | 62 TTAGGGGCAGAGAGCGAGACT        | miRNA | miR-423-5p  |
| t0005265 | 23 | 62 GAAAAGCTGGGTTGAGAGGGCGT      | miRNA | miR-320d    |
| t0005332 | 23 | 62 AAAAGCTGGGTTGAGAGGGTGAA      | miRNA | miR-320d    |
| t0005264 | 23 | 62 AAAAGCTGGGTTGAGAGGGCGTC      | miRNA | miR-320d    |
| t0005309 | 22 | 62 AAGCTGGGTTGAGAGGGCGAAA       | miRNA | miR-320a    |
| t0005335 | 22 | 62 TCTGGGAGTTTGTAGCAGTGGA       | miRNA | miR-3192    |
| t0005267 | 18 | 62 CTTTCAGTCGGATGTTTA           | miRNA | miR-30e*    |
| t0005295 | 23 | 62 GTAAACATCCTTGACTGGAAGCT      | miRNA | miR-30e     |
| t0005377 | 22 | 62 TTCAAGTAATCTAGGATAGGCT       | miRNA | miR-26a     |
| t0005344 | 26 | 62 TAGCTTACCAGACTGATGTTGACATC   | miRNA | miR-21      |
| t0005382 | 18 | 62 TGGAGAGAAAGGCAGTTT           | miRNA | miR-185     |
| t0005355 | 24 | 62 TAGCAGCACATAATGGTTTGTGAA     | miRNA | miR-15a     |
| t0005392 | 21 | 62 ACCACAGGGTAGAACCACGGA        | miRNA | miR-140     |
| t0005423 | 21 | 62 ACCACAGGGTAGAACCACGGG        | miRNA | miR-140     |
| t0005353 | 23 | 62 TACCACAGGGTAGAACCACGGTT      | miRNA | miR-140     |
| t0005449 | 22 | 62 CAGTGCAATGTTAAAAGGGCAA       | miRNA | miR-130a    |
| t0005451 | 26 | 62 CTCGTACCGTGAGTAATAATGCGATC   | miRNA | miR-126     |
| t0005436 | 22 | 62 AGTAGCATTGTACAGGGCTATG       | miRNA | miR-103a    |
| t0005359 | 28 | 62 TACAGTACTGTGATAACTGAACCAAGCA | miRNA | miR-101     |
| t0005389 | 22 | 62 GTACAGTATTGTGATAACTGAA       | miRNA | miR-101     |
| t0005409 | 23 | 62 TGAGGTAGTAGTTTGTGCTGTAT      | miRNA | let-7i      |
| t0005446 | 24 | 62 TGAGGTAGTAGATTGTATAGTTAT     | miRNA | let-7f      |
| t0005354 | 23 | 62 TGAGGTAGTAGATTGTATAGTAG      | miRNA | let-7f      |
| t0005399 | 21 | 62 TTAGGTAGTAGATTGTATTGT        | miRNA | let-7f      |
| t0005459 | 20 | 62 TGAGGTAGTCGATTGTATAG         | miRNA | let-7f      |
| t0005360 | 23 | 62 TGAGGCAGTAGATTGTATAGTTG      | miRNA | let-7f      |



|          |    |                                 |       |             |
|----------|----|---------------------------------|-------|-------------|
| t0005388 | 21 | 62 TGAGGTAGTAGGTTGTGTGGC        | miRNA | let-7b      |
| t0005450 | 23 | 62 TGAGGTACTAGGTTGTGTGGTTA      | miRNA | let-7b      |
| t0005396 | 23 | 62 TGAGGTAGTAGGTTGTGTGTTAA      | miRNA | let-7b      |
| t0005378 | 22 | 62 TGAGGTACTAGGTTGTATAGTT       | miRNA | let-7       |
| t0005415 | 22 | 61 CAAAGTGCTGTTCTGTCAGGTG       | miRNA | miR-93      |
| t0005408 | 22 | 61 TATTGCACTTGTCCCGGCCTTT       | miRNA | miR-92b     |
| t0005438 | 22 | 61 TCTCCACACCCAAGGCTTGCA        | miRNA | miR-532-3p  |
| t0005420 | 25 | 61 TCCTGTAAGTACTGAGCTGCCCGAGAGA | miRNA | miR-486-5p  |
| t0005356 | 21 | 61 AACCGTTACCATTATTGAGTT        | miRNA | miR-451     |
| t0005366 | 21 | 61 AAACCGTTACCTTTACTGAGT        | miRNA | miR-451     |
| t0005370 | 22 | 61 AAAACGTTACCATTACTGAGTT       | miRNA | miR-451     |
| t0005373 | 22 | 61 AAACCGTTACCCTTACTGAGTT       | miRNA | miR-451     |
| t0005462 | 21 | 61 AAACCGTTATTATTACTGAGT        | miRNA | miR-451     |
| t0005425 | 27 | 61 AAACCGTTACCATTACTGAGTCGTCGG  | miRNA | miR-451     |
| t0005443 | 22 | 61 AAACCGTTACCATTAGTGAGTT       | miRNA | miR-451     |
| t0005456 | 22 | 61 CGAGGGGCAGAGAGCGAGACTT       | miRNA | miR-423-5p  |
| t0005432 | 19 | 61 AATTGCACGGTATCCATTG          | miRNA | miR-363     |
| t0005575 | 23 | 61 AAAAGCTGGTTTGAGAGGGCGTA      | miRNA | miR-320d    |
| t0005564 | 25 | 61 TCTAAAAGCTGGGTTGAGAGGGCGT    | miRNA | miR-320d    |
| t0005517 | 23 | 61 AAAAGTTGGGTTGAGAGGGCGTA      | miRNA | miR-320d    |
| t0005585 | 19 | 61 CACCTTGCGCTACTCAGGT          | miRNA | miR-3200-3p |
| t0005466 | 18 | 61 TGAGGTAGTGTGTGTGGT           | miRNA | miR-1961    |
| t0005467 | 25 | 61 GAGTAGCAGCACGTAATATTGGCG     | miRNA | miR-16      |
| t0005480 | 25 | 61 TGCAGTGCTTCTACTTTATGGATC     | miRNA | miR-142-3p  |
| t0005494 | 25 | 61 TACCACAGGGTAGAACCACGGAAAA    | miRNA | miR-140     |
| t0005526 | 23 | 61 TACCATAGGGTAGAATCACGGAC      | miRNA | miR-140     |
| t0005532 | 23 | 61 ACCACAGGGTAGAACCACGGAGT      | miRNA | miR-140     |
| t0005555 | 21 | 61 TGGAGTGTGACAATGGTGTTT        | miRNA | miR-122     |
| t0005495 | 23 | 61 AAAAGTGCTTACAGTGCAGGTAT      | miRNA | miR-106     |
| t0005496 | 23 | 61 TGAGGTAGTAGTTTGTGCTGCTT      | miRNA | let-7i      |
| t0005478 | 22 | 61 TGAGGTAGTAGTTTGTGCTGTG       | miRNA | let-7i      |
| t0005481 | 21 | 60 GTAGAGGAGATGGCGCAGGGG        | miRNA | miR-877     |
| t0005483 | 21 | 60 TGCGGGGCTAGGGCTAACAGC        | miRNA | miR-744     |
| t0005513 | 29 | 60 CTGGTGCGGACCAGGGGAATCCGACTGT | miRNA | miR-5109    |
| t0005563 | 22 | 60 TCCTGTAAGTACTGAGCTGCTGCGAG   | miRNA | miR-486-5p  |
| t0005541 | 21 | 60 CCTGTAAGTACTGAGCTGCCCGAG     | miRNA | miR-486-5p  |
| t0005551 | 22 | 60 TCCTGTAAGTACTGAGCAGCCCGAG    | miRNA | miR-486-5p  |
| t0005497 | 23 | 60 TGAGGGGCAGAGAGCGAACTTT       | miRNA | miR-423-5p  |
| t0005546 | 22 | 60 TAAGGGGCAGAGAGCGAGACTT       | miRNA | miR-423-5p  |
| t0005580 | 21 | 60 TGAGGGGCAGCGAGCGAGACT        | miRNA | miR-423-5p  |
| t0005535 | 23 | 60 AAAAGCTAGGTTGAGAGGGCGTA      | miRNA | miR-320d    |
| t0005465 | 21 | 60 AAAAGCTGGGTTGAGAGGGAG        | miRNA | miR-320d    |
| t0005473 | 23 | 60 CACCTTGCGCTACTCAGGTTTGA      | miRNA | miR-3200-3p |
| t0005550 | 24 | 60 TAGCTTATCAGACTGATGTTGATT     | miRNA | miR-21      |
| t0005608 | 21 | 60 TGGAGAGAAAGGCACTTCCTG        | miRNA | miR-185     |
| t0005611 | 24 | 60 CAAAGTGCTTACAGTGCAGGTAGT     | miRNA | miR-17      |
| t0005586 | 23 | 60 TACAACAGGGTAGAACCACGGAC      | miRNA | miR-140     |
| t0005613 | 23 | 60 ACCACAGGGTAGAACTACGGACA      | miRNA | miR-140     |
| t0005647 | 22 | 60 ACCACAGGGTAGAAACACGGAC       | miRNA | miR-140     |
| t0005699 | 21 | 60 ACCACACGGTAGAACCACGGA        | miRNA | miR-140     |
| t0005638 | 19 | 60 ACCAGGGTAGAACCACGGA          | miRNA | miR-140     |
| t0005643 | 24 | 60 TAAAGTGCTGACAGTGCAGATAGA     | miRNA | miR-106b    |
| t0005696 | 19 | 60 AGCAGCATTGTACAGGGCA          | miRNA | miR-103a    |
| t0005595 | 20 | 60 AGCAGCATTGTCAGGGCTA          | miRNA | miR-103a    |
| t0005666 | 23 | 60 TGAGGTAGTAGGTTGTGTGGACA      | miRNA | let-7b      |
| t0005686 | 21 | 60 TGAGGTAGTAGGTTGTGTGAT        | miRNA | let-7b      |
| t0005668 | 21 | 60 TGAGCTAGTAGGTTGTATAGT        | miRNA | let-7       |
| t0005627 | 20 | 60 TGAGGTAGTAGGTTGCATAG         | miRNA | let-7       |

|          |    |                                 |       |            |
|----------|----|---------------------------------|-------|------------|
| t0005654 | 22 | 60 TGTGGTAGTAGGTTGTATAGTT       | miRNA | let-7      |
| t0005588 | 21 | 59 AAAGTGCTGTTTCGTGCAGGTA       | miRNA | miR-93     |
| t0005604 | 24 | 59 GTAGAGGAGATGGCGCAGGGGACT     | miRNA | miR-877    |
| t0005612 | 21 | 59 TCCTGTACTAAGCTGCCCCGA        | miRNA | miR-486-5p |
| t0005621 | 18 | 59 CTGTACTGAGCTGCCCCG           | miRNA | miR-486-5p |
| t0005692 | 22 | 59 TCTTGTACTGAGCTCCCCCGAG       | miRNA | miR-486-5p |
| t0005597 | 23 | 59 TCCTGTACTGAGCTAGCCCGAGA      | miRNA | miR-486-5p |
| t0005646 | 23 | 59 AAACCGTTACCATTCTGAGTTT       | miRNA | miR-451    |
| t0005662 | 22 | 59 AACCTTTACCATTACTGAGTTT       | miRNA | miR-451    |
| t0005632 | 23 | 59 AAACCGTTACCATTACTGACTTT      | miRNA | miR-451    |
| t0005671 | 22 | 59 AAACCGTTACCATTCTGAGTT        | miRNA | miR-451    |
| t0005598 | 22 | 59 AATTTTGGAGGAGATGCGGTTA       | miRNA | miR-4443   |
| t0005619 | 21 | 59 AGTACAGGGCTATAGCAGCAT        | miRNA | miR-4289   |
| t0005640 | 22 | 59 CGAGGTAGTAGTTTGTACAGTT       | miRNA | miR-3962   |
| t0005782 | 21 | 59 ACTGGACTTGGAGTTAGAAGG        | miRNA | miR-378    |
| t0005752 | 22 | 59 AAAAAGTGGGTTGAGAGGGCGA       | miRNA | miR-320a   |
| t0005735 | 22 | 59 CATTGCACTTGTCTCGGTATGA       | miRNA | miR-25     |
| t0005778 | 22 | 59 CATTGCTTTTGTCTCGGTCTGA       | miRNA | miR-25     |
| t0005805 | 22 | 59 CATTGCACTTCTCTCGGTCTGA       | miRNA | miR-25     |
| t0005832 | 21 | 59 TTAGAGAAAGGCAGTTCCTGA        | miRNA | miR-185    |
| t0005759 | 23 | 59 AACATTCATTGCTGTCTCGGTGGGT    | miRNA | miR-181b   |
| t0005762 | 19 | 59 CAGCATGTAAATATTGGCG          | miRNA | miR-16c    |
| t0005763 | 26 | 59 GCTGGGGGCGGGGAGCGGTCTGGGCGG  | miRNA | miR-1607   |
| t0005796 | 25 | 59 TAGCAGCACGTAAATATTGGCGGAA    | miRNA | miR-16     |
| t0005830 | 22 | 59 TAGCAGCACATCATGGTTTAAA       | miRNA | miR-15b    |
| t0005788 | 20 | 59 TAGCAGCAAATCATGGTTTA         | miRNA | miR-15b    |
| t0005705 | 28 | 59 TAGCAGCACATCATGGTTTACACCCCAT | miRNA | miR-15b    |
| t0005727 | 23 | 59 TACCACAAGGTAGAACCACGGAA      | miRNA | miR-140    |
| t0005797 | 23 | 59 TACCACAGGGTAGAACCATGGAA      | miRNA | miR-140    |
| t0005754 | 24 | 59 ACCACAGGGTAGAACCACGGACGG     | miRNA | miR-140    |
| t0005783 | 25 | 59 TACTGTAGATCCGAATTTGTATC      | miRNA | miR-10a    |
| t0005790 | 20 | 59 AGCAGTATTGTACAGGGCTA         | miRNA | miR-103a   |
| t0005739 | 26 | 59 GTACAGTACTGTGATAACTGACGGGT   | miRNA | miR-101c   |
| t0005828 | 21 | 59 TACAGTACTGTGATAACTGAG        | miRNA | miR-101c   |
| t0005824 | 21 | 59 TACAGTACTGTGATGACTGAA        | miRNA | miR-101    |
| t0005801 | 27 | 59 TACAGTACTGTGATAACTGAAGAGGGA  | miRNA | miR-101    |
| t0005829 | 21 | 59 GGTAGTAGATTGTATAGTTGA        | miRNA | let-7f     |
| t0005731 | 22 | 59 TGAGGAGGTAGATTGTATAGTT       | miRNA | let-7f     |
| t0005766 | 22 | 59 TGAGGTAGTAGATTGTAGAGTT       | miRNA | let-7f     |
| t0005827 | 21 | 59 TGAGGTAGTAGATCGTATAGA        | miRNA | let-7f     |
| t0005702 | 23 | 59 TGAGGTAGTAGATTGTATAGATC      | miRNA | let-7f     |
| t0005722 | 20 | 59 ATAGGTAGTAGGTTGCATAG         | miRNA | let-7d     |
| t0005818 | 26 | 59 AGAGGTAGTAGGTTGCATAGTTACCG   | miRNA | let-7d     |
| t0005808 | 22 | 59 TGAGGTAGTACGTTGTATAGTT       | miRNA | let-7      |
| t0005770 | 21 | 59 TGAGGTAGTAGGTTATATAGT        | miRNA | let-7      |
| t0005726 | 20 | 58 TATACACTTACTACTTTCT          | miRNA | miR-98*    |
| t0005789 | 22 | 58 TATTGCACTTGTCCCGGCCTAA       | miRNA | miR-92     |
| t0005807 | 21 | 58 GTAGAGGAGATGGCGCAGGAA        | miRNA | miR-877    |
| t0005809 | 24 | 58 GATCTGTACTGAGCTGCCCCGAGT     | miRNA | miR-486-5p |
| t0005707 | 22 | 58 TCTTGTACTGATCTGCCCCGAG       | miRNA | miR-486-5p |
| t0005768 | 19 | 58 AAACCGTTACCGTTACTGA          | miRNA | miR-451    |
| t0005775 | 21 | 58 TGAGGGTCAGAGAGCCGAGACT       | miRNA | miR-423-5p |
| t0005815 | 22 | 58 TGAGGGGCAGAGAACGAGACTT       | miRNA | miR-423-5p |
| t0005817 | 24 | 58 CTGGACTTGGAGTCAGAAGGCTAG     | miRNA | miR-378    |
| t0005701 | 19 | 58 CCGGGGGTGGGGTCTGGCGG         | miRNA | miR-3621   |
| t0005795 | 24 | 58 CTTGAAGACTGAAGTGGAGAAGGG     | miRNA | miR-3526   |
| t0005704 | 22 | 58 AAAAGCTTGGTTGAGAGGGCGT       | miRNA | miR-320d   |
| t0005730 | 22 | 58 AAAAGTTGGGTTGAGAGGGCGT       | miRNA | miR-320d   |

|          |    |                                  |       |              |
|----------|----|----------------------------------|-------|--------------|
| t0005965 | 20 | 58 AAACCTGGGTTGAGAGGGCG          | miRNA | miR-320a     |
| t0005941 | 21 | 58 AGCTTTTGGGAATTCAGGTAG         | miRNA | miR-3140-3p  |
| t0005849 | 22 | 58 CTGGCTCAGTTCAGCAGGAACA        | miRNA | miR-24       |
| t0005862 | 23 | 58 AAGCTGCCAGTTGAAGAACTGTA       | miRNA | miR-22-3p    |
| t0005898 | 23 | 58 AGCTACATTGTCTGCTGGGTTAA       | miRNA | miR-221      |
| t0005853 | 23 | 58 TAGCAGCACGTAATATTGCCGT        | miRNA | miR-16       |
| t0005935 | 18 | 58 TAGCAGCATATCATGGTT            | miRNA | miR-15b      |
| t0005959 | 21 | 58 TATCAGCACATAATGGTTTGT         | miRNA | miR-15a      |
| t0005958 | 22 | 58 GTAGTGTTCCTACTTTATGGT         | miRNA | miR-142-3p   |
| t0005906 | 21 | 58 ACCACAGGATAGAACCACGGA         | miRNA | miR-140      |
| t0005886 | 23 | 58 TACCACAAGGTAGAACCACGGAT       | miRNA | miR-140      |
| t0005882 | 18 | 58 ACAGGGTAGAACCACGGA            | miRNA | miR-140      |
| t0005909 | 24 | 58 TCGGATCCGTCTGAGCTTGGCATC      | miRNA | miR-127      |
| t0005857 | 18 | 58 TGGAGTGTGACAATGGTG            | miRNA | miR-122      |
| t0005917 | 20 | 58 TGAGGTAGTTGATTGTATAG          | miRNA | let-7f       |
| t0005842 | 23 | 58 TGAGGTAGTAGATTGTATAGTTC       | miRNA | let-7f       |
| t0005855 | 22 | 58 AGAGGTAGTAGGCTGCATAGTT        | miRNA | let-7d       |
| t0005945 | 22 | 58 TGATGTAGTAGGTTGTATGGTT        | miRNA | let-7c       |
| t0005940 | 24 | 58 TGAGGTAGTAGGTTGTGTGGTTTG      | miRNA | let-7b       |
| t0005843 | 21 | 58 TGAGGTAGAAGTTGTGTGGT          | miRNA | let-7b       |
| t0005921 | 21 | 58 TGAGGTATTAGTTGTATAGT          | miRNA | let-7        |
| t0005904 | 23 | 57 AGTTGGGATCGGTTGCAATGCT        | miRNA | miR-92a-1*   |
| t0005863 | 28 | 57 TCCTGTACTGAGCTGCCCGAGACGGCG   | miRNA | miR-486-5p   |
| t0005880 | 23 | 57 ATCCTGTACTGAGCTGCCCGAG        | miRNA | miR-486-5p   |
| t0005949 | 21 | 57 AAACCGTTACCATTACTCAGC         | miRNA | miR-451      |
| t0005895 | 22 | 57 TGAGGGGCAGAGAGCGACACTT        | miRNA | miR-423-5p   |
| t0005971 | 22 | 57 TGAGGGCCAGAGAGCGAGACTT        | miRNA | miR-423-5p   |
| t0005883 | 23 | 57 TGAGGGGCAAAGAGCGAGACTTT       | miRNA | miR-423-5p   |
| t0005913 | 24 | 57 TGAGGGGCAGAGAGCGAGACCTTT      | miRNA | miR-423-5p   |
| t0005970 | 25 | 57 TGAGGGGCAGAGAGCGAGACTTAGA     | miRNA | miR-423-5p   |
| t0005947 | 20 | 57 CTGGACTTGGAGTCAGAAGG          | miRNA | miR-378      |
| t0005876 | 27 | 57 ACTGGACTTGGAGTCAGAAGGCTTATC   | miRNA | miR-378      |
| t0005939 | 21 | 57 TCAGAATCGTTTGCATGGCT          | miRNA | miR-3495     |
| t0005901 | 22 | 57 TTCCACACAGAAATCGCACCCG        | miRNA | miR-342-3p   |
| t0006124 | 25 | 57 AAAAAAGCTGGGTTGAGAGGGCGTA     | miRNA | miR-320d     |
| t0005998 | 22 | 57 AAAAGCTGTGTTGAGAGGGCGC        | miRNA | miR-320d     |
| t0006088 | 25 | 57 AAAAGCTGGGTTGAGAGGGCGATTT     | miRNA | miR-320a     |
| t0006073 | 23 | 57 AAAACCTGGGTTGAGAGGGCGAA       | miRNA | miR-320a     |
| t0005988 | 23 | 57 AAAAGTTGGGTTGAGAGGGCGAA       | miRNA | miR-320a     |
| t0005992 | 20 | 57 CTTTCAGTCGGATGTTTACA          | miRNA | miR-30e*     |
| t0006023 | 25 | 57 TGACTGGGGCGGTACATCTGTTAAA     | miRNA | miR-219-2-3p |
| t0006074 | 19 | 57 ACTGCATTATGAGCACTTA           | miRNA | miR-20a*     |
| t0006114 | 21 | 57 TGGACAGAAAGGCAGTTCCTG         | miRNA | miR-185      |
| t0006083 | 22 | 57 ATAGCAGCACATAATGGTTTGT        | miRNA | miR-15a      |
| t0006087 | 20 | 57 TACAGTATAGATGATGTACA          | miRNA | miR-144      |
| t0006103 | 23 | 57 CTACAGTATAGATGATGTA CTTG      | miRNA | miR-144      |
| t0006068 | 24 | 57 TACCACAGGGGAGAACCACGGACA      | miRNA | miR-140      |
| t0006070 | 25 | 57 TACCACAGGGTAGAACCACGGATAT     | miRNA | miR-140      |
| t0006115 | 22 | 57 ACCACAGGGTAGAACCAAGGAC        | miRNA | miR-140      |
| t0006062 | 22 | 57 TACCACACGGTAGAACCACGGA        | miRNA | miR-140      |
| t0006109 | 24 | 57 TCCCTGAGACCTTTAACCTGATC       | miRNA | miR-125a     |
| t0006120 | 22 | 57 AGCAGCATTGTACAGGGCTAGA        | miRNA | miR-107      |
| t0006130 | 23 | 57 AGCAGCATTGTACAGGGCCATGA       | miRNA | miR-103a     |
| t0006003 | 28 | 57 AGCAGCATTGTACAGGGCTATGACGTCTG | miRNA | miR-103a     |
| t0005986 | 23 | 57 TGAGGTAGTAGGTTGTGTGGGTT       | miRNA | let-7b       |
| t0006131 | 21 | 57 TGAGGTCGTAGGTTGTGTGGT         | miRNA | let-7b       |
| t0006108 | 24 | 57 GTTGAGGTAGTAGGTTGTGTGGTT      | miRNA | let-7b       |
| t0005982 | 23 | 57 TGAGGTAGTAGGTTGTGTAGTTG       | miRNA | let-7b       |

|          |    |                                 |       |              |
|----------|----|---------------------------------|-------|--------------|
| t0006119 | 26 | 57 TGAGGTAGTAGGTTGTGTGGTAAGAA   | miRNA | let-7b       |
| t0005999 | 20 | 57 TGAGGTAGTAGGTCGTATAG         | miRNA | let-7        |
| t0006008 | 24 | 56 TATTGCACTCGTCCCGGCCTAAGA     | miRNA | miR-92       |
| t0006026 | 23 | 56 GTAGAGGAGATGGCGCAGGGGAC      | miRNA | miR-877      |
| t0006049 | 20 | 56 TAGTACCAGTACCTTGTGTT         | miRNA | miR-624*     |
| t0006128 | 22 | 56 TAGCAGCGGGAACAGTTCTGAA       | miRNA | miR-503      |
| t0006123 | 23 | 56 TCCTGTAAGTACTGAGCTGCCCGACG   | miRNA | miR-486-5p   |
| t0006028 | 23 | 56 TCCTGTAAGTACTGAGCTGCCCGAGA   | miRNA | miR-486-5p   |
| t0006091 | 20 | 56 AAACCGTTACCATTACTGGG         | miRNA | miR-451      |
| t0006014 | 25 | 56 AATGACACGATCACTCCCGTTGAGA    | miRNA | miR-425      |
| t0006029 | 22 | 56 TGAGGGGCAGAGAGGGGAGACTT      | miRNA | miR-423-5p   |
| t0006039 | 22 | 56 AGCACTTTGGGAGGTCAGGTGA       | miRNA | miR-3622b-5p |
| t0006090 | 28 | 56 ACTTTGAAGACTGAAGTGGAGAAGGGTT | miRNA | miR-3526     |
| t0006110 | 21 | 56 AAAGCTGGGTTTAGAGGGCGT        | miRNA | miR-320d     |
| t0005991 | 26 | 56 CGCAAAGCTGGGTTGAGAGGGCGTA    | miRNA | miR-320d     |
| t0006259 | 22 | 56 AAAAGCTGCGTTGAGAGGGCGT       | miRNA | miR-320d     |
| t0006296 | 24 | 56 AAAAGCTGGGTTGAGAGGGCAAAA     | miRNA | miR-320b     |
| t0006270 | 23 | 56 AAAAGCTGGGGTGAGAGGGCGAA      | miRNA | miR-320a     |
| t0006183 | 22 | 56 AGAGCTTTTGGGAATTCAGGTA       | miRNA | miR-3140-3p  |
| t0006218 | 25 | 56 TTCAAGTAATCCAGGATAGGCTAGA    | miRNA | miR-26a      |
| t0006268 | 21 | 56 CATTGCACTTCTCTCGGTCTG        | miRNA | miR-25       |
| t0006156 | 21 | 56 CATGCACTTGTCTCGGTCTGA        | miRNA | miR-25       |
| t0006150 | 21 | 56 AGTGAGATTGTTGCATATTTA        | miRNA | miR-2162-5p  |
| t0006223 | 21 | 56 TTCTTTTTGTCATCCTTCGCC        | miRNA | miR-211      |
| t0006222 | 21 | 56 TAAGGTGCATCTAGTGCAGTT        | miRNA | miR-18b      |
| t0006144 | 21 | 56 CAAAGAATTCTCCTTTTGGGA        | miRNA | miR-186      |
| t0006175 | 23 | 56 TGGAGAGAAAGGCAGTTCCTTAA      | miRNA | miR-185      |
| t0006232 | 22 | 56 AAGGTAGATAGAACAGGTTTTG       | miRNA | miR-1839     |
| t0006271 | 20 | 56 AGCAGCACGTAAATATTGGT         | miRNA | miR-16       |
| t0006182 | 22 | 56 TCGCAGCACGTAAATATTGGCG       | miRNA | miR-16       |
| t0006286 | 19 | 56 TAGCAGCACGTAAATATGG          | miRNA | miR-16       |
| t0006300 | 28 | 56 TAGCAGCACATCATGGTTTACATGCCAC | miRNA | miR-15b      |
| t0006267 | 22 | 56 TGTCCCAACCCTTGTACCAGTG       | miRNA | miR-150      |
| t0006206 | 24 | 56 TACCACAGGGTAGAACCACGGTAA     | miRNA | miR-140      |
| t0006299 | 21 | 56 TGGGAGGCGGAGGTTGCAGTG        | miRNA | miR-1273f    |
| t0006251 | 22 | 56 AGGCATTGACTTCTCTCTAGCT       | miRNA | miR-1256     |
| t0006210 | 20 | 56 TAAAGTGCTGACAGTGCATA         | miRNA | miR-106b     |
| t0006147 | 21 | 56 AGCAGCATTGTATAGGGCTAT        | miRNA | miR-103a     |
| t0006266 | 18 | 56 GTACAGTACTGTGATAAC           | miRNA | miR-101      |
| t0006236 | 25 | 56 TGAGGTAGTAGTTTGTGCTGTTAGA    | miRNA | let-7i       |
| t0006200 | 21 | 56 TGAGGTAGTAGTTTGTGCTGA        | miRNA | let-7i       |
| t0006191 | 22 | 56 TGGGGTAGTAGTTTGTACAGTT       | miRNA | let-7g       |
| t0006214 | 21 | 56 TGAGGTAGTAGTTTTTACAGT        | miRNA | let-7g       |
| t0006301 | 25 | 56 TGAGGTAGTAGATTGTATAGTACGG    | miRNA | let-7f       |
| t0006246 | 25 | 56 TGAGGTAGTAGTTGTGTGGTGAGT     | miRNA | let-7b       |
| t0006253 | 20 | 55 GTGGAAGGTTGTAGGCATGT         | miRNA | miR-965-5p   |
| t0006199 | 22 | 55 TATTGCACTTGTCCCGGCCTGG       | miRNA | miR-92b-3p   |
| t0006167 | 20 | 55 AGGGACGGGACGCGGTGTAG         | miRNA | miR-92b*     |
| t0006174 | 23 | 55 TCCTGTAAGTACTGAGCTGCTGCGAGA  | miRNA | miR-486-5p   |
| t0006250 | 21 | 55 TCCTGTAAGTACTGAGCAGCCCCGA    | miRNA | miR-486-5p   |
| t0006273 | 21 | 55 AAACCGTTACCATTACTGAGC        | miRNA | miR-451      |
| t0006240 | 19 | 55 AGCACATTGTACAGGGCTA          | miRNA | miR-4289     |
| t0006138 | 22 | 55 TGAGGGGCAGAGAGCAAGACTT       | miRNA | miR-423-5p   |
| t0006185 | 21 | 55 AATCCTTGGAACCTAGGTGTG        | miRNA | miR-362-5p   |
| t0006148 | 22 | 55 AAAAGCTGGGTTGAGAGGGTGT       | miRNA | miR-320d     |
| t0006234 | 23 | 55 AAAAGCTGGGTTGAGAGGGTATT      | miRNA | miR-320d     |
| t0006293 | 22 | 55 AAAGCTGGGTTGAGAGGGCAAA       | miRNA | miR-320b     |
| t0006302 | 25 | 55 CCAAAAAGCTGGGTTGAGAGGGCGA    | miRNA | miR-320a     |

|          |    |                                 |       |              |
|----------|----|---------------------------------|-------|--------------|
| t0006445 | 22 | 55 AAAAGCTGGGTTTCAGAGGGCGA      | miRNA | miR-320a     |
| t0006386 | 23 | 55 CATGCTAGGATAGAAAGAATGGG      | miRNA | miR-3146     |
| t0006325 | 23 | 55 CATTGCACTTGTCTCGGTCTGAG      | miRNA | miR-25       |
| t0006391 | 21 | 55 CATTGCACTTGTCTCGGTCTT        | miRNA | miR-25       |
| t0006419 | 21 | 55 AATCACATTGCCAGGGATTTA        | miRNA | miR-23a      |
| t0006381 | 20 | 55 TTGGGGAAACGGCCGCTGAG         | miRNA | miR-2110     |
| t0006306 | 23 | 55 CTGACCTATGAATTGACAGCCAT      | miRNA | miR-192      |
| t0006362 | 22 | 55 CAACGGAATTCCAAAAGCAGCT       | miRNA | miR-191      |
| t0006356 | 24 | 55 CAACGGAATCCAAAAGCATCTGA      | miRNA | miR-191      |
| t0006341 | 27 | 55 TTTGGCAATGGTAGAACTCACACTGGA  | miRNA | miR-182      |
| t0006407 | 20 | 55 TAGTAGCACATAATGGTTTTG        | miRNA | miR-15a      |
| t0006346 | 22 | 55 TGTAGTGTTCCTACTTTATGG        | miRNA | miR-142-3p   |
| t0006319 | 22 | 55 TACCACAGGGTAGAACTATGGA       | miRNA | miR-140      |
| t0006394 | 23 | 55 AACACAGGGTAGAACCCACGGAC      | miRNA | miR-140      |
| t0006444 | 19 | 55 CCACAGGGTAGAACCCACGG         | miRNA | miR-140      |
| t0006309 | 22 | 55 ACCACAGGGTAGAACCCCGGAC       | miRNA | miR-140      |
| t0006458 | 24 | 55 ACCACAGGGTAGAACCCACGGATGA    | miRNA | miR-140      |
| t0006395 | 24 | 55 TACAGTACTGTGATAACTGAAAAA     | miRNA | miR-101      |
| t0006401 | 21 | 55 TACAGCACTGTGATAACTGAA        | miRNA | miR-101      |
| t0006315 | 22 | 55 TGAGGTAGTAGTTTCTACAGTT       | miRNA | let-7g       |
| t0006404 | 23 | 55 TGAGTTAGTAGTTTGTACAGTTA      | miRNA | let-7g       |
| t0006452 | 22 | 55 AGAGGTAGTAGTTCCATAGTT        | miRNA | let-7d       |
| t0006371 | 20 | 55 TGAGGTAGTAGTTGTGGGG          | miRNA | let-7b       |
| t0006331 | 22 | 55 TGAGGTAGTAGTTGTATCGTT        | miRNA | let-7        |
| t0006392 | 22 | 55 TGAGGTCGTAGTTGTATAGTT        | miRNA | let-7        |
| t0006321 | 22 | 55 TGAGGTAGTAAGTTGTATAGTT       | miRNA | let-7        |
| t0006383 | 21 | 54 CAATCATGTGCAGTGCCAATA        | miRNA | miR-96*      |
| t0006408 | 22 | 54 TAGAGGAGATGGCGCAGGGGAC       | miRNA | miR-877      |
| t0006427 | 21 | 54 TCCTGTAATGAGCTGCCCCGA        | miRNA | miR-486-5p   |
| t0006437 | 28 | 54 TCCTGTAATGAGCTGCCCCGAGACTGCA | miRNA | miR-486-5p   |
| t0006375 | 21 | 54 AAGGTATTGTTTCAGACTTATG       | miRNA | miR-4678     |
| t0006403 | 27 | 54 AAACCGTTACCATTACTGAGTACGGGG  | miRNA | miR-451      |
| t0006374 | 20 | 54 AAACCGTTACCATTACTGCG         | miRNA | miR-451      |
| t0006418 | 22 | 54 AAACCGTTACCATTACTGAGCT       | miRNA | miR-451      |
| t0006436 | 22 | 54 AAACCGTTACCATTAGTGAGTT       | miRNA | miR-451      |
| t0006422 | 22 | 54 AAACCGTTACCATTCTGAGTT        | miRNA | miR-451      |
| t0006380 | 23 | 54 AATGATACGATCACTCCCGTTGA      | miRNA | miR-425      |
| t0006420 | 22 | 54 TGAGGTGCAGAGAGCGAGACTT       | miRNA | miR-423-5p   |
| t0006454 | 22 | 54 TGGACTCGCAGGAACAGGCCCT       | miRNA | miR-4001b-5p |
| t0006648 | 22 | 54 TCGAATCCCACTCCTGACACCA       | miRNA | miR-3968     |
| t0006573 | 23 | 54 TGAAGACTGAAGTGGAGAAGGGG      | miRNA | miR-3526     |
| t0006543 | 23 | 54 AAAAGCTGGGTTGAGCGGGCGTT      | miRNA | miR-320d     |
| t0006564 | 23 | 54 AAAAGCTTGGTTGAGAGGGCGAA      | miRNA | miR-320a     |
| t0006561 | 25 | 54 AAAAGCTGGGTTGAGAGGGCGAAAT    | miRNA | miR-320a     |
| t0006560 | 23 | 54 GAATCTGAGAAGGCGCACAAAGGT     | miRNA | miR-3200-5p  |
| t0006575 | 20 | 54 TATTGCACATTAAGTTG            | miRNA | miR-32       |
| t0006582 | 22 | 54 TGTAACATCCTCGACTGGATC        | miRNA | miR-30a      |
| t0006615 | 19 | 54 AAGTAATCCAGGATAGGCA          | miRNA | miR-26a      |
| t0006640 | 25 | 54 TAATCTCAGCTGGAACTGTGAATC     | miRNA | miR-216      |
| t0006670 | 24 | 54 CAAAGTGCTCATAGTGCAGGTAGT     | miRNA | miR-20b      |
| t0006632 | 22 | 54 TGGAGAGATAGGCAGTTCCTGA       | miRNA | miR-185      |
| t0006642 | 23 | 54 CGAATCATTATTTGCTGCTCTAG      | miRNA | miR-15b*     |
| t0006483 | 20 | 54 TATAGCAGCACATCATGGTT         | miRNA | miR-15b      |
| t0006577 | 22 | 54 TATCAGCACATCATGGTTTACA       | miRNA | miR-15b      |
| t0006529 | 21 | 54 TAGCAGCACATAATGGTTTGG        | miRNA | miR-15a      |
| t0006462 | 20 | 54 TACAGTATACATGATGTACT         | miRNA | miR-144      |
| t0006655 | 20 | 54 CTACAGTATAGATGATGTAA         | miRNA | miR-144      |
| t0006639 | 22 | 54 TACCACAGGGTAGAACTACGGT       | miRNA | miR-140      |

|          |    |                                 |       |            |
|----------|----|---------------------------------|-------|------------|
| t0006659 | 22 | 54 ACCACAGGGTAGAACTACGGAG       | miRNA | miR-140    |
| t0006511 | 23 | 54 TACCACATGGTAGAACACCGAT       | miRNA | miR-140    |
| t0006550 | 21 | 54 ACCACAGGGTAGAAGTACGGA        | miRNA | miR-140    |
| t0006486 | 22 | 54 CCACAGGGTAGAACACCGATG        | miRNA | miR-140    |
| t0006512 | 20 | 54 CTCGGCGTGGCGTCGGTCTGT        | miRNA | miR-1307   |
| t0006667 | 23 | 54 TGCAGCATTGTACAGGGCTATGA      | miRNA | miR-103a   |
| t0006624 | 24 | 54 AAAGCAGCATTGTACAGGGCTATG     | miRNA | miR-103a   |
| t0006464 | 20 | 54 AAGCAGCATTGTACAGGGCT         | miRNA | miR-103a   |
| t0006516 | 23 | 54 GTACAGTACTGTGATAACTGAAG      | miRNA | miR-101    |
| t0006471 | 24 | 54 AACCCGTAGATCCGAACCTTGTATC    | miRNA | miR-100    |
| t0006614 | 22 | 54 TGAGGTAGTAGTTTGTACGGTT       | miRNA | let-7g     |
| t0006638 | 22 | 54 TGAGGTAGTGTATTGTATAGTT       | miRNA | let-7f-5p  |
| t0006469 | 20 | 54 TGAGGTAATAGATTGTATAG         | miRNA | let-7f     |
| t0006510 | 24 | 54 TGAGGTAGTAGGTTGTGTGGAGAT     | miRNA | let-7b     |
| t0006545 | 22 | 54 TGAGGTAGTACGTTGTGTGGTT       | miRNA | let-7b     |
| t0006567 | 21 | 53 ATTGCACTTGTCCCGGCTTGT        | miRNA | miR-92c    |
| t0006620 | 20 | 53 TCCTGTACTGAGCTGTCCCG         | miRNA | miR-486-5p |
| t0006530 | 22 | 53 TCCTGTTCTGAGCTGCCCCGAG       | miRNA | miR-486-5p |
| t0006522 | 22 | 53 TCCTGTACTGAGCCGCCCCGAG       | miRNA | miR-486-5p |
| t0006602 | 23 | 53 AAACCGTTACCATTACTTAGTTT      | miRNA | miR-451    |
| t0006629 | 23 | 53 AAACCTTTACCATTACTTAGTTT      | miRNA | miR-451    |
| t0006503 | 19 | 53 AAAGTGTACCATTACTGA           | miRNA | miR-451    |
| t0006554 | 22 | 53 TTGGAAGTGGAGTCAGAAGGCA       | miRNA | miR-378b   |
| t0006463 | 23 | 53 TTATAATACAACCTGATAAGTAA      | miRNA | miR-374a   |
| t0006651 | 25 | 53 AACTTTGAAGACTGAAGTGGAGAAG    | miRNA | miR-3526   |
| t0006584 | 23 | 53 AAAAGCTGGGTTGAGAGGGAGTT      | miRNA | miR-320d   |
| t0006574 | 23 | 53 AAAAGCTGGGTTGAGAGGGAGAT      | miRNA | miR-320d   |
| t0006590 | 22 | 53 AAAGCTGGGTTGAGAGGGCGAG       | miRNA | miR-320a   |
| t0006767 | 23 | 53 GAAAGCTGGGTTGAGAGGGCGAA      | miRNA | miR-320a   |
| t0006700 | 22 | 53 CTAGCACCATCTGAAATCGGTT       | miRNA | miR-29c    |
| t0006744 | 23 | 53 TGGACAGAAAGGCAGTTCCTGAA      | miRNA | miR-185    |
| t0006786 | 21 | 53 TACAGCACGTAAATATTGGCG        | miRNA | miR-16     |
| t0006712 | 20 | 53 TAGCAGCACGTAAATATTGA         | miRNA | miR-16     |
| t0006722 | 20 | 53 TAGCATCACATAATGGTTTG         | miRNA | miR-15a    |
| t0006822 | 21 | 53 TAGCAGCACACAATGGTTTGT        | miRNA | miR-15a    |
| t0006850 | 20 | 53 TACAGTGTAGATGATGTACT         | miRNA | miR-144    |
| t0006826 | 22 | 53 TACAGTATAGATGATGTACTAG       | miRNA | miR-144    |
| t0006706 | 24 | 53 TCTGGGCAACAAAGTGAGACCTAA     | miRNA | miR-1285   |
| t0006788 | 21 | 53 AGCAGCATTGTACAGGGATAT        | miRNA | miR-103a   |
| t0006861 | 21 | 53 TACAGTACTGTGATAAATGAA        | miRNA | miR-101    |
| t0006818 | 22 | 53 TGACGTAGTAGTTTGTACAGTT       | miRNA | let-7g     |
| t0006823 | 28 | 53 TGAGGTAGTAGATTGTATAGTCGACCGG | miRNA | let-7f     |
| t0006842 | 19 | 53 TGAGGTGGTAGATTGTATA          | miRNA | let-7f     |
| t0006736 | 24 | 53 AGAGGTAGTAGGTTGCATAGTTAT     | miRNA | let-7d     |
| t0006707 | 21 | 53 TGAGGTAGTAGGTTGTATACT        | miRNA | let-7      |
| t0006833 | 19 | 53 TGAGGTAGTAGGTTGTATT          | miRNA | let-7      |
| t0006689 | 26 | 52 AAAGTGTCCCGCCTGTTATTGCAA     | miRNA | miR-92c    |
| t0006726 | 22 | 52 TATTGCACTTGTCTCGGCCTGT       | miRNA | miR-92a    |
| t0006745 | 18 | 52 TATTGCACTTGTCCCGGT           | miRNA | miR-92a    |
| t0006876 | 24 | 52 GTAGAGGAGATGGCGCAGGGGACA     | miRNA | miR-877    |
| t0006872 | 23 | 52 TTCTGTACTGAGCTGCCCCGAGT      | miRNA | miR-486-5p |
| t0006847 | 22 | 52 TTTGTACTGAGCTGCCCCGAGA       | miRNA | miR-486-5p |
| t0006871 | 24 | 52 TCCTGTACTGAGCTGCCCCGAGTG     | miRNA | miR-486-5p |
| t0006820 | 22 | 52 TTTTGTACTGAGCTGCCCCGAG       | miRNA | miR-486-5p |
| t0006755 | 21 | 52 ATAGCAAGAGAACCATTACCA        | miRNA | miR-451b   |
| t0006797 | 21 | 52 ATCGTTACCATTACTGAGTTT        | miRNA | miR-451    |
| t0006691 | 23 | 52 AAAAGCTGGGCTGAGAGGGCGAA      | miRNA | miR-4429   |
| t0006742 | 21 | 52 TGAGGGGCATAGAGCGAGACT        | miRNA | miR-423-5p |

|          |    |                                |       |             |
|----------|----|--------------------------------|-------|-------------|
| t0006830 | 21 | 52 ACTGGACTTGGAGTCAGAAGA       | miRNA | miR-378     |
| t0006961 | 23 | 52 ACTGGACTTGGAGTTAGAAGGCA     | miRNA | miR-378     |
| t0007058 | 23 | 52 TGAAGACTGAAGTGGAGAAGGTT     | miRNA | miR-3526    |
| t0007068 | 22 | 52 GATTATAAAGCAATGAGACTGA      | miRNA | miR-340-5p  |
| t0006982 | 26 | 52 TGCAAACATCCTTCACTGGAAGCATC  | miRNA | miR-30e-5p  |
| t0006911 | 22 | 52 TTCAAGTAATTTAGGATAGGCT      | miRNA | miR-26a     |
| t0006987 | 21 | 52 TCGAGAGAAAGGCAGTTCCTG       | miRNA | miR-185     |
| t0007007 | 23 | 52 TGGAGAGAAATGCAGTTCCTGAA     | miRNA | miR-185     |
| t0007010 | 20 | 52 TGGAGAGAAAGGAAGTTCCT        | miRNA | miR-185     |
| t0006913 | 22 | 52 AAGGGAGATAGAACAGGTCTTG      | miRNA | miR-1839    |
| t0007030 | 21 | 52 AAGCGGCGATGGCGGAGCTGA       | miRNA | miR-1636    |
| t0006934 | 23 | 52 TTAGCAGCACGTAAATATTGGCG     | miRNA | miR-16      |
| t0006972 | 22 | 52 AGCAGCACGTAAATATTGGCGA      | miRNA | miR-16      |
| t0006889 | 18 | 52 TAGCAGCACATTATGGTT          | miRNA | miR-15b     |
| t0007025 | 20 | 52 TACCAGCACATAATGGTTTG        | miRNA | miR-15a     |
| t0006912 | 25 | 52 TTAATGCTAATTGTGATAGGGAATC   | miRNA | miR-155     |
| t0006890 | 19 | 52 TTACAGTATAGATGATGTA         | miRNA | miR-144     |
| t0006975 | 23 | 52 ACCACAGGGTAGAACCACGCACA     | miRNA | miR-140     |
| t0006996 | 22 | 52 TACCACAGGGTAAAACCACGGA      | miRNA | miR-140     |
| t0006905 | 22 | 52 ACCACAGGTTAGAACCACGGAA      | miRNA | miR-140     |
| t0006947 | 22 | 52 ATCACAGGGTAGAACCACGGAA      | miRNA | miR-140     |
| t0006970 | 20 | 52 AGCAGCATTGTACAGGGATA        | miRNA | miR-103a    |
| t0006936 | 24 | 52 TACAGTACTGTGATAACTGAAGAA    | miRNA | miR-101     |
| t0006910 | 20 | 52 TGAGGTGGTAGTTTGTGCTG        | miRNA | let-7i      |
| t0006956 | 22 | 52 TGAAGTAGTAGTTTGTGCTGTT      | miRNA | let-7i      |
| t0006983 | 22 | 52 TGAGGTAGTAGTTTGTGCTCTT      | miRNA | let-7i      |
| t0007020 | 22 | 52 TGAGGTAGTAGATTGTATACTA      | miRNA | let-7f-5p   |
| t0006942 | 21 | 52 AGAGGGAGTAGGTTGCATAGT       | miRNA | let-7d      |
| t0006944 | 22 | 52 AGAGGTAGTAGGTTGAATAGTT      | miRNA | let-7d      |
| t0006919 | 21 | 52 TGTGGTAGTAGGTTGTGTGGT       | miRNA | let-7b      |
| t0006933 | 20 | 52 TGAGGTAGTAGTTTGTGTGT        | miRNA | let-7b      |
| t0006943 | 20 | 52 GAGGTAGTATGTTGTATAGT        | miRNA | let-7       |
| t0006965 | 22 | 51 TATACACTTACTACTTTCCTT       | miRNA | miR-98*     |
| t0007000 | 24 | 51 TATTGCATTTGTCCCGCCTGTAA     | miRNA | miR-92a     |
| t0007061 | 22 | 51 AAAAGTACTTGCGGATTTTGTCT     | miRNA | miR-548k    |
| t0007064 | 20 | 51 AAAAACTGAGACTACTTTTG        | miRNA | miR-548e    |
| t0006903 | 20 | 51 TGGGCACAGGCGGATGGACA        | miRNA | miR-5107    |
| t0007059 | 22 | 51 TCCTCTACTGAGCTGCCCCGAG      | miRNA | miR-486-5p  |
| t0007060 | 27 | 51 TCCTGTACTGAGCTGCCCCGAGACGGT | miRNA | miR-486-5p  |
| t0006902 | 21 | 51 TCCTGTACCGAGCTGCCCCGA       | miRNA | miR-486-5p  |
| t0007005 | 21 | 51 CCTGTACTGAGCTGCCCCGAT       | miRNA | miR-486-5p  |
| t0007054 | 21 | 51 TCGTACTGAGCTGCCCCGAGA       | miRNA | miR-486-5p  |
| t0006986 | 22 | 51 TCCTGTAATGAGCTGCCCCGAG      | miRNA | miR-486-5p  |
| t0006992 | 24 | 51 AAACCCTTACCATTACTGAGTTTA    | miRNA | miR-451     |
| t0006974 | 24 | 51 AAACCGTTACCATTACTGAGTTAG    | miRNA | miR-451     |
| t0007168 | 25 | 51 TGAGGGGCAGAGAGCGAGACTTTAA   | miRNA | miR-423-5p  |
| t0007169 | 23 | 51 TTTGAAGACTGAAGTGGAGAAGG     | miRNA | miR-3526    |
| t0007209 | 24 | 51 TGAAGACTGAAGTGGAGAAGGGGT    | miRNA | miR-3526    |
| t0007161 | 22 | 51 TGAAGTGTCTGGACACAGTAGTA     | miRNA | miR-3505    |
| t0007116 | 22 | 51 AAAAGCTGGGTTGAGAGGGCTT      | miRNA | miR-320d    |
| t0007077 | 24 | 51 AAAAAAGCTGGGTTGAGAGGGCGA    | miRNA | miR-320a    |
| t0007215 | 22 | 51 AAAAGCTGGGTTGAGACGGCGA      | miRNA | miR-320a    |
| t0007228 | 21 | 51 CACTTGCCTACTCAGGTCTG        | miRNA | miR-3200-3p |
| t0007245 | 24 | 51 TGTGGACAGTGAGGTAGAGGGAGA    | miRNA | miR-3138    |
| t0007254 | 24 | 51 TAGGAACCTCATACCGTGCTCATC    | miRNA | miR-276a-3p |
| t0007262 | 20 | 51 AGCTACATCTGGCTACTGGG        | miRNA | miR-222     |
| t0007091 | 24 | 51 TAAAGTGCTTATAGTGCAGGTAGT    | miRNA | miR-20      |
| t0007133 | 19 | 51 TGAGGTAGGTTGTATAGTT         | miRNA | miR-1961    |

|          |    |                               |       |             |
|----------|----|-------------------------------|-------|-------------|
| t0007085 | 23 | 51 CTGACCTATGAGTTGACAGCATC    | miRNA | miR-192     |
| t0007088 | 21 | 51 TGGAGAGAAAAGCAGTTCCTG      | miRNA | miR-185     |
| t0007230 | 21 | 51 TGGAGAGAAAAGGCAATTCCTG     | miRNA | miR-185     |
| t0007165 | 21 | 51 TGTAGAGAAAAGGCAGTTCCTG     | miRNA | miR-185     |
| t0007079 | 23 | 51 GTGGAGAGAAAAGGCAGTTCCTGA   | miRNA | miR-185     |
| t0007090 | 22 | 51 TGGAGAGACAGGCAGTTCCTGA     | miRNA | miR-185     |
| t0007108 | 23 | 51 TGGAGAGAAAAGGCAGTTCCTGAT   | miRNA | miR-185     |
| t0007115 | 23 | 51 AAGGTAGATAGAACAGGTCTTTGT   | miRNA | miR-1839    |
| t0007137 | 21 | 51 TAGCAGCACGTAATATTTGC       | miRNA | miR-16      |
| t0007129 | 22 | 51 TAGCAGCATCTTGGTTTACA       | miRNA | miR-15b     |
| t0007196 | 23 | 51 TACTAGACTGAAGCTCCTTGAGG    | miRNA | miR-151-3p  |
| t0007181 | 22 | 51 TCTCCAACCCTTGTACCAGAA      | miRNA | miR-150     |
| t0007072 | 24 | 51 TCTCCAACCCTTGTACCAGTGAA    | miRNA | miR-150     |
| t0007202 | 20 | 51 CATAAAGTAGAAAGCACTAG       | miRNA | miR-142-5p  |
| t0007100 | 21 | 51 ACCACAGGGTAGAACCACGTA      | miRNA | miR-140     |
| t0007130 | 23 | 51 ACCACAGGGTAGAACCATGGACA    | miRNA | miR-140     |
| t0007182 | 23 | 51 ACCACAGTGTAGAACCACGGAAA    | miRNA | miR-140     |
| t0007216 | 23 | 51 ACCACAGGGTAGAACAACGGACA    | miRNA | miR-140     |
| t0007246 | 22 | 51 CTCGGCGTGGCGTCGGTCTGT      | miRNA | miR-1307    |
| t0007253 | 22 | 51 AGCAGCATTGGACAGGGCTATG     | miRNA | miR-103a    |
| t0007117 | 21 | 51 AGCAGCATCGTACAGGGCTAT      | miRNA | miR-103a    |
| t0007076 | 20 | 51 AGCAGCATTGTACATGGCTA       | miRNA | miR-103a    |
| t0007242 | 22 | 51 TACAGTATTGTGATAACTGAAA     | miRNA | miR-101     |
| t0007103 | 23 | 51 TGAGGTAGTAGTTTGTGTTGTTT    | miRNA | let-7i      |
| t0007243 | 23 | 51 TGAGGTATTAGTTTGTACAGTTA    | miRNA | let-7g      |
| t0007248 | 24 | 51 TCTGAGGTAGTAGATTGTATAGTT   | miRNA | let-7f      |
| t0007235 | 23 | 51 TGAGGTAGGAGTTGTATAGTTG     | miRNA | let-7       |
| t0007125 | 21 | 50 ATTGCACTTGTCTCGGCCTGT      | miRNA | miR-92c     |
| t0007145 | 22 | 50 TATTGCACTTGTCCCGGCCTTA     | miRNA | miR-92b     |
| t0007206 | 22 | 50 TATTGCACTCGTCCCGGCCAAA     | miRNA | miR-92      |
| t0007217 | 24 | 50 TGCGGGGCTAGGGCTAACAGCATC   | miRNA | miR-744     |
| t0007150 | 21 | 50 CTTGTACTGAGCTGCCCCGAG      | miRNA | miR-486-5p  |
| t0007107 | 23 | 50 TCCTGTACTGAGCTGCCCCGTAA    | miRNA | miR-486-5p  |
| t0007203 | 21 | 50 TTGTACTGAGCTGCCCCGAGA      | miRNA | miR-486-5p  |
| t0007205 | 23 | 50 TTCGGGGTCTGGGCGGGCGATT     | miRNA | miR-4508    |
| t0007259 | 22 | 50 TCGAAATCGAGTCACGGCACCA     | miRNA | miR-4454    |
| t0007229 | 23 | 50 ACTGGACTTGGAGTCAGAAGGCC    | miRNA | miR-378     |
| t0007143 | 23 | 50 AATCCTTGGAAACCTAGGTGTGAG   | miRNA | miR-362-5p  |
| t0007192 | 24 | 50 TTGAAGACTGAAGTTGAGAACGGT   | miRNA | miR-3526    |
| t0007238 | 24 | 50 GAAAAGCTGGGTTGAGAGGGCGAA   | miRNA | miR-320a    |
| t0007268 | 23 | 50 AAAAGCTGGCTTGAGAGGGCGAA    | miRNA | miR-320a    |
| t0007379 | 20 | 50 CTGGGAGGTGGATGTTTACT       | miRNA | miR-30b*    |
| t0007464 | 26 | 50 GTAGGCCGGCGGAAACTACTTGCATC | miRNA | miR-2796-3p |
| t0007323 | 22 | 50 AGGCGGAGACTTGGGCAATTGA     | miRNA | miR-25*     |
| t0007263 | 22 | 50 CATTGCACTTGTCTTGGTCTGT     | miRNA | miR-25      |
| t0007409 | 22 | 50 CATTGCACTTGTCTCGCTCTGT     | miRNA | miR-25      |
| t0007418 | 22 | 50 ATCACATTGTCAGGGATTTCCA     | miRNA | miR-23a     |
| t0007476 | 25 | 50 CTGACCTATGAATTGACAGCCAATC  | miRNA | miR-192     |
| t0007510 | 25 | 50 CTGACCTATGAATTGACAGCCAGTA  | miRNA | miR-192     |
| t0007431 | 23 | 50 TGGAGGGAAAAGGCAGTTCCTGAA   | miRNA | miR-185     |
| t0007339 | 23 | 50 CAAAGTGCTTACAGTGCAGGTAT    | miRNA | miR-17a     |
| t0007478 | 22 | 50 TAGCAGCACGTAACATTGGTG      | miRNA | miR-16      |
| t0007275 | 22 | 50 TTGCAGCACGTAATATTGGCG      | miRNA | miR-16      |
| t0007381 | 24 | 50 TAGCAGTACGTAATATTGGCGAT    | miRNA | miR-16      |
| t0007486 | 22 | 50 ACCATAAAGTAGAAAGCACTA      | miRNA | miR-142     |
| t0007504 | 25 | 50 ACCACAGGGTAGAACCACGGACATC  | miRNA | miR-140     |
| t0007479 | 23 | 50 CCACAGGGTAGAACCACGGAAGA    | miRNA | miR-140     |
| t0007453 | 22 | 50 TACCACAGGGTAGGACCACGGA     | miRNA | miR-140     |



|          |    |                                 |       |             |
|----------|----|---------------------------------|-------|-------------|
| t0007484 | 20 | 50 ACCATAGGGTAGAACCACGG         | miRNA | miR-140     |
| t0007271 | 21 | 50 TGCTGGATCAGTGGTTTCGAGT       | miRNA | miR-1287    |
| t0007343 | 22 | 50 TGGGAGGCGGAGGTTGCAGTGA       | miRNA | miR-1273f   |
| t0007406 | 20 | 50 AGCAGCATTGTACGGGGCTA         | miRNA | miR-103a    |
| t0007393 | 21 | 50 AGCAGCATTGTATTGGGCTAT        | miRNA | miR-103a    |
| t0007477 | 22 | 50 AGCAGCATTGTAGAGGGCTATG       | miRNA | miR-103a    |
| t0007299 | 21 | 50 AGCAGCATTGTACAGGGCTCT        | miRNA | miR-103a    |
| t0007313 | 22 | 50 GTACAGTACTGTGATAATCGAC       | miRNA | miR-101c    |
| t0007353 | 22 | 50 TGAGGTAGTAGATTGTAATGTT       | miRNA | let-7f      |
| t0007272 | 21 | 50 TGAGGTAGTAGGTTGTGTGCT        | miRNA | let-7b      |
| t0007334 | 21 | 50 TGAGGTTGTAGGTTGTGTGGT        | miRNA | let-7b      |
| t0007370 | 22 | 50 TGACGTAGTAGGTTGTGTGGTT       | miRNA | let-7b      |
| t0007401 | 19 | 50 TGAGGTAGTAGGTATAGTT          | miRNA | let-7a      |
| t0007460 | 21 | 50 TGAGGTCGTAGGTTGTATAGT        | miRNA | let-7       |
| t0007335 | 22 | 49 CAAAGTGCTGTTCTGTCAGTTA       | miRNA | miR-93      |
| t0007427 | 23 | 49 TATTGCACTTGTCTTGGCCTGTA      | miRNA | miR-92a     |
| t0007286 | 23 | 49 GTAGAGGAGATGGCGCAGGGGAA      | miRNA | miR-877     |
| t0007338 | 23 | 49 GACTATAGAACTTTCCCCCTGAA      | miRNA | miR-625*    |
| t0007366 | 21 | 49 GAGCTTATTCATAAAAAGTGCA       | miRNA | miR-590-5p  |
| t0007482 | 22 | 49 CCTCCCACACCTAAGGCTTGCA       | miRNA | miR-532-3p  |
| t0007459 | 22 | 49 TCCTGTACTGGGCTGCCCGAG        | miRNA | miR-486-5p  |
| t0007320 | 22 | 49 AGCTGTAGAGCAGGAGCAGGA        | miRNA | miR-4732-5p |
| t0007372 | 21 | 49 CTGGGAAGAGGAGCTGAGGGA        | miRNA | miR-4646-5p |
| t0007450 | 27 | 49 AAACCGTTACCATTACTGAGTTTAGTA  | miRNA | miR-451     |
| t0007452 | 23 | 49 AAACCGTTACTATTACTGAGTTT      | miRNA | miR-451     |
| t0007454 | 19 | 49 TGAGGGGCAGAGAGCGATA          | miRNA | miR-423-5p  |
| t0007493 | 21 | 49 TGATGGGCAGAGAGCGAGACT        | miRNA | miR-423-5p  |
| t0007585 | 22 | 49 TGGGGGCAGAGAGCGAGACTT        | miRNA | miR-423-5p  |
| t0007588 | 29 | 49 GACTTTGAAGACTGAAGTGGAGAAGGGT | miRNA | miR-3526    |
| t0007522 | 21 | 49 AACCTTGAAGACTGAAGTGGA        | miRNA | miR-3526    |
| t0007565 | 22 | 49 TGAAGACTGAAGTGGAGAAGTG       | miRNA | miR-3526    |
| t0007531 | 25 | 49 TCTCACACAGAAATCGCATCCGTCA    | miRNA | miR-342-3p  |
| t0007595 | 21 | 49 TTATAAAGCAATGAGACTGAA        | miRNA | miR-340-5p  |
| t0007557 | 22 | 49 AAAAGCTGGGTTGAGAGGCGTT       | miRNA | miR-320d    |
| t0007594 | 21 | 49 AAAAGCTGGGTTGAGAGGGAA        | miRNA | miR-320d    |
| t0007726 | 21 | 49 AAAAGTTGGGTTGAGAGGGCG        | miRNA | miR-320a    |
| t0007608 | 22 | 49 AAAATCTGGGTTGAGAGGGCGA       | miRNA | miR-320a    |
| t0007694 | 21 | 49 AAGCTGGGTTGAGAGGGCGAA        | miRNA | miR-320a    |
| t0007530 | 22 | 49 CATTGCACTTGTCTCTGTCTGA       | miRNA | miR-25      |
| t0007634 | 22 | 49 TAGGTAGTTTCTGTTGTTGGG        | miRNA | miR-196b    |
| t0007690 | 24 | 49 TAGGTAGTTTTCATGTTGTTGGATC    | miRNA | miR-196a    |
| t0007574 | 24 | 49 CTGACCTATGAATTGACAGCCATT     | miRNA | miR-192     |
| t0007683 | 21 | 49 CTGATCTATGAATTGACAGCC        | miRNA | miR-192     |
| t0007739 | 22 | 49 CAAAGAATTCTCCTTTTGGGCT       | miRNA | miR-186     |
| t0007600 | 21 | 49 TAGAGAGAAAGGCAGTTCCTG        | miRNA | miR-185     |
| t0007547 | 23 | 49 TGGAGAGAAAGGCAGTTCATGAA      | miRNA | miR-185     |
| t0007635 | 22 | 49 TGCAGAGAAAGGCAGTTCCTGA       | miRNA | miR-185     |
| t0007741 | 22 | 49 TGGAGAGAAAGGCATTTCTGT        | miRNA | miR-185     |
| t0007616 | 21 | 49 AGACCTACTTATCTACCAACT        | miRNA | miR-1839-3p |
| t0007655 | 26 | 49 TGGGGGCGGGGAGCGGTCGGGCGGTT   | miRNA | miR-1607    |
| t0007712 | 22 | 49 TAGCAGCACGTAATAGTGGCG        | miRNA | miR-16      |
| t0007584 | 26 | 49 ATTTTAGCAGCACGTAATATTGGCG    | miRNA | miR-16      |
| t0007693 | 23 | 49 TAGCAGCACGTTAATATTGGCGA      | miRNA | miR-16      |
| t0007680 | 22 | 49 TTAATGCTAATCGTGATAGGGG       | miRNA | miR-155     |
| t0007546 | 21 | 49 TGAGATGAAGCACTGTAGCTC        | miRNA | miR-143     |
| t0007576 | 21 | 49 ACCACAGGGTAGAACCACCGA        | miRNA | miR-140     |
| t0007572 | 22 | 49 TACCACAGAGTAGAACCACGGA       | miRNA | miR-140     |
| t0007613 | 23 | 49 TACCACAGGGTGAACCACGGAC       | miRNA | miR-140     |

|          |    |                                |       |             |
|----------|----|--------------------------------|-------|-------------|
| t0007622 | 23 | 49 TACCACAGGGTAGAACAACGGAT     | miRNA | miR-140     |
| t0007724 | 26 | 49 TTATTGCTTAAGAATACGCGTAGATC  | miRNA | miR-137     |
| t0007729 | 22 | 49 TACCGCACTGTGGGTA CTTGCA     | miRNA | miR-106b*   |
| t0007723 | 21 | 49 AGCAGCATTGGACAGGGCTAT       | miRNA | miR-103a    |
| t0007519 | 20 | 49 TACAGTACTTTGATAACTGA        | miRNA | miR-101     |
| t0007520 | 21 | 49 GTACAGTACTGTGATAACTGC       | miRNA | miR-101     |
| t0007631 | 22 | 49 TGAGGTAGTAGATTGTGCTGTT      | miRNA | let-7i      |
| t0007669 | 23 | 49 TGAGGTAGTACATTGTATAGTTG     | miRNA | let-7f      |
| t0007528 | 22 | 49 TGAGGTAGTAGGTAGTGTGGTT      | miRNA | let-7b      |
| t0007681 | 25 | 49 TGAGGTAGTAGGTTGTGTGGTTTAA   | miRNA | let-7b      |
| t0007525 | 25 | 49 TGAGGTAGTAGGTTGTGTGGTAGTC   | miRNA | let-7b      |
| t0007575 | 21 | 49 TGAGATAGTAGGTTGTGTGGT       | miRNA | let-7b      |
| t0007656 | 21 | 49 TGAGTTAGTAGGTTGTATAGT       | miRNA | let-7       |
| t0007658 | 23 | 48 CACCCGGCTGTGTGCACATGTGA     | miRNA | miR-941     |
| t0007636 | 22 | 48 ATTGCATTTGTCCCGCCTGTT       | miRNA | miR-92c     |
| t0007700 | 24 | 48 TACGTCATCGTTGTCATCGTCATT    | miRNA | miR-598     |
| t0007597 | 20 | 48 TTCTGTACTGAGCTGCCCCG        | miRNA | miR-486-5p  |
| t0007692 | 22 | 48 TCCTTTACTGAGCTGCCCCGAG      | miRNA | miR-486-5p  |
| t0007736 | 20 | 48 TCTTGATTGAGCTGCCCCG         | miRNA | miR-486-5p  |
| t0007623 | 24 | 48 TCCTGTACTGAGCTGCTTCGAGGA    | miRNA | miR-486-5p  |
| t0007556 | 24 | 48 TGTAGAGCAGGGAGCAGGAAGTTG    | miRNA | miR-4732-5p |
| t0007612 | 22 | 48 AAGGGCTGGGTCGGTCGGGCTG      | miRNA | miR-4651    |
| t0007643 | 23 | 48 AAACCGTTACCATTACTGGGTTT     | miRNA | miR-451     |
| t0007708 | 23 | 48 AATGACACGATCACTCTCGTTGA     | miRNA | miR-425     |
| t0007727 | 22 | 48 TGAAGGGCAGAGAGCGAGACTT      | miRNA | miR-423-5p  |
| t0007535 | 22 | 48 TGAGGGGCAGAGAGCGGACTT       | miRNA | miR-423-5p  |
| t0008008 | 21 | 48 TGAGGGGCAGAAAGCGAGACT       | miRNA | miR-423-5p  |
| t0007873 | 23 | 48 AAAAGCTGGGTTGATAGGGCGTA     | miRNA | miR-320d    |
| t0007745 | 22 | 48 AAAATCTGGGTTGAGAGGGCGT      | miRNA | miR-320d    |
| t0007760 | 22 | 48 TTCAAGTAATCCAGGATAGGAA      | miRNA | miR-26a     |
| t0007822 | 22 | 48 CATTGCACTTGTCTCGGTTTTA      | miRNA | miR-25      |
| t0007843 | 25 | 48 TTGGGGAAACGGCCGCTGAGTGAGT   | miRNA | miR-2110    |
| t0007959 | 27 | 48 TAGCTTATCAGACTGATGTTGACTATC | miRNA | miR-21      |
| t0007886 | 23 | 48 TAGGTAGTTTCTGTTGTTGGGT      | miRNA | miR-196b    |
| t0007990 | 21 | 48 TGGAGTGAAAGGCAGTTCCTG       | miRNA | miR-185     |
| t0007958 | 19 | 48 TACAGCACGTAAATATTGG         | miRNA | miR-16      |
| t0007903 | 21 | 48 CGAATCATTATTTGCTGCTCT       | miRNA | miR-15b*    |
| t0007761 | 20 | 48 TAGCGGCACATCATGGTTTA        | miRNA | miR-15b     |
| t0007853 | 23 | 48 ACCACAGGGTAGAACTACGGATA     | miRNA | miR-140     |
| t0007915 | 23 | 48 TACCACAGTGTAGAACCACGGAT     | miRNA | miR-140     |
| t0007747 | 21 | 48 TCTGGGCAACAAAGTGAGACA       | miRNA | miR-1285    |
| t0007872 | 23 | 48 CTGGAGATATGGAAGAGCTGTGT     | miRNA | miR-1270    |
| t0008010 | 22 | 48 AGCAGCATTTTACAGGGCTATG      | miRNA | miR-103a    |
| t0007815 | 20 | 48 TACAGTATTGTGATAACTGA        | miRNA | miR-101     |
| t0007864 | 22 | 48 TACAGTATTGTGATAACTGAAG      | miRNA | miR-101     |
| t0007993 | 20 | 48 TGAGGTAGTAGATTGTATAC        | miRNA | let-7f      |
| t0007792 | 18 | 48 TGTAGTAGATTGTATAGT          | miRNA | let-7f      |
| t0007905 | 25 | 48 TGAGGTAGTAGATTGTATAGTTCGT   | miRNA | let-7f      |
| t0007871 | 22 | 48 AGAGGTAGTAGGTTGCGTAGTT      | miRNA | let-7d      |
| t0007874 | 22 | 48 TGAGGTAGTGGGTTGTGTGGTA      | miRNA | let-7b      |
| t0007762 | 20 | 48 TGAGGTAGTAGGGTGTGTGG        | miRNA | let-7b      |
| t0007787 | 20 | 48 TGAGGTAGTAGGCTGTATAG        | miRNA | let-7       |
| t0007790 | 26 | 48 TGAGGTAGTAGGTTGTATAGTTTATC  | miRNA | let-7       |
| t0007943 | 20 | 48 CGAGGTAGTAGGTTGTATAG        | miRNA | let-7       |
| t0007858 | 19 | 47 ATTGCACTTGTCCCGGCCT         | miRNA | miR-92c     |
| t0007979 | 22 | 47 AGGGACGGGACGCGGTGCAGTA      | miRNA | miR-92b*    |
| t0007888 | 23 | 47 TATTTCACTTGTCCCGGCCTGTA     | miRNA | miR-92a     |
| t0007996 | 22 | 47 GTAGAGGAGATGGCGTAGGGGA      | miRNA | miR-877     |

|          |    |                                   |       |              |
|----------|----|-----------------------------------|-------|--------------|
| t0007929 | 24 | 47 TGAAGATTGAAGTGGAGAAGGGTT       | miRNA | miR-739      |
| t0007975 | 19 | 47 AAAGTAATCGTGGTCTTTG            | miRNA | miR-548j     |
| t0008000 | 26 | 47 TCCTGTAAGTACTGAGCTGCCCCGAGACGG | miRNA | miR-486-5p   |
| t0007866 | 21 | 47 TCCTGTAAGTACTGAGCTGCCCCGA      | miRNA | miR-486-5p   |
| t0007896 | 25 | 47 TCCTGTAAGTACTGAGCTGCCCCGAGTGA  | miRNA | miR-486-5p   |
| t0007977 | 22 | 47 TCAGGCTCAGTCCCCTCCCGAT         | miRNA | miR-484      |
| t0007828 | 22 | 47 AAACCGTTACCACTACTGAGTT         | miRNA | miR-451      |
| t0007904 | 23 | 47 TGAGGGGCAGAGAGAGAGACTTA        | miRNA | miR-423-5p   |
| t0007985 | 21 | 47 TGAGGGGCACAGAGCGAGACT          | miRNA | miR-423-5p   |
| t0008092 | 21 | 47 TGAGGGGCAGAGAGCGAGACC          | miRNA | miR-423-5p   |
| t0008088 | 21 | 47 GAGGGACTTTCAGGGGCAGCT          | miRNA | miR-365-5p   |
| t0008156 | 22 | 47 AATTGCACGGTATCCATCTCTA         | miRNA | miR-363      |
| t0008118 | 21 | 47 TTGAGGACTGAAGTGGGGAAA          | miRNA | miR-3526     |
| t0008246 | 20 | 47 TCTCACACAGAAATCGCACC           | miRNA | miR-342-3p   |
| t0008059 | 23 | 47 GCAAAGCACACGGCCTGCAGAGT        | miRNA | miR-330-3p   |
| t0008052 | 21 | 47 AAAAGCTGGGTTGAGAGGGTA          | miRNA | miR-320d     |
| t0008089 | 23 | 47 AAAAGCTGGGTTGAGAGGGCAGA        | miRNA | miR-320d     |
| t0008284 | 21 | 47 AAAGCTGGGTTGAGAGGGCAA          | miRNA | miR-320b     |
| t0008172 | 22 | 47 AAAAGATGGGTTGAGAGGGCGA         | miRNA | miR-320a     |
| t0008220 | 22 | 47 AAAAGCTGGGTTGAAAGGGCGA         | miRNA | miR-320a     |
| t0008033 | 23 | 47 AAAAGCTGGGTAGAGAGGGCGAT        | miRNA | miR-320a     |
| t0008206 | 19 | 47 TGGGACAAGAGGACGGTCT            | miRNA | miR-3122     |
| t0008255 | 22 | 47 CATTGCGCTTGTCTCGGTCTGA         | miRNA | miR-25       |
| t0008276 | 21 | 47 CATTGCACTTGTCTCGGTTTG          | miRNA | miR-25       |
| t0008055 | 21 | 47 AGAGTTGAGTCTGGACGTCTT          | miRNA | miR-219-1-3p |
| t0008084 | 20 | 47 TAAAGTGCTTATAGTGCAGG           | miRNA | miR-20       |
| t0008098 | 23 | 47 CAACGGAATCCCAAAGAAGCTG         | miRNA | miR-191      |
| t0008203 | 21 | 47 AACGGAATCCAAAAGCAGCT           | miRNA | miR-191      |
| t0008181 | 21 | 47 TGGAGAGAAAGGCGGTTCCCTG         | miRNA | miR-185      |
| t0008186 | 22 | 47 GGGAGAGAAAGGCAGTTCCTGA         | miRNA | miR-185      |
| t0008097 | 24 | 47 TGGAGAGAAAGGCAGTTCCTGACA       | miRNA | miR-185      |
| t0008091 | 23 | 47 TAGCAGCACGTAAATATTGGCTT        | miRNA | miR-16b      |
| t0008224 | 23 | 47 TAGCAGCATGTAATATTGGCGA         | miRNA | miR-16       |
| t0008254 | 20 | 47 AGCAGCACGTAAATATTGCG           | miRNA | miR-16       |
| t0008211 | 22 | 47 AGCAGCACATCATGGTTTACAT         | miRNA | miR-15b      |
| t0008069 | 20 | 47 TAGCAGCACATCATGGATTA           | miRNA | miR-15b      |
| t0008288 | 30 | 47 TAGCAGCACATCATGGTTTACAAATCATG  | miRNA | miR-15b      |
| t0008094 | 19 | 47 AGCAGCACATAATGGTTTG            | miRNA | miR-15a      |
| t0008235 | 24 | 47 TATCAGCACATAATGGTTTGTGGA       | miRNA | miR-15a      |
| t0008034 | 22 | 47 ACCACAGGGTAGAATCACGGAT         | miRNA | miR-140      |
| t0008099 | 22 | 47 CCACAGGGTAGAACCACGGAAA         | miRNA | miR-140      |
| t0008124 | 22 | 47 ACCACAGGGGAGAACCACGGAC         | miRNA | miR-140      |
| t0008126 | 23 | 47 ACTGGAGATATGGAAGAGCTGTG        | miRNA | miR-1270     |
| t0008134 | 22 | 47 TAGCGCACTGTGGTACTTGCT          | miRNA | miR-106b*    |
| t0008120 | 21 | 47 AGCATCATTGTACAGGGCTAT          | miRNA | miR-103a     |
| t0008030 | 21 | 47 ATACAGTACTGTGATAACTGA          | miRNA | miR-101      |
| t0008044 | 25 | 47 TGAGGTAGTAGTTTGTACAGTTATC      | miRNA | let-7g       |
| t0008063 | 25 | 47 TGAGGTAGTAGTTTGTACAGTTAGA      | miRNA | let-7g       |
| t0008116 | 23 | 47 TGAGGTAGTAGATTGTATAGTAT        | miRNA | let-7f       |
| t0008230 | 24 | 47 TAGGTAGTAGGTTGTATGGTTATC       | miRNA | let-7c       |
| t0008072 | 23 | 47 TGAGGTAGTAGGTTGTGTGGAGA        | miRNA | let-7b       |
| t0008146 | 21 | 47 TGAGGTAGTCGGTTGTGTGGT          | miRNA | let-7b       |
| t0008047 | 21 | 47 TGAGGTGGTAGGTTGTGTGGA          | miRNA | let-7b       |
| t0008154 | 24 | 47 TGAGGTAGTAGGTTGTGTGGTAAT       | miRNA | let-7b       |
| t0008279 | 24 | 47 TGAGGTAGTAGGTTGTGTGGGTTG       | miRNA | let-7b       |
| t0008213 | 22 | 47 TGAGGTAGTAGGTTGTATAGCT         | miRNA | let-7        |
| t0008270 | 22 | 47 TGAGGTAGTCGGTTGTATAGTT         | miRNA | let-7        |
| t0008078 | 22 | 46 CAGGTGGAAGGTTGTAGGCATG         | miRNA | miR-965-5p   |

|          |    |                                |       |             |
|----------|----|--------------------------------|-------|-------------|
| t0008157 | 22 | 46 TATTGCATCTGTCCCGCCTGT       | miRNA | miR-92a     |
| t0008024 | 23 | 46 AAAGACTTGAGTAGTGAGACGTT     | miRNA | miR-71b-5p  |
| t0008061 | 24 | 46 AACTGGCTAGGGAAAATGATTGGA    | miRNA | miR-664*    |
| t0008129 | 20 | 46 TCCTGTAAGTACTGAGCTGCTTCG    | miRNA | miR-486-5p  |
| t0008027 | 23 | 46 TCTCGTACTGAGCTGCCCGAGA      | miRNA | miR-486-5p  |
| t0008046 | 22 | 46 TCCTGTAAGTACTGAGCTGATCCGAG  | miRNA | miR-486-5p  |
| t0008159 | 21 | 46 TCAGGCTCAGTCTTCTCCCGA       | miRNA | miR-484     |
| t0008161 | 22 | 46 TACACACACACACATACACAGA      | miRNA | miR-466i-3p |
| t0008187 | 25 | 46 AGAAACCGTTACCATTACTGAGTTT   | miRNA | miR-451     |
| t0008232 | 23 | 46 AAACCGTTACCATTAATGAGTTT     | miRNA | miR-451     |
| t0008048 | 20 | 46 AAACCGTTACCATCACTGAG        | miRNA | miR-451     |
| t0008207 | 27 | 46 AAACCGTTACCATTACTGAGTTGGATA | miRNA | miR-451     |
| t0008559 | 20 | 46 ACTCCCACTGCTTCACTTGA        | miRNA | miR-4301    |
| t0008565 | 22 | 46 TGAGGGGAGAGAGCGAGATTA       | miRNA | miR-423-5p  |
| t0008448 | 20 | 46 AATTGCACGGTATCCATCTA        | miRNA | miR-363     |
| t0008406 | 20 | 46 TCCGTGCTGAGATTTCTGCA        | miRNA | miR-3492    |
| t0008378 | 24 | 46 CAAAGCACACGGCCTGCAGAGAGG    | miRNA | miR-330-3p  |
| t0008488 | 22 | 46 CGCATCCCCTAGGGCATTGGTG      | miRNA | miR-324-5p  |
| t0008555 | 21 | 46 AAAAGCCGGGTTGAGAGGGCG       | miRNA | miR-320c    |
| t0008524 | 20 | 46 TGTAACATCCTACACTCTC         | miRNA | miR-30c     |
| t0008535 | 21 | 46 TTTCAGTCCGATGTTTACAGT       | miRNA | miR-30b-3p  |
| t0008365 | 22 | 46 TTCAAGTAATCCAGGATAGGTT      | miRNA | miR-26a     |
| t0008471 | 23 | 46 AGGCGGAGACTTGGCAATTGCA      | miRNA | miR-25*     |
| t0008495 | 21 | 46 CATTGCACTTGTCTCGGCCTG       | miRNA | miR-25      |
| t0008527 | 20 | 46 CATTGCACTTGTCTCGGTCA        | miRNA | miR-25      |
| t0008403 | 21 | 46 CATTGCACTTGTCTCTGTCTG       | miRNA | miR-25      |
| t0008532 | 22 | 46 ATCACATTGCCAGGGATTACCA      | miRNA | miR-23b     |
| t0008561 | 22 | 46 TAGGATGGGGTGTGATAGGATC      | miRNA | miR-2392    |
| t0008446 | 22 | 46 TACAGTAGTCTGCACATTGGTT      | miRNA | miR-199*    |
| t0008511 | 18 | 46 TGAGGTAGTTGTATAGT           | miRNA | miR-1961    |
| t0008453 | 22 | 46 CAACGGGATCCAAAAGCAGCT       | miRNA | miR-191     |
| t0008292 | 21 | 46 TGGAGAGCAAGGCAGTTCCTG       | miRNA | miR-185     |
| t0008539 | 26 | 46 TGGAGAGAAAGGCAGTTCCTGAAGGT  | miRNA | miR-185     |
| t0008362 | 27 | 46 TTTGGCAATGGTAGAACTCACACTGAT | miRNA | miR-182     |
| t0008363 | 25 | 46 GGAAGCGGCGATGGCGGAGCTGAAA   | miRNA | miR-1636    |
| t0008457 | 22 | 46 CGAATCATTATTTGCTGCTCTA      | miRNA | miR-15b*    |
| t0008438 | 19 | 46 AGCAGCACATCATGGTTTA         | miRNA | miR-15b     |
| t0008463 | 20 | 46 TAGCAGCACATCATGGTTTC        | miRNA | miR-15b     |
| t0008477 | 20 | 46 TAGCAACACATAATGGTTTG        | miRNA | miR-15a     |
| t0008548 | 20 | 46 TCGAGGAGCTCACAGTCTAG        | miRNA | miR-151-5p  |
| t0008307 | 19 | 46 TACAGTATAGATGATGTTC         | miRNA | miR-144     |
| t0008501 | 20 | 46 CTACAGTATAGATGATGTAT        | miRNA | miR-144     |
| t0008421 | 24 | 46 TACCACAGGGTAGAACCACGGCCG    | miRNA | miR-140     |
| t0008523 | 22 | 46 ATAAAGTGCTGACAGTGCAGAA      | miRNA | miR-106b    |
| t0008340 | 23 | 46 AGCAGCATTGTACAGGGATATGA     | miRNA | miR-103a    |
| t0008505 | 20 | 46 TGAGGGAGTAGTTTGTGCTG        | miRNA | let-7i      |
| t0008350 | 23 | 46 TTAGGTAGTAGATTGTATAGTTT     | miRNA | let-7f      |
| t0008445 | 20 | 46 TGAGCTAGTAGATTGTATAG        | miRNA | let-7f      |
| t0008371 | 24 | 46 TGAGGTAGTAGATTGTATAGTTGT    | miRNA | let-7f      |
| t0008347 | 22 | 46 AGAGGCAGTAGGTTGCATAGTT      | miRNA | let-7d      |
| t0008493 | 23 | 46 TGAGGTAGTAGGTTGTGTGTTT      | miRNA | let-7b      |
| t0008345 | 22 | 46 TGAGGTAGTAGGTTGTGTGTT       | miRNA | let-7b      |
| t0008431 | 22 | 46 TGAGGTAGTAGGTTGTGTGTTA      | miRNA | let-7a      |
| t0008318 | 24 | 46 TGAGGTAGTAGGTTGTATAGAATC    | miRNA | let-7-5p    |
| t0008430 | 22 | 46 TGAGTTAGTAGGTTGTATAGTT      | miRNA | let-7       |
| t0008486 | 22 | 46 GTTTGAGGTAGTAGGTTGTATA      | miRNA | let-7       |
| t0008329 | 22 | 45 TATTGCACTTGTCCCGGCTGTA      | miRNA | miR-92b     |
| t0008472 | 22 | 45 GGTGGGAGACTGTGAAGCGGTG      | miRNA | miR-920     |

|          |    |                                  |       |            |
|----------|----|----------------------------------|-------|------------|
| t0008474 | 20 | 45 TATTGCACTCGTCCCGGCAA          | miRNA | miR-92     |
| t0008353 | 23 | 45 TGAAGGCCGAAGTGGAGAAGGGT       | miRNA | miR-739    |
| t0008429 | 22 | 45 CACGCTCATGCACACCCACA          | miRNA | miR-574-3p |
| t0008502 | 26 | 45 TCCTGTAAGTACTGAGCTGCCCGAGCGCG | miRNA | miR-486-5p |
| t0008496 | 22 | 45 TCCTGTAAGTACTGAGCTGCCCGAG     | miRNA | miR-486-5p |
| t0008344 | 22 | 45 TCCTGTAAGTACTGAGTTGCCCGAT     | miRNA | miR-486-5p |
| t0008469 | 22 | 45 TCCTGTAAGTACTGAGCTGCCCGAG     | miRNA | miR-486-5p |
| t0008551 | 22 | 45 TACTAACTGCAGATCAAGTGA         | miRNA | miR-4637   |
| t0008549 | 19 | 45 GAGAGAAGGGTCGGGGCGG           | miRNA | miR-4516   |
| t0008497 | 22 | 45 TGAGGGTGTAGGTTGTGTGGTT        | miRNA | miR-4510   |
| t0008529 | 19 | 45 AAACCTTTACCATTACTGA           | miRNA | miR-451    |
| t0008629 | 28 | 45 AAACCGTTACCATTACTGAGTTGCCCGG  | miRNA | miR-451    |
| t0008846 | 21 | 45 ACCGTTACCATTACTGAGTAA         | miRNA | miR-451    |
| t0008786 | 22 | 45 ACAGGAGTGGGGGGTGGGACGT        | miRNA | miR-4433   |
| t0008866 | 23 | 45 ACTCCACTGCTTCACTTGACTA        | miRNA | miR-4301   |
| t0008586 | 19 | 45 AAGCATTGTACAGGGCTAT           | miRNA | miR-4289   |
| t0008593 | 24 | 45 TGAGGGGCAGAGAGCGAGACCTTG      | miRNA | miR-423-5p |
| t0008594 | 21 | 45 TAGGGGCAGAGAGCGAGACTT         | miRNA | miR-423-5p |
| t0008733 | 21 | 45 TGAGGGGCTGAGAGCGAGACT         | miRNA | miR-423-5p |
| t0008793 | 23 | 45 GCTGGACTTGGAGTCAGAAGGCA       | miRNA | miR-378    |
| t0008835 | 22 | 45 GAGGACTGAAGTGGGGAAAGGT        | miRNA | miR-3526   |
| t0008854 | 27 | 45 AACTTTGAAGGCCGAAGTGGAGAAGGG   | miRNA | miR-3526   |
| t0008644 | 21 | 45 TCTCACACAGAAATCGCACCC         | miRNA | miR-342-3p |
| t0008691 | 24 | 45 CAAAAGCTGGGTTGAGAGGGCGTA      | miRNA | miR-320d   |
| t0008820 | 24 | 45 AAAAGCTGGGTTGAGAGGGCGCAT      | miRNA | miR-320d   |
| t0008848 | 22 | 45 AAAAGCTAGGTTGAGAGGGCGA        | miRNA | miR-320a   |
| t0008712 | 24 | 45 GTGGAAGGTAGACGGCCAGAGAGA      | miRNA | miR-3190   |
| t0008682 | 21 | 45 TAGCAGCATCTGAAATCGGTT         | miRNA | miR-29d    |
| t0008706 | 22 | 45 AGGCGGAGACTTGGGCAATTGC        | miRNA | miR-25*    |
| t0008603 | 22 | 45 TTTCTATGCATATACTTCTTT         | miRNA | miR-202*   |
| t0008625 | 25 | 45 CAACGGAATCCAAAAGCAGCTGAT      | miRNA | miR-191    |
| t0008853 | 21 | 45 TGGAGAGGAAGGCAGTTCCTG         | miRNA | miR-185    |
| t0008842 | 21 | 45 TGGTCTGTAGAGGTCGGCCA          | miRNA | miR-1842   |
| t0008707 | 23 | 45 TAGCAGCACGTAATATTGGTGA        | miRNA | miR-16     |
| t0008741 | 24 | 45 TTTTAGCAGCACGTAATATTGG        | miRNA | miR-16     |
| t0008575 | 25 | 45 CATTAGCAGCACGTAATATTGGCG      | miRNA | miR-16     |
| t0008628 | 19 | 45 TCTCCCAACCCTTGTACCA           | miRNA | miR-150    |
| t0008845 | 21 | 45 ACCAAAGGGTAGAACCACGGA         | miRNA | miR-140    |
| t0008747 | 21 | 45 ACCACAGGGTTGAACCACGGA         | miRNA | miR-140    |
| t0008577 | 22 | 45 ACCACAGGGTAGAACAACGGAT        | miRNA | miR-140    |
| t0008718 | 20 | 45 CTGTGAGGTTGGCATTGTTG          | miRNA | miR-1294   |
| t0008704 | 23 | 45 TGTATGTGTATATATGTGTGA         | miRNA | miR-1187   |
| t0008830 | 23 | 45 AGCAGCATTGTACAGTGCTATGA       | miRNA | miR-103a   |
| t0008814 | 21 | 45 AGCAGCATTGTACAGGTCTAT         | miRNA | miR-103a   |
| t0008572 | 22 | 45 AGCAGAATTGTACAGGGCTATG        | miRNA | miR-103a   |
| t0008849 | 21 | 45 GCAGCATTGTACAGGGCTATG         | miRNA | miR-103a   |
| t0008583 | 22 | 45 GTACAGTACTGTGATAACTGAG        | miRNA | miR-101c   |
| t0008726 | 22 | 45 TACAGTACTGTGATAACTGTAG        | miRNA | miR-101    |
| t0008797 | 22 | 45 GTACATTACTGTGATAACTGAA        | miRNA | miR-101    |
| t0008836 | 21 | 45 AGTTGAGGTAGTAGATTGTAT         | miRNA | let-7f     |
| t0008571 | 23 | 45 AAGAGGTAGTAGGTTGCATAGTT       | miRNA | let-7d     |
| t0008652 | 21 | 45 TGAGGTAGTAGGTTGAGTGGT         | miRNA | let-7b     |
| t0008729 | 24 | 45 TGAGGTAGTAGGTTGTGTGGTATT      | miRNA | let-7b     |
| t0008642 | 23 | 45 TGAGGTAGAAGGTTGTGTGGTTA       | miRNA | let-7b     |
| t0008609 | 18 | 45 TGAGGTAGTAGGTATAGT            | miRNA | let-7a     |
| t0008614 | 18 | 45 TGAGGTAGTAGGTTATAG            | miRNA | let-7      |
| t0008627 | 19 | 44 ATTGCACTTGTTCCGGCCT           | miRNA | miR-92c    |
| t0008723 | 31 | 44 GAAGACTGAAGTGGAGAAGGGTTTCTTG  | miRNA | miR-739    |

|          |    |                                 |       |              |
|----------|----|---------------------------------|-------|--------------|
| t0008805 | 22 | 44 TCGAATCCCAGCGGTGCCTCCA       | miRNA | miR-5100     |
| t0008746 | 21 | 44 TCCTGTA CTGAGCTGCCATGA       | miRNA | miR-486-5p   |
| t0008592 | 25 | 44 TCCTGTA CTGAGCTGCCCGAGAAG    | miRNA | miR-486-5p   |
| t0008803 | 22 | 44 ATGGCCAGAGCTCACACAGAGA       | miRNA | miR-4435     |
| t0008626 | 20 | 44 TGGAGAGAAAGGCAGTTGTT         | miRNA | miR-4306     |
| t0008826 | 21 | 44 TGAGGGGCAGAGAGAGAGACA        | miRNA | miR-423-5p   |
| t0008610 | 21 | 44 TGAGGGGCAGAGAACGAGACT        | miRNA | miR-423-5p   |
| t0008653 | 24 | 44 TGAGGGGCAGAGAGCGAGAATTTT     | miRNA | miR-423-5p   |
| t0008816 | 22 | 44 TGAGAGGCAGAGAGCGAGACTT       | miRNA | miR-423-5p   |
| t0008674 | 23 | 44 TGAGGGGCACAGAGCGAGACTTT      | miRNA | miR-423-5p   |
| t0008584 | 23 | 44 CTGGA CTGGAGTCAGAAGGCAA      | miRNA | miR-378      |
| t0009138 | 25 | 44 TGAAGACTGAAGTGGAGAAGGGGTT    | miRNA | miR-3526     |
| t0008905 | 23 | 44 AAAAGCTGGGTTGAGACGGCGAA      | miRNA | miR-320a     |
| t0009129 | 23 | 44 TAAAGCTGGGTTGAGAGGGCGAT      | miRNA | miR-320a     |
| t0009036 | 23 | 44 TGTA AACATCCTCGACTGGAAGC     | miRNA | miR-30a-5p   |
| t0009158 | 24 | 44 TGTA AACATCCCCGACTGGAAGCA    | miRNA | miR-30a-5p   |
| t0009085 | 22 | 44 CATTGA ACTTGTCTCGGTCTGA      | miRNA | miR-25       |
| t0009098 | 21 | 44 AGTTCTTCAGTGGCAAGCTTT        | miRNA | miR-22*      |
| t0008942 | 28 | 44 TGACTGGGGCGGTACATCTGTAAATAT  | miRNA | miR-219-2-3p |
| t0008954 | 26 | 44 CAACGGAATCCCAAAGCAGCATAAA    | miRNA | miR-191      |
| t0008980 | 22 | 44 TGGTGAGAAAGGCAGTTCCTGA       | miRNA | miR-185      |
| t0009006 | 22 | 44 TAGCAGCACGTA AATATTTGCA      | miRNA | miR-16b      |
| t0009133 | 23 | 44 TAGCAGCACGTA AATATTGGAGA     | miRNA | miR-16       |
| t0009128 | 21 | 44 CTAGCAGCACGTA AATATTGG       | miRNA | miR-16       |
| t0009012 | 25 | 44 TAGCAGCACGTA AATATTGGCGTAA   | miRNA | miR-16       |
| t0008908 | 20 | 44 GGATATTATCATATACTGTA         | miRNA | miR-144*     |
| t0009068 | 21 | 44 CTACAGTATAGATGATGCACT        | miRNA | miR-144      |
| t0008896 | 27 | 44 TGAGATGAAGCACTGTAGCTCTTAATC  | miRNA | miR-143      |
| t0009057 | 23 | 44 TGAGATGAAGCACTGTAGCAATC      | miRNA | miR-143      |
| t0009050 | 27 | 44 ACCACAGGGTAGA ACCACGGACACCGG | miRNA | miR-140      |
| t0008976 | 23 | 44 TACCACAGGGTATA ACCACGGAA     | miRNA | miR-140      |
| t0009048 | 23 | 44 ACCACAGGGTATA ACCACGGACA     | miRNA | miR-140      |
| t0009149 | 24 | 44 TACCACAGGGTAGA ACCACGGACC    | miRNA | miR-140      |
| t0009077 | 21 | 44 GTACAGTACTCTGATAACTGA        | miRNA | miR-101      |
| t0009045 | 23 | 44 TCTGAGGTAGTAGTTTGTACAGT      | miRNA | let-7g       |
| t0009027 | 25 | 44 TGAGGTAGTAGATTGTATAGTCGGT    | miRNA | let-7f       |
| t0009037 | 20 | 44 AGAGGTACTAGGTTGCATAG         | miRNA | let-7d       |
| t0009071 | 22 | 44 AGAGGTAGTAGGATGCATAGTT       | miRNA | let-7d       |
| t0008990 | 20 | 44 TGAGGTAGTAGGTTGTATGT         | miRNA | let-7c       |
| t0008912 | 21 | 44 TGAGGTAGTAGGTTGTATGTT        | miRNA | let-7c       |
| t0008950 | 23 | 44 TGAGGTAGTAGGTTGTGTAGTTA      | miRNA | let-7b       |
| t0008952 | 22 | 44 TGAGGTAGTAGGTTGGTTGGTT       | miRNA | let-7b       |
| t0008881 | 20 | 44 TGAGGTACTAGGTTGTGTGG         | miRNA | let-7b       |
| t0008931 | 26 | 44 TGAGGTAGTAGGTTGTATGGTAAATC   | miRNA | let-7-5p     |
| t0008953 | 21 | 44 TGTGGTAGTAGGTTGTATAGT        | miRNA | let-7        |
| t0009030 | 26 | 43 AACCCGTAGATCCGA ACTTGTGTATC  | miRNA | miR-99a      |
| t0008961 | 21 | 43 TGA ACTGATAGATACTCGGCT       | miRNA | miR-996      |
| t0008987 | 22 | 43 TATTGCACTCGTCCCGGCCATA       | miRNA | miR-92       |
| t0008887 | 22 | 43 TATTGCACTCGTCCCGGCCAAT       | miRNA | miR-92       |
| t0009019 | 22 | 43 TGGAAGACTGGTGATATGTTGT       | miRNA | miR-7-5p     |
| t0009151 | 27 | 43 AAGTTGGATTGTGACTGGCAAGTGGA   | miRNA | miR-753c     |
| t0008909 | 22 | 43 TTCTAGTAAGAGTGGCAGTCCA       | miRNA | miR-628-3p   |
| t0008979 | 21 | 43 ATTCTAATTTCTCCACGTCTT        | miRNA | miR-576-5p   |
| t0008882 | 19 | 43 AACCA CAATTACTTTTGCA         | miRNA | miR-548aa    |
| t0008956 | 22 | 43 CCTCCCACTTAAGGCTTGCA         | miRNA | miR-532-3p   |
| t0009020 | 21 | 43 TCATGTA CTGAGCTGCCCGA        | miRNA | miR-486-5p   |
| t0009118 | 22 | 43 CCCTGTA CTGAGCTGCCCGAG       | miRNA | miR-486-5p   |
| t0009101 | 27 | 43 TCCTGTA CTGAGCTGCCCGAGTAGGA  | miRNA | miR-486-5p   |

|          |    |            |          |               |            |             |           |
|----------|----|------------|----------|---------------|------------|-------------|-----------|
| t0009170 | 22 | 43 TCCTGTA | CTGAGCTG | CCCCGGA       | miRNA      | miR-486-5p  |           |
| t0009356 | 21 | 43 TAGATGT | AGGATTGT | GTCGGT        | miRNA      | miR-4860    |           |
| t0009279 | 23 | 43 TGTAGAG | CAGGGAGT | AGGAAGCT      | miRNA      | miR-4732-5p |           |
| t0009399 | 25 | 43 AGGCTGG | GTCGGT   | CGGGCTGGGGCG  | miRNA      | miR-4651    |           |
| t0009330 | 22 | 43 TAGTGCA | ATATTGCT | TATAGGG       | miRNA      | miR-454     |           |
| t0009162 | 25 | 43 AAACCGT | TACCATT  | ACTGAGTTTGA   | miRNA      | miR-451     |           |
| t0009228 | 21 | 43 AAACCGT | TACCCTT  | ACTGAGT       | miRNA      | miR-451     |           |
| t0009205 | 21 | 43 TCCCACT | GCTTCACT | TGACTA        | miRNA      | miR-4301    |           |
| t0009409 | 22 | 43 TGAGGGG | CAGAGAG  | CGAGACCT      | miRNA      | miR-423-5p  |           |
| t0009281 | 22 | 43 TGAGGGG | CAGAGAG  | CGAGACTG      | miRNA      | miR-423-5p  |           |
| t0009172 | 22 | 43 TGAGGGG | CAGAGAG  | CGAGAGTT      | miRNA      | miR-423-5p  |           |
| t0009288 | 20 | 43 TGAGGGG | CAGAGAG  | CGAGTT        | miRNA      | miR-423-5p  |           |
| t0009379 | 22 | 43 TGAGGGG | CAGAAAG  | CGAGACTT      | miRNA      | miR-423-5p  |           |
| t0009407 | 27 | 43 ACTGGAC | TGGGGT   | CAGAAGGCATATC | miRNA      | miR-378     |           |
| t0009262 | 20 | 43 CCGGGGG | TGGGGT   | CGGCGGG       | miRNA      | miR-3621    |           |
| t0009372 | 23 | 43 AAAAGCT | GCGTTG   | AGAGGGCGTT    | miRNA      | miR-320d    |           |
| t0009422 | 22 | 43 AAAAGCT | GGGGTG   | AGAGGGCGT     | miRNA      | miR-320d    |           |
| t0009333 | 21 | 43 AAAAGCT | GGGTTG   | AGAGGGCT      | miRNA      | miR-320d    |           |
| t0009174 | 22 | 43 GAAAGCT | GGGTTG   | AGAGGGCGA     | miRNA      | miR-320a    |           |
| t0009342 | 22 | 43 AAAAGCT | CGTTG    | AGAGGGCGA     | miRNA      | miR-320a    |           |
| t0009483 | 23 | 43 AAAAGCT | GCGTTG   | AGAGGGCGAT    | miRNA      | miR-320a    |           |
| t0009185 | 26 | 43 CTGGA   | AAAGCTGG | GTTGAGAGGGCGA | miRNA      | miR-320a    |           |
| t0009192 | 22 | 43 AAAAGCT | GGGTTT   | AGAGGGCGA     | miRNA      | miR-320a    |           |
| t0009210 | 22 | 43 AAAAGG  | TGGTTG   | AGAGGGCGA     | miRNA      | miR-320a    |           |
| t0009289 | 23 | 43 AAAGCT  | GGGTTG   | AGAGGGCGATG   | miRNA      | miR-320a    |           |
| t0009428 | 22 | 43 AAAAGCT | GGGTTG   | GGGAGGGCGA    | miRNA      | miR-320a    |           |
| t0009360 | 24 | 43 TTCAAG  | TAATCC   | AGGATAGGCAGA  | miRNA      | miR-26a     |           |
| t0009294 | 22 | 43 TTCCT   | ATGCAT   | ATACTTCTTTG   | miRNA      | miR-202-5p  |           |
| t0009335 | 23 | 43 TGTGCA  | AATCTAT  | GCAAACTGA     | miRNA      | miR-19a     |           |
| t0009373 | 23 | 43 TAACGG  | AATCCC   | AAAAGCAGCTG   | miRNA      | miR-191     |           |
| t0009501 | 18 | 43 TGGAG   | AGAAAG   | GCAGTGA       | miRNA      | miR-185     |           |
| t0009171 | 22 | 43 AGGTAG  | ATAGAAC  | AGGTTTTGT     | miRNA      | miR-1839    |           |
| t0009195 | 25 | 43 ATGGC   | ACTGGT   | AGAAATTC      | ACTGTAC    | miRNA       | miR-183   |
| t0009208 | 23 | 43 TAGGG   | ACGGG    | AGCGCG        | CGGGGA     | miRNA       | miR-1763  |
| t0009332 | 26 | 43 AAAAT   | AGCAG    | CATGTAA       | ATTGGCG    | miRNA       | miR-16    |
| t0009426 | 21 | 43 CTAGC   | AGCAC    | ATCATG        | GTTTA      | miRNA       | miR-15b   |
| t0009447 | 20 | 43 CAGCA   | GCAC     | ATCATG        | GTTTA      | miRNA       | miR-15b   |
| t0009466 | 18 | 43 GCAGC   | ACAT     | CATG          | GTTTA      | miRNA       | miR-15b   |
| t0009485 | 21 | 43 CCCAT   | AAAGT    | AGAAAG        | CATTA      | miRNA       | miR-142   |
| t0009175 | 23 | 43 ACCAC   | AGGGT    | AGAA          | TACGGACA   | miRNA       | miR-140   |
| t0009402 | 20 | 43 TCAC    | AGGGT    | AGAA          | ACCACGGA   | miRNA       | miR-140   |
| t0009223 | 20 | 43 ACAC    | AGGGT    | AGAA          | ACCACGGA   | miRNA       | miR-140   |
| t0009217 | 23 | 43 TAAC    | ACAGG    | TAGAA         | ACCACGGAC  | miRNA       | miR-140   |
| t0009190 | 21 | 43 ATCCC   | ACCG     | CTGCC         | ACCAAGA    | miRNA       | miR-1260b |
| t0009234 | 20 | 43 TAAAG   | TGCTG    | ACAGT         | GCCGA      | miRNA       | miR-106b  |
| t0009182 | 27 | 43 AGCAG   | CATTGT   | ACAGG         | CTATGAACTC | miRNA       | miR-103a  |
| t0009448 | 24 | 43 AAAA    | AGCAG    | CATTGT        | ACAGGGCTA  | miRNA       | miR-103a  |
| t0009218 | 21 | 43 AGCAG   | CATTGT   | AAAGG         | CTAT       | miRNA       | miR-103a  |
| t0009191 | 21 | 43 AGCAG   | CATTGT   | ACACG         | CTAT       | miRNA       | miR-103a  |
| t0009397 | 23 | 43 TGA     | AATGTA   | AAGA          | AGTGTGTATC | miRNA       | miR-1     |
| t0009424 | 20 | 43 TTAGG   | TAGT     | AGTTT         | GTGCTT     | miRNA       | let-7i    |
| t0009361 | 22 | 43 CGAGG   | TAGT     | AGTT          | GTATTGTT   | miRNA       | let-7f    |
| t0009227 | 19 | 43 TGAGG   | TACT     | AGATT         | GTATA      | miRNA       | let-7f    |
| t0009337 | 22 | 43 AGAGG   | TAGT     | AGTT          | GCATAGAA   | miRNA       | let-7d    |
| t0009417 | 24 | 43 TGAGG   | TAGT     | AGTT          | GTGTGTGTTA | miRNA       | let-7b    |
| t0009502 | 22 | 43 TGAGG   | TAGT     | AGTT          | GTGTGGGA   | miRNA       | let-7b    |
| t0009229 | 22 | 43 TGAGG   | TGT      | AGTT          | GTGTGTT    | miRNA       | let-7b    |
| t0009198 | 24 | 43 TGAGG   | TAGT     | AGTT          | GTATGGTTAG | miRNA       | let-7b    |

|          |    |                                 |       |             |
|----------|----|---------------------------------|-------|-------------|
| t0009194 | 20 | 43 TGAGGTAGTAGGTTGTATAT         | miRNA | let-7       |
| t0009302 | 22 | 43 TGAAGTAGTAGGTTGTATAGTT       | miRNA | let-7       |
| t0009452 | 21 | 43 TGAGGTAGTAGGTTGTATAGC        | miRNA | let-7       |
| t0009458 | 21 | 43 TGAGATAGTAGGTTGTATAGT        | miRNA | let-7       |
| t0009353 | 22 | 43 TGAGGTTGTAGGTTGTATAGTT       | miRNA | let-7       |
| t0009470 | 19 | 42 CAAAGTGCTGTTCGTGCAG          | miRNA | miR-93      |
| t0009273 | 25 | 42 TGAAGATTGAAGTGGAGAAGGGTTT    | miRNA | miR-739     |
| t0009491 | 22 | 42 TCTGGAGACGGAACTCCACAGA       | miRNA | miR-5114    |
| t0009410 | 21 | 42 TCCTGTACTGATCTGCCCCGA        | miRNA | miR-486-5p  |
| t0009271 | 22 | 42 TCCCGTACTGAGCTGCCCCGAG       | miRNA | miR-486-5p  |
| t0009280 | 20 | 42 TCCTGTACTTAGCTGCCCCG         | miRNA | miR-486-5p  |
| t0009303 | 28 | 42 TCCTGTACTGAGCTGCCCCGAAGCTCGG | miRNA | miR-486-5p  |
| t0009377 | 25 | 42 TCCTGTACTGAGCTGCCCCGAGTCC    | miRNA | miR-486-5p  |
| t0009253 | 27 | 42 TCCTGTACTGAGCTGCCCCGAGCTGCT  | miRNA | miR-486-5p  |
| t0009306 | 23 | 42 TCCTGTACTGAGCTGCCCCGAAG      | miRNA | miR-486-5p  |
| t0009418 | 26 | 42 TGTAGAGCAGGGAGCAGGAAGCTGAA   | miRNA | miR-4732-5p |
| t0009435 | 23 | 42 ATTCGACTCTGGATAGCTGGTAT      | miRNA | miR-4538    |
| t0009460 | 21 | 42 AAACCTTACCATTACTGAGTT        | miRNA | miR-451     |
| t0009802 | 21 | 42 AAACCTTACTATTACTGAGT         | miRNA | miR-451     |
| t0009619 | 23 | 42 TGGAGAGAAAGGCAGTAGTTGAT      | miRNA | miR-4306    |
| t0009522 | 22 | 42 TTGAGGGGCAGAGAGCGAGACT       | miRNA | miR-423-5p  |
| t0009532 | 24 | 42 TGAAGTACTGAGGTTGAGAGGCGT     | miRNA | miR-3491    |
| t0009564 | 22 | 42 AAAAGCTGGTTTGAGAGGGCGT       | miRNA | miR-320d    |
| t0009618 | 25 | 42 GAAAAGCTGGGTTGAGAGGGCGTAT    | miRNA | miR-320d    |
| t0009653 | 21 | 42 AAAAGCTGGGTTGAGAGGGTT        | miRNA | miR-320d    |
| t0009659 | 23 | 42 AAAAGCTGGGTTGAGAGGGAGTA      | miRNA | miR-320d    |
| t0009699 | 24 | 42 AAAGCTGGGTTGAGAGGGCGTATT     | miRNA | miR-320d    |
| t0009792 | 22 | 42 AAAAGCCGGGTTGAGAGGGCGA       | miRNA | miR-320a    |
| t0009524 | 23 | 42 TTCTGGGAGGTTGTAGCAGTGGA      | miRNA | miR-3192    |
| t0009683 | 22 | 42 TGTAACATCCTACACTCAGCG        | miRNA | miR-30b     |
| t0009806 | 21 | 42 TAGCACCATTTGAAATCAGTG        | miRNA | miR-29b     |
| t0009837 | 24 | 42 TTCAAGTAATTCAGGATAGGTAGA     | miRNA | miR-26b     |
| t0009775 | 24 | 42 AATTCAGTAATCCAGGATAGGCT      | miRNA | miR-26a     |
| t0009692 | 19 | 42 AGGCGGAGACTTGGGCAAT          | miRNA | miR-25*     |
| t0009673 | 22 | 42 CATTGCACTTGTCTCGGTCTCA       | miRNA | miR-25      |
| t0009517 | 20 | 42 TGGCTCAGTTCAGCAGGAAC         | miRNA | miR-24      |
| t0009542 | 24 | 42 TGGCTCAGTTCAGCAGGAACAGTG     | miRNA | miR-24      |
| t0009544 | 23 | 42 AAGCTGCCAGTTGAAGAAGTGT       | miRNA | miR-22-3p   |
| t0009549 | 25 | 42 TAGGTAGTTTCTGTTGTTGGGATC     | miRNA | miR-196b    |
| t0009708 | 23 | 42 AACGGAATTCTAAAAGCAGCTGA      | miRNA | miR-191     |
| t0009742 | 20 | 42 CAAAGAATTCTCCTTTTGA          | miRNA | miR-186     |
| t0009737 | 23 | 42 TGGAGAAAAAGGCAGTTCCTGAA      | miRNA | miR-185     |
| t0009644 | 21 | 42 TGGAGAGAAAGGCAGGTCCTG        | miRNA | miR-185     |
| t0009685 | 21 | 42 TGGAGAGAAAGGCAGTTCCTG        | miRNA | miR-185     |
| t0009694 | 20 | 42 TGGACGGAGAAGTATAGGG          | miRNA | miR-184     |
| t0009565 | 20 | 42 AACATTCATGCTGTCGGTG          | miRNA | miR-181a    |
| t0009666 | 23 | 42 TAGCAGCACGTAAATATTTGTT       | miRNA | miR-16b     |
| t0009815 | 20 | 42 GCAGCACGTAAATATTTGCA         | miRNA | miR-16b     |
| t0009671 | 20 | 42 TAGCAGCACTTCATGGTTTA         | miRNA | miR-15b     |
| t0009814 | 20 | 42 TAGCAGCACATCATGGTTAA         | miRNA | miR-15b     |
| t0009768 | 20 | 42 TAGCAGCACATCATGGTTTA         | miRNA | miR-15b     |
| t0009665 | 20 | 42 TAGCAGCACATCATGGTTTA         | miRNA | miR-15b     |
| t0009612 | 20 | 42 TAGCAGCGCATAATGGTTTG         | miRNA | miR-15a     |
| t0009749 | 18 | 42 TCAGTGCCTACAGAACT            | miRNA | miR-148a    |
| t0009622 | 21 | 42 TACAGTATAGATGATGTTCTA        | miRNA | miR-144     |
| t0009660 | 18 | 42 TACAGTATAGATGATGTG           | miRNA | miR-144     |
| t0009767 | 21 | 42 TGTAGTGTTCCTACTTTATG         | miRNA | miR-142-3p  |
| t0009552 | 23 | 42 TACCACAGGGTAGAATCACGGAT      | miRNA | miR-140     |



|          |    |                                     |       |             |
|----------|----|-------------------------------------|-------|-------------|
| t0009574 | 22 | 42 ACCACAGTGTAGAACCACGGAA           | miRNA | miR-140     |
| t0009623 | 22 | 42 CCACAGGGTAGAACCACGGAAG           | miRNA | miR-140     |
| t0009624 | 21 | 42 ACGACAGGGTAGAACCACGGA            | miRNA | miR-140     |
| t0009534 | 23 | 42 TACTACAGGGTAGAACCACGGAC          | miRNA | miR-140     |
| t0009558 | 20 | 42 ATTTTAGAGACGGGGTTTTG             | miRNA | miR-1303    |
| t0009787 | 22 | 42 TCCCTGAGACCCTTTAACCTGT           | miRNA | miR-125a    |
| t0009839 | 21 | 42 CGGATGAGCAAAGAAAGTGGT            | miRNA | miR-1255b   |
| t0009641 | 18 | 42 CGGGTTAGGTTCTTGTAG               | miRNA | miR-125*    |
| t0009834 | 22 | 42 AGCAGCATTGTACAAGGCTATG           | miRNA | miR-103a    |
| t0009604 | 22 | 42 AGCAGCATTGCACAGGGCTATG           | miRNA | miR-103a    |
| t0009629 | 21 | 42 AGCAGCATTGACTGGGCTAT             | miRNA | miR-103a    |
| t0009700 | 24 | 42 TACAGTACTGTGATAACTGATGGC         | miRNA | miR-101c    |
| t0009563 | 21 | 42 TACAGTACTGCGATAACTGAA            | miRNA | miR-101     |
| t0009567 | 21 | 42 GTACAGTGTGTGATAACTGA             | miRNA | miR-101     |
| t0009667 | 23 | 42 TGAGGTAGTAGTTTGTGCTGTAG          | miRNA | let-7i      |
| t0009821 | 22 | 42 TGAGGTAGTAGTTTGTGCTTTT           | miRNA | let-7i      |
| t0009832 | 26 | 42 CGAGGTAGTAGTTTGTACAGTTTATC       | miRNA | let-7g      |
| t0009621 | 22 | 42 TGAGGTAGTAGTTTATACAGTT           | miRNA | let-7g      |
| t0009723 | 25 | 42 TGAGGTAGTAGATTGTATAGTTGTC        | miRNA | let-7f      |
| t0009703 | 20 | 42 TGAGGTAGTAGAATGTATAG             | miRNA | let-7f      |
| t0009551 | 21 | 42 TGAGGTAGTAGAGTGTATAGT            | miRNA | let-7f      |
| t0009709 | 18 | 42 TGGTAGTAGATTGTATAG               | miRNA | let-7f      |
| t0009745 | 25 | 42 AGAGGTAGTAGGTTGCATAGTTATC        | miRNA | let-7d      |
| t0009805 | 22 | 42 AGAGGAAGTAGGTTGCATAGTT           | miRNA | let-7d      |
| t0009602 | 24 | 42 TGAGGTAGTAGGTTCTGTGGTTAA         | miRNA | let-7b      |
| t0009679 | 22 | 42 CTGAGGTAGTAGGTTGTGTGGT           | miRNA | let-7b      |
| t0009764 | 25 | 42 TGAGGTAGTAGGTTGTGTGGTAATC        | miRNA | let-7b      |
| t0009662 | 22 | 42 TGAGGTAATAGGTTGTATAGTT           | miRNA | let-7       |
| t0009830 | 22 | 41 AGGGACGGGACGCGGTGCAGTT           | miRNA | miR-92b*    |
| t0009507 | 19 | 41 TATTGCACTCGTCCCGGCA              | miRNA | miR-92      |
| t0009598 | 22 | 41 TGGAAGACTAGTGATTTTGTTG           | miRNA | miR-7       |
| t0009506 | 20 | 41 TACGTCATCATTGTCATCGT             | miRNA | miR-598     |
| t0009508 | 21 | 41 AAAAGTAATTGCGTTTTTGA             | miRNA | miR-548ak   |
| t0009529 | 23 | 41 TCTGGGCGCAGGCGGATGGACAG          | miRNA | miR-5107    |
| t0009595 | 22 | 41 TCCTGTAAGTACTGAGCTGCTCCGAA       | miRNA | miR-486-5p  |
| t0009540 | 22 | 41 TCCTGTAAGTACTGAGCTGCCCGGC        | miRNA | miR-486-5p  |
| t0009758 | 22 | 41 TCCTGTAAGTACTGAGCTGCCCAAG        | miRNA | miR-486-5p  |
| t0009512 | 22 | 41 TCATGTAAGTACTGAGCTGCCCGAG        | miRNA | miR-486-5p  |
| t0009702 | 23 | 41 TCCTGTAAGTACTGAGCTGCCCTGAGG      | miRNA | miR-486-5p  |
| t0009829 | 29 | 41 TCCTGTAAGTACTGAGCTGCCCGAGACGACCT | miRNA | miR-486-5p  |
| t0009800 | 20 | 41 GAGACGGGTCGGGGCGTGCG             | miRNA | miR-4516    |
| t0010144 | 23 | 41 TGAGGGAGTAGGTTGTGTGGTTT          | miRNA | miR-4510    |
| t0010072 | 22 | 41 AAACCGTTACCGTTACTGAGTT           | miRNA | miR-451     |
| t0009871 | 26 | 41 ACTCCCACTGCTTCACTTGACTAGCC       | miRNA | miR-4301    |
| t0010174 | 19 | 41 CAAAACGTGAGGCGCTGCT              | miRNA | miR-424*    |
| t0009952 | 22 | 41 TGAGGGACAGAGAGCGAGACTT           | miRNA | miR-423-5p  |
| t0010097 | 27 | 41 TGAGGGGACAGAGAGCGAGACTTTAGGT     | miRNA | miR-423-5p  |
| t0009858 | 23 | 41 TGAGGGGCCAGAGAGCGAGACTTT         | miRNA | miR-423-5p  |
| t0009900 | 26 | 41 ACTGGACTTGGAGTCAGAAGGTAATC       | miRNA | miR-378     |
| t0010051 | 25 | 41 ACTGGACTTGGACTCAGAAGGCATC        | miRNA | miR-378     |
| t0010083 | 21 | 41 AATTGCACGGTATCCATCTTT            | miRNA | miR-363     |
| t0010093 | 21 | 41 TGAAGACTGAAGTGGAGAAGA            | miRNA | miR-3526    |
| t0010099 | 23 | 41 AAAAGCTGGGTTGAGAGGGGGAA          | miRNA | miR-320d    |
| t0009938 | 22 | 41 AAAAGCTGGGTTGAGAAGGCGA           | miRNA | miR-320a    |
| t0010175 | 21 | 41 AAAAGCTGGTTTGGAGAGGGCG           | miRNA | miR-320a    |
| t0009991 | 24 | 41 AAAGCTGGGTTGAGAGGGCGAAAA         | miRNA | miR-320a    |
| t0009930 | 20 | 41 AGCTTTTGGGAATTCAGGTA             | miRNA | miR-3140-3p |
| t0010025 | 26 | 41 TTCAAGTAATCCAGGATAGGCAGATC       | miRNA | miR-26a     |

|          |    |                                  |       |             |
|----------|----|----------------------------------|-------|-------------|
| t0010029 | 20 | 41 TGGGTTCTGGCATGCTGAT           | miRNA | miR-23b*    |
| t0010125 | 26 | 41 TTGGGAAACGGCCGCTGAGTGAGAA     | miRNA | miR-2110    |
| t0010163 | 23 | 41 CTGTGCGTGTGACAGCGGCTGAA       | miRNA | miR-210     |
| t0010031 | 22 | 41 TACTGTAGTATGGGCACTTTTT        | miRNA | miR-20b*    |
| t0010078 | 23 | 41 TTCACCACCTTCTCCACCCAGCA       | miRNA | miR-197     |
| t0009911 | 23 | 41 AACGGAATCTCAAAGCAGCTGA        | miRNA | miR-191     |
| t0009889 | 22 | 41 TGGAGAGAAAAGGAGTTCCTGA        | miRNA | miR-185     |
| t0009925 | 23 | 41 TGGAGAGAAAAGGAAGTTCCTGAG      | miRNA | miR-185     |
| t0009874 | 21 | 41 TGGAGAGAAAAGGTAGTTCCTG        | miRNA | miR-185     |
| t0010037 | 20 | 41 AGCAGCACATAATGGTTTGT          | miRNA | miR-15a     |
| t0010090 | 24 | 41 AAATAGCAGCACATAATGGTTTGT      | miRNA | miR-15a     |
| t0010095 | 20 | 41 TAGCAGTACATAATGGTTTGT         | miRNA | miR-15a     |
| t0010080 | 22 | 41 TCAGTGCATGACAGAACTTGGA        | miRNA | miR-152     |
| t0009855 | 20 | 41 TCTCAACCCTTGTACCAGTG          | miRNA | miR-150     |
| t0010055 | 20 | 41 CCCATAAAGTAGAAAGCCCT          | miRNA | miR-142     |
| t0010004 | 21 | 41 TACCACAGGGTAGAACCAGGA         | miRNA | miR-140     |
| t0009861 | 23 | 41 TACCAGAGGGTAGAACCACGGAC       | miRNA | miR-140     |
| t0009881 | 25 | 41 ACCACAGGGTAGAACCACGGACGGC     | miRNA | miR-140     |
| t0010180 | 21 | 41 TACCACAGCGTAGAACCACGG         | miRNA | miR-140     |
| t0009863 | 22 | 41 ACCACAGGGTAGAACCAGGGAA        | miRNA | miR-140     |
| t0009950 | 21 | 41 ACCACAGGGTAGAGCCACGGA         | miRNA | miR-140     |
| t0009989 | 22 | 41 TACCACAGGGTAGAAATACGGA        | miRNA | miR-140     |
| t0009877 | 24 | 41 ACCACAGGGTAGAACCACGGAGAA      | miRNA | miR-140     |
| t0010014 | 23 | 41 TCCCTGAGACCCTAACTTGTGAA       | miRNA | miR-125b-5p |
| t0010028 | 23 | 41 CCGCACTGTGGGTACTTGCTGCA       | miRNA | miR-106b*   |
| t0010011 | 21 | 41 ACCCTGTAGATCCGAATTTGT         | miRNA | miR-10-5p   |
| t0009957 | 22 | 41 AGCAGCATTGTAAAGGGCTATG        | miRNA | miR-103a    |
| t0010102 | 22 | 41 AGCAGCATTGTACAGGGCTCTG        | miRNA | miR-103a    |
| t0009867 | 22 | 41 ACAGTACTGTGATAACTGAAGA        | miRNA | miR-101c    |
| t0009878 | 21 | 41 ACAGTACTGTGATAACTGAAA         | miRNA | miR-101c    |
| t0009993 | 21 | 41 GTACAGTACTTTGATAACTGA         | miRNA | miR-101     |
| t0010036 | 29 | 41 GTACAGTACTGTGATAACTGAACTCTGAA | miRNA | miR-101     |
| t0010128 | 22 | 41 GTATAGTACTGTGATAACTGAA        | miRNA | miR-101     |
| t0010130 | 22 | 41 TGCGGTAGTAGTTTGTACAGTT        | miRNA | let-7g      |
| t0010145 | 20 | 41 TGAGGTAGTAGATTGTATCT          | miRNA | let-7f-5p   |
| t0010146 | 18 | 41 AGGTAGTAGATTGTATAG            | miRNA | let-7f      |
| t0009951 | 20 | 41 AGGTAGTAGATTGTATAGTG          | miRNA | let-7f      |
| t0010166 | 21 | 41 TGAGGTAGTAGATTGTACGGT         | miRNA | let-7f      |
| t0010139 | 18 | 41 GAGGTAGTAGGTTGCATA            | miRNA | let-7d      |
| t0009954 | 27 | 41 TGAGGTAGTAGGTTGTGTGGTTTTATC   | miRNA | let-7b      |
| t0010016 | 21 | 41 TTGAGGTAGTAGGTTGTGTGG         | miRNA | let-7b      |
| t0009849 | 22 | 41 TGAGGTAGTAGGTTGTGGGGTA        | miRNA | let-7b      |
| t0010106 | 24 | 40 AACCCGTAGATCCGATCTTGATC       | miRNA | miR-99a     |
| t0009984 | 21 | 40 TATACAACTTACTACTTTCCG         | miRNA | miR-98*     |
| t0010069 | 22 | 40 TATTGCACTTGTCCCGGCCAAA        | miRNA | miR-92      |
| t0010152 | 22 | 40 TCCATTACACTACCCTGCCTCT        | miRNA | miR-885-5p  |
| t0009979 | 20 | 40 TGCGGGGCTAGGGCTAACAG          | miRNA | miR-744     |
| t0009972 | 22 | 40 GAAGACTGAAGTGGATAAGGGT        | miRNA | miR-739     |
| t0009915 | 22 | 40 TGAAAGACGATGGTAGTGAGAT        | miRNA | miR-71      |
| t0009919 | 22 | 40 ATTATGGTTTGCCTGGGACTGA        | miRNA | miR-584     |
| t0010027 | 20 | 40 CAAAAGTGATCGTGGTTTTT          | miRNA | miR-548t    |
| t0010109 | 20 | 40 CTCCCCACACCCAAGGCTTG          | miRNA | miR-532-3p  |
| t0009880 | 22 | 40 TCCTGTACTGAACTGCCCCGAG        | miRNA | miR-486-5p  |
| t0010012 | 23 | 40 TCCTGTACTGAGCTGACCCGAGA       | miRNA | miR-486-5p  |
| t0010183 | 23 | 40 TCCTGTACTGAGCTGTTCCGAGT       | miRNA | miR-486-5p  |
| t0010511 | 26 | 40 TCCTGTACTGAGCTGCCCCGAGTTAG    | miRNA | miR-486-5p  |
| t0010215 | 21 | 40 TGACGTACAGAGGCTTCGCG          | miRNA | miR-4757-3p |
| t0010388 | 24 | 40 AAACCGTTACCATTACTGAGTCGG      | miRNA | miR-451     |

|          |    |                                 |       |             |
|----------|----|---------------------------------|-------|-------------|
| t0010516 | 22 | 40 AACCGTTACCATTACTGAGTTA       | miRNA | miR-451     |
| t0010416 | 22 | 40 AAACCGTTACCATTGCTGAGTT       | miRNA | miR-451     |
| t0010308 | 19 | 40 AAATCGTTACCATTACTGA          | miRNA | miR-451     |
| t0010338 | 19 | 40 CTCCCACTGCTTCACTTGA          | miRNA | miR-4301    |
| t0010393 | 19 | 40 TGAGGGGCAGACAGCGAGA          | miRNA | miR-423-5p  |
| t0010246 | 21 | 40 TGAGGGGCAAAGAGCGAGACT        | miRNA | miR-423-5p  |
| t0010351 | 22 | 40 TTAGGTAGTAGTTTGTACAGTT       | miRNA | miR-3962    |
| t0010207 | 21 | 40 AGGGACTTTCAGGGGCAGCTG        | miRNA | miR-365*    |
| t0010244 | 26 | 40 CTTTGAGGACTGAAGTGGGGAAAGGT   | miRNA | miR-3526    |
| t0010405 | 23 | 40 TCTCACACAGAAATCGCCCCGT       | miRNA | miR-342-3p  |
| t0010478 | 22 | 40 TCTCACACAGAAATCGCCCCG        | miRNA | miR-342-3p  |
| t0010242 | 24 | 40 TTCCACACAGAAATCGCACCCGTC     | miRNA | miR-342-3p  |
| t0010196 | 21 | 40 AAAAGCTGGGTTGAGAGGGAT        | miRNA | miR-320d    |
| t0010270 | 23 | 40 AAAAGCTGGGTTGAGATGGCGTT      | miRNA | miR-320d    |
| t0010331 | 24 | 40 AAAAGCTGGGTTGAGATGGCGAAA     | miRNA | miR-320a    |
| t0010369 | 22 | 40 AAAAGCTGGGTCGAGAGGGCGA       | miRNA | miR-320a    |
| t0010394 | 21 | 40 TCTGGGAGGTTGTAGCAGTGG        | miRNA | miR-3192    |
| t0010190 | 23 | 40 TAGCACCATTTGAAATCAGTGTT      | miRNA | miR-29b     |
| t0010377 | 23 | 40 CATTGCACTTGTCTCGGTCTGGA      | miRNA | miR-25      |
| t0010306 | 27 | 40 CATTGCACTTGTCTCGGTCTGGCGGGC  | miRNA | miR-25      |
| t0010265 | 23 | 40 TGGCTCAGTTCAGCAGGAACATC      | miRNA | miR-24b     |
| t0010238 | 22 | 40 GCTCAGTTCAGCAGGAACAGGA       | miRNA | miR-24b     |
| t0010197 | 20 | 40 TGAGGTAGTGTGTGTGGTAA         | miRNA | miR-1961    |
| t0010381 | 22 | 40 CAACGGAATCCAAAAAGCAGCT       | miRNA | miR-191     |
| t0010460 | 23 | 40 CAACGGATTCCAAAAGCAGCTG       | miRNA | miR-191     |
| t0010230 | 20 | 40 TGGATAGAAAGGCAGTTCCT         | miRNA | miR-185     |
| t0010358 | 19 | 40 TGGAGAGAAAGGCAGTTTG          | miRNA | miR-185     |
| t0010352 | 23 | 40 TGGAGAGAAAGGCAGTTCGAT        | miRNA | miR-185     |
| t0010454 | 24 | 40 ATAGCAGCACATCATGGTTTACAA     | miRNA | miR-15b     |
| t0010259 | 24 | 40 TAGCAGCACATCATGGTTTAAAAA     | miRNA | miR-15b     |
| t0010314 | 21 | 40 TAGCAGCACATAATGGTTGTG        | miRNA | miR-15a     |
| t0010293 | 25 | 40 TCAGTGCCTACAGAACTTTGGTAG     | miRNA | miR-148a    |
| t0010501 | 21 | 40 TACAGTATAGATGATGTTTTT        | miRNA | miR-144     |
| t0010375 | 22 | 40 TACCACAGGGTAGAACCACGCA       | miRNA | miR-140     |
| t0010380 | 23 | 40 CCACAGGGTAGAACCACGGAGGA      | miRNA | miR-140     |
| t0010299 | 22 | 40 TACCACAGGGTAGAGCCACGGA       | miRNA | miR-140     |
| t0010237 | 22 | 40 ACCACAGGGTAGAAACACGGAA       | miRNA | miR-140     |
| t0010323 | 22 | 40 AGCCTGGAAGCTGGAGCCTGCA       | miRNA | miR-1254    |
| t0010210 | 21 | 40 CCTTCCCACCTCTCCTGCA          | miRNA | miR-1224-3p |
| t0010297 | 25 | 40 AGCAGCATTGTACAGGGCTATGTAA    | miRNA | miR-103a    |
| t0010428 | 22 | 40 AAAGCAGCATTGTACAGGGCTA       | miRNA | miR-103a    |
| t0010239 | 24 | 40 GTACAGTACTGTGATAACTGAAAA     | miRNA | miR-101     |
| t0010400 | 22 | 40 TGAGGTAGTGGTTTGTACAGTT       | miRNA | let-7g      |
| t0010203 | 19 | 40 TGAGGTAGTAGATTGTCTA          | miRNA | let-7f      |
| t0010220 | 20 | 40 AGAGGTAGTTGGTTGCATAG         | miRNA | let-7d      |
| t0010452 | 20 | 40 TGAGGTAGCAGGTTGTGTGG         | miRNA | let-7b      |
| t0010349 | 24 | 40 TGAAGTAGTAGTTGTGTGGTTGA      | miRNA | let-7b      |
| t0010366 | 21 | 40 TGAGGTAGTCGTTGTATAGT         | miRNA | let-7       |
| t0010373 | 20 | 39 TATACAACCTACTACTTTCC         | miRNA | miR-98*     |
| t0010487 | 23 | 39 TATTGCACTTGTCCCGCCTGGA       | miRNA | miR-92b-3p  |
| t0010430 | 22 | 39 AGAGGAGATGGCGCAGGGGACA       | miRNA | miR-877     |
| t0010459 | 26 | 39 AAGTTGATTGTGACTGGCATTITTA    | miRNA | miR-753c    |
| t0010475 | 22 | 39 CCTCCCACTCAAGGCTTGCA         | miRNA | miR-532-3p  |
| t0010490 | 20 | 39 TAGCAGCGGGAACAGTTTTG         | miRNA | miR-503     |
| t0010434 | 24 | 39 TCCTGTAAGTACTGAGCTGCCCCGAGTA | miRNA | miR-486-5p  |
| t0010324 | 23 | 39 TCCTGTAAGTACTGAGCTGCCCCGAGC  | miRNA | miR-486-5p  |
| t0010426 | 19 | 39 TCCTGTAAGTACTGAGCTGCCGA      | miRNA | miR-486-5p  |
| t0010370 | 20 | 39 CGGGGCAGCTCAGTACAGGA         | miRNA | miR-486-3p  |

|          |    |                                 |       |             |
|----------|----|---------------------------------|-------|-------------|
| t0010267 | 21 | 39 ATGCGGACCTGGGTTAGCGGA        | miRNA | miR-4754    |
| t0010359 | 22 | 39 TCTCCCTTCCTGCCCTGGCTAG       | miRNA | miR-4685-3p |
| t0010296 | 23 | 39 AAGGGCTGGGTTCGGTTCGGGCTGG    | miRNA | miR-4651    |
| t0010868 | 20 | 39 AAAACGTTACCATTACTGAG         | miRNA | miR-451     |
| t0010859 | 22 | 39 AAACCGATAACCATTACTGAGTT      | miRNA | miR-451     |
| t0010809 | 21 | 39 AAACCGTTGCCATTACTGAGT        | miRNA | miR-451     |
| t0010693 | 20 | 39 AAACCTCACCATTACTGAG          | miRNA | miR-451     |
| t0010569 | 22 | 39 AAAAGCTGGGCTGAGAGGGCGA       | miRNA | miR-4429    |
| t0010727 | 19 | 39 TGAGGGTCAGAGAGCGAGA          | miRNA | miR-423-5p  |
| t0010556 | 22 | 39 TTTGAGGGGCAGAGAGCGAGAC       | miRNA | miR-423-5p  |
| t0010561 | 23 | 39 TGAGGGGCAGAGAGCGAGCCTTA      | miRNA | miR-423-5p  |
| t0010713 | 22 | 39 TGAGGGTCAGAGAGCGAGACTT       | miRNA | miR-423-5p  |
| t0010573 | 22 | 39 ATCAACAGACATTAATTGGGCG       | miRNA | miR-421     |
| t0010818 | 28 | 39 GAAACGGACAAGGGGAATCCGACTGTTT | miRNA | miR-3896-3p |
| t0010851 | 24 | 39 TTGAAGATTGAAGTGGAGAAGGGT     | miRNA | miR-3526    |
| t0010734 | 22 | 39 GCCCCTGGGCCTATCCTAGAAA       | miRNA | miR-331     |
| t0010566 | 20 | 39 CCACTGCCCCAGGTGCTGCT         | miRNA | miR-324-3p  |
| t0010843 | 23 | 39 AAAAGCTGGGTTGAGAGGGCTAA      | miRNA | miR-320d    |
| t0010880 | 21 | 39 AAGCTGGGTTGAGAGGGCGTA        | miRNA | miR-320d    |
| t0010891 | 24 | 39 AAAAGCTGGGTTGAGAGGGCAATA     | miRNA | miR-320b    |
| t0010752 | 21 | 39 AAAAGCTAGGTTGAGAGGGCG        | miRNA | miR-320a    |
| t0010562 | 22 | 39 AAAAGCTGGGTTGTGAGGGCGA       | miRNA | miR-320a    |
| t0010748 | 24 | 39 AAAAGCTGGGTTGAGAGGGCGAGC     | miRNA | miR-320a    |
| t0010758 | 23 | 39 AAAAGCTGTGTTGAGAGGGCGAA      | miRNA | miR-320a    |
| t0010819 | 25 | 39 AAAAGCTGGGTTGAGAGGGCGAAGA    | miRNA | miR-320a    |
| t0010598 | 23 | 39 AAAAGCTGGTTTGAGAGGGCGAT      | miRNA | miR-320a    |
| t0010779 | 24 | 39 AATCTGAGAAGGCGCACAAAGGTAA    | miRNA | miR-3200-5p |
| t0010586 | 22 | 39 GTGGAGTCCTGGGGAATGGAGA       | miRNA | miR-3198    |
| t0010541 | 22 | 39 CACAGCAAGTGTAGACAGGCAA       | miRNA | miR-3120-3p |
| t0010564 | 27 | 39 TGTA AACATCCCCGACTGGAAGCTATC | miRNA | miR-30d     |
| t0010724 | 23 | 39 CGCGGGTCGGGGGGCGGGGCGGA      | miRNA | miR-2981    |
| t0010829 | 21 | 39 TCCAAGTAATTCAGGATAGGT        | miRNA | miR-26b     |
| t0010804 | 24 | 39 CTGACCTATGAATTGACAGCCAAA     | miRNA | miR-192     |
| t0010587 | 25 | 39 CTGACCTATGAATTGACAGCCAGAA    | miRNA | miR-192     |
| t0010642 | 23 | 39 CAACGGAATCCTAAAAGCAGCTG      | miRNA | miR-191     |
| t0010725 | 20 | 39 CAAAGAATTTTCTTTTGGG          | miRNA | miR-186     |
| t0010736 | 21 | 39 TGGAGAGAAAGGCAGGCCCTG        | miRNA | miR-185     |
| t0010768 | 20 | 39 TGGAGAGAATGGCAGTTCCT         | miRNA | miR-185     |
| t0010793 | 23 | 39 TGGAGAGAAAGGCAGTTTTTTGAG     | miRNA | miR-185     |
| t0010687 | 24 | 39 AACATTCATTGCTGTCGGTGGATC     | miRNA | miR-181b    |
| t0010532 | 26 | 39 TAGCAGCACGTA AATATTGCTAGTGT  | miRNA | miR-16b     |
| t0010660 | 23 | 39 ATAGCAGCACGTA AATATTGGCA     | miRNA | miR-16b     |
| t0010613 | 21 | 39 TAGCAGCACATAATGGATTGT        | miRNA | miR-15a     |
| t0010692 | 24 | 39 TACTAGACTGAAGCTCCTTGAGGA     | miRNA | miR-151-3p  |
| t0010790 | 19 | 39 TACAGTATAGATGATGTTT          | miRNA | miR-144     |
| t0010764 | 23 | 39 GTAGTGTTCCTACTTTATGGCA       | miRNA | miR-142-3p  |
| t0010872 | 21 | 39 ACCACAGGGTAAAACACCGA         | miRNA | miR-140     |
| t0010666 | 23 | 39 TACCACAGGGTAGAACCACCGAC      | miRNA | miR-140     |
| t0010803 | 23 | 39 ACCACATGGTAGAACCACGGACG      | miRNA | miR-140     |
| t0010585 | 24 | 39 ACCACAGGGTAGAATTACGGAAGG     | miRNA | miR-140     |
| t0010707 | 23 | 39 TACCACAGGGTAGATCCACGGAA      | miRNA | miR-140     |
| t0010882 | 22 | 39 ACCACAAGGTAGAACCACGGAA       | miRNA | miR-140     |
| t0010881 | 22 | 39 CATTACTTTTTGGTACGCGT         | miRNA | miR-126-5p  |
| t0010807 | 22 | 39 TACCCTGTAGATCCGAATTTGT       | miRNA | miR-10a     |
| t0010817 | 20 | 39 TAAAGTGCTGACAGTGTAGA         | miRNA | miR-106b    |
| t0010708 | 24 | 39 ATAAAGTGCTGACAGTGCAGATAA     | miRNA | miR-106b    |
| t0010695 | 21 | 39 AGCAGCATTGTACAAGGCTAT        | miRNA | miR-103a    |
| t0010640 | 23 | 39 AGCAGAATTGTACAGGGCTATGA      | miRNA | miR-103a    |

|          |    |                                   |       |              |
|----------|----|-----------------------------------|-------|--------------|
| t0010593 | 21 | 39 AGCAGAATTGTACAGGGCTAT          | miRNA | miR-103a     |
| t0010534 | 23 | 39 GTACAGTACTGTGATAACTGAAT        | miRNA | miR-101      |
| t0010567 | 26 | 39 TACAGTACTGTGATAACTGAAGGCGC     | miRNA | miR-101      |
| t0010616 | 21 | 39 TGAGGGAGTAGTTTGTGCTGT          | miRNA | let-7i       |
| t0010699 | 22 | 39 TGAGGTAGTAGTTTGTCTGTT          | miRNA | let-7i       |
| t0010852 | 22 | 39 GAGGTAGTAGATTGTATAGTTG         | miRNA | let-7f       |
| t0010893 | 24 | 39 TGAGGTAGTAGATTGTATAGTCAA       | miRNA | let-7f       |
| t0010612 | 20 | 39 AGAAGTAGTAGGTTGCATAG           | miRNA | let-7d       |
| t0010629 | 21 | 39 AAGAGGTAGTAGGTTGCATAG          | miRNA | let-7d       |
| t0010737 | 20 | 39 TAGGTAGTAGGTTGTGTGGT           | miRNA | let-7b       |
| t0010772 | 20 | 39 TGAGGTAGTAGGTTGCGTGG           | miRNA | let-7b       |
| t0010540 | 26 | 39 TGAGGTAGTAGGTTGTGTGGTTAGAT     | miRNA | let-7b       |
| t0010728 | 24 | 39 TGAGGTAGTAGGTTGTATGGAATC       | miRNA | let-7-5p     |
| t0010886 | 19 | 39 AGGTAGTAGGTTGTATAGT            | miRNA | let-7        |
| t0010589 | 23 | 38 CAGGTGGAAGGTTGTAGGCATGT        | miRNA | miR-965-5p   |
| t0010698 | 26 | 38 CAAAGTGCTGTTCTGTCAGGTAGATC     | miRNA | miR-93       |
| t0010580 | 23 | 38 TATTGCACTCGTCCCGCCTAAG         | miRNA | miR-92       |
| t0010814 | 21 | 38 TATTGCACTCGTCCCGGCCAA          | miRNA | miR-92       |
| t0010606 | 19 | 38 GGGCAGGTGGTGTAGTGGT            | miRNA | miR-885      |
| t0010732 | 22 | 38 CGGGGCTAGGGCTAACAGCAGA         | miRNA | miR-744      |
| t0010658 | 23 | 38 TATTCATTGCATATCGGAGTTGT        | miRNA | miR-660      |
| t0010822 | 22 | 38 CCTCCACACCCAAGGCTTGCC          | miRNA | miR-532-3p   |
| t0010568 | 27 | 38 TCCTGTAAGTACTGAGCTGCCCGACGCTAC | miRNA | miR-486-5p   |
| t0010766 | 21 | 38 TCCTGCACTGAGCTGCCCCGA          | miRNA | miR-486-5p   |
| t0010825 | 21 | 38 TCCTGTAAGTACTGAGCTGCCCCGA      | miRNA | miR-486-5p   |
| t0010604 | 22 | 38 CTCTGTAAGTACTGAGCTGCCCCGAG     | miRNA | miR-486-5p   |
| t0010781 | 23 | 38 TCCTGTAAGTACTGAGCTGCCCCGCGT    | miRNA | miR-486-5p   |
| t0010907 | 20 | 38 AAGGTATTGTTTACAGACTTAT         | miRNA | miR-4678     |
| t0011054 | 19 | 38 AACCTTTACCATTACTGAG            | miRNA | miR-451      |
| t0010930 | 19 | 38 AAACATTACCATTACTGAG            | miRNA | miR-451      |
| t0011191 | 23 | 38 TTCGGGGTCTGGGCGCGGCGAGA        | miRNA | miR-4508     |
| t0010909 | 22 | 38 TGAGGGGCAGGGAGCGAGACTT         | miRNA | miR-423-5p   |
| t0011164 | 23 | 38 CTGAGGGGCAGAGAGCGAGACTT        | miRNA | miR-423-5p   |
| t0011043 | 22 | 38 ATATAATACAATCTGCTAAGTG         | miRNA | miR-374      |
| t0010943 | 22 | 38 ATATAATATAACCTGCTAAGTG         | miRNA | miR-374      |
| t0010962 | 21 | 38 ACTGCCCCAGGTGCTGCTGGT          | miRNA | miR-324-3p   |
| t0011031 | 20 | 38 AAAAGCTGGGTTGAGAGGCG           | miRNA | miR-320d     |
| t0011046 | 22 | 38 AAAAGCTGAGTTGAGAGGGCGT         | miRNA | miR-320d     |
| t0011113 | 22 | 38 AAAAGCTGGGTTGAGAGGGAAT         | miRNA | miR-320d     |
| t0011162 | 23 | 38 TGTA AACATCCTACACTCTCAGC       | miRNA | miR-30c      |
| t0011261 | 27 | 38 CGCGGGTTCGGGGGCGGGGCGGACTGT    | miRNA | miR-2981     |
| t0011134 | 22 | 38 CATTGCACTTGTCTCAGTCTGA         | miRNA | miR-25       |
| t0011265 | 24 | 38 TGGCTCAGTTCAGCAGGAACAGAA       | miRNA | miR-24b      |
| t0011058 | 22 | 38 AGCTACATTGTCTGCTGGGTTA         | miRNA | miR-221      |
| t0011122 | 20 | 38 AGTTCTTCAAGTGGCAAGCTT          | miRNA | miR-22*      |
| t0011168 | 20 | 38 GACTGGGGCGGGACATCTGT           | miRNA | miR-219-2-3p |
| t0010945 | 25 | 38 TGAATGTAATGAAGTGTGTGGATC       | miRNA | miR-206      |
| t0011047 | 22 | 38 TTGAGAGAAAGGCAGTTCCTGA         | miRNA | miR-185      |
| t0011232 | 23 | 38 TTGAGAGAGAAAGGCAGTTCCTGA       | miRNA | miR-185      |
| t0011008 | 22 | 38 TGGAGAGAAAGGCAGTTCCTAT         | miRNA | miR-185      |
| t0011142 | 19 | 38 TAGAGAAAGGCAGTTCCTG            | miRNA | miR-185      |
| t0011145 | 23 | 38 ATGGCACTGGTAGAATTCAGTGA        | miRNA | miR-183      |
| t0011044 | 23 | 38 TGAGGGAGTAGATTGTATAGTTT        | miRNA | miR-1827     |
| t0011343 | 23 | 38 AACATTCATTGTTGTGCGGTGGT        | miRNA | miR-181d     |
| t0011130 | 18 | 38 TCGGGGCGGCGGCGGCGG             | miRNA | miR-1777a    |
| t0010905 | 23 | 38 TAGCAGCACGTAATATTGGGGT         | miRNA | miR-16       |
| t0011067 | 22 | 38 TAGCAGCACGTAATATTGGCG          | miRNA | miR-16       |
| t0010931 | 22 | 38 TAGCAGCACATCATGTTATCA          | miRNA | miR-15c      |

|          |    |                                   |       |              |
|----------|----|-----------------------------------|-------|--------------|
| t0011034 | 21 | 38 TAGCAGCACATCATGGGTTAC          | miRNA | miR-15b      |
| t0011186 | 20 | 38 TAGCAGCACATCATGGTTGA           | miRNA | miR-15b      |
| t0011041 | 20 | 38 TATCAGCACATAATGGTTTG           | miRNA | miR-15a      |
| t0011060 | 21 | 38 TAGCAGCACATAATCGTTTGT          | miRNA | miR-15a      |
| t0011230 | 22 | 38 AATTACAGTATAGATGATGTAC         | miRNA | miR-144      |
| t0011236 | 22 | 38 TACCACAGGGTAGAACCCCGGC         | miRNA | miR-140      |
| t0011099 | 19 | 38 ACCACAGGGTAGAACCACG            | miRNA | miR-140      |
| t0011163 | 24 | 38 TACCACAGGGTAGAACTACGGACG       | miRNA | miR-140      |
| t0011004 | 20 | 38 ACCACAGGATAGAACCACGG           | miRNA | miR-140      |
| t0011308 | 23 | 38 TACCACAGGGTAGAACTACGGAG        | miRNA | miR-140      |
| t0010954 | 22 | 38 CCACAGGGTAGAACCACGGACG         | miRNA | miR-140      |
| t0010994 | 21 | 38 TCACAGTGAACCGGTCTCTTG          | miRNA | miR-128      |
| t0010992 | 23 | 38 CATTATTACTTTTGGTACGCGAA        | miRNA | miR-126-5p   |
| t0011211 | 22 | 38 AGCAGCATTGCACAGGGCTATT         | miRNA | miR-107      |
| t0011262 | 23 | 38 TACCGCACTGTGGGTACTTGCTA        | miRNA | miR-106b*    |
| t0010896 | 23 | 38 AGCAGTATTGTACAGGGCTATGT        | miRNA | miR-103a     |
| t0011339 | 25 | 38 TACAGTACTGTGATAACTGACTATC      | miRNA | miR-101c     |
| t0011128 | 24 | 38 GTACAGTACTGTGATAACTGACGG       | miRNA | miR-101c     |
| t0010939 | 22 | 38 TACAGTACTCTGATAACTGAAG         | miRNA | miR-101      |
| t0011083 | 21 | 38 TGAGGTAGTAGTTTGTGCTTG          | miRNA | let-7i       |
| t0011176 | 20 | 38 TGAGGTAGTGTTTGTACAG            | miRNA | let-7g       |
| t0011187 | 23 | 38 TGAGGTATTAGATTGTATAGTTG        | miRNA | let-7f       |
| t0011304 | 22 | 38 AGGGGTAGTAGGTTGCATAGTT         | miRNA | let-7d       |
| t0011346 | 22 | 38 AGAGTTAGTAGGTTGCATAGTT         | miRNA | let-7d       |
| t0010990 | 21 | 38 AGAGGTAGTAGGCTGCATAGT          | miRNA | let-7d       |
| t0011116 | 20 | 38 AGGTAGTAGGTTGCATAGTT           | miRNA | let-7d       |
| t0011139 | 22 | 38 AGAGGTAGTAGGTTGCATAGGT         | miRNA | let-7d       |
| t0011326 | 19 | 38 AGAGGTAGTAGGTTGCAGT            | miRNA | let-7d       |
| t0010985 | 21 | 38 AGAGGTAGTAGGTTCCATAGT          | miRNA | let-7d       |
| t0010925 | 22 | 38 AGAGGTAGTAGGTTGTGTGGTT         | miRNA | let-7b       |
| t0011190 | 23 | 38 TGAGGTAGTAGGTTGTGGGGTTA        | miRNA | let-7b       |
| t0011286 | 23 | 38 TGAGGTAGGAGGTTGTATAGTTA        | miRNA | let-7        |
| t0011040 | 22 | 38 TGAGATAGTAGGTTGTATAGTT         | miRNA | let-7        |
| t0010961 | 22 | 38 TGAGGTAGTAGGTTGTCTAGTT         | miRNA | let-7        |
| t0011220 | 21 | 37 AGAGGAGATGGCGCAGGGGAA          | miRNA | miR-877      |
| t0010953 | 21 | 37 AGAGGAGATGGCGCAGGGGAC          | miRNA | miR-877      |
| t0011093 | 21 | 37 AAGTTGGATTGTGACTGGCCT          | miRNA | miR-753c     |
| t0011108 | 28 | 37 TGGTGCGGACCAGGGGAATCCGACTGTT   | miRNA | miR-5109     |
| t0011171 | 21 | 37 TCCTGTACTGAGTCGCCCGA           | miRNA | miR-486-5p   |
| t0011260 | 29 | 37 TCCTGTACTGAGCTGCCCGAGCTCGGCA   | miRNA | miR-486-5p   |
| t0011325 | 25 | 37 TCCTGTACTGAGCTGCCCGAGGAA       | miRNA | miR-486-5p   |
| t0011341 | 21 | 37 TCCCGTACTGAGCTGCCCGA           | miRNA | miR-486-5p   |
| t0011148 | 29 | 37 TCCTGTACTGAGCTGCCCGAGGCGGCA    | miRNA | miR-486-5p   |
| t0011342 | 24 | 37 TGTAGAGCAGGGAGCAGGAAGTAA       | miRNA | miR-4732-5p  |
| t0011003 | 28 | 37 AGGGCTGGGTTCGGTTCGGGCTGGGGCGAT | miRNA | miR-4651     |
| t0011068 | 24 | 37 AAACCGTTATTACTGAGTTTA          | miRNA | miR-451      |
| t0011124 | 30 | 37 AAACCGTTACCATTACTGAGTTCGGCACC  | miRNA | miR-451      |
| t0011353 | 23 | 37 AAACCGTTACCATTACTGCGTTT        | miRNA | miR-451      |
| t0011513 | 27 | 37 CCACAAACCGTTACCATTACTGAGTTT    | miRNA | miR-451      |
| t0011642 | 23 | 37 AAATTGTTACCATTACTGAGTTA        | miRNA | miR-451      |
| t0011561 | 21 | 37 AAACCGTTACCATTACTGATT          | miRNA | miR-451      |
| t0011420 | 22 | 37 TGGAGAGAAAGGCAGTAGTTGT         | miRNA | miR-4306     |
| t0011579 | 21 | 37 AGGGGCAGAGAGCGAGACTTA          | miRNA | miR-423-5p   |
| t0011625 | 21 | 37 TGGACTCGCAGGAACAGGTCT          | miRNA | miR-4001b-5p |
| t0011710 | 23 | 37 CCCTCGAACTGTTGTGGCCATTT        | miRNA | miR-3487     |
| t0011711 | 24 | 37 TCACACAGAAATCGCACCCGTCAT       | miRNA | miR-342-3p   |
| t0011542 | 22 | 37 CTTACACAGAAATCGCACCCG          | miRNA | miR-342-3p   |
| t0011470 | 22 | 37 AAAAGCTGGATTGAGAGGGCGT         | miRNA | miR-320d     |

|          |    |                                |       |             |
|----------|----|--------------------------------|-------|-------------|
| t0011371 | 23 | 37 AAAAGTTGGGTTGAGAGGGCGAC     | miRNA | miR-320a    |
| t0011464 | 23 | 37 TTTTCAGTCGGATGTTTACAGTTC    | miRNA | miR-30b-3p  |
| t0011632 | 19 | 37 TTCAAGTAATCCAGGATGC         | miRNA | miR-26a     |
| t0011679 | 24 | 37 GGCTCTAAGGGCTGGGTCCGGTCGG   | miRNA | miR-2487    |
| t0011683 | 20 | 37 TGACCTATGAATTGACAGTC        | miRNA | miR-192     |
| t0011751 | 22 | 37 AACGGAATCCCAAAGCAGCTA       | miRNA | miR-191     |
| t0011730 | 22 | 37 TAAGGTGCATCTAGTGCAGTTA      | miRNA | miR-18b     |
| t0011433 | 23 | 37 TGTAGAGAAAGGCAGTTCCTGAA     | miRNA | miR-185     |
| t0011479 | 22 | 37 TGGAGAGAAAGGAAGTTACTGA      | miRNA | miR-185     |
| t0011588 | 24 | 37 TTTGGCAATGGTAGAATTCACACT    | miRNA | miR-182     |
| t0011418 | 22 | 37 TTGGTGTATGTGCTTGGCTATC      | miRNA | miR-1755    |
| t0011720 | 22 | 37 TCAAAGTGCTTACAGTGCAGGT      | miRNA | miR-17      |
| t0011681 | 22 | 37 ACAAAGTGCTTACAGTGCAGGT      | miRNA | miR-17      |
| t0011680 | 25 | 37 TAGCAGCACGTAATATTGGCAGAT    | miRNA | miR-16b     |
| t0011384 | 23 | 37 TAGCAGCACGTAATATTGGCCT      | miRNA | miR-16b     |
| t0011523 | 21 | 37 TAGCAGCATATCATGGTTTAC       | miRNA | miR-15b     |
| t0011709 | 22 | 37 TAGAAGCACATCATGGTTTACA      | miRNA | miR-15b     |
| t0011417 | 19 | 37 TAGCAGCACATCATGTTTA         | miRNA | miR-15b     |
| t0011776 | 19 | 37 TAGCAGCACATCATGCTTT         | miRNA | miR-15b     |
| t0011707 | 20 | 37 TACAGTATAGATGATGTAAA        | miRNA | miR-144     |
| t0011448 | 23 | 37 TGAGATGAAGCACTGTAGATATC     | miRNA | miR-143     |
| t0011753 | 23 | 37 ACCACAGGGTAGAACCATGGACG     | miRNA | miR-140     |
| t0011510 | 22 | 37 ACCACATGGTAGAACCACGGAA      | miRNA | miR-140     |
| t0011456 | 21 | 37 AACACAGGGTAGAACCACGGA       | miRNA | miR-140     |
| t0011526 | 22 | 37 ACCACAGGGAAGAACCACGGAA      | miRNA | miR-140     |
| t0011645 | 22 | 37 AGCTTCTTTACAGTGTGCCTT       | miRNA | miR-103a-2* |
| t0011388 | 22 | 37 AGCAGCATTGTACACGGCTATG      | miRNA | miR-103a    |
| t0011536 | 20 | 37 AGCAGCATTGGACAGGGCTA        | miRNA | miR-103a    |
| t0011358 | 22 | 37 GGCAGCATTGTACAGGGCTATG      | miRNA | miR-103a    |
| t0011501 | 22 | 37 AGCAGCATTGTTCAGGGCTATG      | miRNA | miR-103a    |
| t0011615 | 22 | 37 TACAGTATCGTGATAACTGAAG      | miRNA | miR-101     |
| t0011712 | 21 | 37 TACAGTACTGTGATTACTGAA       | miRNA | miR-101     |
| t0011401 | 22 | 37 TGAGGTAGTAGTTCGTGTGGTT      | miRNA | let-7h      |
| t0011361 | 20 | 37 CAGGTAGTAGATTGTATAGT        | miRNA | let-7f      |
| t0011528 | 20 | 37 TGTGGTAGTAGATTGTATAG        | miRNA | let-7f      |
| t0011540 | 27 | 37 TGAGGTAGTAGATTGTATAGTGGCCGA | miRNA | let-7f      |
| t0011670 | 26 | 37 TGAGGTAGTAGATTGTATAGTTGAAA  | miRNA | let-7f      |
| t0011732 | 20 | 37 TAGTAGTAGATTGTATAGTT        | miRNA | let-7f      |
| t0011515 | 27 | 37 TGAGGTAGTAGATTGTATAGTCCTGTT | miRNA | let-7f      |
| t0011356 | 22 | 37 TGAGGTAGTAGGTGGTGTGGTA      | miRNA | let-7b      |
| t0011537 | 19 | 37 TGAGGTAGTAGGTTGTGTA         | miRNA | let-7b      |
| t0011605 | 22 | 37 GAGGTAGTAGGTTGCATAGTAA      | miRNA | let-7-5p    |
| t0011639 | 20 | 37 TGGGGTAGTAGGTTGTATAG        | miRNA | let-7       |
| t0011435 | 20 | 37 TGAGGTAGTAAGTTGTATAG        | miRNA | let-7       |
| t0011749 | 21 | 37 TGAGGTAGTAGGTTGTCTAGT       | miRNA | let-7       |
| t0011653 | 20 | 36 TATACACTTACTACTTTCA         | miRNA | miR-98*     |
| t0011549 | 24 | 36 AGGTGGAAGGTTGTAGGCATCTAT    | miRNA | miR-965-5p  |
| t0011610 | 23 | 36 TATTGCACTCGTCCCGGCCCTCCA    | miRNA | miR-92      |
| t0011627 | 23 | 36 TATTGCACTCGTCCCGGCCAATT     | miRNA | miR-92      |
| t0011674 | 28 | 36 TCCTGTACTGAGCTGCCCGAGGCGGCA | miRNA | miR-486-5p  |
| t0011697 | 19 | 36 TCCTGTACTGAGCTGCCTC         | miRNA | miR-486-5p  |
| t0011739 | 20 | 36 ATCTGTACTGAGCTGCCCGG        | miRNA | miR-486-5p  |
| t0011430 | 21 | 36 TTGTACTGAGCTGCCCGAGT        | miRNA | miR-486-5p  |
| t0011766 | 23 | 36 TCCTGTACTGAGCCGCCCGAGA      | miRNA | miR-486-5p  |
| t0011383 | 21 | 36 CTGTACTGAGCTGCCCGAGA        | miRNA | miR-486-5p  |
| t0011399 | 19 | 36 AACAGGACGTCACAGAGGG         | miRNA | miR-4757-3p |
| t0011551 | 21 | 36 TGAGGGAAGGAGGCTTGGTCT       | miRNA | miR-4747-5p |
| t0011760 | 23 | 36 TCTCCCTTCTGCCCTGGCTTAA      | miRNA | miR-4685-3p |

|          |    |                                 |       |              |
|----------|----|---------------------------------|-------|--------------|
| t0011929 | 24 | 36 TAGTGCAATATTGCTTATAGGGTT     | miRNA | miR-454      |
| t0012094 | 23 | 36 AAACCGTTACCATTACTGAGATT      | miRNA | miR-451      |
| t0011922 | 22 | 36 AAACCGTTACCATTACTGAGTTT      | miRNA | miR-451      |
| t0012216 | 19 | 36 AAACCGTTACTATTACTGA          | miRNA | miR-451      |
| t0011846 | 22 | 36 GAACCGTTACCATTACTGAGTT       | miRNA | miR-451      |
| t0011911 | 22 | 36 AAACCGTTACCATCATTGAGTT       | miRNA | miR-451      |
| t0011926 | 22 | 36 TTCGGGGTCTGGGCGCGGCGAT       | miRNA | miR-4508     |
| t0011950 | 22 | 36 TCGGATCCGAGTCACGGCACCA       | miRNA | miR-4454     |
| t0011981 | 20 | 36 TTGGAGGAGATGCGGTTATT         | miRNA | miR-4443     |
| t0012117 | 24 | 36 ACTCCCACTGCTTCACTTGACTAG     | miRNA | miR-4301     |
| t0012219 | 23 | 36 TGAGGGGGAGAGAGCGAGACTTT      | miRNA | miR-423-5p   |
| t0012109 | 22 | 36 TGAGGGGCAGAGAGCGTGACTT       | miRNA | miR-423-5p   |
| t0011810 | 22 | 36 TGAGGGGCATAGAGCGAGACTT       | miRNA | miR-423-5p   |
| t0012019 | 23 | 36 TGAGGGGCAGAGAGTGAGACTTA      | miRNA | miR-423-5p   |
| t0012078 | 23 | 36 TGGACTCGCAGGAACAGGCCTAT      | miRNA | miR-4001b-5p |
| t0012091 | 21 | 36 ACTGGACTGGGAGTCAGAAGG        | miRNA | miR-378      |
| t0012121 | 25 | 36 ACTGGACTTGGTGTGAGAAGGCATC    | miRNA | miR-378      |
| t0012136 | 20 | 36 ATGCACGGTATCCATCTGT          | miRNA | miR-363      |
| t0012164 | 26 | 36 TGAAGACTGAAGTGGAGAAGGGTTTC   | miRNA | miR-3526     |
| t0012139 | 21 | 36 CGCCCTCGAACTGTTGTGGCA        | miRNA | miR-3487     |
| t0011964 | 21 | 36 TCCTCGAACTGTTGTGGCCAT        | miRNA | miR-3487     |
| t0012124 | 22 | 36 ATGCCTGACCACCGTCTACCTT       | miRNA | miR-3483-3p  |
| t0011833 | 23 | 36 AAAAGCTGGGTTGAGAGGGCCAT      | miRNA | miR-320d     |
| t0011878 | 21 | 36 CTTTCAGTCGGATGTTTACAG        | miRNA | miR-30e*     |
| t0011915 | 21 | 36 GTAAACATCCTTGACTGGAAG        | miRNA | miR-30e      |
| t0011928 | 26 | 36 TGTAACATCCTACACTCTCAGCATC    | miRNA | miR-30c      |
| t0012088 | 22 | 36 TTTTCAGTCGGATGTTTACAGC       | miRNA | miR-30b-3p   |
| t0011840 | 22 | 36 TTTTCAGTCGGATGTTTACAGT       | miRNA | miR-30b-3p   |
| t0011996 | 24 | 36 TTCAAGTAATTCAGGATAGGTTGA     | miRNA | miR-26b      |
| t0012108 | 28 | 36 CATTGCACTTGTCTCGGTCTGACGGGGC | miRNA | miR-25       |
| t0011991 | 23 | 36 CATTGCACTTGTCTCGGTCTGTT      | miRNA | miR-25       |
| t0011904 | 21 | 36 CAGCTACATTGTCTGCTGGGT        | miRNA | miR-221      |
| t0011938 | 22 | 36 CCTCCTGCCCTCCTTGCTGTAG       | miRNA | miR-1976     |
| t0012057 | 22 | 36 CAACGGAATCCCAAAGCAGAT        | miRNA | miR-191      |
| t0012140 | 25 | 36 CAACGGAATCCCAAAGCAGCTATC     | miRNA | miR-191      |
| t0012144 | 20 | 36 ACGGAATCCCAAAGCAGCA          | miRNA | miR-191      |
| t0012226 | 23 | 36 ACAACGGAATCCCAAAGCAGAA       | miRNA | miR-191      |
| t0011828 | 18 | 36 TGGAGAGAAAGGCAGTTA           | miRNA | miR-185      |
| t0012022 | 24 | 36 TGGACGGAGAACTGATAAGCCATC     | miRNA | miR-184      |
| t0011999 | 19 | 36 TATGGCACTGGTAGAATTC          | miRNA | miR-183      |
| t0012200 | 28 | 36 TTTGGCAATGGTAGAACTCACACCGATC | miRNA | miR-182      |
| t0012212 | 26 | 36 CAAGTAGCAGCACGTAAATATTGGCG   | miRNA | miR-16       |
| t0011876 | 22 | 36 TAGCAGCACATCATCGTTTACA       | miRNA | miR-15b      |
| t0011967 | 24 | 36 TACCACAGGGTATAACCACGGACA     | miRNA | miR-140      |
| t0011994 | 22 | 36 TACCACAGGGTAGAACCACGTT       | miRNA | miR-140      |
| t0012130 | 21 | 36 ACCACAGGGTAGGACCACGGA        | miRNA | miR-140      |
| t0011949 | 23 | 36 TACCACAGGGTAGAATTACGGAT      | miRNA | miR-140      |
| t0011972 | 19 | 36 ATTTTAGAGACGGGGTTTG          | miRNA | miR-1303     |
| t0012073 | 21 | 36 TGTGTGTGTGTATGTGTGAGA        | miRNA | miR-1187     |
| t0012152 | 25 | 36 TACCCTGTAGAACCGAATTTGTATC    | miRNA | miR-10b      |
| t0011971 | 23 | 36 AGCAGCATTGTACAAGGCTATGA      | miRNA | miR-103a     |
| t0012174 | 23 | 36 AGCAGCATTGTAAAGGGCTATGA      | miRNA | miR-103a     |
| t0011857 | 22 | 36 GTACAGTACTGTGATAACTAAA       | miRNA | miR-101      |
| t0012165 | 25 | 36 TGGAAATGTAAAGAAGTGTGTGTATC   | miRNA | miR-1        |
| t0012179 | 25 | 36 TGAGGTAGTAGATTGAATAGTTATC    | miRNA | let-7k       |
| t0012004 | 21 | 36 TGAGGTGGTAGTTTGTACAGT        | miRNA | let-7g       |
| t0011793 | 22 | 36 TGATGTAGTAGTTTGTACAGTT       | miRNA | let-7g       |
| t0011871 | 24 | 36 TTTGAGGTAGTAGATTGTATAGTT     | miRNA | let-7f       |



|          |    |                              |       |             |
|----------|----|------------------------------|-------|-------------|
| t0012064 | 19 | 36 TGGGTAGTAGATTGTATAG       | miRNA | let-7f      |
| t0012101 | 22 | 36 AGAGGTAGTACGTTGCATAGTT    | miRNA | let-7d      |
| t0012228 | 22 | 36 TGAGGTATCAGGTTGTGTGGTT    | miRNA | let-7b      |
| t0011946 | 25 | 36 TGAGGTAGTAGGTCGTGTGGTTATC | miRNA | let-7b      |
| t0012050 | 20 | 36 TCAGGTAGTAGGTTGTGTGG      | miRNA | let-7b      |
| t0012063 | 25 | 36 TGAGGTTGTAGGTTGTGTGGTTATC | miRNA | let-7b      |
| t0012204 | 20 | 36 TGAGGTAGCAGGTTGTATAG      | miRNA | let-7       |
| t0011802 | 21 | 36 TGAGGTAGTAGGTTGGATAGT     | miRNA | let-7       |
| t0011819 | 21 | 35 TATTGCACTCGTCTCGGCCTC     | miRNA | miR-92      |
| t0012132 | 19 | 35 TGGAAGACTAGTGATTTTG       | miRNA | miR-7       |
| t0011813 | 22 | 35 ATGCCTTGAGTGTAGGACCGTA    | miRNA | miR-532-5p  |
| t0012098 | 21 | 35 TCCTATACTGAGCTGCCCGA      | miRNA | miR-486-5p  |
| t0011925 | 23 | 35 TCCTCTACTGAGCTGCCCGAGT    | miRNA | miR-486-5p  |
| t0012156 | 22 | 35 TCCTGTACTGTGCTGCCCGAG     | miRNA | miR-486-5p  |
| t0012051 | 24 | 35 CTGGGTCGGTCGGGCTGGGGCGCG  | miRNA | miR-4651    |
| t0012081 | 22 | 35 AAACCGTTAGCATTACTGAGTT    | miRNA | miR-451     |
| t0012099 | 23 | 35 AAACCGTTACCATTACTGAGCTT   | miRNA | miR-451     |
| t0012103 | 22 | 35 AGACCGTTACCATTACTGAGTT    | miRNA | miR-451     |
| t0012223 | 20 | 35 AAACGGTTACCATTACTGAG      | miRNA | miR-451     |
| t0011791 | 21 | 35 TTCGGGGTCTGGGCGCGGCGT     | miRNA | miR-4508    |
| t0012016 | 21 | 35 TGAGGGGAGAGAGCGAGACT      | miRNA | miR-423-5p  |
| t0012446 | 25 | 35 TGAGGGGCAGAGAGCGAGACTTTAG | miRNA | miR-423-5p  |
| t0012462 | 20 | 35 AACTGAAACGGACAAGGGGA      | miRNA | miR-3896-3p |
| t0012350 | 25 | 35 ACTGGACTTGGAGTCAGAAGGCATT | miRNA | miR-378     |
| t0012310 | 25 | 35 CTGGACTTGGAGTCAGAAGGCTATC | miRNA | miR-378     |
| t0012422 | 19 | 35 CTTATCAGATTGTATTGTA       | miRNA | miR-374a*   |
| t0012611 | 21 | 35 CTTATCAGATTGTATTGTAAT     | miRNA | miR-374a*   |
| t0012586 | 19 | 35 TTGAAGACTGAAGTGGAGA       | miRNA | miR-3526    |
| t0012306 | 22 | 35 TCTCACACAGAAATCGCATTCCG   | miRNA | miR-342-3p  |
| t0012401 | 23 | 35 AAAAGCTGGGGTGTAGAGGGCGTA  | miRNA | miR-320d    |
| t0012486 | 23 | 35 AAAGCTGGGTTGAGAGGGCGGTT   | miRNA | miR-320d    |
| t0012517 | 23 | 35 AAAAGCTGGGTTGAGTGGGCGAA   | miRNA | miR-320a    |
| t0012488 | 23 | 35 AAAAGCTTGGTTGAGAGGGCGAT   | miRNA | miR-320a    |
| t0012372 | 24 | 35 GAATCTGAGAAGGCGCACAAAGGTT | miRNA | miR-3200-5p |
| t0012605 | 24 | 35 AGGTAGACGGAAAGAGAAATGGAG  | miRNA | miR-3190    |
| t0012665 | 23 | 35 TGTGGACAGTGAGGTAGAGGGAG   | miRNA | miR-3138    |
| t0012295 | 21 | 35 GCTGGTTTTACATGGTGGCTT     | miRNA | miR-29b-2*  |
| t0012434 | 21 | 35 CGCGGGTCGGGGGGCGGGGCG     | miRNA | miR-2981    |
| t0012287 | 24 | 35 TTAAGTAGTAGTGCCGTAGAGATC  | miRNA | miR-252b    |
| t0012302 | 21 | 35 CATTGCAATTGTCTCGGTCTG     | miRNA | miR-25      |
| t0012345 | 19 | 35 TCAGTTCAGCAGGAACAGT       | miRNA | miR-24      |
| t0012283 | 23 | 35 AAGCAGCTGTAGTGTATGCCTGG   | miRNA | miR-2278    |
| t0012547 | 21 | 35 CTGTGCGTGTGACAGCGGCTT     | miRNA | miR-210     |
| t0012572 | 21 | 35 TGGAGAGAAGGGCAGTTCCTG     | miRNA | miR-185     |
| t0012528 | 23 | 35 CAAAGTGCTTACAGTGCAGAAAA   | miRNA | miR-17a     |
| t0012631 | 22 | 35 TAGCAGCACGTAAATATTGCCA    | miRNA | miR-16b     |
| t0012239 | 20 | 35 TAGAAGCACGTAAATATTGG      | miRNA | miR-16      |
| t0012664 | 25 | 35 TAGCAGCACGTAAATATTGGCGACA | miRNA | miR-16      |
| t0012563 | 20 | 35 TAGCAGCACGGAAATATTGG      | miRNA | miR-16      |
| t0012550 | 22 | 35 TAGCAGCACGTAAATTTTGGCG    | miRNA | miR-16      |
| t0012349 | 19 | 35 TAGCAGCACGTCATGGTTT       | miRNA | miR-15b     |
| t0012502 | 19 | 35 TAGCATCACATCATGGTTT       | miRNA | miR-15b     |
| t0012505 | 21 | 35 TAGCAGCGCATAATGGTTTGT     | miRNA | miR-15a     |
| t0012545 | 21 | 35 TAGCAGAACATAATGGTTTGT     | miRNA | miR-15a     |
| t0012469 | 21 | 35 CCAGGAAGATCTTGTAGCATA     | miRNA | miR-1503    |
| t0012436 | 19 | 35 TCAGTGCATCACAGAACTT       | miRNA | miR-148b-3p |
| t0012583 | 19 | 35 TACAGTATAGATGATGTCT       | miRNA | miR-144     |
| t0012540 | 19 | 35 TCCATAAAGTAGAAAGCAC       | miRNA | miR-142-5p  |

|          |    |                                 |       |              |
|----------|----|---------------------------------|-------|--------------|
| t0012670 | 23 | 35 CATAAAGTAGAAAGCACTACTAA      | miRNA | miR-142-5p   |
| t0012337 | 22 | 35 TAGCACAGGGTAGAACCACGGA       | miRNA | miR-140      |
| t0012359 | 20 | 35 CCACAGGGTAGAACTACGGA         | miRNA | miR-140      |
| t0012444 | 26 | 35 ACCACAGGGTAGAACCACGGACGGAT   | miRNA | miR-140      |
| t0012566 | 27 | 35 ACCACAGGGTAGAACCACGGACCGGCC  | miRNA | miR-140      |
| t0012347 | 20 | 35 CCACCTCCCCTGCAAACGTC         | miRNA | miR-1306     |
| t0012365 | 20 | 35 CGGTTTGAGGCTACAGTGAG         | miRNA | miR-1304     |
| t0012279 | 20 | 35 AGCAGCATTGTACAGGGTAT         | miRNA | miR-107b     |
| t0012499 | 22 | 35 AGCAGCATTGTACAGGGCTAGT       | miRNA | miR-107      |
| t0012633 | 23 | 35 CCGCACTGTGGGTTACTTGCTGCT     | miRNA | miR-106b*    |
| t0012477 | 21 | 35 AGCAGCATTATACAGGGCTAT        | miRNA | miR-103a     |
| t0012543 | 19 | 35 AGCAGTATTGTACAGGGCT          | miRNA | miR-103a     |
| t0012260 | 22 | 35 TACAGTACTGTGATAACTGACG       | miRNA | miR-101c     |
| t0012524 | 22 | 35 TACATTACTGTGATAACTGAAG       | miRNA | miR-101      |
| t0012237 | 26 | 35 GTACAGTACTGTGATAACTGAACCCA   | miRNA | miR-101      |
| t0012348 | 19 | 35 TGAGGTAGTAGTCTGTGCT          | miRNA | let-7i       |
| t0012402 | 22 | 35 TGAGGTAGTAGTTTGTACAGCT       | miRNA | let-7g       |
| t0012590 | 22 | 35 GTTTGAGGTAGTAGATTGTATA       | miRNA | let-7f       |
| t0012570 | 20 | 35 TGACGTAGTAGATTGTATAG         | miRNA | let-7f       |
| t0012538 | 19 | 35 TGAGGTAGTAGATTGTACT          | miRNA | let-7f       |
| t0012432 | 20 | 35 AGAGGTAGTAGGGTGCATAG         | miRNA | let-7d       |
| t0012413 | 22 | 35 AGAGGTAGTAGGTTACATAGTT       | miRNA | let-7d       |
| t0012495 | 20 | 35 TGAGGTAGTAGGTTCTGTGG         | miRNA | let-7b       |
| t0012312 | 22 | 35 TGAAGTAGTAGGTTGTGTGGTT       | miRNA | let-7b       |
| t0012405 | 20 | 35 TGAGGTAGTAGGTCGTGTGG         | miRNA | let-7b       |
| t0012418 | 23 | 35 TTAGGTAGTAGGTTGTATAGTTG      | miRNA | let-7        |
| t0012440 | 22 | 35 TGAGATCATTGTGAAGGCCACT       | miRNA | bantam       |
| t0012624 | 22 | 34 CACCCGTAGAACCGACCTTGCG       | miRNA | miR-99b      |
| t0012252 | 23 | 34 TATTGCACTTGTCTGGCCTGTA       | miRNA | miR-92a      |
| t0012585 | 23 | 34 TATTGCACTCGTCCCGGCCTAAA      | miRNA | miR-92       |
| t0012266 | 21 | 34 TAGAGGAGATGGCGCAGGAAA        | miRNA | miR-877      |
| t0012530 | 20 | 34 GTAGAGGAGATGGCGCAGGG         | miRNA | miR-877      |
| t0012536 | 25 | 34 TGGAAGACTAGTGATTTTGTTAATC    | miRNA | miR-7b       |
| t0012308 | 22 | 34 TAGTACCAGTACCTTGTGTTCA       | miRNA | miR-624*     |
| t0012433 | 25 | 34 AAGGGATTCTGATGTTGGTCACATC    | miRNA | miR-541      |
| t0012564 | 29 | 34 TCCTGTACTGAGCTGCCCGAGACGGCA  | miRNA | miR-486-5p   |
| t0012592 | 30 | 34 AGGGCTGGGTCGGTCGGGCTGTGGCGCA | miRNA | miR-4651     |
| t0012673 | 22 | 34 AGGGCTGGGTCGGTCGGGCTGG       | miRNA | miR-4651     |
| t0012601 | 24 | 34 GAAAACCGTTACCATTACTGAGTT     | miRNA | miR-451      |
| t0012377 | 21 | 34 AAACCGTTACGATTACTGAGT        | miRNA | miR-451      |
| t0012953 | 24 | 34 TGAGGGGCAGAGAGCGAGACTTGT     | miRNA | miR-423-5p   |
| t0013050 | 19 | 34 ATAAGGAGAAAGCACTGTA          | miRNA | miR-3964     |
| t0012764 | 26 | 34 ACTGGACTTGGAGTCAGAAGGCTATC   | miRNA | miR-378      |
| t0012937 | 23 | 34 CTTTGAAGACTGAAGTGGAGAAG      | miRNA | miR-3526     |
| t0012956 | 23 | 34 TCACACAGAAATCGCACCCGTCG      | miRNA | miR-342-3p   |
| t0012678 | 24 | 34 TCTCACACAGAAATCGCACCCGTA     | miRNA | miR-342-3p   |
| t0012731 | 24 | 34 AAAAGCTGGGTTGAGAGGGCATT      | miRNA | miR-320d     |
| t0012762 | 23 | 34 AAAGCTGGGTTGAGAGGGCATT       | miRNA | miR-320d     |
| t0012964 | 23 | 34 AAAAGCTGCTTTGAGAGGGCGTT      | miRNA | miR-320d     |
| t0012794 | 22 | 34 AGAAGCTGGGTTGAGAGGGCGA       | miRNA | miR-320a     |
| t0012913 | 22 | 34 TGGAAGGTAGACGGCCAGAGAG       | miRNA | miR-3190     |
| t0012922 | 19 | 34 CAGTGCAATAGTATTGTCA          | miRNA | miR-301b-3p  |
| t0013080 | 19 | 34 GGGGGCGGGGCGGACTGT           | miRNA | miR-2885     |
| t0012755 | 26 | 34 TGGCTCAGTTCAGCAGTAACAGAATC   | miRNA | miR-24b      |
| t0012802 | 22 | 34 AGCTACATCTGGCTACTGGGTA       | miRNA | miR-222      |
| t0013027 | 22 | 34 TGACTGGGGCGGGACATCTGTT       | miRNA | miR-219-2-3p |
| t0013083 | 25 | 34 TGGAATGTATAGAAGTATGTATATC    | miRNA | miR-1a       |
| t0013104 | 21 | 34 CATGGAATCCCAAAGCAGCT         | miRNA | miR-191      |

|          |    |                               |       |             |
|----------|----|-------------------------------|-------|-------------|
| t0013106 | 25 | 34 CAACGGAATCCCAAAAGCAGCTGAA  | miRNA | miR-191     |
| t0012704 | 22 | 34 TGGAGAGAAAAGTAGTTCCTGA     | miRNA | miR-185     |
| t0012895 | 22 | 34 TGGACGGAGAAGCTGATAAGGGC    | miRNA | miR-184-3p  |
| t0012943 | 23 | 34 TGGACGGAGAAGCTGATAAGGGAA   | miRNA | miR-184     |
| t0013103 | 26 | 34 TGGGGGCGGGGAGCGGTCGGGCGGCG | miRNA | miR-1607    |
| t0012905 | 19 | 34 TAGCAGTACGTAATATTG         | miRNA | miR-16      |
| t0012897 | 21 | 34 TAGCAGCACATCATGGTTTTA      | miRNA | miR-15c     |
| t0012825 | 24 | 34 AAAATAGCAGCACATCATGGTTTTA  | miRNA | miR-15b     |
| t0012861 | 20 | 34 TAGCAACACATCATGGTTTTA      | miRNA | miR-15b     |
| t0013068 | 20 | 34 TAGCAGCACGTCATGGTTTTA      | miRNA | miR-15b     |
| t0012778 | 20 | 34 TAGCAGCACATCCTGGTTTTA      | miRNA | miR-15b     |
| t0012801 | 21 | 34 ATAGCAGCACATAATGGTTTTG     | miRNA | miR-15a     |
| t0012679 | 19 | 34 CTAGACTGAAGCTCCTTGA        | miRNA | miR-151-3p  |
| t0013009 | 25 | 34 TGAGAAGTGAATCCATAGGCTGTA   | miRNA | miR-146b    |
| t0012857 | 24 | 34 TACCACAGGGTAGAACCACGTACG   | miRNA | miR-140     |
| t0012996 | 23 | 34 ACCACAGGGTAGAATCACGGACG    | miRNA | miR-140     |
| t0013094 | 23 | 34 ACCACAGGGTACAACCACGGACA    | miRNA | miR-140     |
| t0012784 | 22 | 34 ACCACAGGGTAGAACCAAGGAA     | miRNA | miR-140     |
| t0012987 | 20 | 34 ACCACAGGGTACAACACTACGG     | miRNA | miR-140     |
| t0012991 | 26 | 34 ACCACAGGGTAGAACCACGGACGGCC | miRNA | miR-140     |
| t0012685 | 23 | 34 ACAGTGCAATGTTAAAGGGCAT     | miRNA | miR-130a    |
| t0012775 | 20 | 34 TTTGAGGCTACAGTGAGATG       | miRNA | miR-1304    |
| t0012903 | 18 | 34 TGTGAGGTTGGCATTGTT         | miRNA | miR-1294    |
| t0012929 | 24 | 34 TGGGAACGGGTTCCGGCAGACGCT   | miRNA | miR-1292    |
| t0013015 | 23 | 34 CGGATGAGCAAAGAAAGTGGTTA    | miRNA | miR-1255b   |
| t0012923 | 23 | 34 CTTCCCACCCTCTCCTGCAGTT     | miRNA | miR-1224-3p |
| t0012893 | 24 | 34 CCGCACTGTGGGTACTTGCTGAAA   | miRNA | miR-106b*   |
| t0012727 | 21 | 34 TAAAGTGCTGACAGTTCAGAT      | miRNA | miR-106b    |
| t0012761 | 23 | 34 AGCAGCATTATACAGGGCTATGA    | miRNA | miR-103a    |
| t0012797 | 24 | 34 CAGTACAGTACTGTGATAACTGAA   | miRNA | miR-101     |
| t0012865 | 19 | 34 TCAGGTAGTAGTTTGTGCT        | miRNA | let-7i      |
| t0013000 | 20 | 34 TGAGGTAGTAGTTTGTGGTT       | miRNA | let-7i      |
| t0013105 | 22 | 34 TGAGGAAGTAGTTTGTGCTGTT     | miRNA | let-7i      |
| t0012951 | 18 | 34 TGAGGTAGTAGATTGCAT         | miRNA | let-7f      |
| t0012725 | 21 | 34 CTATACAACCTACTGCCTTCA      | miRNA | let-7b*     |
| t0012686 | 25 | 34 TGAGGTAGTAGGTTGTGTGGTTGAT  | miRNA | let-7b      |
| t0012901 | 21 | 34 AGAGGTAGTAGGTTGTGTGGT      | miRNA | let-7b      |
| t0013045 | 20 | 34 TGAGGTAGTAGGTTGTGTGG       | miRNA | let-7b      |
| t0012763 | 22 | 34 TGAGGGGGTAGGTTGTGTGGTT     | miRNA | let-7b      |
| t0012894 | 23 | 34 TGAGGTTGTAGGTTGTGTGGTTA    | miRNA | let-7b      |
| t0012948 | 20 | 34 TGAGGTAGTAGGTTGTCTGG       | miRNA | let-7b      |
| t0013117 | 22 | 34 TGAGGTAGTAGGTTGTATGGTA     | miRNA | let-7-5p    |
| t0012696 | 22 | 34 TGAGGTAGTAGGTTGTATAGTC     | miRNA | let-7-5p    |
| t0012821 | 22 | 34 TGAGGTAGTAGGTTGAATAGTT     | miRNA | let-7       |
| t0013063 | 21 | 34 TGAGGTAGTAGGTTGTAAAGT      | miRNA | let-7       |
| t0013073 | 20 | 34 TAGGTAGTAGGTTGTATAGT       | miRNA | let-7       |
| t0012975 | 22 | 34 TCAGGTAGTAGGTTGTATAGTT     | miRNA | let-7       |
| t0012823 | 21 | 34 TGAGGTAGTAGGTTGAATAGT      | miRNA | let-7       |
| t0012676 | 18 | 33 GCACTTGTCCCGGCCTGT         | miRNA | miR-92c     |
| t0012682 | 22 | 33 ATTGCACCTGTCCCGGCCTGTA     | miRNA | miR-92b-3p  |
| t0013022 | 20 | 33 TATTGCACTTGTCCCGGCGT       | miRNA | miR-92a     |
| t0013066 | 21 | 33 AAAAGTAATTGCGGTCTTTGG      | miRNA | miR-548j    |
| t0013121 | 21 | 33 TTCCCACACCCAAGGCTTGCA      | miRNA | miR-532-3p  |
| t0013125 | 23 | 33 TCCTGTATTGAGCTGCCCGAGA     | miRNA | miR-486-5p  |
| t0012702 | 22 | 33 TCCTGTAAGTACTGAGCTGCCCGTG  | miRNA | miR-486-5p  |
| t0012836 | 23 | 33 TTTTGTACTGAGCTGCCCGAGA     | miRNA | miR-486-5p  |
| t0013064 | 21 | 33 TCCTGTAAGTACTGAGCTGCCCGGA  | miRNA | miR-486-5p  |
| t0013075 | 22 | 33 TCCTATACTGAGCTGCCCGAG      | miRNA | miR-486-5p  |

|          |    |                                  |       |             |
|----------|----|----------------------------------|-------|-------------|
| t0013076 | 22 | 33 TCGGGCGGAGGTGGTTGAGTGT        | miRNA | miR-4750    |
| t0013087 | 21 | 33 TTACACAGCTGGACAGAGGCA         | miRNA | miR-4672    |
| t0013126 | 21 | 33 AAACCGATACCATTACTGAGT         | miRNA | miR-451     |
| t0013474 | 19 | 33 AAGCGTTACCATTACTGAG           | miRNA | miR-451     |
| t0013427 | 22 | 33 TAAACCGTTACCATTACTGAGT        | miRNA | miR-451     |
| t0013392 | 26 | 33 AAAAACCGTTACCATTACTGAGTTTA    | miRNA | miR-451     |
| t0013169 | 25 | 33 AAACCGTTACCATTACTGAGTTACA     | miRNA | miR-451     |
| t0013521 | 22 | 33 AAACCGTTGCCATTACTGAGTT        | miRNA | miR-451     |
| t0013155 | 20 | 33 TTCGGGGTCTGGGCGCGGTT          | miRNA | miR-4508    |
| t0013402 | 22 | 33 TGAGGGGCAGAGAGCGAGACAA        | miRNA | miR-423-5p  |
| t0013444 | 21 | 33 TGAGGGGCAGAGTGCAGACT          | miRNA | miR-423-5p  |
| t0013457 | 23 | 33 TGAGGGGCAGATAGCGAGACTTA       | miRNA | miR-423-5p  |
| t0013505 | 21 | 33 ACTGAAACGGACAAGGGGAAT         | miRNA | miR-3896-3p |
| t0013611 | 23 | 33 ACTGGACTTGGAGTCAGAAGGAT       | miRNA | miR-378c    |
| t0013398 | 22 | 33 CTGGACTTGGAGTCAGAAGGCC        | miRNA | miR-378     |
| t0013176 | 23 | 33 TCTCACACAGAAATCGCACCTGT       | miRNA | miR-342-3p  |
| t0013312 | 25 | 33 AAAAGCTGGGTTGAGAGGGCGTAAA     | miRNA | miR-320d    |
| t0013372 | 23 | 33 AAAAGTCGGGTTGAGAGGGCGAA       | miRNA | miR-320c    |
| t0013418 | 22 | 33 AAACGCTGGGTTGAGAGGGCGA        | miRNA | miR-320a    |
| t0013422 | 23 | 33 AAAAGCTGGGTTGAGAGGGCGAA       | miRNA | miR-320a    |
| t0013461 | 23 | 33 AAAGCTGGGTTGAGAGGGCGAAT       | miRNA | miR-320a    |
| t0013514 | 27 | 33 TGTA AACATCCTT GACTGGAAGCTATC | miRNA | miR-30e     |
| t0013221 | 23 | 33 CACTAGATTGTGAGCTCCTGGAA       | miRNA | miR-28-3p   |
| t0013429 | 23 | 33 TTCAAGTAATTCAGGATAGGTAA       | miRNA | miR-26b     |
| t0013581 | 22 | 33 TTCAAGTAACCCAGGATAGGCT        | miRNA | miR-26a     |
| t0013234 | 22 | 33 TTCAAGTAATCCAGAATAGGCT        | miRNA | miR-26a     |
| t0013197 | 21 | 33 AGGCGGAGACTTGGGCAATTT         | miRNA | miR-25*     |
| t0013343 | 22 | 33 AAGCTGCTAGTTGAAGAACTGT        | miRNA | miR-22-3p   |
| t0013447 | 22 | 33 CTGTGCGTGTGACAGCGGCTAA        | miRNA | miR-210     |
| t0013173 | 21 | 33 TCTACTGTAGTATGGGCACTT         | miRNA | miR-20b*    |
| t0013302 | 21 | 33 CCTGACCTATGAATTGACAGC         | miRNA | miR-192     |
| t0013353 | 25 | 33 CAACGGAATCCAAAAGCAGCTGTA      | miRNA | miR-191     |
| t0013404 | 22 | 33 CAACGGAATACAAAAGCAGCT         | miRNA | miR-191     |
| t0013548 | 20 | 33 AACGGAATCCCAAAGCAGC           | miRNA | miR-191     |
| t0013235 | 23 | 33 TGGGGAGAAAGGCAGTTCCTGAA       | miRNA | miR-185     |
| t0013567 | 19 | 33 TAGCCCGTAAATATTGGCG           | miRNA | miR-16c     |
| t0013485 | 26 | 33 TAGCAGCACGTAATATTGGCGTTAT     | miRNA | miR-16      |
| t0013285 | 21 | 33 TAGCAGCACGTAATATTTCGT         | miRNA | miR-16      |
| t0013557 | 22 | 33 TAGCTGCACGTAATATTGGCG         | miRNA | miR-16      |
| t0013510 | 20 | 33 TAGCAGCACATCATGGTTTG          | miRNA | miR-15b     |
| t0013430 | 19 | 33 TAGCAGCACATCATGGTAC           | miRNA | miR-15b     |
| t0013549 | 20 | 33 TAGCAGCAGATAATGGTTTG          | miRNA | miR-15a     |
| t0013578 | 22 | 33 TAGCAGCACATAATGGTTGTGG        | miRNA | miR-15a     |
| t0013554 | 21 | 33 TCAGTGTACTACAGA ACTTTG        | miRNA | miR-148a    |
| t0013321 | 24 | 33 TGAGA ACTGAATCCATAGGCTAT      | miRNA | miR-146b-5p |
| t0013327 | 22 | 33 CATAAAGTAGAAAGCACTACTA        | miRNA | miR-142-5p  |
| t0013546 | 23 | 33 ACCACAGTGTAGAACCACGGACG       | miRNA | miR-140     |
| t0013207 | 23 | 33 TACCACAGGGTAGAACCTCGGAT       | miRNA | miR-140     |
| t0013210 | 23 | 33 TACCACAGGGTAGAACCTCGGAC       | miRNA | miR-140     |
| t0013345 | 23 | 33 ACCACAGGGTAGAACACGGAGG        | miRNA | miR-140     |
| t0013532 | 22 | 33 ACCACAGGGAAGAACCACGGAC        | miRNA | miR-140     |
| t0013601 | 22 | 33 AACCACAGGGTAGAACACGGA         | miRNA | miR-140     |
| t0013476 | 22 | 33 GCAGTGAATGTTAAAAGGGCA         | miRNA | miR-130a    |
| t0013524 | 22 | 33 AGCAGCATTGTACAGGGCTTAT        | miRNA | miR-107b    |
| t0013367 | 22 | 33 AGCAGCATTGTATAGGGCTATT        | miRNA | miR-107     |
| t0013439 | 22 | 33 TACCGCACTGTGGGTA CTTGTA       | miRNA | miR-106b*   |
| t0013527 | 22 | 33 TCGCACTGTGGGTA CTTGCTGA       | miRNA | miR-106b*   |
| t0013206 | 23 | 33 AGCAGCATTGTACAGGGCTAAGT       | miRNA | miR-103a    |

|          |    |                                  |       |             |
|----------|----|----------------------------------|-------|-------------|
| t0013313 | 26 | 33 AGCAGCATTGTACAGGGCTATGATAA    | miRNA | miR-103a    |
| t0013149 | 23 | 33 AGCAGCATTGGACAGGGCTATGA       | miRNA | miR-103a    |
| t0013160 | 23 | 33 AGTAGCATTGTACAGGGCTATGA       | miRNA | miR-103a    |
| t0013178 | 21 | 33 AGCAACATTGTACAGGGCTAT         | miRNA | miR-103a    |
| t0013231 | 21 | 33 TACAGTACTGTGATAACTCAC         | miRNA | miR-101c    |
| t0013572 | 21 | 33 TACAGTACTGGGATAACTGAA         | miRNA | miR-101     |
| t0013594 | 19 | 33 TGAGGTAGTAGTTTTTGCT           | miRNA | let-7i      |
| t0013183 | 22 | 33 TGAGGTAGGAGTTTGTGCTGTT        | miRNA | let-7i      |
| t0013331 | 22 | 33 TGAGGTAGGAGTTTGTACAGTT        | miRNA | let-7g      |
| t0013560 | 22 | 33 TGAGGTAGTAGTTTGTACACTT        | miRNA | let-7g      |
| t0013145 | 21 | 33 TGAGGAGGTAGATTGTATAGT         | miRNA | let-7f      |
| t0013568 | 23 | 33 TGAGGTAGTAGATTGTATATTTG       | miRNA | let-7f      |
| t0013196 | 19 | 33 TGAAGTAGGTTGTGTGGTT           | miRNA | let-7b      |
| t0013237 | 22 | 33 TGAGGTAGTAGGTTGTATAGAG        | miRNA | let-7-5p    |
| t0013525 | 25 | 33 TGAGGTAGTAGGTTGTATGGTAATC     | miRNA | let-7-5p    |
| t0013577 | 19 | 33 TGATGTAGTAGGTTGTATA           | miRNA | let-7       |
| t0013609 | 25 | 32 CAAAGTGCTGTTCTGTCAGGTA AAA    | miRNA | miR-93      |
| t0013198 | 23 | 32 TATTGCACTTGTCCCGCCTGAG        | miRNA | miR-92b-3p  |
| t0013303 | 22 | 32 TATTGCACTTGTCCCGGCCATA        | miRNA | miR-92b     |
| t0013143 | 20 | 32 AGGTTGGGATCGGTTGCAAT          | miRNA | miR-92a-1*  |
| t0013355 | 22 | 32 ATATTGCACTTGTCCCGCCTG         | miRNA | miR-92a     |
| t0013305 | 20 | 32 TATTGCACTTGTCCCGGCAT          | miRNA | miR-92a     |
| t0013555 | 20 | 32 TTCATTGCATATCGGAGTTG          | miRNA | miR-660     |
| t0013188 | 21 | 32 CCTCCACACCCAAGGCTTGA          | miRNA | miR-532-3p  |
| t0013596 | 23 | 32 TGGGCACAGGCGGATGGACAGGT       | miRNA | miR-5107    |
| t0013262 | 26 | 32 GGGTCTGTAGCTCAGGTGGTTATAGC    | miRNA | miR-5106    |
| t0013154 | 22 | 32 GGGAGTGCAGGGCAGGGTTTCC        | miRNA | miR-504*    |
| t0013488 | 18 | 32 TAGCAGCGGGAACAGTTC            | miRNA | miR-503     |
| t0013171 | 25 | 32 TCCTGTA CTGAGCTGCCCCGAGACG    | miRNA | miR-486-5p  |
| t0013814 | 22 | 32 TCCTGTA CTGCGCTGCCCCGAG       | miRNA | miR-486-5p  |
| t0013911 | 28 | 32 TCCTGTA CTGAGCTGCCCCGAGCCCGCA | miRNA | miR-486-5p  |
| t0013827 | 18 | 32 TCGTA CTGAGCTGCCCCG           | miRNA | miR-486-5p  |
| t0013793 | 25 | 32 TCCTGTA CTGAGCTGCCCCGACGGG    | miRNA | miR-486-5p  |
| t0013733 | 21 | 32 GGGCTGGGTCGGTCGGGCTGG         | miRNA | miR-4651    |
| t0013997 | 22 | 32 GGGGGGAGAAGGGTCGGGGCGG        | miRNA | miR-4516    |
| t0014055 | 21 | 32 AAACCGTTACCATTGCTGAGT         | miRNA | miR-451     |
| t0013826 | 23 | 32 AAACCGTTACCATTAGTGAGTTT       | miRNA | miR-451     |
| t0013957 | 25 | 32 AAACAAACCGTTACCATTACTGAGA     | miRNA | miR-451     |
| t0013917 | 25 | 32 AAACCTTACCATTACTGAGTTTAG      | miRNA | miR-451     |
| t0013705 | 21 | 32 GCAGGCAGAAGGAAGCAGTGG         | miRNA | miR-4419b   |
| t0014059 | 19 | 32 TCCCACTGCTTCACTTGAC           | miRNA | miR-4301    |
| t0013643 | 19 | 32 AATGACACGATCACTCCCG           | miRNA | miR-425     |
| t0013672 | 19 | 32 TGAGGGGCAGAGATCGAGA           | miRNA | miR-423-5p  |
| t0013838 | 21 | 32 TGAGGGGCAGAGAGCGAGTTT         | miRNA | miR-423-5p  |
| t0013979 | 22 | 32 CTGAGGGGCAGAGAGCGAGACT        | miRNA | miR-423-5p  |
| t0014014 | 23 | 32 TGGACTTGGAGTCAGAAGGCATC       | miRNA | miR-378     |
| t0013765 | 22 | 32 ATATAATACAACCTGCTAATTG        | miRNA | miR-374     |
| t0013653 | 19 | 32 TGATGATACAGGTGGAGGT           | miRNA | miR-3682-3p |
| t0013963 | 22 | 32 ATGAGGATGGATAGCAAGGAAG        | miRNA | miR-3605-5p |
| t0014051 | 20 | 32 AAGTAGTAGGTTGCATAGTT          | miRNA | miR-352     |
| t0014061 | 23 | 32 TCACACAGAAATCGCACCCGTAA       | miRNA | miR-342-3p  |
| t0014064 | 25 | 32 AAAAGCTGGGTTGAGAGGGCAATTT     | miRNA | miR-320b    |
| t0014117 | 20 | 32 CTTTCAGTCGGATGTTTATA          | miRNA | miR-30b-3p  |
| t0013767 | 26 | 32 CATTGCACTTGTCTCGGTCTGACAAG    | miRNA | miR-25      |
| t0013868 | 20 | 32 TGGGGTTCCTGGGGATGGGA          | miRNA | miR-23a*    |
| t0013704 | 25 | 32 TGTAACAGCAACTCCATGTGGAATC     | miRNA | miR-194     |
| t0013773 | 21 | 32 CTGGGAATTGTAGTTCGGGTC         | miRNA | miR-1938    |
| t0013809 | 22 | 32 AACGGAATCCCAAAGCCGCTG         | miRNA | miR-191     |

|          |    |                                |       |              |
|----------|----|--------------------------------|-------|--------------|
| t0014066 | 21 | 32 AACGGAATCCCAAAGCACCT        | miRNA | miR-191      |
| t0014111 | 23 | 32 TGGAGAGAAAGGGAGTTCCTGAA     | miRNA | miR-185      |
| t0014104 | 23 | 32 TGGAGAGAAAGGCGTTCCTGAA      | miRNA | miR-185      |
| t0014048 | 21 | 32 AGACCTACTTACTTACCAACA       | miRNA | miR-1839-3p  |
| t0013717 | 26 | 32 AACATTCATTGCTGTCGGTGGGTATC  | miRNA | miR-181b     |
| t0013961 | 23 | 32 ACATTCATTGCTGTCGGTGGGTT     | miRNA | miR-181b     |
| t0014110 | 21 | 32 CTGCAGTGAAGGCACTTGTAG       | miRNA | miR-17*      |
| t0013970 | 19 | 32 TAGCAGCACATCTTGGTTT         | miRNA | miR-15b      |
| t0013655 | 20 | 32 GCAGCACATCATGGTTTACA        | miRNA | miR-15b      |
| t0013878 | 20 | 32 TAGCAGCGCATCATGGTTTA        | miRNA | miR-15b      |
| t0013978 | 19 | 32 GGATATCATCATATACTGT         | miRNA | miR-144*     |
| t0014007 | 24 | 32 GGATATCATCATATACTGTAAGTA    | miRNA | miR-144*     |
| t0013871 | 27 | 32 TGAGATGAAGCACTGTAGCTCTTTATC | miRNA | miR-143      |
| t0014038 | 22 | 32 TACCACAGGGTAGAACCACGAC      | miRNA | miR-140      |
| t0013906 | 23 | 32 TACCACGGGGTAGAACCACGGAC     | miRNA | miR-140      |
| t0013912 | 23 | 32 TACCACAGGGTAGAACCACGGGA     | miRNA | miR-140      |
| t0013790 | 23 | 32 TACCACAGGGTAGAACCACTGAA     | miRNA | miR-140      |
| t0013685 | 25 | 32 TGGAGACGCGGCCCTGTTGGAGATC   | miRNA | miR-139*     |
| t0013930 | 24 | 32 CGTACCGTGAGTAATAATGCGATC    | miRNA | miR-126      |
| t0013805 | 20 | 32 TTTCCGGCTCGCGTGGGTGT        | miRNA | miR-1180     |
| t0013641 | 23 | 32 AGCAGCATTGTACAGGGCTATTA     | miRNA | miR-107      |
| t0013803 | 25 | 32 AGCAGCATTGTACAGGGCTATAAAC   | miRNA | miR-107      |
| t0013895 | 21 | 32 AGCAGCACTGTACAGGGCTAT       | miRNA | miR-103a     |
| t0013981 | 21 | 32 AGCAGCATTTTACAGGGCTAT       | miRNA | miR-103a     |
| t0014008 | 27 | 32 TACAGTACTGTGATAACTGAACGCGGC | miRNA | miR-101      |
| t0014006 | 20 | 32 TGAGGTAGTAGTTTTTGCTG        | miRNA | let-7i       |
| t0013675 | 19 | 32 TGAGGTAGTAGGTTGTGCT         | miRNA | let-7i       |
| t0013718 | 26 | 32 TGAGGTAGTAGATTGTATAGTTCTTG  | miRNA | let-7f       |
| t0013785 | 18 | 32 TGAGGTAGTAGTTTGTCT          | miRNA | let-7f       |
| t0014098 | 22 | 32 AGAGGTAGGAGTTGCATAGTT       | miRNA | let-7d       |
| t0013866 | 22 | 32 GGAGGTAGTAGTTGCATAGTT       | miRNA | let-7d       |
| t0014072 | 19 | 32 TGAGGTAGTAGGTTGTTAG         | miRNA | let-7b       |
| t0013903 | 24 | 32 TGATGTAGTAGGTTGTGTGGTTAA    | miRNA | let-7b       |
| t0013662 | 21 | 32 GGAGGTAGTAGGTTGTATAGT       | miRNA | let-7        |
| t0014042 | 21 | 32 TAGGTAGTAGGTTGTATAGTT       | miRNA | let-7        |
| t0013682 | 22 | 31 CTATACAACTTACTACTTTCCT      | miRNA | miR-98*      |
| t0013745 | 19 | 31 TGAGGTAGTAAGTTGTATT         | miRNA | miR-98       |
| t0014057 | 20 | 31 GGTGGAAGGTTGTAGGCATG        | miRNA | miR-965-5p   |
| t0013738 | 26 | 31 AGGGCGCGCGGGTTCGGGCGGCGGCC  | miRNA | miR-638      |
| t0013857 | 22 | 31 TTATGGTTTGCCTGGGACTGAT      | miRNA | miR-584      |
| t0013831 | 19 | 31 TAGCAGCGGGAACAGTTGA         | miRNA | miR-503      |
| t0013966 | 23 | 31 ATGCACCTGGGCAAGGATTCAGA     | miRNA | miR-500a*    |
| t0013988 | 20 | 31 TCCTGTACTIONACTTGCCTCCG     | miRNA | miR-486-5p   |
| t0014054 | 22 | 31 TCCTGTCCTGAGCTGCCCGAG       | miRNA | miR-486-5p   |
| t0013737 | 27 | 31 TCCTGTACTIONACTTGCCTCCG     | miRNA | miR-486-5p   |
| t0014091 | 21 | 31 TCTTCTTAGACATGGCAACGT       | miRNA | miR-4659a-3p |
| t0013751 | 26 | 31 GGGCTGGGTCGGTCGGGCTGGGGCGC  | miRNA | miR-4651     |
| t0014100 | 18 | 31 AAGGGCTGGGTCGGTCCG          | miRNA | miR-4651     |
| t0014446 | 19 | 31 GTCGCGTGCTGTTTCGTCGG        | miRNA | miR-4573     |
| t0014479 | 23 | 31 ATTCGACTCTGGATAGCTGGTTT     | miRNA | miR-4538     |
| t0014578 | 21 | 31 GAACCGTTACCATTACTGAGT       | miRNA | miR-451      |
| t0014428 | 23 | 31 ATGGCCAGAGCTCACACAGAGGA     | miRNA | miR-4435     |
| t0014135 | 19 | 31 ATGACACGATCACTCCCGT         | miRNA | miR-425-5p   |
| t0014286 | 21 | 31 ATCGGGAATGTCGTGTCCGCC       | miRNA | miR-425*     |
| t0014172 | 23 | 31 AGAGGGGCAGAGAGCGAGACTTT     | miRNA | miR-423-5p   |
| t0014144 | 21 | 31 CCTCGAAGTGTGTGGCCATT        | miRNA | miR-3487     |
| t0014160 | 24 | 31 TCCTCGAAGTGTGTGGCCATTT      | miRNA | miR-3487     |
| t0014273 | 24 | 31 CACCTTGCCTACTCAGGTCTGAG     | miRNA | miR-3200-3p  |

|          |    |                                  |       |            |
|----------|----|----------------------------------|-------|------------|
| t0014290 | 24 | 31 CTTTCAGTCGGATGTTTACAGCAG      | miRNA | miR-30e*   |
| t0014142 | 21 | 31 TTCACAGTGGCTAAGTTCCGA         | miRNA | miR-27a    |
| t0014362 | 22 | 31 TTCAAGTAATCCAGGATCGGCT        | miRNA | miR-26a    |
| t0014270 | 23 | 31 CATTGCACTTGTCTCGGTCTGAC       | miRNA | miR-25     |
| t0014211 | 21 | 31 CAAAGTGCTCATAGTGCAGGT         | miRNA | miR-20b    |
| t0014244 | 26 | 31 CAACGGAATCCCAAAAGCAGCAAAAG    | miRNA | miR-191    |
| t0014552 | 22 | 31 TAACGGAATCCGAAAAGCAGCT        | miRNA | miR-191    |
| t0014148 | 22 | 31 CAACAGAATCCCAAAAGCAGCT        | miRNA | miR-191    |
| t0014344 | 22 | 31 CAACGGAATCCCCAAGCAGCT         | miRNA | miR-191    |
| t0014439 | 27 | 31 TGGAGAGAAAGGCAGTTCCTGAACGTT   | miRNA | miR-185    |
| t0014220 | 21 | 31 TGGAGCGAAAGGCAGTTCCTG         | miRNA | miR-185    |
| t0014243 | 20 | 31 AGGTAGATAGAACAGGTTTG          | miRNA | miR-1839   |
| t0014324 | 22 | 31 TGAGGGAGTAGATTGTATAGTA        | miRNA | miR-1827   |
| t0014471 | 25 | 31 AAGCGGCGATGGCGGAGCTGAATTA     | miRNA | miR-1636   |
| t0014548 | 24 | 31 GCGGGGAGCGGTGCGGGCGGCGGCG     | miRNA | miR-1607   |
| t0014183 | 19 | 31 TAGCAGCACGTAATTATTG           | miRNA | miR-16     |
| t0014228 | 21 | 31 AATAGCAGCACATCATGGTTT         | miRNA | miR-15b    |
| t0014266 | 19 | 31 TAGCAGGACATCATGGTTT           | miRNA | miR-15b    |
| t0014259 | 20 | 31 AGCAGCACATCATGGTTTAA          | miRNA | miR-15b    |
| t0014359 | 19 | 31 TAGCAGCACATCATCGTTT           | miRNA | miR-15b    |
| t0014417 | 23 | 31 TAGCAGCACATCATGGTTTACAT       | miRNA | miR-15b    |
| t0014559 | 18 | 31 TAGCAGCACATCATGGGT            | miRNA | miR-15b    |
| t0014159 | 19 | 31 TAGCAGCACTTAATGGTTT           | miRNA | miR-15a    |
| t0014427 | 26 | 31 CTAGACTGAGGCTCCTTGAGGATATC    | miRNA | miR-151-3p |
| t0014420 | 19 | 31 GTCCAGTTTTCCAGGAAT            | miRNA | miR-145    |
| t0014410 | 20 | 31 AATACAGTATAGATGATGTA          | miRNA | miR-144    |
| t0014325 | 21 | 31 TACAGTATAGATGATGATTTT         | miRNA | miR-144    |
| t0014168 | 20 | 31 CATAAAGTAGAAAGCACTAT          | miRNA | miR-142-5p |
| t0014573 | 20 | 31 CTCATAAAGTAGAAAGCACT          | miRNA | miR-142-5p |
| t0014129 | 23 | 31 TACCACAGGTTAGAACCACGGAC       | miRNA | miR-140    |
| t0014349 | 23 | 31 TATCACAGGTTAGAACCACGGAC       | miRNA | miR-140    |
| t0014358 | 23 | 31 ACCACAGGTTAGAACCACGGTTT       | miRNA | miR-140    |
| t0014360 | 23 | 31 TACCACAGGGAAGAACCACGGAC       | miRNA | miR-140    |
| t0014454 | 23 | 31 TCTGGGCAACAAAGTGAGACCTA       | miRNA | miR-1285   |
| t0014509 | 20 | 31 AGCAGCATTGTACAAGGCTA          | miRNA | miR-103a   |
| t0014425 | 22 | 31 AGCAGCATTGTACAGAGCTATG        | miRNA | miR-103a   |
| t0014261 | 22 | 31 TGAGGTAGTAGGTTGTGCTGTT        | miRNA | let-7i     |
| t0014368 | 22 | 31 TGAGGTAGTAGTTTGTCCAGTT        | miRNA | let-7g     |
| t0014319 | 22 | 31 TGAGGTAGTAGATTGTATACCT        | miRNA | let-7f-5p  |
| t0014489 | 20 | 31 ATGAGGTAGTAGATTGTATA          | miRNA | let-7f     |
| t0014413 | 25 | 31 TTAGGTAGTAGATTGTATAGTTATC     | miRNA | let-7f     |
| t0014537 | 22 | 31 TGAGGTAGTAGATATTATAGTT        | miRNA | let-7f     |
| t0014237 | 22 | 31 TGACGTAGTAGATTGTGTAGTT        | miRNA | let-7f     |
| t0014341 | 21 | 31 AGGTAGTAGATTGTATAGTTA         | miRNA | let-7f     |
| t0014393 | 21 | 31 TGAGGTAGTAGGGTTTGTGGT         | miRNA | let-7b     |
| t0014469 | 26 | 31 TGAGGTAGTAGGTTGTGTGGTTTTAT    | miRNA | let-7b     |
| t0014180 | 21 | 31 TGAGGTAGTAGGTTGGTTGGT         | miRNA | let-7b     |
| t0014415 | 22 | 31 TGAGGTAGTAGGTTGTATAGAT        | miRNA | let-7      |
| t0014477 | 26 | 31 TGAGGTAGTAGGTTGTATAGTTAATC    | miRNA | let-7      |
| t0014416 | 21 | 30 CTATACAACCTACTACTTTCT         | miRNA | miR-98*    |
| t0014585 | 29 | 30 AGGTGGAAGGTTGTAGGCATGTATCTTAC | miRNA | miR-965-5p |
| t0014581 | 23 | 30 TTTGGCACTAGCACATTTTTGCT       | miRNA | miR-96     |
| t0014343 | 22 | 30 GGGCAGGTGCTGTAGTGGTATC        | miRNA | miR-885    |
| t0014434 | 22 | 30 GTAGAGGAGATGGCGCAGGACA        | miRNA | miR-877    |
| t0014468 | 25 | 30 AATTTGTATTGTGACTGGCATTTTT     | miRNA | miR-753c   |
| t0014480 | 22 | 30 TCCTGTA CTGACCTGCCCCGAG       | miRNA | miR-486-5p |
| t0014507 | 28 | 30 TCCTGTA CTGAGCTGCCCTGAGACGGCT | miRNA | miR-486-5p |
| t0014354 | 25 | 30 TCCTGTA CTGAGCTGCCCCGAGGAC    | miRNA | miR-486-5p |

|          |    |                                  |       |              |
|----------|----|----------------------------------|-------|--------------|
| t0014388 | 24 | 30 TCTTGTACTGAGCTGCCCCGAGAA      | miRNA | miR-486-5p   |
| t0014407 | 21 | 30 TCCGTACTGAGCTGCCCCGAG         | miRNA | miR-486-5p   |
| t0014422 | 21 | 30 CCCTGTACTGAGCTGCCCCGA         | miRNA | miR-486-5p   |
| t0014520 | 24 | 30 TCCTGTACTGAGCTGCCCCGACAA      | miRNA | miR-486-5p   |
| t0014925 | 18 | 30 TGAGGGAAGGAGGCTTGG            | miRNA | miR-4747-5p  |
| t0014604 | 25 | 30 GGCTGGGTCGGTCGGGCTGGGGCGC     | miRNA | miR-4651     |
| t0014747 | 20 | 30 GGAGAAGGGTCGGGGCGTTT          | miRNA | miR-4516     |
| t0014872 | 21 | 30 CGTTACCATTACTGAGTAAAC         | miRNA | miR-451      |
| t0014979 | 29 | 30 AAACCGTTACCATTACTGAGTTGTAGTTG | miRNA | miR-451      |
| t0014953 | 20 | 30 AAACCGTTACCATTCTGAG           | miRNA | miR-451      |
| t0014690 | 23 | 30 AAACCGTTACCATTACTGAGAAA       | miRNA | miR-451      |
| t0014734 | 21 | 30 TGGAGAGAAAGGCAGTGTTTG         | miRNA | miR-4306     |
| t0014749 | 21 | 30 GGCAGCATTGTACAGGGCTAT         | miRNA | miR-4289     |
| t0014800 | 21 | 30 CAAAACGTGAGGCGCTGCTAT         | miRNA | miR-424*     |
| t0014860 | 19 | 30 TGAGGGGCAGAGAGCGACT           | miRNA | miR-423-5p   |
| t0014959 | 23 | 30 TGAGGGGCTGAGAGCGAGACTTA       | miRNA | miR-423-5p   |
| t0014992 | 22 | 30 TGAGGGGCAGAGAGCGAGACTC        | miRNA | miR-423-5p   |
| t0015058 | 23 | 30 GGAGGGGCAGAGAGCGAGACTTT       | miRNA | miR-423-5p   |
| t0014777 | 20 | 30 TGAGGGGCAGATAGCGAGAC          | miRNA | miR-423-5p   |
| t0014665 | 21 | 30 TTGAGGGGCAGAGAGCGAGAC         | miRNA | miR-423-5p   |
| t0014648 | 23 | 30 TGGACTCGCAGGAACAGGCCTTT       | miRNA | miR-4001b-5p |
| t0014794 | 25 | 30 GGAGGAACCTTGAGCTTCGGCTAT      | miRNA | miR-3928     |
| t0014944 | 20 | 30 GAACTGAAGCGGACAAGGGG          | miRNA | miR-3896-3p  |
| t0015060 | 23 | 30 TCCTCGAACTGTTGTGGCCAATT       | miRNA | miR-3487     |
| t0014736 | 24 | 30 AAAGCTGGGTTGAGAGGGCGAAAT      | miRNA | miR-320a     |
| t0014599 | 23 | 30 TAGCACCATTTGAAATCGGTAA        | miRNA | miR-29c      |
| t0014911 | 19 | 30 CGGGGGGCGGGGCGGACTG           | miRNA | miR-2885     |
| t0014634 | 18 | 30 TTCACAGTGGCTAAGTTC            | miRNA | miR-27b      |
| t0014780 | 20 | 30 CATTGCACTTGTCTCGGTTT          | miRNA | miR-25       |
| t0014835 | 29 | 30 CATTGCACTTGTCTCGGTCTGAAAATCAT | miRNA | miR-25       |
| t0014914 | 21 | 30 ATCACATTGCCAGGGATAAAA         | miRNA | miR-23b      |
| t0014983 | 20 | 30 ACTGTAGTATGGGCACTTTT          | miRNA | miR-20b*     |
| t0015069 | 19 | 30 TTATGCATATACTTCTTTG           | miRNA | miR-202-5p   |
| t0014755 | 21 | 30 TGACCTATGAATTGACAGCCT         | miRNA | miR-192      |
| t0015011 | 20 | 30 AAGGTAGATAGAACAGGTTG          | miRNA | miR-1839     |
| t0015008 | 24 | 30 ATGGCACTGGTAGAATTCACATC       | miRNA | miR-183      |
| t0014810 | 19 | 30 AACATTCATTGCTGTCGGA           | miRNA | miR-181b     |
| t0014926 | 22 | 30 AATAGCAGCACATCATGGTTTA        | miRNA | miR-15b      |
| t0014980 | 20 | 30 TACCAGCACATCATGGTTTA          | miRNA | miR-15b      |
| t0014948 | 22 | 30 TAGCAGCACATCATGGATTACA        | miRNA | miR-15b      |
| t0014658 | 22 | 30 TAGCAGCACATAATGGTTTACA        | miRNA | miR-15b      |
| t0015002 | 23 | 30 AAACTAGCAGCACATAATGGTTT       | miRNA | miR-15a      |
| t0015037 | 21 | 30 ACTAGACTGAAGCTCCTTGAG         | miRNA | miR-151-3p   |
| t0014864 | 23 | 30 GGATATCATCATATACTGTAAGA       | miRNA | miR-144*     |
| t0014617 | 21 | 30 AGTGTTCCTACTTTATGGAA          | miRNA | miR-142*     |
| t0014724 | 23 | 30 TACCGCAGGGTAGAACCACGGAC       | miRNA | miR-140      |
| t0014727 | 24 | 30 CTACCACAGGGTAGAACCACGGAC      | miRNA | miR-140      |
| t0014846 | 22 | 30 ACCACAGGGTAGAATTACGGAA        | miRNA | miR-140      |
| t0015082 | 26 | 30 TACCACAGGGTAGAACCACGGAAGAA    | miRNA | miR-140      |
| t0014928 | 22 | 30 ACCACAGCGTAGAACCACGGAA        | miRNA | miR-140      |
| t0014729 | 21 | 30 TTCGAGGCTACAGTGAGATGT         | miRNA | miR-1304     |
| t0014751 | 20 | 30 TCTGGGCAACAAAGTGAGAC          | miRNA | miR-1285     |
| t0014905 | 22 | 30 AGGATGAGCAAAGAAAGTAGAT        | miRNA | miR-1255a    |
| t0014939 | 22 | 30 TAAAGTGCTGACAGTGTAGATA        | miRNA | miR-106b     |
| t0014745 | 23 | 30 AGCAGCATTGCACAGGGCTATGA       | miRNA | miR-103a     |
| t0014628 | 22 | 30 AGCAGGATTGTACAGGGCTATG        | miRNA | miR-103a     |
| t0014731 | 20 | 30 AAGCAGCATTGTACAGGGCA          | miRNA | miR-103a     |
| t0014708 | 20 | 30 GCAGCATTGTACAGGGCTAT          | miRNA | miR-103a     |



|          |    |                                   |       |            |
|----------|----|-----------------------------------|-------|------------|
| t0014710 | 19 | 30 TACAGTACTGTGATAACTA            | miRNA | miR-101    |
| t0014781 | 21 | 30 TACGGTACTGTGATAACTGAA          | miRNA | miR-101    |
| t0014785 | 21 | 30 TACAGTAATGTGATAACTGAA          | miRNA | miR-101    |
| t0014811 | 26 | 30 TACAGTACTGTGATAACTGAATCCAC     | miRNA | miR-101    |
| t0015049 | 21 | 30 TGAGGTAGTAGTTTGTGCTGC          | miRNA | let-7i     |
| t0015044 | 22 | 30 TGAGGTAGAAAGTTTGTACAGTT        | miRNA | let-7g     |
| t0014882 | 21 | 30 TGAGGTAGTAGATTGTATCTT          | miRNA | let-7f-5p  |
| t0014954 | 19 | 30 TGAGGTAGCAGATTGTATA            | miRNA | let-7f     |
| t0014879 | 22 | 30 TGAGGTAGTAGATCGTATAGTA         | miRNA | let-7f     |
| t0014635 | 21 | 30 AGAGGTAGTAGGTTGAATAGT          | miRNA | let-7d     |
| t0014706 | 22 | 30 AGAGGTAGTGGGTTGCATAGTT         | miRNA | let-7d     |
| t0014935 | 20 | 30 AGAGGAAGTAGGTTGCATAG           | miRNA | let-7d     |
| t0015022 | 25 | 30 TGAGGTAGTAGGTTGTATGGCTATC      | miRNA | let-7c     |
| t0014768 | 22 | 30 TGAGGTAGTAGGGTGTGTGGGT         | miRNA | let-7b     |
| t0014986 | 20 | 30 TGAGTTAGTAGGTTGTGTGG           | miRNA | let-7b     |
| t0014996 | 20 | 30 TGAGGTAGTAGGTTGTGTTG           | miRNA | let-7b     |
| t0015014 | 23 | 30 TGAGGTAGTAGGTTGTATAGATC        | miRNA | let-7      |
| t0014807 | 23 | 29 AGGGACGGGACGCGGTGCAGTAG        | miRNA | miR-92b*   |
| t0014716 | 21 | 29 TATTCCACTTGTCCCGCCTG           | miRNA | miR-92a    |
| t0014804 | 23 | 29 TATTGCACTCGTCCCGGCCATTT        | miRNA | miR-92     |
| t0014773 | 21 | 29 GGGCAGGTGGTGTAGTGGTAT          | miRNA | miR-885    |
| t0014827 | 26 | 29 GTAGAGGAGATGGCGCAGGGGACTTT     | miRNA | miR-877    |
| t0014855 | 26 | 29 AAGTTGGATTGTGACTGCCACATTTT     | miRNA | miR-753c   |
| t0014867 | 22 | 29 TGAAAGACAAGGGTAGTGAGAT         | miRNA | miR-71     |
| t0015043 | 22 | 29 CCTCCACACCCAAGGCTTGCT          | miRNA | miR-532-3p |
| t0015039 | 28 | 29 TCCTGTACTGAGCTGCCCGAGCGGCAT    | miRNA | miR-486-5p |
| t0014682 | 22 | 29 TTCTGTACTGAGCTGCCTCGAG         | miRNA | miR-486-5p |
| t0014829 | 26 | 29 TCCTGTACTGAGCTGCCCGAGGACG      | miRNA | miR-486-5p |
| t0015065 | 29 | 29 AAGGGCTGGGTGCGGTGCGGGCTGGGGCGC | miRNA | miR-4651   |
| t0014898 | 21 | 29 TCGACTCTGGATAGCTGGGCT          | miRNA | miR-4538   |
| t0015524 | 22 | 29 AGAAGGGTCGGGGCGGCAGGGG         | miRNA | miR-4516   |
| t0015419 | 25 | 29 AGTTACCATTACTGAGTTTAAACCA      | miRNA | miR-451    |
| t0015162 | 27 | 29 AAACCGTTACCATTACTGAGTTCGTTCG   | miRNA | miR-451    |
| t0015310 | 21 | 29 AAACCGGTACCATTACTGAGT          | miRNA | miR-451    |
| t0015384 | 23 | 29 AAACCTTACCATTACTGAGTTTA        | miRNA | miR-451    |
| t0015333 | 20 | 29 ACCCACTCCTGGTACCAA             | miRNA | miR-4286   |
| t0015111 | 24 | 29 TGAGGGGCAGAGAGCGAGACTAAA       | miRNA | miR-423-5p |
| t0015315 | 22 | 29 TGAGCGGCAGAGAGCGAGACTT         | miRNA | miR-423-5p |
| t0015159 | 25 | 29 GAAGTTCCTTCGTGGTGGATTCTATC     | miRNA | miR-382    |
| t0015196 | 22 | 29 ACTGGACTGGGAGTCAGAAGGA         | miRNA | miR-378c   |
| t0015372 | 23 | 29 ACTGGACTTGGAGTCAGAAGGTA        | miRNA | miR-378    |
| t0015330 | 23 | 29 GAGGACTGAAGTGGGGAAAGGTT        | miRNA | miR-3526   |
| t0015405 | 24 | 29 TGAAGACTGAAGTGGAGAAGGGTA       | miRNA | miR-3526   |
| t0015563 | 25 | 29 ACTTTGAAGACTGAAGTGGAGAAGG      | miRNA | miR-3526   |
| t0015195 | 21 | 29 TGAGTAGTAGGTTGTATAGTT          | miRNA | miR-352    |
| t0015597 | 20 | 29 CAAGTGAATCCAGGACGCG            | miRNA | miR-3503   |
| t0015607 | 19 | 29 TTATAAAGCAATGAGACTG            | miRNA | miR-340-5p |
| t0015614 | 21 | 29 AAAGCACACGGCCTGCAGAGT          | miRNA | miR-330-3p |
| t0015151 | 22 | 29 AAAAGCTGGGTTGAGAGGGGGT         | miRNA | miR-320d   |
| t0015352 | 22 | 29 GAAAAGTTGGGTTGAGAGGGCT         | miRNA | miR-320d   |
| t0015394 | 25 | 29 AAAAGCTGGGTTGAGAGGGCGAAAA      | miRNA | miR-320a   |
| t0015576 | 22 | 29 AAAGGCTGGGTTGAGAGGGCGA         | miRNA | miR-320a   |
| t0015185 | 22 | 29 ACAAGCTGGGTTGAGAGGGCGA         | miRNA | miR-320a   |
| t0015550 | 23 | 29 GGCTGGTCCGAGTGCAGTGGTGA        | miRNA | miR-3135b  |
| t0015379 | 26 | 29 TGTAACATTCTTGACTTGAAGCATC      | miRNA | miR-30e-5p |
| t0015444 | 26 | 29 CGCGGGTCCGGGGGCGGGGCGGACTG     | miRNA | miR-2981   |
| t0015611 | 21 | 29 AGGGCCCCCCTCAATCCTGT           | miRNA | miR-296-5p |
| t0015280 | 20 | 29 GAGGGTTGGGTGGAGGCTAA           | miRNA | miR-296-3p |

|          |    |                                 |       |              |
|----------|----|---------------------------------|-------|--------------|
| t0015620 | 21 | 29 TCGGGGGGCGGGGCGGACTGT        | miRNA | miR-2885     |
| t0015308 | 23 | 29 CTTCAAGTAATCCAGGATAGGCA      | miRNA | miR-26a      |
| t0015146 | 23 | 29 TTCAAGTAATCCAGGATAGGCAT      | miRNA | miR-26a      |
| t0015192 | 23 | 29 CTTCAAGTAATCCAGGATAGGCT      | miRNA | miR-26a      |
| t0015459 | 21 | 29 TTCAAGTAATCCAGGATAGGA        | miRNA | miR-26a      |
| t0015140 | 20 | 29 CATTGCATTTGTCTCGGTCT         | miRNA | miR-25       |
| t0015244 | 25 | 29 GACTGGGGCGGTACATCTGTTAAAG    | miRNA | miR-219-2-3p |
| t0015406 | 21 | 29 CTGACCTATGAATTGACCGCC        | miRNA | miR-192      |
| t0015596 | 19 | 29 CTGACCTATGAATTGACAG          | miRNA | miR-192      |
| t0015275 | 23 | 29 TGACCTATGAATTGACAGCCAAT      | miRNA | miR-192      |
| t0015489 | 23 | 29 TGGAGAGAAAGGCAGTTCTTGAT      | miRNA | miR-185      |
| t0015402 | 21 | 29 TGGCGAGAAAGGCAGTTCCTG        | miRNA | miR-185      |
| t0015622 | 19 | 29 TGGAGAGAAAGGCAGTTCG          | miRNA | miR-185      |
| t0015412 | 20 | 29 AAGGTAGATAGAACAGTTTT         | miRNA | miR-1839     |
| t0015442 | 19 | 29 AACATTCATTGTTGTGCGT          | miRNA | miR-181d-5p  |
| t0015485 | 24 | 29 TAGCAGCACATCATGGTTTAAAGT     | miRNA | miR-15b      |
| t0015510 | 19 | 29 TATCAGCACATCATGGTTT          | miRNA | miR-15b      |
| t0015557 | 20 | 29 TAACAGCACATCATGGTTTA         | miRNA | miR-15b      |
| t0015449 | 25 | 29 TCAGTGCACACTACAGAACTTTGAGTG  | miRNA | miR-148a     |
| t0015593 | 21 | 29 CTACAGTATAGATGATGTATT        | miRNA | miR-144      |
| t0015361 | 23 | 29 TACAGTATAGATGATGTACTAAA      | miRNA | miR-144      |
| t0015447 | 20 | 29 TCCATAAAGTAGAAAGCACT         | miRNA | miR-142-5p   |
| t0015548 | 24 | 29 TACCACAGGGTAGAACCACGGAGT     | miRNA | miR-140      |
| t0015095 | 22 | 29 ACCACAGGGTAGAACCCCGGAA       | miRNA | miR-140      |
| t0015456 | 23 | 29 ACCACAGGGTAGAACCACGGCCG      | miRNA | miR-140      |
| t0015590 | 19 | 29 TACAGGGTAGAACCACGGA          | miRNA | miR-140      |
| t0015205 | 22 | 29 ACCACAGGGTAGAACCCCGGAT       | miRNA | miR-140      |
| t0015091 | 26 | 29 ACCACAGGGTAGAACCACGGACGGTG   | miRNA | miR-140      |
| t0015337 | 22 | 29 ACCACAGGGTAGAAACACGGAT       | miRNA | miR-140      |
| t0015425 | 21 | 29 ATAAAGTGCTGACAGTGCAGA        | miRNA | miR-106b     |
| t0015619 | 21 | 29 TAAAGTTCTGACAGTGCAGAT        | miRNA | miR-106b     |
| t0015279 | 22 | 29 AAAGTGCTTACAGTGCAGGTAA       | miRNA | miR-106      |
| t0015475 | 22 | 29 ACCAGCATTGTACAGGGCTATG       | miRNA | miR-103a     |
| t0015572 | 19 | 29 AGCAGCATTGTATAGGGCT          | miRNA | miR-103a     |
| t0015303 | 24 | 29 TACAGTACTGTGATAACTGACGGT     | miRNA | miR-101c     |
| t0015222 | 22 | 29 TGAGGTAGTAGATTGAATAGTC       | miRNA | let-7k       |
| t0015294 | 22 | 29 TGAGTTAGTAGTTTGTGCTGTA       | miRNA | let-7i       |
| t0015312 | 21 | 29 TGATGTAGTAGTTTGTACAGT        | miRNA | let-7g       |
| t0015356 | 19 | 29 GAGGTAGTAGATTGTAGTT          | miRNA | let-7f-5p    |
| t0015467 | 21 | 29 TGAGGTAGTAGATTTTCATAGT       | miRNA | let-7f       |
| t0015495 | 28 | 29 TGAGGTAGTAGATTGTATAGTTGGTAGT | miRNA | let-7f       |
| t0015615 | 22 | 29 ACAGGTAGTAGTTGCATAGTT        | miRNA | let-7d       |
| t0015229 | 22 | 29 AGAGGTAGCAGTTGCATAGTT        | miRNA | let-7d       |
| t0015520 | 23 | 29 TGAGGTAGTAGTTGTGTAGTTT       | miRNA | let-7b       |
| t0015571 | 23 | 29 TGAGGTAGTAGTTGTGTGAATC       | miRNA | let-7b       |
| t0015289 | 23 | 29 TGAGGTAGTAGTTGTATAGGGA       | miRNA | let-7-5p     |
| t0015525 | 20 | 29 TGAGGTAGTAGTTGTTTAG          | miRNA | let-7        |
| t0015254 | 26 | 29 TGAGGTAGGAGTTGTATAGTTGATC    | miRNA | let-7        |
| t0015163 | 21 | 29 TGAGGTAGTAAGTTGTATAGT        | miRNA | let-7        |
| t0015600 | 24 | 29 TGAGGTAGTAGTTGTATAGTTTT      | miRNA | let-7        |
| t0015621 | 23 | 28 AGGACTGACGTGGAGAAGGGTTC      | miRNA | miR-739      |
| t0015598 | 19 | 28 GAAGACTGAAGTGGAGAAG          | miRNA | miR-739      |
| t0015296 | 22 | 28 AAGTCATTGGAGGGTTTGAGCA       | miRNA | miR-616      |
| t0015561 | 23 | 28 ACCTCCCACACCCAAGGCTTGCA      | miRNA | miR-532-3p   |
| t0015131 | 19 | 28 TAGCAGCGGGAACAGTTCA          | miRNA | miR-503      |
| t0015588 | 25 | 28 TCCTGTAAGTACTGAGCTGCCCGAGTAG | miRNA | miR-486-5p   |
| t0015154 | 24 | 28 TCCTGTAAGTACTGAGCTGCCCGAGAG  | miRNA | miR-486-5p   |
| t0015396 | 21 | 28 TACTGTAAGTACTGAGCTGCCCGA     | miRNA | miR-486-5p   |

|          |    |              |                         |       |             |
|----------|----|--------------|-------------------------|-------|-------------|
| t0015257 | 21 | 28 ATCCTGTA  | GAGCTGCCTCG             | miRNA | miR-486-5p  |
| t0015256 | 28 | 28 TCCTGTA   | GAGCTGCCCCGAGAATATC     | miRNA | miR-486-5p  |
| t0015335 | 22 | 28 TCCTGTAC  | GAGCTGCCCCGAG           | miRNA | miR-486-5p  |
| t0015390 | 22 | 28 TCCTGTGCT | GAGCTGCCCCGAG           | miRNA | miR-486-5p  |
| t0015558 | 25 | 28 TCCTGTA   | GAGCTGCCCCGAGAGT        | miRNA | miR-486-5p  |
| t0015953 | 23 | 28 TCCTGTA   | GAGCTGCACCGAGA          | miRNA | miR-486-5p  |
| t0016134 | 23 | 28 CGGGGCAG  | CTCAGTACAGGATGA         | miRNA | miR-486-3p  |
| t0015944 | 22 | 28 GTAGAATT  | GTGTCGGCAGATCT          | miRNA | miR-4860    |
| t0015656 | 22 | 28 TAGGATT   | GTGTCGGCAGATCTT         | miRNA | miR-4860    |
| t0015850 | 20 | 28 TGTAGAG   | CAGGGAGCAGGAG           | miRNA | miR-4732-5p |
| t0015730 | 21 | 28 GGGGGG    | GAGAAGGGTCGGGGCG        | miRNA | miR-4516    |
| t0015816 | 19 | 28 GGGGAG    | GAGAAGGGTCGGGG          | miRNA | miR-4516    |
| t0015902 | 21 | 28 AAACCGT   | TACCATTCTGAGT           | miRNA | miR-451     |
| t0015989 | 23 | 28 AAACCGT   | TACAATTACTGAGTTT        | miRNA | miR-451     |
| t0016012 | 20 | 28 CAGCAG    | CAATTCATTTTTTG          | miRNA | miR-424     |
| t0016117 | 19 | 28 TGAGGC    | CAGAGAGCGAGACT          | miRNA | miR-423-5p  |
| t0016118 | 20 | 28 TGAGGG    | CAGAGAGCGATAC           | miRNA | miR-423-5p  |
| t0016139 | 23 | 28 TGAGGG    | CAGAGAGCGAGTCTTT        | miRNA | miR-423-5p  |
| t0016177 | 23 | 28 TGAGGG    | TCAAGAGCGAGACTTA        | miRNA | miR-423-5p  |
| t0015678 | 21 | 28 TGGGGC    | CAGAGAGCGAGACTTT        | miRNA | miR-423-5p  |
| t0015824 | 23 | 28 TGAGGG    | CAGAGAGCTAGACTTA        | miRNA | miR-423-5p  |
| t0016072 | 21 | 28 ATCAAC    | AGACATTAATTGGGC         | miRNA | miR-421     |
| t0015710 | 19 | 28 TGTAGT    | AGTTTGTACAGTT           | miRNA | miR-3962    |
| t0015897 | 22 | 28 AATTGC    | ACGGTATTTATCTGTA        | miRNA | miR-363     |
| t0016145 | 23 | 28 AGGACT    | GAAAGTGGGAAAGGTTT       | miRNA | miR-3526    |
| t0015775 | 23 | 28 TCTCAC    | ACAGAAATCGCACTCGT       | miRNA | miR-342-3p  |
| t0015855 | 20 | 28 GCCCTG    | GGCCTATCCTAGA           | miRNA | miR-331     |
| t0015653 | 22 | 28 AAAGCT    | GGGTTGAGAGGGCATT        | miRNA | miR-320d    |
| t0015625 | 22 | 28 AAAAGC    | TGGGATGAGAGGGCGA        | miRNA | miR-320a    |
| t0015756 | 27 | 28 AAAAGC    | TGGGTTGAGAGGGCGAATTTT   | miRNA | miR-320a    |
| t0015835 | 22 | 28 GTGGA     | AAGTAGACGGCCAGAGA       | miRNA | miR-3190    |
| t0015869 | 21 | 28 TATAAA    | ATGAGGGCAGTAAGA         | miRNA | miR-3163    |
| t0015965 | 22 | 28 TATAAA    | ATGAGGGCAGTAAGAC        | miRNA | miR-3163    |
| t0016151 | 23 | 28 TATAAA    | ATGGGGTAGTAAGACG        | miRNA | miR-3163    |
| t0015957 | 23 | 28 TATAAA    | ATGAGGGCAGTAAGACA       | miRNA | miR-3163    |
| t0015901 | 20 | 28 TGGGAC    | AAGAGGACGGTCTT          | miRNA | miR-3122    |
| t0016121 | 29 | 28 CGCGCG    | GGTCCGGGGGGCGGGGCGGACT  | miRNA | miR-2981    |
| t0016169 | 21 | 28 ACAAGT    | AATCCAGGATAGGTT         | miRNA | miR-26a     |
| t0015672 | 21 | 28 AGGCGG    | AGACTTGGGCAATAA         | miRNA | miR-25*     |
| t0015974 | 21 | 28 CATTGC    | ACTTGTCTCGCTCTG         | miRNA | miR-25      |
| t0015684 | 21 | 28 ATCAC     | ATTGCCAGGGATTTG         | miRNA | miR-23a     |
| t0015727 | 22 | 28 AAGCTG    | TCAAGTGAAGAACTGT        | miRNA | miR-22-3p   |
| t0016062 | 23 | 28 CTGTGC    | GTGACAGCGGCTGAT         | miRNA | miR-210     |
| t0015963 | 24 | 28 CAACGG    | AATCCCAAAAGCAGCTAT      | miRNA | miR-191     |
| t0015734 | 28 | 28 CAACGG    | AATCCCAAAAGCAGCTGTTCGGC | miRNA | miR-191     |
| t0015843 | 23 | 28 TGGAG     | AGAAAGGCAGTTCCCGAA      | miRNA | miR-185     |
| t0015911 | 20 | 28 TGGAG     | GGAAAGGCAGTTCCT         | miRNA | miR-185     |
| t0016059 | 23 | 28 TGGAG     | AGAAAGGCAGTTCCTGAT      | miRNA | miR-185     |
| t0016095 | 21 | 28 TGGAG     | AGAAAGGCAGTTGCTG        | miRNA | miR-185     |
| t0015640 | 22 | 28 AACATT    | CAACTCTGTCGGTGAG        | miRNA | miR-181a    |
| t0016175 | 19 | 28 TAGTAC    | GTAATATTGGCG            | miRNA | miR-16c     |
| t0016098 | 22 | 28 GAGCAG    | CACGTAATATTGGCG         | miRNA | miR-16      |
| t0015788 | 24 | 28 GTAGC     | AGCACGTAATATTGGCGT      | miRNA | miR-16      |
| t0016005 | 19 | 28 TAGCAG    | CATATAATGGTTT           | miRNA | miR-15a     |
| t0016164 | 21 | 28 CTAGAC    | TGAAGCTCCTTGAGG         | miRNA | miR-151-3p  |
| t0016100 | 20 | 28 CTAGAC    | TGAAGCTCCTTGAG          | miRNA | miR-151-3p  |
| t0016080 | 22 | 28 TCAGT     | GCAATACAGAACTTTGA       | miRNA | miR-148     |
| t0016143 | 19 | 28 TACAGT    | ATAGATGATGTAG           | miRNA | miR-144     |

|          |    |                                     |       |             |
|----------|----|-------------------------------------|-------|-------------|
| t0015882 | 23 | 28 TACAGTATAGATGATGTACTATT          | miRNA | miR-144     |
| t0016019 | 20 | 28 ATACAGTATAGATGATGTAA             | miRNA | miR-144     |
| t0016101 | 21 | 28 ACCACAGGGTAGCACCACGGA            | miRNA | miR-140     |
| t0016132 | 21 | 28 ACCACCGGGTAGAACCACGGA            | miRNA | miR-140     |
| t0015717 | 20 | 28 ACCACAGGGTAGAACGACGG             | miRNA | miR-140     |
| t0015747 | 23 | 28 TACCACTGGGTAGAACCACGGAT          | miRNA | miR-140     |
| t0015701 | 21 | 28 ACCACAGGGTAGAACTACGGT            | miRNA | miR-140     |
| t0015706 | 23 | 28 TACCACAGGGTGGAAACCACGGAA         | miRNA | miR-140     |
| t0016085 | 23 | 28 TACCACAGGGTAGAAATACGGAA          | miRNA | miR-140     |
| t0016018 | 23 | 28 TACCACAGGGCAGAACCACGGAA          | miRNA | miR-140     |
| t0016077 | 23 | 28 TACCACAGGGTAGAACCCCGGAG          | miRNA | miR-140     |
| t0016188 | 25 | 28 CTCGGCGTGGCGTCGGTTCGTGTAGA       | miRNA | miR-1307    |
| t0015627 | 22 | 28 TTCGAGGCTACAGTGAGATGTG           | miRNA | miR-1304    |
| t0015904 | 21 | 28 CGTGCCACCCTTTTCCCCAGT            | miRNA | miR-1227    |
| t0015958 | 23 | 28 AAGCAGCATTGTACAGGGCTATA          | miRNA | miR-107     |
| t0015691 | 22 | 28 ATAAAGTGCTGACAGTGCAGAT           | miRNA | miR-106b    |
| t0015721 | 23 | 28 TAAAGTGCTGACAGTGCAGATAT          | miRNA | miR-106b    |
| t0015754 | 22 | 28 AGCAGCATTGTACGGGGCTATG           | miRNA | miR-103a    |
| t0015804 | 20 | 28 TACAGTACAGTGATAACTGA             | miRNA | miR-101     |
| t0015916 | 22 | 28 GTACAGTACTGTGACAACCTGAA          | miRNA | miR-101     |
| t0015962 | 23 | 28 TGAGGTAGTAGTTTGTGCTTTTT          | miRNA | let-7i      |
| t0016035 | 21 | 28 TGAGGAAGTAGTTTGTACAGT            | miRNA | let-7g      |
| t0016039 | 21 | 28 TGAGGTAGTAGTTTGTAAAGT            | miRNA | let-7g      |
| t0016091 | 21 | 28 TGAGGTAGTATTTTGTACAGT            | miRNA | let-7g      |
| t0015810 | 24 | 28 TGAGGTAGTAGATTGTATAGCAGA         | miRNA | let-7f-5p   |
| t0015817 | 20 | 28 TGAGGTAGTAGATTGTAAGT             | miRNA | let-7f-5p   |
| t0015941 | 22 | 28 TGAGGTAGTAGATTGTATATTA           | miRNA | let-7f-5p   |
| t0015759 | 24 | 28 TGAGGTAGTAGATTGTATAGTGT          | miRNA | let-7f      |
| t0015803 | 24 | 28 AGTGAGGTAGTAGATTGTATAGTT         | miRNA | let-7f      |
| t0016138 | 21 | 28 TGAGGTAGTAGATTGTGTA              | miRNA | let-7f      |
| t0016154 | 19 | 28 TGGTAGTAGATTGTATAGT              | miRNA | let-7f      |
| t0015976 | 21 | 28 TGAGGTAGTAGATAGTATAGT            | miRNA | let-7f      |
| t0016078 | 27 | 28 TGAGGTAGTAGGTTGTGTGGTTAAAAA      | miRNA | let-7b      |
| t0015750 | 23 | 28 TGAGGTAGTAGGTTGTATAGTAT          | miRNA | let-7-5p    |
| t0015793 | 20 | 28 GTGAGGTAGTAGGTTGTATA             | miRNA | let-7       |
| t0016022 | 21 | 28 GGTAGTAGGTTGTATAGTTGA            | miRNA | let-7       |
| t0016174 | 26 | 28 TGAGGTAGTAGGTTGTATAGTTAAAC       | miRNA | let-7       |
| t0015927 | 20 | 28 TGAGGTAGGAGGTTGTATAG             | miRNA | let-7       |
| t0016008 | 19 | 27 GTGGAAGGTTGTAGGCATG              | miRNA | miR-965-5p  |
| t0016142 | 21 | 27 TCTTCTCTGTTTTGGCCATGT            | miRNA | miR-942     |
| t0015626 | 21 | 27 TATTGCACTCGTCCCGGCATA            | miRNA | miR-92      |
| t0015688 | 25 | 27 TACGTCATCGTTGTCATCGTCAATT        | miRNA | miR-598     |
| t0015694 | 22 | 27 AAAAAGTACTGAGACTACTTTTGCA        | miRNA | miR-548e    |
| t0015695 | 20 | 27 AAAACCCGCAATTACTTTTG             | miRNA | miR-548ac   |
| t0015930 | 24 | 27 TCCTGTAAGTACTGAGCTGCCCGACGT      | miRNA | miR-486-5p  |
| t0015732 | 21 | 27 TCCTGTAAGTACTGAGCTGCCCGA         | miRNA | miR-486-5p  |
| t0016000 | 23 | 27 TCCTGTAAGTACTGAGCTGCCCGAGA       | miRNA | miR-486-5p  |
| t0015680 | 29 | 27 TCCTGTAAGTACTGAGCTGCCCGAGTCGGCAT | miRNA | miR-486-5p  |
| t0015762 | 21 | 27 TCTCGTACTGAGCTGCCCGA             | miRNA | miR-486-5p  |
| t0015830 | 20 | 27 TCTCCCTCCTGTTCTGGCT              | miRNA | miR-4685-3p |
| t0016054 | 22 | 27 AAGGGCTGTGTCGGTCCGGGCTA          | miRNA | miR-4651    |
| t0016235 | 20 | 27 GGCTGGGTCGGTCCGGGCTGG            | miRNA | miR-4651    |
| t0016560 | 21 | 27 AGAAGGGTCCGGGCGGCAGGT            | miRNA | miR-4516    |
| t0016214 | 20 | 27 AAACCGTTACAATTACTGAG             | miRNA | miR-451     |
| t0016224 | 22 | 27 AAACCGTTACGATTACTGAGTT           | miRNA | miR-451     |
| t0016343 | 22 | 27 AAGCCGTTACCATTACTGAGTT           | miRNA | miR-451     |
| t0016503 | 29 | 27 AAACCGTTACCATTACTGAGTTGGGGTAG    | miRNA | miR-451     |
| t0016393 | 21 | 27 AAACCGTTACCATTACTGAGT            | miRNA | miR-451     |

|          |    |                                   |       |             |
|----------|----|-----------------------------------|-------|-------------|
| t0016555 | 21 | 27 AATCGTTACCATTACTGAGTT          | miRNA | miR-451     |
| t0016643 | 21 | 27 AAACCGTTAGCATTACTGAGT          | miRNA | miR-451     |
| t0016649 | 25 | 27 CGAAACCGTTACCATTACTGAGTTT      | miRNA | miR-451     |
| t0016778 | 22 | 27 TGAGGGGCAGCGAGCGAGACTT         | miRNA | miR-423-5p  |
| t0016776 | 19 | 27 TGATGGGCAGAGAGCGAGA            | miRNA | miR-423-5p  |
| t0016445 | 21 | 27 TGAGGGGCAGAGAGCGAGCTT          | miRNA | miR-423-5p  |
| t0016487 | 23 | 27 TGAGGTGCAGAGAGCGAGACTTA        | miRNA | miR-423-5p  |
| t0016704 | 24 | 27 TGAGTGGCAGAGAGCGAGACTTTA       | miRNA | miR-423-5p  |
| t0016221 | 22 | 27 ACTGGACTTGGAGTTAGAAGGC         | miRNA | miR-378     |
| t0016310 | 22 | 27 TGAGGATGGATAGCAAGGAAGT         | miRNA | miR-3605-5p |
| t0016480 | 24 | 27 TGAAGACTGAAGTGGAGAAGGTTT       | miRNA | miR-3526    |
| t0016556 | 25 | 27 TCTCACACAGAAATCGCACCCGTAT      | miRNA | miR-342-3p  |
| t0016667 | 25 | 27 AAAAGCTGGGTTGAGAGGGCGGATT      | miRNA | miR-320d    |
| t0016672 | 23 | 27 AAAACCTGGGTTGAGAGGGCGTT        | miRNA | miR-320d    |
| t0016674 | 21 | 27 AAAATTGGGTTGAGAGGGCGT          | miRNA | miR-320d    |
| t0016727 | 22 | 27 AAAAGCTGGGTTAAGAGGGCGA         | miRNA | miR-320a    |
| t0016314 | 32 | 27 TGTA AACATCCTACACTCAGCTAGACATG | miRNA | miR-30b     |
| t0016633 | 19 | 27 TAGCATTGAAATCGGTTA             | miRNA | miR-29c     |
| t0016650 | 20 | 27 GCGGATGTAGCCAAGGGGA            | miRNA | miR-270     |
| t0016760 | 22 | 27 TTCAAGTAATTCAGGATAGGTG         | miRNA | miR-26b     |
| t0016789 | 22 | 27 TTCAAGTAATTCAGGATAGGCA         | miRNA | miR-26b     |
| t0016604 | 22 | 27 AGCGGAGACTTGGCAATTGT           | miRNA | miR-25*     |
| t0016219 | 22 | 27 CATTGCACTTGTCTAGGTCTGA         | miRNA | miR-25      |
| t0016500 | 24 | 27 TGGCTCAGTTCAGCAGGAACAGTA       | miRNA | miR-24      |
| t0016692 | 24 | 27 ATCACATTGCCAGGGATTACCACT       | miRNA | miR-23b     |
| t0016318 | 21 | 27 ATCACATTGCCAGGGATTACC          | miRNA | miR-23b     |
| t0016747 | 21 | 27 AAGCTGCCAGTTGAAGAATTG          | miRNA | miR-22-3p   |
| t0016793 | 22 | 27 AGCTACATCTGGCTACTGGGAA         | miRNA | miR-222     |
| t0016458 | 22 | 27 AGTTCTTCAGTGGCAAGCTTTA         | miRNA | miR-22*     |
| t0016352 | 20 | 27 TGAGGTAGGTAGGTTGTATA           | miRNA | miR-1961    |
| t0016416 | 21 | 27 TTGACCTATGAATTGACAGCC          | miRNA | miR-192     |
| t0016631 | 24 | 27 CTGACCTATGAATTGACAGCCAGA       | miRNA | miR-192     |
| t0016456 | 19 | 27 CAACGGAATCCAAAAGCA             | miRNA | miR-191     |
| t0016546 | 21 | 27 AACGGAATCCCAAGAGCAGCT          | miRNA | miR-191     |
| t0016684 | 22 | 27 TGGAGAGAAAGGCAGTTCCTAG         | miRNA | miR-185     |
| t0016197 | 21 | 27 TGGAGAGAGAGGCAGTTCCTG          | miRNA | miR-185     |
| t0016262 | 22 | 27 GGAGAGAAAGGCAGTTCCTGAA         | miRNA | miR-185     |
| t0016258 | 22 | 27 TGGAGAGAAAGGCAGTTCGGA          | miRNA | miR-185     |
| t0016469 | 25 | 27 TCGACGGAGA ACTTATAAGGGCATC     | miRNA | miR-184-3p  |
| t0016428 | 22 | 27 TGAGGGAGTAGATTGTGTAGTT         | miRNA | miR-1827    |
| t0016266 | 26 | 27 TTTGGCAATGGTAGAACTCACACAAG     | miRNA | miR-182     |
| t0016659 | 20 | 27 TAGCAGCACGTA ACTATTGG          | miRNA | miR-16      |
| t0016305 | 19 | 27 TAGCAGCACGTA AATAGCG           | miRNA | miR-16      |
| t0016281 | 20 | 27 TAGCAGCACTTAAATATTGG           | miRNA | miR-16      |
| t0016712 | 20 | 27 TAGCAGCACCTCATGGTTTA           | miRNA | miR-15b     |
| t0016225 | 18 | 27 TAGCAGCACATCATGTTA             | miRNA | miR-15b     |
| t0016272 | 18 | 27 TAGCAGCATATCATGGTA             | miRNA | miR-15b     |
| t0016436 | 19 | 27 TAGCAGCACATCATGTTTT            | miRNA | miR-15b     |
| t0016441 | 22 | 27 TAGCAGTACATAATGGTTTTGTG        | miRNA | miR-15a     |
| t0016517 | 20 | 27 TAGAAGCACATAATGGTTTTG          | miRNA | miR-15a     |
| t0016714 | 24 | 27 TCAGTGTATGACAGAACCTGGATC       | miRNA | miR-152     |
| t0016511 | 24 | 27 TACCACATGGTAGAACACGGAAA        | miRNA | miR-140     |
| t0016439 | 22 | 27 ACAACAGGGTAGAACACGGAA          | miRNA | miR-140     |
| t0016453 | 23 | 27 ACCACAGGGTAGAACACGGTAA         | miRNA | miR-140     |
| t0016202 | 23 | 27 TACAACAGGGTAGAACACGGAA         | miRNA | miR-140     |
| t0016223 | 24 | 27 TACCACAGGGTAGAACACAGACA        | miRNA | miR-140     |
| t0016543 | 23 | 27 ACCATAGGGTAGAACACGGACA         | miRNA | miR-140     |
| t0016434 | 22 | 27 ACCACAGGGTACAACACGGAC          | miRNA | miR-140     |

|          |    |                                  |       |              |
|----------|----|----------------------------------|-------|--------------|
| t0016605 | 22 | 27 TACCACAGGGTAGCACCACGGA        | miRNA | miR-140      |
| t0016613 | 24 | 27 CAGTGCAATGTAAAAGGGCATTT       | miRNA | miR-130a     |
| t0016756 | 21 | 27 TTCTGGAATTTGTGTGAGGGA         | miRNA | miR-1299     |
| t0016621 | 20 | 27 TAAAGTGCTGACAGGGCAGA          | miRNA | miR-106b     |
| t0016772 | 22 | 27 AGCAGCATTGTGCAGGGCTATG        | miRNA | miR-103a     |
| t0016312 | 19 | 27 CAGCATTGTACAGGGCTAT           | miRNA | miR-103a     |
| t0016347 | 23 | 27 TACAGTACTGTGATAACTGAATA       | miRNA | miR-101      |
| t0016463 | 22 | 27 TGAGGTAGTAGTTCGTACAGTT        | miRNA | let-7g       |
| t0016590 | 31 | 27 TGAGGTAGTAGATTGTATAGTACCACTCT | miRNA | let-7f       |
| t0016595 | 23 | 27 TGAGGTAGTAGATTGTATAATTG       | miRNA | let-7f       |
| t0016624 | 25 | 27 TGAGGTAGGAGATTGTATAGTTATC     | miRNA | let-7e       |
| t0016742 | 22 | 27 CTATACGACCTGCTGCCTTTCT        | miRNA | let-7d*      |
| t0016769 | 25 | 27 TGAGGTAGTAGGTTGTGTGGTTGAA     | miRNA | let-7b       |
| t0016797 | 27 | 27 TGAGGTAGTAGGTTGTGTGGTTTGATC   | miRNA | let-7b       |
| t0016552 | 27 | 27 TGAGGTAGTAGGTTGTATGGTTATATC   | miRNA | let-7b       |
| t0016350 | 22 | 27 TGAGGTAGTAGGTTGTAAAGTT        | miRNA | let-7        |
| t0016346 | 20 | 26 AACCCGTAGATCCGATCTTG          | miRNA | miR-99a      |
| t0016277 | 23 | 26 CACCCGGCTGTGTGCACATGTGT       | miRNA | miR-941      |
| t0016617 | 21 | 26 TATTGCACTTGTCTCGGCCTG         | miRNA | miR-92a      |
| t0016279 | 21 | 26 TATTGCACTTGTCCCGGCTTG         | miRNA | miR-92a      |
| t0016411 | 23 | 26 GGAGACTGTGAAGCGGGCACGCC       | miRNA | miR-920      |
| t0016583 | 20 | 26 TATTGCACTCGTTCCGGCCT          | miRNA | miR-92       |
| t0016588 | 22 | 26 TCGGGGCTAGGGCTAATAGCA         | miRNA | miR-744      |
| t0016715 | 25 | 26 AGGGCGCGCGGGTCGGGGCGGCGTT     | miRNA | miR-638      |
| t0016538 | 23 | 26 GACTATAGAACTTTCTCCCTAAA       | miRNA | miR-625*     |
| t0016438 | 22 | 26 GTAATTTTATGTATAAGCTAGT        | miRNA | miR-590-3p   |
| t0016735 | 19 | 26 CAAAAGTGATCGTGGTTTT           | miRNA | miR-548t     |
| t0016787 | 19 | 26 CCCACACCCAAGGCTTGCA           | miRNA | miR-532-3p   |
| t0016407 | 24 | 26 TAGCAGCGGGAACAGTTCTGAAGA      | miRNA | miR-503      |
| t0016866 | 18 | 26 AATCCTTGCTATCTGGGT            | miRNA | miR-500b     |
| t0017242 | 29 | 26 TCCTGTACTGAGCTGCCCCGAGATGAGCC | miRNA | miR-486-5p   |
| t0016850 | 21 | 26 TCTGTACTGAGCTGCCCCGAG         | miRNA | miR-486-5p   |
| t0016885 | 21 | 26 TCCTGTGCTGAGCTGCCCCGA         | miRNA | miR-486-5p   |
| t0017214 | 28 | 26 TCCTGTACTGAGCTGCCCCGAGATGGCT  | miRNA | miR-486-5p   |
| t0017133 | 23 | 26 TCCTGTACTGAGCTACCCCGAGA       | miRNA | miR-486-5p   |
| t0017347 | 24 | 26 TGTAGGATTGTGTCGGCAGATTTT      | miRNA | miR-4860     |
| t0017091 | 22 | 26 TAAATGTAGAATTGTGTCGGTT        | miRNA | miR-4860     |
| t0016953 | 22 | 26 CTGTAGAGCAGGGAGCAGGAAG        | miRNA | miR-4732-5p  |
| t0016819 | 20 | 26 AGCAGGCGAGGCTGGGCTGA          | miRNA | miR-4690-5p  |
| t0017208 | 21 | 26 AGGGCTGGGTCGGTCGGGCTG         | miRNA | miR-4651     |
| t0016925 | 30 | 26 AGGGCTGGGTCGGTCGGGCTGGGGCGCA  | miRNA | miR-4651     |
| t0016988 | 24 | 26 AGAGAAGGGTTCGGGGCGGCAGGGG     | miRNA | miR-4516     |
| t0017180 | 23 | 26 AAACCATTACCATTACTGAGTTT       | miRNA | miR-451      |
| t0016803 | 21 | 26 AAACCCTTACCATTAGTGAGT         | miRNA | miR-451      |
| t0016825 | 26 | 26 GATAAACCGTTACCATTACTGAGTTT    | miRNA | miR-451      |
| t0016877 | 21 | 26 AAACCGTTACCATTTAGAGT          | miRNA | miR-451      |
| t0016945 | 23 | 26 TTCGGGGTCTGGGCGGGCGAGT        | miRNA | miR-4508     |
| t0017125 | 19 | 26 TTTGGAGGAGATGCGGTTA           | miRNA | miR-4443     |
| t0016837 | 23 | 26 TCCCACTGCTTCACTTGACTAGC       | miRNA | miR-4301     |
| t0017352 | 24 | 26 TGAGGGGCAGAGAGTGAGACTTTA      | miRNA | miR-423-5p   |
| t0016820 | 23 | 26 TGTGGGGCAGAGAGCCGAGACTTT      | miRNA | miR-423-5p   |
| t0017108 | 24 | 26 TGAGGGGCAGAGAGCCGAGACTTTT     | miRNA | miR-423-5p   |
| t0017043 | 24 | 26 CTGAGGGGCAGAGAGCTAGACTTT      | miRNA | miR-423-5p   |
| t0017060 | 19 | 26 CAAGGAAAGTACTAGGTTG           | miRNA | miR-4005a-3p |
| t0017307 | 22 | 26 TGTCTCTAGGGCCTGCAGTCG         | miRNA | miR-3909     |
| t0016989 | 25 | 26 ACTGGACTTGGACTCAGAAGGAATC     | miRNA | miR-378c     |
| t0017157 | 23 | 26 CCGGGGGTGGGGTTCGGCGGGGA       | miRNA | miR-3621     |
| t0017253 | 22 | 26 AAAAGCTGGGTTGAGAGGGTAA        | miRNA | miR-320d     |

|          |    |                                |       |             |
|----------|----|--------------------------------|-------|-------------|
| t0017254 | 23 | 26 AAAAGCTGGGTTGGGAGGGCGAA     | miRNA | miR-320a    |
| t0016893 | 22 | 26 AAAAGCTGGGTTGAGAGCGCGA      | miRNA | miR-320a    |
| t0016804 | 26 | 26 GAATCTGAGAAGGCGCACAAAGGTAGA | miRNA | miR-3200-5p |
| t0016839 | 21 | 26 GTGGAAGGTAGACGGCCAGTT       | miRNA | miR-3190    |
| t0016903 | 26 | 26 TGTAACATCCCAGACTGGAAGCATC   | miRNA | miR-30a-5p  |
| t0016981 | 22 | 26 TAGCATTATCTGAAATCGGTTT      | miRNA | miR-29e     |
| t0017109 | 23 | 26 TTCAAGTAATTCAGGATAGGTTT     | miRNA | miR-26b     |
| t0017195 | 22 | 26 CATTGCATTTGTCTCGGTCTGT      | miRNA | miR-25      |
| t0017044 | 24 | 26 TGTCAGTTTGTCAAATACCCCAA     | miRNA | miR-223     |
| t0017281 | 28 | 26 CGGACAACGGAATCCCAAAGCAGCTGT | miRNA | miR-191     |
| t0017237 | 21 | 26 GCCCAAAGGTGAATTTTTTTGG      | miRNA | miR-186*    |
| t0016991 | 25 | 26 TGGAGAGAAAGGCAGTTCCTGATGG   | miRNA | miR-185     |
| t0016902 | 23 | 26 CGGAGAGAAAGGCAGTTCCTGAA     | miRNA | miR-185     |
| t0017112 | 25 | 26 TGGAGAGAAAGGCAGTTCCTGAAAG   | miRNA | miR-185     |
| t0017145 | 24 | 26 TGGACGGAGAAGTATAAGGGCTT     | miRNA | miR-184-3p  |
| t0017359 | 21 | 26 AGACCTACTTATCTACCAATT       | miRNA | miR-1839-3p |
| t0016865 | 20 | 26 TGAATTACCGAAGGGCCATA        | miRNA | miR-183*    |
| t0017105 | 21 | 26 AACATTCATTGCTGTCGGTGG       | miRNA | miR-181b    |
| t0017181 | 20 | 26 TAGCAGCACGCAAATATTGG        | miRNA | miR-16      |
| t0016964 | 19 | 26 TAGCAGTACATCATGGTTA         | miRNA | miR-15b     |
| t0017213 | 19 | 26 AAGCAGCACATCATGGTTA         | miRNA | miR-15b     |
| t0017052 | 25 | 26 TGAGAACTGAATTCATAGGCTATC    | miRNA | miR-146b-5p |
| t0017368 | 24 | 26 TGAGAACTGAATTCATAGGCTGT     | miRNA | miR-146b    |
| t0017364 | 21 | 26 GATATCATCATATACTGTAAG       | miRNA | miR-144*    |
| t0016975 | 18 | 26 TACAGTGTAGATGATGTA          | miRNA | miR-144     |
| t0017046 | 23 | 26 TGAGATGAAGCACCGTAGCTATC     | miRNA | miR-143     |
| t0017144 | 22 | 26 ACCATAGGGTAGAACCACGGAT      | miRNA | miR-140     |
| t0017206 | 25 | 26 TACCACAGGGTAGAACCACGGATAA   | miRNA | miR-140     |
| t0017078 | 22 | 26 ACCACAGGGTTGAACCACGGAA      | miRNA | miR-140     |
| t0016982 | 21 | 26 ACCACAGGGTATAACCACGGA       | miRNA | miR-140     |
| t0017365 | 22 | 26 ACCACAGGGGAGAACCACGGAT      | miRNA | miR-140     |
| t0017027 | 23 | 26 ACCACAGGGTAGAACTACGGAAT     | miRNA | miR-140     |
| t0017134 | 21 | 26 ACTCGGCGTGGCGTCCGTCGT       | miRNA | miR-1307    |
| t0017234 | 20 | 26 TCGGCGTGGCGTCCGTCGTG        | miRNA | miR-1307    |
| t0017166 | 21 | 26 TCTGGGCAACAAAGTGAGACT       | miRNA | miR-1285    |
| t0016915 | 22 | 26 TCACAGTGAACCGGTCTCTTAG      | miRNA | miR-128     |
| t0016968 | 21 | 26 GTGGGGGAGAGGCTGTAATTT       | miRNA | miR-1275    |
| t0016967 | 20 | 26 GTGGGGGAGAGGCTGTATTT        | miRNA | miR-1275    |
| t0017048 | 24 | 26 AAAGCAGCATTGTACAGGGCTATA    | miRNA | miR-107     |
| t0016801 | 23 | 26 TACCCTGTAGATCCGAATTTGTG     | miRNA | miR-10-5p   |
| t0016840 | 23 | 26 AGCAGCATTGTACAGGGCTATGC     | miRNA | miR-103a    |
| t0016974 | 21 | 26 AGCAGCCTTGTACAGGGCTAT       | miRNA | miR-103a    |
| t0017156 | 24 | 26 AGCAGCATTGTACAGGGCTATGAG    | miRNA | miR-103a    |
| t0017219 | 22 | 26 AGCAACATTGTACAGGGCTATG      | miRNA | miR-103a    |
| t0017332 | 21 | 26 AGCAGCATTGTACAGGCCTAT       | miRNA | miR-103a    |
| t0016983 | 19 | 26 ACAGTACTGTGATAACTGA         | miRNA | miR-101c    |
| t0017152 | 22 | 26 TACAGTACTGTGACAACTGAAG      | miRNA | miR-101     |
| t0017269 | 22 | 26 TGAGGCAGTAGTTTGTGCTGTT      | miRNA | let-7i      |
| t0017358 | 26 | 26 TGAGGTAGTAGTTTGTACAGTTCGGC  | miRNA | let-7g      |
| t0017141 | 22 | 26 TCAGGTAGTAGATTGTATAGTA      | miRNA | let-7f      |
| t0017341 | 20 | 26 AGAGGTAGTAGATTGTATAG        | miRNA | let-7f      |
| t0017227 | 24 | 26 TGAGGTAGTAGATTGTATAGTTTT    | miRNA | let-7f      |
| t0017073 | 25 | 26 TGAGGTAGTAGATTGTATAGTTACG   | miRNA | let-7f      |
| t0016836 | 25 | 26 TGAGGTAGTAGATTGTATAGTTAAA   | miRNA | let-7f      |
| t0016862 | 19 | 26 TGAGGTAGTAGACTGTATA         | miRNA | let-7f      |
| t0016934 | 24 | 26 AGAGGTAGTAGTTGCATAGTTTT     | miRNA | let-7d      |
| t0017018 | 22 | 26 TGAGGTAGTAGTTGTGCGGTA       | miRNA | let-7b      |
| t0017158 | 23 | 26 AATGAGGTAGTAGTTGTGTGGT      | miRNA | let-7b      |

|          |    |                                  |       |              |
|----------|----|----------------------------------|-------|--------------|
| t0017015 | 26 | 26 TGAGGTAGTAGGTTGTATAGTGAAA     | miRNA | let-7-5p     |
| t0016888 | 22 | 26 TGAGGTAGTAGGTGGTATAGTT        | miRNA | let-7        |
| t0017007 | 20 | 26 TGGTAGTAGGTTGTATAGTT          | miRNA | let-7        |
| t0017055 | 25 | 26 TGAGGTAGTATGTTGTATAGTTATC     | miRNA | let-7        |
| t0016847 | 24 | 25 GTGGGCCTGACGTGGAGCTGGATC      | miRNA | miR-770-3p   |
| t0016996 | 20 | 25 TGGACGCGAGCCGGGCCCTT          | miRNA | miR-5115     |
| t0017040 | 23 | 25 TCTGGGCACAGGCGGATGGACAA       | miRNA | miR-5107     |
| t0017066 | 28 | 25 TCCTGTACTGAGCTGCCCGAGACGGGA   | miRNA | miR-486-5p   |
| t0017190 | 28 | 25 TCCTGTACTGAGCTGCCCGAGCCGGCA   | miRNA | miR-486-5p   |
| t0017369 | 26 | 25 CGGGGGGAGAAGGGTTCGGGGCGGCAG   | miRNA | miR-4516     |
| t0017292 | 24 | 25 TGAGGGAGTAGGTTGTGTGGTTAA      | miRNA | miR-4510     |
| t0017196 | 21 | 25 AAACCTTTACCATTACTTAGT         | miRNA | miR-451      |
| t0017290 | 25 | 25 AAAACCGTTACCATTACTGAGTTTA     | miRNA | miR-451      |
| t0016926 | 22 | 25 GCTCCCTCTAGGGTCGCTCGGA        | miRNA | miR-4469     |
| t0016805 | 21 | 25 TGGCGGCGGTAGTTATGGGCT         | miRNA | miR-4467     |
| t0017151 | 29 | 25 TTGGTAGAGCTGAAGACTGTAGATCTTTA | miRNA | miR-4451     |
| t0017168 | 19 | 25 TGGAGAGAAAGGCAGTAGA           | miRNA | miR-4306     |
| t0017874 | 22 | 25 TTAGGGGCAGAGAGCGAGACTT        | miRNA | miR-423-5p   |
| t0017936 | 20 | 25 TGAGGTGCAGAGAGCGAGAC          | miRNA | miR-423-5p   |
| t0017849 | 21 | 25 TCGGGGCAGAGAGCGAGACT          | miRNA | miR-423-5p   |
| t0017597 | 21 | 25 TGAGGGGCAGAGAGCGAGAAG         | miRNA | miR-423-5p   |
| t0017813 | 20 | 25 ATAATACAACCTGCTAAGTG          | miRNA | miR-374c     |
| t0017818 | 23 | 25 ATTGCACGGTATCCATCTGTATT       | miRNA | miR-363      |
| t0017883 | 24 | 25 TTGAAGACTGAAGTGGAGAAGGTT      | miRNA | miR-3526     |
| t0017525 | 27 | 25 TGAAGACTGAAGTTGAGAAGGGTTTCT   | miRNA | miR-3526     |
| t0017785 | 21 | 25 GTAGTAGGTTGCATAGTAGAG         | miRNA | miR-352      |
| t0017652 | 21 | 25 GCCCCTGGGCCTATCCTAGTT         | miRNA | miR-331      |
| t0017711 | 24 | 25 AAAAGCTGGGTTGAGAGGGCGCTT      | miRNA | miR-320d     |
| t0017624 | 23 | 25 AAAAGCTGGGTTGAGAGTGCCTA       | miRNA | miR-320d     |
| t0017753 | 22 | 25 AAAAGCTGGGTTGAGAGGGCAG        | miRNA | miR-320d     |
| t0017382 | 23 | 25 AAAAGTTGGGTTGAGAGGGCGAT       | miRNA | miR-320a     |
| t0017492 | 22 | 25 AAAAGCTGGGTTGAGAGAGCGA        | miRNA | miR-320a     |
| t0017728 | 20 | 25 AAAGTTGGGTTGAGAGGGCG          | miRNA | miR-320a     |
| t0017921 | 22 | 25 AAGAGCTGGGTTGAGAGGGCGA        | miRNA | miR-320a     |
| t0017850 | 23 | 25 TATAAAATGGGGGTAGTAAGACA       | miRNA | miR-3163     |
| t0017865 | 22 | 25 GAGGAGATCGTCGAGGTTGGCA        | miRNA | miR-3150b-3p |
| t0017524 | 20 | 25 TTCGCGGGCGAAGGCAAAGT          | miRNA | miR-3124-5p  |
| t0017911 | 20 | 25 CTGGGAGAGGGTTGTTTACT          | miRNA | miR-30c-1*   |
| t0017588 | 22 | 25 CATTGCACTTATCTCGGTCTGA        | miRNA | miR-25       |
| t0017673 | 22 | 25 CAAAGTGCTCATAGTGCAGGTA        | miRNA | miR-20b      |
| t0017391 | 27 | 25 TAATACTGCCTGGTAATGATGACTATC   | miRNA | miR-200b     |
| t0017809 | 22 | 25 TGGAATGTAAAGAAGTATGTAT        | miRNA | miR-1a       |
| t0017870 | 21 | 25 CAACGGAATCCCAAAAGCAGA         | miRNA | miR-191      |
| t0017583 | 23 | 25 TGGAGAGGAAGGCAGTTCCTGAT       | miRNA | miR-185      |
| t0017723 | 24 | 25 TGGAGAGAAAGGCAGTTTCTGAAA      | miRNA | miR-185      |
| t0017854 | 21 | 25 TGGAGAGAAAGGCAGCTCCTG         | miRNA | miR-185      |
| t0017893 | 19 | 25 TGGAGAGAAAGGCAGTTCA           | miRNA | miR-185      |
| t0017529 | 25 | 25 TTTGGCAATGGTAGAACTCACAAA      | miRNA | miR-182      |
| t0017578 | 20 | 25 AACATTCATTGTTGTCGGTG          | miRNA | miR-181d-5p  |
| t0017465 | 18 | 25 ACCACTGACCGTTGACTG            | miRNA | miR-181a-2*  |
| t0017627 | 26 | 25 AACATTCAACGCTGTCGGTGAGTATC    | miRNA | miR-181a     |
| t0017463 | 20 | 25 TTAGCACGTAAATATTGGTG          | miRNA | miR-16c      |
| t0017461 | 21 | 25 ACCAATATTACTGTGCTGCTT         | miRNA | miR-16*      |
| t0017464 | 23 | 25 ATAGCAGCACATCATGGTTTACA       | miRNA | miR-15b      |
| t0017683 | 20 | 25 TGGCAGCACATCATGGTTTA          | miRNA | miR-15b      |
| t0017505 | 20 | 25 TAGCAGCACATAATGTTTTG          | miRNA | miR-15a      |
| t0017616 | 18 | 25 TCAGCACATAATGGTTTG            | miRNA | miR-15a      |
| t0017825 | 19 | 25 TAGCAGCACATAATGGGTT           | miRNA | miR-15a      |



|          |    |                                |       |             |
|----------|----|--------------------------------|-------|-------------|
| t0017886 | 20 | 25 TAGCGGCACATAATGGTTTG        | miRNA | miR-15a     |
| t0017907 | 23 | 25 GGATATCATTATATACTGTAAGT     | miRNA | miR-144*    |
| t0017796 | 19 | 25 GGATCATCATATACTGTAA         | miRNA | miR-144*    |
| t0017655 | 22 | 25 ACCACAGGGTAGAACCATGGAA      | miRNA | miR-140     |
| t0017726 | 23 | 25 TACCACAGGGTAGAACCCGCGGAC    | miRNA | miR-140     |
| t0017765 | 23 | 25 TACCACAGGGTAGAACCCCGGCC     | miRNA | miR-140     |
| t0017828 | 24 | 25 TACCACAGGGTAGAACCACGGATT    | miRNA | miR-140     |
| t0017472 | 23 | 25 CAGTGCAATGATGAAAGGGCATT     | miRNA | miR-130b    |
| t0017858 | 20 | 25 GTGAGGACTTGGGAGGTGGA        | miRNA | miR-1224    |
| t0017881 | 23 | 25 AGCAGCATTGTACAGGGCTATCT     | miRNA | miR-107     |
| t0017454 | 23 | 25 TACCGCACTGTGGGTACTTGCAT     | miRNA | miR-106b*   |
| t0017773 | 20 | 25 CCGCATTGTGGGTACTTGCT        | miRNA | miR-106b*   |
| t0017821 | 20 | 25 TAAAGTGCTGATAGTGCAGA        | miRNA | miR-106b    |
| t0017823 | 22 | 25 AGCAGCATTGTACAGGACTATG      | miRNA | miR-103a    |
| t0017788 | 26 | 25 AGCAGCATTGTACAGGGCTATGAAAA  | miRNA | miR-103a    |
| t0017847 | 21 | 25 CACAGTACTGTGATAACTGAA       | miRNA | miR-101c    |
| t0017435 | 21 | 25 TACAGTACTATGATAACTGAA       | miRNA | miR-101b    |
| t0017483 | 27 | 25 TACAGTACTGTGATAACTGAACACGGC | miRNA | miR-101     |
| t0017677 | 24 | 25 TGGAATGTAAAGAAGTGTGTATAT    | miRNA | miR-1       |
| t0017799 | 24 | 25 TGAGGTAGTAGTTTGTGCTGTTTT    | miRNA | let-7i      |
| t0017512 | 22 | 25 TGAGGTAGTAGTTTGAACAGTT      | miRNA | let-7g      |
| t0017641 | 23 | 25 TGAGGTAGTAGATTGTATACTTG     | miRNA | let-7f      |
| t0017562 | 23 | 25 AATGAGGTAGTAGATTGTATAGT     | miRNA | let-7f      |
| t0017557 | 19 | 25 CGAGGTAGTAGATTGTATA         | miRNA | let-7f      |
| t0017684 | 20 | 25 TGAGGTTGTAGATTGTATAG        | miRNA | let-7f      |
| t0017895 | 18 | 25 GAGGTAGTAGATTGTATA          | miRNA | let-7f      |
| t0017691 | 22 | 25 TGAGGTGTTAGATTGTATAGTT      | miRNA | let-7f      |
| t0017692 | 23 | 25 TGAGGTGGTAGATTGTATAGTTA     | miRNA | let-7f      |
| t0017956 | 22 | 25 AGAGGTAGTAAGTTGCATAGTT      | miRNA | let-7d      |
| t0017636 | 21 | 25 AGAGGTAGTAGTTGCATGTT        | miRNA | let-7d      |
| t0017482 | 19 | 25 CTATACAACCTACTGCCTT         | miRNA | let-7b*     |
| t0017740 | 21 | 25 TGAGGTAGTAGGTTGTGGGTT       | miRNA | let-7b      |
| t0017558 | 23 | 25 TGAGGTAGTAGGTTGTGTGGTAC     | miRNA | let-7b      |
| t0017469 | 20 | 25 TGAGGAAGTAGGTTGTGTGG        | miRNA | let-7b      |
| t0017386 | 18 | 25 TGAGGTAGTAGGTTTGGT          | miRNA | let-7a      |
| t0017409 | 22 | 25 TGAGGTAGTAGGTTGGATAGTT      | miRNA | let-7       |
| t0017445 | 27 | 25 TGAGGTAGTAGGTTGTATAGTTGATCC | miRNA | let-7       |
| t0017449 | 21 | 24 CACCCGGCTGTGTGCACATGT       | miRNA | miR-941     |
| t0017571 | 19 | 24 TACCATTGCATATCGGAG          | miRNA | miR-660     |
| t0017747 | 22 | 24 ATGCTGACATATTTACTAGAGG      | miRNA | miR-628-5p  |
| t0017853 | 22 | 24 AGAACAAATGCCGGTCCCAAGA      | miRNA | miR-589*    |
| t0017653 | 21 | 24 AAAAGTATTTGCGGGTTTTGT       | miRNA | miR-548l    |
| t0017866 | 22 | 24 CTTCCACACCCAAGGCTTGCA       | miRNA | miR-532-3p  |
| t0017697 | 21 | 24 AACAAACATGGTGCACCTTCTT      | miRNA | miR-495     |
| t0017428 | 28 | 24 TCCTGTACTGAGCTGCCCGAGACCGCA | miRNA | miR-486-5p  |
| t0017586 | 23 | 24 TAGATGTAGGATTGTGTCGGTTT     | miRNA | miR-4860    |
| t0017763 | 20 | 24 AGGACAGGAAAGTGAAGGCG        | miRNA | miR-483     |
| t0017503 | 22 | 24 AGAGTCGGCGACGCCGCCAGTT      | miRNA | miR-4785    |
| t0017473 | 22 | 24 TCTCCCTCCTGCCCTGGCAAA       | miRNA | miR-4685-3p |
| t0017591 | 23 | 24 AAAACGTTACCATTACTGAGTTT     | miRNA | miR-451     |
| t0018504 | 19 | 24 AAACCGTTAACATTACTGA         | miRNA | miR-451     |
| t0018047 | 22 | 24 AAACCGTTACCATTACTGAATT      | miRNA | miR-451     |
| t0018069 | 27 | 24 AAAACCGTTACCATTACTGAGTTTATT | miRNA | miR-451     |
| t0018364 | 23 | 24 AAACCGTTACCATTACATAGTTT     | miRNA | miR-451     |
| t0018102 | 23 | 24 AAACCGTTGCCATTACTGAGTTT     | miRNA | miR-451     |
| t0018122 | 18 | 24 AAACCGTTACCATTACGA          | miRNA | miR-451     |
| t0018061 | 21 | 24 AAACCGTTACCACCACTGAGT       | miRNA | miR-451     |
| t0018536 | 20 | 24 TGTGGGAGGAGACAGTGGCA        | miRNA | miR-4419a   |

|          |    |                               |       |              |
|----------|----|-------------------------------|-------|--------------|
| t0018123 | 21 | 24 TGAGGGGCAGAGAGCGAGAAA      | miRNA | miR-423-5p   |
| t0018513 | 19 | 24 TGAGCGGCAGAGAGCGAGA        | miRNA | miR-423-5p   |
| t0018263 | 23 | 24 TGAGGGGCAGAGACCGAGACTTA    | miRNA | miR-423-5p   |
| t0018516 | 22 | 24 TGAGGGGCAGAGAGCGATACTT     | miRNA | miR-423-5p   |
| t0018031 | 23 | 24 CGAGGGGCAGAGAGCGAGACTTA    | miRNA | miR-423-5p   |
| t0018033 | 19 | 24 AGCTCGGTCTGAGGCCCT         | miRNA | miR-423-3p   |
| t0018099 | 23 | 24 AGGCGGCGTCCGAGGCGGAGGCG    | miRNA | miR-3960     |
| t0018108 | 22 | 24 ACAGCCCGGATCCAGCCCACT      | miRNA | miR-3940-3p  |
| t0018235 | 18 | 24 CAGAAGTCAAACGGACAA         | miRNA | miR-3896-3p  |
| t0018237 | 22 | 24 ACCCGGGGGGCGGCGGCGGCG      | miRNA | miR-3885-5p  |
| t0018377 | 22 | 24 CTGGAAGTGGAGTTAGAAGGCT     | miRNA | miR-378      |
| t0018407 | 18 | 24 AATTGCACGGTATCCATC         | miRNA | miR-363      |
| t0018062 | 20 | 24 CGGGGGTGGGGTTCGGCGGGG      | miRNA | miR-3621     |
| t0018009 | 22 | 24 TTATAAAGCAATGAGACTCATT     | miRNA | miR-340-5p   |
| t0018291 | 22 | 24 AAAAGTTGGGTTGAGAGGGCAT     | miRNA | miR-320d     |
| t0018292 | 24 | 24 AAAAGCTGGGTTGAGAGGGCGGTT   | miRNA | miR-320d     |
| t0018310 | 23 | 24 AAAGCTGGGTTGAGAGGGCGTAG    | miRNA | miR-320d     |
| t0018535 | 22 | 24 AACAGCTGGGTTGAGAGGGCGA     | miRNA | miR-320a     |
| t0018499 | 22 | 24 AAAAGCTGGGTTGCGAGGGCGA     | miRNA | miR-320a     |
| t0018192 | 22 | 24 ACCTTGCGCTACTCAGGTCTGT     | miRNA | miR-3200-3p  |
| t0018245 | 19 | 24 TATAAAATGAGGGCAGTAA        | miRNA | miR-3163     |
| t0018191 | 20 | 24 TTCAGTCGGATGTTTACAGA       | miRNA | miR-30b-3p   |
| t0018464 | 19 | 24 TTCCGGCTCGAAGGACCAA        | miRNA | miR-2779     |
| t0018452 | 22 | 24 CATCGCACTTGTCTCGGTCTGA     | miRNA | miR-25       |
| t0018022 | 21 | 24 CTGGGGCGGTACATCTGTAA       | miRNA | miR-219-2-3p |
| t0018520 | 21 | 24 TACTGTAGTATGGGCACTTTT      | miRNA | miR-20b*     |
| t0017971 | 22 | 24 TTCCTATGTATATACTTCTTTG     | miRNA | miR-202-5p   |
| t0018346 | 25 | 24 TGGAAATGTAAAGAAGTATGTTTATC | miRNA | miR-1a       |
| t0018490 | 23 | 24 TGACCTATGAATTGACAGCCAAA    | miRNA | miR-192      |
| t0018503 | 23 | 24 TAGAGAGAAAGGCAGTTCCTGAA    | miRNA | miR-185      |
| t0018205 | 23 | 24 TGGAGAGAAAGGCAGCTCCTGAA    | miRNA | miR-185      |
| t0018345 | 20 | 24 TGAGGGAGGAGATTGTATAG       | miRNA | miR-1827     |
| t0018498 | 24 | 24 TTTGGCAATGGTAGAACTCACAAA   | miRNA | miR-182      |
| t0018396 | 23 | 24 ACATTCAACGCTGTCCGTGAGTT    | miRNA | miR-181a     |
| t0018325 | 24 | 24 ACTGCAGTGAAGGCACTTGTAGAA   | miRNA | miR-17*      |
| t0018247 | 22 | 24 TAGCAGCACGTATATATTGGCG     | miRNA | miR-16       |
| t0018355 | 19 | 24 TAGCAGCACGTAAATTTTG        | miRNA | miR-16       |
| t0018104 | 22 | 24 TAGAAGCACGTAAATATTGGAG     | miRNA | miR-16       |
| t0018334 | 19 | 24 TAGCGGCACATCATGGTTT        | miRNA | miR-15b      |
| t0018125 | 20 | 24 TAGCAGCCATCATGGTTTA        | miRNA | miR-15b      |
| t0018230 | 25 | 24 TAGCAGCACATCATGGTTTACAAA   | miRNA | miR-15b      |
| t0018330 | 20 | 24 TAGCAGCTCATCATGGTTTA       | miRNA | miR-15b      |
| t0017994 | 21 | 24 AGCAGCACATAATGGTTTGTG      | miRNA | miR-15a      |
| t0018100 | 22 | 24 TAGCAGCACACAATGGTTTGTG     | miRNA | miR-15a      |
| t0018441 | 21 | 24 GGATATCGTCATATACTGTAA      | miRNA | miR-144*     |
| t0018253 | 23 | 24 TACAGTATAGATGATGTACATAA    | miRNA | miR-144      |
| t0018135 | 21 | 24 TACAGTATAGATGATGTAAAA      | miRNA | miR-144      |
| t0018051 | 18 | 24 TCCATAAAGTAGAAAGCA         | miRNA | miR-142-5p   |
| t0018000 | 23 | 24 ACCACAGGGTAGAAACCGGACA     | miRNA | miR-140      |
| t0018223 | 22 | 24 TACCACAGGGTAGAACAAGGA      | miRNA | miR-140      |
| t0018326 | 21 | 24 TACCACAGGGTAGAACTACGG      | miRNA | miR-140      |
| t0018010 | 21 | 24 TACCACAGGGTAGAACCCTG       | miRNA | miR-140      |
| t0018132 | 19 | 24 TCTGGGCAACAAAGTGAGA        | miRNA | miR-1285     |
| t0018351 | 21 | 24 CTGGAGATATGGAAGAGCTGT      | miRNA | miR-1270     |
| t0018398 | 20 | 24 AGGATGAGCAAAGAAAGTAG       | miRNA | miR-1255a    |
| t0018013 | 21 | 24 TACCGCACTGTGGGTAAGTGT      | miRNA | miR-106b*    |
| t0018137 | 26 | 24 AGCAGCATTGTACAGGGCTATGACGG | miRNA | miR-103a     |
| t0018185 | 20 | 24 AGCAGCATTATACAGGGCTA       | miRNA | miR-103a     |

|          |    |                                 |       |              |
|----------|----|---------------------------------|-------|--------------|
| t0018111 | 25 | 24 TACAGTACTGTGATAACTGAAGTCC    | miRNA | miR-101      |
| t0018218 | 22 | 24 ATACAGTACTGTGATAACTGAA       | miRNA | miR-101      |
| t0018211 | 18 | 24 TGAGGTAGTAGATTGTTG           | miRNA | let-7j       |
| t0018011 | 21 | 24 TGAGGTAGTAGTTTGTGCGTT        | miRNA | let-7i       |
| t0018130 | 24 | 24 TGAGGTAGTAGTTTGTGTTGTCGG     | miRNA | let-7i       |
| t0018296 | 20 | 24 CTGTAGTAGATTGTATAGTT         | miRNA | let-7f       |
| t0018395 | 25 | 24 TGAGGTAGTAGATTGTATAGTCGTC    | miRNA | let-7f       |
| t0018264 | 19 | 24 TGTGGTAGATTGTATAGTT          | miRNA | let-7f       |
| t0018362 | 22 | 24 TGAGGTAGTAGATTGTGCAGTT       | miRNA | let-7f       |
| t0018006 | 19 | 24 TGAGGTAGGAGATTGTATA          | miRNA | let-7e       |
| t0018465 | 20 | 24 AGAGGTAGTAGTTTGCATAG         | miRNA | let-7d       |
| t0017975 | 19 | 24 TGAGGTAGTAGGTTGTATG          | miRNA | let-7c       |
| t0018369 | 25 | 24 TCAGGTAGTAGGTTGTGTGGTTATC    | miRNA | let-7b       |
| t0018117 | 20 | 24 TGAGGTAGTAGGTTGTGGTTA        | miRNA | let-7a       |
| t0018340 | 20 | 24 TGAGGTAGTAGGTTCTATAG         | miRNA | let-7        |
| t0018319 | 20 | 24 TGAGGTAGTGGGTTGTATAG         | miRNA | let-7        |
| t0017976 | 19 | 23 CACCCGTAGAACCGACCTT          | miRNA | miR-99b      |
| t0018019 | 18 | 23 AGGTGGAAGGTTGTAGGC           | miRNA | miR-965-5p   |
| t0018012 | 20 | 23 CATCCGGCTGTGTGCACATT         | miRNA | miR-941      |
| t0018252 | 21 | 23 GGGAGACTGTGAAACGGTATC        | miRNA | miR-920      |
| t0018324 | 26 | 23 AGGGCGCGCGGGTCGGGGCGGCGGTT   | miRNA | miR-638      |
| t0018489 | 21 | 23 TAGTACCAGTACCTTGTGTTC        | miRNA | miR-624*     |
| t0018056 | 18 | 23 CCTCACACCCAAGGCTTG           | miRNA | miR-532-3p   |
| t0018200 | 26 | 23 TTCTGTACTGAGCTGCCCGAGAAGA    | miRNA | miR-486-5p   |
| t0018460 | 21 | 23 TCCTGTACTGACCTGCCCCGA        | miRNA | miR-486-5p   |
| t0018119 | 23 | 23 TCCTTTACTGAGCTGCCCGAGA       | miRNA | miR-486-5p   |
| t0018109 | 26 | 23 TCCTGTACTGAGCTGCCCGACGGCC    | miRNA | miR-486-5p   |
| t0018261 | 21 | 23 TCCTGTACTGAGCTGCCCCGG        | miRNA | miR-486-5p   |
| t0018456 | 20 | 23 CGGGGCAGCTTAGTACAGGA         | miRNA | miR-486-3p   |
| t0018586 | 22 | 23 TCTCCCTTTCTGCCCTGGCTAT       | miRNA | miR-4685-3p  |
| t0018773 | 25 | 23 GCTGGGTGCGTCCGGGCTGGGGCGTT   | miRNA | miR-4651     |
| t0018720 | 23 | 23 GGGCTGGGTCCGGTCCGGGCTGGGG    | miRNA | miR-4651     |
| t0018678 | 22 | 23 CGTTACCATTACTGAGTTAAAC       | miRNA | miR-451      |
| t0018572 | 21 | 23 CGAATCCGAGTCACGGCACCA        | miRNA | miR-4454     |
| t0018637 | 23 | 23 CAAAACGTGAGGCGCTGCTATAT      | miRNA | miR-424*     |
| t0018608 | 22 | 23 TGAGGGGCAAAGAGCGAGACTT       | miRNA | miR-423-5p   |
| t0018693 | 25 | 23 TGAGGGGCAGAGAGCGAGACTTCGT    | miRNA | miR-423-5p   |
| t0018767 | 23 | 23 TGAGGGGCAGAGAGCGGGACTTA      | miRNA | miR-423-5p   |
| t0018803 | 20 | 23 AAGCTCGGTCTGAGGCCCT          | miRNA | miR-423-3p   |
| t0018949 | 23 | 23 CAGAAGTAAACGGACAAGGGGA       | miRNA | miR-3896-3p  |
| t0019033 | 28 | 23 AACTTTGAAGACTGAAGGGGAGAAGGGT | miRNA | miR-3526     |
| t0018760 | 20 | 23 ATAAAGCAATGAGACTGATT         | miRNA | miR-340-5p   |
| t0018587 | 19 | 23 TCTCTGGGCCTGTGTCTTA          | miRNA | miR-330      |
| t0018651 | 23 | 23 AAAAGCTGGGTTGAGAGGGGGTT      | miRNA | miR-320d     |
| t0018699 | 23 | 23 AAAAGCTGGGGTGAGAGGGCGAT      | miRNA | miR-320a     |
| t0018828 | 22 | 23 CTCCTGCGTAGGATCTGAGGAA       | miRNA | miR-3193     |
| t0018933 | 20 | 23 GTGGAAGGTAGACGGCCAGA         | miRNA | miR-3190     |
| t0018704 | 22 | 23 GCGGATGTAGCCAAGTGAAA         | miRNA | miR-270      |
| t0018591 | 24 | 23 TTCAAGTAATTCAGGATAGGTTAG     | miRNA | miR-26b      |
| t0018629 | 22 | 23 CATTGCACTTGCCTCGGTCTGA       | miRNA | miR-25       |
| t0018869 | 22 | 23 CATTGCACTCGTCTCGGTCTGA       | miRNA | miR-25       |
| t0018812 | 22 | 23 CATTGCACTTTTCTCGGTCTGA       | miRNA | miR-25       |
| t0019013 | 25 | 23 TGACTGGGGCGGTACATCTGTTAAT    | miRNA | miR-219-2-3p |
| t0018872 | 25 | 23 TGGAATGTAAGGAAGTGTGTACATC    | miRNA | miR-206      |
| t0018944 | 22 | 23 TAGGTAGTTCCCTGTTGTTGGA       | miRNA | miR-196b     |
| t0018876 | 21 | 23 TGACCTATGAATTGACAGCCC        | miRNA | miR-192      |
| t0018573 | 24 | 23 CAACGAAATCCCAAAGCAGCTGA      | miRNA | miR-191      |
| t0019019 | 23 | 23 CAACGGAATCCCAAAGCAGCCG       | miRNA | miR-191      |

|          |    |                                  |       |            |
|----------|----|----------------------------------|-------|------------|
| t0018947 | 22 | 23 CAGGGGCTGGCTTTCCTCTGGT        | miRNA | miR-185*   |
| t0019006 | 23 | 23 TGGAGAGGAAGGCAGTTCCTGAA       | miRNA | miR-185    |
| t0019038 | 23 | 23 TGGAGAGAAAAGCAGTTCCTGAA       | miRNA | miR-185    |
| t0018844 | 22 | 23 GGAGAGAAAGGCAGTTCCTGAT        | miRNA | miR-185    |
| t0018585 | 23 | 23 AACATTC AATGCTGTCGGTGAGT      | miRNA | miR-181a   |
| t0018963 | 23 | 23 TAGCAGCACGTA AATATTGGCAT      | miRNA | miR-16b    |
| t0018966 | 27 | 23 TAGCAGCACGTA AATATTGGCAATAAC  | miRNA | miR-16b    |
| t0018976 | 22 | 23 GGGGGCGGGGAGCGGTCCGGCG        | miRNA | miR-1607   |
| t0019070 | 21 | 23 TAGCAGCACGTA AATATTAGC        | miRNA | miR-16     |
| t0018668 | 20 | 23 TAGCAGCACATCATGGCTTA          | miRNA | miR-15b    |
| t0018871 | 21 | 23 ACTAGCAGCACATCATGGTTT         | miRNA | miR-15b    |
| t0018918 | 18 | 23 TAGCAGCACATAATGTTG            | miRNA | miR-15a    |
| t0018954 | 19 | 23 TAGCAGCACATAATGGTGT           | miRNA | miR-15a    |
| t0018969 | 20 | 23 TAGCAGCACGTAATGGTTTG          | miRNA | miR-15a    |
| t0018558 | 21 | 23 TAGCAGCACATAATGTTTTGT         | miRNA | miR-15a    |
| t0018757 | 22 | 23 CGGGCACGGGCTGGGCGAGGCT        | miRNA | miR-1587   |
| t0019126 | 19 | 23 ATACAGTATAGATGATGTA           | miRNA | miR-144    |
| t0019093 | 22 | 23 ACCACAGGGTAGAACCATGGAC        | miRNA | miR-140    |
| t0018570 | 24 | 23 TACCACAGGGTAGAACCACGGGCA      | miRNA | miR-140    |
| t0018996 | 22 | 23 ACCACATGGTAGAACCACGGAT        | miRNA | miR-140    |
| t0019116 | 23 | 23 CACCACAGGGTAGAACCACGGAA       | miRNA | miR-140    |
| t0018798 | 22 | 23 ACCACAGGGAAGAACCACGGAT        | miRNA | miR-140    |
| t0018731 | 23 | 23 TACCACAGGGTAGAACCAAGGAT       | miRNA | miR-140    |
| t0018733 | 22 | 23 ACCACAGGGTAGAACCACAGAC        | miRNA | miR-140    |
| t0018644 | 22 | 23 TACCAAAGGGTAGAACCACGGA        | miRNA | miR-140    |
| t0018695 | 23 | 23 ACCACAGGGTAGAACCAAGGACA       | miRNA | miR-140    |
| t0018817 | 24 | 23 TACAACAGGGTAGAACCACGGACA      | miRNA | miR-140    |
| t0019099 | 24 | 23 CACCACAGGGTAGAACCACGGACA      | miRNA | miR-140    |
| t0018815 | 23 | 23 CAGTGCAATGATGAAAGGGCAAA       | miRNA | miR-130b   |
| t0018771 | 22 | 23 CTCGGCGTGGCGTCCGGTCTGTA       | miRNA | miR-1307   |
| t0018680 | 23 | 23 TGAGAGGCAGAGGTTGCAGTGGA       | miRNA | miR-1273f  |
| t0018689 | 22 | 23 AGCAGCATTCTACAGGGCTATG        | miRNA | miR-103a   |
| t0018700 | 21 | 23 AGCAGCATTGCACAGGGCTAT         | miRNA | miR-103a   |
| t0018772 | 22 | 23 AGCAGCATCGTACAGGGCTATG        | miRNA | miR-103a   |
| t0018774 | 23 | 23 AGCAGCCTTGTACAGGGCTATGA       | miRNA | miR-103a   |
| t0018790 | 18 | 23 GTTACTGTGATAACTGAA            | miRNA | miR-101c   |
| t0018921 | 22 | 23 GTACAGTACTGTGATAAATGAA        | miRNA | miR-101    |
| t0018960 | 29 | 23 TACAGTACTGTGATAACTGAACTCTGAAC | miRNA | miR-101    |
| t0018980 | 21 | 23 TACAGTACTGTGATAACCGAA         | miRNA | miR-101    |
| t0019035 | 21 | 23 TGAGGTAGTTGTTTGTGCTGT         | miRNA | let-7i     |
| t0019065 | 21 | 23 TGAGGTAGTAGTTTGTGCAGT         | miRNA | let-7g     |
| t0018852 | 22 | 23 TGAGGTAGTAGATTGTATGCTT        | miRNA | let-7f-5p  |
| t0018686 | 23 | 23 ATGAGGTAGTAGATTGTATAGTG       | miRNA | let-7f     |
| t0019081 | 20 | 23 AGAGGTGGTAGGTTGCATAG          | miRNA | let-7d     |
| t0018811 | 26 | 23 AAGAGGTAGTAGGTTGCATAGTAATT    | miRNA | let-7d     |
| t0018897 | 21 | 23 GGAGGTAGTAGGTTGTGTGGT         | miRNA | let-7b     |
| t0018995 | 20 | 23 TGAGGTAGTAGGTTGTGGGT          | miRNA | let-7b     |
| t0019118 | 22 | 23 TCTGGTAGTAGGTTGTGTGGTT        | miRNA | let-7b     |
| t0018694 | 19 | 23 TGAGGTAGTAGGTTGTGTTT          | miRNA | let-7a     |
| t0018685 | 20 | 23 TTAGGTAGTAGGTTGTATAG          | miRNA | let-7      |
| t0018800 | 21 | 23 TGAGGTAGTAGGTTTTATAGT         | miRNA | let-7      |
| t0018920 | 22 | 22 CAAGGAAATAGTCAGACGGGAT        | miRNA | miR-994-5p |
| t0018965 | 22 | 22 CAAATTGCTGTTCGTGCAGGTA        | miRNA | miR-93     |
| t0018749 | 21 | 22 TATTGCACTTGTCTCGGCCTT         | miRNA | miR-92b    |
| t0018781 | 23 | 22 TATTGCACTTGTCCCGGCTTGTG       | miRNA | miR-92a    |
| t0018984 | 25 | 22 TAATACTGTCAGGTAAGATGTATC      | miRNA | miR-8-3p   |
| t0018566 | 19 | 22 GACTATAGAACTTTCCCCC           | miRNA | miR-625*   |
| t0018632 | 21 | 22 TTATGGTTTGCTGGGACTGA          | miRNA | miR-584    |

|          |    |                                  |       |              |
|----------|----|----------------------------------|-------|--------------|
| t0018643 | 19 | 22 AAGATGTGGAAAAATTGGA           | miRNA | miR-576-3p   |
| t0019103 | 23 | 22 TGGGCACAGGCGGATGGACAGTA       | miRNA | miR-5107     |
| t0019107 | 20 | 22 TAGCAGCGGGTACAGTTCTG          | miRNA | miR-503      |
| t0019040 | 21 | 22 TAGCAGCGGGAACAGTTCTAA         | miRNA | miR-503      |
| t0018579 | 20 | 22 TCCTGTACTGAGCTGCCCCC          | miRNA | miR-486-5p   |
| t0018937 | 24 | 22 TCGTACTGAGCTGCCCCGAGTAAA      | miRNA | miR-486-5p   |
| t0019290 | 25 | 22 TCCTGTACTGAGCTGCCCCGAGTAA     | miRNA | miR-486-5p   |
| t0019641 | 22 | 22 TACTGTACTGAGCTGCCCCGAG        | miRNA | miR-486-5p   |
| t0019611 | 23 | 22 TCCTGTACTGAGCTGCCCTAGA        | miRNA | miR-486-5p   |
| t0019266 | 21 | 22 ACCTGTACTGAGCTGCCCCGA         | miRNA | miR-486-5p   |
| t0019480 | 29 | 22 TCCTGTACTGAGCTGCCCCGAGTCCGGCA | miRNA | miR-486-5p   |
| t0019538 | 23 | 22 ATACACACACACACATACACAGA       | miRNA | miR-466b-2*  |
| t0019640 | 25 | 22 GCTGGGTTCGGTCGGGCTGGGGCGCG    | miRNA | miR-4651     |
| t0019690 | 21 | 22 TGAGGGAGTAGGGTGTGTGGT         | miRNA | miR-4510     |
| t0019763 | 22 | 22 AAACCGGTACCATTACTGAGTT        | miRNA | miR-451      |
| t0019251 | 20 | 22 AAACCGTTACCATTACTGAC          | miRNA | miR-451      |
| t0019728 | 22 | 22 AAACCGTTACCATTACTGAGTC        | miRNA | miR-451      |
| t0019218 | 23 | 22 AAACCGCTACCATTACTGAGTTT       | miRNA | miR-451      |
| t0019394 | 21 | 22 AAACCGTTACCATTACGGAGT         | miRNA | miR-451      |
| t0019402 | 21 | 22 AACCGTTACCATTACTGAGTA         | miRNA | miR-451      |
| t0019444 | 23 | 22 AAACCGTTACCATTACAGAGTTT       | miRNA | miR-451      |
| t0019559 | 25 | 22 AAACCGTTACCATTACTGATTTTAG     | miRNA | miR-451      |
| t0019565 | 20 | 22 TCCGGGACGGCTGGGAAGGC          | miRNA | miR-4497     |
| t0019706 | 18 | 22 TTTGGAGGAGATGCGGTT            | miRNA | miR-4443     |
| t0019405 | 23 | 22 TCAGGGGCAGAGATCGAGACTTT       | miRNA | miR-423-5p   |
| t0019528 | 24 | 22 TGAGGGGCAGAGAGCGAGACTATA      | miRNA | miR-423-5p   |
| t0019441 | 24 | 22 TGAGGGGCAGAGAGCGAGACTTAC      | miRNA | miR-423-5p   |
| t0019313 | 23 | 22 TCAGGGGCAGAGAGCGAGACTTT       | miRNA | miR-423-5p   |
| t0019372 | 20 | 22 TGAGGGGCAGAGAGCGTGAC          | miRNA | miR-423-5p   |
| t0019459 | 21 | 22 AGCTCGGTCTGAGGCCCTTCA         | miRNA | miR-423-3p   |
| t0019595 | 24 | 22 ATGGACTCGCAGGAACAGGCTCTT      | miRNA | miR-4001b-5p |
| t0019629 | 25 | 22 ACTGTACTTGGAGTCAGAAAGCATC     | miRNA | miR-378      |
| t0019720 | 21 | 22 ACTGGACTTGGAGTCAGAAAG         | miRNA | miR-378      |
| t0019738 | 19 | 22 ATGCACGGTATCCATCTG            | miRNA | miR-363      |
| t0019748 | 28 | 22 TGAAGACTGAAGTGGAGAAGGGTTTCTT  | miRNA | miR-3526     |
| t0019425 | 30 | 22 TGAAGACTGAAGTGGAGAAGGGTTTCTTC | miRNA | miR-3526     |
| t0019461 | 18 | 22 TGAAGACTGAAGTGGAGA            | miRNA | miR-3526     |
| t0019173 | 22 | 22 CCCTCGAACTGTTGTGGCCATT        | miRNA | miR-3487     |
| t0019181 | 21 | 22 TGAGCGCCTCGACGACAGAGA         | miRNA | miR-339-3p   |
| t0019225 | 23 | 22 AAAAGCTGGGGTGTAGAGGGCGTT      | miRNA | miR-320d     |
| t0019285 | 23 | 22 AAAAGCTGGGTTGAGAGGGCGCG       | miRNA | miR-320d     |
| t0019664 | 23 | 22 AATCTGAGAAGGCGCACAAAGGTA      | miRNA | miR-3200-5p  |
| t0019624 | 20 | 22 TCTGGGAGGTTGTAGCAGTG          | miRNA | miR-3192     |
| t0019257 | 22 | 22 GTGGAAGGTAGACGGCCAGAGT        | miRNA | miR-3190     |
| t0019452 | 21 | 22 TGGAAGGTAGACGGCCAGACG         | miRNA | miR-3190     |
| t0019754 | 22 | 22 AGCTTTTGGGAATTCAGGTAGA        | miRNA | miR-3140-3p  |
| t0019638 | 25 | 22 CTTTCAGTCGGATGTTTACAGCATC     | miRNA | miR-30e*     |
| t0019303 | 24 | 22 CGCGCGGGTCGGGGGGCGGGGCGG      | miRNA | miR-2981     |
| t0019561 | 21 | 22 TTCAAGTAATTCAGGACAGGT         | miRNA | miR-26b      |
| t0019770 | 21 | 22 TTGGGGAAACGGCCGCTGAGA         | miRNA | miR-2110     |
| t0019470 | 23 | 22 TGTGCAAATCCATGCAAAACTAA       | miRNA | miR-19b      |
| t0019195 | 22 | 22 TGGGTCTTTGCGGGTGTAGATGA       | miRNA | miR-193a-5p  |
| t0019370 | 21 | 22 AACGGAATCCAAAAGCAGCC          | miRNA | miR-191      |
| t0019630 | 20 | 22 CGGCGGGGACGGCCGATTGGT         | miRNA | miR-1908     |
| t0019230 | 19 | 22 AGAGAAAGGCAGTTCCTGA           | miRNA | miR-185      |
| t0019244 | 23 | 22 TGGAGAGAAAGGCAGTTCCTGTG       | miRNA | miR-185      |
| t0019601 | 21 | 22 TGGAGAGAAAGCCAGTTCCTG         | miRNA | miR-185      |
| t0019634 | 22 | 22 TGGAGAGAAAGGCAGTTCAGTA        | miRNA | miR-185      |

|          |    |                                 |       |            |
|----------|----|---------------------------------|-------|------------|
| t0019133 | 22 | 22 TGGACGGAGAACTGATAGGGGC       | miRNA | miR-184-3p |
| t0019454 | 22 | 22 TGGACGGAGAACTGATAAGGGT       | miRNA | miR-184    |
| t0019340 | 28 | 22 TATGGCACTTGTAGAATTCACATAACAG | miRNA | miR-183    |
| t0019645 | 21 | 22 GAGGGAGTAGATTGTATAGTT        | miRNA | miR-1827   |
| t0019543 | 20 | 22 AACATTC AACGTTGTCGGTG        | miRNA | miR-181a   |
| t0019349 | 24 | 22 TAGCAGCACGTAATATTGGCTCC      | miRNA | miR-16b    |
| t0019585 | 24 | 22 GAAGCGCGATGGCGGAGCTGAAA      | miRNA | miR-1636   |
| t0019137 | 18 | 22 AGCACGTAAATATTGGCG           | miRNA | miR-16     |
| t0019364 | 24 | 22 TAGCAGCACGTAATATTGGCGGA      | miRNA | miR-16     |
| t0019317 | 20 | 22 TAGCAGCACATCACGGTTTA         | miRNA | miR-15b    |
| t0019487 | 24 | 22 AAAGTAGCAGCACATCATGGTTTA     | miRNA | miR-15b    |
| t0019594 | 20 | 22 AGCAGCACATAATGGTTTAA         | miRNA | miR-15b    |
| t0019599 | 23 | 22 TAGCAGCACATAATGGTTTGTAA      | miRNA | miR-15a    |
| t0019328 | 20 | 22 CCCATAAAGTAGAAAGCATC         | miRNA | miR-142    |
| t0019730 | 22 | 22 TACCCAGGGTAGAACCACGGA        | miRNA | miR-140    |
| t0019134 | 22 | 22 TACGACAGGGTAGAACCACGGA       | miRNA | miR-140    |
| t0019642 | 21 | 22 CCACAGGGTAGAACTACGGAT        | miRNA | miR-140    |
| t0019544 | 23 | 22 TACCACAGGGTAGAAACACGGAT      | miRNA | miR-140    |
| t0019140 | 23 | 22 TACCACAGGGTAGAACCACAGAA      | miRNA | miR-140    |
| t0019672 | 22 | 22 ACCACAGGGTAGAACCACGGGC       | miRNA | miR-140    |
| t0019521 | 21 | 22 TACCACAGGGGAGAACCACGG        | miRNA | miR-140    |
| t0019737 | 22 | 22 ATCACAGGGTAGAACCACGGAT       | miRNA | miR-140    |
| t0019265 | 24 | 22 ACCACAGGGTAGAACCACGGAGGA     | miRNA | miR-140    |
| t0019583 | 23 | 22 TACCACAGGATAGAACCACGGAC      | miRNA | miR-140    |
| t0019675 | 19 | 22 CTCGGCGTGGCTTCGGTCG          | miRNA | miR-1307   |
| t0019526 | 18 | 22 ATTTTAGAGACGGGGTTG           | miRNA | miR-1303   |
| t0019315 | 23 | 22 TAGGGCCCTGGCTCCATCTCCTT      | miRNA | miR-1296   |
| t0019152 | 25 | 22 TCTGGGCAACAAAGTGAGACCTGAT    | miRNA | miR-1285   |
| t0019169 | 21 | 22 ATCCCACCGCTGCCACCAAAA        | miRNA | miR-1260b  |
| t0019184 | 19 | 22 TACCCTGTAGATCCGAATT          | miRNA | miR-10a    |
| t0019286 | 20 | 22 GCGCACTGTGGGTACTTGCT         | miRNA | miR-106b*  |
| t0019448 | 25 | 22 TACCGCACTGTGGGTACTTGCTAAA    | miRNA | miR-106b*  |
| t0019467 | 23 | 22 AGCAGCATTGTACAGGGCTCTGA      | miRNA | miR-103a   |
| t0019657 | 23 | 22 GGCAGCATTGTACAGGGCTATGA      | miRNA | miR-103a   |
| t0019659 | 21 | 22 AGCAGCATCGTACACGGCTAT        | miRNA | miR-103a   |
| t0019685 | 21 | 22 AGCAGCATTGAACAGGGCTAT        | miRNA | miR-103a   |
| t0019729 | 22 | 22 AGCAGCATTGTACAGGGCTGTG       | miRNA | miR-103a   |
| t0019325 | 23 | 22 AGCAGCGTTGTACAGGGCTATGA      | miRNA | miR-103a   |
| t0019649 | 21 | 22 GTACAGTACTGTGATAACTAA        | miRNA | miR-101    |
| t0019643 | 27 | 22 GTACAGTACTGTGATAACTGAACCGGC  | miRNA | miR-101    |
| t0019304 | 22 | 22 TGAGGTAATAGTTTGTACAGTT       | miRNA | let-7g     |
| t0019164 | 21 | 22 TGAGGTAGTAGTTTCTACAGT        | miRNA | let-7g     |
| t0019488 | 23 | 22 TGAGGTAGTAGATTGTATAGAAA      | miRNA | let-7f-5p  |
| t0019236 | 20 | 22 GTGAGGTAGTAGATTGTATA         | miRNA | let-7f     |
| t0019490 | 21 | 22 GTAGTAGATTGTATAGTTGAG        | miRNA | let-7f     |
| t0019254 | 24 | 22 TGAGGTAGTAGATTGTATAGTTGC     | miRNA | let-7f     |
| t0019421 | 24 | 22 TTAGAGGTAGTAGGTTGCATAGTT     | miRNA | let-7d     |
| t0019471 | 20 | 22 TGAGGTAGTAGCTTGTGTGG         | miRNA | let-7b     |
| t0019586 | 20 | 22 TGAGGCAGTAGGTTGTGTGG         | miRNA | let-7b     |
| t0019761 | 20 | 22 TGATGTAGTAGGTTGTGTGG         | miRNA | let-7b     |
| t0019774 | 22 | 22 TGAGGCAGTAGGTTGTGTGGTA       | miRNA | let-7b     |
| t0019283 | 19 | 22 TGAGGTAGTAGATTTGTTA          | miRNA | let-7a     |
| t0019435 | 24 | 22 TGAGGTAGTAGGTTGTATAGAAAA     | miRNA | let-7-5p   |
| t0019398 | 20 | 22 AGGTAGTAGGTTGTATAGTT         | miRNA | let-7      |
| t0019557 | 21 | 22 TGAAGTAGTAGGTTGTATAGT        | miRNA | let-7      |
| t0019183 | 24 | 22 TGAGGTAGTAGGTTGTATAGTTAT     | miRNA | let-7      |
| t0019326 | 18 | 22 TGAGGTAGTAGGTTGTAA           | miRNA | let-7      |
| t0019529 | 20 | 22 TGAGGTAGTAGGATGTATAG         | miRNA | let-7      |

|          |    |                                  |       |             |
|----------|----|----------------------------------|-------|-------------|
| t0019627 | 19 | 21 CAGGTGGAAGGTTGTAGGC           | miRNA | miR-965-5p  |
| t0019577 | 25 | 21 GGTGGAAGGTTGTAGGCATGTATCT     | miRNA | miR-965-5p  |
| t0019155 | 25 | 21 CACCCGGCTGTGTGCACATGTGAAA     | miRNA | miR-941     |
| t0019261 | 22 | 21 AGGTTGGGATCGGTTGCAATGT        | miRNA | miR-92a-1*  |
| t0019546 | 29 | 21 GAAGACTGAAGTGGAGAAGGGTTTCTTG  | miRNA | miR-739     |
| t0019701 | 22 | 21 AAAGTAATTGCGGTTTTTACT         | miRNA | miR-548w    |
| t0019747 | 23 | 21 GCAAAGTAATTGCGGTCTTTGG        | miRNA | miR-548j    |
| t0019418 | 24 | 21 GGGGCCCGGGGGCGGGCGGATC        | miRNA | miR-5126    |
| t0019174 | 26 | 21 CTGGTGCAGGACCAGGGGAATCCGACT   | miRNA | miR-5109    |
| t0019302 | 23 | 21 TCCTGTACTAAGCTGCCCGAGA        | miRNA | miR-486-5p  |
| t0019363 | 23 | 21 TCCTGTACTGAGCTGCCCGGGA        | miRNA | miR-486-5p  |
| t0019702 | 22 | 21 TCCTGTACTGAGCTGGCCCGAG        | miRNA | miR-486-5p  |
| t0019716 | 23 | 21 CGGGGCAGCTCAGTACAGGATAT       | miRNA | miR-486-3p  |
| t0020078 | 21 | 21 TCGGGCGGAGGTGGTTGAGTG         | miRNA | miR-4750    |
| t0020352 | 23 | 21 TGTAGAGCAGGGAGCAGGAAGAT       | miRNA | miR-4732-5p |
| t0020150 | 23 | 21 TGTAGAGCAGGGCGCAGGAAGCT       | miRNA | miR-4732-5p |
| t0020233 | 21 | 21 GAAGGGTCGGGGCGGCAGTTT         | miRNA | miR-4516    |
| t0020294 | 23 | 21 GAGAGAAGGGTCGGGGCGGCAGG       | miRNA | miR-4516    |
| t0020363 | 22 | 21 TGAGGGAGTAGGGTGTGTGGTT        | miRNA | miR-4510    |
| t0020060 | 19 | 21 AACCGTTACCATTACTGAG           | miRNA | miR-451     |
| t0020189 | 21 | 21 AGACCGTTACCATTACTGAGT         | miRNA | miR-451     |
| t0020360 | 21 | 21 AAACCGTTACCATTATTCAGT         | miRNA | miR-451     |
| t0019831 | 23 | 21 AAACCGATAACCATTACTGAGTTT      | miRNA | miR-451     |
| t0019868 | 21 | 21 AAACCGTTATCATTACTGATT         | miRNA | miR-451     |
| t0019943 | 26 | 21 AGCGAAACCGTTATCATTACTGAGTT    | miRNA | miR-451     |
| t0020376 | 30 | 21 AAACCGTTACCATTACTGAGTTCGTCCGG | miRNA | miR-451     |
| t0019936 | 20 | 21 AAACCGCTACCATTACTGAG          | miRNA | miR-451     |
| t0020184 | 19 | 21 GGGTGCGGGCCCGCGGGGT           | miRNA | miR-4466    |
| t0020408 | 23 | 21 TCGAATCCGAGTCACGGCACCAA       | miRNA | miR-4454    |
| t0020312 | 21 | 21 TGAGGGGCAGTGAGCGAGACT         | miRNA | miR-423-5p  |
| t0020318 | 21 | 21 TGAGGGGCAGATAGCGAGACA         | miRNA | miR-423-5p  |
| t0020115 | 23 | 21 TGAGGGGCAGAGGGCGAGACTTA       | miRNA | miR-423-5p  |
| t0019856 | 23 | 21 TGAGGGGCAGAGAGAGAGAATTT       | miRNA | miR-423-5p  |
| t0020018 | 21 | 21 TGAGGGGCAGAGAGAGAGAAT         | miRNA | miR-423-5p  |
| t0020052 | 22 | 21 TGAGGGGCACAGAGCGAGACTT        | miRNA | miR-423-5p  |
| t0020146 | 22 | 21 TAAGGTAGTAGTTTGTACAGTT        | miRNA | miR-3962    |
| t0020249 | 21 | 21 TGAGTAGTAGTTTGTACAGTT         | miRNA | miR-3962    |
| t0020354 | 22 | 21 TAAGGGGTGTATGGCAGATGCG        | miRNA | miR-3936    |
| t0020369 | 21 | 21 CGGCGAGTCGGGTTGTTTGGG         | miRNA | miR-3787    |
| t0020372 | 22 | 21 TCAAAATCGTTGGCAATGGCTT        | miRNA | miR-3495    |
| t0020244 | 21 | 21 TTATAAAGCAATGAGACTATT         | miRNA | miR-340-5p  |
| t0020342 | 25 | 21 AAAAGCTGGGTTGAGAGGGCGTTAA     | miRNA | miR-320d    |
| t0019792 | 23 | 21 AAAAGCTGGGTTGAGGGGGCGAA       | miRNA | miR-320a    |
| t0020134 | 22 | 21 AAAAGCTGGATTGAGAGGGCGA        | miRNA | miR-320a    |
| t0020216 | 21 | 21 GAAGGGAGAAGAGCTTTAATG         | miRNA | miR-3202    |
| t0020222 | 21 | 21 TCTGGGAGGTTGTAGCAGTGA         | miRNA | miR-3192    |
| t0020410 | 20 | 21 AGAGGCTTTGTGCGGATACA          | miRNA | miR-3188    |
| t0020417 | 22 | 21 TGCACGGCACTGGGGACACGTT        | miRNA | miR-3177-3p |
| t0019793 | 22 | 21 TGGGACAAACGGACGGTTTTTA        | miRNA | miR-3122    |
| t0020179 | 19 | 21 AGCTTTCAGTCGGATGTTT           | miRNA | miR-30e*    |
| t0020088 | 21 | 21 GCCTGTAAACTGGTATGCTCT         | miRNA | miR-3048    |
| t0019805 | 23 | 21 AGTGCAATGATATTGTCAAAGCA       | miRNA | miR-301b    |
| t0020171 | 21 | 21 ACTGATTTCTTTGGTGTTC           | miRNA | miR-29a*    |
| t0019898 | 22 | 21 TAGCACCATTTGAAATCGGTTG        | miRNA | miR-29a     |
| t0020137 | 18 | 21 TCCGGCTCGAAGGACCAT            | miRNA | miR-2779    |
| t0019808 | 19 | 21 TCAGTCTTGTCGAATGGTG           | miRNA | miR-2766    |
| t0020412 | 19 | 21 TTCAAGTAATTCAGGATAG           | miRNA | miR-26b     |
| t0020261 | 18 | 21 GCACTTGTCTCGGTCTGA            | miRNA | miR-25      |

|          |    |                                |       |              |
|----------|----|--------------------------------|-------|--------------|
| t0020208 | 22 | 21 CATTGCACTTGTCCCGGTCTGA      | miRNA | miR-25       |
| t0019924 | 22 | 21 CATTGCACTTGTATCGGTCTGA      | miRNA | miR-25       |
| t0020127 | 20 | 21 TGGCTCAGTTTAGCAGGAAC        | miRNA | miR-24       |
| t0020196 | 22 | 21 TGGGTTCCCTGGCATGCTGATTT     | miRNA | miR-23b*     |
| t0019932 | 18 | 21 AATCACATTGCCAGGGAT          | miRNA | miR-23a      |
| t0020199 | 20 | 21 GACTGTGGCGGTACATCTGT        | miRNA | miR-219-2-3p |
| t0020398 | 18 | 21 AGAGGTAGGTTGCATAGT          | miRNA | miR-1961     |
| t0020158 | 22 | 21 CAACGGAATCCCAAAAGCCGCT      | miRNA | miR-191      |
| t0020328 | 21 | 21 AACGGAATCTCAAAGCAGCT        | miRNA | miR-191      |
| t0020405 | 21 | 21 AGGAGAGAAAGGCAGTTCCTG       | miRNA | miR-185      |
| t0020200 | 24 | 21 TGGAGAGAAAGGCAGTTCCTGAGG    | miRNA | miR-185      |
| t0020250 | 21 | 21 TGGAGAGAACGGCAGTTCCTG       | miRNA | miR-185      |
| t0019951 | 20 | 21 TGGAGAGAAAGGCAGTTCAT        | miRNA | miR-185      |
| t0020155 | 23 | 21 TGGAGAGAAAGACAGTTCCTGAA     | miRNA | miR-185      |
| t0020217 | 21 | 21 TGAGGGAGGAGATTGTATAGT       | miRNA | miR-1827     |
| t0020392 | 23 | 21 CAAAGTGCTTACAGTGCAGGTAA     | miRNA | miR-17a      |
| t0020231 | 19 | 21 CAAAGTGCTTACAGTGCAG         | miRNA | miR-17       |
| t0019976 | 19 | 21 TAGCAGCTAAATATTGGCG         | miRNA | miR-16c      |
| t0020260 | 21 | 21 TGGGGGCGGGGAGCGGTCGGG       | miRNA | miR-1607     |
| t0020257 | 27 | 21 GGGGCGGGGAGCGGTCGGGCGGCGGCG | miRNA | miR-1607     |
| t0020081 | 26 | 21 CTGGGGGCGGGGAGCGGTCGGGCGGC  | miRNA | miR-1607     |
| t0020112 | 19 | 21 TGGGGGCGGGGAGCGGTCG         | miRNA | miR-1607     |
| t0019790 | 22 | 21 TAGCAGCATGTATATATTGGCG      | miRNA | miR-16       |
| t0019799 | 24 | 21 GTTAGCAGCACGTAATATTGGCG     | miRNA | miR-16       |
| t0019893 | 19 | 21 TAGAAGCACATCATGGTTT         | miRNA | miR-15b      |
| t0020027 | 19 | 21 TAGCAGCTCATCATGGTTT         | miRNA | miR-15b      |
| t0020415 | 20 | 21 TAGCAGCACATCATAGTTTA        | miRNA | miR-15b      |
| t0020339 | 20 | 21 TAGCAGCACATCATGGGCTA        | miRNA | miR-15b      |
| t0019794 | 21 | 21 TAGCAGCATATAATGGTTTGT       | miRNA | miR-15a      |
| t0019894 | 20 | 21 CAGCAGCACATAATGGTTTG        | miRNA | miR-15a      |
| t0020283 | 21 | 21 CTACAGTATAGATGATGTA         | miRNA | miR-144      |
| t0019866 | 18 | 21 TACAGTATAGATGATGTC          | miRNA | miR-144      |
| t0020175 | 20 | 21 CTCATAAAGTAGAAAGCATT        | miRNA | miR-142-5p   |
| t0020272 | 23 | 21 ACCACAGGGTAGAACCACGGCCT     | miRNA | miR-140      |
| t0020335 | 23 | 21 TAACACAGGGTAGAACCACGGAA     | miRNA | miR-140      |
| t0019885 | 22 | 21 TACCACAGGGTAGAACCAGGGA      | miRNA | miR-140      |
| t0020203 | 22 | 21 ACAACAGGGTAGAACCACGGAC      | miRNA | miR-140      |
| t0020020 | 20 | 21 ACCACAGGGGAGAACCACGG        | miRNA | miR-140      |
| t0020119 | 23 | 21 TACCACGGGGTAGAACCACGGAA     | miRNA | miR-140      |
| t0020338 | 21 | 21 CTCGGCGTGGCGTCGGTCGTT       | miRNA | miR-1307     |
| t0020344 | 25 | 21 TCGTACCGTGAGTAATAATGCAATC   | miRNA | miR-126      |
| t0020104 | 23 | 21 AAGCAGCATTGTACAGGGCTATT     | miRNA | miR-107      |
| t0020288 | 23 | 21 AGCAGCATTGTACAGGGCTATTG     | miRNA | miR-107      |
| t0019997 | 24 | 21 CCGCACTGTGGGTA              | miRNA | miR-106b*    |
| t0020253 | 21 | 21 TAAAGTGCTGACAGTGCCGAT       | miRNA | miR-106b     |
| t0020425 | 21 | 21 AGCAGCGTTGTACAGGGCTAT       | miRNA | miR-103a     |
| t0019785 | 22 | 21 AGCAGCCTTGTACAGGGCTATG      | miRNA | miR-103a     |
| t0019845 | 20 | 21 AGCAGAATTGTACAGGGCTA        | miRNA | miR-103a     |
| t0019873 | 23 | 21 AACAGCATTGTACAGGGCTATGA     | miRNA | miR-103a     |
| t0019931 | 20 | 21 AGCAGCATTGTACAGGGCTC        | miRNA | miR-103a     |
| t0020242 | 21 | 21 AGCAGCATTGTACGGGGCTAT       | miRNA | miR-103a     |
| t0020302 | 22 | 21 TACAGTACTGTGATAACTCAAG      | miRNA | miR-101      |
| t0019991 | 25 | 21 ATACCCTGTAGATACGAATTTGATC   | miRNA | miR-10       |
| t0020157 | 22 | 21 TGAGGTAGTAGTTTGTACAGAT      | miRNA | let-7g       |
| t0020170 | 21 | 21 TGAGGCAGTAGTTTGTACAGT       | miRNA | let-7g       |
| t0020418 | 21 | 21 TGAGGTAGTAGATTGTATAGT       | miRNA | let-7f-5p    |
| t0019815 | 20 | 21 TGAGGTAGTAGATTGTAATT        | miRNA | let-7f-5p    |
| t0020205 | 23 | 21 CGAGGTAGTAGATTGTATAGTTA     | miRNA | let-7f       |



|          |    |                                  |       |             |
|----------|----|----------------------------------|-------|-------------|
| t0019826 | 19 | 21 TGAGGTAGTAGATTGTACA           | miRNA | let-7f      |
| t0019840 | 23 | 21 TGAGGTAGTAGATTGTATAGGTT       | miRNA | let-7f      |
| t0019941 | 19 | 21 TGAGGTAGTAGAGTGTATA           | miRNA | let-7f      |
| t0020279 | 21 | 21 TGAGGTAGTAGATTGTACATT         | miRNA | let-7f      |
| t0020357 | 19 | 21 TAGGTAGTAGATTGTATAG           | miRNA | let-7f      |
| t0020382 | 20 | 21 AGAGGTAGTAGGTTGTATAG          | miRNA | let-7d      |
| t0020032 | 21 | 21 AGAGGTAGTAGGTTGCGTAGT         | miRNA | let-7d      |
| t0020162 | 22 | 21 AGAGGTAGTAGGTTGCATCGTT        | miRNA | let-7d      |
| t0019877 | 23 | 21 TGAGGTAGTAGGGTGTGTGGTTA       | miRNA | let-7b      |
| t0020322 | 21 | 21 TGAAGTAGTAGGTTGTGTGGT         | miRNA | let-7b      |
| t0020284 | 28 | 21 GATCTGAGGTAGTAGGTTGTGTGGTTAA  | miRNA | let-7b      |
| t0020374 | 20 | 21 TGAGGTAGTAGGTTGTGCGG          | miRNA | let-7b      |
| t0019853 | 22 | 21 TGAGGTAGTAGGTTGTATAATT        | miRNA | let-7       |
| t0019939 | 24 | 21 TGAGGTAGGAGGTTGTATAGTTGA      | miRNA | let-7       |
| t0020025 | 21 | 20 TATACAACTTACTACTTTCCT         | miRNA | miR-98*     |
| t0020326 | 35 | 20 ATTGCACTTGTCCCGCCTGTAATACTCTC | miRNA | miR-92b-3p  |
| t0020337 | 19 | 20 TATTGCACTTGTCCCGGCA           | miRNA | miR-92a     |
| t0020393 | 18 | 20 GGGCAGGTGGTGTAGTGG            | miRNA | miR-885     |
| t0019870 | 19 | 20 TAGGAGATGGCGCAGGGGA           | miRNA | miR-877     |
| t0019995 | 23 | 20 AGGGCGCGCGGGTCGGGGCGGCG       | miRNA | miR-638     |
| t0020221 | 22 | 20 TCTTTTCTTTGAGACTCACTAT        | miRNA | miR-627     |
| t0019983 | 22 | 20 TACGTCATCGTTGTCATCATCT        | miRNA | miR-598     |
| t0020037 | 22 | 20 GAGCTTATTCATAAAAGTGCAA        | miRNA | miR-590-5p  |
| t0020113 | 28 | 20 TCCTGTACTGAGCTGCCCGAGACGGCC   | miRNA | miR-486-5p  |
| t0020223 | 27 | 20 TCCTGTACTGAGCTGCCCGAGAAGAA    | miRNA | miR-486-5p  |
| t0019972 | 26 | 20 TCCTGTACTGAGCTGCCCGAGACCA     | miRNA | miR-486-5p  |
| t0020285 | 21 | 20 TCCTGTACTGAGCTGCGCCGA         | miRNA | miR-486-5p  |
| t0020554 | 22 | 20 AGGGAAGGAGGCTTGGTCTTAG        | miRNA | miR-4747-5p |
| t0020563 | 21 | 20 TGGGAAGAGGAGCTGAGGGAA         | miRNA | miR-4646-5p |
| t0020891 | 20 | 20 GGGGGAGAAGGGTTCGGGGCG         | miRNA | miR-4516    |
| t0020495 | 23 | 20 GAAGGGTTCGGGGCGGCAGGGGCT      | miRNA | miR-4516    |
| t0020854 | 22 | 20 GAAGGGTTCGGGGCGGCAGGGGT       | miRNA | miR-4516    |
| t0020600 | 22 | 20 GAGAGAAGGGTTCGGGGCGGCAA       | miRNA | miR-4516    |
| t0020602 | 19 | 20 AAACCGTTATCATTACTGA           | miRNA | miR-451     |
| t0020753 | 18 | 20 AAACCGTTACCATTACTT            | miRNA | miR-451     |
| t0020585 | 21 | 20 AAGCCGTTACCATTACTGAGT         | miRNA | miR-451     |
| t0020500 | 21 | 20 AAACGGTTACCATTACTGAGT         | miRNA | miR-451     |
| t0020535 | 20 | 20 TCCCGGGGCTGCGCGAGGCA          | miRNA | miR-4449    |
| t0020609 | 23 | 20 TGAGTGGCAGAGAGCGAGACTTA       | miRNA | miR-423-5p  |
| t0021039 | 25 | 20 TGAGGGGCAGAGAGCGAGACTTAAG     | miRNA | miR-423-5p  |
| t0020972 | 24 | 20 TGAGGGGCAGAGATCGAGACTTTT      | miRNA | miR-423-5p  |
| t0020755 | 24 | 20 TGAGGGGCAGACAGCGAGACTTTT      | miRNA | miR-423-5p  |
| t0020566 | 21 | 20 AGAGGGGCAGAGAGCGAGACT         | miRNA | miR-423-5p  |
| t0020629 | 20 | 20 TAGGGGCAGAGAGCGAGACT          | miRNA | miR-423-5p  |
| t0020633 | 24 | 20 TGAGGGGCAGAGAGCGAGACATTT      | miRNA | miR-423-5p  |
| t0020955 | 20 | 20 TAGTGGCAGAGAGCGAGACT          | miRNA | miR-423-5p  |
| t0020672 | 22 | 20 AGGAACCTTGGAGCTTCGGCAG        | miRNA | miR-3928    |
| t0020835 | 27 | 20 AACTTTGAAGACTGAAGTGGCGAAGGG   | miRNA | miR-3526    |
| t0020907 | 25 | 20 AGGAGATTGGTGGTAGATTGTTTTT     | miRNA | miR-3500    |
| t0020961 | 23 | 20 TCCTCGAACTGTTGTGGCCATTT       | miRNA | miR-3487    |
| t0020498 | 22 | 20 TCAAGAGCAATAACGAAAAATG        | miRNA | miR-335     |
| t0020492 | 20 | 20 TGCACGGCACTGGGGACACG          | miRNA | miR-3177-3p |
| t0020761 | 18 | 20 TATTGCACTCCCGGCCTG            | miRNA | miR-311-3p  |
| t0020766 | 20 | 20 TTTTCAGTCGGATGTTTACA          | miRNA | miR-30e*    |
| t0020796 | 23 | 20 CTAGCACCATCTGAAATCGGTTA       | miRNA | miR-29c     |
| t0020895 | 19 | 20 GCGCGGGTTCGGGGGGCGGG          | miRNA | miR-2981    |
| t0020975 | 21 | 20 TTCAAGTAATTCAGGATAGGC         | miRNA | miR-26a     |
| t0021003 | 22 | 20 CATTGCACTTGTCTCGGTCTGG        | miRNA | miR-25      |

|          |    |                                  |       |             |
|----------|----|----------------------------------|-------|-------------|
| t0021031 | 19 | 20 TAGCTTATCAGACTGATGT           | miRNA | miR-21      |
| t0020702 | 21 | 20 TTTACCACCTTCTCCACCCAG         | miRNA | miR-197     |
| t0020887 | 24 | 20 CAACGGAATCCCAAAAAGCAGCTAA     | miRNA | miR-191     |
| t0020982 | 22 | 20 TGATATGTATGGGTTACTTGGT        | miRNA | miR-190-5p  |
| t0020881 | 23 | 20 TGGAGAGAAAGGCAGTTCCTTAT       | miRNA | miR-185     |
| t0020577 | 19 | 20 TGGAGAGAAAGGCAGTTCT           | miRNA | miR-185     |
| t0020910 | 21 | 20 TATGGAGGTCTCTGTCTGGCT         | miRNA | miR-1843-5p |
| t0020584 | 19 | 20 AGGTAGATAGAACAGGTTT           | miRNA | miR-1839    |
| t0020989 | 21 | 20 TATGGCACTGGTAGAATTCAC         | miRNA | miR-183     |
| t0020434 | 22 | 20 TGAGGGAGTAGATTGAATAGTT        | miRNA | miR-1827    |
| t0020696 | 28 | 20 TTTGGCAATGGTAGAACTCACACGGCCG  | miRNA | miR-182     |
| t0020833 | 19 | 20 GCAGTGAAGGCACTTGTAG           | miRNA | miR-17*     |
| t0020689 | 23 | 20 CTGCAGTGAAGGCACTTGTAGAA       | miRNA | miR-17*     |
| t0020628 | 26 | 20 ACGTAGCAGCACGTAATATTGGAAA     | miRNA | miR-16b     |
| t0020869 | 23 | 20 TAGCAGCACGTAATATTGGAAA        | miRNA | miR-16b     |
| t0020447 | 21 | 20 GCGGGGAGCGGTCGGGCGGCG         | miRNA | miR-1607    |
| t0020588 | 25 | 20 GCGGGGAGCGGTCGGGCGGCGGCG      | miRNA | miR-1607    |
| t0020620 | 20 | 20 TAGCAGCACGTAATATTAG           | miRNA | miR-16      |
| t0020703 | 25 | 20 TAGCAGCACGTAATATTGGCGTAT      | miRNA | miR-16      |
| t0020683 | 22 | 20 TAGCAGCACGTCATGGTTTACA        | miRNA | miR-15b     |
| t0020502 | 26 | 20 AAAGCACATCATGGTTTACATAGCAA    | miRNA | miR-15b     |
| t0020642 | 19 | 20 TCAGCACATAATGGTTTGT           | miRNA | miR-15a     |
| t0020960 | 21 | 20 TAGAAGCACATAATGGTTTGT         | miRNA | miR-15a     |
| t0020956 | 20 | 20 TAGCAGCACATAATGGATTG          | miRNA | miR-15a     |
| t0020734 | 20 | 20 AGTAGCAGCACATAATGGTT          | miRNA | miR-15a     |
| t0020949 | 22 | 20 TACAGTATAGATGATGTAAAAA        | miRNA | miR-144     |
| t0020445 | 18 | 20 ACAGTATAGATGATGTAC            | miRNA | miR-144     |
| t0021037 | 23 | 20 ACAGGGTAGAACCACGGACAGGA       | miRNA | miR-140     |
| t0020614 | 23 | 20 ACCACAGGGTAGAACTACGGACT       | miRNA | miR-140     |
| t0020818 | 21 | 20 ACCCCAGGGTAGAACCACGGA         | miRNA | miR-140     |
| t0020510 | 24 | 20 TACCACAGGGTGAACCACGGACA       | miRNA | miR-140     |
| t0020745 | 22 | 20 CGGATGAGCAAATAAAGTGGTT        | miRNA | miR-1255b   |
| t0020640 | 19 | 20 ACCGCACTGTGGGTA CTG           | miRNA | miR-106b*   |
| t0020918 | 27 | 20 TAAAGTGCTGACAGTGCAGAAAAACC    | miRNA | miR-106b    |
| t0020446 | 21 | 20 TAAAGTGCTGACAGTGCAGAG         | miRNA | miR-106b    |
| t0020748 | 20 | 20 AGCAGCATTGTAAAGGGCTA          | miRNA | miR-103a    |
| t0020874 | 35 | 20 AGCAGCATTGTACAGGGCTATGATACTCT | miRNA | miR-103a    |
| t0021010 | 20 | 20 AGCATCATTGTACAGGGCTA          | miRNA | miR-103a    |
| t0020478 | 19 | 20 AGCAGCATTGTACAGGGAT           | miRNA | miR-103a    |
| t0020948 | 23 | 20 TACAGTACTGTGATAACTGACAT       | miRNA | miR-101c    |
| t0020470 | 20 | 20 TACAGTACTGTGATAAATGA          | miRNA | miR-101     |
| t0020618 | 22 | 20 GTACAGTACTGTTATAACTGAA        | miRNA | miR-101     |
| t0020656 | 21 | 20 TACAGTACTGTGATAACTAAA         | miRNA | miR-101     |
| t0020853 | 20 | 20 TGAGGTAGTAGATTGTATTA          | miRNA | let-7f-5p   |
| t0020572 | 22 | 20 TGAGGTAGTAGATTGTATAGGA        | miRNA | let-7f-5p   |
| t0020928 | 24 | 20 TGAGGTAGTAGATTGTATAGAAGA      | miRNA | let-7f-5p   |
| t0020758 | 20 | 20 TTGAGGTAGTAGATTGTATA          | miRNA | let-7f      |
| t0021023 | 22 | 20 TGAGGTAGTAGAACGTATAGTT        | miRNA | let-7f      |
| t0020457 | 21 | 20 TCTGGTAGTAGATTGTATAGT         | miRNA | let-7f      |
| t0020521 | 20 | 20 GGAGGTAGTAGATTGTATAG          | miRNA | let-7f      |
| t0020783 | 22 | 20 TGGGGTGGTAGATTGTATAGTT        | miRNA | let-7f      |
| t0020797 | 23 | 20 TGAGGTAGGAGATTGTATAGTTG       | miRNA | let-7e      |
| t0020670 | 22 | 20 AGAGGTAGTAGGTTGCCTAGTT        | miRNA | let-7d      |
| t0020646 | 22 | 20 AGAGGTAGTAGGTTGCATGGTT        | miRNA | let-7d      |
| t0020715 | 22 | 20 AGAGGTAGTAGGTTGCATACTT        | miRNA | let-7d      |
| t0020880 | 26 | 20 TGAGGTAGTAGGTTGTGTGGTTAATC    | miRNA | let-7b      |
| t0020816 | 21 | 20 TCAGGTAGTAGGTTGTGTGGT         | miRNA | let-7b      |
| t0020901 | 21 | 20 TGAGGTTGTAGGTTGTATAGT         | miRNA | let-7       |

|          |    |                                 |       |              |
|----------|----|---------------------------------|-------|--------------|
| t0021030 | 19 | 20 GAGGTAGTAGGTTGTATAG          | miRNA | let-7        |
| t0020747 | 20 | 20 TGAGGTAGTAGGTTGTACAG         | miRNA | let-7        |
| t0020899 | 20 | 20 TGAGGTAGTAGGTTTTATAG         | miRNA | let-7        |
| t0020940 | 20 | 19 CTATACAACCTACTACTTTC         | miRNA | miR-98*      |
| t0020990 | 22 | 19 AGGTCGAAGGTTGTAGGCATGT       | miRNA | miR-965-5p   |
| t0021021 | 23 | 19 GGGAGGGCGCGCGGGTCGGGGCG      | miRNA | miR-638      |
| t0020488 | 21 | 19 CTCTTTTCTTTGAGACTCACT        | miRNA | miR-627      |
| t0020529 | 21 | 19 TGTCTTACTCCCTCAGGCATT        | miRNA | miR-550a*    |
| t0020739 | 21 | 19 CAAAATTGATCGTGGTTTTTG        | miRNA | miR-548t     |
| t0020977 | 19 | 19 AAACCCGCAATTACTTTTG          | miRNA | miR-548ac    |
| t0020522 | 21 | 19 ACTGGTGCGGACCAGGGGAAT        | miRNA | miR-5109     |
| t0021004 | 22 | 19 TCTGGGCACAGGCGGATGGAAA       | miRNA | miR-5107     |
| t0020555 | 22 | 19 GGGAGCCAGGAAGTATTGATGT       | miRNA | miR-505*     |
| t0020674 | 26 | 19 TCCTGTACTGAGCTGCCCCGAGCAAG   | miRNA | miR-486-5p   |
| t0021027 | 29 | 19 TCCTGTACTGAGCTGCCCCGAGACGGCC | miRNA | miR-486-5p   |
| t0021032 | 21 | 19 AGAGTCGGCGACGCCGCCAAG        | miRNA | miR-4785     |
| t0021654 | 21 | 19 TCAGGCCAAAGGGATATTTACA       | miRNA | miR-4742-5p  |
| t0021672 | 24 | 19 ATGTAGAGCAGGGAGCAGGAAGCA     | miRNA | miR-4732-5p  |
| t0021276 | 19 | 19 TAAGGGCTGGGTTCGGTCGG         | miRNA | miR-4651     |
| t0021582 | 21 | 19 TGAGGGAGTAGGGTGTATAGT        | miRNA | miR-4510     |
| t0021150 | 23 | 19 AAACCGTTACCATTACTGAGTTC      | miRNA | miR-451      |
| t0021137 | 18 | 19 AAACCGTTACCATTACAA           | miRNA | miR-451      |
| t0021391 | 20 | 19 AAGCCGTTACCATTACTGAG         | miRNA | miR-451      |
| t0021134 | 20 | 19 AAACCGTTACCTTACTGAG          | miRNA | miR-451      |
| t0021103 | 22 | 19 AAAGCGTTACCATTACTGAGTT       | miRNA | miR-451      |
| t0021465 | 22 | 19 ACGTTACCATTACTGAGTAAAC       | miRNA | miR-451      |
| t0021335 | 20 | 19 AAACCGTTGCCATTACTGAG         | miRNA | miR-451      |
| t0021588 | 23 | 19 AAACCGTTACCCTTACTGAGTTT      | miRNA | miR-451      |
| t0021109 | 26 | 19 AAACCGTTACCATTACTGAGTTTAAT   | miRNA | miR-451      |
| t0021171 | 22 | 19 TCCGGGACGGCTGGGAAGGCAT       | miRNA | miR-4497     |
| t0021106 | 19 | 19 CGGCTCCGGGACGGCTGGG          | miRNA | miR-4497     |
| t0021489 | 20 | 19 CGGGCTGGGCGAGGCTGGCT         | miRNA | miR-4486     |
| t0021428 | 20 | 19 ACAGGAGTGGGGGGTGGGAT         | miRNA | miR-4433     |
| t0021115 | 21 | 19 AGCGGCATTGTACAGGGCTAT        | miRNA | miR-4289     |
| t0021216 | 21 | 19 ATGACACGATCACTCCCGTTG        | miRNA | miR-425-5p   |
| t0021222 | 19 | 19 TGAGGGGCAGAGAGAGAGA          | miRNA | miR-423-5p   |
| t0021241 | 20 | 19 TGAGGGGCAGAGAGCGAGAA         | miRNA | miR-423-5p   |
| t0021342 | 23 | 19 TGAGGGGCAGAGAGCGAGGCTTA      | miRNA | miR-423-5p   |
| t0021377 | 19 | 19 GAGGGGCAGAGAGCGAGAC          | miRNA | miR-423-5p   |
| t0021494 | 20 | 19 TGGGCAGAGAGCGAGACTTT         | miRNA | miR-423-5p   |
| t0021633 | 24 | 19 TGAGGGGCAGAGAGCGAGCCTTTT     | miRNA | miR-423-5p   |
| t0021666 | 19 | 19 TGAGGGGCAGAGAGCGTGA          | miRNA | miR-423-5p   |
| t0021232 | 24 | 19 TGAGGGGCAGAGAGCGAGACTATT     | miRNA | miR-423-5p   |
| t0021585 | 21 | 19 TGGAACTCTGATATTGGCAGA        | miRNA | miR-4001g-3p |
| t0021173 | 26 | 19 ACTGGACTTGGAGTCAGAAGGAAATC   | miRNA | miR-378      |
| t0021597 | 21 | 19 ACTGGACTTGGAGTCAGAAGT        | miRNA | miR-378      |
| t0021523 | 22 | 19 GTGGATGATGGAGACTCGGTAT       | miRNA | miR-3691-5p  |
| t0021168 | 22 | 19 GGGTGGATCACGATGCAATTTT       | miRNA | miR-363*     |
| t0021066 | 20 | 19 TTTGAAGACTGAAAGTGGAGA        | miRNA | miR-3526     |
| t0021169 | 20 | 19 TAGAAGACTGCCGCTCGTTT         | miRNA | miR-3494     |
| t0021189 | 19 | 19 TCCCTGTCCTCCAGGAGCT          | miRNA | miR-339b     |
| t0021271 | 23 | 19 AAAAGCTGGGTTGAGAGGGCGCC      | miRNA | miR-320d     |
| t0021435 | 23 | 19 AAAAGATGGGTTGAGAGGGCGAA      | miRNA | miR-320a     |
| t0021480 | 20 | 19 AAAATGGGTTGAGAGGGCGA         | miRNA | miR-320a     |
| t0021520 | 22 | 19 TAGAAGGGGTGAAATTTAAACG       | miRNA | miR-3179     |
| t0021656 | 23 | 19 GGCTGGTCCGAGTGCAGTGGGGT      | miRNA | miR-3135b    |
| t0021069 | 22 | 19 GGCTGGTCCGAGTGCAGTGGGG       | miRNA | miR-3135b    |
| t0021263 | 24 | 19 TGTAACATCCTTGACTGGAAATC      | miRNA | miR-30e      |

|          |    |                                |       |            |
|----------|----|--------------------------------|-------|------------|
| t0021448 | 22 | 19 TAGTACCATCTGAAATCGGTTA      | miRNA | miR-29c    |
| t0021231 | 23 | 19 GGCGGATGTAGCCAAGTGGAGAC     | miRNA | miR-270    |
| t0021245 | 21 | 19 TTCAAGTAATTCAGGATCGGT       | miRNA | miR-26b    |
| t0021161 | 27 | 19 CATTGCACTTGTCTCGGTCTGAAGAAC | miRNA | miR-25     |
| t0021519 | 22 | 19 AATTGCACTTGTCTCGGTCTGA      | miRNA | miR-25     |
| t0021401 | 19 | 19 CTCTAAGGGCTGGGTCGGT         | miRNA | miR-2487   |
| t0021674 | 23 | 19 TTGGGGAAACGGCCGCTGAGTAA     | miRNA | miR-2110   |
| t0021300 | 25 | 19 TAACACTGTCTGGTAACGATGTATC   | miRNA | miR-200a   |
| t0021596 | 23 | 19 CAACGGAATCCCAAAGCAGATG      | miRNA | miR-191    |
| t0021696 | 22 | 19 TGGAGAAAAAGGCAGTTCCTGT      | miRNA | miR-185    |
| t0021373 | 23 | 19 TGGAGAGAAAGGCAATTCCTGAA     | miRNA | miR-185    |
| t0021440 | 23 | 19 TGGAGAGAAGGGCAGTTCCTGAA     | miRNA | miR-185    |
| t0021057 | 19 | 19 TGGAGAGAAAGGCAGTTTT         | miRNA | miR-185    |
| t0021053 | 19 | 19 TGGAGAGAAAGGCAGTTTC         | miRNA | miR-185    |
| t0021274 | 21 | 19 TGGAAAGAAAGGCAGTTCCTG       | miRNA | miR-185    |
| t0021338 | 21 | 19 AGGTAGATAGAACAGGGTTTG       | miRNA | miR-1839   |
| t0021414 | 20 | 19 TGAGGGAGTAGATTGTAGTT        | miRNA | miR-1827   |
| t0021510 | 20 | 19 AAGCAGCACATCATGGTTTA        | miRNA | miR-15b    |
| t0021119 | 21 | 19 TAGCAGCACATCATGGTTTCA       | miRNA | miR-15b    |
| t0021522 | 21 | 19 TAGCAGCATAATGGTTTGC         | miRNA | miR-15a    |
| t0021605 | 20 | 19 TATAGTATAGATGATGTA          | miRNA | miR-144    |
| t0021354 | 19 | 19 CATAAAGTAGAAAGCATTAA        | miRNA | miR-142-5p |
| t0021125 | 21 | 19 TCCATAAAGTAGAAAGCACTA       | miRNA | miR-142-5p |
| t0021258 | 23 | 19 TACCACAGGGTAGAACCACGGAA     | miRNA | miR-140    |
| t0021282 | 23 | 19 TATCACAGGGTAGAACCACGGAA     | miRNA | miR-140    |
| t0021400 | 24 | 19 TACCGCAGGGTAGAACCACGGACA    | miRNA | miR-140    |
| t0021422 | 22 | 19 ACCACAGGGCAGAACCACGGAC      | miRNA | miR-140    |
| t0021628 | 23 | 19 TACTACAGGGTAGAACCACGGAA     | miRNA | miR-140    |
| t0021184 | 24 | 19 TACCACGGGGTAGAACCACGGACA    | miRNA | miR-140    |
| t0021083 | 22 | 19 ACCACGGGGTAGAACCACGGAA      | miRNA | miR-140    |
| t0021657 | 23 | 19 TACCGCAGGGTAGAACCACGGAA     | miRNA | miR-140    |
| t0021688 | 24 | 19 TACCACAGGGTAGAACCCCGGACG    | miRNA | miR-140    |
| t0021054 | 23 | 19 TACCACAGGGTAGAACCACGGGT     | miRNA | miR-140    |
| t0021314 | 22 | 19 GACCACAGGGTAGAACCACGGAA     | miRNA | miR-140    |
| t0021181 | 21 | 19 TCCACAGGGTAGAACCACGGAA      | miRNA | miR-140    |
| t0021542 | 24 | 19 ACCACAGGGTAGAACCACGGATTA    | miRNA | miR-140    |
| t0021065 | 24 | 19 TAACACAGGGTAGAACCACGGACA    | miRNA | miR-140    |
| t0021098 | 19 | 19 CCGCACTGTGGGTACTTGC         | miRNA | miR-106b*  |
| t0021117 | 21 | 19 AAAGTGCTGACAGTGCAGATA       | miRNA | miR-106b   |
| t0021243 | 24 | 19 AGCAGCATTGTACAGGGCTATGTA    | miRNA | miR-103a   |
| t0021246 | 21 | 19 AGCAGCATTGTACCGGGCTAT       | miRNA | miR-103a   |
| t0021280 | 22 | 19 TACAGTACTATGATAACTGAAT      | miRNA | miR-101b   |
| t0021356 | 27 | 19 TACAGTACTGTGATAACTGAACGACGG | miRNA | miR-101    |
| t0021446 | 19 | 19 ATACAGTACTGTGATAACT         | miRNA | miR-101    |
| t0021513 | 22 | 19 GTACAGTACTGGGATAACTGAA      | miRNA | miR-101    |
| t0021525 | 18 | 19 TACAGTACTTTGATAACT          | miRNA | miR-101    |
| t0021560 | 20 | 19 CTGCGCAAGCTACTGCCTTG        | miRNA | let-7i*    |
| t0021561 | 21 | 19 TGAGGTAGTAGATTGTATAAA       | miRNA | let-7f-5p  |
| t0021622 | 24 | 19 AATGAGGTAGTAGATTGTATAGTT    | miRNA | let-7f     |
| t0021658 | 22 | 19 TAGGTAGTAGATTGTATAGTTA      | miRNA | let-7f     |
| t0021374 | 22 | 19 AGTTTGAGGTAGTAGATTGTAT      | miRNA | let-7f     |
| t0021154 | 19 | 19 TGAGTTAGTAGATTGTATA         | miRNA | let-7f     |
| t0021060 | 22 | 19 TGAGGTAGTAGATTCATAGTT       | miRNA | let-7f     |
| t0021254 | 19 | 19 TGAGGTAGTAGATTGTTTA         | miRNA | let-7f     |
| t0021349 | 22 | 19 AGCGGTAGTAGGTTGCATAGTT      | miRNA | let-7d     |
| t0021331 | 22 | 19 AGAGGTAGTAGGTTGCATATTT      | miRNA | let-7d     |
| t0021430 | 26 | 19 AGAGGTAGTAGGTTGCATAGTTAAAA  | miRNA | let-7d     |
| t0021508 | 22 | 19 AGAGGTAGTAGGTCGCATAGTT      | miRNA | let-7d     |

|          |    |                                  |       |              |
|----------|----|----------------------------------|-------|--------------|
| t0021612 | 19 | 19 TGAGGTAGTAGGTTGTGGA           | miRNA | let-7b       |
| t0021205 | 23 | 19 TGAGGAAGTAGGTTGTGGTTA         | miRNA | let-7b       |
| t0021233 | 25 | 19 TGAGGTAGTAGGTTGTGTTGTTATC     | miRNA | let-7b       |
| t0021199 | 20 | 19 TGCGGTAGTAGGTTGTATAG          | miRNA | let-7        |
| t0021212 | 23 | 19 TGAGGTAGTAGGTTGTATATTTG       | miRNA | let-7        |
| t0021351 | 20 | 19 TGAGGTAGTAGGTTATATAG          | miRNA | let-7        |
| t0021445 | 27 | 19 TGAGGTAGTAGGTTGTATAGTTAAAAA   | miRNA | let-7        |
| t0021543 | 19 | 18 TTTGGCACTAGCACATTTT           | miRNA | miR-96       |
| t0021683 | 22 | 18 TATTGCACTCGTCCC GGCCCTCC      | miRNA | miR-92       |
| t0021355 | 22 | 18 TTATGGTTTGCCTGGGACTGAG        | miRNA | miR-584      |
| t0021407 | 20 | 18 CCCCACACCCAAGGCTTGCA          | miRNA | miR-532-3p   |
| t0021629 | 22 | 18 AACAAACATGGTGCACCTCTTT        | miRNA | miR-495      |
| t0021680 | 22 | 18 TCCTGTACTGAGCTGCGCCGAG        | miRNA | miR-486-5p   |
| t0021358 | 29 | 18 TCCTGTACTGAGCTGCCCGAGACGGCTC  | miRNA | miR-486-5p   |
| t0021387 | 22 | 18 TCCTGTACTGAGCTTCCCCGAG        | miRNA | miR-486-5p   |
| t0021573 | 21 | 18 TTGTACTGAGCTGCCTCGAGA         | miRNA | miR-486-5p   |
| t0021244 | 18 | 18 TCCTGTACTGAGCTGCGA            | miRNA | miR-486-5p   |
| t0021339 | 23 | 18 TCCTGTACCGAGCTGCCCGAGT        | miRNA | miR-486-5p   |
| t0021411 | 20 | 18 GTAGGATTGTGTCGGCAGAT          | miRNA | miR-4860     |
| t0021692 | 21 | 18 AGAGTCGGCGACGCCGCCAGT         | miRNA | miR-4785     |
| t0022103 | 23 | 18 GGAGAAGGGTCGGGGCGGCAGGG       | miRNA | miR-4516     |
| t0021710 | 19 | 18 AGAGAAGGGTCGGGGCGGC           | miRNA | miR-4516     |
| t0021744 | 22 | 18 ATACCGTTACCATTACTGAGTT        | miRNA | miR-451      |
| t0021962 | 20 | 18 ACCGTTACCATTACTGAGTT          | miRNA | miR-451      |
| t0021826 | 29 | 18 AAACCGTTACCATTACTGAGTTGCGTCGG | miRNA | miR-451      |
| t0021815 | 23 | 18 AAACCGTTACGATTACTGAGTTT       | miRNA | miR-451      |
| t0021844 | 21 | 18 AGCGTTACCATTACTGAGTTT         | miRNA | miR-451      |
| t0021872 | 23 | 18 AAACCGTTACCATTGCTGAGTTT       | miRNA | miR-451      |
| t0022061 | 23 | 18 AAACCGTTACCATTACCGAGTTT       | miRNA | miR-451      |
| t0022090 | 20 | 18 AAACCGATAACCATTACTGAG         | miRNA | miR-451      |
| t0022324 | 21 | 18 AAACCGTTACCATTACTGACT         | miRNA | miR-451      |
| t0021841 | 22 | 18 TTCGGGGTCTGGGCGCGGCGAG        | miRNA | miR-4508     |
| t0021966 | 23 | 18 TTCGGGGTCTGGGCGCGGCGAAT       | miRNA | miR-4508     |
| t0021921 | 19 | 18 TCCGGGACGGCTGGGAAGG           | miRNA | miR-4497     |
| t0022175 | 22 | 18 TCGTATCCGAGTCACGGCACCA        | miRNA | miR-4454     |
| t0021801 | 20 | 18 GGCAGCATTGTACAGGGCTA          | miRNA | miR-4289     |
| t0021870 | 22 | 18 TGACGGGCAGAGAGCGAGACTT        | miRNA | miR-423-5p   |
| t0021879 | 21 | 18 GGAGGGGCAGAGAGCGAGACT         | miRNA | miR-423-5p   |
| t0021911 | 23 | 18 TGAGGGGCAGAGAGCGAGAATTA       | miRNA | miR-423-5p   |
| t0022023 | 23 | 18 TGATTGGCAGAGAGCGAGACTTT       | miRNA | miR-423-5p   |
| t0022114 | 25 | 18 TGAGGGGCAGAGAGCGAGACTTAAT     | miRNA | miR-423-5p   |
| t0022124 | 20 | 18 TGGGGCAGAGAGCGAGACTT          | miRNA | miR-423-5p   |
| t0022150 | 21 | 18 TGAGGGGCCGAGAGCGAGACT         | miRNA | miR-423-5p   |
| t0022314 | 22 | 18 TGAGGGGCAGAGAGCGAGACAT        | miRNA | miR-423-5p   |
| t0022315 | 23 | 18 TGAGGGGCAGAGAGCGGACTTA        | miRNA | miR-423-5p   |
| t0022319 | 21 | 18 TGGAActCTGATATTGGCAGG         | miRNA | miR-4001g-3p |
| t0021727 | 22 | 18 TGTGTGGATCCTGGAGGAGGCA        | miRNA | miR-3911     |
| t0021753 | 25 | 18 ACTGGACTTGGAGTTAGAAGGAATC     | miRNA | miR-378c     |
| t0022208 | 22 | 18 CTGGACTTGGAGTCAGAAGGCG        | miRNA | miR-378      |
| t0021852 | 21 | 18 ACTGGACTTGGATTCAGAAGG         | miRNA | miR-378      |
| t0021916 | 18 | 18 ATATAATACAACCTGCTA            | miRNA | miR-374      |
| t0021927 | 22 | 18 GAGGGACTTTCAGGGGCAGCTG        | miRNA | miR-365-5p   |
| t0021985 | 21 | 18 CCGGGGGTGGGGTCGGCGGAT         | miRNA | miR-3621     |
| t0022011 | 26 | 18 AAGTGAATCCAGGACGCGCGTGTTT     | miRNA | miR-3503     |
| t0022027 | 20 | 18 CAGAAGACTGCCGCTCATTT          | miRNA | miR-3494     |
| t0022068 | 20 | 18 TCACACAGAAATCGCACCCG          | miRNA | miR-342-3p   |
| t0022089 | 22 | 18 TTCACACAGAAATCGCACCCGT        | miRNA | miR-342-3p   |
| t0022298 | 25 | 18 TCTCACACAGAAATCGCACCCGTCG     | miRNA | miR-342-3p   |

|          |    |                                  |       |             |
|----------|----|----------------------------------|-------|-------------|
| t0022328 | 23 | 18 AAAAGCTGGGTTAAGAGGGCGTA       | miRNA | miR-320d    |
| t0022228 | 23 | 18 AAAAGCTGGGTTGAGAGGGCTAT       | miRNA | miR-320d    |
| t0022308 | 22 | 18 AAAAGCTGGGTTGAGAGGACGA        | miRNA | miR-320d    |
| t0022188 | 22 | 18 AAAAGCTGGGTTGAGGGGGCGT        | miRNA | miR-320d    |
| t0022318 | 22 | 18 AAAAGCTGGGTTGAGCGGGCGT        | miRNA | miR-320d    |
| t0021957 | 24 | 18 GGCTGGTCCGAGTGCAGTGGGGTT      | miRNA | miR-3135b   |
| t0022143 | 23 | 18 CAGTGCAATAGTATTGTCAAAGC       | miRNA | miR-301b-3p |
| t0022111 | 27 | 18 GCGCGGGTTCGGGGGGCGGGGCGGACTG  | miRNA | miR-2981    |
| t0022222 | 23 | 18 GCGGGTCGGGGGGCGGGGCGGAC       | miRNA | miR-2981    |
| t0021834 | 21 | 18 CATTGCACTTGTCTCGGTATG         | miRNA | miR-25      |
| t0021762 | 21 | 18 CATTGCACTTGTTCGGTCTG          | miRNA | miR-25      |
| t0021919 | 25 | 18 CATTGCACTTGTCTCGGTCTGACGG     | miRNA | miR-25      |
| t0022339 | 26 | 18 GGCTCTAAGGGCTGGGTTCGGTTCGGGC  | miRNA | miR-2487    |
| t0021881 | 24 | 18 ATCACATTGCCAGGGATTTCCAAT      | miRNA | miR-23a     |
| t0021891 | 24 | 18 TAGCTTATCAGACTTATGTTGATC      | miRNA | miR-21      |
| t0022186 | 22 | 18 CAACGGAATCCATAAGCAGCT         | miRNA | miR-191     |
| t0022325 | 21 | 18 TGGAGAGAAACGCAGTTCCTG         | miRNA | miR-185     |
| t0022327 | 21 | 18 TGGAGAGAAAGGCCGTTTCCTG        | miRNA | miR-185     |
| t0022199 | 24 | 18 TGGAGAGAAAGGCAGTTCCTGATT      | miRNA | miR-185     |
| t0022297 | 21 | 18 TGAAGAGAAAGGCAGTTCCTG         | miRNA | miR-185     |
| t0021929 | 21 | 18 TGGAGAGAAAGGCAGATCCTG         | miRNA | miR-185     |
| t0021991 | 22 | 18 AAGGAAGATAGAACAGGTCTTG        | miRNA | miR-1839    |
| t0021998 | 20 | 18 AGGTAGATAGAACAGGTCTT          | miRNA | miR-1839    |
| t0022080 | 24 | 18 AACATTCAACCTGTTCGGTGAGATC     | miRNA | miR-181c    |
| t0022329 | 24 | 18 AACATTCATTGCTGTTCGGTGGGTT     | miRNA | miR-181b    |
| t0022288 | 23 | 18 TCAAAGTGCTTACAGTGCAGGTA       | miRNA | miR-17      |
| t0021853 | 18 | 18 AGCAGCACGTAAATATTG            | miRNA | miR-16      |
| t0021858 | 23 | 18 ATAGCAGCACGTAAATATTGGTG       | miRNA | miR-16      |
| t0021923 | 19 | 18 TAGAAGCACGTAAATATTG           | miRNA | miR-16      |
| t0021740 | 18 | 18 TAGCAGCACATCATGCTA            | miRNA | miR-15b     |
| t0021802 | 19 | 18 CAGCAGCACATCATGGTTT           | miRNA | miR-15b     |
| t0021907 | 22 | 18 TAGCAGCACATCATGCTTTACA        | miRNA | miR-15b     |
| t0022079 | 20 | 18 TAGCAGCACACCATGGTTTA          | miRNA | miR-15b     |
| t0022236 | 24 | 18 TAGCAGCACATAATGGTTTGAAAA      | miRNA | miR-15a     |
| t0021720 | 23 | 18 TCTCCAATTCTGTACCAGTGA         | miRNA | miR-150     |
| t0022240 | 20 | 18 TCAGTGCATTACAGAACTTT          | miRNA | miR-148     |
| t0021845 | 21 | 18 ACAGTATAGATGATGTACTTT         | miRNA | miR-144     |
| t0021920 | 21 | 18 CATAAAGTAGAAAGCACTATT         | miRNA | miR-142-5p  |
| t0021996 | 20 | 18 CCCATAAAGTAGAAAGCTCT          | miRNA | miR-142     |
| t0021784 | 19 | 18 CCATAAAGTAGAAAGCACT           | miRNA | miR-142     |
| t0022051 | 18 | 18 CCCATAAAGTAGAATGCA            | miRNA | miR-142     |
| t0022230 | 21 | 18 ACCACTGGGTAGAACCACGGA         | miRNA | miR-140     |
| t0021859 | 24 | 18 TACCACAAGGTAGAACCACGGACA      | miRNA | miR-140     |
| t0022084 | 23 | 18 ACCACAGGGTAGAACCACGGACC       | miRNA | miR-140     |
| t0022118 | 23 | 18 TACCACAGGGTAGAACCACGAAC       | miRNA | miR-140     |
| t0022131 | 24 | 18 TACCACAGGGTAGAACCACGGACA      | miRNA | miR-140     |
| t0022293 | 23 | 18 ACCACAGGGGAGAACCACGGACA       | miRNA | miR-140     |
| t0021854 | 23 | 18 CACAGGGTAGAACCACGGAAAAC       | miRNA | miR-140     |
| t0022005 | 23 | 18 TACCACAGGGTCGAACCACGGAC       | miRNA | miR-140     |
| t0021955 | 22 | 18 TACCACAGGGTCGAACCACGGA        | miRNA | miR-140     |
| t0022252 | 20 | 18 ACCACAGGGAAGAACCACGG          | miRNA | miR-140     |
| t0021771 | 23 | 18 TGGAATGTAAAGAAGTATGGAGA       | miRNA | miR-1-3p    |
| t0021888 | 21 | 18 CAGTGTAATGTTAAAAGGGCA         | miRNA | miR-130a    |
| t0022086 | 20 | 18 TGCTGGATCAGTGGTTTCGAG         | miRNA | miR-1287    |
| t0021746 | 20 | 18 GTGAGGACTCGGGAGGGGGA          | miRNA | miR-1224    |
| t0021772 | 29 | 18 TACCGCACTGTGGGTACTTGCTAAAAAGC | miRNA | miR-106b*   |
| t0021774 | 21 | 18 TAAAGTGCTGACAGGGCAGAT         | miRNA | miR-106b    |
| t0021848 | 21 | 18 AAAGTGCTGACAGTGCAGATT         | miRNA | miR-106b    |

|          |    |                                  |       |             |
|----------|----|----------------------------------|-------|-------------|
| t0021898 | 23 | 18 AGCAGCATTGTACGGGGCTATGA       | miRNA | miR-103a    |
| t0021983 | 22 | 18 AGCAGCACTGTACAGGGCTATG        | miRNA | miR-103a    |
| t0022173 | 23 | 18 AGCAGCATCGTACAGGGCTATGA       | miRNA | miR-103a    |
| t0022224 | 20 | 18 AGCAGCATTGTACAGCGCTA          | miRNA | miR-103a    |
| t0022269 | 22 | 18 AGCGGCATTGTACAGGGCTATG        | miRNA | miR-103a    |
| t0022321 | 21 | 18 AGCAGCATTGTCCAGGGCTAT         | miRNA | miR-103a    |
| t0022212 | 23 | 18 TACAGTACTGTGATAACTGATTA       | miRNA | miR-101c    |
| t0021819 | 21 | 18 TGCAGTACTGTGATAACTGAA         | miRNA | miR-101     |
| t0022305 | 23 | 18 TACAGTACTGTGATAACTGAATC       | miRNA | miR-101     |
| t0022071 | 21 | 18 TATAGTACTGTGATAACTGAA         | miRNA | miR-101     |
| t0021795 | 19 | 18 TGAGGTAGTAGTTTGTCT            | miRNA | let-7i      |
| t0022174 | 24 | 18 ATGAGGTAGTAGATTGTATAGTTA      | miRNA | let-7f      |
| t0022312 | 19 | 18 TGAGGCAGTAGATTGTATA           | miRNA | let-7f      |
| t0021707 | 21 | 18 TGAGGTAGCATATTGTATAGT         | miRNA | let-7f      |
| t0021767 | 23 | 18 TGAGGCAGTAGATTGTATAGTTA       | miRNA | let-7f      |
| t0021889 | 19 | 18 TCTGGTAGTAGATTGTATA           | miRNA | let-7f      |
| t0022018 | 21 | 18 CTATACGACCTGCTGCCTTTC         | miRNA | let-7d*     |
| t0022047 | 21 | 18 AGAGGTAGTAGTTGCACAGT          | miRNA | let-7d      |
| t0022049 | 20 | 18 AGAGGCAGTAGTTGCATAG           | miRNA | let-7d      |
| t0022069 | 27 | 18 TGAGGTAGTAGTTGTGTGGTTGAAAC    | miRNA | let-7b      |
| t0021716 | 22 | 18 TGAGGAAGTAGTTGTGTGGTA         | miRNA | let-7b      |
| t0022161 | 27 | 18 TGAGGTAGTAGTTGTGTGGTTAAATC    | miRNA | let-7b      |
| t0022257 | 22 | 18 TGAGGAGTAGTTGTATAGTT          | miRNA | let-7       |
| t0022221 | 19 | 18 TGAGGTAGTACGTTGTATA           | miRNA | let-7       |
| t0021760 | 20 | 18 TAAGGTAGTAGTTGTATAG           | miRNA | let-7       |
| t0021867 | 21 | 17 CTATAACAATTACTACTTTCA         | miRNA | miR-98*     |
| t0021894 | 23 | 17 CAAAGTGCTGTCGTGCCGGTAG        | miRNA | miR-93      |
| t0022012 | 22 | 17 TATTGCACTCGTCCCGGCCATT        | miRNA | miR-92      |
| t0022044 | 19 | 17 TTGCACTCGTCCCGGCCTC           | miRNA | miR-92      |
| t0021839 | 21 | 17 TTAATATCGGACAACCATTGT         | miRNA | miR-889     |
| t0021909 | 19 | 17 AATGGCGCCACTAGGTGTG           | miRNA | miR-652     |
| t0022122 | 25 | 17 AGGGCGCGCGGGTTCGGGCGCCGGA     | miRNA | miR-638     |
| t0021787 | 20 | 17 CAAAAGTGCAGTTACTTTT           | miRNA | miR-548o    |
| t0022062 | 18 | 17 AAAAGTATTTGCGGGTTT            | miRNA | miR-548l    |
| t0022276 | 21 | 17 TAGCAGCGGGAACAGTTCAAG         | miRNA | miR-503     |
| t0021725 | 20 | 17 ATGCACCTGGGCAAGGATTC          | miRNA | miR-500a*   |
| t0021901 | 21 | 17 TCCTGTCTGAGCTGCCCCGA          | miRNA | miR-486-5p  |
| t0022119 | 24 | 17 TCTTGTACTGAGCTGCCCCGAGTT      | miRNA | miR-486-5p  |
| t0022595 | 22 | 17 TCCTGTACTGAGCTGCCCCGAA        | miRNA | miR-486-5p  |
| t0022966 | 21 | 17 TGTAGAATTGTGTCGGCAGAT         | miRNA | miR-4860    |
| t0022789 | 24 | 17 TGTAGAATTGTGTCGGCAGATTTT      | miRNA | miR-4860    |
| t0022985 | 20 | 17 TCAGGCTCAGTCCCCTCCCG          | miRNA | miR-484     |
| t0022558 | 20 | 17 CTCGGGCGGAGGTGGTTGAG          | miRNA | miR-4750    |
| t0022517 | 27 | 17 TGTAGAGCAGGGAGCAGGAAGCTGAGA   | miRNA | miR-4732-5p |
| t0022474 | 24 | 17 ACTGGGGAGCAGAAGGAGAACAAG      | miRNA | miR-4667-5p |
| t0022722 | 20 | 17 GAGAAGGGTCGGGGCGGCAG          | miRNA | miR-4516    |
| t0022539 | 22 | 17 TGAGGTAGTAGGGTGTGTGGTA        | miRNA | miR-4510    |
| t0022362 | 22 | 17 TGAGGGAGTAGGGTGTATAGTT        | miRNA | miR-4510    |
| t0022645 | 23 | 17 GAACCGTTACCATTACTGAGTTT       | miRNA | miR-451     |
| t0022523 | 21 | 17 AAACCGTTACCATTACTTAGA         | miRNA | miR-451     |
| t0022764 | 20 | 17 AAACCGTTACCATTACTCAG          | miRNA | miR-451     |
| t0022967 | 21 | 17 AAACCGTTACCAATACTGAGT         | miRNA | miR-451     |
| t0022936 | 29 | 17 AAACCGTTACCATTACTGAGTTCGTCGAT | miRNA | miR-451     |
| t0022989 | 20 | 17 AGACCGTTACCATTACTGAG          | miRNA | miR-451     |
| t0022653 | 20 | 17 GAACCGTTACCATTACTGAG          | miRNA | miR-451     |
| t0022567 | 19 | 17 TTCGGGGTCTGGGCGCGGA           | miRNA | miR-4508    |
| t0022457 | 23 | 17 CTCGAATCCGAGTCACGGCACCA       | miRNA | miR-4454    |
| t0022795 | 18 | 17 GCATTGTACAGGGCTATT            | miRNA | miR-4289    |

|          |    |                                 |       |              |
|----------|----|---------------------------------|-------|--------------|
| t0022755 | 22 | 17 AATTGCACGGTATCCATCTTTT       | miRNA | miR-363      |
| t0022414 | 21 | 17 CCGGGGGTGGGGTTCGGCGGGG       | miRNA | miR-3621     |
| t0022441 | 23 | 17 TGAAGACTTAAGTGGAGAAGGGT      | miRNA | miR-3526     |
| t0022361 | 21 | 17 TTTGAAGACTGAAGTGGAGAA        | miRNA | miR-3526     |
| t0022463 | 28 | 17 AACTTTGAAGACTGAAGTGGCGAAGGGT | miRNA | miR-3526     |
| t0022611 | 30 | 17 ACTTTGAAGACTGAAGTGGAGAAGGGTT | miRNA | miR-3526     |
| t0022684 | 18 | 17 TGAGTAGTAGGTTGTATA           | miRNA | miR-352      |
| t0022724 | 22 | 17 GCAAAGCACACGGCCTGCAGAG       | miRNA | miR-330-3p   |
| t0022757 | 22 | 17 AAAAGATGGGTTGAGAGGGCGT       | miRNA | miR-320d     |
| t0022799 | 23 | 17 GAAAAGCTGGGTTGAGAGGGCAG      | miRNA | miR-320d     |
| t0022352 | 24 | 17 AAAAGCTGGGTTGAGAGGGTAGAA     | miRNA | miR-320d     |
| t0022894 | 20 | 17 AAAGCTGCGTTGAGAGGGCA         | miRNA | miR-320b     |
| t0022482 | 23 | 17 AAAAGCTGGGTTGAGCGGGCGAA      | miRNA | miR-320a     |
| t0022716 | 21 | 17 CTGGGAGGTGGATGTTTACTT        | miRNA | miR-30b*     |
| t0022569 | 26 | 17 TGTA AACATCCCCGACTGGTAGCATC  | miRNA | miR-30a-5p   |
| t0022430 | 24 | 17 GCGCGGGTTCGGGGGGCGGGGCGGA    | miRNA | miR-2981     |
| t0022509 | 22 | 17 TTCACAGTGGCTAAGTTCGCA        | miRNA | miR-27a-3p   |
| t0022707 | 21 | 17 TTCAAGTAATTCAGTATAGGT        | miRNA | miR-26b      |
| t0022970 | 22 | 17 AGGCGGAGACTTGGGCAATTTT       | miRNA | miR-25*      |
| t0022485 | 22 | 17 CATTGCACTTGTCTCGGACTGA       | miRNA | miR-25       |
| t0022371 | 20 | 17 GACTGGGGCGGAACATCTGT         | miRNA | miR-219-2-3p |
| t0022425 | 25 | 17 CGAATGTAAAGAAGTATGTATATC     | miRNA | miR-1a       |
| t0022594 | 25 | 17 TGTGCAAATCTATGCAAAACTGAAA    | miRNA | miR-19a      |
| t0022712 | 21 | 17 TAGGTAGTTTCTGTTGTTGG         | miRNA | miR-196b     |
| t0022964 | 24 | 17 TGACCTATGAATTGACAGCCAAAA     | miRNA | miR-192      |
| t0022628 | 21 | 17 AACGGAATCCCAAAAGCAGCA        | miRNA | miR-191      |
| t0022765 | 21 | 17 TACTGCCCTAAATGCCCTTA         | miRNA | miR-18b*     |
| t0022918 | 23 | 17 TGGAGAGAAAGGCAGGTCCTGAA      | miRNA | miR-185      |
| t0022771 | 22 | 17 TGGAGAGAAAGGCGGTTCTGT        | miRNA | miR-185      |
| t0022802 | 19 | 17 TGGAGAGAAAGGCAGTTAA          | miRNA | miR-185      |
| t0022560 | 23 | 17 TGGAGAGCAAGGCAGTTCCTGAA      | miRNA | miR-185      |
| t0022586 | 21 | 17 AGGGAGATAGAACAGGTCTTG        | miRNA | miR-1839     |
| t0022429 | 21 | 17 AGGTAGATACAACAGGTCTTG        | miRNA | miR-1839     |
| t0022453 | 19 | 17 AAGCGGCGATGGCGGAGCA          | miRNA | miR-1636     |
| t0022627 | 23 | 17 TAGAAGCACGTA AATATTGGCGA     | miRNA | miR-16       |
| t0022719 | 20 | 17 TAACAGCACGTA AATATTGG        | miRNA | miR-16       |
| t0022743 | 18 | 17 TAGCAGCACGTA AATTTG          | miRNA | miR-16       |
| t0022897 | 22 | 17 TAGCAGCACATCATTGTTTACA       | miRNA | miR-15b      |
| t0022381 | 20 | 17 TAGCAGCACATAGTGGTTTG         | miRNA | miR-15a      |
| t0022865 | 20 | 17 TAGCAGCACATAACGGTTTG         | miRNA | miR-15a      |
| t0022436 | 21 | 17 CTCCCAACCCTTGTACCAGTG        | miRNA | miR-150      |
| t0022636 | 23 | 17 TGAGATGAAGCATTGTAGCTATC      | miRNA | miR-143      |
| t0022751 | 19 | 17 CATAAACTAGAAAGCACTA          | miRNA | miR-142-5p   |
| t0022774 | 23 | 17 TACCACGGGTAGAACACGGAA        | miRNA | miR-140      |
| t0022377 | 24 | 17 TACCACAGGGTAAAACACGGACA      | miRNA | miR-140      |
| t0022805 | 23 | 17 TACCACAGGGTAGGACCACGGAC      | miRNA | miR-140      |
| t0022917 | 24 | 17 TACCACAGGGCAGAACCACGGACA     | miRNA | miR-140      |
| t0022493 | 23 | 17 TACCACAGGGTAGTACCACGGAT      | miRNA | miR-140      |
| t0022564 | 24 | 17 TATCACAGGGTAGAACACGGAAA      | miRNA | miR-140      |
| t0022990 | 23 | 17 TACCACAGGGAAGAACCACGGAA      | miRNA | miR-140      |
| t0022566 | 22 | 17 TACCACAGGGTAGAACACGGAA       | miRNA | miR-140      |
| t0022610 | 21 | 17 ACCACAGGGTAGAACCTCGGA        | miRNA | miR-140      |
| t0022652 | 26 | 17 TACCACAGGGTAGAACACGGACAAT    | miRNA | miR-140      |
| t0022957 | 23 | 17 TACCACGGGTAGAACACGGAC        | miRNA | miR-140      |
| t0022959 | 23 | 17 GCAGTGAATGTTAAAGGGCAT        | miRNA | miR-130a     |
| t0022909 | 21 | 17 TCTGGGCAACAAAGTGAGACC        | miRNA | miR-1285     |
| t0022458 | 25 | 17 GGCGACAAAACGAGACCCTGTCAA     | miRNA | miR-1273c    |
| t0022470 | 22 | 17 ATCCCACCGCTGCCACCATAAA       | miRNA | miR-1260b    |



|          |    |                               |       |             |
|----------|----|-------------------------------|-------|-------------|
| t0022518 | 25 | 17 TCGTACCGTGAGTACTAATGCGATC  | miRNA | miR-126     |
| t0022532 | 25 | 17 TACCCTGTATATCCGAATTTGTATC  | miRNA | miR-10a     |
| t0022601 | 23 | 17 ATAAAGTGCTGACAGTGCAGAAA    | miRNA | miR-106b    |
| t0022671 | 21 | 17 AGCAGCATTGTGCAGGGCTAT      | miRNA | miR-103a    |
| t0022768 | 18 | 17 AGCAGCATTGTACAGGGT         | miRNA | miR-103a    |
| t0022835 | 22 | 17 AGGAGCATTGTACAGGGCTATG     | miRNA | miR-103a    |
| t0022847 | 21 | 17 AGCAGCATTGTACAGAGCTAT      | miRNA | miR-103a    |
| t0022849 | 23 | 17 AGCGGCATTGTACAGGGCTATGA    | miRNA | miR-103a    |
| t0022850 | 26 | 17 GTACAGTACTGTGATAACTGAGGCAT | miRNA | miR-101c    |
| t0022999 | 22 | 17 GTACAGCACTGTGATAACTGAA     | miRNA | miR-101     |
| t0022906 | 21 | 17 TACAGTACCGTGATAACTGAA      | miRNA | miR-101     |
| t0022396 | 19 | 17 TGTAGTAGTTTGTGCTGTT        | miRNA | let-7i      |
| t0022478 | 22 | 17 TGGGGTAGTAGTTTGTGCTGTT     | miRNA | let-7i      |
| t0022409 | 22 | 17 TGAGGTAGTAGTCTGTACAGTT     | miRNA | let-7g      |
| t0022630 | 22 | 17 TGAGGTAGTAGTTTGGACAGTT     | miRNA | let-7g      |
| t0022700 | 22 | 17 TGAGATAGTAGTTTGTACAGTT     | miRNA | let-7g      |
| t0022496 | 25 | 17 TGAGGTAGTAGATTGTATAGAGATT  | miRNA | let-7f-5p   |
| t0022622 | 24 | 17 TTGAGGTAGTAGATTGTATAGTTA   | miRNA | let-7f      |
| t0022677 | 20 | 17 TGAGGTAGTAGATTGTAGAT       | miRNA | let-7f      |
| t0022883 | 20 | 17 AGAGGTAGTAGGTTGAATAG       | miRNA | let-7d      |
| t0022904 | 22 | 17 AGAGGTAGTAGGTTGCATAGAT     | miRNA | let-7d      |
| t0022434 | 22 | 17 AGAGGTAGTAGTTTGCATAGTT     | miRNA | let-7d      |
| t0022624 | 25 | 17 AGAGGTAGTAGGTTGCATAGTTATG  | miRNA | let-7d      |
| t0022925 | 26 | 17 TGAGGTAGTAGGTTGTATGGTTATCT | miRNA | let-7c      |
| t0022418 | 20 | 17 TGGGGTAGTAGGTTGTGTGG       | miRNA | let-7b      |
| t0022698 | 24 | 17 TGAGGTAGTAGGTTGTGTAGTTTT   | miRNA | let-7b      |
| t0022620 | 18 | 17 TGAGGTACTAGGTTGTGT         | miRNA | let-7b      |
| t0022866 | 23 | 17 TGAGGTAGTAGGTTGTGGGGTTT    | miRNA | let-7b      |
| t0022869 | 20 | 17 CGAGGTAGTAGGTTGTGTGG       | miRNA | let-7b      |
| t0022579 | 22 | 17 TGAGGTAGTAGGTTGTGCAGTT     | miRNA | let-7b      |
| t0022562 | 24 | 17 TGAGGTAGTAGGTTGTGGGGTTAA   | miRNA | let-7b      |
| t0022984 | 24 | 17 TGAGGTAGTAGGTTGTATAGTAAT   | miRNA | let-7-5p    |
| t0022634 | 19 | 17 TGAGGTAGTAGGGTGTATA        | miRNA | let-7       |
| t0022738 | 21 | 17 GTGAGGTAGTAGGTTGTATAG      | miRNA | let-7       |
| t0022873 | 20 | 17 TGAGGTAGTCGGTTGTATAG       | miRNA | let-7       |
| t0022902 | 21 | 17 CTGAGGTAGTAGGTTGTATAG      | miRNA | let-7       |
| t0022411 | 20 | 17 TGAGGTAGTAGGTTGTATAC       | miRNA | let-7       |
| t0022370 | 22 | 16 TATTGTA CTGTTCCGGCCTGT     | miRNA | miR-92d     |
| t0022455 | 22 | 16 TATTGCACTTGTCCCGGCTCGT     | miRNA | miR-92a     |
| t0022520 | 23 | 16 TATTGCACTTGTCCCGTCTGTA     | miRNA | miR-92a     |
| t0022568 | 21 | 16 TGAGTGTGTGTGTGTGAGTGT      | miRNA | miR-574-5p  |
| t0022872 | 22 | 16 CAAAAGTAATTGCGGTCTTTGG     | miRNA | miR-548j    |
| t0022882 | 22 | 16 AAAGTGATTGTGGTTTTTGTCA     | miRNA | miR-548d-5p |
| t0022891 | 25 | 16 TCTGGGCACAGGCGGATGGACAGGA  | miRNA | miR-5107    |
| t0022621 | 20 | 16 GGGAGCCAGGAAGTATTGAT       | miRNA | miR-505*    |
| t0022582 | 23 | 16 TCCTGTA CTGAGCTGCCACGAGA   | miRNA | miR-486-5p  |
| t0022642 | 21 | 16 TCCTGTA CTGAGCTGCCCTA      | miRNA | miR-486-5p  |
| t0022715 | 21 | 16 TCCTGTA CTGAGCTGGCCGA      | miRNA | miR-486-5p  |
| t0022787 | 21 | 16 TCCTGTA CTAGCTGCCCGA       | miRNA | miR-486-5p  |
| t0022794 | 23 | 16 GCTGGGTCGGTCGGGCTGGGGCG    | miRNA | miR-4651    |
| t0023019 | 20 | 16 AAACCGTTAGCATTACTGAG       | miRNA | miR-451     |
| t0023298 | 22 | 16 AAACCTTACCATTACTTAGTT      | miRNA | miR-451     |
| t0023399 | 25 | 16 AAACCGTTACCATTACTGGGTTTAG  | miRNA | miR-451     |
| t0023502 | 24 | 16 CAGAAACCGTTACCATTACTGAGT   | miRNA | miR-451     |
| t0023035 | 23 | 16 CGTTACCATTACTGAGTAAACAA    | miRNA | miR-451     |
| t0023303 | 22 | 16 AAACCTTACCATTACTGAGTTA     | miRNA | miR-451     |
| t0023055 | 23 | 16 CAGCAGCAATTCATGTTTTGAAA    | miRNA | miR-424     |
| t0023170 | 25 | 16 TGAGGGGCAGAGAGCGAGACTTTTA  | miRNA | miR-423-5p  |

|          |    |                                  |       |             |
|----------|----|----------------------------------|-------|-------------|
| t0023063 | 22 | 16 TGCGGGGCAGAGAGCGAGACTT        | miRNA | miR-423-5p  |
| t0023205 | 24 | 16 TGAGGGGCAGAGAGCGAGATTTTT      | miRNA | miR-423-5p  |
| t0023386 | 22 | 16 TAGGGGCAGAGAGCGAGACTTA        | miRNA | miR-423-5p  |
| t0023649 | 22 | 16 GAGGGGCAGAGAGCGAGACTTA        | miRNA | miR-423-5p  |
| t0023333 | 23 | 16 TGAGGGGAAGAGAGCGAGACTTA       | miRNA | miR-423-5p  |
| t0023142 | 24 | 16 TGAGCGGCAGAGAGCGAGACTTTT      | miRNA | miR-423-5p  |
| t0023150 | 19 | 16 CGGCGGCGGCGGGGGTGTG           | miRNA | miR-3885-5p |
| t0023323 | 19 | 16 GCGGCGGCGGCGGGGGCG            | miRNA | miR-3885-5p |
| t0023443 | 25 | 16 GAGACTTACGTTGCGTCAAGAGTTA     | miRNA | miR-3850-3p |
| t0023498 | 24 | 16 ACTGGACTTGGAGTCAGAAGGCAT      | miRNA | miR-378     |
| t0023655 | 25 | 16 TTGAAGACTGAAAGTGGAGAAGGTTT    | miRNA | miR-3526    |
| t0023565 | 23 | 16 TGAGGACTGAAAGTGGGGAAAGGT      | miRNA | miR-3526    |
| t0023050 | 21 | 16 TCTGTATCCGTGCTGAGATTT         | miRNA | miR-3499    |
| t0023198 | 23 | 16 TCTCACACAGAAATAGCACCCGT       | miRNA | miR-342-3p  |
| t0023338 | 18 | 16 TCTCACACAGAAATCGCG            | miRNA | miR-342-3p  |
| t0023416 | 22 | 16 AAAAGCTGGGTTGAAAGGGCGT        | miRNA | miR-320d    |
| t0023473 | 20 | 16 AAAGCTGGGTTGAGAGGGAG          | miRNA | miR-320d    |
| t0023537 | 22 | 16 GAAAAGCTGGGTTGAGAGGGCA        | miRNA | miR-320b    |
| t0023630 | 23 | 16 AAAGCTGGGTTGAGAGGGCGAAA       | miRNA | miR-320a    |
| t0023083 | 22 | 16 TTCAAGTAATTCAGGATAGGGT        | miRNA | miR-26b     |
| t0023596 | 24 | 16 TTCAAGTAATTCAGGATAGGTAA       | miRNA | miR-26b     |
| t0023185 | 18 | 16 TTCAAGTAATCCAGGATA            | miRNA | miR-26a     |
| t0023540 | 35 | 16 CATTGCACTTGTCTCGGTCTGCAGGAATT | miRNA | miR-25      |
| t0023251 | 22 | 16 CATTGCCCTTGTCTCGGTCTGA        | miRNA | miR-25      |
| t0023334 | 23 | 16 TGGCTCAGTTCAGCAGGAACCGT       | miRNA | miR-24b     |
| t0023301 | 19 | 16 ATCATATTGCCAGGGATTT           | miRNA | miR-23a     |
| t0023023 | 23 | 16 GTCAGTTTGTCAAATACCCCAAT       | miRNA | miR-223     |
| t0023066 | 22 | 16 CTGACCTATGAATTGACAGCAA        | miRNA | miR-192     |
| t0023207 | 24 | 16 TGACCTATGAATTGACAGCCAGAT      | miRNA | miR-192     |
| t0023420 | 23 | 16 TCTGACCTATGAATTGACAGCCT       | miRNA | miR-192     |
| t0023054 | 20 | 16 TAACGGAATCCCAAAAGCAG          | miRNA | miR-191     |
| t0023192 | 22 | 16 AAAGGAATCCCAAAAGCAGCTG        | miRNA | miR-191     |
| t0023106 | 23 | 16 CAACGGAATCCCAAAAGCCGCTG       | miRNA | miR-191     |
| t0023391 | 22 | 16 TGGAGAGAAAGGCAGTGCCTGA        | miRNA | miR-185     |
| t0023350 | 23 | 16 TGGAGAGAAAGGCAGTTCCTGGT       | miRNA | miR-185     |
| t0023256 | 20 | 16 TGGAGAGAAAGGCAGTACT           | miRNA | miR-185     |
| t0023318 | 20 | 16 TGAGGGAGTAGATTGTATTT          | miRNA | miR-1827    |
| t0023267 | 18 | 16 ACATTCAATTGCTGTCTGGT          | miRNA | miR-181b    |
| t0023233 | 26 | 16 TAGCAGCACGTAATATTGGCCATCA     | miRNA | miR-16b     |
| t0023487 | 20 | 16 GCGGGGAGCGGTCGGGCGGT          | miRNA | miR-1607    |
| t0023094 | 26 | 16 GGGGCGGGGAGCGGTCGGGCGGCGGC    | miRNA | miR-1607    |
| t0023223 | 21 | 16 TAGCAGCACGTAATATTTCGC         | miRNA | miR-16      |
| t0023248 | 20 | 16 TAGCAGTACGTAATATTGG           | miRNA | miR-16      |
| t0023032 | 22 | 16 TAGCAGAACGTAATATTGGAG         | miRNA | miR-16      |
| t0023526 | 19 | 16 TAGCAGCACATCATGGCTA           | miRNA | miR-15b     |
| t0023615 | 21 | 16 CAGCAGCACATCATGGTTTAC         | miRNA | miR-15b     |
| t0023263 | 22 | 16 TAGCATCACATCATGGTTTACA        | miRNA | miR-15b     |
| t0023280 | 22 | 16 TAGCAGCACATCATGGTTTACG        | miRNA | miR-15b     |
| t0023467 | 20 | 16 TAGGAGCACATCATGGTTTA          | miRNA | miR-15b     |
| t0023090 | 22 | 16 TAGTAGCAGCACATCATGGTTT        | miRNA | miR-15b     |
| t0023097 | 22 | 16 TAGCAGCCATCATGGTTTACA         | miRNA | miR-15b     |
| t0023362 | 20 | 16 TAGCAGCACATAATGGCTTG          | miRNA | miR-15a     |
| t0023189 | 22 | 16 CTCCCAACCCTTGTACCAGTGA        | miRNA | miR-150     |
| t0023595 | 26 | 16 ACAGTGCACACTACAGAACTTTGTCATC  | miRNA | miR-148a    |
| t0023136 | 19 | 16 CTACAGTATAGATGATGTT           | miRNA | miR-144     |
| t0023290 | 21 | 16 CATAAAGTAGAAAGCACTTCT         | miRNA | miR-142     |
| t0023518 | 22 | 16 TACCACAGGGTAGAACTACGGC        | miRNA | miR-140     |
| t0023056 | 22 | 16 ACTACAGGGTAGAACCACGGAC        | miRNA | miR-140     |

|          |    |                                  |       |            |
|----------|----|----------------------------------|-------|------------|
| t0023117 | 23 | 16 TACCACAGGGGAGAACCACGGAT       | miRNA | miR-140    |
| t0023212 | 23 | 16 TACCACAGGGTAAAACCACGGAC       | miRNA | miR-140    |
| t0023328 | 23 | 16 ACCACAGGGTAGAACCCCGGACA       | miRNA | miR-140    |
| t0023428 | 23 | 16 TGCCACAGGGTAGAACACGGAC        | miRNA | miR-140    |
| t0023523 | 25 | 16 TACCACAGGGTAGAACACGGGAATC     | miRNA | miR-140    |
| t0023561 | 23 | 16 TACCACAGGGTAGAACAAAGGAC       | miRNA | miR-140    |
| t0023209 | 22 | 16 TACCACAGGGTAGAACCACTGA        | miRNA | miR-140    |
| t0023651 | 23 | 16 TACCACAGAGTAGAACACGGAC        | miRNA | miR-140    |
| t0023425 | 21 | 16 TACCACAGGGTAGAACACCGG         | miRNA | miR-140    |
| t0023197 | 22 | 16 ACCACAGGGTAGAACCGCGGAC        | miRNA | miR-140    |
| t0023369 | 23 | 16 TACCACAGGGTAGAGCCACGGAC       | miRNA | miR-140    |
| t0023025 | 23 | 16 CTACCACAGGGTAGAACACGGGA       | miRNA | miR-140    |
| t0023074 | 21 | 16 CCACCTCCCCTGCAAACGTCC         | miRNA | miR-1306   |
| t0023133 | 23 | 16 TCTGGGCAACAAAGTGAGACCTG       | miRNA | miR-1285   |
| t0023163 | 21 | 16 TAGTACTGTGCATATCATCTA         | miRNA | miR-1278   |
| t0023289 | 20 | 16 AGGCATTGACTTCTCACTAG          | miRNA | miR-1256   |
| t0023361 | 25 | 16 TATCCTGTAGATCCGAATTTGTATC     | miRNA | miR-10a    |
| t0023363 | 23 | 16 AGCAGCATTGTACCGGGCTATGA       | miRNA | miR-103a   |
| t0023411 | 22 | 16 AGCAGCATTGAACAGGGCTATG        | miRNA | miR-103a   |
| t0023462 | 24 | 16 AGCAGCATTTTACAGGGCTATGAT      | miRNA | miR-103a   |
| t0023474 | 22 | 16 TACAGTACTGTGATAACTTATA        | miRNA | miR-101c   |
| t0023494 | 20 | 16 TACAGTAATGTGATAACTGA          | miRNA | miR-101    |
| t0023495 | 25 | 16 GTACAGTACTGTGATAACTGAAAAA     | miRNA | miR-101    |
| t0023575 | 22 | 16 TACAGTACTGTGATAACTTAAG        | miRNA | miR-101    |
| t0023578 | 20 | 16 GTACAGTACTGTGATAACTA          | miRNA | miR-101    |
| t0023336 | 19 | 16 TGAGGTAGTGTATTGTATA           | miRNA | let-7f-5p  |
| t0023531 | 22 | 16 TGAGGTGCTAGATTGTATAGTT        | miRNA | let-7f     |
| t0023442 | 19 | 16 TGAGGAAGTAGATTGTATA           | miRNA | let-7f     |
| t0023283 | 23 | 16 TGAGGAAGTAGATTGTATAGTTA       | miRNA | let-7f     |
| t0023051 | 25 | 16 TGAGGTAGTAGATTGTATAGTTACA     | miRNA | let-7f     |
| t0023068 | 21 | 16 AGAGGCAGTAGGTTGCATAGT         | miRNA | let-7d     |
| t0023081 | 22 | 16 AGAGGTAGTAGGTTGGATAGTT        | miRNA | let-7d     |
| t0023295 | 21 | 16 AGAGGAAGTAGGTTGCATAGT         | miRNA | let-7d     |
| t0023291 | 22 | 16 AGAGGTAGTAGGTTGCACAGTT        | miRNA | let-7d     |
| t0023112 | 21 | 16 AGAGGTAGTAGATTGCATAGT         | miRNA | let-7d     |
| t0023314 | 23 | 16 TGAGGTAGTAGGTTGTGCGGTTA       | miRNA | let-7b     |
| t0023482 | 23 | 16 CTGAGGTAGTAGGTTGTGTGGTT       | miRNA | let-7b     |
| t0023632 | 27 | 16 TGAGGTAGTAGGTTGTGTGGTAATATC   | miRNA | let-7b     |
| t0023553 | 34 | 16 TGAGGTAGTAGGTTGTGTGGTTGCTTACT | miRNA | let-7b     |
| t0023101 | 20 | 16 TGAGGTAGTAGTTTGTGTGG          | miRNA | let-7b     |
| t0023194 | 22 | 16 TGAGGTAGTAGGTTGTGTTTTT        | miRNA | let-7b     |
| t0023253 | 26 | 16 TGAGGTAGTAGGTTGTGTGGTTAGAA    | miRNA | let-7b     |
| t0023441 | 22 | 16 TGAGGTAGTAGGTTGTATATTC        | miRNA | let-7-5p   |
| t0023088 | 21 | 16 TCAGGTAGTAGGTTGTATAGT         | miRNA | let-7      |
| t0023100 | 20 | 16 TGAGGTAGTAGGTTGGATAG          | miRNA | let-7      |
| t0023341 | 20 | 16 TGAGGTAGTAGGTTGAATAG          | miRNA | let-7      |
| t0023409 | 24 | 16 TGAGGTAGTAGGTTGTATAGTTAG      | miRNA | let-7      |
| t0023601 | 20 | 16 TGAGTTAGTAGGTTGTATAG          | miRNA | let-7      |
| t0023127 | 21 | 16 TGAGGTAGTAGGTTGGTATAGT        | miRNA | let-7      |
| t0023164 | 21 | 15 TATACAACTTACTACTTTCAT         | miRNA | miR-98*    |
| t0023324 | 19 | 15 GGTGGAAGGTTGTAGGCAT           | miRNA | miR-965-5p |
| t0023340 | 23 | 15 GGTGGAAGGTTGTAGGCATGTAT       | miRNA | miR-965-5p |
| t0023452 | 22 | 15 CAAAGTGCTGTCGTGCAGGAA         | miRNA | miR-93     |
| t0023514 | 22 | 15 CAAAGTGCTGTCGTGCAGGGA         | miRNA | miR-93     |
| t0023585 | 20 | 15 GGCAGGTGGTGTAGTGGTA           | miRNA | miR-885    |
| t0023648 | 24 | 15 AGAGGAGATGGCGCAGGGGACACC      | miRNA | miR-877    |
| t0023155 | 24 | 15 TGCGGGGCTAGGGCTAACAGCAGA      | miRNA | miR-744    |
| t0023165 | 21 | 15 TGGAAGACTAGTGATTTTGT          | miRNA | miR-7      |

|          |    |                                   |       |             |
|----------|----|-----------------------------------|-------|-------------|
| t0023310 | 19 | 15 CTTTTTCTTTGAGACTCA             | miRNA | miR-627     |
| t0023461 | 23 | 15 TGTGACAGATTGATAACTGAATC        | miRNA | miR-542-3p  |
| t0023547 | 20 | 15 CCGCGAGGGGCCCCGGGCGG           | miRNA | miR-5126    |
| t0023548 | 20 | 15 TCCTGTAAGTACTGAGCTGACCCG       | miRNA | miR-486-5p  |
| t0023807 | 22 | 15 TCCTGTAAGTACTGAGCTGCCGCGAG     | miRNA | miR-486-5p  |
| t0023852 | 20 | 15 TCCTGTAAGTACTGAGCTGCCCGAG      | miRNA | miR-486-5p  |
| t0023882 | 27 | 15 TCCTGTAAGTACTGAGCTGCCCGAGCGGCA | miRNA | miR-486-5p  |
| t0023782 | 21 | 15 TCCTGTAAGTACTGAGCTGCCCCCA      | miRNA | miR-486-5p  |
| t0024303 | 23 | 15 TGTAGAGCAGGGAGCTGGAAGCT        | miRNA | miR-4732-5p |
| t0024140 | 20 | 15 AGAAGGGTCTGGGGCGGTTTT          | miRNA | miR-4516    |
| t0024347 | 20 | 15 GAGACGGGTCTGGGGCGTGCT          | miRNA | miR-4516    |
| t0023778 | 22 | 15 TGAGGGAGTAGGTTGTGGGGTT         | miRNA | miR-4510    |
| t0023773 | 22 | 15 AAACCGTTACCAATACTGAGTT         | miRNA | miR-451     |
| t0023886 | 26 | 15 AAACCGTTACCATTACTGAGAGTAAC     | miRNA | miR-451     |
| t0024143 | 24 | 15 AAAACCGTTACCATTACTGAGTTT       | miRNA | miR-451     |
| t0024041 | 19 | 15 ACCGTTACCATCACTGATT            | miRNA | miR-451     |
| t0023671 | 26 | 15 AAACCGTTACCATTACTGAGTAAAAA     | miRNA | miR-451     |
| t0023779 | 18 | 15 AAACCTTACCATTACTGA             | miRNA | miR-451     |
| t0023991 | 23 | 15 CAAACCGTTACCATTACTGAGTT        | miRNA | miR-451     |
| t0024072 | 28 | 15 AAACCGTTACCATTACTGAACTCTGAAC   | miRNA | miR-451     |
| t0024219 | 20 | 15 TTCGGGGTCTGGGCGCGGCT           | miRNA | miR-4508    |
| t0024335 | 19 | 15 GCACGGGCTGGGCGAGGCT            | miRNA | miR-4486    |
| t0023946 | 26 | 15 GTAGAGCTGAAGACTGTAGATCTTTA     | miRNA | miR-4451    |
| t0024299 | 22 | 15 AAAAGCTGGGCTGAGAGGGCGT         | miRNA | miR-4429    |
| t0024158 | 20 | 15 AGCCGCATTGTACAGGGCTA           | miRNA | miR-4289    |
| t0023704 | 21 | 15 TGACGGGCAGAGAGCGAGACT          | miRNA | miR-423-5p  |
| t0023810 | 24 | 15 TGAGGGGCAGAGAGCGAGGCTTTT       | miRNA | miR-423-5p  |
| t0023905 | 22 | 15 TGAGGGGCAGAGAGAGAGAATT         | miRNA | miR-423-5p  |
| t0023977 | 21 | 15 TGTGGGGCAGAGAGCGAGACT          | miRNA | miR-423-5p  |
| t0023993 | 23 | 15 TGAGGGGCAGAGAGCGAGACTGT        | miRNA | miR-423-5p  |
| t0024180 | 22 | 15 TGGGGGCAGAGAGCGAGACTTT         | miRNA | miR-423-5p  |
| t0024239 | 25 | 15 TGAGGGGCAGAGAGCGAGACTTTTG      | miRNA | miR-423-5p  |
| t0024290 | 22 | 15 AGGGGCAGAGAGCGAGACTTTA         | miRNA | miR-423-5p  |
| t0024077 | 24 | 15 TGAGGGGCAGATAGCGAGACTTTT       | miRNA | miR-423-5p  |
| t0024354 | 23 | 15 TGAGGGGCAGAGCGCGAGACTTA        | miRNA | miR-423-5p  |
| t0024160 | 22 | 15 TGAGGGGGAGAGAGCGAGACTT         | miRNA | miR-423-5p  |
| t0023749 | 22 | 15 ATGAGGATGGATAGCAAGGAGA         | miRNA | miR-3605-5p |
| t0024192 | 30 | 15 TTTGAAGACTGAAAGTGGAGAAGGGTTTCT | miRNA | miR-3526    |
| t0023685 | 19 | 15 TGAAGACTGAAAGTGGAGAA           | miRNA | miR-3526    |
| t0023885 | 22 | 15 GCCCCTGGCCTATCCTAGACA          | miRNA | miR-331     |
| t0023900 | 22 | 15 AAAAGCTGGGTTGGGAGGGCGT         | miRNA | miR-320d    |
| t0023943 | 23 | 15 AAAAGCTAGGTTGAGAGGGCGAA        | miRNA | miR-320a    |
| t0024067 | 22 | 15 AATAGAGTAGGCAAAGGACAGA         | miRNA | miR-3121-3p |
| t0024069 | 24 | 15 TGTAACATCCTTGACTGGAAGAA        | miRNA | miR-30e     |
| t0024070 | 26 | 15 GCGCGCGGGTCTGGGGGGCGGGGCGGA    | miRNA | miR-2981    |
| t0024172 | 22 | 15 CGGGTCTGGGGGGCGGGGCGGAC        | miRNA | miR-2981    |
| t0024183 | 22 | 15 TTCAAGTAATCCAGGATAGGAT         | miRNA | miR-26a     |
| t0024304 | 35 | 15 CATTGCACTTGTCTCGGTCTGAATACTCTC | miRNA | miR-25      |
| t0024317 | 22 | 15 CGTTGCACTTGTCTCGGTCTGA         | miRNA | miR-25      |
| t0023937 | 36 | 15 CATTGCACTTGTCTCGGTCTGCTTGAACTC | miRNA | miR-25      |
| t0024006 | 22 | 15 TGGCTCAGTTCAGCAGGAACCG         | miRNA | miR-24b     |
| t0024231 | 24 | 15 ATAAAGTGCTTATAGTGCAGGTAG       | miRNA | miR-20      |
| t0024184 | 20 | 15 TAGCAGCACATAAATATTGG           | miRNA | miR-195     |
| t0024319 | 22 | 15 CAACGGAATCCCAAAAAGCAGAA        | miRNA | miR-191     |
| t0023920 | 22 | 15 AAACGGAATCCCAAAAAGCAGCT        | miRNA | miR-191     |
| t0023913 | 20 | 15 CAACGGAATCCCAAAAAGAAG          | miRNA | miR-191     |
| t0023973 | 22 | 15 TGATATGTTTGATATATTAGGT         | miRNA | miR-190     |
| t0023752 | 24 | 15 TGGAGAGAAAGGCAGTTCCTGGGG       | miRNA | miR-185     |

|          |    |                              |       |             |
|----------|----|------------------------------|-------|-------------|
| t0024325 | 25 | 15 TGAGGGAGTAGGTTGTATGGTTATC | miRNA | miR-1827    |
| t0024134 | 19 | 15 TGAGGGAGTAGGTTGTATA       | miRNA | miR-1827    |
| t0023690 | 24 | 15 TTTGGCAATGGTAGAACTTACACT  | miRNA | miR-182     |
| t0023965 | 24 | 15 AACATTCATTGTTGTCGGTGGGAT  | miRNA | miR-181b    |
| t0024127 | 21 | 15 AACATCAACGCTGTCGGTTA      | miRNA | miR-181a    |
| t0024170 | 24 | 15 AAGCGGCGATGGCGGAGCTGAATT  | miRNA | miR-1636    |
| t0024294 | 19 | 15 CCAATATTACTGTGCTGCT       | miRNA | miR-16-2*   |
| t0024248 | 24 | 15 GGGGCGGGGAGCGGTCGGGCGGCG  | miRNA | miR-1607    |
| t0023777 | 22 | 15 CTGGGGCGGGGAGCGGTCGGG     | miRNA | miR-1607    |
| t0023962 | 19 | 15 TAGCAGCACGTAATATTC        | miRNA | miR-16      |
| t0024238 | 20 | 15 CAGCAGCACGTAATATTGG       | miRNA | miR-16      |
| t0024173 | 20 | 15 TAGTAGCACGTAATATTGG       | miRNA | miR-16      |
| t0023745 | 22 | 15 ATAGCAGCACGTAATATTGGA     | miRNA | miR-16      |
| t0023941 | 18 | 15 GCAGCACGTAATATTGG         | miRNA | miR-16      |
| t0024194 | 22 | 15 TAGCAGCACATCATGGTTTACT    | miRNA | miR-15b     |
| t0024345 | 22 | 15 TAGCAGCGCATCATGGTTTACA    | miRNA | miR-15b     |
| t0023841 | 19 | 15 TAGCAGCACATCATTGTTT       | miRNA | miR-15b     |
| t0024275 | 25 | 15 TAGCAGCACATCATGGTTTACAATA | miRNA | miR-15b     |
| t0023684 | 19 | 15 TAGCAGCACATCGTGGTTT       | miRNA | miR-15b     |
| t0023696 | 21 | 15 TAGCGGCACATAATGGTTTGT     | miRNA | miR-15a     |
| t0023906 | 20 | 15 GCAGCACATAATGGTTTGTG      | miRNA | miR-15a     |
| t0024209 | 21 | 15 TAGCAGCACATAATGCTTTGT     | miRNA | miR-15a     |
| t0023726 | 20 | 15 TAGCACACATAATGGTTTGT      | miRNA | miR-15a     |
| t0023808 | 22 | 15 TCAGTGCATCACAGAACTTTGA    | miRNA | miR-148b-3p |
| t0023857 | 21 | 15 GGATATCATCATATATTGTAA     | miRNA | miR-144*    |
| t0024012 | 23 | 15 CTACAGTATAGATGATGTACTTT   | miRNA | miR-144     |
| t0024097 | 20 | 15 CCCATAAAGTAGAAAGAACT      | miRNA | miR-142     |
| t0024014 | 18 | 15 CCATAAAGTAGAAAGCTA        | miRNA | miR-142     |
| t0024056 | 25 | 15 TACCACAGGGTAGAACTACGGAAAA | miRNA | miR-140     |
| t0024087 | 23 | 15 TACCACAGGGTAGGACCACGGAA   | miRNA | miR-140     |
| t0024222 | 24 | 15 TACCACAGGGTAGAACCCCGGAAA  | miRNA | miR-140     |
| t0024259 | 21 | 15 ACCACAGGGTACAACCACGGA     | miRNA | miR-140     |
| t0024063 | 23 | 15 TACCACAGGGTAGAACACGGCG    | miRNA | miR-140     |
| t0024188 | 20 | 15 ACTCGGCGTGCGGTCGGGCG      | miRNA | miR-1307    |
| t0024258 | 25 | 15 TCTGGGCAACAAAGTGAGACCTTAA | miRNA | miR-1285    |
| t0024342 | 21 | 15 AGGATGAGCAAAGAAAGTAGA     | miRNA | miR-1255a   |
| t0023781 | 23 | 15 CTTCCCCACCCTCTCCTGCAGAA   | miRNA | miR-1224-3p |
| t0023763 | 24 | 15 TAAAGTGCTGACAGTGCAGAAAAA  | miRNA | miR-106b    |
| t0023939 | 20 | 15 AGCAGCCTTGACAGGGCTA       | miRNA | miR-103a    |
| t0024249 | 23 | 15 AGCAGCATTGTGCAGGGCTATGA   | miRNA | miR-103a    |
| t0024333 | 22 | 15 AGCAGCATTGTACAGGGCTAAG    | miRNA | miR-103a    |
| t0023681 | 23 | 15 GTACAGTACTGTGATAACTAAGA   | miRNA | miR-101c    |
| t0023923 | 21 | 15 GGACAGTACTGTGATAACTGA     | miRNA | miR-101c    |
| t0023926 | 22 | 15 GTACAGTACTATGATAACTGAA    | miRNA | miR-101b    |
| t0023928 | 21 | 15 GTACAGTACTGTGATAAATGA     | miRNA | miR-101     |
| t0024163 | 22 | 15 TACAGTATTGTGATAACTGAAT    | miRNA | miR-101     |
| t0024215 | 21 | 15 TACAGTACTGTAATAACTGAA     | miRNA | miR-101     |
| t0023785 | 20 | 15 TACAGTACTGGGATAACTGA      | miRNA | miR-101     |
| t0024300 | 18 | 15 TGAGGTAGTAGATTGTTA        | miRNA | let-7j      |
| t0023869 | 23 | 15 TTGAGGTAGTAGATTGTATAGTT   | miRNA | let-7f      |
| t0023872 | 22 | 15 GGTAGTAGATTGTATAGTTATC    | miRNA | let-7f      |
| t0023815 | 23 | 15 TGAGTTAGTAGATTGTATAGTTA   | miRNA | let-7f      |
| t0024203 | 20 | 15 TGAGGTAGTAGATTGTAGAG      | miRNA | let-7f      |
| t0024274 | 23 | 15 TGAGGAAGTAGATTGTATAGTTG   | miRNA | let-7f      |
| t0024086 | 23 | 15 TGAGGTAGTAGATTGTATATTTA   | miRNA | let-7f      |
| t0024109 | 22 | 15 AGAGGTAGTAGGTTGCATAGCT    | miRNA | let-7d      |
| t0023990 | 20 | 15 AGAGGTAGTAGGTTGCATAA      | miRNA | let-7d      |
| t0023819 | 25 | 15 TGAGGTACTAGGTTGTATGGTTATC | miRNA | let-7c      |

|          |    |                                  |       |              |
|----------|----|----------------------------------|-------|--------------|
| t0023910 | 19 | 15 TGAGGTAGTAGGTTTGGTT           | miRNA | let-7a       |
| t0023969 | 21 | 15 TGAGGTAGTAGGTTGTATAAT         | miRNA | let-7        |
| t0024181 | 22 | 15 TGAGCTAGTAGGTTGTATAGTT        | miRNA | let-7        |
| t0024051 | 20 | 14 TTGCACTTGTCCCGGCCTGT          | miRNA | miR-92c      |
| t0023701 | 22 | 14 TATTGCACTTGTCCCGGCCATT        | miRNA | miR-92b      |
| t0023730 | 24 | 14 ATTCTAATTTCTCCACGTCTTTGT      | miRNA | miR-576-5p   |
| t0023877 | 19 | 14 GCGAGGGGCCCCGGGGCGGG          | miRNA | miR-5126     |
| t0023889 | 23 | 14 AAACAAACATGGTGCACCTTCTTT      | miRNA | miR-495      |
| t0024068 | 23 | 14 TCCTGTACTGAGCTGCCCAAGA        | miRNA | miR-486-5p   |
| t0024220 | 26 | 14 TCCTGTACTGAGTTGCCCGAGAAGA     | miRNA | miR-486-5p   |
| t0023932 | 21 | 14 TCCTGGACTGAGCTGCCCCGA         | miRNA | miR-486-5p   |
| t0024114 | 22 | 14 TCCTGTACTGAGGTGCCCCGAG        | miRNA | miR-486-5p   |
| t0023790 | 23 | 14 TCCTGTACTGGGCTGCCCGAGA        | miRNA | miR-486-5p   |
| t0024135 | 19 | 14 AGAAGGGTCGGGGCGGATC           | miRNA | miR-4516     |
| t0023836 | 19 | 14 CGGGGGGAGAAGGGTCGGG           | miRNA | miR-4516     |
| t0024196 | 19 | 14 TGAGGGAGTAGGTTGTGTG           | miRNA | miR-4510     |
| t0024979 | 23 | 14 AAACCGTTACCATCACTGAGTTT       | miRNA | miR-451      |
| t0024472 | 21 | 14 ACACCGTTACCATTACTGAGT         | miRNA | miR-451      |
| t0024948 | 22 | 14 AAACCGTTACCATTACTGTGTT        | miRNA | miR-451      |
| t0024373 | 24 | 14 CGTTACCATTACTGAGTAAACAAA      | miRNA | miR-451      |
| t0024429 | 34 | 14 AAACCGTTACCATTACTGAGAAGTTTGAG | miRNA | miR-451      |
| t0024578 | 20 | 14 AAACCGTACCATTACTGAG           | miRNA | miR-451      |
| t0024618 | 25 | 14 AAACCGTTACCATTACTGAGTAAA      | miRNA | miR-451      |
| t0024793 | 23 | 14 AAACCGTTACCACTACTGAGTTT       | miRNA | miR-451      |
| t0024836 | 21 | 14 TTCGGGGTCTGGGCGCGTTA          | miRNA | miR-4508     |
| t0024923 | 20 | 14 AACAGCATTGTACAGGGCTA          | miRNA | miR-4289     |
| t0024573 | 24 | 14 AATGACACGATCACTCCCGTTGAT      | miRNA | miR-425      |
| t0024742 | 23 | 14 TGAGGGGAAGAGAGCGAGAATTT       | miRNA | miR-423-5p   |
| t0024376 | 21 | 14 TGAGGCAGAGAGCGAGACTTT         | miRNA | miR-423-5p   |
| t0024478 | 23 | 14 TGAGGGGCAGGCAGCGAGACTTT       | miRNA | miR-423-5p   |
| t0024497 | 20 | 14 TGAGGGGCAGAGAGCCAGAC          | miRNA | miR-423-5p   |
| t0024549 | 24 | 14 TGAGGGGAAGAGAGCGAGACTTTT      | miRNA | miR-423-5p   |
| t0024665 | 24 | 14 TTTGTTTCGTTTCGGCTCGCGTGATC    | miRNA | miR-375      |
| t0024784 | 22 | 14 TTTCTACCCTACCTGAAGACT         | miRNA | miR-3685     |
| t0024826 | 28 | 14 AACTTTGAAGACTGAAGTGGAGAAGGGG  | miRNA | miR-3526     |
| t0024852 | 23 | 14 GGCTCTGTAGCTCAGTAGGTATC       | miRNA | miR-3488     |
| t0024888 | 23 | 14 AAAAGCTGGGTTGAGCGGGCGTA       | miRNA | miR-320d     |
| t0024452 | 22 | 14 AAAAGCTGGGTTGAGAGGCCGA        | miRNA | miR-320d     |
| t0024535 | 21 | 14 AAAAGCTGGGTTGAGAGGGGG         | miRNA | miR-320d     |
| t0024550 | 23 | 14 AAAAGCTGGGTTGAGAGGACGAA       | miRNA | miR-320d     |
| t0024483 | 22 | 14 ATAAGCTGGGTTGAGAGGGCGG        | miRNA | miR-320d     |
| t0024837 | 22 | 14 CAAAGCTGGGTTGAGAGGGCGA        | miRNA | miR-320a     |
| t0024876 | 23 | 14 AAAAGCTGGGTTGAGACGGCGAT       | miRNA | miR-320a     |
| t0024902 | 22 | 14 AAAACCTGGGTTGAGAGGGCGA        | miRNA | miR-320a     |
| t0024954 | 20 | 14 ATATTGCACATTAATAAGTT          | miRNA | miR-32       |
| t0024704 | 23 | 14 TTTTCAGTCGGATGTTTACAGCA       | miRNA | miR-30e*     |
| t0024958 | 26 | 14 TTCAAGTAATCCAGGATAGGCTTATC    | miRNA | miR-26a      |
| t0024658 | 21 | 14 CATTGCACTTGTCTAGGTCTG         | miRNA | miR-25       |
| t0024759 | 22 | 14 CATTACACTTGTCTCGGTCTGA        | miRNA | miR-25       |
| t0024450 | 21 | 14 TGACTIONGGCGGAACATCTGT        | miRNA | miR-219-2-3p |
| t0024667 | 25 | 14 TAGCTTATCAGACTGGTGTGGATC      | miRNA | miR-21       |
| t0024709 | 25 | 14 TGAATGTAAAGAAGTGTGTGGATC      | miRNA | miR-206      |
| t0024725 | 22 | 14 TGTGCAAATCCATGCAAACTA         | miRNA | miR-19b      |
| t0024924 | 23 | 14 CAACGGAATACCAAAAGCAGCTG       | miRNA | miR-191      |
| t0024574 | 21 | 14 CGGCGGGGACGGCGATTGGAA         | miRNA | miR-1908     |
| t0024904 | 22 | 14 TGGAGAGAAAGGAAGTTCCTGT        | miRNA | miR-185      |
| t0024992 | 21 | 14 TGGAGAGAAAGGCAGTTCGTG         | miRNA | miR-185      |
| t0024803 | 18 | 14 ATGGAGAGAAAGGCAGTT            | miRNA | miR-185      |

|          |    |                                  |       |             |
|----------|----|----------------------------------|-------|-------------|
| t0024975 | 23 | 14 TCGAGAGAAAGGCAGTTCCTGAA       | miRNA | miR-185     |
| t0024617 | 23 | 14 TGGAGAGAAAGGCAGTTACTGAT       | miRNA | miR-185     |
| t0024541 | 27 | 14 ATGGCACTGGTAGAATTCACCTTCGTAT  | miRNA | miR-183     |
| t0024679 | 24 | 14 TATGGCACTGGTAGAATTCACATC      | miRNA | miR-183     |
| t0024960 | 24 | 14 AACATTCATTGTTGTCGGTGGGTA      | miRNA | miR-181d    |
| t0024671 | 25 | 14 AACATTC AACGCTGTCGGTGAGTTT    | miRNA | miR-181a    |
| t0024942 | 22 | 14 AACATTC AACGCTGTCGGGGAG       | miRNA | miR-181a    |
| t0024806 | 26 | 14 ATAGCAGCACGTA AATATTGGCGAAA   | miRNA | miR-16      |
| t0024827 | 22 | 14 TAGCAGCAAATCATGGTTTACA        | miRNA | miR-15b     |
| t0024833 | 22 | 14 TAGCAGCACATCGTGGTTTACA        | miRNA | miR-15b     |
| t0024486 | 22 | 14 TAGCAGCACCTCATGGTTTACA        | miRNA | miR-15b     |
| t0024597 | 22 | 14 TAGCGGCACATCATGGTTTACA        | miRNA | miR-15b     |
| t0024712 | 22 | 14 TAGCAGCACATAATGGTTTGTG        | miRNA | miR-15a     |
| t0024730 | 19 | 14 TAGCAGCACACAATGGTTG           | miRNA | miR-15a     |
| t0024769 | 20 | 14 TAGCAGCACCTAATGGTTTG          | miRNA | miR-15a     |
| t0024533 | 23 | 14 TGAGA ACTGAATTCATAGGCAA       | miRNA | miR-146b-5p |
| t0024814 | 21 | 14 GTATTGTTTCCTACTTTATGG         | miRNA | miR-142-3p  |
| t0024656 | 19 | 14 AGTGTTCCTACTTTATGG            | miRNA | miR-142*    |
| t0024788 | 20 | 14 CCCATAAAGAAGAAAGCACT          | miRNA | miR-142     |
| t0024790 | 24 | 14 TACTACAGGGTAGA ACCACGGACA     | miRNA | miR-140     |
| t0024818 | 24 | 14 TACCACAGCGTAGA ACCACGGAAT     | miRNA | miR-140     |
| t0024538 | 25 | 14 TACCACAGGGTAGA ACCACGGAATT    | miRNA | miR-140     |
| t0024566 | 22 | 14 TACCACTGGGTAGA ACCACGGA       | miRNA | miR-140     |
| t0024642 | 25 | 14 TACCACAGGGTAGA ACCACGGAAGT    | miRNA | miR-140     |
| t0024821 | 23 | 14 TACCACAGGGTAGA ACCACGTAC      | miRNA | miR-140     |
| t0024757 | 21 | 14 ACCACAGGGT CGAACCACGGA        | miRNA | miR-140     |
| t0024914 | 28 | 14 ACCACAGGGTAGA ACCACGGACAAAAAA | miRNA | miR-140     |
| t0024956 | 22 | 14 ACCACAGGGCAGA ACCACGGAA       | miRNA | miR-140     |
| t0024594 | 23 | 14 TGCCACAGGGTAGA ACCACGGAA      | miRNA | miR-140     |
| t0024423 | 22 | 14 CAGTGCAATGTTTAAAGGGCAT        | miRNA | miR-130a    |
| t0024404 | 21 | 14 TCTGGGCAACAAAGTGAGACG         | miRNA | miR-1285    |
| t0024877 | 24 | 14 TCCCTGAGCCCTTTAACCTGTATC      | miRNA | miR-125a-5p |
| t0024394 | 23 | 14 AGGATGAGCAAAGAAAGTAGATT       | miRNA | miR-1255a   |
| t0024463 | 21 | 14 GTGAGGACTCGGGAGGGGGAA         | miRNA | miR-1224    |
| t0024514 | 20 | 14 AAAGTGCTGACAGTGCAGAT          | miRNA | miR-106b    |
| t0024521 | 23 | 14 AGCAGCATTGTCCAGGGCTATGA       | miRNA | miR-103a    |
| t0024559 | 23 | 14 AGCAGCATTGTACAGGGCTAAGA       | miRNA | miR-103a    |
| t0024696 | 21 | 14 AGCAGCATTGTACAGCGCTAT         | miRNA | miR-103a    |
| t0024792 | 23 | 14 AGCAGCATTGTACAGAGCTATGA       | miRNA | miR-103a    |
| t0024797 | 22 | 14 AGCAGCATTGTACCGGGCTATG        | miRNA | miR-103a    |
| t0024990 | 21 | 14 AGCAGCATTGTACAGGGCTGT         | miRNA | miR-103a    |
| t0025003 | 21 | 14 AGCAGCATTGTACAGGGGTAT         | miRNA | miR-103a    |
| t0024607 | 20 | 14 AGCAACATTGTACAGGGCTA          | miRNA | miR-103a    |
| t0024507 | 23 | 14 AGCAGCACTGTACAGGGCTATGA       | miRNA | miR-103a    |
| t0024359 | 22 | 14 GGACAGTACTGTGATAACTGAA        | miRNA | miR-101c    |
| t0024898 | 23 | 14 GTACAGTACTGTGATAACTGAAC       | miRNA | miR-101     |
| t0024493 | 22 | 14 TACAGTACTTTGATAACTGAAG        | miRNA | miR-101     |
| t0024687 | 22 | 14 TACAGTACTGTGATAACTGTAA        | miRNA | miR-101     |
| t0024590 | 22 | 14 TGAGGTAGTAGTTTGTGGTGTT        | miRNA | let-7i      |
| t0024601 | 19 | 14 TGAGGTAGTAGTTTGCCT            | miRNA | let-7i      |
| t0024689 | 22 | 14 TGAGGTAGTAGTTTGTGATGTT        | miRNA | let-7i      |
| t0024702 | 26 | 14 TGAGGTAGTAGTTTGTACAGTTTATC    | miRNA | let-7g      |
| t0024841 | 22 | 14 TGAGGTAGTAGTTTGTACTGTT        | miRNA | let-7g      |
| t0024919 | 21 | 14 TGAGGTAGTAGTTTGTACCGT         | miRNA | let-7g      |
| t0024946 | 21 | 14 TGAGGTAGTAGATTGTAGTTG         | miRNA | let-7f-5p   |
| t0024962 | 19 | 14 TGAGGTAGTAGATTGTGTA           | miRNA | let-7f      |
| t0024987 | 23 | 14 TGAGGTAGTAGATTGTGTA           | miRNA | let-7f      |
| t0024413 | 19 | 14 TGAGGTAGTAGCTGTATA            | miRNA | let-7f      |

|          |    |                                 |       |              |
|----------|----|---------------------------------|-------|--------------|
| t0024635 | 26 | 14 TGAGGTAGTAGATTGTATAGTTACGT   | miRNA | let-7f       |
| t0024932 | 21 | 14 TGAGGTGTTAGATTGTATAGT        | miRNA | let-7f       |
| t0024967 | 22 | 14 TGAGGTAGTAGATTGTGTATTT       | miRNA | let-7f       |
| t0024624 | 19 | 14 TGGGGTAGTAGATTGTATA          | miRNA | let-7f       |
| t0024690 | 21 | 14 GAGGTAGTAGGTTGTGTGGTA        | miRNA | let-7b       |
| t0024955 | 22 | 14 TGAGGTAGTAGATTGTGTGGTA       | miRNA | let-7b       |
| t0024763 | 24 | 14 TGAGGTAGTAGGTTGTATAAAAGT     | miRNA | let-7-5p     |
| t0024785 | 20 | 14 TGAGGTAGTAGGTTGTATCG         | miRNA | let-7        |
| t0024815 | 18 | 14 TGTAGTAGGTTGTATAGT           | miRNA | let-7        |
| t0024660 | 24 | 14 TGAGGTAGTAGGTTGTATAGTTGC     | miRNA | let-7        |
| t0024416 | 19 | 14 TGGGGTAGTAGGTTGTATA          | miRNA | let-7        |
| t0024611 | 18 | 14 GAGGTAGTAGGTTGTATA           | miRNA | let-7        |
| t0024634 | 21 | 13 TTCTAGTAAGAGTGGCAGTCG        | miRNA | miR-628-3p   |
| t0024649 | 20 | 13 CCTCTTTTCTTTGAGACTCA         | miRNA | miR-627      |
| t0024807 | 19 | 13 CGGGAAGGCATTCTGATAT          | miRNA | miR-541      |
| t0024842 | 23 | 13 TGTACTGAGTTGCCCCGAAGGCG      | miRNA | miR-486-5p   |
| t0024966 | 29 | 13 TCCTGTACTGAGCTGCCCCGAGACGGCC | miRNA | miR-486-5p   |
| t0024777 | 22 | 13 ACCTGTACTGAGCTGCCCCGAG       | miRNA | miR-486-5p   |
| t0024848 | 23 | 13 TCCTATACTGAGCTGCCCCGAGA      | miRNA | miR-486-5p   |
| t0024558 | 22 | 13 TCCTGTACTTAGCTGCCCCGAA       | miRNA | miR-486-5p   |
| t0024529 | 21 | 13 TAGAGCAGGGAGCAGGAAGCT        | miRNA | miR-4732-5p  |
| t0024542 | 26 | 13 GAGAGAAGGGTCGGGGCGGCAGGGGC   | miRNA | miR-4516     |
| t0024636 | 22 | 13 AGAAGGGTCGGGGCGGCAGGTT       | miRNA | miR-4516     |
| t0024738 | 24 | 13 TGAGGGAGTAGGTTGTGTGGTTAT     | miRNA | miR-4510     |
| t0024978 | 20 | 13 AAACCTTACCATTACTGAGT         | miRNA | miR-451      |
| t0025231 | 22 | 13 TAACCGTTACCATTACTGAGTT       | miRNA | miR-451      |
| t0025194 | 23 | 13 AAACCGTTAGCATTACTGAGTTT      | miRNA | miR-451      |
| t0025627 | 20 | 13 GAGAAACCGTTACCATTACT         | miRNA | miR-451      |
| t0025228 | 24 | 13 AAACCGTTAACATTACTGAGTTTA     | miRNA | miR-451      |
| t0025370 | 24 | 13 AAACCGTTACCATTATTGAGTTTA     | miRNA | miR-451      |
| t0025495 | 20 | 13 AAACCGTTACCATTACTGAG         | miRNA | miR-451      |
| t0025520 | 24 | 13 AGTTACCATTACTGAGTTAAACCA     | miRNA | miR-451      |
| t0025616 | 22 | 13 TCGCATCCGAGTCACGGCACCA       | miRNA | miR-4454     |
| t0025585 | 22 | 13 TGAGGGGCAGAGAGCGAAACTT       | miRNA | miR-423-5p   |
| t0025226 | 23 | 13 GAGGGGCAGAGAGCGAGACTTTT      | miRNA | miR-423-5p   |
| t0025281 | 22 | 13 TGAGGGGCCGAGAGCGAGACTT       | miRNA | miR-423-5p   |
| t0025499 | 19 | 13 TGAGGGGCAGATAGCGAGA          | miRNA | miR-423-5p   |
| t0025041 | 21 | 13 TGAGGGGCAGAAAGCGAGATT        | miRNA | miR-423-5p   |
| t0025070 | 24 | 13 TGAGGGGCAGAGAGCGAGACTCGC     | miRNA | miR-423-5p   |
| t0025078 | 23 | 13 TGGACTCGCAGGAACAGGCCTTA      | miRNA | miR-4001b-5p |
| t0025131 | 19 | 13 ATCGTAGAGGAAAATCCAC          | miRNA | miR-376a     |
| t0025233 | 20 | 13 GGGTGGATCACGATGCAATT         | miRNA | miR-363*     |
| t0025339 | 18 | 13 GGGGTGGGGTCGGCGGGG           | miRNA | miR-3621     |
| t0025387 | 27 | 13 CCTTGAGGACTGATGTGGAGAAGGGTT  | miRNA | miR-3526     |
| t0025620 | 22 | 13 GTGGAATCCAGGACGCGCTTT        | miRNA | miR-3503     |
| t0025436 | 22 | 13 TCTCACACAGAAATAGCACCCG       | miRNA | miR-342-3p   |
| t0025182 | 22 | 13 TCTCACACAGAAATCGAACCCG       | miRNA | miR-342-3p   |
| t0025340 | 22 | 13 AAAAGCTGGGTTAAGAGGGCGT       | miRNA | miR-320d     |
| t0025412 | 22 | 13 AAAAGCTGGGTTGAGAGGCGAT       | miRNA | miR-320d     |
| t0025446 | 25 | 13 AAAAGCTGGGTTGAGAGGGCGTTTT    | miRNA | miR-320d     |
| t0025461 | 22 | 13 AAAAGCCGGGTTGAGAGGGCGT       | miRNA | miR-320c     |
| t0025536 | 23 | 13 AGAAGCTGGGTTGAGAGGGCGAA      | miRNA | miR-320a     |
| t0025459 | 23 | 13 AAAAGCTGGGTTGAGAGAGCGAA      | miRNA | miR-320a     |
| t0025090 | 25 | 13 CGAAAAGCTGGGTTGAGAGGGCGAA    | miRNA | miR-320a     |
| t0025330 | 23 | 13 AAAAGCTGGGTTAAGAGGGCGAA      | miRNA | miR-320a     |
| t0025264 | 21 | 13 TGGAAGGTAGACGGCCAGAGT        | miRNA | miR-3190     |
| t0025466 | 19 | 13 CGCGGGTCGGGGGGCGGGG          | miRNA | miR-2981     |
| t0025580 | 22 | 13 CATTGCACTTGTCTCGGTCTAA       | miRNA | miR-25       |



|          |    |                                 |       |             |
|----------|----|---------------------------------|-------|-------------|
| t0025127 | 21 | 13 ATTGCACTTGTCTCGGTCTGT        | miRNA | miR-25      |
| t0025565 | 22 | 13 GGCTCAGTTCAGCAGGAACAGA       | miRNA | miR-24b     |
| t0025155 | 21 | 13 CTAAGGGCTGGGTCTGGTCTGGG      | miRNA | miR-2487    |
| t0025223 | 23 | 13 TGTCAGTTTGTCAAATACCCCAT      | miRNA | miR-223     |
| t0025460 | 22 | 13 AGTGAGATTGTTGCATATTTAT       | miRNA | miR-2162-5p |
| t0025624 | 24 | 13 TGAATGTAAAGAAGTATGTATATC     | miRNA | miR-1a      |
| t0025040 | 24 | 13 ATGACCTATGAATTGACAGCCATC     | miRNA | miR-192     |
| t0025214 | 23 | 13 CAACGGAATCCCAAAAGCAGCGG      | miRNA | miR-191     |
| t0025440 | 22 | 13 CAACGGCATCCCAAAAGCAGCT       | miRNA | miR-191     |
| t0025594 | 23 | 13 AACGGAATCCCAAAAGCCGCTGA      | miRNA | miR-191     |
| t0025365 | 23 | 13 TGGAGGGAAAGGCAGTTCCTGAT      | miRNA | miR-185     |
| t0025555 | 21 | 13 TGGAGAGAAAGGCAGTACCTG        | miRNA | miR-185     |
| t0025187 | 23 | 13 AGACCTACTTATCTACCAACAGC      | miRNA | miR-1839-3p |
| t0025326 | 22 | 13 AAGGTAGATAGAACAGGGCTTG       | miRNA | miR-1839    |
| t0025081 | 21 | 13 TGAATTACCGAAGGGCCATAA        | miRNA | miR-183*    |
| t0025442 | 32 | 13 TATGGCACTGGTAGAATTCATAATCCCA | miRNA | miR-183     |
| t0025622 | 22 | 13 TGAGGGAGTAGATTGTATACTT       | miRNA | miR-1827    |
| t0025498 | 23 | 13 AACATTCATTGTTGTCGGTGGGA      | miRNA | miR-181b    |
| t0025193 | 23 | 13 GCTGGGGGCGGGGAGCGGTCTGGG     | miRNA | miR-1607    |
| t0025046 | 21 | 13 AGCAGCACGTAAATATTGTCTG       | miRNA | miR-16      |
| t0025096 | 26 | 13 AATCTAGCAGCACGTAAATATTGGCG   | miRNA | miR-16      |
| t0025417 | 19 | 13 TAGTAGCACATCATGGTTT          | miRNA | miR-15b     |
| t0025546 | 19 | 13 TGGCAGCACATCATGGTTT          | miRNA | miR-15b     |
| t0025093 | 22 | 13 TAGCAACACATCATGGTTTACA       | miRNA | miR-15b     |
| t0025375 | 22 | 13 TAGCAGCACATAATGGTTTGAA       | miRNA | miR-15a     |
| t0025252 | 21 | 13 TGGCAGCACATAATGGTTTGT        | miRNA | miR-15a     |
| t0025050 | 18 | 13 TAGCAGCACATAATGGTG           | miRNA | miR-15a     |
| t0025064 | 21 | 13 TAGCAACACATAATGGTTTGT        | miRNA | miR-15a     |
| t0025389 | 20 | 13 TGGCAGCACATAATGGTTTG         | miRNA | miR-15a     |
| t0025065 | 18 | 13 TCTCCAACCCTTGTACC            | miRNA | miR-150     |
| t0025366 | 18 | 13 ACAGTATAGATGATGTAT           | miRNA | miR-144     |
| t0025348 | 22 | 13 TACAGTATAGATGATGTACATT       | miRNA | miR-144     |
| t0025301 | 26 | 13 TACAGTATAGATGATGTACTAAAAAA   | miRNA | miR-144     |
| t0025316 | 21 | 13 ACAGTATAGATGATGTACTAA        | miRNA | miR-144     |
| t0025008 | 23 | 13 TGAGATGAAGCACTGTAGAGATC      | miRNA | miR-143     |
| t0025016 | 21 | 13 CATAAAGTAGAAAGCACTACA        | miRNA | miR-142-5p  |
| t0025120 | 22 | 13 GCCACAGGGTAGAACCACGGAA       | miRNA | miR-140     |
| t0025057 | 22 | 13 ACCGCAGGGTAGAACCACGGAC       | miRNA | miR-140     |
| t0025119 | 21 | 13 TACCACAGGGTAGAACCAAGG        | miRNA | miR-140     |
| t0025144 | 24 | 13 TACCACAGGATAGAACCACGGACA     | miRNA | miR-140     |
| t0025229 | 22 | 13 ACCACAGGGTAGAACCACGGCG       | miRNA | miR-140     |
| t0025434 | 21 | 13 ACCTCAGGGTAGAACCACGGA        | miRNA | miR-140     |
| t0025066 | 22 | 13 TACCACAGGGTAGACCCACGGA       | miRNA | miR-140     |
| t0025068 | 23 | 13 TACCACAGGGTAGAAACAAGGAC      | miRNA | miR-140     |
| t0025312 | 22 | 13 ACCACGGGGTAGAACCACGGAC       | miRNA | miR-140     |
| t0025323 | 22 | 13 ACCATAGGGTAGAACCACGGAA       | miRNA | miR-140     |
| t0025369 | 21 | 13 CCCACAGGGTAGAACCACGGA        | miRNA | miR-140     |
| t0025587 | 20 | 13 TTTCCGGCTCGCGTGGGGGT         | miRNA | miR-1180    |
| t0025077 | 20 | 13 CAGCATTGTACAGGGCTAGA         | miRNA | miR-107     |
| t0025029 | 20 | 13 CCGCACTGTGGGGACTTGCT         | miRNA | miR-106b*   |
| t0025105 | 22 | 13 AGCCGCATTGTACAGGGCTATG       | miRNA | miR-103a    |
| t0025121 | 23 | 13 AGCAGCATTGTACAGGGCTACGA      | miRNA | miR-103a    |
| t0025163 | 22 | 13 AGCAGCATTGTCCAGGGCTATG       | miRNA | miR-103a    |
| t0025405 | 23 | 13 AGCAGCATTGTACAGGGCTGTGA      | miRNA | miR-103a    |
| t0025420 | 22 | 13 AGCAGCATTGTACAGGGCTACG       | miRNA | miR-103a    |
| t0025482 | 22 | 13 AGCACCATTGTACAGGGCTATG       | miRNA | miR-103a    |
| t0025494 | 23 | 13 AGCAACATTGTACAGGGCTATGA      | miRNA | miR-103a    |
| t0025511 | 20 | 13 AGCAGCGTTGTACAGGGCTA         | miRNA | miR-103a    |

|          |    |                               |       |             |
|----------|----|-------------------------------|-------|-------------|
| t0025514 | 20 | 13 AGCAGCATTGCACAGGGCTA       | miRNA | miR-103a    |
| t0025605 | 20 | 13 AGCAGCATTGTACAGAGCTA       | miRNA | miR-103a    |
| t0025266 | 18 | 13 CAGTACTGTGATAACTGA         | miRNA | miR-101c    |
| t0025322 | 22 | 13 GCACAGTACTGTGATAACTGAA     | miRNA | miR-101c    |
| t0025506 | 21 | 13 TACAGTACTGTGATAACTGGA      | miRNA | miR-101     |
| t0025019 | 22 | 13 GTACAGGACTGTGATAACTGAA     | miRNA | miR-101     |
| t0025164 | 22 | 13 GTACAGTACCGTGATAACTGAA     | miRNA | miR-101     |
| t0025224 | 21 | 13 TACAGTACTGTGGTAACTGAA      | miRNA | miR-101     |
| t0025250 | 21 | 13 GTACAGTACTGTGATAACTTA      | miRNA | miR-101     |
| t0025374 | 25 | 13 ACCCTGTAGATCCGAATTTGTGATC  | miRNA | miR-10      |
| t0025458 | 23 | 13 TGAGGGAGTAGTTTGTGCTGTTA    | miRNA | let-7i      |
| t0025474 | 22 | 13 TGAGGTAGTCGTTTGTACAGTT     | miRNA | let-7g      |
| t0025478 | 22 | 13 TGAGGTACTAGTTTGTACAGTT     | miRNA | let-7g      |
| t0025554 | 21 | 13 TGGGGTAGTAGTTTGTACAGT      | miRNA | let-7g      |
| t0025619 | 22 | 13 TGTGGTAGTAGTTTGTACAGTT     | miRNA | let-7g      |
| t0025122 | 21 | 13 TGAGGTAGTAGACTTTATAGT      | miRNA | let-7f      |
| t0025177 | 26 | 13 GTTCTGAGGTAGTAGATTGTATAGTT | miRNA | let-7f      |
| t0025091 | 23 | 13 TGAGGTAGTAGATTGCATAGTTG    | miRNA | let-7f      |
| t0025167 | 18 | 13 TGAGGTAGTAGATTGTGCG        | miRNA | let-7f      |
| t0025171 | 24 | 13 ATGAGGTAGTAGATTGTATAGTTT   | miRNA | let-7f      |
| t0025328 | 19 | 13 TGAGGTAGTAGTTTGTATA        | miRNA | let-7f      |
| t0025439 | 23 | 13 TGGGGTAGTAGATTGTATAGTTG    | miRNA | let-7f      |
| t0025085 | 23 | 13 TGAGGTAGTAGATTGTATAGGTG    | miRNA | let-7f      |
| t0025075 | 21 | 13 AGAGGTAGTAGGTTGCATAAT      | miRNA | let-7d      |
| t0025060 | 22 | 13 AGAGGTATTAGGTTGCATAGTT     | miRNA | let-7d      |
| t0025165 | 21 | 13 AGAGGTAGTAGGTTACATAGT      | miRNA | let-7d      |
| t0025261 | 18 | 13 TGAGGTAGTAGGTTGTGG         | miRNA | let-7b      |
| t0025489 | 20 | 13 TGAGGTAGTGGGTTGTGTGG       | miRNA | let-7b      |
| t0025143 | 20 | 13 TGAGGTGGTAGGTTGTGTGG       | miRNA | let-7b      |
| t0025179 | 20 | 13 TGAGGTAGTAGGCTGTGTGG       | miRNA | let-7b      |
| t0025237 | 25 | 13 TGAGGTAGTAGGTTGTATAGTAATC  | miRNA | let-7-5p    |
| t0025253 | 25 | 13 TGAGGTATTAGGTTGTATAGTTATC  | miRNA | let-7       |
| t0025307 | 22 | 13 GGAGGTAGTAGGTTGTATAGTT     | miRNA | let-7       |
| t0025481 | 20 | 13 TGAGGTAGTAGGTTGTCTAG       | miRNA | let-7       |
| t0025548 | 22 | 12 CAAAGTGCTGTTTCGTGCCGGTA    | miRNA | miR-93      |
| t0025614 | 22 | 12 CAAAGTGCTGTTTCGTGCAGGCA    | miRNA | miR-93      |
| t0025017 | 20 | 12 AGGGACGGGACGCGGTGCAT       | miRNA | miR-92b*    |
| t0025356 | 22 | 12 TATTGCACTTGTACAGCCCTGT     | miRNA | miR-92a     |
| t0025609 | 22 | 12 TGGAGAGAAAGGAAGTTCATGA     | miRNA | miR-765     |
| t0025054 | 25 | 12 AGGGCGCGCGGGTCGGGGCGGCGGA  | miRNA | miR-638     |
| t0025218 | 24 | 12 GAGGGCGCGCGGGTCGGGGCGGCG   | miRNA | miR-638     |
| t0025379 | 21 | 12 AGGGCGCGCGGGTCGGGGCGG      | miRNA | miR-638     |
| t0025551 | 26 | 12 AGGGCGCGCGGGTCGGGGCGGCGGCG | miRNA | miR-638     |
| t0025094 | 20 | 12 TCTAGTAAGAGTGGCAGGCG       | miRNA | miR-628-3p  |
| t0025290 | 21 | 12 GACTATAGAACTTTTCCCCTT      | miRNA | miR-625*    |
| t0025547 | 18 | 12 CAAAAGTGATCGTGGTTG         | miRNA | miR-548t    |
| t0025595 | 23 | 12 TCCTGTGCTGAGCTGCCCCGAGA    | miRNA | miR-486-5p  |
| t0026006 | 22 | 12 TCCTGTAAGTACTGAGCTGCCCCGCA | miRNA | miR-486-5p  |
| t0026290 | 22 | 12 CCTGTAAGTACTGAGCTGCCCCGAGT | miRNA | miR-486-5p  |
| t0025977 | 21 | 12 TCCTGTAAGTACTGAGCTGCCCCGCA | miRNA | miR-486-5p  |
| t0025756 | 23 | 12 TCCTGCAACTGAGCTGCCCCGAGA   | miRNA | miR-486-5p  |
| t0025844 | 22 | 12 TCCTGTATTGAGCTGCCCCCTAG    | miRNA | miR-486-5p  |
| t0025636 | 20 | 12 GATGTAGGATTGTGTCGGCA       | miRNA | miR-4860    |
| t0025984 | 23 | 12 TGTAGAGCAGGGGGCAGGAAGCT    | miRNA | miR-4732-5p |
| t0026143 | 20 | 12 AGAGAAGGGTTCGGGGCGGTT      | miRNA | miR-4516    |
| t0026213 | 25 | 12 AATTCGTTACCATTACTGAGTTTAG  | miRNA | miR-451     |
| t0025885 | 20 | 12 AAACCGTTACCCTTACTGAG       | miRNA | miR-451     |
| t0025905 | 20 | 12 AAACCGTTACCATTGCTGAG       | miRNA | miR-451     |

|          |    |                                |       |              |
|----------|----|--------------------------------|-------|--------------|
| t0025896 | 21 | 12 AAACGTTACCATTACTGAGTT       | miRNA | miR-451      |
| t0025728 | 21 | 12 AACCCGTTACCATTACTGAGT       | miRNA | miR-451      |
| t0025944 | 20 | 12 GGGTGC GGCCGGCGGGGTC        | miRNA | miR-4466     |
| t0025955 | 21 | 12 TCGTATCCGAGTCACGGCACC       | miRNA | miR-4454     |
| t0026007 | 21 | 12 GCAGGACAGGCAGAAGTGGAT       | miRNA | miR-4436a    |
| t0026009 | 21 | 12 AACAGCATTGTACAGGGCTAT       | miRNA | miR-4289     |
| t0026122 | 20 | 12 CAGCAGCAATTCATGTTTGA        | miRNA | miR-424      |
| t0025725 | 22 | 12 TGAGGCGCAGAGAGCGAGACTT      | miRNA | miR-423-5p   |
| t0025748 | 22 | 12 TGAGGGGCAGAGAGCGAGTCTT      | miRNA | miR-423-5p   |
| t0026114 | 23 | 12 TGAGGGGCAGAGAGCGAGACATT     | miRNA | miR-423-5p   |
| t0025641 | 26 | 12 TGAGGGGCAGAGAGCGAGACTTTTCT  | miRNA | miR-423-5p   |
| t0025811 | 21 | 12 TGAGGGGCAGAGAGCGAAACT       | miRNA | miR-423-5p   |
| t0025914 | 20 | 12 TGAGTGGCAGAGAGCGAGAC        | miRNA | miR-423-5p   |
| t0026044 | 26 | 12 ACTGGACTTGGAGTCAGAAGGCAATC  | miRNA | miR-378      |
| t0026188 | 22 | 12 TGAGGATGGATAGCAAGGAAGA      | miRNA | miR-3605-5p  |
| t0026246 | 27 | 12 AACTTTGAAGACTGAAGGGGAGAAGGG | miRNA | miR-3526     |
| t0025664 | 23 | 12 TGAAGACTGAAGTGGAGCAGGGT     | miRNA | miR-3526     |
| t0025642 | 23 | 12 GAAGACTGAAGTGGAGAAGGGGT     | miRNA | miR-3526     |
| t0025730 | 22 | 12 AAAAAGCTGGGTTGAGAGGGCGT     | miRNA | miR-320d     |
| t0025881 | 22 | 12 AAAAGCTGGGATGAGAGGGCGT      | miRNA | miR-320d     |
| t0025686 | 22 | 12 AAAAGCTGGGTTGCGAGGGCGT      | miRNA | miR-320d     |
| t0025692 | 22 | 12 AAAAGCTGGGTTGAGAGGACGT      | miRNA | miR-320d     |
| t0025856 | 23 | 12 TGTGGAAGGTAGACGGCCAGAGA     | miRNA | miR-3190     |
| t0025998 | 22 | 12 TAGCACCATCTGAAATCGGTTT      | miRNA | miR-29a      |
| t0026156 | 18 | 12 TTCAAGTAATTCAGGATA          | miRNA | miR-26b      |
| t0026261 | 22 | 12 TGAGGGAGGAGGTTGTGTGGTT      | miRNA | miR-265      |
| t0026233 | 21 | 12 CATCGCACTTGTCTCGGTCTG       | miRNA | miR-25       |
| t0025789 | 21 | 12 CATTGCACTTATCTCGGTCTG       | miRNA | miR-25       |
| t0025976 | 23 | 12 TTGGGTTCTGGCATGCTGATTT      | miRNA | miR-23b*     |
| t0025991 | 18 | 12 ATCACATTGCCAGGATTT          | miRNA | miR-23a      |
| t0026203 | 20 | 12 AAGCTGCCAGTTGAAGAATT        | miRNA | miR-22-3p    |
| t0025676 | 23 | 12 AACCTGGCATAACAATGTAGATTT    | miRNA | miR-221*     |
| t0025778 | 21 | 12 TGACTGGGGCGGCACATCTGT       | miRNA | miR-219-2-3p |
| t0025975 | 18 | 12 TGAGGTAGTATGTATAGT          | miRNA | miR-1961     |
| t0026035 | 22 | 12 AACGGAATCCCAAAAGAAGCTG      | miRNA | miR-191      |
| t0026172 | 22 | 12 CAAAGGAATCCCAAAAGCAGCT      | miRNA | miR-191      |
| t0025747 | 24 | 12 CAACGGAATCCCAAAAGAAGCTGA    | miRNA | miR-191      |
| t0026019 | 21 | 12 AACGGAATCCCAAAAGCCGCT       | miRNA | miR-191      |
| t0025719 | 21 | 12 CGGCGGGGACGGCGATTGGTC       | miRNA | miR-1908     |
| t0025947 | 21 | 12 TGATATGTTTGATATATTAGG       | miRNA | miR-190      |
| t0025956 | 23 | 12 TGGAGAGAAAGGCAGTTCCTAAA     | miRNA | miR-185      |
| t0026164 | 23 | 12 TGGGGAGAAAGGCAGTTCCTGAT     | miRNA | miR-185      |
| t0025957 | 23 | 12 TGGAGAGAAAGGGAGTTCCTGAT     | miRNA | miR-185      |
| t0025776 | 23 | 12 TGGAGAGAGAGGCAGTTCCTGAA     | miRNA | miR-185      |
| t0026077 | 23 | 12 TGGAGCGAAAGGCAGTTCCTGAA     | miRNA | miR-185      |
| t0026103 | 23 | 12 AAAGGTAGATAGAACAGGTTTTG     | miRNA | miR-1839     |
| t0025784 | 20 | 12 AACATTCATTGCTGTCGGTT        | miRNA | miR-181b     |
| t0025665 | 23 | 12 TCGGGGCGGCGGCGGCGGGG        | miRNA | miR-1777a    |
| t0026046 | 18 | 12 ACTGCAGTGAAGGCACTT          | miRNA | miR-17*      |
| t0026090 | 18 | 12 AAGCGGCGATGGCGGAGC          | miRNA | miR-1636     |
| t0026228 | 27 | 12 TAGCAGCACGTAATATTGGCGAAAAA  | miRNA | miR-16       |
| t0026068 | 20 | 12 TAGCAGCAAGTAAATATTGG        | miRNA | miR-16       |
| t0026130 | 20 | 12 TAGCAGCATGTAATATTGG         | miRNA | miR-16       |
| t0025882 | 20 | 12 TAGCAGCGGTAATATTGG          | miRNA | miR-16       |
| t0025963 | 26 | 12 TAGCAGCACGTAATATTGGCGGAAA   | miRNA | miR-16       |
| t0026265 | 23 | 12 TAGCAGCACGTAATATTGGCGG      | miRNA | miR-16       |
| t0026267 | 21 | 12 ATAGCAGCACGTAATATTGG        | miRNA | miR-16       |
| t0026286 | 24 | 12 TAGCAGCACGTAATATTGGTGTA     | miRNA | miR-16       |

|          |    |                                  |       |             |
|----------|----|----------------------------------|-------|-------------|
| t0026198 | 22 | 12 TAGCAGCACATCATGGCTTACA        | miRNA | miR-15b     |
| t0025860 | 20 | 12 TAGCCGCACATCATGGTTTA          | miRNA | miR-15b     |
| t0026273 | 20 | 12 TAGCACCACATCATGGTTTA          | miRNA | miR-15b     |
| t0025899 | 19 | 12 TAGCCGCACATCATGGTTT           | miRNA | miR-15b     |
| t0026291 | 19 | 12 TAGCAGCACCTCATGGTTT           | miRNA | miR-15b     |
| t0025673 | 21 | 12 TAGCAGCACATCATGGTTACC         | miRNA | miR-15b     |
| t0025741 | 19 | 12 TAGCAGCACATCATGGATT           | miRNA | miR-15b     |
| t0025775 | 19 | 12 TAGCAGCACATCACGGTTT           | miRNA | miR-15b     |
| t0025816 | 20 | 12 TAGCATCACATCATGGTTTA          | miRNA | miR-15b     |
| t0025827 | 18 | 12 TAGCAGCACAATATGGTT            | miRNA | miR-15b     |
| t0025961 | 22 | 12 TAGCAGCACACCATGGTTTACA        | miRNA | miR-15b     |
| t0026111 | 18 | 12 GCAGCACATAATGGTTTG            | miRNA | miR-15a     |
| t0026146 | 20 | 12 TAGCAGCACATAATGGTTTC          | miRNA | miR-15a     |
| t0025707 | 21 | 12 CAGCAGCACATAATGGTTTGT         | miRNA | miR-15a     |
| t0025713 | 20 | 12 TAGCAGCACATAATGATTTG          | miRNA | miR-15a     |
| t0025734 | 22 | 12 TAGCAGCACATAATGTTTTGTG        | miRNA | miR-15a     |
| t0025796 | 20 | 12 TAGCAGCACATAATAGTTTG          | miRNA | miR-15a     |
| t0025824 | 23 | 12 TCAGTGCATCACAGAACTTTGTT       | miRNA | miR-148b-3p |
| t0025840 | 20 | 12 TACAGTATAGATGATGTCCT          | miRNA | miR-144     |
| t0025931 | 23 | 12 TTAGATGAAGCACTGTAGCTATC       | miRNA | miR-143     |
| t0025939 | 20 | 12 CATAAAGTAGAAAGCATTAC          | miRNA | miR-142-5p  |
| t0025965 | 20 | 12 CCCATAAAGTATAAAGCACT          | miRNA | miR-142     |
| t0026214 | 22 | 12 ACCACGGGGTAGAACCACGGAT        | miRNA | miR-140     |
| t0026281 | 23 | 12 TACCACAGGGTAAAACCACGGAA       | miRNA | miR-140     |
| t0025651 | 23 | 12 ACCACAGGGAAGAACCACGGACA       | miRNA | miR-140     |
| t0025685 | 22 | 12 ACCACAGGGTAGAACCACAGAT        | miRNA | miR-140     |
| t0025799 | 26 | 12 TACCACAGGGTAGAACCACGGAATTT    | miRNA | miR-140     |
| t0026195 | 22 | 12 ACCACAGGGTAGAACCAAGGAT        | miRNA | miR-140     |
| t0026264 | 24 | 12 TACCACAGGGTAGAGCCACGGACA      | miRNA | miR-140     |
| t0026275 | 21 | 12 AGCACAGGGTAGAACCACGGA         | miRNA | miR-140     |
| t0025722 | 23 | 12 TACCACAGAGTAGAACCACGGAA       | miRNA | miR-140     |
| t0026197 | 23 | 12 TACCAAAGGGTAGAACCACGGAC       | miRNA | miR-140     |
| t0026012 | 23 | 12 TACAACAGGGTAGAACCACGGAT       | miRNA | miR-140     |
| t0026082 | 23 | 12 TACCACAGGATAGAACCACGGAA       | miRNA | miR-140     |
| t0025731 | 23 | 12 TACCATAGGGTAGAACCACGGAT       | miRNA | miR-140     |
| t0025643 | 24 | 12 TACCACAGGGTAGAACCAAGGACG      | miRNA | miR-140     |
| t0025693 | 22 | 12 CAGTGCAATGTAAAAGGGCCT         | miRNA | miR-130a    |
| t0025777 | 20 | 12 AGAGGCAGAGGTTGCAGTGG          | miRNA | miR-1273f   |
| t0025916 | 22 | 12 AGCAGCATTGTACAGGGCTATC        | miRNA | miR-107     |
| t0025986 | 23 | 12 AGCAGCATTGTACAGGACTATGA       | miRNA | miR-103a    |
| t0026001 | 21 | 12 TACAGTACTGTGAAAAGTAA          | miRNA | miR-101     |
| t0026137 | 28 | 12 GTACAGTACTGTGATAACTGAACGGGCT  | miRNA | miR-101     |
| t0026148 | 28 | 12 TACAGTACTGTGATAACTGAAGCGGTTCG | miRNA | miR-101     |
| t0026150 | 22 | 12 GTACAGTACTGTGATAACTGGA        | miRNA | miR-101     |
| t0026155 | 23 | 12 TTAGGTAGTAGTTTGTGCTGTTT       | miRNA | let-7i      |
| t0026170 | 23 | 12 TGAGGGAGTAGTTTGTGCTGTTT       | miRNA | let-7i      |
| t0026176 | 22 | 12 TGAGGTAGTAGTTTGTTCAGTT        | miRNA | let-7g      |
| t0026219 | 19 | 12 TGAGGTAGTAGATTTTATA           | miRNA | let-7f      |
| t0026225 | 18 | 12 TGAGGTAGTAGATTTTAG            | miRNA | let-7f      |
| t0026266 | 23 | 12 TAAGGTAGTAGATTGTATAGTTA       | miRNA | let-7f      |
| t0026238 | 26 | 12 TGAGGTAGTAGATTGTATAGTTGATC    | miRNA | let-7f      |
| t0026106 | 20 | 12 TGAGGTAGTATATTGTATAG          | miRNA | let-7f      |
| t0025663 | 24 | 12 TGAGGTAGTAGATTGTATAGTTTA      | miRNA | let-7f      |
| t0025805 | 19 | 12 TGAGGTAGTAGATCGTATA           | miRNA | let-7f      |
| t0025945 | 19 | 12 TGAGGTAGTAGATTGCATA           | miRNA | let-7f      |
| t0025972 | 23 | 12 CGAGGTAGTAGATTGTATAGTTG       | miRNA | let-7f      |
| t0026161 | 22 | 12 AGAGGTAGTATGTTGCATAGTT        | miRNA | let-7d      |
| t0025830 | 21 | 12 AGAGGTAGTAGGTTGCCTAGT         | miRNA | let-7d      |

|          |    |    |                                |       |             |
|----------|----|----|--------------------------------|-------|-------------|
| t0026282 | 20 | 12 | AGGGGTAGTAGGTTGCATAG           | miRNA | let-7d      |
| t0025880 | 20 | 12 | AGAGGTAGTACGTTGCATAG           | miRNA | let-7d      |
| t0025680 | 20 | 12 | AGAGGTAGTAGGTTGCCTAG           | miRNA | let-7d      |
| t0025704 | 22 | 12 | AGAGGTAGTAGGTTGCATAGTC         | miRNA | let-7d      |
| t0025868 | 22 | 12 | AAAGGTAGTAGGTTGCATAGTT         | miRNA | let-7d      |
| t0025979 | 22 | 12 | AGAGGTAGAAGGTTGCATAGTT         | miRNA | let-7d      |
| t0026027 | 22 | 12 | TGAGGTAGTAGGTTGTACGGTT         | miRNA | let-7c      |
| t0026049 | 21 | 12 | TGAGGTAGTAGCTTGTGTGGT          | miRNA | let-7b      |
| t0026064 | 22 | 12 | TGAGGTAGTAGGTTGTGTGGCA         | miRNA | let-7b      |
| t0026076 | 20 | 12 | TGAGGTAGTAGGTTATGTGG           | miRNA | let-7b      |
| t0026280 | 20 | 12 | TGAGGTAGTAGATTGTGTGG           | miRNA | let-7b      |
| t0025656 | 25 | 12 | TGAGGTAGTGGGTTGTGTGGTTATC      | miRNA | let-7b      |
| t0025708 | 22 | 12 | GAGGTAGTAGGTTGTATAGTTG         | miRNA | let-7       |
| t0025813 | 19 | 12 | TGAGGTAGTAGGTTGGTTA            | miRNA | let-7       |
| t0025845 | 18 | 12 | TGAGGTAGTAGGTGGTAT             | miRNA | let-7       |
| t0025867 | 20 | 12 | TGAGGTAGAAGGTTGTATAG           | miRNA | let-7       |
| t0025934 | 22 | 11 | TATACAACTTACTACTTTCTTT         | miRNA | miR-98*     |
| t0026097 | 23 | 11 | CAAAGTGCTGTTCTGTCAGGTTCG       | miRNA | miR-93      |
| t0026136 | 26 | 11 | AGGGCGCGTGGGTCGGGGCGGCGGCC     | miRNA | miR-638     |
| t0025780 | 21 | 11 | TTCTAGTAAGAGTGGCAGGCG          | miRNA | miR-628-3p  |
| t0025791 | 22 | 11 | TCTGGGCACAGGCGGATGTACA         | miRNA | miR-5107    |
| t0025836 | 22 | 11 | TCCTGGACTGAGCTGCCCCGAG         | miRNA | miR-486-5p  |
| t0025887 | 22 | 11 | TCCTGAACTGAGCTGCCCCGAG         | miRNA | miR-486-5p  |
| t0025941 | 21 | 11 | TCCTGTACTGAGCTGCCGCGA          | miRNA | miR-486-5p  |
| t0025994 | 25 | 11 | TCCTGTACTGAGCTGCCCCGAGATA      | miRNA | miR-486-5p  |
| t0025724 | 21 | 11 | TCCTGTACTGAGGTGCCCCGA          | miRNA | miR-486-5p  |
| t0025823 | 20 | 11 | TCCTGTACTGAGCAGCCCCG           | miRNA | miR-486-5p  |
| t0025915 | 22 | 11 | GCCTGTACTGAGCTGCCCCGAG         | miRNA | miR-486-5p  |
| t0026032 | 28 | 11 | TCCTGTACTGAGCTGCCCCGAGCAGATT   | miRNA | miR-486-5p  |
| t0026689 | 22 | 11 | CGGGGCAGCTCAGTACAGGATT         | miRNA | miR-486-3p  |
| t0026620 | 21 | 11 | TGTAGAGCAGGGAGAAGGAAG          | miRNA | miR-4732-5p |
| t0026691 | 20 | 11 | AGGGCTGGGTCCGGTCGGGCT          | miRNA | miR-4651    |
| t0026602 | 28 | 11 | AAGGGCTGGGTCCGGTCCGGGCTGGGGCGC | miRNA | miR-4651    |
| t0026833 | 23 | 11 | GAAGGGTCGGGGCCGGCAGGGGCA       | miRNA | miR-4516    |
| t0026348 | 26 | 11 | GGGAGAAGGGTCGGGGCCGGCAGGGGC    | miRNA | miR-4516    |
| t0026438 | 22 | 11 | AAACCGTAACCATTACTGAGTT         | miRNA | miR-451     |
| t0026478 | 22 | 11 | AAACGGTTACCATTACTGAGTT         | miRNA | miR-451     |
| t0026587 | 23 | 11 | AAACCGTTACCATTACTAAGTTT        | miRNA | miR-451     |
| t0026635 | 22 | 11 | AACCGTTACCATTACTGAGTTC         | miRNA | miR-451     |
| t0026644 | 23 | 11 | AAACCGGTACCATTACTGAGTTT        | miRNA | miR-451     |
| t0026683 | 25 | 11 | AAACCGTTACCATTACCGAGTTTAG      | miRNA | miR-451     |
| t0026729 | 30 | 11 | AAACCGTTACCATTACTGAGTTATACTTAC | miRNA | miR-451     |
| t0026402 | 21 | 11 | TAACCGTTACCATTACTGAGT          | miRNA | miR-451     |
| t0026422 | 21 | 11 | AAAGCGTTACCATTACTGAGT          | miRNA | miR-451     |
| t0026796 | 21 | 11 | GGGTGCGGGCCGGCGGGGTAA          | miRNA | miR-4466    |
| t0026906 | 23 | 11 | AAAAGCTGGGCTGAGAGGGCGTA        | miRNA | miR-4429    |
| t0026429 | 22 | 11 | AGAAGCATTGTACAGGGCTATT         | miRNA | miR-4289    |
| t0026830 | 23 | 11 | TGAGGGGAAGAGAGAGAGACTTT        | miRNA | miR-423-5p  |
| t0026363 | 23 | 11 | TGAGGGGCAGATAGCGATACTTT        | miRNA | miR-423-5p  |
| t0026446 | 21 | 11 | TCAGGGGCAGAGAGCGAGACT          | miRNA | miR-423-5p  |
| t0026543 | 24 | 11 | TGAGGGGCAGAGGGCCGAGACTTTT      | miRNA | miR-423-5p  |
| t0026610 | 22 | 11 | GGAGGGGCAGAGAGCGAGACTT         | miRNA | miR-423-5p  |
| t0026760 | 24 | 11 | TGAGTGGCAGAGAGCGAGACTTTT       | miRNA | miR-423-5p  |
| t0026846 | 22 | 11 | TCAGGTAGTAGTTTGTACAGTT         | miRNA | miR-3962    |
| t0026874 | 21 | 11 | CGAGGTAGTAGTTTGTACAGT          | miRNA | miR-3962    |
| t0026897 | 23 | 11 | ATTGGACTTGGAGTCAGAAAGGCA       | miRNA | miR-378     |
| t0026911 | 22 | 11 | ATATAATACAACCTGCTAAGGG         | miRNA | miR-374     |
| t0026915 | 18 | 11 | ATTGCACGGTATCCATCT             | miRNA | miR-363     |

|          |    |                              |       |             |
|----------|----|------------------------------|-------|-------------|
| t0026510 | 20 | 11 TTTCTCGGCTCCTCGCGGCT      | miRNA | miR-3615    |
| t0026696 | 20 | 11 TGTTGTACTTTTTTTTTTGT      | miRNA | miR-3613-5p |
| t0026317 | 22 | 11 TCCTCGAACTGTTGTGGCCATT    | miRNA | miR-3487    |
| t0026327 | 23 | 11 TCTCACACAGAAATCGCACCCGG   | miRNA | miR-342-3p  |
| t0026377 | 22 | 11 AAAAGCTGGGTTGAGAAGGCGT    | miRNA | miR-320d    |
| t0026604 | 23 | 11 AAAATCTGGGTTGAGAGGGCGTT   | miRNA | miR-320d    |
| t0026754 | 23 | 11 GAAAGCTGGGTTGAGAGGGCGTA   | miRNA | miR-320d    |
| t0026817 | 23 | 11 AAAAGCTGGGTTGAGAGGGTGAT   | miRNA | miR-320d    |
| t0026321 | 22 | 11 AAAAGCTGGGTCGAGAGGGCGT    | miRNA | miR-320d    |
| t0026492 | 22 | 11 AAAAGCTAGGTTGAGAGGGCGT    | miRNA | miR-320d    |
| t0026798 | 23 | 11 AAACGCTGGGTTGAGAGGGCGAA   | miRNA | miR-320a    |
| t0026418 | 23 | 11 AAAAGCCGGGTTGAGAGGGCGAA   | miRNA | miR-320a    |
| t0026896 | 23 | 11 AAAAGCTGGGTTGCGAGGGCGAA   | miRNA | miR-320a    |
| t0026415 | 21 | 11 TTCAAGTAATTCAGGATAGGG     | miRNA | miR-26b     |
| t0026297 | 20 | 11 TCAAGTAATCCAGGATAGGT      | miRNA | miR-26a     |
| t0026795 | 21 | 11 CATTGCCCTTGTCTCGGTCTG     | miRNA | miR-25      |
| t0026747 | 24 | 11 TGTCAGTTTGTCAAATACCCCTAT  | miRNA | miR-223     |
| t0026385 | 23 | 11 GGGGAAACGGCCGCTGAGTGAGA   | miRNA | miR-2110    |
| t0026442 | 20 | 11 TAGCTTATCAGACTGATTTG      | miRNA | miR-21      |
| t0026588 | 22 | 11 TCTACTGTAGTATGGGCACTTT    | miRNA | miR-20b*    |
| t0026662 | 23 | 11 CTGACCTATGAATTGACAGCCAG   | miRNA | miR-192     |
| t0026758 | 23 | 11 TGACCTATGAATTGACAGCCCGA   | miRNA | miR-192     |
| t0026811 | 22 | 11 CAACGGAATCCAAAAGCACCT     | miRNA | miR-191     |
| t0026355 | 21 | 11 TGGAGAGAAAGGCAGTTCGG      | miRNA | miR-185     |
| t0026467 | 21 | 11 TGGAGAGTAAGGCAGTTCCTG     | miRNA | miR-185     |
| t0026522 | 21 | 11 TGGAGAGACAGGCAGTTCCTG     | miRNA | miR-185     |
| t0026732 | 21 | 11 TGGAGAGAAATGCAGTTCCTG     | miRNA | miR-185     |
| t0026512 | 23 | 11 TGGAGAGAAAGGTAGTTCCTGAT   | miRNA | miR-185     |
| t0026715 | 20 | 11 TGTAGAGAAAGGCAGTTCCT      | miRNA | miR-185     |
| t0026548 | 20 | 11 TGGAGAGAAAGGTAGTTCCT      | miRNA | miR-185     |
| t0026668 | 23 | 11 AGGAGAGAAAGGCAGTTCCTGAA   | miRNA | miR-185     |
| t0026601 | 23 | 11 TGGAGAGAAACGCAGTTCCTGAA   | miRNA | miR-185     |
| t0026441 | 23 | 11 TGGAGAGAAAGGCAGTCCCTGAA   | miRNA | miR-185     |
| t0026437 | 21 | 11 AAAGGTAGATAGAACAGGTCT     | miRNA | miR-1839    |
| t0026806 | 22 | 11 TTTGGCAATGGTAGAACTCACC    | miRNA | miR-182     |
| t0026303 | 24 | 11 TAGCATGTAATATTGGCGAAAAA   | miRNA | miR-16c     |
| t0026301 | 20 | 11 AAGCGGCGATGGCGGAGCTA      | miRNA | miR-1636    |
| t0026305 | 21 | 11 GAAGCGGCGATGGCGGAGCTG     | miRNA | miR-1636    |
| t0026494 | 23 | 11 AAGCGGCGATGGCGGAGCTGAAA   | miRNA | miR-1636    |
| t0026502 | 26 | 11 TAGCAGCACGTAATATTGGCGTAGC | miRNA | miR-16      |
| t0026545 | 22 | 11 TAGCATTACGTAATATTGGCG     | miRNA | miR-16      |
| t0026627 | 22 | 11 TAGCAGCAAGTAATATTGGAG     | miRNA | miR-16      |
| t0026705 | 20 | 11 TAGCAGCACGTAACATTGG       | miRNA | miR-16      |
| t0026708 | 22 | 11 TGGCAGCACATCATGGTTTACA    | miRNA | miR-15b     |
| t0026727 | 22 | 11 CAGCAGCACATCATGGTTTACA    | miRNA | miR-15b     |
| t0026740 | 19 | 11 TAGCAGCACATCATGGCTT       | miRNA | miR-15b     |
| t0026607 | 21 | 11 TAGTAGCACATAATGGTTTGT     | miRNA | miR-15a     |
| t0026430 | 21 | 11 TAGCAGCACATAACGGTTTGT     | miRNA | miR-15a     |
| t0026803 | 21 | 11 TAGCAGCACGTAATGGTTTGT     | miRNA | miR-15a     |
| t0026485 | 21 | 11 TAGCAGCACATAATAGTTTGT     | miRNA | miR-15a     |
| t0026781 | 22 | 11 TCAGTGCATCATAGAACTTTGT    | miRNA | miR-148b-3p |
| t0026860 | 21 | 11 CTACAGTATAGATGATGTA AAA   | miRNA | miR-144     |
| t0026533 | 19 | 11 ATAAAGTAGAAAGCACTAA       | miRNA | miR-142-5p  |
| t0026544 | 21 | 11 CCCATAAAGTAGAAAGCCCTA     | miRNA | miR-142     |
| t0026550 | 22 | 11 TACCACAGGGTAGAAGCACGGA    | miRNA | miR-140     |
| t0026839 | 22 | 11 ACCACAGGGTAGAACCACGGAA    | miRNA | miR-140     |
| t0026399 | 24 | 11 TACCACAGAGTAGAACCACGGACA  | miRNA | miR-140     |
| t0026406 | 24 | 11 TACCACAGGGTAGAACCACGGACA  | miRNA | miR-140     |

|          |    |                                |       |             |
|----------|----|--------------------------------|-------|-------------|
| t0026651 | 20 | 11 ACCACAGGGTAGAACAACGG        | miRNA | miR-140     |
| t0026612 | 22 | 11 ACCACAGTGTAGAACCACGGAT      | miRNA | miR-140     |
| t0026647 | 20 | 11 CCACAGGGTAGAACCACGGT        | miRNA | miR-140     |
| t0026768 | 24 | 11 TACCACAGGGTAGAAACAAGGACA    | miRNA | miR-140     |
| t0026920 | 20 | 11 ACCACAGGGTAGAAACACGG        | miRNA | miR-140     |
| t0026404 | 22 | 11 ACCACAGGGTGAACCACGGAC       | miRNA | miR-140     |
| t0026589 | 21 | 11 TACCACAGGGTAGAAACACGG       | miRNA | miR-140     |
| t0026360 | 22 | 11 TACCACAGGGTAGAACCCCGGT      | miRNA | miR-140     |
| t0026787 | 24 | 11 TACCACAGGGTAGAACCCCGGACT    | miRNA | miR-140     |
| t0026351 | 23 | 11 TACCCAGGGTAGAACACGGAC       | miRNA | miR-140     |
| t0026373 | 24 | 11 TACCACAGGGTAGAACACGGCCT     | miRNA | miR-140     |
| t0026392 | 23 | 11 TAGCACAGGGTAGAACACGGAC      | miRNA | miR-140     |
| t0026398 | 21 | 11 TTCGTGGCTACAGTGAGATGT       | miRNA | miR-1304    |
| t0026409 | 21 | 11 CCCCCCACCCCTCTCCTGCAG       | miRNA | miR-1224-3p |
| t0026444 | 24 | 11 AGCAGCATTGTACAGGGCTATTAT    | miRNA | miR-107     |
| t0026454 | 26 | 11 TAAAGTGCTGACAGTGCAGATAAAAA  | miRNA | miR-106b    |
| t0026525 | 22 | 11 TAAAGTGCTGACAGTGCCGATA      | miRNA | miR-106b    |
| t0026592 | 21 | 11 AGCAGCATTGTACAGGACTAT       | miRNA | miR-103a    |
| t0026597 | 20 | 11 AGCAGCATTGTACCGGGCTA        | miRNA | miR-103a    |
| t0026774 | 23 | 11 AGCACCATTGTACAGGGCTATGA     | miRNA | miR-103a    |
| t0026845 | 23 | 11 AGGAGCATTGTACAGGGCTATGA     | miRNA | miR-103a    |
| t0026848 | 21 | 11 GCACAGTACTGTGATAACTGA       | miRNA | miR-101c    |
| t0026850 | 21 | 11 TACAGTACTGAGATAACTGAA       | miRNA | miR-101     |
| t0026882 | 22 | 11 GTACAGAACTGTGATAACTGAA      | miRNA | miR-101     |
| t0026910 | 21 | 11 TCCAGTACTGTGATAACTGAA       | miRNA | miR-101     |
| t0026713 | 21 | 11 TAAAGTACTGTGATAACTGAA       | miRNA | miR-101     |
| t0026483 | 20 | 11 TGAGGTAGTAGATTGTTCTT        | miRNA | let-7j      |
| t0026762 | 22 | 11 TGAGGTAGTAGTTTGGGCTGTT      | miRNA | let-7i      |
| t0026335 | 19 | 11 TGAGGTAGTAGTTTCTGCT         | miRNA | let-7i      |
| t0026609 | 19 | 11 TGAGGGAGTAGTTTGTGCT         | miRNA | let-7i      |
| t0026339 | 22 | 11 TGAGGTACTAGTTTGTGCTGTT      | miRNA | let-7i      |
| t0026370 | 22 | 11 TGAGGTAGTAATTTGTACAGTT      | miRNA | let-7g      |
| t0026655 | 21 | 11 TGAGGTAGTAGATTGTATATA       | miRNA | let-7f-5p   |
| t0026869 | 22 | 11 TGAGGTAGTAGATTGTATATCT      | miRNA | let-7f-5p   |
| t0026908 | 19 | 11 TGAGGTAGTGGATTGTATA         | miRNA | let-7f-5p   |
| t0026581 | 19 | 11 GGTAGTAGATTGTATAGTT         | miRNA | let-7f      |
| t0026690 | 23 | 11 TGAGGTGGTAGATTGTATAGTTG     | miRNA | let-7f      |
| t0026837 | 19 | 11 TGCGGTAGTAGATTGTATA         | miRNA | let-7f      |
| t0026913 | 21 | 11 CGAGGTAGTAGATTGGATAGT       | miRNA | let-7f      |
| t0026735 | 23 | 11 TGCGGTAGTAGATTGTATAGTTA     | miRNA | let-7f      |
| t0026353 | 23 | 11 TGAGGTAGGAGATTGTATAGTTA     | miRNA | let-7e      |
| t0026618 | 25 | 11 CTATACGACCTGCTGCCTTTCTATC   | miRNA | let-7d*     |
| t0026757 | 22 | 11 AGAGGTAATAGGTTGCATAGTT      | miRNA | let-7d      |
| t0026829 | 20 | 11 TATACAACCTACTGCCTTTT        | miRNA | let-7b*     |
| t0026856 | 27 | 11 TGAGGTAGTAGGTTGTGTGGTTATATC | miRNA | let-7b      |
| t0026434 | 22 | 11 TGAGGTAGTAGGCTGTGTGGTA      | miRNA | let-7b      |
| t0026912 | 24 | 11 TGAGGTAGTAGGTTGTGCGGTTAA    | miRNA | let-7b      |
| t0026918 | 23 | 11 TGAGGTAGTAGGTTGTGTGGTCT     | miRNA | let-7b      |
| t0026390 | 22 | 11 TGAGGTGGTAGGTTGTGTGGTA      | miRNA | let-7b      |
| t0026530 | 22 | 11 TGGGAGTAGGTTGTGTGGTA        | miRNA | let-7b      |
| t0026672 | 23 | 11 TGAGGTAGTAGGCTGTGTGGTTA     | miRNA | let-7b      |
| t0026738 | 20 | 11 CTATACAATCTACTGTCTTT        | miRNA | let-7a*     |
| t0026884 | 20 | 11 TGAGGTCGTAGGTTGTATAG        | miRNA | let-7       |
| t0026488 | 20 | 11 TGAGGTAATAGGTTGTATAG        | miRNA | let-7       |
| t0026310 | 23 | 11 TGAGGTAGTAGGTTGTATATGTT     | miRNA | let-7       |
| t0026643 | 20 | 11 TGAGGTAGTAGGTTGTAAAG        | miRNA | let-7       |
| t0026381 | 21 | 10 CTATACAACCTACTACTTTTT       | miRNA | miR-98*     |
| t0026304 | 22 | 10 CAAAGTGCTGTTCTGTCAGGTC      | miRNA | miR-93      |

|          |    |                                 |       |             |
|----------|----|---------------------------------|-------|-------------|
| t0026346 | 23 | 10 CAAAGTGCTGTTCTGCAGGGAG       | miRNA | miR-93      |
| t0026523 | 22 | 10 TATTGCACTTGTACCGCCTGT        | miRNA | miR-92a     |
| t0026541 | 18 | 10 GGGAGACTGTGAAGCGGA           | miRNA | miR-920     |
| t0026573 | 20 | 10 GGGAGACTTTGAAGCGGCGT         | miRNA | miR-920     |
| t0026631 | 23 | 10 TATTGCACTCGTCCCGCCTATT       | miRNA | miR-92      |
| t0026919 | 20 | 10 GAAGGCCGAAGTGGAGAAGG         | miRNA | miR-739     |
| t0026843 | 26 | 10 AGGGCGCGCGGGTTCGGGCGGCGGCT   | miRNA | miR-638     |
| t0026329 | 22 | 10 TGGTGCAAAGTAATGGCGGGT        | miRNA | miR-548q    |
| t0026400 | 22 | 10 TGGGCACAGGCGGATGGACAGG       | miRNA | miR-5107    |
| t0026863 | 22 | 10 TCCTGTAGTGAGCTGCCCCGAG       | miRNA | miR-486-5p  |
| t0026864 | 20 | 10 TCCTGTACTGAGCTGCACCG         | miRNA | miR-486-5p  |
| t0027566 | 23 | 10 TCCTGTACCGAGCTGCCCCGAGA      | miRNA | miR-486-5p  |
| t0026922 | 20 | 10 TCCTGTACTGAGCTGCCACG         | miRNA | miR-486-5p  |
| t0027369 | 28 | 10 TCCTGTACTGAGCTGCCCCGAGTATAGT | miRNA | miR-486-5p  |
| t0027135 | 20 | 10 CCTGTACTGAGCTGCCCCGA         | miRNA | miR-486-5p  |
| t0026921 | 29 | 10 TCCTGTACTGAGCTGCCCCGAGACGGCA | miRNA | miR-486-5p  |
| t0026967 | 24 | 10 GTAGGATTGTGTCGGCAGATTTTT     | miRNA | miR-4860    |
| t0027290 | 20 | 10 TTAATTTTTTGTTCGGTCA          | miRNA | miR-4775    |
| t0027405 | 20 | 10 TGAGGGAAGGAGGCTTGGTA         | miRNA | miR-4747-5p |
| t0027242 | 18 | 10 GGGCTGGGTCGGTCGGGC           | miRNA | miR-4651    |
| t0027282 | 20 | 10 AAGCAGCACGTAATATTGG          | miRNA | miR-457b    |
| t0027474 | 22 | 10 AGAGAAGGGTCGGGGCGTTTT        | miRNA | miR-4516    |
| t0026970 | 23 | 10 CGGGGGGAGAAGGGTCGGGGCGG      | miRNA | miR-4516    |
| t0027040 | 23 | 10 TGAGGGAGTAGGTTGTGTGGTAA      | miRNA | miR-4510    |
| t0027260 | 22 | 10 TGAGGGAGTAGGTTGTGCGGTT       | miRNA | miR-4510    |
| t0027274 | 23 | 10 AAGCCGTTACCATTACTGAGTTT      | miRNA | miR-451     |
| t0027397 | 25 | 10 AAACAGTTACCATTACTGAGTTTAG    | miRNA | miR-451     |
| t0027477 | 24 | 10 AACCGTTACCATTACTGAGTTAG      | miRNA | miR-451     |
| t0027577 | 22 | 10 AACCCGTTACCATTACTGAGTT       | miRNA | miR-451     |
| t0027499 | 19 | 10 AAACAGTTACCATTACTGA          | miRNA | miR-451     |
| t0027038 | 22 | 10 CCGTTACCATTACTGAGTTAAA       | miRNA | miR-451     |
| t0027063 | 22 | 10 AAACCGTTACCATTACGGAGTT       | miRNA | miR-451     |
| t0027372 | 21 | 10 TAAACCGTTACCATTACTGAG        | miRNA | miR-451     |
| t0027513 | 25 | 10 AAACCGTTACCATTACTGAGTTAG     | miRNA | miR-451     |
| t0026977 | 21 | 10 AAACCGTAACCATTACTGAGT        | miRNA | miR-451     |
| t0027031 | 22 | 10 AGCGGGGCGGCGGGGTCGGGGT       | miRNA | miR-4466    |
| t0026985 | 22 | 10 GGGTGCGGGCCGCGGGGTCCT        | miRNA | miR-4466    |
| t0027331 | 22 | 10 AGAGGGGCAGAGAGCGAGACTT       | miRNA | miR-423-5p  |
| t0027232 | 18 | 10 TAGGGGCAGAGAGCGAGA           | miRNA | miR-423-5p  |
| t0027305 | 22 | 10 TGTGGGGCAGAGAGCGAGACTT       | miRNA | miR-423-5p  |
| t0027390 | 21 | 10 TGAGGGGAAGAGAGAGAGACT        | miRNA | miR-423-5p  |
| t0027399 | 21 | 10 TGAGGGGCAGAGATCCAGACT        | miRNA | miR-423-5p  |
| t0027432 | 25 | 10 TGAGGGGCAGAGAGCGAGACTTAAA    | miRNA | miR-423-5p  |
| t0027461 | 22 | 10 AGAGGTAGTAGTTTGTACAGTT       | miRNA | miR-3962    |
| t0027507 | 20 | 10 CGGGGTCGGCGGCGACGTTT         | miRNA | miR-3885-5p |
| t0027536 | 25 | 10 CCCCGGCGGCGGCGCCTACTAATC     | miRNA | miR-3885-5p |
| t0027587 | 20 | 10 TGGCGGCGGCGGCGGGGCGG         | miRNA | miR-3885-5p |
| t0027594 | 28 | 10 CGGCGGCGGCGGCGACTCTGGACGCGAC | miRNA | miR-3885-5p |
| t0027093 | 23 | 10 ACTGGACTTGGAGGCAGAAGGCA      | miRNA | miR-378f    |
| t0027570 | 23 | 10 ACTGGACTTGGAGTCAGAAGGAA      | miRNA | miR-378c    |
| t0027129 | 22 | 10 TCTCACACAGAAATCGCAACCG       | miRNA | miR-342-3p  |
| t0027283 | 18 | 10 TTATAAAGCAATGAGACT           | miRNA | miR-340-5p  |
| t0027363 | 22 | 10 GAAAGCTGGGTTGAGAGGGCGT       | miRNA | miR-320d    |
| t0027381 | 22 | 10 AAAAGCTGGGTTGAGAGGGTAT       | miRNA | miR-320d    |
| t0027571 | 22 | 10 AAAAGCTGGGTTGAGAGGGCCT       | miRNA | miR-320d    |
| t0027600 | 22 | 10 ACAAGCTGGGTTGAGAGGGCGT       | miRNA | miR-320d    |
| t0027238 | 22 | 10 AAAAGCTGGGTTGAGTGGGCGT       | miRNA | miR-320d    |
| t0027022 | 22 | 10 AAAAGCTGGGTTGAGAGGGCAC       | miRNA | miR-320d    |



|          |    |                                 |       |              |
|----------|----|---------------------------------|-------|--------------|
| t0027463 | 23 | 10 GAAAGCTGGGTTGAGAGGGCGAT      | miRNA | miR-320a     |
| t0027563 | 23 | 10 AAAAGCTGGGATGAGAGGGCGAA      | miRNA | miR-320a     |
| t0027602 | 23 | 10 AAAAAGCTGGGTTGAGAGGGCGAA     | miRNA | miR-320a     |
| t0026987 | 23 | 10 AAAAGCTGGGTTGAGCGGGCGAT      | miRNA | miR-320a     |
| t0027598 | 23 | 10 AAAGGCTGGGTTGAGAGGGCGAA      | miRNA | miR-320a     |
| t0027311 | 24 | 10 AGAGGCTTTGTGCGGATACGGGTT     | miRNA | miR-3188     |
| t0027054 | 21 | 10 GGCTGGTCCGAGTGCAGTGGT        | miRNA | miR-3135b    |
| t0027070 | 20 | 10 GGCTGGTCCGAGTGCAGTGG         | miRNA | miR-3135b    |
| t0027133 | 22 | 10 TTCAAGTAATCCAGGATAGGCC       | miRNA | miR-26a      |
| t0027280 | 21 | 10 CAAGTAATCCAGGATAGGCTT        | miRNA | miR-26a      |
| t0027438 | 22 | 10 CATTGCACTTGTCTCGGGCTGT       | miRNA | miR-25       |
| t0027578 | 21 | 10 CATTGCACTTGTCTCAGTCTG        | miRNA | miR-25       |
| t0027597 | 22 | 10 CATTGCACCTGTCTCGGTCTGA       | miRNA | miR-25       |
| t0026930 | 21 | 10 TATTGCACTTGTCTCGGTCTG        | miRNA | miR-25       |
| t0026955 | 21 | 10 CATTGCACTTGTATCGGTCTG        | miRNA | miR-25       |
| t0027086 | 22 | 10 CACTGCACTTGTCTCGGTCTGA       | miRNA | miR-25       |
| t0027095 | 22 | 10 CATTGCACTTGTCTGGGTCTGA       | miRNA | miR-25       |
| t0027148 | 21 | 10 CATTGAACTTGTCTCGGTCTG        | miRNA | miR-25       |
| t0027272 | 22 | 10 CATTGCACTTGGCTCGGTCTGA       | miRNA | miR-25       |
| t0027024 | 23 | 10 TGGCTCAGTTCAGCAGGAACAGG      | miRNA | miR-24b      |
| t0027198 | 22 | 10 TCTAAGGGCTGGGTTCGGTCTGGG     | miRNA | miR-2487     |
| t0027156 | 21 | 10 ATCACATTGCCAGGGATTAGA        | miRNA | miR-23b      |
| t0027567 | 24 | 10 ATCACATTGCCAGGGATTCCTTT      | miRNA | miR-23a      |
| t0026961 | 23 | 10 AGCTACATTGTCTGCTGGGTTTT      | miRNA | miR-221      |
| t0027071 | 19 | 10 GGGGCGGTACATCTGTAA           | miRNA | miR-219-2-3p |
| t0027138 | 25 | 10 TTGACTGGGGCGGTACATCTGTAA     | miRNA | miR-219-2-3p |
| t0027203 | 21 | 10 ACTGTAGTATGGGCACTTTTT        | miRNA | miR-20b*     |
| t0027353 | 25 | 10 TTGAATGTAAGAAGTATGTATATC     | miRNA | miR-1a       |
| t0027378 | 20 | 10 TGAGGTAGGTTGTATAGTAA         | miRNA | miR-1961     |
| t0027392 | 22 | 10 CTGACCTATGAATTGACAGCCC       | miRNA | miR-192      |
| t0027503 | 23 | 10 CAACGGAATCCAAAAGCAGCTG       | miRNA | miR-191      |
| t0027526 | 22 | 10 CAACGGAATCCCGAAAGCAGCT       | miRNA | miR-191      |
| t0027266 | 20 | 10 AGGGGCTGGCTTTTCTCTGG         | miRNA | miR-185*     |
| t0027337 | 23 | 10 TGGAGAGAAAGGCAGTACTGAG       | miRNA | miR-185      |
| t0027229 | 23 | 10 TGGAGAGAAAGGCAGATCCTGAA      | miRNA | miR-185      |
| t0027288 | 23 | 10 TGGCGAGAAAGGCAGTTCCTGAA      | miRNA | miR-185      |
| t0027506 | 20 | 10 CGGAGAGAAAGGCAGTTCCT         | miRNA | miR-185      |
| t0027246 | 22 | 10 TGGAGAGAAAGGCAGTTCCTGT       | miRNA | miR-185      |
| t0027490 | 23 | 10 CGGAGAGAAAGGCAGTTCCTGAT      | miRNA | miR-185      |
| t0027014 | 23 | 10 TGGAGAGAACGGCAGTTCCTGAA      | miRNA | miR-185      |
| t0027537 | 23 | 10 TGGAGAGAAAGGCAGTTCCTTAG      | miRNA | miR-185      |
| t0027366 | 23 | 10 TGGAGAGAAAGGCAGTTCGGAA       | miRNA | miR-185      |
| t0027008 | 23 | 10 TGGAGAGAAAGGCAGTTCATGAT      | miRNA | miR-185      |
| t0027428 | 22 | 10 AAGGCAGATAGAACAGGTCTTG       | miRNA | miR-1839     |
| t0027462 | 21 | 10 AGGAAGATAGAACAGGTCTTG        | miRNA | miR-1839     |
| t0027373 | 22 | 10 TGAGGGAGTAGATTGGATAGTT       | miRNA | miR-1827     |
| t0026938 | 22 | 10 TGAGGAAGTAGATTGTATAGTA       | miRNA | miR-1827     |
| t0026939 | 20 | 10 ACATTCATTGCTGTCTCGGTGG       | miRNA | miR-181b     |
| t0027003 | 20 | 10 TCGGGGCGGCGGCGGCGGTG         | miRNA | miR-1777a    |
| t0027047 | 23 | 10 TAGCAGCACGTAATATTGGCTC       | miRNA | miR-16b      |
| t0027141 | 18 | 10 GGGGGCGGGGAGCGGTCCG          | miRNA | miR-1607     |
| t0027190 | 29 | 10 GGGGGCGGGGAGCGGTTCGGGCGGCGGC | miRNA | miR-1607     |
| t0027215 | 21 | 10 TAGCAGCATGTAATATTGGC         | miRNA | miR-16       |
| t0027262 | 20 | 10 TAGCGGCACGTAATATTGG          | miRNA | miR-16       |
| t0027264 | 22 | 10 TAGAAGCAAGTAATATTGGCG        | miRNA | miR-16       |
| t0027320 | 23 | 10 TAGCAGCACGTAATATTGGCGC       | miRNA | miR-16       |
| t0026937 | 22 | 10 TAGCAGCACATCCTGTTTACA        | miRNA | miR-15b      |
| t0027423 | 24 | 10 AATAGCAGCACATCATGGTTTACA     | miRNA | miR-15b      |

|          |    |                                  |       |            |
|----------|----|----------------------------------|-------|------------|
| t0027475 | 22 | 10 TAGCAGCACATCATAGTTTACA        | miRNA | miR-15b    |
| t0027550 | 22 | 10 TAGCAGCACATCATGGTTTCCA        | miRNA | miR-15b    |
| t0027226 | 21 | 10 TAGCAGAACATCATGGTTTAC         | miRNA | miR-15b    |
| t0026951 | 19 | 10 TAGCAGAACATAATGGTTT           | miRNA | miR-15a    |
| t0027187 | 20 | 10 TAGCAGCACATAATGGTCTG          | miRNA | miR-15a    |
| t0027101 | 20 | 10 TAGGAGCACATAATGGTTTG          | miRNA | miR-15a    |
| t0027299 | 20 | 10 CGGCCCGGGCTGCTGCTGTT          | miRNA | miR-1538   |
| t0026925 | 20 | 10 GGATATCATCATATACTCTA          | miRNA | miR-144*   |
| t0027254 | 18 | 10 TACAGTATAGATGATGGA            | miRNA | miR-144    |
| t0027316 | 20 | 10 ATAAAGTAGAAAGCACTACT          | miRNA | miR-142-5p |
| t0027418 | 18 | 10 AGTGTTCCTACTTTATG             | miRNA | miR-142*   |
| t0026972 | 20 | 10 ACCACAGGGTAGAACCAAGG          | miRNA | miR-140    |
| t0027306 | 23 | 10 TACCAAAGGGTAGAACCACGGAA       | miRNA | miR-140    |
| t0027345 | 24 | 10 AACCACAGGGTAGAACCACGGACA      | miRNA | miR-140    |
| t0027511 | 21 | 10 ACCACAGGGTAGAAAAACGGA         | miRNA | miR-140    |
| t0027585 | 22 | 10 ACCACAGGGTAGAGCCACGGAC        | miRNA | miR-140    |
| t0027064 | 23 | 10 TACCACAGGGTAGAACCATGGAT       | miRNA | miR-140    |
| t0027310 | 23 | 10 ACCATAGGGTAGAACCACGGATT       | miRNA | miR-140    |
| t0027387 | 22 | 10 ACAACAGGGTAGAACCACGGAT        | miRNA | miR-140    |
| t0027053 | 24 | 10 TACCACAGGGTAGGACCACGGACA      | miRNA | miR-140    |
| t0026964 | 24 | 10 ACCACAGGGTAGAACCACGGATAT      | miRNA | miR-140    |
| t0027117 | 23 | 10 TAACACAGGGTAGAACCACGGAT       | miRNA | miR-140    |
| t0027243 | 21 | 10 TACACAGGGTAGAACCACGGA         | miRNA | miR-140    |
| t0027558 | 20 | 10 ATCCCACCGCTGCCACCAA           | miRNA | miR-1260b  |
| t0027046 | 20 | 10 GTGGGCGGGGGCAGGTGTGT          | miRNA | miR-1228*  |
| t0027062 | 37 | 10 AGCAGCATTGTACAGGGCTATGACATACT | miRNA | miR-103a   |
| t0027114 | 18 | 10 GCAGCATTGTACAGGGCT            | miRNA | miR-103a   |
| t0027126 | 20 | 10 AGCAGCATTGAACAGGGCTA          | miRNA | miR-103a   |
| t0027171 | 20 | 10 AGCAGCATTGTGCAGGGCTA          | miRNA | miR-103a   |
| t0027217 | 19 | 10 AGCATTGTACAGGGCTATG           | miRNA | miR-103a   |
| t0027309 | 23 | 10 AGCCGCATTGTACAGGGCTATGA       | miRNA | miR-103a   |
| t0027411 | 20 | 10 AGCAGCACTGTACAGGGCTA          | miRNA | miR-103a   |
| t0027429 | 21 | 10 TACAGTACTGTGACAACTGAA         | miRNA | miR-101    |
| t0027433 | 20 | 10 TATAGTACTGTGATAACTGA          | miRNA | miR-101    |
| t0027460 | 21 | 10 GTACAGTACTGCGATAACTGA         | miRNA | miR-101    |
| t0027518 | 21 | 10 GTACGGTACTGTGATAACTGA         | miRNA | miR-101    |
| t0027075 | 20 | 10 TACAGTACTGTGATAACCGA          | miRNA | miR-101    |
| t0027130 | 21 | 10 TACAGTACTGTGATAACTGCA         | miRNA | miR-101    |
| t0026973 | 20 | 10 TAAAGTACTGTGATAACTGA          | miRNA | miR-101    |
| t0027000 | 21 | 10 TGAGGTAGTAGATTGTGCTGT         | miRNA | let-7i     |
| t0027034 | 22 | 10 TGCGGTAGTAGTTTGTGCTGTT        | miRNA | let-7i     |
| t0027267 | 20 | 10 TGAGGTAGGAGTTTGTGCTG          | miRNA | let-7i     |
| t0027383 | 22 | 10 TAAGGTAGTAGTTTGTGCTGTT        | miRNA | let-7i     |
| t0027492 | 22 | 10 TGAGGTAGCAGTTTGTGCTGTT        | miRNA | let-7i     |
| t0027508 | 21 | 10 TGAGGTAGTGGTTTGTACAGT         | miRNA | let-7g     |
| t0027025 | 22 | 10 TGAGGTCGTAGTTTGTACAGTT        | miRNA | let-7g     |
| t0027180 | 23 | 10 TGAGGTAGTGGATTGTATAGTTG       | miRNA | let-7f-5p  |
| t0027258 | 23 | 10 TGAGGTAGTGGATTGTATAGTTA       | miRNA | let-7f-5p  |
| t0027389 | 21 | 10 GAGGAAGTAGATTGTATAGTT         | miRNA | let-7f     |
| t0027401 | 23 | 10 ATTGAGGTAGTAGATTGTATAGT       | miRNA | let-7f     |
| t0027471 | 22 | 10 TGAGGTACTAGATTGTATATTT        | miRNA | let-7f     |
| t0027519 | 23 | 10 TGAGGTAGTAGATTGTATAGCTG       | miRNA | let-7f     |
| t0027021 | 23 | 10 TGAGGTAGTAGACTGTATAGTTG       | miRNA | let-7f     |
| t0027172 | 23 | 10 TGAGGTAGTAGATTGTGTAGTTG       | miRNA | let-7f     |
| t0027223 | 23 | 10 TGAGGTACTAGATTGTATAGTTA       | miRNA | let-7f     |
| t0027249 | 25 | 10 TGAGGTAGTAGATTGTATATTTATC     | miRNA | let-7f     |
| t0027545 | 26 | 10 TGAGGTAGTAGATTGTATAGTTAGTT    | miRNA | let-7f     |
| t0027374 | 19 | 10 TGAGGTAGAAGATTGTATA           | miRNA | let-7f     |

|          |    |                                |       |             |
|----------|----|--------------------------------|-------|-------------|
| t0027391 | 22 | 10 AGAGGTACTAGGTTGCATAGTT      | miRNA | let-7d      |
| t0026993 | 20 | 10 AGAGGTAGTAGGCTGCATAG        | miRNA | let-7d      |
| t0027009 | 21 | 10 AGAGGTGGTAGGTTGCATAGT       | miRNA | let-7d      |
| t0027068 | 21 | 10 AGAGGTAGTAGGATGCATAGT       | miRNA | let-7d      |
| t0027082 | 21 | 10 AGAGGTAGTAGGTTGCATCGT       | miRNA | let-7d      |
| t0027116 | 23 | 10 TGAGGAAGTAGGTTGTGTGGTTT     | miRNA | let-7b      |
| t0027127 | 26 | 10 TGAGGTAGTAGGTTGTGTGGTAAAA   | miRNA | let-7b      |
| t0027179 | 22 | 10 CGAGGTAGTAGGTTGTGTGGTA      | miRNA | let-7b      |
| t0027182 | 23 | 10 TGAGGTAGTAGGTTGTGGGGTTG     | miRNA | let-7b      |
| t0027416 | 23 | 10 TGGGGTAGTAGGTTGTGTGGTTA     | miRNA | let-7b      |
| t0027420 | 19 | 10 TGAGGCAGTAGGTTGTGTG         | miRNA | let-7b      |
| t0027489 | 20 | 10 TGAGGTAGTAGTTTTGTTGT        | miRNA | let-7a      |
| t0027582 | 22 | 9 TATTGCACTTGTCCAGGCCTGT       | miRNA | miR-92a     |
| t0026942 | 23 | 9 TATTGCACTCGTCCCGGCCTCAT      | miRNA | miR-92      |
| t0027270 | 22 | 9 TACGTCATCGTTGTCATCGTCG       | miRNA | miR-598     |
| t0027271 | 21 | 9 AAAACCGCCATTACTTTTGCA        | miRNA | miR-548z    |
| t0027278 | 21 | 9 AAGACTGTAGTTGATGTTAAT        | miRNA | miR-499     |
| t0027527 | 20 | 9 TCCTGTACTGAGATGCCCCG         | miRNA | miR-486-5p  |
| t0027228 | 23 | 9 TACTGTACTGAGCTGCCCCGAGA      | miRNA | miR-486-5p  |
| t0027279 | 21 | 9 CGGGCTGTCCGGAGGGGTCGG        | miRNA | miR-4741    |
| t0027382 | 23 | 9 TGTAGAGAAGGGAGCAGGAAGCT      | miRNA | miR-4732-5p |
| t0027483 | 20 | 9 GGAGAAGGGTCGGGGCGGCA         | miRNA | miR-4516    |
| t0027525 | 24 | 9 TGAGGGAGTAGGTTGTGTGGTTAG     | miRNA | miR-4510    |
| t0027603 | 20 | 9 TGAGGGAGTAGGGTGTATAG         | miRNA | miR-4510    |
| t0027212 | 22 | 9 AAACCGTTTCCATTACTGAGTT       | miRNA | miR-451     |
| t0028063 | 25 | 9 AAACCGTTAACATTACTGAGTTTAG    | miRNA | miR-451     |
| t0028293 | 23 | 9 AAACCGTTACCATTACTGAGTCT      | miRNA | miR-451     |
| t0027753 | 27 | 9 AAACCGTTACCATTACTGAGTTAAAAA  | miRNA | miR-451     |
| t0028300 | 22 | 9 AAACCGTTACCATTACTGAGTG       | miRNA | miR-451     |
| t0027701 | 24 | 9 AAACCGTTACCATTACTGGGTTTA     | miRNA | miR-451     |
| t0027723 | 21 | 9 AGCCGCATTGTACAGGGCTAT        | miRNA | miR-4289    |
| t0028046 | 23 | 9 TGAGGTGCAGAGAGCGAGATTTT      | miRNA | miR-423-5p  |
| t0028029 | 19 | 9 TGAGGGGCAGAGCGCGAGA          | miRNA | miR-423-5p  |
| t0028211 | 20 | 9 TGAGGGGCAGAGAGAGAGAC         | miRNA | miR-423-5p  |
| t0027674 | 23 | 9 TGAGGGGCAGAGAGCGAGACGTT      | miRNA | miR-423-5p  |
| t0027670 | 24 | 9 TGAGGGGCAGAGAGCGAGACTTTT     | miRNA | miR-423-5p  |
| t0028055 | 24 | 9 TGAGGGGCAGAGAGAGAGACTTTT     | miRNA | miR-423-5p  |
| t0027809 | 24 | 9 AAGCTCGGTCTGAGGCCCTCAGT      | miRNA | miR-423-3p  |
| t0027888 | 22 | 9 GGAGGTAGTAGTTTGTACAGTT       | miRNA | miR-3962    |
| t0027936 | 22 | 9 ACTGGACTTGGAGTCAGAAGAA       | miRNA | miR-378c    |
| t0028023 | 22 | 9 ACTGGACTTGGAGTCAGAAGGT       | miRNA | miR-378     |
| t0028069 | 24 | 9 CTGGACTTGGAGTCAGAAGGCTTT     | miRNA | miR-378     |
| t0028073 | 28 | 9 AACTTTGAAGACTGAAGTGGGGAAGGGT | miRNA | miR-3526    |
| t0027883 | 23 | 9 TGAAGACTGAAGGGGAGAAGGGT      | miRNA | miR-3526    |
| t0027664 | 29 | 9 GGCCCGGTAGCTCAGTCGGTAGAGCAGA | miRNA | miR-3488    |
| t0027777 | 23 | 9 TCTCACACAGAAATCGAACCCGT      | miRNA | miR-342-3p  |
| t0027862 | 23 | 9 AAAAGCTGGGTTGAGGGGGCGTA      | miRNA | miR-320d    |
| t0027884 | 22 | 9 AAAAGCTGGGTTGAGAGGGCCA       | miRNA | miR-320d    |
| t0027958 | 23 | 9 AAAAGCTGGGTTGAGAGGGGGAT      | miRNA | miR-320d    |
| t0028303 | 22 | 9 AAAAGCTGGGTTGAGAGGGATT       | miRNA | miR-320d    |
| t0028085 | 21 | 9 AAAGTCGGGTTGAGAGGGCGA        | miRNA | miR-320c    |
| t0027778 | 21 | 9 AAAAGCTGGGTTGAGCGGGCG        | miRNA | miR-320a    |
| t0028043 | 22 | 9 AAAAGCTGGGTAGAGAGGGCGA       | miRNA | miR-320a    |
| t0027897 | 23 | 9 AACAGCTGGGTTGAGAGGGCGAT      | miRNA | miR-320a    |
| t0028093 | 23 | 9 AAAAGCTGGGTTGAAAGGGCGAA      | miRNA | miR-320a    |
| t0027677 | 21 | 9 AATCTGGGTTGAGAGGGCGAT        | miRNA | miR-320a    |
| t0027808 | 23 | 9 AAAAGATGGGTTGAGAGGGCGAT      | miRNA | miR-320a    |
| t0028289 | 22 | 9 GGCTGGTCTGAGTGCAGTGGTG       | miRNA | miR-3135b   |

|          |    |                               |       |              |
|----------|----|-------------------------------|-------|--------------|
| t0027881 | 27 | 9 GGCTGGTCCGAGTGCAGTGGTGTTCCT | miRNA | miR-3135b    |
| t0027716 | 20 | 9 TAGCACCATTTGAAATCGGT        | miRNA | miR-29c      |
| t0027964 | 26 | 9 CGCGCGCGGGTCGGGGGGCGGGGCGG  | miRNA | miR-2981     |
| t0028086 | 31 | 9 CGCGCGCGGGTCGGGGGGCGGGGCGGA | miRNA | miR-2981     |
| t0028094 | 31 | 9 CCGCGCGCGGGTCGGGGGGCGGGGCGG | miRNA | miR-2981     |
| t0027666 | 18 | 9 TCGTTGTCTGGGCGGCGGG         | miRNA | miR-2885     |
| t0027654 | 22 | 9 TTCAAGTAATCCAGGATAAGCT      | miRNA | miR-26a      |
| t0027779 | 22 | 9 TTCAAGTAATACAGGATAGGCT      | miRNA | miR-26a      |
| t0027824 | 21 | 9 CATTGGACTTGTCTCGGTCTG       | miRNA | miR-25       |
| t0027839 | 21 | 9 CATTGCGCTTGTCTCGGTCTG       | miRNA | miR-25       |
| t0028252 | 18 | 9 AAGCTGCCATTTGAAGAA          | miRNA | miR-22-3p    |
| t0028279 | 22 | 9 AGCTACATTGTCTGCTGGGTAT      | miRNA | miR-221      |
| t0027635 | 22 | 9 AGCTACATTGTCTGCTGGGGTT      | miRNA | miR-221      |
| t0027675 | 20 | 9 GACTGGGGCGGCACATCTGT        | miRNA | miR-219-2-3p |
| t0028291 | 21 | 9 GACTGGGGCGGGACATCTGTT       | miRNA | miR-219-2-3p |
| t0027684 | 22 | 9 TTGGGGAAACGGCCGCTGAGGG      | miRNA | miR-2110     |
| t0027830 | 21 | 9 CTGTGCGTGTGACAGCGGCTG       | miRNA | miR-210      |
| t0028274 | 18 | 9 TAGCTTATCAGACTGATG          | miRNA | miR-21       |
| t0028264 | 23 | 9 TGACCTATGAATTGACAGCCCGT     | miRNA | miR-192      |
| t0027631 | 20 | 9 CTGACCTATGAATTGACCGC        | miRNA | miR-192      |
| t0028244 | 23 | 9 CAACGGAATCACA AAAAGCAGCTG   | miRNA | miR-191      |
| t0028048 | 18 | 9 CAACGGAATCCCAAAAAGC         | miRNA | miR-191      |
| t0028299 | 24 | 9 CAACAGAATCCCAAAAAGCAGCTGA   | miRNA | miR-191      |
| t0027947 | 22 | 9 TGGAGAGAAAGGCAGTTAATGA      | miRNA | miR-185      |
| t0027619 | 21 | 9 TGGAGAGTAAGGCACTTCCTG       | miRNA | miR-185      |
| t0028031 | 23 | 9 TGGAGTGAAAGGCAGTTCCTGAA     | miRNA | miR-185      |
| t0027923 | 21 | 9 TGGAGACAAAAGGCAGTTCCTG      | miRNA | miR-185      |
| t0028056 | 23 | 9 TGGAGAGAAAGGCAGTTCCTGGG     | miRNA | miR-185      |
| t0027954 | 25 | 9 TGGAGAGAAAGGCAGTTCCTGAAAC   | miRNA | miR-185      |
| t0027703 | 23 | 9 TGGAGAGAAAGGCAGATCCTGAT     | miRNA | miR-185      |
| t0028221 | 23 | 9 TGGAGAGAAAAGCAGTTCCTGAT     | miRNA | miR-185      |
| t0027823 | 22 | 9 AAGGTAGATAGAACAGGTCTTT      | miRNA | miR-1839     |
| t0028114 | 22 | 9 TGAGTTAGTAGATTGTATACTA      | miRNA | miR-1827     |
| t0027784 | 22 | 9 TGAGGCAGTAGATTGTATAGTA      | miRNA | miR-1827     |
| t0027861 | 20 | 9 GAGGGAGTAGATTGTATAGT        | miRNA | miR-1827     |
| t0028175 | 22 | 9 TGAGGGAGTAGATTGTACAGTT      | miRNA | miR-1827     |
| t0027689 | 22 | 9 TGAGGGGGTAGATTGTATAGTT      | miRNA | miR-1827     |
| t0027806 | 21 | 9 TGAGGGAGTAGATTGTGTAGT       | miRNA | miR-1827     |
| t0027885 | 22 | 9 AACATTCAACGCTGTCGGTGCG      | miRNA | miR-181a     |
| t0027903 | 18 | 9 AACATTCAACGCTGTCGG          | miRNA | miR-181a     |
| t0028030 | 20 | 9 TCGGGGCGGCGGCGGCGTTG        | miRNA | miR-1777a    |
| t0028038 | 21 | 9 AAGCGGCGATGGCGGAGCTCA       | miRNA | miR-1636     |
| t0028131 | 26 | 9 GGGGGCGGGGAGCGGTCGGGCGGCGG  | miRNA | miR-1607     |
| t0028267 | 23 | 9 GGGGGCGGGGAGCGGTCGGGCGG     | miRNA | miR-1607     |
| t0027997 | 18 | 9 TGGGGGCGGGGAGCGGTC          | miRNA | miR-1607     |
| t0027609 | 23 | 9 TAGCAGAACGTAAATATTGGCGT     | miRNA | miR-16       |
| t0027798 | 23 | 9 TAGCAGCACGTAAATATTGGAGT     | miRNA | miR-16       |
| t0027814 | 22 | 9 GCGTAGCAGCACGTAAATATTG      | miRNA | miR-16       |
| t0027821 | 22 | 9 TAGCAGCACGTAAATATTGTAG      | miRNA | miR-16       |
| t0027863 | 23 | 9 TAGCAGCACGCAAATATTGGCGA     | miRNA | miR-16       |
| t0028298 | 20 | 9 TAGCAGCACGTACATATTGG        | miRNA | miR-16       |
| t0027908 | 20 | 9 TAGCAGCACGTAGATATTGG        | miRNA | miR-16       |
| t0027919 | 20 | 9 TAGCAGCATCATGGTTAT          | miRNA | miR-15c      |
| t0027967 | 21 | 9 TAGCAGCATCATGGTTCAC         | miRNA | miR-15b      |
| t0027921 | 23 | 9 TAGCAGCATCATGGTTTAATT       | miRNA | miR-15b      |
| t0027615 | 19 | 9 TAGCAGCATCATAGTTT           | miRNA | miR-15b      |
| t0027775 | 22 | 9 TAGCAGCATCATGGTTTGCA        | miRNA | miR-15b      |
| t0028005 | 19 | 9 TAGCAGCATCCTGGTTT           | miRNA | miR-15b      |

|          |    |                                 |       |            |
|----------|----|---------------------------------|-------|------------|
| t0027818 | 22 | 9 TAACAGCACATCATGGTTTACA        | miRNA | miR-15b    |
| t0027846 | 20 | 9 GAGCAGCACATCATGGTTTA          | miRNA | miR-15b    |
| t0028000 | 22 | 9 AAGCAGCACATCATGGTTTACA        | miRNA | miR-15b    |
| t0028010 | 20 | 9 TAGCAGCACATCTTGGTTTA          | miRNA | miR-15b    |
| t0028109 | 22 | 9 TAGCAGCAACATGGTTTACA          | miRNA | miR-15b    |
| t0028183 | 21 | 9 TAGGAGCACATAATGGTTTGT         | miRNA | miR-15a    |
| t0028292 | 20 | 9 TAGCAGCACATGATGGTTTG          | miRNA | miR-15a    |
| t0027999 | 20 | 9 TAACAGCACATAATGGTTTG          | miRNA | miR-15a    |
| t0027637 | 21 | 9 TAGCAGCACATAATGGTTTCT         | miRNA | miR-15a    |
| t0027933 | 21 | 9 TAGCAGCCCATAATGGTTTGT         | miRNA | miR-15a    |
| t0027951 | 24 | 9 GGATATCATCATATATTGTAAGTT      | miRNA | miR-144*   |
| t0027998 | 21 | 9 ATAAAGTAGAAAGCACTACTA         | miRNA | miR-142-5p |
| t0028116 | 20 | 9 CCCATAAAGGAGAAAGCACT          | miRNA | miR-142    |
| t0028133 | 19 | 9 CCCATAAAGTAGAAAGCAA           | miRNA | miR-142    |
| t0028206 | 22 | 9 ACCACAGGGTAGAACCACGGTC        | miRNA | miR-140    |
| t0028220 | 21 | 9 ACCACAGGGTAGACCCACGGA         | miRNA | miR-140    |
| t0028232 | 23 | 9 TAGCACAGGGTAGAACCACGGAA       | miRNA | miR-140    |
| t0028276 | 22 | 9 ACTACAGGGTAGAACCACGGAA        | miRNA | miR-140    |
| t0027693 | 23 | 9 TACCACAGGGTAGCACCACGGAA       | miRNA | miR-140    |
| t0027721 | 24 | 9 TACCACGGGTAGAACCACGGACA       | miRNA | miR-140    |
| t0027794 | 23 | 9 TACCACAGGCTAGAACCACGGAA       | miRNA | miR-140    |
| t0027870 | 21 | 9 ACCACAGGGTAGAACCAGGGA         | miRNA | miR-140    |
| t0028258 | 22 | 9 TACCACAGGGTTGAACCACGGA        | miRNA | miR-140    |
| t0027944 | 22 | 9 TACCACAGGGTAGTACCACGGA        | miRNA | miR-140    |
| t0027735 | 22 | 9 TACACAGGGTAGAACCACGGAC        | miRNA | miR-140    |
| t0028022 | 23 | 9 TACCACAGGGTAGAACCACCGAA       | miRNA | miR-140    |
| t0028039 | 26 | 9 TACCACAGGGTAGAACCACGGACAGA    | miRNA | miR-140    |
| t0027708 | 24 | 9 ACCACAGGGTAGAACCACGGAAAA      | miRNA | miR-140    |
| t0027715 | 21 | 9 ACCACAGGGTAGAACGACGGA         | miRNA | miR-140    |
| t0027733 | 23 | 9 TACCCAGGGTAGAACCACGGAA        | miRNA | miR-140    |
| t0027740 | 19 | 9 ACAGGGTAGAACCACGGAC           | miRNA | miR-140    |
| t0027756 | 24 | 9 TACCACAGGGAAGAACCACGGACA      | miRNA | miR-140    |
| t0027786 | 24 | 9 TACCTCAGGGTAGAACCACGGACA      | miRNA | miR-140    |
| t0027807 | 23 | 9 TACCACAGGGTAGAACGACGGAA       | miRNA | miR-140    |
| t0027891 | 22 | 9 ACCACAGGGTAGAACCACGGTT        | miRNA | miR-140    |
| t0027909 | 23 | 9 AGCAGCATTGAACAGGGCTATGA       | miRNA | miR-103a   |
| t0027941 | 22 | 9 AGCAGCATTGTAAGGGCTATG         | miRNA | miR-103a   |
| t0027978 | 20 | 9 AGCAGCATTGTCCAGGGCTA          | miRNA | miR-103a   |
| t0028006 | 31 | 9 TACAGTACTGTGATAACTGAAACATAGAC | miRNA | miR-101    |
| t0028047 | 22 | 9 GTACAGTACTGTGATAACTCAA        | miRNA | miR-101    |
| t0028076 | 22 | 9 GTACAGTGCTGTGATAACTGAA        | miRNA | miR-101    |
| t0028110 | 22 | 9 TACAGTTCTGTGATAACTGAAG        | miRNA | miR-101    |
| t0028158 | 21 | 9 TACAGTGCTGTGATAACTGAA         | miRNA | miR-101    |
| t0028181 | 22 | 9 GTAAAGTACTGTGATAACTGAA        | miRNA | miR-101    |
| t0028203 | 21 | 9 TACAGGACTGTGATAACTGAA         | miRNA | miR-101    |
| t0028245 | 22 | 9 TACAGTACTGCGATAACTGAAG        | miRNA | miR-101    |
| t0028254 | 21 | 9 TACAGAAGTGTGATAACTGAA         | miRNA | miR-101    |
| t0028273 | 20 | 9 TACAGTACTGTGATAACTGC          | miRNA | miR-101    |
| t0027627 | 22 | 9 TACAGTACTGTGATAACCGAAG        | miRNA | miR-101    |
| t0027956 | 22 | 9 TGAGGTAGTAGTTTGCCTGTT         | miRNA | let-7i     |
| t0028208 | 22 | 9 TGAGGTAGTAGTTTGTGCTGTT        | miRNA | let-7i     |
| t0027648 | 22 | 9 CGAGGTAGTAGTTTGTGCTGTT        | miRNA | let-7i     |
| t0027697 | 22 | 9 TGAGGTAGTAGTTTGTGCTGTT        | miRNA | let-7i     |
| t0027698 | 22 | 9 TGAGGTAGTAGTTTATGCTGTT        | miRNA | let-7i     |
| t0027736 | 21 | 9 TGAGGTAGTAGTTTGCACAGT         | miRNA | let-7g     |
| t0027774 | 21 | 9 TGAGGTAGTAGTTTGTACAGT         | miRNA | let-7g     |
| t0027875 | 21 | 9 TGAGGTAGTAGTTTGTACAGG         | miRNA | let-7g     |
| t0027989 | 22 | 9 TGAGGTAGTAGATTGTATAGGG        | miRNA | let-7f-5p  |

|          |    |                                                       |       |             |
|----------|----|-------------------------------------------------------|-------|-------------|
| t0028013 | 22 | 9 TGAGGTAGTAGATTGTATAACT                              | miRNA | let-7f-5p   |
| t0028200 | 21 | 9 GAGGTAGTAGATTGTATCGTT                               | miRNA | let-7f      |
| t0028224 | 23 | 9 TGAGGTGGTAGATTGTATAGTTT                             | miRNA | let-7f      |
| t0028249 | 23 | 9 TGCGGTAGTAGATTGTATAGTTG                             | miRNA | let-7f      |
| t0027633 | 19 | 9 TGAGGTAGTATATTGTATA                                 | miRNA | let-7f      |
| t0027959 | 22 | 9 TGAGGTAGTAGATTGTGTTGTT                              | miRNA | let-7f      |
| t0028207 | 23 | 9 TGAGGTAGCAGATTGTATAGTTG                             | miRNA | let-7f      |
| t0028229 | 18 | 9 TGAGGTAGTAGATTGTAA                                  | miRNA | let-7f      |
| t0028297 | 22 | 9 TGAGGTAGTAGATTTGATAGTT                              | miRNA | let-7f      |
| t0027799 | 27 | 9 TGAGGTAGTAGATTGTATAGTTGGCAA                         | miRNA | let-7f      |
| t0027813 | 19 | 9 TGAGGTAGTAGATTATATA                                 | miRNA | let-7f      |
| t0028286 | 23 | 9 TGAGGTAGTAGATTTTATAGTTT                             | miRNA | let-7f      |
| t0027981 | 23 | 9 TGAGGTAGTAGATTGTACAGTTG                             | miRNA | let-7f      |
| t0028155 | 20 | 9 AGAGGTAGCAGGTTGCATAG                                | miRNA | let-7d      |
| t0027620 | 22 | 9 AGAGGTAGTAGGTTGCAAAGTT                              | miRNA | let-7d      |
| t0027653 | 22 | 9 AGAAGTAGTAGGTTGCATAGTT                              | miRNA | let-7d      |
| t0027705 | 20 | 9 AGAGGTAGGAGGTTGCATAG                                | miRNA | let-7d      |
| t0027722 | 22 | 9 AGAGGTAGTCGTTGCATAGTT                               | miRNA | let-7d      |
| t0027792 | 21 | 9 AGAGGTAGTAGGTTGCATGGT                               | miRNA | let-7d      |
| t0027925 | 22 | 9 AGAGGTCGTAGGTTGCATAGTT                              | miRNA | let-7d      |
| t0028027 | 22 | 9 AGAGATAGTAGGTTGCATAGTT                              | miRNA | let-7d      |
| t0028127 | 23 | 9 TGAGGTAGGAGGTTGTGTGGTTA                             | miRNA | let-7b      |
| t0028193 | 20 | 9 TAAGGTAGTAGGTTGTGTGG                                | miRNA | let-7b      |
| t0028201 | 24 | 9 TGAGGTAGTAGGTTGTGTTGTAA                             | miRNA | let-7b      |
| t0028250 | 20 | 9 TGAGGTAGTAGGATGTGTGG                                | miRNA | let-7b      |
| t0028255 | 23 | 9 TGAGGTAGTAGGTTGTGTGGTCA                             | miRNA | let-7b      |
| t0027625 | 23 | 9 TGAGGTAGTGGGTTGTGTGGTTA                             | miRNA | let-7b      |
| t0027731 | 20 | 9 TGAGGTAGGAGGTTGTGTGG                                | miRNA | let-7b      |
| t0027910 | 22 | 9 TAAGGTAGTAGGTTGTGTGGTA                              | miRNA | let-7b      |
| t0027965 | 22 | 9 GAGGTAGTAGGTTGTATAGTTT                              | miRNA | let-7       |
| t0028165 | 20 | 9 TGAAGTAGTAGGTTGTATAG                                | miRNA | let-7       |
| t0028269 | 24 | 8 TCCAGGTGGAAGGTTGTAGGCATG                            | miRNA | miR-965-5p  |
| t0028281 | 22 | 8 TATTGTA CTTGTCCCGCCTGT                              | miRNA | miR-92d     |
| t0028296 | 22 | 8 TATTGCACTTGTCCCGCCTGC                               | miRNA | miR-92b-3p  |
| t0027710 | 22 | 8 TATTGCACTTGTCCCGCCTGT                               | miRNA | miR-92a     |
| t0027766 | 21 | 8 TATTGCACTTGTCCCGACTG                                | miRNA | miR-92a     |
| t0027773 | 21 | 8 TATTGCATTTGTCCCGCCTG                                | miRNA | miR-92a     |
| t0027847 | 19 | 8 TATTGCACTCGTCCCGGCT                                 | miRNA | miR-92      |
| t0028024 | 22 | 8 AATGGCGCCACTAGGGTTGTGT                              | miRNA | miR-652     |
| t0028066 | 21 | 8 TCCTGAACTGAGCTGCCCCGA                               | miRNA | miR-486-5p  |
| t0028121 | 22 | 8 TCCTGTA C T G A G C T G C A C A G A G               | miRNA | miR-486-5p  |
| t0028242 | 29 | 8 TCCTGTA C T G A G C T G C C C C G A G A C C G G C / | miRNA | miR-486-5p  |
| t0027952 | 24 | 8 TTCCTGTA C T G A G C T G C C C C G A G T            | miRNA | miR-486-5p  |
| t0028209 | 21 | 8 TCCTGTA C T G A G C T G C C C G G A                 | miRNA | miR-486-5p  |
| t0028635 | 22 | 8 TCGTGA C T G A G C T G C C C C G A G                | miRNA | miR-486-5p  |
| t0028323 | 23 | 8 TCCTGT C C T G A G C T G C C C C G A G A            | miRNA | miR-486-5p  |
| t0028368 | 22 | 8 TCCTGT A C T G A G C G G C C C C G A G              | miRNA | miR-486-5p  |
| t0028476 | 23 | 8 TCCTGT A C T G A A C T G C C C C G A G A            | miRNA | miR-486-5p  |
| t0028621 | 22 | 8 TCCTGT A C T G A G C T G A C C A G A G              | miRNA | miR-486-5p  |
| t0028804 | 27 | 8 TTCTGT A C T G A G C T G C C C C G A G A C G G C    | miRNA | miR-486-5p  |
| t0028458 | 23 | 8 TGTA G A G C A G G G A G A A G G A A G C T          | miRNA | miR-4732-5p |
| t0028388 | 21 | 8 TGTA G A G C A G G G C G C A G G A A G              | miRNA | miR-4732-5p |
| t0028355 | 21 | 8 TGTA G A G C A G G G G G C A G G A A G              | miRNA | miR-4732-5p |
| t0028455 | 21 | 8 A A G G G C T G G G T C G G T C G G G C T           | miRNA | miR-4651    |
| t0028490 | 22 | 8 TA G C A A G A G A A C C A T T A C C A T T          | miRNA | miR-451b    |
| t0028554 | 21 | 8 G A G A A G G G T C G G G G C G G C A G G           | miRNA | miR-4516    |
| t0028573 | 19 | 8 G A G A A G G G T C G G G G C G G C A               | miRNA | miR-4516    |
| t0028603 | 24 | 8 A G A A G G G T C G G G G C G G C A G G G G C T     | miRNA | miR-4516    |

|          |    |                                 |       |             |
|----------|----|---------------------------------|-------|-------------|
| t0028824 | 18 | 8 TGAGGGAGTAGGTTGTGT            | miRNA | miR-4510    |
| t0028853 | 20 | 8 AAACCGTTACCATTACTGGT          | miRNA | miR-451     |
| t0028880 | 19 | 8 AAACCGTTACCATTACTTT           | miRNA | miR-451     |
| t0028921 | 29 | 8 AAACCGTTACCATTACTGAGTTTCGTCCG | miRNA | miR-451     |
| t0029030 | 19 | 8 AAACCGTTACAATTACTGA           | miRNA | miR-451     |
| t0028656 | 23 | 8 AAACCGCTACCATTACTTAGTTT       | miRNA | miR-451     |
| t0028844 | 23 | 8 AGACCGTTACCATTACTGAGTTT       | miRNA | miR-451     |
| t0028961 | 20 | 8 AAACCGTTACCATTACTGAT          | miRNA | miR-451     |
| t0028683 | 18 | 8 AATGTTACCATTACTGAG            | miRNA | miR-451     |
| t0028604 | 21 | 8 AAACCGTTACCATTACAGAGT         | miRNA | miR-451     |
| t0028574 | 20 | 8 AAACCGTTACCATTACTGTG          | miRNA | miR-451     |
| t0028867 | 21 | 8 CGACCGGCTCCGGGACGGCTG         | miRNA | miR-4497    |
| t0028949 | 23 | 8 CTCCCACTGCTTCACTTGACTAG       | miRNA | miR-4301    |
| t0028443 | 20 | 8 AGCGGCATTGTACAGGGCTA          | miRNA | miR-4289    |
| t0028312 | 21 | 8 AGGAGCATTGTACAGGGCTAT         | miRNA | miR-4289    |
| t0028329 | 27 | 8 TGAGGGGCAGAGAGCGAGACTTTTATT   | miRNA | miR-423-5p  |
| t0028530 | 23 | 8 TGGGGGGCAGAGAGCGAGACTTA       | miRNA | miR-423-5p  |
| t0028662 | 23 | 8 TGAGAGGCAGAGAGCGAGACTTA       | miRNA | miR-423-5p  |
| t0028712 | 23 | 8 TGAGGGACAGAGAGCGAGACTTA       | miRNA | miR-423-5p  |
| t0028776 | 24 | 8 TGAGGCGCAGAGAGCGAGACTTTT      | miRNA | miR-423-5p  |
| t0028816 | 21 | 8 TGAGAGGCAGAGAGCTAGACT         | miRNA | miR-423-5p  |
| t0028971 | 23 | 8 TGAGGAGCAGAGAGCGAGACTTA       | miRNA | miR-423-5p  |
| t0029018 | 24 | 8 CGAGGGGCAGAGAGCGAGACTTTT      | miRNA | miR-423-5p  |
| t0029021 | 24 | 8 TGAGGGGCAGAGAGCGGGACTTTT      | miRNA | miR-423-5p  |
| t0029034 | 23 | 8 TGAGGGGCAGGGAGCGAGACTTA       | miRNA | miR-423-5p  |
| t0028849 | 20 | 8 TGAGGGGCAGAGAGCGCGAC          | miRNA | miR-423-5p  |
| t0028658 | 19 | 8 TGAGTGGCAGAGAGCGAGA           | miRNA | miR-423-5p  |
| t0028891 | 23 | 8 AGCTCGGTCTGAGGCCCTCATT        | miRNA | miR-423-3p  |
| t0028337 | 21 | 8 TAAGGTAGTAGTTTGTACAGT         | miRNA | miR-3962    |
| t0028353 | 23 | 8 AGAACTGAAACGGACAAGGTGAA       | miRNA | miR-3896-3p |
| t0028451 | 29 | 8 GCCGGCGGCGGCGGCGACTCTGGACGCC  | miRNA | miR-3885-5p |
| t0028536 | 22 | 8 TCGGGGCGGCGGCGGCGGCGGT        | miRNA | miR-3885-5p |
| t0028666 | 30 | 8 GGCCGGCGGCGGCGGCGACTCTGGACGC  | miRNA | miR-3885-5p |
| t0028669 | 24 | 8 CGAGACTTACGTTGCGTCAATTCT      | miRNA | miR-3850-3p |
| t0028706 | 22 | 8 ATATAATACAACCTGCTCAGTG        | miRNA | miR-374     |
| t0028756 | 18 | 8 CGGGGGTGGGGTTCGGCGT           | miRNA | miR-3621    |
| t0028795 | 27 | 8 TGAAGACTGAAGTGGAGAAGGGGTTCT   | miRNA | miR-3526    |
| t0028838 | 23 | 8 TCTCACAAAGAAATCGCACCCGT       | miRNA | miR-342-3p  |
| t0028881 | 23 | 8 TCAAGAGCAATAACGAAAAATGA       | miRNA | miR-335     |
| t0028907 | 22 | 8 AAAACCTGGGTTGAGAGGGCGT        | miRNA | miR-320d    |
| t0028358 | 23 | 8 AAAAGCTGGGTTGAGAGGGTGTA       | miRNA | miR-320d    |
| t0028625 | 23 | 8 AAAAGATGGGTTGAGAGGGCGTA       | miRNA | miR-320d    |
| t0028928 | 23 | 8 AAAAGCTGGGTTGGGAGGGCGTT       | miRNA | miR-320d    |
| t0028417 | 23 | 8 AAAAGCTGGGTTGAGAGGGCGGG       | miRNA | miR-320d    |
| t0028647 | 23 | 8 AAAAGCTGGGTTGAGAGGGAGAG       | miRNA | miR-320d    |
| t0028873 | 23 | 8 AAAAGCTGGGATGAGAGGGCGTA       | miRNA | miR-320d    |
| t0029024 | 22 | 8 AGAAGCTGGGTTGAGAGGGCGT        | miRNA | miR-320d    |
| t0028508 | 23 | 8 AGAAGCTGGGTTGAGAGGGCGTA       | miRNA | miR-320d    |
| t0028470 | 23 | 8 AAAAGCTGGGTTGAGAAGGCGAA       | miRNA | miR-320a    |
| t0028350 | 23 | 8 AAGAGCTGGGTTGAGAGGGCGAT       | miRNA | miR-320a    |
| t0028356 | 24 | 8 AATCTGAGAAGGCGCACAAAGGTTA     | miRNA | miR-3200-5p |
| t0028474 | 23 | 8 CACCTTGCCTACTCAGGTCTGA        | miRNA | miR-3200-3p |
| t0028399 | 18 | 8 TCAGTCGGATGTTTACAG            | miRNA | miR-30e*    |
| t0028484 | 26 | 8 TGTA AACATCCTACACTCTCAAAAAA   | miRNA | miR-30c     |
| t0028514 | 23 | 8 TGTA AACATCCTACACTCAGCTA      | miRNA | miR-30b     |
| t0028637 | 19 | 8 GCGGGTCGGGGGGCGGGG            | miRNA | miR-2981    |
| t0028738 | 18 | 8 CGCGGGTCGGGGGGCGGG            | miRNA | miR-2981    |
| t0028774 | 22 | 8 TTCAAGAAATTCAGGATAGGTT        | miRNA | miR-26b     |

|          |    |                                |       |              |
|----------|----|--------------------------------|-------|--------------|
| t0028826 | 22 | 8 TTCAAGTAATTCAGGATCGGTT       | miRNA | miR-26b      |
| t0028903 | 20 | 8 TCAAGTAATCCAGGATAGGC         | miRNA | miR-26a      |
| t0028980 | 22 | 8 TTCGAGTAATCCAGGATAGGCT       | miRNA | miR-26a      |
| t0028585 | 21 | 8 AATTGCACTTGTCTCGGTCTG        | miRNA | miR-25       |
| t0028742 | 22 | 8 CATTGCACTTGA CTCTCGGTCTGA    | miRNA | miR-25       |
| t0028442 | 27 | 8 CATTGCACTTGTCTCGGTCTGAAAGTAG | miRNA | miR-25       |
| t0028785 | 23 | 8 TGGCTCAGTTCAGCAGGCACAGT      | miRNA | miR-24       |
| t0028664 | 19 | 8 TCACATTGCCAGGGATTTT          | miRNA | miR-23a      |
| t0028381 | 20 | 8 AAGCTTCCAGTTGAAGAACT         | miRNA | miR-22-3p    |
| t0028650 | 19 | 8 AGAGTTGAGTCTGGACGTC          | miRNA | miR-219-1-3p |
| t0028940 | 24 | 8 AGTGAGATTGTTGCATATTTACTT     | miRNA | miR-2162-5p  |
| t0028964 | 23 | 8 CAACGGCATCCCAAAAAGCAGCTG     | miRNA | miR-191      |
| t0028600 | 22 | 8 CAACGCAATCCCAAAAAGCAGCT      | miRNA | miR-191      |
| t0028822 | 22 | 8 CAACGGAGTCCCAAAAAGCAGCT      | miRNA | miR-191      |
| t0028719 | 22 | 8 CAACGGAACCCCAAAAAGCAGCT      | miRNA | miR-191      |
| t0028914 | 22 | 8 CAACGGAATCCCAAGAAGCAGCT      | miRNA | miR-191      |
| t0028779 | 22 | 8 CAACGGAATCCCAAAAAGTAGCT      | miRNA | miR-191      |
| t0028845 | 22 | 8 CAACGGAATCACAAAAGCAGCT       | miRNA | miR-191      |
| t0028857 | 23 | 8 AACGGAATCCCAAAAAGAAGCTGA     | miRNA | miR-191      |
| t0028595 | 27 | 8 TGGAGAGAAAGGCAGTTCCTGAAAAAA  | miRNA | miR-185      |
| t0028398 | 23 | 8 TGGAGAGAAAGGCAGTTGCTGAA      | miRNA | miR-185      |
| t0028764 | 21 | 8 TGCAGAGAAAGGCAGTTCCTG        | miRNA | miR-185      |
| t0028477 | 19 | 8 GGAGAGAAAGGCAGTTCCT          | miRNA | miR-185      |
| t0028744 | 23 | 8 TGGAGAGAAAGGCAGTACCTGAA      | miRNA | miR-185      |
| t0028326 | 21 | 8 TGGAGAGAAAGGCAGTTCCTC        | miRNA | miR-185      |
| t0028354 | 23 | 8 TGGAGAGAAAGGCAGGTCCTGAT      | miRNA | miR-185      |
| t0028387 | 23 | 8 TGGAGAGAAAGGCCGTTTCCTGAA     | miRNA | miR-185      |
| t0028542 | 20 | 8 TGGAGAGAAAGGCCGTTTCCT        | miRNA | miR-185      |
| t0028555 | 20 | 8 TGGGGAGAAAGGCAGTTCCT         | miRNA | miR-185      |
| t0028597 | 21 | 8 AGACCTACTTATTTACCAACA        | miRNA | miR-1839-3p  |
| t0028722 | 25 | 8 TATGGCACTGGTAGAATTCACTTTT    | miRNA | miR-183      |
| t0028966 | 22 | 8 TGAGGGAGTAGGTTGTATAGTA       | miRNA | miR-1827     |
| t0028325 | 20 | 8 TGAGGGAGTAGATTGTGTAG         | miRNA | miR-1827     |
| t0028472 | 21 | 8 TGAGGGAGTAGATTGTATTGT        | miRNA | miR-1827     |
| t0028582 | 22 | 8 TGAGGGAGTAGATTGTATAGTG       | miRNA | miR-1827     |
| t0028584 | 24 | 8 TAGCAGCACGTA AATATTGGCTCG    | miRNA | miR-16b      |
| t0028593 | 20 | 8 GAAGCGGCGATGGCGGAGCT         | miRNA | miR-1636     |
| t0028682 | 29 | 8 GGGGGCGGGAGCGGTTCGGGCGGCGGC  | miRNA | miR-1607     |
| t0028694 | 26 | 8 GCGGGGAGCGGTTCGGGCGGCGGCGG   | miRNA | miR-1607     |
| t0028726 | 22 | 8 TAGAAGCACGTA AATATTGTCG      | miRNA | miR-16       |
| t0028852 | 22 | 8 TAGAAGAACGTA AATATTGGCG      | miRNA | miR-16       |
| t0028911 | 23 | 8 ATAGAAGCACGTA AATATTGGCG     | miRNA | miR-16       |
| t0028550 | 20 | 8 TAGCAGCACGTGA AATATTGG       | miRNA | miR-16       |
| t0028930 | 20 | 8 TAGCAGCACGAAA AATATTGG       | miRNA | miR-16       |
| t0028435 | 19 | 8 TAGCAGAACGTA AATATTG         | miRNA | miR-16       |
| t0028832 | 25 | 8 CCTGTAGCAGCACGTA AATATTGGC   | miRNA | miR-16       |
| t0028913 | 23 | 8 AGGTAGCAGCACGTA AATATTAA     | miRNA | miR-16       |
| t0029041 | 20 | 8 TAGCAGCACAA CATGGTTTA        | miRNA | miR-15b      |
| t0028948 | 18 | 8 TAGAAGCACATCATGGTT           | miRNA | miR-15b      |
| t0028535 | 18 | 8 TAGCAGAACATCATGGTT           | miRNA | miR-15b      |
| t0028760 | 22 | 8 TAGTAGCACATCATGGTTTACA       | miRNA | miR-15b      |
| t0028993 | 19 | 8 TAGCAGCATATCATGTTTT          | miRNA | miR-15b      |
| t0028400 | 20 | 8 TAGCAGGACATCATGGTTTA         | miRNA | miR-15b      |
| t0028430 | 19 | 8 TAGCAGCACACCATGGTTT          | miRNA | miR-15b      |
| t0028538 | 20 | 8 TAGCAGCACATACTGGTTTG         | miRNA | miR-15a      |
| t0028754 | 22 | 8 TAGCAGCACATAATGGGTTGTG       | miRNA | miR-15a      |
| t0028772 | 23 | 8 TGAGA ACTGAATTCTATAGGCTG     | miRNA | miR-146b     |
| t0028786 | 24 | 8 GGATATCATCATATACTGTAAGAA     | miRNA | miR-144*     |



|          |    |                                |       |           |
|----------|----|--------------------------------|-------|-----------|
| t0028894 | 23 | 8 AAGTGGATATCATCATATACTGT      | miRNA | miR-144*  |
| t0028897 | 21 | 8 ATACAGTATAGATGATGTA          | miRNA | miR-144   |
| t0028324 | 18 | 8 TACAGTATGGATGATGTA           | miRNA | miR-144   |
| t0028419 | 21 | 8 CCCATAAAGGAGAAAGCACTA        | miRNA | miR-142   |
| t0028612 | 23 | 8 CCCATAAAGTAGAAAGCACTATT      | miRNA | miR-142   |
| t0028752 | 20 | 8 CCCAAAAGTAGAAAGCACTA         | miRNA | miR-142   |
| t0028843 | 23 | 8 TACCACAGGGTAGAACCACGGAC      | miRNA | miR-140   |
| t0028893 | 24 | 8 TACCCAGGGTAGAACCACGGACA      | miRNA | miR-140   |
| t0028978 | 22 | 8 TACCACAGGTTAGAACCACGGGA      | miRNA | miR-140   |
| t0028541 | 22 | 8 ACCACAGGGTAGAACCATGGAT       | miRNA | miR-140   |
| t0028626 | 23 | 8 TTCCACAGGGTAGAACCACGGAT      | miRNA | miR-140   |
| t0028629 | 22 | 8 TACCACAGGGTAGAACTCCGGA       | miRNA | miR-140   |
| t0028681 | 22 | 8 ATCACAGGGTAGAACCACGGAC       | miRNA | miR-140   |
| t0028739 | 22 | 8 ACCACAGAGTAGAACCACGGAC       | miRNA | miR-140   |
| t0028677 | 22 | 8 ACCACAGGGGAGAACCACGGAG       | miRNA | miR-140   |
| t0028687 | 22 | 8 ACCACAGGGTGGAACCACGGAA       | miRNA | miR-140   |
| t0028401 | 22 | 8 ACCACAGGGAAGAACCACGGAG       | miRNA | miR-140   |
| t0028522 | 23 | 8 TACCACACGGTAGAACCACGGAC      | miRNA | miR-140   |
| t0028850 | 23 | 8 TACCACAGGGCAGAACCACGGAT      | miRNA | miR-140   |
| t0028334 | 23 | 8 ACCACAGGGTGGAACCACGGACA      | miRNA | miR-140   |
| t0028378 | 20 | 8 CACAGGGTAGAACCACGGAC         | miRNA | miR-140   |
| t0028390 | 21 | 8 ACCACAGGGTAGAACCACGAA        | miRNA | miR-140   |
| t0028391 | 23 | 8 TACCACAGGGTAGAACAAGGAA       | miRNA | miR-140   |
| t0028393 | 21 | 8 ACCACAGGGTAGAAGCACGGA        | miRNA | miR-140   |
| t0028439 | 24 | 8 TAGCACAGGGTAGAACCACGGACA     | miRNA | miR-140   |
| t0028449 | 23 | 8 TACCACAGGGTAGCACCACGGAC      | miRNA | miR-140   |
| t0028524 | 22 | 8 TACCAGAGGGTAGAACCACGGGA      | miRNA | miR-140   |
| t0028529 | 22 | 8 ACCACAGGGTAGCACCACGGAC       | miRNA | miR-140   |
| t0028552 | 22 | 8 ACCACAGGGTAGAACCACGGGT       | miRNA | miR-140   |
| t0028606 | 24 | 8 TACCACAGGGTAGAACCACGGCAA     | miRNA | miR-140   |
| t0028607 | 23 | 8 TACCACAGGGTAGAACCACGGTC      | miRNA | miR-140   |
| t0028634 | 24 | 8 TATCACAGGGTAGAACCACGGACA     | miRNA | miR-140   |
| t0028665 | 23 | 8 ACCACAGGGCAGAACCACGGACA      | miRNA | miR-140   |
| t0028679 | 23 | 8 GTGGGGGAGAGGCTGTTTTTTTT      | miRNA | miR-1275  |
| t0028691 | 21 | 8 TAAAGGGCTGACAGTGCAGAT        | miRNA | miR-106b  |
| t0028702 | 23 | 8 ACCAGCATTGTACAGGGCTATGA      | miRNA | miR-103a  |
| t0028711 | 23 | 8 AGCAGCAATGTACAGGGCTATGA      | miRNA | miR-103a  |
| t0028725 | 20 | 8 AGCAGCATCGTACAGGGCTA         | miRNA | miR-103a  |
| t0028731 | 21 | 8 GTACAGCACTGTGATAACTGA        | miRNA | miR-101   |
| t0028765 | 22 | 8 GTACAGTACTGTGGTAACTGAA       | miRNA | miR-101   |
| t0028787 | 22 | 8 GTGCAGTACTGTGATAACTGAA       | miRNA | miR-101   |
| t0028792 | 21 | 8 GTACAGAACTGTGATAACTGA        | miRNA | miR-101   |
| t0028865 | 21 | 8 GTATAGTACTGTGATAACTGA        | miRNA | miR-101   |
| t0028890 | 20 | 8 TACAGAACTGTGATAACTGA         | miRNA | miR-101   |
| t0028945 | 22 | 8 GTACAGTACTGCGATAACTGAA       | miRNA | miR-101   |
| t0028959 | 22 | 8 GTACAGTACTGTGATAGCTGAA       | miRNA | miR-101   |
| t0028318 | 22 | 8 GTACAGTACTGTGCTAACTGAA       | miRNA | miR-101   |
| t0028708 | 22 | 8 GTACGGTACTGTGATAACTGAA       | miRNA | miR-101   |
| t0028316 | 19 | 8 GAGGTAGTAGTTTGTGCTG          | miRNA | let-7i    |
| t0028769 | 22 | 8 TGAGGTAGTAGTCTGTGCTGTT       | miRNA | let-7i    |
| t0028793 | 21 | 8 GAGGTAGTAGTTTGTGCTGTT        | miRNA | let-7i    |
| t0028319 | 23 | 8 TGAGGGAGTAGTTTGTACAGTTA      | miRNA | let-7g    |
| t0028348 | 21 | 8 TGAGATAGTAGTTTGTACAGT        | miRNA | let-7g    |
| t0028379 | 21 | 8 TGAGGTAGTAGTTTGTACAGC        | miRNA | let-7g    |
| t0028389 | 21 | 8 TGAGGTAGTAGTTTGTACGGT        | miRNA | let-7g    |
| t0028429 | 20 | 8 TGAGGTAGTAGATTATATTT         | miRNA | let-7f-5p |
| t0028496 | 24 | 8 TGAGGTAGTAGATTGTATATGTTT     | miRNA | let-7f-5p |
| t0028558 | 28 | 8 TGAGGTAGTAGATTGTATAGTTCCGAAG | miRNA | let-7f    |

|          |    |                                   |       |             |
|----------|----|-----------------------------------|-------|-------------|
| t0028659 | 21 | 8 TGAGGTAGTAGATATTATAGT           | miRNA | let-7f      |
| t0028967 | 22 | 8 AGGTAGTAGATTGTATAGTTGT          | miRNA | let-7f      |
| t0029009 | 23 | 8 TGAGGCAGTAGATTGTATAGTTT         | miRNA | let-7f      |
| t0028846 | 22 | 8 GGTAGTAGATTGTATAGTTTGA          | miRNA | let-7f      |
| t0028869 | 22 | 8 TGAGGTAGTAGTTTGTGTAGTT          | miRNA | let-7f      |
| t0029022 | 23 | 8 TGAGGTAGTAGATTGTACAGTTA         | miRNA | let-7f      |
| t0028566 | 23 | 8 TGAGGTAGTAGATTGTATAGGTA         | miRNA | let-7f      |
| t0028799 | 19 | 8 TGAGCTAGTAGATTGTATA             | miRNA | let-7f      |
| t0028817 | 23 | 8 TGAGGTAGTAGATTATATAGTTG         | miRNA | let-7f      |
| t0029015 | 23 | 8 TGGGGTAGTAGATTGTATAGTTA         | miRNA | let-7f      |
| t0028583 | 25 | 8 TGAGGTAGTAGATTGTATAGTTGAA       | miRNA | let-7f      |
| t0028590 | 21 | 8 AGAGGTAGAAGGTTGCATAGT           | miRNA | let-7d      |
| t0028364 | 22 | 8 AGAGGTAGTAGGTTGCTTAGTT          | miRNA | let-7d      |
| t0028375 | 20 | 8 AGAGGTAGTAGGTTGCATCG            | miRNA | let-7d      |
| t0028436 | 21 | 8 AGAGGTAGTAGGTTGCATAGG           | miRNA | let-7d      |
| t0028438 | 21 | 8 AGAGGTAGCAGGTTGCATAGT           | miRNA | let-7d      |
| t0028511 | 21 | 8 AGAGGTAGGAGGTTGCATAGT           | miRNA | let-7d      |
| t0028512 | 22 | 8 AGAGCTAGTAGGTTGCATAGTT          | miRNA | let-7d      |
| t0028559 | 25 | 8 TGAGGTAGTAGGGTGTATGGTTATC       | miRNA | let-7c      |
| t0028567 | 23 | 8 TGAGGTAGCAGGTTGTGTGGTTA         | miRNA | let-7b      |
| t0028649 | 20 | 8 TGCGGTAGTAGGTTGTGTGG            | miRNA | let-7b      |
| t0028854 | 20 | 8 TGAGGTAGTAGGTTGGGTGG            | miRNA | let-7b      |
| t0028963 | 22 | 8 GAGGTAGTAGGTTGTGTGGTTT          | miRNA | let-7b      |
| t0029040 | 19 | 8 TGAGGTAGTAGGTTGTGGG             | miRNA | let-7b      |
| t0028560 | 19 | 8 TGGGGTAGTAGGTTGTGTG             | miRNA | let-7b      |
| t0028570 | 19 | 8 TGAGGTAGTGGGTTGTATA             | miRNA | let-7       |
| t0028578 | 19 | 8 TGAGGAAGTAGGTTGTATA             | miRNA | let-7       |
| t0028690 | 21 | 8 TGACGTAGTAGGTTGTATAGT           | miRNA | let-7       |
| t0028750 | 20 | 8 TGAGATAGTAGGTTGTATAG            | miRNA | let-7       |
| t0028768 | 19 | 7 AGGTGGAAGGTTGTAGGCA             | miRNA | miR-965-5p  |
| t0028848 | 22 | 7 CAAAGTGCTGTTCCGGCAGGTA          | miRNA | miR-93      |
| t0028605 | 22 | 7 CAAAGGGCTGTTCCGTGCAGGTA         | miRNA | miR-93      |
| t0028346 | 23 | 7 CAAAGTGCTGTTCCGTGCAGGAAG        | miRNA | miR-93      |
| t0028411 | 21 | 7 GGGACGGGACGCGGTGCAGTA           | miRNA | miR-92b*    |
| t0028505 | 23 | 7 TATTGCACTTGCCCCGGCCTGTA         | miRNA | miR-92a     |
| t0028671 | 21 | 7 TATTGCACTTGTACAGGCCTG           | miRNA | miR-92a     |
| t0028831 | 22 | 7 TATTGCACTTGTCCCGCATGT           | miRNA | miR-92a     |
| t0028875 | 22 | 7 TATTGCACTTGTCCCGACCTGT          | miRNA | miR-92a     |
| t0028462 | 20 | 7 TATTGCACTCGTCCCGGCAG            | miRNA | miR-92      |
| t0028500 | 23 | 7 CCTGGAGGACTGACGTGGAGAAG         | miRNA | miR-739     |
| t0028564 | 21 | 7 GAGGGCGCGCGGGTCGGGGCG           | miRNA | miR-638     |
| t0028701 | 19 | 7 TGTCTTACTCCCTCAGGCA             | miRNA | miR-550a*   |
| t0029637 | 19 | 7 AAAAGCAATCGCGTTTTT              | miRNA | miR-548h    |
| t0029297 | 20 | 7 GCGAGGGTCCCAGGGCGGGG            | miRNA | miR-5126    |
| t0029390 | 21 | 7 CTTGCCATCTGGGCCATCATA           | miRNA | miR-500b    |
| t0029423 | 23 | 7 ACCTGTAAGTACTGAGCTGCCCGAGA      | miRNA | miR-486-5p  |
| t0029384 | 28 | 7 TCCTGTAAGTACTGAGCTGCCCGAGATGGCA | miRNA | miR-486-5p  |
| t0029156 | 20 | 7 TCCTGTAAGTACTGAGCTGCCCGG        | miRNA | miR-486-5p  |
| t0029181 | 22 | 7 TCCTGTAAGTACTGAGCTGCCCGCT       | miRNA | miR-486-5p  |
| t0029365 | 21 | 7 GCCTGTAAGTACTGAGCTGCCCGA        | miRNA | miR-486-5p  |
| t0029809 | 21 | 7 TCCTGTAAGTACTGAGCTGCCCGA        | miRNA | miR-486-5p  |
| t0029315 | 21 | 7 TCCTGTAAGTACTGAGCTGCCCGA        | miRNA | miR-486-5p  |
| t0029479 | 22 | 7 TCCTGTAAGTACTGAGCTGCCCGAG       | miRNA | miR-486-5p  |
| t0029067 | 22 | 7 TCCTGTAAGTACTGAGCTGCCCGAG       | miRNA | miR-486-5p  |
| t0029229 | 26 | 7 TCCTGTAAGTACTGAGCTGCCCGACGGCT   | miRNA | miR-486-5p  |
| t0029347 | 23 | 7 TCCTGTAAGTACTGAGCTGCCCGAGA      | miRNA | miR-486-5p  |
| t0029716 | 20 | 7 TCCTGTAAGTACTGAGCTGCCCGG        | miRNA | miR-486-5p  |
| t0029081 | 23 | 7 CGTAGAGCAGGGAGCAGGAAGCT         | miRNA | miR-4732-5p |

|          |    |                              |       |             |
|----------|----|------------------------------|-------|-------------|
| t0029079 | 20 | 7 GAGAAGGGTCGGGGCGGTTA       | miRNA | miR-4516    |
| t0029098 | 25 | 7 CGGGGGGAGAAGGGTCGGGGCGGCA  | miRNA | miR-4516    |
| t0029353 | 21 | 7 TGAGGGAGTAGGTTGTGGGGT      | miRNA | miR-4510    |
| t0029370 | 21 | 7 TGAGGGAGTAGGTTGTGTGGA      | miRNA | miR-4510    |
| t0029523 | 25 | 7 AAACCGTTACCATTACTGAGTTCGT  | miRNA | miR-451     |
| t0029566 | 24 | 7 AAACCGTTACCATTACTGCGTTTA   | miRNA | miR-451     |
| t0029581 | 25 | 7 AAACCATACCATTACTGAGTTTAG   | miRNA | miR-451     |
| t0029684 | 22 | 7 TCGAATCCGAGTCACGGCACCC     | miRNA | miR-4454    |
| t0029711 | 20 | 7 AGGAGCATTGTACAGGGCTA       | miRNA | miR-4289    |
| t0029732 | 22 | 7 TGAGGGGCAGAGTGCGAGACTT     | miRNA | miR-423-5p  |
| t0029747 | 21 | 7 TGAGGGGAAGAGAGCGAGAAT      | miRNA | miR-423-5p  |
| t0029780 | 20 | 7 TGGCAGAGAGCGAGACTTTT       | miRNA | miR-423-5p  |
| t0029298 | 19 | 7 TGAGGGGCAGAGAGCGGGA        | miRNA | miR-423-5p  |
| t0029493 | 23 | 7 TGAGGGGCAGAGAGGGAGACTTA    | miRNA | miR-423-5p  |
| t0029800 | 19 | 7 TGGGGGGCAGAGAGCGAGA        | miRNA | miR-423-5p  |
| t0029612 | 24 | 7 TGAGGGGCAGAAAGCGAGACTTTT   | miRNA | miR-423-5p  |
| t0029759 | 23 | 7 ACCCGGGGGGCCGGCGGCGGCGG    | miRNA | miR-3885-5p |
| t0029302 | 20 | 7 CGGCGGCGTCGGCGGCGGCGG      | miRNA | miR-3885-5p |
| t0029488 | 22 | 7 CGGCGGCGGCGGGGGTGTGGGG     | miRNA | miR-3885-5p |
| t0029802 | 23 | 7 ACTGGACTTGAGCCAGAAGGCA     | miRNA | miR-378     |
| t0029248 | 23 | 7 ACTGGACTTGAGACAGAAGGCA     | miRNA | miR-378     |
| t0029730 | 25 | 7 CTTATCAGATTGTATTGTAATTATT  | miRNA | miR-374a*   |
| t0029159 | 18 | 7 CGGGGGTGGGGTCGGCGG         | miRNA | miR-3621    |
| t0029255 | 22 | 7 TGAGGATGGATAGCAAGGAAGC     | miRNA | miR-3605-5p |
| t0029268 | 23 | 7 TGAAGACTGAAGTGGAGAAGGGA    | miRNA | miR-3526    |
| t0029362 | 22 | 7 GAAGACTGAAGTGGAGAAGGGG     | miRNA | miR-3526    |
| t0029419 | 25 | 7 TTGAAGACTGAAGTGGAGAAGGGGT  | miRNA | miR-3526    |
| t0029462 | 21 | 7 AAAGCTGGGTTGAGAGGGCGC      | miRNA | miR-320d    |
| t0029767 | 23 | 7 AAAAGCTGGGTTGGGAGGGCGTA    | miRNA | miR-320d    |
| t0029131 | 21 | 7 AAAAGCTGGGTTGAGAGGGCC      | miRNA | miR-320d    |
| t0029150 | 22 | 7 AAACGCTGGGTTGAGAGGGCGT     | miRNA | miR-320d    |
| t0029288 | 23 | 7 AAAACCTGGGTTGAGAGGGCGTA    | miRNA | miR-320d    |
| t0029503 | 24 | 7 AAAAGCTGGGTTGAGAGGGCGGGA   | miRNA | miR-320d    |
| t0029757 | 23 | 7 AAAAATGGGTTGAGAGGGCGTT     | miRNA | miR-320d    |
| t0029271 | 23 | 7 AAAAGCTGGGTTGAGAGGGCTTA    | miRNA | miR-320d    |
| t0029392 | 22 | 7 AAAAGCTGGGTTGAGAGGGAAA     | miRNA | miR-320d    |
| t0029115 | 23 | 7 AAAAGCCGGGTTGAGAGGGCGTT    | miRNA | miR-320c    |
| t0029307 | 21 | 7 AAAAGCTGGGTCGAGAGGGCG      | miRNA | miR-320a    |
| t0029463 | 23 | 7 AAAAGCTGGATTGAGAGGGCGAA    | miRNA | miR-320a    |
| t0029549 | 23 | 7 AAAGCTGGGTTGAGAGGGCGATT    | miRNA | miR-320a    |
| t0029265 | 23 | 7 AAGAGCTGGGTTGAGAGGGCGAA    | miRNA | miR-320a    |
| t0029358 | 23 | 7 AAAAGCTGGGTTGAGGGGGCGAT    | miRNA | miR-320a    |
| t0029425 | 23 | 7 AAAAGCTGGGTCGAGAGGGCGAA    | miRNA | miR-320a    |
| t0029429 | 22 | 7 AAAAGCTGGGTTGACAGGGCGA     | miRNA | miR-320a    |
| t0029450 | 25 | 7 AAAAGCTGGGTTGAGAGGGCGAATA  | miRNA | miR-320a    |
| t0029536 | 23 | 7 AATCTGAGAAGGCGCACCAAGGTT   | miRNA | miR-3200-5p |
| t0029658 | 23 | 7 AATCTGAGAAGGCGCACCAAGGAT   | miRNA | miR-3200-5p |
| t0029659 | 23 | 7 AATCTGAGAAGGAGCACCAAGGTT   | miRNA | miR-3200-5p |
| t0029756 | 26 | 7 GGCTGGTCCGAGTGCAGTGGTGTTTA | miRNA | miR-3135b   |
| t0029444 | 24 | 7 TGTAACATCCTCGACTGGAAGCT    | miRNA | miR-30a-5p  |
| t0029182 | 22 | 7 TTCAGTAATCCAGGAAAGGCT      | miRNA | miR-26a     |
| t0029357 | 22 | 7 TTCAGTAATCCAGGATAGGCT      | miRNA | miR-26a     |
| t0029434 | 22 | 7 TTAAAGTAATCCAGGATAGGCT     | miRNA | miR-26a     |
| t0029446 | 22 | 7 TTTAAGTAATCCAGGATAGGCT     | miRNA | miR-26a     |
| t0029517 | 20 | 7 AGGCGGAGACTTGGGCACTT       | miRNA | miR-25*     |
| t0029578 | 22 | 7 CATTGGACTTGTCTCGGTCTGA     | miRNA | miR-25      |
| t0029616 | 21 | 7 CATTACACTTGTCTCGGTCTG      | miRNA | miR-25      |
| t0029804 | 21 | 7 CATTGCACTTGTCCGGTCTG       | miRNA | miR-25      |

|          |    |                               |       |            |
|----------|----|-------------------------------|-------|------------|
| t0029262 | 22 | 7 CATTGCACTTGTCTCGGTCCGA      | miRNA | miR-25     |
| t0029484 | 21 | 7 CATTGCACTCGTCTCGGTCTG       | miRNA | miR-25     |
| t0029640 | 21 | 7 CGTTGCACTTGTCTCGGTCTG       | miRNA | miR-25     |
| t0029555 | 21 | 7 CATTGCACTTGCCTCGGTCTG       | miRNA | miR-25     |
| t0029675 | 22 | 7 CATTGCACTTGTACGGTCTGA       | miRNA | miR-25     |
| t0029148 | 22 | 7 CATAGCACTTGTCTCGGTCTGA      | miRNA | miR-25     |
| t0029316 | 21 | 7 AAGCTGCCAGTTGAAGAAGT        | miRNA | miR-22-3p  |
| t0029412 | 25 | 7 TGG AATGTAAGGAAGTGGGTGGATC  | miRNA | miR-206    |
| t0029742 | 19 | 7 TTCCTATGCATATACTTCT         | miRNA | miR-202-5p |
| t0029695 | 18 | 7 TGAGCTAGATTGTATAGT          | miRNA | miR-1961   |
| t0029143 | 23 | 7 TGACCTATGAATTGACAGCCATT     | miRNA | miR-192    |
| t0029222 | 21 | 7 CTGACCTATGAATTGACCGCA       | miRNA | miR-192    |
| t0029360 | 22 | 7 CAACGAAATCCCAAAAGCAGCT      | miRNA | miR-191    |
| t0029525 | 22 | 7 CAGCGGAATCCCAAAAGCAGCT      | miRNA | miR-191    |
| t0029560 | 22 | 7 CAACGGAATCCCAAAAGCAGCG      | miRNA | miR-191    |
| t0029567 | 22 | 7 AACGGAATCCCAAAAGCAGATG      | miRNA | miR-191    |
| t0029583 | 23 | 7 CAACGGAATCCCAAAAGCGGCTG     | miRNA | miR-191    |
| t0029729 | 21 | 7 CAACGGAATCCCAAAAGAAGC       | miRNA | miR-191    |
| t0029791 | 23 | 7 CAACAGAATCCCAAAAGCAGCTG     | miRNA | miR-191    |
| t0029458 | 22 | 7 CAACGGAATCCCAAAAGCAGCT      | miRNA | miR-191    |
| t0029180 | 23 | 7 TGGAGAGAAAGGCAGTTCAGAA      | miRNA | miR-185    |
| t0029065 | 20 | 7 TGGAGAGAAAGGCCGTTCT         | miRNA | miR-185    |
| t0029676 | 21 | 7 TGGAGAGAAAGGCCGTTCTG        | miRNA | miR-185    |
| t0029361 | 23 | 7 TGAAGAGAAAGGCAGTTCCTGAA     | miRNA | miR-185    |
| t0029706 | 22 | 7 TGGAGAGAAAAGAAAGTTCCTGA     | miRNA | miR-185    |
| t0029114 | 23 | 7 TGGAGAGCAAGGCAGTTCCTGAT     | miRNA | miR-185    |
| t0029250 | 20 | 7 TGGAGTGAAAGGCAGTTCCT        | miRNA | miR-185    |
| t0029264 | 21 | 7 AGGCAGATAGAACAGGTCTTG       | miRNA | miR-1839   |
| t0029295 | 18 | 7 TGAGGGAGTAGATTGTAT          | miRNA | miR-1827   |
| t0029389 | 22 | 7 TGAGGGAGTAGATTGTATATTT      | miRNA | miR-1827   |
| t0029587 | 22 | 7 TGAGGGAGTAGGTTGTATGGTT      | miRNA | miR-1827   |
| t0029655 | 23 | 7 TGAGGGAGTAGGTTGTATAGTTG     | miRNA | miR-1827   |
| t0029796 | 18 | 7 TTTGGCAATGGTAGAACT          | miRNA | miR-182    |
| t0029352 | 20 | 7 TTTGGCAATGGTAGAATTC         | miRNA | miR-182    |
| t0029396 | 20 | 7 AACATTC AACGCTGTCGGGG       | miRNA | miR-181a   |
| t0029509 | 20 | 7 TCGGGGCGGCGGCGGCGGG         | miRNA | miR-1777a  |
| t0029522 | 21 | 7 AGCAGCACGTAAATATTGGCA       | miRNA | miR-16b    |
| t0029653 | 25 | 7 GCGGGGAGCGGTTCGGGCGGCGGCGG  | miRNA | miR-1607   |
| t0029693 | 27 | 7 GCGGGGAGCGGTTCGGGCGGCGGCGGT | miRNA | miR-1607   |
| t0029818 | 19 | 7 GGGGGCGGGGAGCGGTTCGG        | miRNA | miR-1607   |
| t0029226 | 19 | 7 GCGGGGAGCGGTTCGGGCG         | miRNA | miR-1607   |
| t0029212 | 21 | 7 TAGCAGCACGTAAATATTGAC       | miRNA | miR-16     |
| t0029393 | 20 | 7 TAGCAGCACGTCAATATTGG        | miRNA | miR-16     |
| t0029542 | 20 | 7 TAGGAGCACGTAAATATTGG        | miRNA | miR-16     |
| t0029682 | 20 | 7 TAGCACCACGTAAATATTGG        | miRNA | miR-16     |
| t0029601 | 24 | 7 TAGCAGCACGTAAATATTGGAGAA    | miRNA | miR-16     |
| t0029677 | 20 | 7 TAGCAGCACGTAAATATTTTC       | miRNA | miR-16     |
| t0029092 | 20 | 7 TAGCAGCCGTAATATTGG          | miRNA | miR-16     |
| t0029697 | 23 | 7 TAGCAGAACGTAAATATTGGCGA     | miRNA | miR-16     |
| t0029698 | 19 | 7 TAACAGCACATCATGGTTT         | miRNA | miR-15b    |
| t0029310 | 22 | 7 TAGCAGCACATCACGGTTTACA      | miRNA | miR-15b    |
| t0029322 | 18 | 7 TAGCAGCAAATCATGGTT          | miRNA | miR-15b    |
| t0029600 | 19 | 7 TAGCAACACATCATGGTTT         | miRNA | miR-15b    |
| t0029753 | 22 | 7 TAGCAGGACATCATGGTTTACA      | miRNA | miR-15b    |
| t0029178 | 22 | 7 TAGCAGCACATCATGATTTACA      | miRNA | miR-15b    |
| t0029417 | 19 | 7 TAGCAGCACATCATGGTCT         | miRNA | miR-15b    |
| t0029445 | 22 | 7 TAGCACCACATCATGGTTTACA      | miRNA | miR-15b    |
| t0029532 | 21 | 7 TAGCAGCACATAGTGGTTTGT       | miRNA | miR-15a    |

|          |    |                              |       |           |
|----------|----|------------------------------|-------|-----------|
| t0029544 | 20 | 7 TAGCAGCAAATAATGGTTTG       | miRNA | miR-15a   |
| t0029690 | 21 | 7 TAGCAGCACATAATGGTCTGT      | miRNA | miR-15a   |
| t0029795 | 21 | 7 TAGCAGCAAATAATGGTTTGT      | miRNA | miR-15a   |
| t0029823 | 22 | 7 TAGCAGCACATAATGGTTTGCG     | miRNA | miR-15a   |
| t0029069 | 21 | 7 TAGCAGCACCTAATGGTTTGT      | miRNA | miR-15a   |
| t0029072 | 21 | 7 TAGCAGCACATAATGGCTTGT      | miRNA | miR-15a   |
| t0029203 | 20 | 7 TAGCAGCACATAAAGGTTTG       | miRNA | miR-15a   |
| t0029284 | 20 | 7 TAGCAGAACATAATGGTTTA       | miRNA | miR-15a   |
| t0029332 | 21 | 7 TAGCAGTACATAATGGTTTGT      | miRNA | miR-15a   |
| t0029480 | 21 | 7 TAACAGCACATAATGGTTTGT      | miRNA | miR-15a   |
| t0029541 | 26 | 7 TCTCCCAACCCTTGTACCAGTGAATC | miRNA | miR-150   |
| t0029758 | 23 | 7 GGATATCATCATATACTGTAAGG    | miRNA | miR-144*  |
| t0029059 | 21 | 7 TACAGTATAGATGATGTACAT      | miRNA | miR-144   |
| t0029141 | 20 | 7 CCCATAAAGTAGAAAGCAAT       | miRNA | miR-142   |
| t0029247 | 23 | 7 TACCACAGGGTGAACCACGGAT     | miRNA | miR-140   |
| t0029375 | 23 | 7 ACCATAGGGTAGAACCACGGACG    | miRNA | miR-140   |
| t0029395 | 23 | 7 TACCACAGGGTAGAACCACAGAT    | miRNA | miR-140   |
| t0029569 | 23 | 7 TACCACAGGGTAGAACCACTGAC    | miRNA | miR-140   |
| t0029630 | 24 | 7 TGCCACAGGGTAGAACCACGGACA   | miRNA | miR-140   |
| t0029643 | 24 | 7 TACCACAGGGTAGAACAAAGGACA   | miRNA | miR-140   |
| t0029656 | 21 | 7 ACCAGAGGGTAGAACCACGGA      | miRNA | miR-140   |
| t0029740 | 23 | 7 TACCTCAGGGTAGAACCACGGAC    | miRNA | miR-140   |
| t0029807 | 22 | 7 ACCACAAGGTAGAACCACGGAC     | miRNA | miR-140   |
| t0029327 | 24 | 7 TACCACAGGGTAGAACCAGGGACA   | miRNA | miR-140   |
| t0029300 | 22 | 7 ACCAAAGGGTAGAACCACGGAA     | miRNA | miR-140   |
| t0029570 | 23 | 7 TACGACAGGGTAGAACCACGGAC    | miRNA | miR-140   |
| t0029651 | 22 | 7 TACCACAGGGTAGAAACAAGGA     | miRNA | miR-140   |
| t0029048 | 23 | 7 TACCACAGGGTAGAACCCCGGCA    | miRNA | miR-140   |
| t0029062 | 22 | 7 ACCACAGGGTGAACCACGGAT      | miRNA | miR-140   |
| t0029075 | 24 | 7 TACCACAGGGTAGAACCCCGGCCA   | miRNA | miR-140   |
| t0029107 | 23 | 7 TACCACAGGGTAGAGCCACGGAA    | miRNA | miR-140   |
| t0029168 | 22 | 7 AACACAGGGTAGAACCACGGAC     | miRNA | miR-140   |
| t0029188 | 22 | 7 ACCACAGGGTAGAACCACAGAA     | miRNA | miR-140   |
| t0029201 | 21 | 7 ACCACAGGGTAGAACCACGCA      | miRNA | miR-140   |
| t0029225 | 22 | 7 ACCACAGGATAGAACCACGGAC     | miRNA | miR-140   |
| t0029336 | 22 | 7 ACCACAGGGTAGAACCACGGAC     | miRNA | miR-140   |
| t0029341 | 22 | 7 ACCGCAGGGTAGAACCACGGAA     | miRNA | miR-140   |
| t0029342 | 24 | 7 TCCCACAGGGTAGAACCACGGACA   | miRNA | miR-140   |
| t0029349 | 23 | 7 ACCACAGGGTAGAACCACGGCAA    | miRNA | miR-140   |
| t0029372 | 22 | 7 GCCACAGGGTAGAACCACGGAT     | miRNA | miR-140   |
| t0029415 | 23 | 7 TACCACAGGGTAGAACCGCGGAT    | miRNA | miR-140   |
| t0029440 | 19 | 7 CAGTGCAATGTAAAAGGC         | miRNA | miR-130a  |
| t0029494 | 19 | 7 TACGTAGATATATATGTAT        | miRNA | miR-1277  |
| t0029497 | 22 | 7 CGGATGAGCAAAGAAAGGGGTT     | miRNA | miR-1255b |
| t0029514 | 22 | 7 AGAAGCATTGTACAGGGCTATA     | miRNA | miR-107   |
| t0029568 | 20 | 7 CCGCACTGTGGGTATTTGCT       | miRNA | miR-106b* |
| t0029577 | 20 | 7 TAAAGGGCTGACAGTGCAGA       | miRNA | miR-106b  |
| t0029586 | 20 | 7 TAAAGTGTGACAGTGAAGA        | miRNA | miR-106b  |
| t0029632 | 20 | 7 TAAAGTGTGACAGAGCAGA        | miRNA | miR-106b  |
| t0029661 | 23 | 7 AGCAGCATTGTACTGGGCTATGA    | miRNA | miR-103a  |
| t0029670 | 21 | 7 AGCAGGATTGTACAGGGCTAT      | miRNA | miR-103a  |
| t0029731 | 21 | 7 AGCACCATTGTACAGGGCTAT      | miRNA | miR-103a  |
| t0029739 | 22 | 7 AGCAGCATTGTACAGGGCTAGG     | miRNA | miR-103a  |
| t0029805 | 23 | 7 CGCAGCATTGTACAGGGCTATGA    | miRNA | miR-103a  |
| t0029195 | 20 | 7 AGCAGGATTGTACAGGGCTA       | miRNA | miR-103a  |
| t0029381 | 23 | 7 AGAAGCATTGTACAGGGCTATGT    | miRNA | miR-103a  |
| t0029101 | 20 | 7 CACAGTACTGTGATAACTGA       | miRNA | miR-101c  |
| t0029565 | 20 | 7 TACAGTACTATGATAACTGA       | miRNA | miR-101b  |

|          |    |                                |       |           |
|----------|----|--------------------------------|-------|-----------|
| t0029692 | 22 | 7 GTACAGTACTGTGATACCTGAA       | miRNA | miR-101   |
| t0029089 | 21 | 7 TACAGTACTGTGTTAACTGAA        | miRNA | miR-101   |
| t0029371 | 22 | 7 TACAGTACTGTGATAAATGAAG       | miRNA | miR-101   |
| t0029551 | 21 | 7 TACAGTACTGTGCTAACTGAA        | miRNA | miR-101   |
| t0029317 | 21 | 7 TACAGTACTGTGATAACTTAA        | miRNA | miR-101   |
| t0029326 | 21 | 7 TACAATACTGTGATAACTGAA        | miRNA | miR-101   |
| t0029387 | 21 | 7 GTACAGTACTGGGATAACTGA        | miRNA | miR-101   |
| t0029482 | 20 | 7 TACGGTACTGTGATAACTGA         | miRNA | miR-101   |
| t0029527 | 22 | 7 GTACAGTACTGAGATAACTGAA       | miRNA | miR-101   |
| t0029792 | 21 | 7 TACAGTACTTTGATAACTGAA        | miRNA | miR-101   |
| t0029803 | 19 | 7 TGAGGTAGTAGATTGAATA          | miRNA | let-7k    |
| t0029368 | 22 | 7 AGAGGTAGTAGTTTGTGCTGTT       | miRNA | let-7i    |
| t0029518 | 22 | 7 TGAGGTAGTAATTTGTGCTGTT       | miRNA | let-7i    |
| t0029074 | 27 | 7 TGAGGTAGTAGTTTGTGCTGTTCCGGCA | miRNA | let-7i    |
| t0029220 | 22 | 7 TGAGGTAGTAGTTTGTGCTGTT       | miRNA | let-7i    |
| t0029228 | 21 | 7 TGAGGAAGTAGTTTGTGCTGT        | miRNA | let-7i    |
| t0029239 | 22 | 7 TGAGGTAGTAGTTTGTGCTGTT       | miRNA | let-7i    |
| t0029293 | 21 | 7 TGAGGTAGTGGTTTGTGCTGT        | miRNA | let-7i    |
| t0029402 | 21 | 7 TGAGGTAGTAGTTTGTGCTGT        | miRNA | let-7i    |
| t0029545 | 21 | 7 TGCGGTAGTAGTTTGTACAGT        | miRNA | let-7g    |
| t0029627 | 21 | 7 TGAGGTAGGAGTTTGTACAGT        | miRNA | let-7g    |
| t0029654 | 21 | 7 TGAGGTAGTAGTTTATACAGT        | miRNA | let-7g    |
| t0029734 | 20 | 7 TGAGGGAGTAGTTTGTACAG         | miRNA | let-7g    |
| t0029146 | 21 | 7 TGAGGTAGTAGTTTGTCCAGT        | miRNA | let-7g    |
| t0029090 | 22 | 7 TGAGGTAGTAGTTTGTACAATT       | miRNA | let-7g    |
| t0029193 | 22 | 7 TGAGGTAGTAGATTGTATTCTT       | miRNA | let-7f-5p |
| t0029253 | 22 | 7 TGAGGTAGTGGATTGTATAGGT       | miRNA | let-7f-5p |
| t0029436 | 21 | 7 TGAGGTAGTAGATTGTAGTTA        | miRNA | let-7f-5p |
| t0029703 | 22 | 7 TGAGGTAGTAGATTGTACAGTA       | miRNA | let-7f    |
| t0029722 | 23 | 7 TGAGGTAGCAGATTGTATAGTTT      | miRNA | let-7f    |
| t0029723 | 25 | 7 TGAGGTAGTAGATTGTATAGTAAAA    | miRNA | let-7f    |
| t0029778 | 23 | 7 TGAGGTAGTAGCTTGTATAGTTA      | miRNA | let-7f    |
| t0029348 | 25 | 7 TGAGGTAGTATATTGTATAGTTATC    | miRNA | let-7f    |
| t0029376 | 23 | 7 TGAGGTAGTAGATTGTATATTTT      | miRNA | let-7f    |
| t0029408 | 19 | 7 TGAGATAGTAGATTGTATA          | miRNA | let-7f    |
| t0029474 | 23 | 7 TGAGGTAGTAGACTGTATAGTTT      | miRNA | let-7f    |
| t0029546 | 23 | 7 TGAGGTAGTAGCTTGTATAGTTG      | miRNA | let-7f    |
| t0029552 | 23 | 7 TGAGGTAGTAGATTGTATAGTCA      | miRNA | let-7f    |
| t0029060 | 19 | 7 TAAGGTAGTAGATTGTATA          | miRNA | let-7f    |
| t0029122 | 22 | 7 CGAGGTAGTAGATTGTATAGTA       | miRNA | let-7f    |
| t0029460 | 23 | 7 TGAGGTAGAAGATTGTATAGTTG      | miRNA | let-7f    |
| t0029103 | 23 | 7 TGAGGTAGTAGATTATATAGTTA      | miRNA | let-7f    |
| t0029117 | 20 | 7 TGAGGTAGTAGATAGTATAG         | miRNA | let-7f    |
| t0029124 | 24 | 7 CTGAGGTAGTAGATTGTATAGTTA     | miRNA | let-7f    |
| t0029206 | 20 | 7 TGAGGTAGTAGATATTATAG         | miRNA | let-7f    |
| t0029299 | 23 | 7 TGAGGTAGTAGATTGTATGGTTA      | miRNA | let-7f    |
| t0029319 | 23 | 7 TGAGGTAGTAGATTGTATGGTTG      | miRNA | let-7f    |
| t0029320 | 20 | 7 AGCGGTAGTAGGTTGCATAG         | miRNA | let-7d    |
| t0029339 | 19 | 7 AGAGGGAGTAGGTTGCATA          | miRNA | let-7d    |
| t0029374 | 20 | 7 AGAGGTAGTAGGTTGCACAG         | miRNA | let-7d    |
| t0029379 | 22 | 7 AGAGGTAGTAGGTTGCATAGTG       | miRNA | let-7d    |
| t0029399 | 20 | 7 AGAGGTAGTAGGATGCATAG         | miRNA | let-7d    |
| t0029426 | 21 | 7 AGAGGTAGTAGTTTGCATAGT        | miRNA | let-7d    |
| t0029465 | 21 | 7 AGGGGTAGTAGGTTGCATAGT        | miRNA | let-7d    |
| t0029499 | 20 | 7 GGAGGTAGTAGGTTGCATAG         | miRNA | let-7d    |
| t0029622 | 22 | 7 TGAGGTAGGAGTTGTGTGGTA        | miRNA | let-7b    |
| t0029667 | 22 | 7 TGCGGTAGTAGGTTGTGTGGTA       | miRNA | let-7b    |
| t0029713 | 22 | 7 TGAGGTAGCAGGTTGTGTGGTA       | miRNA | let-7b    |

|          |    |                                 |       |             |
|----------|----|---------------------------------|-------|-------------|
| t0029724 | 23 | 7 TGAGGTAGCAGGTTGTGTGGTTT       | miRNA | let-7b      |
| t0029735 | 23 | 7 TGAGGTAGTAGGTTGTGCGGTTT       | miRNA | let-7b      |
| t0029140 | 22 | 7 TGAGGTAGTAGGTTGCGTGGTA        | miRNA | let-7b      |
| t0029161 | 26 | 7 TGAGGTAGTAGGTTGTATATTTAATC    | miRNA | let-7       |
| t0029190 | 19 | 7 CGAGGTAGTAGGTTGTATA           | miRNA | let-7       |
| t0029230 | 20 | 7 GGAGGTAGTAGGTTGTATAG          | miRNA | let-7       |
| t0029386 | 19 | 7 TGAGGCAGTAGGTTGTATA           | miRNA | let-7       |
| t0029432 | 20 | 7 TGAGGTACTAGGTTGTATAG          | miRNA | let-7       |
| t0029644 | 21 | 6 CAAAGTGCTGTTCGTGCCGGT         | miRNA | miR-93      |
| t0029801 | 23 | 6 TATTGCACTTGTCCCGCCCTTTA       | miRNA | miR-92b     |
| t0029304 | 22 | 6 TGGAGAGAAAGGAAGTTTCTGA        | miRNA | miR-765     |
| t0029331 | 23 | 6 TGCGGGGCTAGGGCTAACAGCAT       | miRNA | miR-744     |
| t0029391 | 22 | 6 GACTATAGAACTTTCCCCCTCA        | miRNA | miR-625*    |
| t0029491 | 21 | 6 TTATGGTTTGCCTGGGGCTGA         | miRNA | miR-584     |
| t0029507 | 19 | 6 TGCAAAAGTGATCGTGTT            | miRNA | miR-548t    |
| t0029705 | 20 | 6 GCGAGGGGCCCCGGGGCGGGG         | miRNA | miR-5126    |
| t0029191 | 24 | 6 TCTGGGCACAGGCGGATGGACCGT      | miRNA | miR-5107    |
| t0029599 | 22 | 6 TCTGGGCACAGGCGGAAGGACA        | miRNA | miR-5107    |
| t0029786 | 22 | 6 TCTGGGCACAGGCGGATGGGCA        | miRNA | miR-5107    |
| t0029810 | 20 | 6 TAATCCTTGCTACCTGGGTG          | miRNA | miR-500a    |
| t0029816 | 22 | 6 TGCTGTACTGAGCTGCCCCGAG        | miRNA | miR-486-5p  |
| t0030066 | 23 | 6 TCCTGTACTGAGCTGCCACGAGT       | miRNA | miR-486-5p  |
| t0030651 | 23 | 6 TCCTGTACTGCGCTGCCCCGAGA       | miRNA | miR-486-5p  |
| t0029831 | 22 | 6 TCTTGTACTGAGCTGCCCCGCG        | miRNA | miR-486-5p  |
| t0030007 | 21 | 6 TCGTGTACTGAGCTGCCCCGA         | miRNA | miR-486-5p  |
| t0030617 | 32 | 6 TCCTGTACTGAGCTGCCCCGAGGTAGAAT | miRNA | miR-486-5p  |
| t0030376 | 23 | 6 TCCTGGACTGAGCTGCCCCGAGA       | miRNA | miR-486-5p  |
| t0030639 | 22 | 6 TCCTGTACAGAGCTGCCCCGAG        | miRNA | miR-486-5p  |
| t0030477 | 23 | 6 TCATGTACTGAGCTGCCCCGAGA       | miRNA | miR-486-5p  |
| t0030029 | 21 | 6 TCCTCTACTGAGCTGCCCCGA         | miRNA | miR-486-5p  |
| t0030225 | 22 | 6 TCCTGTACTGAGCTGCCAGAA         | miRNA | miR-486-5p  |
| t0030609 | 23 | 6 TCCTGTACTGAGCTGCGCCGAGA       | miRNA | miR-486-5p  |
| t0030551 | 23 | 6 ACTGGGAAGAGGAGCTGAGGGAT       | miRNA | miR-4646-5p |
| t0029825 | 23 | 6 TGAGGTAGTAGGGTGTGTGGTAA       | miRNA | miR-4510    |
| t0029838 | 22 | 6 TGAGGGAGTAGGTTGTGTAGTT        | miRNA | miR-4510    |
| t0029990 | 19 | 6 CGTTACCATTACTGAGTTT           | miRNA | miR-451     |
| t0029993 | 22 | 6 ACCGTTACCATTACTGAGTTAA        | miRNA | miR-451     |
| t0030164 | 21 | 6 AAACCTTTAACATTACTGAGT         | miRNA | miR-451     |
| t0030240 | 26 | 6 AAACAGTTACCATTACTGAGTTTAGT    | miRNA | miR-451     |
| t0030289 | 27 | 6 AAATACGTTACCATTACTGAGTTAAAC   | miRNA | miR-451     |
| t0030292 | 20 | 6 TAACCGTTACCATTACTGAG          | miRNA | miR-451     |
| t0030304 | 25 | 6 AAACCGTTACCATTACTGCGTTTAG     | miRNA | miR-451     |
| t0030442 | 23 | 6 AAACCGTTACCTTTACTGAGTTT       | miRNA | miR-451     |
| t0030514 | 20 | 6 AAACCGTTACCATTACTGTT          | miRNA | miR-451     |
| t0030562 | 20 | 6 AAACCGTTACCATTACGGAG          | miRNA | miR-451     |
| t0029906 | 21 | 6 AAACCGTTACCATTTCTGAGT         | miRNA | miR-451     |
| t0030338 | 19 | 6 AAACCGTTACCATTAATGA           | miRNA | miR-451     |
| t0030418 | 24 | 6 AAACCGTTACCATTACTGAGTTA       | miRNA | miR-451     |
| t0029879 | 23 | 6 AAAAGCTGGGCTGAGAGGGCGAT       | miRNA | miR-4429    |
| t0030009 | 23 | 6 AAAAGCTGGGCTGAGAGGGCGTT       | miRNA | miR-4429    |
| t0030056 | 19 | 6 CATCGGGAATGTCGTGTCC           | miRNA | miR-425*    |
| t0030105 | 20 | 6 TGAGGGGCAGAGAGCGAGCC          | miRNA | miR-423-5p  |
| t0030174 | 23 | 6 TGAGGGGCAGAGATCGAGACTTA       | miRNA | miR-423-5p  |
| t0030196 | 23 | 6 TGAGGGTCACAGAGCGAGACTTT       | miRNA | miR-423-5p  |
| t0030341 | 23 | 6 TGAGTGGCAGAGAGCGAGAATTT       | miRNA | miR-423-5p  |
| t0030343 | 21 | 6 TGAGGGGCAGAGAGCGAGATA         | miRNA | miR-423-5p  |
| t0030345 | 24 | 6 TGAGGGGTTGAGAGCGAGACTTTT      | miRNA | miR-423-5p  |
| t0030508 | 23 | 6 TGAGGGGCAGAGAGCAAGACTTA       | miRNA | miR-423-5p  |

|          |    |                                |       |              |
|----------|----|--------------------------------|-------|--------------|
| t0030579 | 24 | 6 TGAGGGGCAGAGAGCGCGACTTTA     | miRNA | miR-423-5p   |
| t0030645 | 19 | 6 TGAGGGGCAGAGGGCGAGA          | miRNA | miR-423-5p   |
| t0030657 | 22 | 6 TCAGGGGCAGAGAGCGAGACTT       | miRNA | miR-423-5p   |
| t0030502 | 19 | 6 TGAGGGGCAGAGAGCGAGC          | miRNA | miR-423-5p   |
| t0030641 | 23 | 6 TGAGGGGCAGAGAGCGAGATTTA      | miRNA | miR-423-5p   |
| t0030117 | 19 | 6 TGAGGGGAAGAGAGCGAGA          | miRNA | miR-423-5p   |
| t0029923 | 24 | 6 TGAGGGGCAGAGCGCGAGACTTTT     | miRNA | miR-423-5p   |
| t0029929 | 23 | 6 TGAGGGGTAGAGAGCGAGACTTA      | miRNA | miR-423-5p   |
| t0029949 | 20 | 6 TGAGGGGAAGAGAGCGAGAC         | miRNA | miR-423-5p   |
| t0030051 | 21 | 6 GGAGGTAGTAGTTTGTACAGT        | miRNA | miR-3962     |
| t0030127 | 26 | 6 GAAACGGACAAGGGGAATCCGACTGT   | miRNA | miR-3896-3p  |
| t0030154 | 22 | 6 GGGGGGCCGGCGGCGGCGGCGA       | miRNA | miR-3885-5p  |
| t0030288 | 20 | 6 TCGGAGGGCGGCGGCGGCGG         | miRNA | miR-3885-5p  |
| t0030314 | 21 | 6 GGGCGGCGGCGGGGGGAGAAG        | miRNA | miR-3885-5p  |
| t0030317 | 18 | 6 GGGGGTGGGGTTCGGCGGG          | miRNA | miR-3621     |
| t0030347 | 24 | 6 TGAAGACTGAAGGGGAGAAGGGTT     | miRNA | miR-3526     |
| t0030476 | 29 | 6 AACTTTGAAGACTGAAGTGGAGAAGGGG | miRNA | miR-3526     |
| t0030479 | 24 | 6 GAAGACTGAAGTGGAGAAGGGGTT     | miRNA | miR-3526     |
| t0030499 | 21 | 6 AACTTTGAAGACTGAAGGGGA        | miRNA | miR-3526     |
| t0030567 | 20 | 6 TGAGTAGTAGGTTGTATAGT         | miRNA | miR-352      |
| t0030632 | 20 | 6 CACACAGAAATCGCACCCCGT        | miRNA | miR-342-3p   |
| t0030660 | 24 | 6 TCTCACACAGAAATCGCACCCGCC     | miRNA | miR-342-3p   |
| t0030266 | 22 | 6 TCTCACACAGAAATCACACCCG       | miRNA | miR-342-3p   |
| t0030137 | 22 | 6 TCTCACACAGAAATCGCACCCAG      | miRNA | miR-342-3p   |
| t0029878 | 23 | 6 AAAAGCTGGGTTGAGGGGGCGTT      | miRNA | miR-320d     |
| t0029916 | 22 | 6 AAGAGCTGGGTTGAGAGGGCGT       | miRNA | miR-320d     |
| t0030297 | 23 | 6 ACAAGCTGGGTTGAGAGGGCGTA      | miRNA | miR-320d     |
| t0030026 | 23 | 6 AAAAGCTGGGTTGAGAGGGGGTA      | miRNA | miR-320d     |
| t0030078 | 22 | 6 AAAAGCTGGGTTGAGAGAGCGT       | miRNA | miR-320d     |
| t0030140 | 24 | 6 AAAAGCTGGGTTGAGAGGGCGCAA     | miRNA | miR-320d     |
| t0030346 | 23 | 6 AAAAGCTGGGTTGACAGGGCGTA      | miRNA | miR-320d     |
| t0030603 | 23 | 6 AAAAGCTGGGTCGAGAGGGCGTA      | miRNA | miR-320d     |
| t0030185 | 23 | 6 AGAAGCTGGGTTGAGAGGGCGTT      | miRNA | miR-320d     |
| t0029996 | 23 | 6 AAAAGCCGGGTTGAGAGGGCGTA      | miRNA | miR-320c     |
| t0030254 | 21 | 6 AAAAGCTGGGTTGGGAGGGCG        | miRNA | miR-320a     |
| t0030331 | 25 | 6 AAAAGCTGGGTTGAGAGGGCGATAG    | miRNA | miR-320a     |
| t0030558 | 23 | 6 AAAAGCTGAGTTGAGAGGGCGAA      | miRNA | miR-320a     |
| t0029836 | 23 | 6 AAAAGCTGGGATGAGAGGGCGAT      | miRNA | miR-320a     |
| t0030123 | 21 | 6 AAAAGCTGGGTTAAGAGGGCG        | miRNA | miR-320a     |
| t0030180 | 23 | 6 AAAAGCTGGGTTAAGAGGGCGAT      | miRNA | miR-320a     |
| t0030214 | 23 | 6 AATCTGAGAAGGCGCACAAAGGGT     | miRNA | miR-3200-5p  |
| t0030306 | 25 | 6 GGCTGGTCCGAGTGCAGTGGTGTTT    | miRNA | miR-3135b    |
| t0030356 | 20 | 6 CGCGGGTCGGGGGGCGGGGC         | miRNA | miR-2981     |
| t0030451 | 22 | 6 CTTCAAGTAATCCAGGATAGGC       | miRNA | miR-26a      |
| t0030522 | 22 | 6 TTCAAGTAATCCAGGGTAGGCT       | miRNA | miR-26a      |
| t0030640 | 22 | 6 CAATGCACTTGTCTCGGTCTGA       | miRNA | miR-25       |
| t0029904 | 22 | 6 GATTGCACTTGTCTCGGTCTGA       | miRNA | miR-25       |
| t0030041 | 21 | 6 CATTGCACTTGTCTCGGTCCG        | miRNA | miR-25       |
| t0030119 | 19 | 6 ATCACATTGCCAGGGATTC          | miRNA | miR-23a      |
| t0030230 | 22 | 6 AAGCTGCCAGTTGAAGAACTTA       | miRNA | miR-22-3p    |
| t0030295 | 21 | 6 GACTGGGGCGGAACATCTGTT        | miRNA | miR-219-2-3p |
| t0030398 | 23 | 6 CAAAGTGCTCATAGTCCGGTAG       | miRNA | miR-20b      |
| t0030494 | 25 | 6 TGGAATGTAAGGAAGTGTGTGAATC    | miRNA | miR-206      |
| t0030521 | 24 | 6 TAAAGTGCTTATAGTGCAGGTAATC    | miRNA | miR-20       |
| t0030089 | 25 | 6 TGGAATCTAAGAAGTATGTATATC     | miRNA | miR-1a       |
| t0030582 | 20 | 6 TGTGCAAATCCATGCAAAAC         | miRNA | miR-19b      |
| t0030097 | 23 | 6 TCCTGCCCTCCTTGCTGTAGTTT      | miRNA | miR-1976     |
| t0030253 | 22 | 6 CTGACCTATGAATTGACCGCCA       | miRNA | miR-192      |



|          |    |                                 |       |           |
|----------|----|---------------------------------|-------|-----------|
| t0029992 | 21 | 6 CTGACCTATGAATTGAAAGCC         | miRNA | miR-192   |
| t0030241 | 23 | 6 CAAAGGAATCCCAAAAAGCAGCTG      | miRNA | miR-191   |
| t0030425 | 23 | 6 CAACGGAACCCCAAAAAGCAGCTG      | miRNA | miR-191   |
| t0030495 | 22 | 6 CAATGGAATCCCAAAAAGCAGCT       | miRNA | miR-191   |
| t0029922 | 22 | 6 CAACGGAATCCCAAAAAGCAGCC       | miRNA | miR-191   |
| t0030409 | 23 | 6 CAACGGGATCCCAAAAAGCAGCTG      | miRNA | miR-191   |
| t0030545 | 27 | 6 CAACGGAATCCCAAAAAGCAGCTGAATC  | miRNA | miR-191   |
| t0030437 | 22 | 6 TGGAGAGAAAGGCAGTTCCTTC        | miRNA | miR-185   |
| t0029887 | 23 | 6 TGGAGAGAAAGCCAGTTCCTGAA       | miRNA | miR-185   |
| t0030524 | 21 | 6 TGGAGAGAAAGTCAGTTCCTG         | miRNA | miR-185   |
| t0029894 | 23 | 6 TGGAGAGAAAGGCAATTCCTGAT       | miRNA | miR-185   |
| t0029978 | 23 | 6 TGGTGAGAAAGGCAGTTCCTGAA       | miRNA | miR-185   |
| t0030377 | 23 | 6 TGGAGAGAATGGCAGTTCCTGAA       | miRNA | miR-185   |
| t0030661 | 23 | 6 TGGAAAGAAAGGCAGTTCCTGAA       | miRNA | miR-185   |
| t0029833 | 22 | 6 TGGAGAGAAAGGAAGTTCCTGC        | miRNA | miR-185   |
| t0029934 | 23 | 6 TGGAGAGAAAGGCAGCTCCTGAT       | miRNA | miR-185   |
| t0029946 | 21 | 6 TGGAGAGAAAGGAAGTACTG          | miRNA | miR-185   |
| t0030125 | 21 | 6 TGGTGAGAAAGGCAGTTCCTG         | miRNA | miR-185   |
| t0030324 | 23 | 6 TGGAGGGAAAGGCAGTTCCTGAG       | miRNA | miR-185   |
| t0030382 | 21 | 6 TGGAGAGAATGGCAGTTCCTG         | miRNA | miR-185   |
| t0029902 | 24 | 6 TGGAGAGAAAGGAAGTTCCTGAAA      | miRNA | miR-185   |
| t0029998 | 21 | 6 TGGAGAGAAAGGCAGTTCAG          | miRNA | miR-185   |
| t0030068 | 22 | 6 AAGGTAGATAGAACAGGTATTG        | miRNA | miR-1839  |
| t0030076 | 21 | 6 TGAGGGAGTAGGTTGTATGGT         | miRNA | miR-1827  |
| t0030175 | 22 | 6 TGAGGGATTAGATTGTATAGTT        | miRNA | miR-1827  |
| t0030191 | 21 | 6 TGAGGGAGTAGATTGAATAGT         | miRNA | miR-1827  |
| t0030283 | 23 | 6 TGAGGGAGTAGGTTGTATAGTTA       | miRNA | miR-1827  |
| t0030350 | 22 | 6 AACATTCATTGCTGTCGGTGGG        | miRNA | miR-181b  |
| t0030464 | 18 | 6 CGGGTCGGGGCGGCGGCG            | miRNA | miR-1777a |
| t0030485 | 28 | 6 TAGCAGCACGTAATATTGGCAGAAAAA   | miRNA | miR-16b   |
| t0030526 | 28 | 6 GGGGCGGGGAGCGGTCGGGCGGCGGCG   | miRNA | miR-1607  |
| t0030535 | 23 | 6 TAGCAGCACGTAATATTAGCGA        | miRNA | miR-16    |
| t0030593 | 23 | 6 TAGCAGCACGTAATATCGGCGT        | miRNA | miR-16    |
| t0030608 | 20 | 6 TAGCAACACGTAATATTGG           | miRNA | miR-16    |
| t0030647 | 23 | 6 TAGCAGCACATAAATATTGGCGA       | miRNA | miR-16    |
| t0030427 | 20 | 6 TGGCAGCACGTAATATTGG           | miRNA | miR-16    |
| t0029912 | 21 | 6 TAGCAGCACGTAATGTTGGC          | miRNA | miR-16    |
| t0029952 | 19 | 6 TAGCAGCACGTAATATAA            | miRNA | miR-16    |
| t0029956 | 23 | 6 TAGCAGCACATAAATATTGGCGT       | miRNA | miR-16    |
| t0030560 | 23 | 6 TAGCCGCACGTAATATTGGCGA        | miRNA | miR-16    |
| t0030038 | 22 | 6 TAGCAGAACGTAATATTGTCG         | miRNA | miR-16    |
| t0029935 | 20 | 6 TAGCAGCTCGTAATATTGG           | miRNA | miR-16    |
| t0029997 | 23 | 6 TAGCGGCACGTAATATTGGCGA        | miRNA | miR-16    |
| t0030540 | 20 | 6 TAGCAGCACGTAATCTTGG           | miRNA | miR-16    |
| t0030016 | 20 | 6 TAGCCGCACGTAATATTGG           | miRNA | miR-16    |
| t0030057 | 18 | 6 CAGCAGCACATCATGGTT            | miRNA | miR-15b   |
| t0030060 | 19 | 6 TAGCAGAACATCATGGTTA           | miRNA | miR-15b   |
| t0030064 | 18 | 6 TAGCAGCACATCATGGTA            | miRNA | miR-15b   |
| t0030103 | 22 | 6 TAGCAGCACATCATGGTCTACA        | miRNA | miR-15b   |
| t0030162 | 22 | 6 GAGCAGCACATCATGGTTTACA        | miRNA | miR-15b   |
| t0030218 | 19 | 6 AAGCAGCACATCATGGTTT           | miRNA | miR-15b   |
| t0030227 | 20 | 6 TAGCAGCACATAATTGTTTG          | miRNA | miR-15a   |
| t0030291 | 20 | 6 AAGCAGCACATAATGGTTTG          | miRNA | miR-15a   |
| t0030333 | 21 | 6 TAGCAGCACATACTGGTTTGT         | miRNA | miR-15a   |
| t0030407 | 21 | 6 TAGCAGCTCATAATGGTTTGT         | miRNA | miR-15a   |
| t0030448 | 30 | 6 AATAGCAGCACATAATGGTTTGAAAAAA/ | miRNA | miR-15a   |
| t0030516 | 21 | 6 AAGCAGCACATAATGGTTTGT         | miRNA | miR-15a   |
| t0030662 | 22 | 6 TAGCAGAACATAATGGTTTGTG        | miRNA | miR-15a   |

|          |    |                                |       |             |
|----------|----|--------------------------------|-------|-------------|
| t0029910 | 18 | 6 CCAACCCTTGTACCAAGT           | miRNA | miR-150     |
| t0029975 | 23 | 6 TGAGAACTGAATCCATAGGCTA       | miRNA | miR-146b-5p |
| t0030092 | 25 | 6 GGATATCATCATATACTGTAAGTTA    | miRNA | miR-144*    |
| t0030093 | 23 | 6 GGATATCATCATATACTGTAATA      | miRNA | miR-144*    |
| t0030205 | 20 | 6 CTACAGTATAGATGATTTAC         | miRNA | miR-144     |
| t0030581 | 20 | 6 TACAGTATAGATGATGTAAT         | miRNA | miR-144     |
| t0030027 | 21 | 6 CCCATAAAGTAGAAAGAACTA        | miRNA | miR-142     |
| t0030192 | 21 | 6 CCCATAAAGAAGAAAGCACTA        | miRNA | miR-142     |
| t0030231 | 19 | 6 CCCATAAAGTAGAAAGCAT          | miRNA | miR-142     |
| t0030252 | 23 | 6 TACCACAGGGTATAACCACGGAC      | miRNA | miR-140     |
| t0030391 | 32 | 6 TACCACAGGGTAGAACCACGGATGTGGG | miRNA | miR-140     |
| t0030486 | 23 | 6 TACCTCAGGGTAGAACCACGGAA      | miRNA | miR-140     |
| t0030566 | 23 | 6 GACCACAGGGTAGAACCACGGAC      | miRNA | miR-140     |
| t0029884 | 22 | 6 ACCACAGGGTAGAACCACGGGA       | miRNA | miR-140     |
| t0030618 | 23 | 6 TACCACAGGGTAGAACCAGGGAC      | miRNA | miR-140     |
| t0030272 | 22 | 6 ACCGCAGGGTAGAACCACGGAT       | miRNA | miR-140     |
| t0030611 | 23 | 6 ACCACAGGGTAGAACCACACACT      | miRNA | miR-140     |
| t0030050 | 22 | 6 ACCACAGGGCAGAACCACGGAT       | miRNA | miR-140     |
| t0030378 | 20 | 6 CCACAGGGGAGAACCACGGA         | miRNA | miR-140     |
| t0029893 | 22 | 6 TCCACAGGGTAGAACCACGGA        | miRNA | miR-140     |
| t0029930 | 24 | 6 GACCACAGGGTAGAACCACGGACA     | miRNA | miR-140     |
| t0030367 | 23 | 6 TACCACAGGGTAGAACCACGAAA      | miRNA | miR-140     |
| t0029837 | 24 | 6 TACCACAGGGTAGAACCACAGACG     | miRNA | miR-140     |
| t0029840 | 23 | 6 TACTACAGGGTAGAACCACGGAT      | miRNA | miR-140     |
| t0029846 | 24 | 6 TACCACAGGGTAGAACCCCGGATA     | miRNA | miR-140     |
| t0029848 | 22 | 6 ACCACAGGGTAAAACCACGGAC       | miRNA | miR-140     |
| t0029932 | 22 | 6 ACCACAGGGTAGAACCACGAAC       | miRNA | miR-140     |
| t0029948 | 22 | 6 TACCACAGGGTACAACCACGGA       | miRNA | miR-140     |
| t0029981 | 21 | 6 ACCACAGGGTAGAACTACGGC        | miRNA | miR-140     |
| t0030015 | 23 | 6 ACCACAGGGTAGAACCACGGGCA      | miRNA | miR-140     |
| t0030034 | 23 | 6 TATCACAGGGTAGAACCACGGAT      | miRNA | miR-140     |
| t0030079 | 22 | 6 AACACAGGGTAGAACCACGGAA       | miRNA | miR-140     |
| t0030104 | 23 | 6 TACCACAGGGTAGACCCACGGAC      | miRNA | miR-140     |
| t0030124 | 23 | 6 ACAACAGGGTAGAACCACGGACA      | miRNA | miR-140     |
| t0030134 | 23 | 6 TACCACAGGGTAGAACCAAGGAG      | miRNA | miR-140     |
| t0030141 | 23 | 6 ACCACAGGGTAGAACCACAGACA      | miRNA | miR-140     |
| t0030161 | 23 | 6 ACCACAGAGTAGAACCACGGACA      | miRNA | miR-140     |
| t0030187 | 22 | 6 TACCACATGGTAGAACCCCGGA       | miRNA | miR-140     |
| t0030200 | 22 | 6 TACCACAGGGTAGAATCCCGGA       | miRNA | miR-140     |
| t0030209 | 23 | 6 ACCACAGGGTAGAACCCCGGACT      | miRNA | miR-140     |
| t0030212 | 23 | 6 TACCACAGAGTAGAACCACGGAT      | miRNA | miR-140     |
| t0030216 | 23 | 6 TACCACAGGGTAGACCCACGGAA      | miRNA | miR-140     |
| t0030233 | 23 | 6 ACCACAGGGTAGAACAACGGACT      | miRNA | miR-140     |
| t0030238 | 22 | 6 ACCACAGGGTAGAAACACGGAG       | miRNA | miR-140     |
| t0030244 | 23 | 6 TACCGCAGGGTAGAACCACGGAT      | miRNA | miR-140     |
| t0030249 | 22 | 6 ACCACAGGGTAAAACCACGGAA       | miRNA | miR-140     |
| t0030316 | 22 | 6 TACCACAGGGTAGAACCACGGA       | miRNA | miR-140     |
| t0030322 | 22 | 6 GCCACAGGGTAGAACCACGGAC       | miRNA | miR-140     |
| t0030325 | 24 | 6 TACAACAGGGTAGAACCACGGACG     | miRNA | miR-140     |
| t0030334 | 22 | 6 ACCACAGAGTAGAACCACGGAA       | miRNA | miR-140     |
| t0030410 | 20 | 6 ACCACAGGGTAGAACCCCGG         | miRNA | miR-140     |
| t0030414 | 22 | 6 ACCAAAGGGTAGAACCACGGAC       | miRNA | miR-140     |
| t0030432 | 23 | 6 TACGACAGGGTAGAACCACGGAA      | miRNA | miR-140     |
| t0030449 | 22 | 6 CAGTGCAATGTTAAAAGGGAAT       | miRNA | miR-130a    |
| t0030458 | 24 | 6 TGGAGTGTGACAATGGGGTTTATC     | miRNA | miR-122     |
| t0030493 | 22 | 6 AGCAGCATTGTACAGGGATATT       | miRNA | miR-107     |
| t0030500 | 22 | 6 TACCGCACTGTGGGGACTTGCT       | miRNA | miR-106b*   |
| t0030536 | 19 | 6 AAAGTGCTGACAGTGCAGA          | miRNA | miR-106b    |

|          |    |                              |       |           |
|----------|----|------------------------------|-------|-----------|
| t0030541 | 21 | 6 TAAAGTGCTGACAGCGCAGAT      | miRNA | miR-106b  |
| t0030544 | 20 | 6 TAAAGTGCTGACGGTGCAGA       | miRNA | miR-106b  |
| t0030570 | 21 | 6 CAAAGTGCTGACAGTGCAGAT      | miRNA | miR-106b  |
| t0030574 | 22 | 6 AAAAGTGCTTACAGTGCAGGAA     | miRNA | miR-106   |
| t0030577 | 20 | 6 AGCAGCATTGTACAGGGGTA       | miRNA | miR-103a  |
| t0030578 | 22 | 6 AGCAGCATTGTACAGGGGTATG     | miRNA | miR-103a  |
| t0030643 | 26 | 6 AGCAGCATCGTACAGGGCTATGAATC | miRNA | miR-103a  |
| t0030648 | 21 | 6 CAGCAGCATTGTACAGGGCTA      | miRNA | miR-103a  |
| t0030014 | 21 | 6 AGCAGCATTGTACAGGGCCAT      | miRNA | miR-103a  |
| t0030257 | 23 | 6 AGCAGCATTGTACAGGGGTATGA    | miRNA | miR-103a  |
| t0030511 | 20 | 6 AGCAGCATTGTACAGGACTA       | miRNA | miR-103a  |
| t0030417 | 23 | 6 AGCAGGATTGTACAGGGCTATGA    | miRNA | miR-103a  |
| t0030189 | 22 | 6 AGCAGCATTGTACAGGGCCATG     | miRNA | miR-103a  |
| t0030300 | 22 | 6 GAACAGTACTGTGATAACTGAA     | miRNA | miR-101c  |
| t0030340 | 20 | 6 ACAGTACTGTGATAACTGAT       | miRNA | miR-101c  |
| t0030397 | 22 | 6 GTACAGTAATGTGATAACTGAA     | miRNA | miR-101   |
| t0030474 | 22 | 6 GTACAGTACTGTGATAATTGAA     | miRNA | miR-101   |
| t0029921 | 22 | 6 GTACAGTACTGTGATATCTGAA     | miRNA | miR-101   |
| t0030118 | 20 | 6 TACAATACTGTGATAACTGA       | miRNA | miR-101   |
| t0030359 | 21 | 6 GTACAGTAATGTGATAACTGA      | miRNA | miR-101   |
| t0030370 | 21 | 6 TACAGTACTGTGATAGCTGAA      | miRNA | miR-101   |
| t0030389 | 22 | 6 TACAGTACTGTGATAACTGCAG     | miRNA | miR-101   |
| t0030434 | 26 | 6 GTACAGTACTGTGATAACTGAACTGT | miRNA | miR-101   |
| t0030460 | 22 | 6 GTACAGTACTGTGATAACCGAA     | miRNA | miR-101   |
| t0030519 | 24 | 6 TACAGTACTGTGATAACTGAAGAT   | miRNA | miR-101   |
| t0030561 | 20 | 6 TACAGCACTGTGATAACTGA       | miRNA | miR-101   |
| t0030620 | 21 | 6 TAGAGTACTGTGATAACTGAA      | miRNA | miR-101   |
| t0030659 | 23 | 6 TATAGTACTGTGATAACTGAAGA    | miRNA | miR-101   |
| t0029841 | 20 | 6 TACAGTACTGTGATCACTGA       | miRNA | miR-101   |
| t0029849 | 22 | 6 CTACAGTACTGTGATAACTGAA     | miRNA | miR-101   |
| t0029940 | 25 | 6 TGGAATGTAAGAAGTGTGTCCATC   | miRNA | miR-1     |
| t0029943 | 23 | 6 TGAGGTAGTAGATTGAATAGTTG    | miRNA | let-7k    |
| t0029953 | 20 | 6 TGAGGTAGTAGATTGTGCTG       | miRNA | let-7i    |
| t0029964 | 19 | 6 TGAGGCAGTAGTTTGTGCT        | miRNA | let-7i    |
| t0029970 | 21 | 6 TGAGGTAGGAGTTTGTGCTGT      | miRNA | let-7i    |
| t0030044 | 21 | 6 TGAGGCAGTAGTTTGTGCTGT      | miRNA | let-7i    |
| t0030167 | 20 | 6 TGAGGTAGTAGTTTGTGCTG       | miRNA | let-7i    |
| t0030201 | 21 | 6 TGAGGTAGTAGTTTGTAGAGT      | miRNA | let-7g    |
| t0030265 | 21 | 6 TGAGGTAGTAGTTTGTACTGT      | miRNA | let-7g    |
| t0030329 | 21 | 6 TGAGGTAGTAGTTTGTACAGA      | miRNA | let-7g    |
| t0030436 | 22 | 6 TGAGGTAGTAGATTGTATAGCG     | miRNA | let-7f-5p |
| t0030463 | 22 | 6 TGAGGTAGTAGATTGTATTGTC     | miRNA | let-7f-5p |
| t0030478 | 22 | 6 TGAGGTAGTAGTATGTATAGTT     | miRNA | let-7f    |
| t0030045 | 22 | 6 TGAGGTAGTAGATTGGATAGTA     | miRNA | let-7f    |
| t0030564 | 23 | 6 TGAGGAAGTAGATTGTATAGTTT    | miRNA | let-7f    |
| t0029861 | 25 | 6 ATGAGGTAGTAGATTGTATAGTAAA  | miRNA | let-7f    |
| t0030018 | 19 | 6 AGAGGTAGTAGATTGTATA        | miRNA | let-7f    |
| t0030019 | 20 | 6 CTGAGGTAGTAGATTGTATA       | miRNA | let-7f    |
| t0030226 | 23 | 6 TGAGGTAGTAGATTGTATAGCTA    | miRNA | let-7f    |
| t0030280 | 22 | 6 TGAGGTAGTAGACTGTATAGTA     | miRNA | let-7f    |
| t0029888 | 23 | 6 TGAGGTAGTAGATTGTATCGTTA    | miRNA | let-7f    |
| t0030586 | 22 | 6 CGAGGTAGTAGTTTGCATAGTT     | miRNA | let-7d    |
| t0030650 | 22 | 6 AGAGGTAGTTGGTTGCATAGTT     | miRNA | let-7d    |
| t0030023 | 20 | 6 AGAGGTAGTGGTTGCATAG        | miRNA | let-7d    |
| t0030271 | 20 | 6 AGAGGTAGTAGATTGCATAG       | miRNA | let-7d    |
| t0029927 | 22 | 6 AGTGGTAGTAGTTTGCATAGTT     | miRNA | let-7d    |
| t0030194 | 20 | 6 AGAGGTAGTAGTTTGCATAG       | miRNA | let-7d    |
| t0030213 | 21 | 6 GGAGGTAGTAGTTTGCATAGT      | miRNA | let-7d    |

|          |    |                                   |       |            |
|----------|----|-----------------------------------|-------|------------|
| t0030277 | 21 | 6 AGAGGTCGTAGGTTGCATAGT           | miRNA | let-7d     |
| t0030431 | 21 | 6 AGAGGTAGTGGGTTGCATAGT           | miRNA | let-7d     |
| t0030515 | 25 | 6 TGAGGAAGTAGGTTGTATGGTTATC       | miRNA | let-7c     |
| t0030576 | 22 | 6 TGAGGTAGTAGCTTGTATGGTT          | miRNA | let-7c     |
| t0030631 | 19 | 6 TGAGGTAGTAGGGTGTGTG             | miRNA | let-7b     |
| t0030634 | 23 | 6 TGAGGTGGTAGGTTGTGTGGTTT         | miRNA | let-7b     |
| t0029857 | 23 | 6 TGAGGTGGTAGGTTGTGTGGTTA         | miRNA | let-7b     |
| t0029988 | 25 | 6 TGAGGTAGTAGGTTGTGTGGTCAA        | miRNA | let-7b     |
| t0030037 | 24 | 6 TGAGGAAGTAGGTTGTGTGGTTAA        | miRNA | let-7b     |
| t0030135 | 23 | 6 TGAGGCAGTAGGTTGTGTGGTTT         | miRNA | let-7b     |
| t0030170 | 20 | 6 TGAGGTAGAAGTTGTGTGG             | miRNA | let-7b     |
| t0030261 | 22 | 6 TGAGGTAGTAGGATGTGTGGTA          | miRNA | let-7b     |
| t0030362 | 23 | 6 TGAGGTAGTAGGTTGCGTGGTTG         | miRNA | let-7b     |
| t0030380 | 23 | 6 TGAGGTAGTAGGCTGTGTGGTTT         | miRNA | let-7b     |
| t0030393 | 19 | 6 TGAGGTGGTAGGTTGTGTG             | miRNA | let-7b     |
| t0029901 | 23 | 6 TGAGGTAGTAGGATGTGTGGTTA         | miRNA | let-7b     |
| t0029950 | 23 | 6 CGAGGTAGTAGGTTGTGTGGTTA         | miRNA | let-7b     |
| t0029832 | 23 | 6 TGAGGTAGTAGGGTGTGTGGTTT         | miRNA | let-7b     |
| t0029835 | 20 | 6 TGAGGTAGTCGGTTGTGTGG            | miRNA | let-7b     |
| t0029858 | 23 | 6 TGAGGTAGTAGGTTGTGTGGTTC         | miRNA | let-7b     |
| t0029896 | 23 | 6 TGAGGTAGTAGATTGTGTGGTTA         | miRNA | let-7b     |
| t0029911 | 22 | 6 TGAGGTAGTAGGTTGTGTAGTA          | miRNA | let-7-5p   |
| t0029918 | 20 | 6 TGTGGTAGTAGGTTGTATAG            | miRNA | let-7      |
| t0030054 | 19 | 6 TGAGGTAGTAGGCTGTATA             | miRNA | let-7      |
| t0030063 | 26 | 6 TGAGGTATGAGGTTGTATAGTTGATC      | miRNA | let-7      |
| t0030279 | 21 | 6 TGAGGTAGGAGGGTGTATAGT           | miRNA | let-7      |
| t0030348 | 23 | 5 CAAAGTGCTGTTCGGGCAGGTAG         | miRNA | miR-93     |
| t0030352 | 20 | 5 AGGGACGGGACGCGGTGAAG            | miRNA | miR-92b*   |
| t0030373 | 22 | 5 CATTGCACTTGTCTCGGCCTGT          | miRNA | miR-92a-3p |
| t0030406 | 22 | 5 TATTGCAATTGTCCCGCCTGT           | miRNA | miR-92a    |
| t0030420 | 21 | 5 TATTGCAATTGTCCCGCCTG            | miRNA | miR-92a    |
| t0030424 | 22 | 5 TATTGCACTTGTCCCGACTGT           | miRNA | miR-92a    |
| t0030465 | 21 | 5 TATTGCACTTGTACCGCCTG            | miRNA | miR-92a    |
| t0030482 | 22 | 5 TATTGCCCTTGTCCCGCCTGT           | miRNA | miR-92a    |
| t0030204 | 21 | 5 TGTTGCACTTGTCCCGCCTG            | miRNA | miR-92a    |
| t0030168 | 22 | 5 TGGAGAGAAAGGCAGTTTATGA          | miRNA | miR-765    |
| t0030276 | 21 | 5 TGAAAGACTTGAGTAGTGAGA           | miRNA | miR-71b-5p |
| t0030626 | 19 | 5 TGGGTTTACGTTGGGAGCA             | miRNA | miR-629    |
| t0030630 | 19 | 5 AAAAAGTACTACTACTTTT             | miRNA | miR-548e   |
| t0031442 | 22 | 5 CCTCCACACCCAAGGCTTGAA           | miRNA | miR-532-3p |
| t0030686 | 22 | 5 TCTGGGCACAGGCGGAGGGACA          | miRNA | miR-5107   |
| t0031229 | 22 | 5 AAACAACATGGTGCACCTTCTT          | miRNA | miR-495    |
| t0030708 | 22 | 5 TCCAGTACTGAGCTGCCCGAG           | miRNA | miR-486-5p |
| t0030829 | 23 | 5 TCCTGTAAGTACTGAGCTGCCCGCGG      | miRNA | miR-486-5p |
| t0030850 | 23 | 5 TCCTGTAAGTACTGAGCTGGCCCGAGA     | miRNA | miR-486-5p |
| t0031276 | 23 | 5 TCCTGTAAGTACTGAGCTGCCCGAGA      | miRNA | miR-486-5p |
| t0031302 | 20 | 5 TCCTGTAAGTACTGAGCTGCCCGG        | miRNA | miR-486-5p |
| t0031491 | 21 | 5 TCCGGTACTGAGCTGCCCGGA           | miRNA | miR-486-5p |
| t0030918 | 21 | 5 TCCTGTAAGTACTGAGCTGCCCGGA       | miRNA | miR-486-5p |
| t0031078 | 20 | 5 TCCTGGACTGAGCTGCCCGG            | miRNA | miR-486-5p |
| t0031665 | 22 | 5 TCCGGTACTGAGCTGCCCGGAG          | miRNA | miR-486-5p |
| t0031518 | 22 | 5 TTCTGTAAGTACTGAGCTGCCCGCG       | miRNA | miR-486-5p |
| t0030827 | 21 | 5 TCCTGTAAGTACTGAGATGCCACGA       | miRNA | miR-486-5p |
| t0030911 | 22 | 5 TCCTGTAAGTACTGAGATGCCCGAA       | miRNA | miR-486-5p |
| t0030697 | 23 | 5 TCCTGTAAGTACTGAGCTGACCCGAGT     | miRNA | miR-486-5p |
| t0030685 | 28 | 5 TCCTGTAAGTACTGAGCTGCCCGCGACGGCA | miRNA | miR-486-5p |
| t0030712 | 23 | 5 TCCTGTAAGTACTGAGTTGCCCGAGA      | miRNA | miR-486-5p |
| t0030736 | 26 | 5 GGATTGTGTCGGCAGATCAGTATTTT      | miRNA | miR-4860   |

|          |    |                                |       |             |
|----------|----|--------------------------------|-------|-------------|
| t0030739 | 23 | 5 TGTAGAGCAGGGAGCAGGGAGCT      | miRNA | miR-4732-5p |
| t0030762 | 23 | 5 TATAGAGCAGGGAGCAGGAAGCT      | miRNA | miR-4732-5p |
| t0030777 | 23 | 5 TGTAGAGCAGGGAGCAGGAAGGT      | miRNA | miR-4732-5p |
| t0030787 | 18 | 5 AGGCTGGGTCGGTCGGGC           | miRNA | miR-4651    |
| t0031014 | 29 | 5 TGCCTCGGTCGGGCTGGGGCGCGAAGCC | miRNA | miR-4651    |
| t0031035 | 21 | 5 AGAGAAGGGTCGGGGCGGCAG        | miRNA | miR-4516    |
| t0031197 | 20 | 5 TGAGGGAGTAGGGTGTGTGG         | miRNA | miR-4510    |
| t0031213 | 23 | 5 TGAGGGAGTAGGTTGTGTGGTTG      | miRNA | miR-4510    |
| t0031226 | 23 | 5 TGAGGGAGTAGGTTGTGTGGTAT      | miRNA | miR-4510    |
| t0031257 | 19 | 5 AAACCGCTACCATTACTGA          | miRNA | miR-451     |
| t0031482 | 20 | 5 AAACCGTTACCATTCTGAG          | miRNA | miR-451     |
| t0031590 | 20 | 5 AAACCGTTACCAATACTGAG         | miRNA | miR-451     |
| t0031654 | 22 | 5 AAACCGTGACCATTACTGAGTT       | miRNA | miR-451     |
| t0030941 | 25 | 5 AAACCGTTACCATTACTGAGTTTCG    | miRNA | miR-451     |
| t0031529 | 22 | 5 AAACAGTTAACATTACTGAGTT       | miRNA | miR-451     |
| t0031593 | 25 | 5 AAACCGTTACCATTACTGAGATTAG    | miRNA | miR-451     |
| t0031123 | 20 | 5 AAACCGTTACCATTACAGAG         | miRNA | miR-451     |
| t0031476 | 22 | 5 AAACCGTTCCTACTACTGAGTT       | miRNA | miR-451     |
| t0031201 | 21 | 5 AAACATTTACCATTACTGAGT        | miRNA | miR-451     |
| t0030969 | 20 | 5 AACCCGTTACCATTACTGAG         | miRNA | miR-451     |
| t0031032 | 25 | 5 AAACCGTTACTATTACTGAGTTTAG    | miRNA | miR-451     |
| t0031394 | 22 | 5 AAACCGTTACCATTACAGAGTT       | miRNA | miR-451     |
| t0030700 | 24 | 5 AAACCGTTAGCATTACTGAGTTTA     | miRNA | miR-451     |
| t0030715 | 24 | 5 AAACAGTTACCATTACTGAGTTTA     | miRNA | miR-451     |
| t0030814 | 22 | 5 AAACCTTTACCATTATTGAGTT       | miRNA | miR-451     |
| t0030821 | 24 | 5 AAAACGTTACCATTACTGAGTTTA     | miRNA | miR-451     |
| t0030843 | 26 | 5 AAACCGTTACCATTACTGGGTTTAGT   | miRNA | miR-451     |
| t0030908 | 24 | 5 AAACCGTTACCATTACTTAGTTTA     | miRNA | miR-451     |
| t0030915 | 23 | 5 AAAGCGTTACCATTACTGAGTTT      | miRNA | miR-451     |
| t0030933 | 23 | 5 CAACCGTTACCATTACTGAGTTT      | miRNA | miR-451     |
| t0030944 | 22 | 5 TGTGACAATAGAGATGAACATG       | miRNA | miR-4504    |
| t0030949 | 21 | 5 CGCAGCATTGTACAGGGCTAT        | miRNA | miR-4289    |
| t0031026 | 19 | 5 AGAAGCATTGTACAGGGCT          | miRNA | miR-4289    |
| t0031112 | 21 | 5 TGCAGCATTGTACAGGGCTAT        | miRNA | miR-4289    |
| t0031171 | 21 | 5 CAGCAGCAGTTCATGTTTTGA        | miRNA | miR-424     |
| t0031173 | 21 | 5 CAGCAGCACTTCATGTTTTGA        | miRNA | miR-424     |
| t0031184 | 19 | 5 TGAGAGGCAGAGAGCGAGA          | miRNA | miR-423-5p  |
| t0031207 | 24 | 5 TGAGGGGCAGAGAGCGAGAGTTTT     | miRNA | miR-423-5p  |
| t0031209 | 24 | 5 TGAGGGGCAGGGAGCGAGACTTTT     | miRNA | miR-423-5p  |
| t0031306 | 23 | 5 TGAGGGGCAGAGAGCGAGCATT       | miRNA | miR-423-5p  |
| t0031431 | 20 | 5 TGAGGGGCAGAGCGCGAGAC         | miRNA | miR-423-5p  |
| t0031539 | 23 | 5 TGAGGGGCAGAGAACGAGACTTA      | miRNA | miR-423-5p  |
| t0031640 | 25 | 5 TGAGGGGCAGAGAGCGAGACTTTCA    | miRNA | miR-423-5p  |
| t0031219 | 24 | 5 TGAAGGGCAGAGAGCGAGACTTTT     | miRNA | miR-423-5p  |
| t0031093 | 24 | 5 TGAGGGGCAGAGAGTGAGACTTTT     | miRNA | miR-423-5p  |
| t0031441 | 20 | 5 TGAGGGGCAGAGAGCGGGAC         | miRNA | miR-423-5p  |
| t0031533 | 19 | 5 TGAGGTGCAGAGAGCGAGA          | miRNA | miR-423-5p  |
| t0031011 | 19 | 5 TGAGGGGCCGAGAGCGAGA          | miRNA | miR-423-5p  |
| t0031258 | 23 | 5 TGAGGGGCAGAGAGCGAGACTTA      | miRNA | miR-423-5p  |
| t0030851 | 24 | 5 TGAGGGGCAGAGAGCCAGACTTTA     | miRNA | miR-423-5p  |
| t0030925 | 24 | 5 TGAGGGGCAGAGAGCAAGACTTTT     | miRNA | miR-423-5p  |
| t0030965 | 23 | 5 TGAGGGGCAGAGCGCGAGCCTTT      | miRNA | miR-423-5p  |
| t0030999 | 22 | 5 TGAGGGGCAGTGAGCGAGACTT       | miRNA | miR-423-5p  |
| t0031050 | 24 | 5 TGAGGGGCAGAGAGGGAGACTTTT     | miRNA | miR-423-5p  |
| t0031063 | 22 | 5 TCGGAGGGCGGCGGCGGCGGCG       | miRNA | miR-3885-5p |
| t0031149 | 23 | 5 TCGGGGCGGCGGCGGCGGCGGCG      | miRNA | miR-3885-5p |
| t0031162 | 25 | 5 ACTGGACTTGGAGGCAGAAGGCATC    | miRNA | miR-378f    |
| t0031189 | 21 | 5 GCTGGACTTGGAGTCAGAAGG        | miRNA | miR-378     |

|          |    |                               |       |            |
|----------|----|-------------------------------|-------|------------|
| t0031293 | 25 | 5 ACTGGACTTGGAGACAGAAGGCATC   | miRNA | miR-378    |
| t0031298 | 25 | 5 ACTGGACTTGGAGTCAGCAGGCATC   | miRNA | miR-378    |
| t0031355 | 23 | 5 ACTGGACTTGGAGTCAGCAGGCA     | miRNA | miR-378    |
| t0031378 | 23 | 5 ACCGGACTTGGAGTCAGAAGGCA     | miRNA | miR-378    |
| t0031494 | 25 | 5 TTTGTTTCGTTCCGGCTCGCGGGAATC | miRNA | miR-375    |
| t0031497 | 27 | 5 ATATAATACAACCTGCTAAGTGAAAAA | miRNA | miR-374    |
| t0031514 | 26 | 5 AACTTTGAAGACTGAAGGGGAGAAGG  | miRNA | miR-3526   |
| t0031632 | 21 | 5 AACTTTGAAGACTGAAGTGGC       | miRNA | miR-3526   |
| t0031643 | 24 | 5 TTGAAGACTGAAGTGGAGAAGGGG    | miRNA | miR-3526   |
| t0031314 | 26 | 5 AACTTTGAAGACTGAAGTGGCGAAGG  | miRNA | miR-3526   |
| t0031403 | 24 | 5 TGAAGACTGAAGTGGAGAAGGGCT    | miRNA | miR-3526   |
| t0030894 | 24 | 5 TGAAGACTGAAGTGGAGAAGGGAT    | miRNA | miR-3526   |
| t0030877 | 21 | 5 TCAGAATCGTTCGCAATGGCT       | miRNA | miR-3495   |
| t0031433 | 21 | 5 CCCTCGAACTGTTGTGGCCAT       | miRNA | miR-3487   |
| t0031489 | 22 | 5 TCTCATACAGAAATCGCACCCG      | miRNA | miR-342-3p |
| t0031520 | 21 | 5 AAAAGCTGGGTTGAGAGGGTG       | miRNA | miR-320d   |
| t0031543 | 20 | 5 AAAGCTGGGTTGAGAGGGGG        | miRNA | miR-320d   |
| t0031406 | 24 | 5 AAAAGCTGGGTTGAGAGGGAGAAT    | miRNA | miR-320d   |
| t0031127 | 23 | 5 AAAAGCTGGGTTGAAAGGGCGTA     | miRNA | miR-320d   |
| t0030675 | 22 | 5 AAAAGATGGGTTGAGAGGGAGA      | miRNA | miR-320d   |
| t0030719 | 23 | 5 AAAAAGCTGGGTTGAGAGGGCGTA    | miRNA | miR-320d   |
| t0031003 | 23 | 5 AAAAGCTGGGTTGAGAGAGCGTA     | miRNA | miR-320d   |
| t0031091 | 23 | 5 AAAAGCTGAGTTGAGAGGGCGTT     | miRNA | miR-320d   |
| t0031114 | 21 | 5 AAAGCTGGGTTGAGAGGGAGA       | miRNA | miR-320d   |
| t0031432 | 22 | 5 AAAAGCTGGGTTGAGAGGGCGT      | miRNA | miR-320d   |
| t0031337 | 21 | 5 AAAGCTGGGTTGAGAGGGCGT       | miRNA | miR-320d   |
| t0031445 | 23 | 5 AAAAGCTGAGTTGAGAGGGCGTA     | miRNA | miR-320d   |
| t0030907 | 22 | 5 AAAAGCTGGGTTGTGAGGGCGT      | miRNA | miR-320d   |
| t0030668 | 23 | 5 AAAAGCTAGGTTGAGAGGGCGTT     | miRNA | miR-320d   |
| t0030871 | 22 | 5 AAAAGCTGGGGTGAGAGGGCAA      | miRNA | miR-320b   |
| t0030970 | 22 | 5 AAAAGCTGGGTTGGGAGGGCAA      | miRNA | miR-320b   |
| t0031068 | 22 | 5 AAAAGCTGGGTGGAGAGGGCGA      | miRNA | miR-320a   |
| t0031115 | 21 | 5 AAAGGCTGGGTTGAGAGGGCG       | miRNA | miR-320a   |
| t0031120 | 23 | 5 AAAAGCTGGGTTGAAAGGGCGAT     | miRNA | miR-320a   |
| t0031180 | 22 | 5 ATAAGCTGGGTTGAGAGGGCGA      | miRNA | miR-320a   |
| t0031283 | 18 | 5 AAAAGCTGGGTTGAGAGG          | miRNA | miR-320a   |
| t0031349 | 23 | 5 AAAAGCTAGGTTGAGAGGGCGAT     | miRNA | miR-320a   |
| t0031454 | 23 | 5 AAAGGCTGGGTTGAGAGGGCGAT     | miRNA | miR-320a   |
| t0031462 | 23 | 5 AAAAGCTGGGTTGAGAGCGCGAT     | miRNA | miR-320a   |
| t0031486 | 23 | 5 AAAAAGCTGGGTTGAGAGGGCGAT    | miRNA | miR-320a   |
| t0031569 | 23 | 5 AAAAGCTGGGTTGAGAGCGCGAA     | miRNA | miR-320a   |
| t0031584 | 22 | 5 TAAAGCTGGGTTGAGAGGGCGA      | miRNA | miR-320a   |
| t0030703 | 23 | 5 AAAAGCCGGGTTGAGAGGGCGAT     | miRNA | miR-320a   |
| t0031044 | 22 | 5 AAAAGCTGGCTTGAGAGGGCGA      | miRNA | miR-320a   |
| t0030692 | 23 | 5 AAAAGCTGGGGTGAGAGGGCGAG     | miRNA | miR-320a   |
| t0030745 | 21 | 5 AAAAGCTGGGTTGAAAGGGCG       | miRNA | miR-320a   |
| t0030790 | 23 | 5 AAAAGCTGGATTGAGAGGGCGAT     | miRNA | miR-320a   |
| t0030865 | 23 | 5 AAAAGCTGGGTTGCGAGGGCGAT     | miRNA | miR-320a   |
| t0030906 | 21 | 5 TATTGCACACTTAAGTTGC         | miRNA | miR-32     |
| t0030928 | 18 | 5 TGGGACAAGAGGACGGTT          | miRNA | miR-3122   |
| t0030997 | 26 | 5 TGTA AACATCCCCGACTGGAAGCCTC | miRNA | miR-30d    |
| t0031016 | 19 | 5 TGTA AACATCCTACACTCT        | miRNA | miR-30c    |
| t0031031 | 20 | 5 GCGCGCGGGTTCGGGGGGCGG       | miRNA | miR-2981   |
| t0031191 | 23 | 5 CGGCGCGGGGCGGCGGAGGGGCC     | miRNA | miR-2885   |
| t0031221 | 22 | 5 TTCAAGCAATTCAGGATAGGTT      | miRNA | miR-26b    |
| t0031353 | 22 | 5 TTCAAGGAATCCAGGATAGGCT      | miRNA | miR-26a    |
| t0031418 | 22 | 5 CTCAAGTAATCCAGGATAGGCT      | miRNA | miR-26a    |
| t0031512 | 22 | 5 TTCAAGTAATCCGGGATAGGCT      | miRNA | miR-26a    |

|          |    |                              |       |              |
|----------|----|------------------------------|-------|--------------|
| t0031577 | 19 | 5 TTCAAGTAATCCAGGATAG        | miRNA | miR-26a      |
| t0031610 | 22 | 5 TTCAAGTAATCCAGGATAGGGT     | miRNA | miR-26a      |
| t0031644 | 21 | 5 TGAGGGGAGGAGTTGTGTGGT      | miRNA | miR-265      |
| t0031634 | 23 | 5 CATTGCACTTGTCTCGGGCTGAA    | miRNA | miR-25       |
| t0031317 | 22 | 5 CCTTGCCTTGTCTCGGTCTGA      | miRNA | miR-25       |
| t0031088 | 22 | 5 CATTGCACTTGTCTCGGTCTTT     | miRNA | miR-25       |
| t0030818 | 21 | 5 CATTGCACTTGTCTCGGACTG      | miRNA | miR-25       |
| t0030725 | 22 | 5 CATTGCACTTGTGTCTCGGTCTGA   | miRNA | miR-25       |
| t0031065 | 21 | 5 CATTGCACTTGTCTCGATCTG      | miRNA | miR-25       |
| t0031554 | 26 | 5 CATTGCACTTGTCTCGGTCTGAGTCG | miRNA | miR-25       |
| t0030974 | 23 | 5 CATTGCACTTGTCTCGGCCTGAA    | miRNA | miR-25       |
| t0031275 | 22 | 5 TGGCTCAGTTCAGCAGGAAAAG     | miRNA | miR-24b      |
| t0031346 | 21 | 5 TGGCTCAGTTCAGCAGGCACA      | miRNA | miR-24       |
| t0031390 | 21 | 5 AGCTACATCTGGCTACTGGGG      | miRNA | miR-222      |
| t0031517 | 21 | 5 AGCTACATTGTCTGCTGGGGT      | miRNA | miR-221      |
| t0030887 | 26 | 5 GACTGGGGCGGTACATCTGTTAAACA | miRNA | miR-219-2-3p |
| t0030891 | 23 | 5 TTGGGGAAACGGCCGCTGAGGGA    | miRNA | miR-2110     |
| t0031021 | 22 | 5 TAGCTTATCAGACTGATGTTGC     | miRNA | miR-21       |
| t0031033 | 25 | 5 TGTAATGTAAGGAAGTGTGTGGATC  | miRNA | miR-206      |
| t0031069 | 21 | 5 CTGACTTATGAATTGACAGCC      | miRNA | miR-192      |
| t0031137 | 22 | 5 TGACCTATGAATTGACAGCCAA     | miRNA | miR-192      |
| t0031167 | 21 | 5 CTGACCTATGAATTGACAGAC      | miRNA | miR-192      |
| t0031364 | 20 | 5 CAACGGAATCCCAAAAAGCAC      | miRNA | miR-191      |
| t0031652 | 22 | 5 CGACGGAATCCCAAAAAGCAGCT    | miRNA | miR-191      |
| t0031022 | 22 | 5 AACAGAATCCCAAAAAGCAGCTG    | miRNA | miR-191      |
| t0031307 | 21 | 5 AACGGAATCCCAAAAAGAAGCT     | miRNA | miR-191      |
| t0031034 | 22 | 5 CACCGGAATCCCAAAAAGCAGCT    | miRNA | miR-191      |
| t0031463 | 22 | 5 CAACGTAATCCCAAAAAGCAGCT    | miRNA | miR-191      |
| t0031405 | 22 | 5 CAACGGAATCCCAAGAGCAGCT     | miRNA | miR-191      |
| t0031048 | 20 | 5 CAACGGAATCCAAAAAGCAG       | miRNA | miR-191      |
| t0030768 | 21 | 5 CAACGGAATACCAAAAAGCAGC     | miRNA | miR-191      |
| t0031185 | 23 | 5 CAACGGAATCCCAAAAGGCAGCTG   | miRNA | miR-191      |
| t0030783 | 23 | 5 CAACGGAATCCCAAAAAGCAGCAG   | miRNA | miR-191      |
| t0030844 | 22 | 5 CAACGGAATCCCAAAAACAGCT     | miRNA | miR-191      |
| t0031236 | 23 | 5 GGGAGAGAAAGGCAGTTCCTGAA    | miRNA | miR-185      |
| t0030699 | 23 | 5 TGGAGAGAGAGGCAGTTCCTGAT    | miRNA | miR-185      |
| t0030808 | 20 | 5 TGGAGCGAAAGGCAGTTCCT       | miRNA | miR-185      |
| t0030885 | 23 | 5 TAGAGAGAAAGGCAGTTCCTGAT    | miRNA | miR-185      |
| t0030903 | 23 | 5 TGGAGAGACAGGCAGTTCCTGAA    | miRNA | miR-185      |
| t0031130 | 21 | 5 TGAGAGAAAGGAAGTTCCTGA      | miRNA | miR-185      |
| t0031139 | 23 | 5 TGGAGAGAAGGGCAGTTCCTGAT    | miRNA | miR-185      |
| t0031143 | 20 | 5 TGGAGAGAAAGACAGTTCCT       | miRNA | miR-185      |
| t0031182 | 23 | 5 TGGAGAGAAAGGCCGTTTCTGAT    | miRNA | miR-185      |
| t0031366 | 23 | 5 TGGAGAGAAAGGGAGTTCCTGAG    | miRNA | miR-185      |
| t0031508 | 20 | 5 TGGAGAGAAAAGCAGTTCCT       | miRNA | miR-185      |
| t0031547 | 23 | 5 TGGAGACAAAGGCAGTTCCTGAA    | miRNA | miR-185      |
| t0031587 | 21 | 5 AGGTAGATAGAACAGGGCTTG      | miRNA | miR-1839     |
| t0030696 | 23 | 5 AAGGGAGATAGAACAGGTCTTGA    | miRNA | miR-1839     |
| t0030701 | 22 | 5 AAAGGTAGATAGAACAGGTCTT     | miRNA | miR-1839     |
| t0030939 | 18 | 5 TATGGCACTGGTAGAATT         | miRNA | miR-183      |
| t0030993 | 21 | 5 TTGAGGGAGTAGATTGTATAG      | miRNA | miR-1827     |
| t0031313 | 22 | 5 TGAGGCAGTAGATTGTATAGGT     | miRNA | miR-1827     |
| t0031361 | 21 | 5 TGAGGGGAGTAGATTGTATATT     | miRNA | miR-1827     |
| t0031391 | 22 | 5 TGAGGGGAGTAGAGTGTATAGTT    | miRNA | miR-1827     |
| t0031424 | 25 | 5 TGAGGGGAGTAGGTTGTATAGTTATC | miRNA | miR-1827     |
| t0031451 | 21 | 5 TGAGGGGAATAGATTGTATAGT     | miRNA | miR-1827     |
| t0031499 | 22 | 5 TGAGGGGAGTAGCTTGTATAGTT    | miRNA | miR-1827     |
| t0031598 | 21 | 5 TGAGGGGGTAGATTGTATAGT      | miRNA | miR-1827     |

|          |    |                                |       |          |
|----------|----|--------------------------------|-------|----------|
| t0031611 | 20 | 5 AACATTTATTGCTGTCGGTG         | miRNA | miR-181b |
| t0030938 | 21 | 5 CAAAGTGCTTACAGTGCCGGT        | miRNA | miR-17   |
| t0031240 | 30 | 5 GGGGGCGGGGAGCGGTCTGGGCGGCGGC | miRNA | miR-1607 |
| t0031372 | 25 | 5 GGACGGGGAGCGGTCTGGGCGGCGGC   | miRNA | miR-1607 |
| t0031039 | 20 | 5 TAGCAGCACGTAAGTATTGG         | miRNA | miR-16   |
| t0030897 | 20 | 5 TAGCAGCACGTAATATTGC          | miRNA | miR-16   |
| t0031029 | 23 | 5 TAGAAGCACGTAATATTGGCGT       | miRNA | miR-16   |
| t0031181 | 22 | 5 TAGCAGTACGTAATATTGGAG        | miRNA | miR-16   |
| t0031210 | 23 | 5 TAGCAGCAAGTAATATTGGCGT       | miRNA | miR-16   |
| t0031268 | 23 | 5 TAGCAGCACGTAATATTGCCGA       | miRNA | miR-16   |
| t0031393 | 23 | 5 TAGCAGCACGGAAATATTGGCGT      | miRNA | miR-16   |
| t0031487 | 22 | 5 TAGCAGCACGTAAGATTGGCG        | miRNA | miR-16   |
| t0031506 | 19 | 5 TAGGAGCACATCATGGTTT          | miRNA | miR-15b  |
| t0031392 | 19 | 5 TAGCAGCACATGATGGTTT          | miRNA | miR-15b  |
| t0031575 | 22 | 5 TAGCAGCAGATCATGGTTTACA       | miRNA | miR-15b  |
| t0030711 | 21 | 5 TAGCAGCACATCATGGTTTGT        | miRNA | miR-15b  |
| t0031623 | 20 | 5 TAGCTGCACATCATGGTTTA         | miRNA | miR-15b  |
| t0030785 | 20 | 5 TAGCAGCACATCAAGGTTTA         | miRNA | miR-15b  |
| t0030868 | 20 | 5 TAGCAGCACATCATGGTTCA         | miRNA | miR-15b  |
| t0030919 | 20 | 5 TAGCCGCACATAATGGTTTG         | miRNA | miR-15a  |
| t0030927 | 22 | 5 TAGCAGCACGTAATGGTTTGTG       | miRNA | miR-15a  |
| t0031101 | 21 | 5 TAGCACCACATAATGGTTTGT        | miRNA | miR-15a  |
| t0031142 | 19 | 5 TAGCAGCACATAATGGATT          | miRNA | miR-15a  |
| t0031354 | 20 | 5 TAGCAGCTCATAATGGTTTG         | miRNA | miR-15a  |
| t0031642 | 18 | 5 TAGCAGCACATAATGGGT           | miRNA | miR-15a  |
| t0030705 | 20 | 5 TAGCAGCCCATAATGGTTTG         | miRNA | miR-15a  |
| t0030782 | 21 | 5 TAGCAGCACAAAATGGTTTGT        | miRNA | miR-15a  |
| t0030833 | 22 | 5 GGATATCATCATACACTGTAAG       | miRNA | miR-144* |
| t0030952 | 19 | 5 CTACAGTATAGATGATGGA          | miRNA | miR-144  |
| t0031077 | 25 | 5 TACAGTATAGATGATGTAATAAAAA    | miRNA | miR-144  |
| t0031513 | 23 | 5 TGAGATGAGGCACTGTAGCTATC      | miRNA | miR-143  |
| t0031603 | 23 | 5 TGAGATGAAGCACTGTAGCTTTC      | miRNA | miR-143  |
| t0030676 | 20 | 5 CCAATAAAGTAGAAAGCACT         | miRNA | miR-142  |
| t0030744 | 18 | 5 CCTATAAAGTAGAAAGCA           | miRNA | miR-142  |
| t0030831 | 24 | 5 TACCACAGGGTAGAACCTCGGACA     | miRNA | miR-140  |
| t0030861 | 23 | 5 TACCACAGCGTAGAACACGGAC       | miRNA | miR-140  |
| t0030882 | 22 | 5 TACCACAGGGGAGAACCAAGGA       | miRNA | miR-140  |
| t0030888 | 23 | 5 TACCACAGGGTAGAACTCCGGAA      | miRNA | miR-140  |
| t0031303 | 22 | 5 TACCACAGGGTAGAAACCCGGA       | miRNA | miR-140  |
| t0031329 | 23 | 5 TACCATAGGGTAGAACCCCGGAC      | miRNA | miR-140  |
| t0031287 | 23 | 5 TACCACAGGCTAGAACCCCGGAC      | miRNA | miR-140  |
| t0030743 | 23 | 5 TACCACAGGGTAGAAGCACGGAA      | miRNA | miR-140  |
| t0031215 | 22 | 5 ACCACAGGGTAGAGCCACGGAT       | miRNA | miR-140  |
| t0031262 | 22 | 5 CCACAGGGTAGAATCACGGACA       | miRNA | miR-140  |
| t0031567 | 24 | 5 TACCACAGGGGAGAACCACGGACG     | miRNA | miR-140  |
| t0030807 | 24 | 5 TACCACAGGGTAGAACCCCGGAAT     | miRNA | miR-140  |
| t0031573 | 24 | 5 TACCACAGGGTAGAACACGAACA      | miRNA | miR-140  |
| t0030693 | 22 | 5 ACCACAGGGTAGGACCACGGAA       | miRNA | miR-140  |
| t0030698 | 24 | 5 TACCACACGGTAGAACACGGACA      | miRNA | miR-140  |
| t0030714 | 23 | 5 ACCACGGGGTAGAACACGGACA       | miRNA | miR-140  |
| t0030728 | 23 | 5 AACCACAGGGTAGAACACGGAA       | miRNA | miR-140  |
| t0030751 | 23 | 5 TACCACAGGGTAGAAGCACGGAC      | miRNA | miR-140  |
| t0030789 | 23 | 5 TCCCACAGGGTAGAACACGGAA       | miRNA | miR-140  |
| t0030832 | 23 | 5 TACCACAGGGTAGAACACGTAA       | miRNA | miR-140  |
| t0030858 | 23 | 5 TACCACACGGTAGAACACGGAA       | miRNA | miR-140  |
| t0030862 | 22 | 5 TTCCACAGGGTAGAACACGGAA       | miRNA | miR-140  |
| t0030864 | 20 | 5 ACCACAGGGCAGAACCACGG         | miRNA | miR-140  |
| t0030942 | 22 | 5 ACCACAGGGTAGCACCACGGAA       | miRNA | miR-140  |



|          |    |                              |       |           |
|----------|----|------------------------------|-------|-----------|
| t0030946 | 21 | 5 TACCACAGGGCAGAACCACGG      | miRNA | miR-140   |
| t0030967 | 23 | 5 TACCACAGGGTAGAACCAGGGAA    | miRNA | miR-140   |
| t0030976 | 24 | 5 TACCACAGGGTAGAAACACGGACG   | miRNA | miR-140   |
| t0031005 | 22 | 5 ACCACAGGGTAGAACC GCGGAT    | miRNA | miR-140   |
| t0031045 | 23 | 5 CACCACAGGGTAGAACCACGGAT    | miRNA | miR-140   |
| t0031095 | 21 | 5 TACCACAGGGTAGAACC GCGG     | miRNA | miR-140   |
| t0031104 | 22 | 5 TACAACAGGGTAGAAACACGG A    | miRNA | miR-140   |
| t0031108 | 24 | 5 TACCACAGCGTAGAACCACGGACA   | miRNA | miR-140   |
| t0031125 | 23 | 5 TACCACAGGGTAGAACAACGGAG    | miRNA | miR-140   |
| t0031128 | 22 | 5 AGCACAGGGTAGAACCACGGAC     | miRNA | miR-140   |
| t0031135 | 23 | 5 GCCACAGGGTAGAACCACGGACA    | miRNA | miR-140   |
| t0031138 | 21 | 5 TACCACAGGGTAGAATCACGG      | miRNA | miR-140   |
| t0031188 | 24 | 5 TACCACAGGGTAGCACCACGGACA   | miRNA | miR-140   |
| t0031196 | 23 | 5 ACCACAGGGAAGAACCACGGACT    | miRNA | miR-140   |
| t0031238 | 23 | 5 GCCACAGGGTAGAACCACGGACG    | miRNA | miR-140   |
| t0031270 | 23 | 5 TACCACAGGGTAAACCACGGAT     | miRNA | miR-140   |
| t0031316 | 22 | 5 CAGGGCAATGTTAAAAGGGCAT     | miRNA | miR-130a  |
| t0031341 | 24 | 5 TCTGGGCAACAAAGGGAGACCTGA   | miRNA | miR-1285  |
| t0031377 | 26 | 5 TCGTACCGTGAGTAATAATGCGAATC | miRNA | miR-126   |
| t0031385 | 19 | 5 AGGATGAGCAAAGAAAGTA        | miRNA | miR-1255a |
| t0031396 | 19 | 5 GTGAGGACTCGGGAGGGGG        | miRNA | miR-1224  |
| t0031414 | 21 | 5 GTGAGGACTCGGGAGGGGGAG      | miRNA | miR-1224  |
| t0031519 | 22 | 5 AGCAGCATTGTACAGGGCTTTG     | miRNA | miR-107b  |
| t0031523 | 22 | 5 AGCAGCATTGTACAGGGCTCTT     | miRNA | miR-107   |
| t0031531 | 20 | 5 TAAAGCGCTGACAGTGCAGA       | miRNA | miR-106b  |
| t0031550 | 21 | 5 TAAAGTGCTGACAGTGCAGCT      | miRNA | miR-106b  |
| t0031562 | 21 | 5 TAAAGTGCTGACAGTGCAGAC      | miRNA | miR-106b  |
| t0031638 | 22 | 5 CGCAGCATTGTACAGGGCTATG     | miRNA | miR-103a  |
| t0031656 | 23 | 5 AGCAGCATTGTACACGGCTATGA    | miRNA | miR-103a  |
| t0030991 | 21 | 5 AGCAGCATTGTAGAGGGCTAT      | miRNA | miR-103a  |
| t0031325 | 20 | 5 AGCAGCATTGTACAGGGCTG       | miRNA | miR-103a  |
| t0031299 | 23 | 5 AGCAGCATTGTAGAGGGCTATGA    | miRNA | miR-103a  |
| t0030673 | 23 | 5 AGCAGCATTGTACAGGGATATGT    | miRNA | miR-103a  |
| t0030694 | 21 | 5 AACAGTACTGTGATAACTGAA      | miRNA | miR-101c  |
| t0031010 | 21 | 5 GTACAGTACTATGATAACTGA      | miRNA | miR-101b  |
| t0031289 | 21 | 5 TACCGTACTGTGATAACTGAA      | miRNA | miR-101   |
| t0030860 | 21 | 5 TACAGTACTGTGATCACTGAA      | miRNA | miR-101   |
| t0030707 | 21 | 5 GTACAGTACTGAGATAACTGA      | miRNA | miR-101   |
| t0030947 | 22 | 5 TAAAGTACTGTGATAACTGAAG     | miRNA | miR-101   |
| t0031370 | 22 | 5 GTACAGTACTGTGATGACTGAA     | miRNA | miR-101   |
| t0030748 | 20 | 5 TACAGTACTGTGATAATTGA       | miRNA | miR-101   |
| t0030763 | 21 | 5 TACAGTACTGTGATAAGTGAA      | miRNA | miR-101   |
| t0030879 | 21 | 5 GTACAGGACTGTGATAACTGA      | miRNA | miR-101   |
| t0030920 | 21 | 5 TACAGTCCTGTGATAACTGAA      | miRNA | miR-101   |
| t0031064 | 22 | 5 GTACAGTACTGTAATAACTGAA     | miRNA | miR-101   |
| t0031630 | 20 | 5 TACAGTACTGCGATAACTGA       | miRNA | miR-101   |
| t0030817 | 22 | 5 TACAGTACTGGGATAACTGAAA     | miRNA | miR-101   |
| t0030909 | 22 | 5 GTACAGTACTGTGTTAACTGAA     | miRNA | miR-101   |
| t0030702 | 21 | 5 GTACAGTACCGTGATAACTGA      | miRNA | miR-101   |
| t0030729 | 22 | 5 TACAGTACCGTGATAACTGAAG     | miRNA | miR-101   |
| t0030756 | 22 | 5 GTCCAGTACTGTGATAACTGAA     | miRNA | miR-101   |
| t0031001 | 23 | 5 TGAGGTAGTAGATTGAATAGTTA    | miRNA | let-7k    |
| t0031082 | 20 | 5 TGAGGTAGTAGATTGTGCAG       | miRNA | let-7j    |
| t0031099 | 22 | 5 TGAGGTAGTAGTTTCGTGCTGTT    | miRNA | let-7i    |
| t0031205 | 22 | 5 TGAGGTAGTAGTTTGTGCTGTC     | miRNA | let-7i    |
| t0031312 | 22 | 5 TGAGGTCGTAGTTTGTGCTGTT     | miRNA | let-7i    |
| t0031398 | 21 | 5 TGAGGTAGTAGTTTGTGCGGT      | miRNA | let-7i    |
| t0031416 | 22 | 5 TGAGATAGTAGTTTGTGCTGTT     | miRNA | let-7i    |

|          |    |                              |       |           |
|----------|----|------------------------------|-------|-----------|
| t0031443 | 22 | 5 TGAGGTAGTCGTTTGTGCTGTT     | miRNA | let-7i    |
| t0031450 | 22 | 5 TGAGGTAGTAGCTTGTGCTGTT     | miRNA | let-7i    |
| t0031452 | 20 | 5 TGAGGAAGTAGTTTGTGCTG       | miRNA | let-7i    |
| t0031478 | 20 | 5 TGAGGTAGTAGTTTATGCTG       | miRNA | let-7i    |
| t0031493 | 21 | 5 TGGGGTAGTAGTTTGTGCTGT      | miRNA | let-7i    |
| t0031646 | 21 | 5 TGAGGTAGTCGTTTGTACAGT      | miRNA | let-7g    |
| t0031589 | 22 | 5 TGAGGGAGGAGTTTGTACAGTT     | miRNA | let-7g    |
| t0031239 | 20 | 5 TGAGGTAGTAGTTTGTACTG       | miRNA | let-7g    |
| t0030774 | 26 | 5 TGAGGTAGTAGTTTGTACAGTCGGTT | miRNA | let-7g    |
| t0030869 | 22 | 5 TGAGGTTGTAGTTTGTACAGTT     | miRNA | let-7g    |
| t0031080 | 21 | 5 TGAGGTAGTAGTTTGGACAGT      | miRNA | let-7g    |
| t0031118 | 22 | 5 TGAGGTAGTAGATTGTATAGCA     | miRNA | let-7f-5p |
| t0031157 | 21 | 5 TGAGGTAGTAGATTGTATAAC      | miRNA | let-7f-5p |
| t0031160 | 20 | 5 TGAGGTAGTAGATTGTACTT       | miRNA | let-7f-5p |
| t0031230 | 21 | 5 GAGGTAGTGGATTGTATAGTT      | miRNA | let-7f-5p |
| t0031259 | 22 | 5 TGAGGTAGTGGATTGTGTAGTT     | miRNA | let-7f-5p |
| t0031459 | 23 | 5 TGCGGTAGTAGATTGTATAGTTT    | miRNA | let-7f    |
| t0031488 | 23 | 5 TGAGGTAGTAGATTGTATCGTTG    | miRNA | let-7f    |
| t0030945 | 19 | 5 TGAGGTAGTAGATTGTAAA        | miRNA | let-7f    |
| t0030948 | 24 | 5 TGAGGTAGTAGATTGTATAGTAAT   | miRNA | let-7f    |
| t0031199 | 23 | 5 TGAGGTAGTAGATTGTTAGTTA     | miRNA | let-7f    |
| t0031286 | 23 | 5 TGAGGTAGTAGTTTGTATAGTTG    | miRNA | let-7f    |
| t0031383 | 23 | 5 CGAGGTAGTAGATTGTATAGTTT    | miRNA | let-7f    |
| t0031474 | 20 | 5 GAGGAAGTAGATTGTATAGT       | miRNA | let-7f    |
| t0030770 | 23 | 5 TGAGGTAGTAGATTGTATAGCTT    | miRNA | let-7f    |
| t0031098 | 23 | 5 TGAGATAGTAGATTGTATAGTTA    | miRNA | let-7f    |
| t0031285 | 21 | 5 GGGGTAGTAGATTGTATAGTT      | miRNA | let-7f    |
| t0031415 | 22 | 5 TGAGGTAGAAGATTGTATAGTA     | miRNA | let-7f    |
| t0031648 | 19 | 5 TGAGGTAGTAGATTGTATC        | miRNA | let-7f    |
| t0030669 | 23 | 5 TGAGGTAGAAGATTGTATAGTTA    | miRNA | let-7f    |
| t0030730 | 22 | 5 TAAGGTAGTAGATTGTATAGTA     | miRNA | let-7f    |
| t0030737 | 19 | 5 TGAGGTAATAGATTGTATA        | miRNA | let-7f    |
| t0030788 | 23 | 5 TGAGGTAGTAGATTGTCTAGTTG    | miRNA | let-7f    |
| t0030823 | 23 | 5 CTGAGGTGGTAGATTGTATAGTT    | miRNA | let-7f    |
| t0030835 | 23 | 5 TGAGGTAGCAGATTGTATAGTTA    | miRNA | let-7f    |
| t0030849 | 22 | 5 TGAGGTAGTAGATTGTGGAGTT     | miRNA | let-7f    |
| t0030855 | 22 | 5 TGAGGTAGTAGCTTGTATAGGT     | miRNA | let-7f    |
| t0030922 | 23 | 5 TGAGGTAGTAGATTGTAAAGTTT    | miRNA | let-7f    |
| t0031103 | 22 | 5 TGAGGTGGTAGATTGTATAGTA     | miRNA | let-7f    |
| t0031145 | 21 | 5 AGAGGTAGTAGGTTGCAAAGT      | miRNA | let-7d    |
| t0031159 | 20 | 5 AGAGGTAGTAGGTCGCATAG       | miRNA | let-7d    |
| t0031169 | 21 | 5 AGAGGTAGTAGGTTGGATAGT      | miRNA | let-7d    |
| t0031244 | 22 | 5 AGAGGGAGTAGGGTGCATAGTT     | miRNA | let-7d    |
| t0031264 | 22 | 5 AGAGGTAGTAGGGTGAATAGTT     | miRNA | let-7d    |
| t0031294 | 21 | 5 AGAGGTAATAGGTTGCATAGT      | miRNA | let-7d    |
| t0031300 | 24 | 5 TGAGGTAGTAGGTTGTGTGGTTCA   | miRNA | let-7b    |
| t0031315 | 24 | 5 CGAGGTAGTAGGTTGTGTGGTTAA   | miRNA | let-7b    |
| t0031327 | 23 | 5 TGAGGTAGTAGGTCGTGTGGTTA    | miRNA | let-7b    |
| t0031339 | 19 | 5 TGAGGAAGTAGGTTGTGTG        | miRNA | let-7b    |
| t0031444 | 24 | 5 TGAGGTAGTAGGTTGTGGGTTAT    | miRNA | let-7b    |
| t0031561 | 19 | 5 TGAGGTAGTAGGCTGTGTG        | miRNA | let-7b    |
| t0031614 | 23 | 5 TGAGGCAGTAGGTTGTGTGGTAA    | miRNA | let-7b    |
| t0030742 | 23 | 5 TGCGGTAGTAGGTTGTGTGGTTT    | miRNA | let-7b    |
| t0030781 | 22 | 5 TGAGGTAATAGGTTGTGTGGTA     | miRNA | let-7b    |
| t0030916 | 21 | 5 TGAGGTAGTAGGTTGTGGGGA      | miRNA | let-7b    |
| t0031151 | 20 | 5 TGAGGTAGTAAGTTGTGTGG       | miRNA | let-7b    |
| t0031446 | 23 | 5 TGAGGTAGTAGGTTGTATGGTTT    | miRNA | let-7b    |
| t0031483 | 19 | 5 TGAGGTAGTAGGTTATGTG        | miRNA | let-7b    |

|          |    |                                |       |             |
|----------|----|--------------------------------|-------|-------------|
| t0030671 | 19 | 5 TGAGGTAGCAGGTTGTGTG          | miRNA | let-7b      |
| t0030733 | 23 | 5 TGAGATAGTAGGTTGTGTGGTTA      | miRNA | let-7b      |
| t0030753 | 20 | 5 TAGTAGTAGGTTGTGTGGTT         | miRNA | let-7b      |
| t0030847 | 23 | 5 TGAGGTAGTAGATTGTGTGGTTT      | miRNA | let-7b      |
| t0030876 | 23 | 5 TGAGGTAGTAGGTTGCGTGGTTA      | miRNA | let-7b      |
| t0030924 | 22 | 5 TGAGGTAGTAGGTTATGTGGTA       | miRNA | let-7b      |
| t0030951 | 20 | 5 TGAGGTAGTAGGTTGTATTG         | miRNA | let-7       |
| t0031015 | 20 | 5 TGAGCTAGTAGGTTGTATAG         | miRNA | let-7       |
| t0031132 | 20 | 5 TGAGGTAGTTGGTTGTATAG         | miRNA | let-7       |
| t0031225 | 22 | 5 TGAGGTGGTGGGTTGTATAGTT       | miRNA | let-7       |
| t0031235 | 21 | 4 CAAAGTGCTGTTTCGTGCAGGG       | miRNA | miR-93      |
| t0031308 | 23 | 4 CAAAGTGCTGTTTCATGCAGGTAG     | miRNA | miR-93      |
| t0031336 | 21 | 4 CAAAGGGCTGTTTCGTGCAGGT       | miRNA | miR-93      |
| t0031386 | 23 | 4 CAAAGAGCTGTTTCGTGCAGGTAG     | miRNA | miR-93      |
| t0031410 | 22 | 4 CAAAGTGCTATTCGTGCAGGTA       | miRNA | miR-93      |
| t0031530 | 23 | 4 TATTGCACTTGTCCCGCCTGGT       | miRNA | miR-92b-3p  |
| t0031548 | 22 | 4 AGGGACGGGACGCGGGCAGTG        | miRNA | miR-92b*    |
| t0031571 | 23 | 4 TATTGCACTTGTCCCGCCTTTTG      | miRNA | miR-92b     |
| t0031572 | 22 | 4 TATTGCACTTGTCTCGGTCTGT       | miRNA | miR-92a     |
| t0030738 | 23 | 4 TATTGCAATTGTCCCGCCTGTA       | miRNA | miR-92a     |
| t0030883 | 22 | 4 TATTGCACTTTTCCCGCCTGT        | miRNA | miR-92a     |
| t0031320 | 21 | 4 TATTGCACTTGTCCCGCATG         | miRNA | miR-92a     |
| t0031473 | 21 | 4 TATTGCACTTGTCCAGGCCTG        | miRNA | miR-92a     |
| t0032294 | 19 | 4 TGGAGAGAAAGGAAGTTGA          | miRNA | miR-765     |
| t0032355 | 21 | 4 TGGAGAGAAAGGAAGTTCATG        | miRNA | miR-765     |
| t0032578 | 26 | 4 AGGGCGCGCGGGTTCGGGGCGGCGGCA  | miRNA | miR-638     |
| t0032759 | 22 | 4 TACGTCATCGTTGTCATCGTCC       | miRNA | miR-598     |
| t0032851 | 22 | 4 TGGTGCAAAAGTAATGGCGGTT       | miRNA | miR-548q    |
| t0032357 | 22 | 4 AAAAACCACAATTACTTTTGCA       | miRNA | miR-548aa   |
| t0031880 | 24 | 4 TCTGGGCACAGGCGGATGGACCGA     | miRNA | miR-5107    |
| t0031746 | 24 | 4 TCTGGGCACAGGCGGATGGAAAGA     | miRNA | miR-5107    |
| t0031755 | 23 | 4 TCCTGTACTAAGCTGCCCCGAGT      | miRNA | miR-486-5p  |
| t0031852 | 20 | 4 TCCCGTACTGAGCTGCCCCG         | miRNA | miR-486-5p  |
| t0031862 | 20 | 4 TCCTATACTGAGCTGCCCCG         | miRNA | miR-486-5p  |
| t0032661 | 26 | 4 TCCTGTACTGAGCTGCCCCGCGGTCC   | miRNA | miR-486-5p  |
| t0032950 | 23 | 4 TCCCGTACTGAGCTGCCCCGAGA      | miRNA | miR-486-5p  |
| t0031811 | 22 | 4 TCCTGTACGGAGCTGCCCCGAG       | miRNA | miR-486-5p  |
| t0032522 | 20 | 4 CCCTGTACTGAGCTGCCCCG         | miRNA | miR-486-5p  |
| t0032431 | 21 | 4 TCCTGTTCTGAGCTGCCCCGA        | miRNA | miR-486-5p  |
| t0032301 | 23 | 4 TCCTGTAATGAGCTGCCCCGAGT      | miRNA | miR-486-5p  |
| t0032045 | 20 | 4 TCCTGCACTGAGCTGCCCCG         | miRNA | miR-486-5p  |
| t0032586 | 30 | 4 TCCTGTACTGAGCTGCCCCGAGCGAAGC | miRNA | miR-486-5p  |
| t0032071 | 22 | 4 TCTTGTACTGAGCTGCACCGAG       | miRNA | miR-486-5p  |
| t0032393 | 21 | 4 TCCAGTACTGAGCTGCCCCGA        | miRNA | miR-486-5p  |
| t0031693 | 20 | 4 TCCTGTATTGAGCTGCCCCG         | miRNA | miR-486-5p  |
| t0031884 | 26 | 4 TCCTGTACTGAGCTGCCCCGAGAAGT   | miRNA | miR-486-5p  |
| t0031910 | 22 | 4 TCCTGTACTGAGCTGTCCCGCG       | miRNA | miR-486-5p  |
| t0031947 | 20 | 4 TCCTGTACTGAGCTACCCCG         | miRNA | miR-486-5p  |
| t0032035 | 21 | 4 TCCTGTACGGAGCTGCCCCGA        | miRNA | miR-486-5p  |
| t0032128 | 26 | 4 TCCTGTACTGAGCTGCCCCGCGAAGA   | miRNA | miR-486-5p  |
| t0032156 | 21 | 4 TCCTGTACTGAGCTCCCCCGC        | miRNA | miR-486-5p  |
| t0032227 | 23 | 4 TCCTGTACTGAGGTGCCCCGAGA      | miRNA | miR-486-5p  |
| t0032259 | 21 | 4 TCTTGTACTGAGCTGCCCCGC        | miRNA | miR-486-5p  |
| t0032315 | 25 | 4 TCCTGTACTGAGCTGCCCCGAGGGA    | miRNA | miR-486-5p  |
| t0032385 | 23 | 4 TCCTGTACTGAGCTGCCCTGAGA      | miRNA | miR-486-5p  |
| t0032437 | 22 | 4 TCAGGCAAAGGGATATTTACAG       | miRNA | miR-4742-5p |
| t0032461 | 23 | 4 TGTAGAGCAAGGAGCAGGAAAGCT     | miRNA | miR-4732-5p |
| t0032489 | 23 | 4 TGTAGAGCAGGGAGCAGGAAACT      | miRNA | miR-4732-5p |

|          |    |                                  |       |             |
|----------|----|----------------------------------|-------|-------------|
| t0032517 | 23 | 4 TGTAGAGCAGGGAGCAGGAAGCC        | miRNA | miR-4732-5p |
| t0032561 | 23 | 4 TGTAAGCAGGGAGCAGGAAGCT         | miRNA | miR-4732-5p |
| t0032731 | 23 | 4 TGAAGAGCAGGGAGCAGGAAGCT        | miRNA | miR-4732-5p |
| t0032735 | 18 | 4 TATATACACACACACACA             | miRNA | miR-467f    |
| t0032748 | 31 | 4 AAGGGCTGGGTTCGGTTCGGGCTGGGGCGC | miRNA | miR-4651    |
| t0032758 | 26 | 4 AGGGCTGGGTTCGGTTCGGGCTGGGGAG   | miRNA | miR-4651    |
| t0032764 | 22 | 4 GAAGGGTCGGGGCCGGCAGGGGC        | miRNA | miR-4516    |
| t0032781 | 27 | 4 GGGGAGAAGGGTTCGGGGCCGGCAGGGGC  | miRNA | miR-4516    |
| t0032784 | 21 | 4 TGAGGGAGTAGGTTGTGTGTT          | miRNA | miR-4510    |
| t0032847 | 22 | 4 TGAGGGAGTAGGTTGTGTGGTA         | miRNA | miR-4510    |
| t0032228 | 21 | 4 TGAGGGAGTAGGTTGTTTGGT          | miRNA | miR-4510    |
| t0031692 | 23 | 4 AAACCGTTACCATTACTGTGTTT        | miRNA | miR-451     |
| t0031944 | 19 | 4 AAGCCGTTACCATTACTGA            | miRNA | miR-451     |
| t0032080 | 20 | 4 AAACCGTTACGATTACTGAG           | miRNA | miR-451     |
| t0032713 | 21 | 4 AAACAGTTACCATAATGAGT           | miRNA | miR-451     |
| t0032949 | 21 | 4 CAACCGTTACCATTACTGAGT          | miRNA | miR-451     |
| t0031791 | 25 | 4 AAACCGTTATCATTACTGAGTTTAG      | miRNA | miR-451     |
| t0031978 | 21 | 4 AAACCTTTACCATTGCTGAGT          | miRNA | miR-451     |
| t0032016 | 23 | 4 AAACCGTTACCAATACTGAGTTT        | miRNA | miR-451     |
| t0032135 | 19 | 4 AAACCGTCACCATTACTGA            | miRNA | miR-451     |
| t0032838 | 20 | 4 AAAGCGTTACCATTACTGAG           | miRNA | miR-451     |
| t0031922 | 22 | 4 ACACCGTTACCATTACTGAGTT         | miRNA | miR-451     |
| t0032181 | 24 | 4 AAACCTTTACCATTACTGAGTTTA       | miRNA | miR-451     |
| t0032511 | 21 | 4 AAACCTTTACCATTACCGAGT          | miRNA | miR-451     |
| t0031814 | 25 | 4 AAACCGTTACCATTACTGAGCTTAG      | miRNA | miR-451     |
| t0031818 | 22 | 4 AAACCTTTAACATTACTGAGTT         | miRNA | miR-451     |
| t0031875 | 22 | 4 AAACATTTACCATTACTGAGTT         | miRNA | miR-451     |
| t0031879 | 22 | 4 AAACCGTTACCATAACTGAGTT         | miRNA | miR-451     |
| t0031908 | 23 | 4 AAACGGTTACCATTACTGAGTTT        | miRNA | miR-451     |
| t0031925 | 25 | 4 AAACCGTTACCATTACTGAGTTTTT      | miRNA | miR-451     |
| t0031926 | 20 | 4 ACACCGTTACCATTACTGAG           | miRNA | miR-451     |
| t0031937 | 19 | 4 AAACCGTTACCATTACTGC            | miRNA | miR-451     |
| t0031948 | 20 | 4 CAACCGTTACCATTACTGAG           | miRNA | miR-451     |
| t0031954 | 22 | 4 CAACCGTTACCATTACTGAGTT         | miRNA | miR-451     |
| t0031957 | 18 | 4 AACCGTTACCATTACTGA             | miRNA | miR-451     |
| t0032013 | 25 | 4 AAACCGTTGCCATTACTGAGTTTAG      | miRNA | miR-451     |
| t0032020 | 24 | 4 AAACCTTACCATTACTGAGTTTAG       | miRNA | miR-451     |
| t0032096 | 23 | 4 AAACCGTTACCATTCTGAGTTT         | miRNA | miR-451     |
| t0032099 | 24 | 4 AAACCGTTACCCTTACTGAGTTTA       | miRNA | miR-451     |
| t0032140 | 23 | 4 AAACCGTTACCATTACTGAGGAA        | miRNA | miR-451     |
| t0032178 | 20 | 4 GGGTGCGGGCCGGCGGGGGC           | miRNA | miR-4466    |
| t0032271 | 20 | 4 AATCCGAGTCACGGCACCAA           | miRNA | miR-4454    |
| t0032380 | 21 | 4 AAAAGCTGGGCTGAGAGGGCG          | miRNA | miR-4429    |
| t0032487 | 21 | 4 ACCAGCATTGTACAGGGCTAT          | miRNA | miR-4289    |
| t0032584 | 21 | 4 CAGCAGCAATTCATGTTTTGC          | miRNA | miR-424     |
| t0032587 | 19 | 4 CAGCAGCAGTTCATGTTTT            | miRNA | miR-424     |
| t0032603 | 22 | 4 TGAGGGGCTGAGAGCGAGACTT         | miRNA | miR-423-5p  |
| t0032663 | 21 | 4 TGAGGGGCAGAGGGCGGGACT          | miRNA | miR-423-5p  |
| t0032719 | 24 | 4 TGGGGGCAGAGAGCGAGACTTTT        | miRNA | miR-423-5p  |
| t0032825 | 24 | 4 TGAGGGACAGAGAGCGAGACTTTT       | miRNA | miR-423-5p  |
| t0032844 | 23 | 4 TGAGGGGCAGAGAGAGAGACTTG        | miRNA | miR-423-5p  |
| t0032909 | 24 | 4 TGAGGGGCAGAGAGAGAGACTTAA       | miRNA | miR-423-5p  |
| t0032919 | 22 | 4 TGAGGGGAAGAGAGCGAGAATT         | miRNA | miR-423-5p  |
| t0032959 | 23 | 4 TAAGGGGCAGAGAGCGAGACTTA        | miRNA | miR-423-5p  |
| t0032162 | 23 | 4 TGAGGGGCAGAGGGCGAGACTTT        | miRNA | miR-423-5p  |
| t0032669 | 24 | 4 TGAGGAGCAGAGAGCGAGACTTTT       | miRNA | miR-423-5p  |
| t0032242 | 24 | 4 TGAGGGGCAGAGAGCGAGCCTTTA       | miRNA | miR-423-5p  |
| t0032031 | 19 | 4 TGAGGGGCAGAGAGCAAGA            | miRNA | miR-423-5p  |

|          |    |                                |       |             |
|----------|----|--------------------------------|-------|-------------|
| t0032563 | 22 | 4 TGAGGGGAAGAGAGAGACTT         | miRNA | miR-423-5p  |
| t0031681 | 20 | 4 TGAGGGGCAGAGAACGAGAC         | miRNA | miR-423-5p  |
| t0031695 | 23 | 4 TCGGGGCAGAGAGCGAGACTTA       | miRNA | miR-423-5p  |
| t0031714 | 23 | 4 TGAGGGGCAGATAGCGAGAATTT      | miRNA | miR-423-5p  |
| t0031828 | 23 | 4 TGAGGGGCAGAGAGCGAGACTCA      | miRNA | miR-423-5p  |
| t0032011 | 24 | 4 TGAGGGGCAGAGAGCTAGACTTTT     | miRNA | miR-423-5p  |
| t0032297 | 20 | 4 TGAGGGGCAGAGAGCGAGGC         | miRNA | miR-423-5p  |
| t0032335 | 27 | 4 ACCCGGGGGCCGGCGGCGGCGGAC     | miRNA | miR-3885-5p |
| t0032347 | 25 | 4 GGGCCGGCGGCGGCGGCGACTCTGG    | miRNA | miR-3885-5p |
| t0032397 | 20 | 4 CGGCGGCGGGGTGTGGGGT          | miRNA | miR-3885-5p |
| t0032470 | 19 | 4 TGGGGCGGCGGCGGGGGG           | miRNA | miR-3885-5p |
| t0032539 | 26 | 4 GTCGGGGCGGCGGCGGCGGTGGCATC   | miRNA | miR-3885-5p |
| t0032647 | 26 | 4 GGGGCCGGCGGCGGCGGCGACTCTGG   | miRNA | miR-3885-5p |
| t0032677 | 20 | 4 GCGGCGGCGGCGGGGTGTA          | miRNA | miR-3885-5p |
| t0032801 | 26 | 4 GCGGCGGCGGCGACTCTGGACGCGA    | miRNA | miR-3885-5p |
| t0032826 | 27 | 4 GCGGCGGCGGCGACTCTGGACGCGAG   | miRNA | miR-3885-5p |
| t0032890 | 21 | 4 GCGGCGTCCGGCGGCGGGG          | miRNA | miR-3885-5p |
| t0032913 | 22 | 4 CTGGACTIONGGAGGCAGAAGGCA     | miRNA | miR-378f    |
| t0032934 | 25 | 4 ACTGGACTIONGGAGTAAGAAGGCATC  | miRNA | miR-378     |
| t0032968 | 23 | 4 ACTGGACTIONGGAGTAAGAAGGCA    | miRNA | miR-378     |
| t0031840 | 24 | 4 ACTGGACTIONGGAGTCAGAAGGCGT   | miRNA | miR-378     |
| t0031956 | 21 | 4 ACTGGACTIONGGAGTCAGCAGG      | miRNA | miR-378     |
| t0032070 | 22 | 4 ATATAATACAACCCGCTAAGTG       | miRNA | miR-374     |
| t0032303 | 22 | 4 AATTGCACGGGATCCATCTGTA       | miRNA | miR-363     |
| t0032382 | 21 | 4 AAAAAAAAAAAGCCCAACCCT        | miRNA | miR-3613-3p |
| t0032404 | 23 | 4 TGAAGACTGAAGCGGAGAAGGGT      | miRNA | miR-3526    |
| t0032632 | 29 | 4 AACTTTGAAGACTGAAGTGGCGAAGGGT | miRNA | miR-3526    |
| t0032769 | 23 | 4 TGAAGACTGAAGGGGAGAAGGGG      | miRNA | miR-3526    |
| t0032967 | 28 | 4 AACTTTGAAGACTGAAGTGGAGGAGGGT | miRNA | miR-3526    |
| t0032985 | 28 | 4 AACTTTGAAGACTGAAGAGGAGAAGGGT | miRNA | miR-3526    |
| t0032943 | 28 | 4 AACTTTGAAGACTGAAGCGGAGAAGGGT | miRNA | miR-3526    |
| t0032023 | 23 | 4 TGAAGACTGAAGTGGAGAAGGGC      | miRNA | miR-3526    |
| t0032398 | 22 | 4 GAAGACTGAAGTGGAGAAGGGA       | miRNA | miR-3526    |
| t0032412 | 27 | 4 AACTTTGAAGACTGAAGCGGAGAAGGG  | miRNA | miR-3526    |
| t0032886 | 28 | 4 AACTTTGAAGACTGAGGTGGAGAAGGGT | miRNA | miR-3526    |
| t0032529 | 20 | 4 AGAAGATTGCCGCTCGTTCT         | miRNA | miR-3494    |
| t0032087 | 20 | 4 CCCTCGAACTGTTGTGGCCA         | miRNA | miR-3487    |
| t0032734 | 20 | 4 TCCTCGAACTGTTGTGGCCA         | miRNA | miR-3487    |
| t0031696 | 23 | 4 CCTCACACAGAAATCGCACCCGT      | miRNA | miR-342-3p  |
| t0031701 | 25 | 4 TCTCACACAGAAATCGCACCCGGCT    | miRNA | miR-342-3p  |
| t0031715 | 23 | 4 TCTCACGCAGAAATCGCACCCGT      | miRNA | miR-342-3p  |
| t0031769 | 22 | 4 TCTCACCCAGAAATCGCACCCG       | miRNA | miR-342-3p  |
| t0032367 | 23 | 4 TCTCACCCAGAAATCGCACCCGT      | miRNA | miR-342-3p  |
| t0032448 | 22 | 4 TCTCACACAGAAATCGCACACG       | miRNA | miR-342-3p  |
| t0032727 | 23 | 4 AAAAGCTGGGATGAGAGGGCGTT      | miRNA | miR-320d    |
| t0032828 | 23 | 4 AAAAGCTGGGTTGAAAGGGCGTT      | miRNA | miR-320d    |
| t0032862 | 23 | 4 AAAAGCTGGGTTGAGAGGGTGAG      | miRNA | miR-320d    |
| t0032961 | 22 | 4 AAAAGCTGGGTTGAGAGGTCGA       | miRNA | miR-320d    |
| t0032435 | 23 | 4 AAAAGCTGGGTTGCGAGGGCGTA      | miRNA | miR-320d    |
| t0031903 | 23 | 4 AAAAGCTCGGTTGAGAGGGCGTA      | miRNA | miR-320d    |
| t0032400 | 23 | 4 AAAGGCTGGGTTGAGAGGGCGTT      | miRNA | miR-320d    |
| t0031759 | 22 | 4 AACAGCTGGGTTGAGAGGGCGT       | miRNA | miR-320d    |
| t0031999 | 23 | 4 AAAAGCTGGGTTGAGAGGCCGAA      | miRNA | miR-320d    |
| t0032026 | 22 | 4 AAAAGCTGGGTTGACAGGGCGT       | miRNA | miR-320d    |
| t0032515 | 23 | 4 AAACGCTGGGTTGAGAGGGCGTA      | miRNA | miR-320d    |
| t0032599 | 23 | 4 GAAAGCTGGGTTGAGAGGGCGTT      | miRNA | miR-320d    |
| t0032633 | 23 | 4 AACAGCTGGGTTGAGAGGGCGTA      | miRNA | miR-320d    |
| t0031705 | 22 | 4 AAAAGCTGGGATGAGAGGGCAA       | miRNA | miR-320b    |

|          |    |                              |       |              |
|----------|----|------------------------------|-------|--------------|
| t0031781 | 23 | 4 ACAAGCTGGGTTGAGAGGGCGAA    | miRNA | miR-320a     |
| t0031807 | 21 | 4 AAAAGCTGGGTTGAGAGGGCG      | miRNA | miR-320a     |
| t0031904 | 22 | 4 AAAAGCGGGGTTGAGAGGGCGA     | miRNA | miR-320a     |
| t0031968 | 23 | 4 AAAAGCTGAGTTGAGAGGGCGAT    | miRNA | miR-320a     |
| t0032014 | 23 | 4 AAAAGCTGGGTTGGGAGGGCGAT    | miRNA | miR-320a     |
| t0032154 | 21 | 4 AAAAGCTGGATTGAGAGGGCG      | miRNA | miR-320a     |
| t0032204 | 23 | 4 ACAAGCTGGGTTGAGAGGGCGAT    | miRNA | miR-320a     |
| t0032214 | 22 | 4 AAAAGCAGGGTTGAGAGGGCGA     | miRNA | miR-320a     |
| t0032283 | 21 | 4 AAAAGATGGGTTGAGAGGGCG      | miRNA | miR-320a     |
| t0032494 | 21 | 4 GAAAGCTGGGTTGAGAGGGCG      | miRNA | miR-320a     |
| t0032842 | 23 | 4 AACAGCTGGGTTGAGAGGGCGAA    | miRNA | miR-320a     |
| t0032920 | 23 | 4 AATCTGAGAAGGCGCACAAGGCT    | miRNA | miR-3200-5p  |
| t0031960 | 22 | 4 TCTGGGAGGTTGTAGCAGGGGA     | miRNA | miR-3192     |
| t0031699 | 21 | 4 GTGGAAGGTAGACGGCCCGAG      | miRNA | miR-3190     |
| t0031911 | 24 | 4 GGCTGGTCTGAGTGCAGTGGTGTT   | miRNA | miR-3135b    |
| t0031918 | 21 | 4 TATTGCACTTATCCCGGCCTG      | miRNA | miR-311a     |
| t0031979 | 24 | 4 TGTAACATCCCCGACTGGAAGGT    | miRNA | miR-30d      |
| t0032000 | 21 | 4 TGTAACATCCTACAATCTCA       | miRNA | miR-30c      |
| t0032176 | 24 | 4 TTCACAGTGGCTAAGTTCTGCCTC   | miRNA | miR-27a-3p   |
| t0032282 | 20 | 4 GCGGATGTAGACAAGTGGA        | miRNA | miR-270      |
| t0032289 | 21 | 4 TTCAAGTAATTCAGGATAGGA      | miRNA | miR-26b      |
| t0032536 | 21 | 4 TTCAAGTAATTCGGGATAGGT      | miRNA | miR-26b      |
| t0032751 | 22 | 4 TTCGAGTAATTCAGGATAGGTT     | miRNA | miR-26b      |
| t0033001 | 22 | 4 TTCAAGTAATTCAGGATAGGAT     | miRNA | miR-26b      |
| t0032543 | 22 | 4 TTCAAGTAATTCAGGTTAGGTT     | miRNA | miR-26b      |
| t0032499 | 22 | 4 TCCAAGTAATCCAGGATAGGCT     | miRNA | miR-26a      |
| t0032730 | 22 | 4 TTCAAGTGATCCAGGATAGGCT     | miRNA | miR-26a      |
| t0032766 | 24 | 4 TTCAAGTAATCCAGGATAGGCTGA   | miRNA | miR-26a      |
| t0032768 | 22 | 4 TTCAAGTAATCCAGGACAGGCT     | miRNA | miR-26a      |
| t0032670 | 22 | 4 TTCAAGCAATCCAGGATAGGCT     | miRNA | miR-26a      |
| t0031703 | 21 | 4 AGGCGGAGACTTGGGCACTTG      | miRNA | miR-25*      |
| t0031698 | 22 | 4 CTTTGCCTTGTCTCGGTCTGA      | miRNA | miR-25       |
| t0032137 | 21 | 4 CATTGCACTTGGCTCGGTCTG      | miRNA | miR-25       |
| t0031736 | 21 | 4 CATTGCACTTGA CT CGGTCTG    | miRNA | miR-25       |
| t0032509 | 22 | 4 CATTGCACTTGTCTCGGTGTGA     | miRNA | miR-25       |
| t0032777 | 21 | 4 CATTGCACTTGTGT CGGTCTG     | miRNA | miR-25       |
| t0032879 | 26 | 4 TGGCTCAGTTCAGCAGGAACAGGATC | miRNA | miR-24b      |
| t0032923 | 21 | 4 TGGCTCAGTTCAGCAGGAACC      | miRNA | miR-24b      |
| t0032139 | 23 | 4 TGACTCAGTTCAGCAGGAACAGT    | miRNA | miR-24       |
| t0032229 | 24 | 4 TGGCTCAGTTCAGCAGGCACAGTT   | miRNA | miR-24       |
| t0032253 | 19 | 4 ATCAAATTGCCAGGGATTT        | miRNA | miR-23a      |
| t0032795 | 22 | 4 TCACATTGCCAGGGATTTCAA      | miRNA | miR-23a      |
| t0032891 | 19 | 4 ATCACATTGCCAGGGGTTT        | miRNA | miR-23a      |
| t0031946 | 20 | 4 ATCACATTGCCAGGGCTTTC       | miRNA | miR-23a      |
| t0031817 | 21 | 4 AAGCTGCCAGTTGAAGA ACTT     | miRNA | miR-22-3p    |
| t0032293 | 22 | 4 TGACTGGGGCGGAACATCTGTT     | miRNA | miR-219-2-3p |
| t0032518 | 22 | 4 AGTGAGATTGTTGCATATTTTT     | miRNA | miR-2162-5p  |
| t0032628 | 22 | 4 TTGGGGA AACGGCCGCTGGGTG    | miRNA | miR-2110     |
| t0032658 | 21 | 4 TAGCTTATCAGACTGATGTTT      | miRNA | miR-21       |
| t0032210 | 21 | 4 TAGATTATCAGACTGATGTTG      | miRNA | miR-21       |
| t0032313 | 22 | 4 TAGCAGCACATAAATATTGGCA     | miRNA | miR-195      |
| t0032124 | 19 | 4 TAGCAGCACATAAATATTG        | miRNA | miR-195      |
| t0032712 | 23 | 4 TGACCTATGAATTGAAAGCCAGA    | miRNA | miR-192      |
| t0032169 | 21 | 4 CTGACCTATAAATTGACAGCC      | miRNA | miR-192      |
| t0032473 | 20 | 4 TGACCTATGAATTGACAGAC       | miRNA | miR-192      |
| t0032594 | 21 | 4 CTGACCTATGAATTAACAGCC      | miRNA | miR-192      |
| t0032624 | 21 | 4 CCGACCTATGAATTGACAGCC      | miRNA | miR-192      |
| t0032262 | 22 | 4 AACGGAATCCCAAAGCAACTG      | miRNA | miR-191      |

|          |    |                                |       |             |
|----------|----|--------------------------------|-------|-------------|
| t0031802 | 22 | 4 AACGGAATACCAAAAAGCAGCTG      | miRNA | miR-191     |
| t0032078 | 22 | 4 CAACGGAATCCCAAAAAGGAGCT      | miRNA | miR-191     |
| t0032196 | 19 | 4 AACGGAATCCCAAAAAGCCG         | miRNA | miR-191     |
| t0032445 | 21 | 4 CAACGGAATCCCAGAAGCAGC        | miRNA | miR-191     |
| t0032582 | 21 | 4 CAACGGAATCCCAAAAAGCAGC       | miRNA | miR-191     |
| t0032792 | 22 | 4 CAACGGAATCCCACAAGCAGCT       | miRNA | miR-191     |
| t0032820 | 23 | 4 CAACGGAATCCCAAAAAGCACCTG     | miRNA | miR-191     |
| t0031680 | 23 | 4 CAACGGACTCCCAAAAAGCAGCTG     | miRNA | miR-191     |
| t0032247 | 20 | 4 CAACGGAATACCAAAAAGCAG        | miRNA | miR-191     |
| t0032486 | 24 | 4 CAACGGAATCCCAAAAAGCACCTGA    | miRNA | miR-191     |
| t0032595 | 24 | 4 CAACGGAATACCAAAAAGCAGCTGA    | miRNA | miR-191     |
| t0032753 | 22 | 4 AACGGGATCCCAAAAAGCAGCTG      | miRNA | miR-191     |
| t0031672 | 23 | 4 CAACGGAATCCCACAAGCAGCTG      | miRNA | miR-191     |
| t0031876 | 23 | 4 AAAGGAATCCCAAAAAGCAGCTGA     | miRNA | miR-191     |
| t0031933 | 22 | 4 CAACGGACTCCCAAAAAGCAGCT      | miRNA | miR-191     |
| t0031959 | 24 | 4 TGGAGAGAAAGGCAGTTCCTGACG     | miRNA | miR-185     |
| t0032056 | 22 | 4 TGAGAGAAAGGCAGTTCCTGAA       | miRNA | miR-185     |
| t0032180 | 23 | 4 TGGAGAGAAAGGCTGTTCCCTGAT     | miRNA | miR-185     |
| t0032207 | 23 | 4 TGGGGAGAAAGGCAGTTCCTGAG      | miRNA | miR-185     |
| t0032266 | 23 | 4 TGGAGAGATAGGCAGTTCCTGAA      | miRNA | miR-185     |
| t0032286 | 23 | 4 AGGAGAGAAAGGCAGTTCCTGAT      | miRNA | miR-185     |
| t0032334 | 23 | 4 TGGAGAGAAAGGCAGATCCTGAG      | miRNA | miR-185     |
| t0032374 | 20 | 4 TGGAGAGAAAGGGAGTTCCT         | miRNA | miR-185     |
| t0032379 | 23 | 4 TGGAGAGAAAGGCAGTTCCTGAG      | miRNA | miR-185     |
| t0032477 | 22 | 4 TGGAGGGAAAGGAAGTTCCTGA       | miRNA | miR-185     |
| t0032565 | 23 | 4 TGGAGAGAAAGGCAGTTCCTAAG      | miRNA | miR-185     |
| t0032580 | 23 | 4 TGGAGAGAAAGGCAGTCCCTGAG      | miRNA | miR-185     |
| t0032689 | 23 | 4 TGGAGAGAAAGACAGTTCCTGAG      | miRNA | miR-185     |
| t0031685 | 20 | 4 TGGAGAGAAAGGCAGTTGCT         | miRNA | miR-185     |
| t0031730 | 20 | 4 TGAGAGAAAGGCAGTTCCTG         | miRNA | miR-185     |
| t0031994 | 28 | 4 TGGAGAGAAAGGCAGTTCCTGAAAAAAA | miRNA | miR-185     |
| t0032034 | 23 | 4 TGGAAAGAAAGGCAGTTCCTGAT      | miRNA | miR-185     |
| t0032063 | 23 | 4 TGGAGAGAATGGCAGTTCCTGAT      | miRNA | miR-185     |
| t0032125 | 23 | 4 TGGAGAGAAAGGCAGTTCATGAG      | miRNA | miR-185     |
| t0032292 | 22 | 4 TGGAGAGAAAGGCAGTTCCTTT       | miRNA | miR-185     |
| t0032390 | 23 | 4 AGACCTACTTATCTACCAACAGA      | miRNA | miR-1839-3p |
| t0032410 | 22 | 4 AGGGAGATAGAACAGGTCTTGA       | miRNA | miR-1839    |
| t0032438 | 20 | 4 AAGGGAGATAGAACAGGTCT         | miRNA | miR-1839    |
| t0032450 | 22 | 4 AAGGTAGATAGAACAGGCCTTG       | miRNA | miR-1839    |
| t0032454 | 21 | 4 AGGTAGATGGAACAGGTCTTG        | miRNA | miR-1839    |
| t0032462 | 22 | 4 TGAGGGAGCAGATTGTATAGTT       | miRNA | miR-1827    |
| t0032607 | 22 | 4 TGAGGGAGTAGATTGTTAGTT        | miRNA | miR-1827    |
| t0032615 | 20 | 4 TGAGGGAGTAGATTATAGTT         | miRNA | miR-1827    |
| t0032660 | 22 | 4 TGAGGGAATAGATTGTATAGTT       | miRNA | miR-1827    |
| t0032721 | 21 | 4 TGAGGGAGTAGATTGTATAGA        | miRNA | miR-1827    |
| t0032785 | 22 | 4 TGAGGAAGTAGATTGTATAGGT       | miRNA | miR-1827    |
| t0032894 | 20 | 4 TGAGGGAGTAGATTGAATAG         | miRNA | miR-1827    |
| t0032928 | 22 | 4 TGAGGGAGTAGATTGTATAGGT       | miRNA | miR-1827    |
| t0032046 | 20 | 4 TGAGGGAGTAGATTGTTAG          | miRNA | miR-1827    |
| t0032197 | 22 | 4 TGAGGGAGGAGGTTGTATAGTT       | miRNA | miR-1827    |
| t0032321 | 20 | 4 GAGGGAGTAGGTTGTATAGT         | miRNA | miR-1827    |
| t0032350 | 23 | 4 CAAAGTGCTTACAGTGCAGGTCCG     | miRNA | miR-17a     |
| t0032501 | 20 | 4 TCGGGGCGTCGGCGGCGGCG         | miRNA | miR-1777a   |
| t0031734 | 19 | 4 TCGGGGCGGCGGCGGCGGT          | miRNA | miR-1777a   |
| t0031888 | 22 | 4 CAAAGTGCTTACAGTGCCGGTA       | miRNA | miR-17      |
| t0031955 | 23 | 4 CAAAGTGCTTACAGTGCCGGTAG      | miRNA | miR-17      |
| t0032018 | 22 | 4 AGCACGTAAATATTGGCTAGCA       | miRNA | miR-16b     |
| t0032199 | 25 | 4 GGAAGCGGCGATGGCGGGGCTGAAA    | miRNA | miR-1636    |

|          |    |                                 |       |             |
|----------|----|---------------------------------|-------|-------------|
| t0032326 | 22 | 4 TAGTAGCACGTAATATTGGAG         | miRNA | miR-16      |
| t0032610 | 23 | 4 TAGCAGCACGTAATATCGGCGA        | miRNA | miR-16      |
| t0032671 | 22 | 4 TAGCAGAATGTAATATTGGCG         | miRNA | miR-16      |
| t0032704 | 19 | 4 TAGCAGCAAGTAAATATTG           | miRNA | miR-16      |
| t0032715 | 23 | 4 TAGCAGCACGTAATATTAGCGT        | miRNA | miR-16      |
| t0032864 | 20 | 4 TAGCAGCACGTAATATGGG           | miRNA | miR-16      |
| t0032597 | 23 | 4 TAACAGCACGTAATATTGGCGA        | miRNA | miR-16      |
| t0032198 | 22 | 4 TAGAAGCACGTAATATTGCCG         | miRNA | miR-16      |
| t0032343 | 23 | 4 TAGCAGCACGGAAATATTGGCGA       | miRNA | miR-16      |
| t0031787 | 23 | 4 TAGCAGCGCGTAATATTGGCGA        | miRNA | miR-16      |
| t0032375 | 23 | 4 CAGCAGCACGTAATATTGGCGT        | miRNA | miR-16      |
| t0032040 | 20 | 4 TAGCAGCACGTAATAATGG           | miRNA | miR-16      |
| t0032814 | 21 | 4 AGCAGCACGTAATATTGGAG          | miRNA | miR-16      |
| t0031707 | 21 | 4 AGAAGCACGTAATATTGGCG          | miRNA | miR-16      |
| t0031725 | 20 | 4 AGCAGCACGTAATATTGGC           | miRNA | miR-16      |
| t0031741 | 19 | 4 TAGCGGCACGTAATATTG            | miRNA | miR-16      |
| t0031804 | 23 | 4 CAGCAGCACGTAATATTGGCGA        | miRNA | miR-16      |
| t0031893 | 22 | 4 TAGCAGAACGTAATATTAGCG         | miRNA | miR-16      |
| t0031967 | 20 | 4 TAGCAGCACGTAATGTTGG           | miRNA | miR-16      |
| t0032072 | 22 | 4 TAGTAGTACGTAATATTGGCG         | miRNA | miR-16      |
| t0032182 | 20 | 4 TAGCAGCACGTAATATAGG           | miRNA | miR-16      |
| t0032290 | 20 | 4 TAGCAGCAAATCATGGTTTT          | miRNA | miR-15c     |
| t0032291 | 19 | 4 TAGCAGCACTTCATGGTTT           | miRNA | miR-15b     |
| t0032336 | 19 | 4 TAGCAGAAGATCATGGTTT           | miRNA | miR-15b     |
| t0032346 | 20 | 4 TCGCAGCACATCATGGTTTA          | miRNA | miR-15b     |
| t0032411 | 19 | 4 TAGCAGAAAATCATGGTTT           | miRNA | miR-15b     |
| t0032440 | 22 | 4 TAGGAGCACATCATGGTTTACA        | miRNA | miR-15b     |
| t0032496 | 18 | 4 TAGCAGCACATCCTGGTT            | miRNA | miR-15b     |
| t0032508 | 20 | 4 GCAGCACATCATGGTTTATA          | miRNA | miR-15b     |
| t0032570 | 19 | 4 TAGCAGCAACATGGTTT             | miRNA | miR-15b     |
| t0032691 | 22 | 4 TCGCAGCACATCATGGTTTACA        | miRNA | miR-15b     |
| t0032714 | 22 | 4 TAGCCGCACATCATGGTTTACA        | miRNA | miR-15b     |
| t0032833 | 20 | 4 TAGCAGCACAGCATGGTTTA          | miRNA | miR-15b     |
| t0032892 | 25 | 4 TAGCAGCACATCATGGTTTAAAAAA     | miRNA | miR-15b     |
| t0032062 | 21 | 4 TAGCAGCACGTCATGGTTTAC         | miRNA | miR-15b     |
| t0031810 | 22 | 4 TAGCAGCACATCAAGTTTACA         | miRNA | miR-15b     |
| t0031907 | 19 | 4 TAGCAGCACATCATGGTTC           | miRNA | miR-15b     |
| t0031919 | 19 | 4 TAGCTGCACATCATGGTTT           | miRNA | miR-15b     |
| t0031950 | 21 | 4 TAGCAGCACTTAATGGTTTGT         | miRNA | miR-15a     |
| t0032029 | 20 | 4 TAGCAGCACATTATGGTTTG          | miRNA | miR-15a     |
| t0032126 | 21 | 4 TAGCAGCACATAAAGTTTGT          | miRNA | miR-15a     |
| t0032328 | 21 | 4 TAGCATCACATAATGGTTTGT         | miRNA | miR-15a     |
| t0032363 | 19 | 4 TAGCGGCACATAATGGTTT           | miRNA | miR-15a     |
| t0032433 | 35 | 4 TCTCCCAACCCTTGACCAGTGTTTTTGTT | miRNA | miR-150     |
| t0032436 | 25 | 4 TCAGTGCATGACAGAACTTGGTATC     | miRNA | miR-148b-3p |
| t0032528 | 19 | 4 TCAGTGCACACTACAGAACTG         | miRNA | miR-148a    |
| t0032530 | 23 | 4 GGATATCATCATATACTGTACGT       | miRNA | miR-144*    |
| t0032641 | 22 | 4 GGATATCATCATATACTGTACG        | miRNA | miR-144*    |
| t0032683 | 21 | 4 TACAGTATAGATGATGTAATT         | miRNA | miR-144     |
| t0032722 | 20 | 4 TACAGTATAGATGATGGACT          | miRNA | miR-144     |
| t0032867 | 23 | 4 TGAGATGAAGCACTGCAGCTATC       | miRNA | miR-143     |
| t0031762 | 20 | 4 CCCATAAAATAGAAAGCACT          | miRNA | miR-142     |
| t0032164 | 20 | 4 CCCATAAAGCAGAAAGCACT          | miRNA | miR-142     |
| t0032222 | 24 | 4 TACCACAGGGTAGAACCACGGGCG      | miRNA | miR-140     |
| t0032513 | 20 | 4 CACAGGGTAGAACCACGGAT          | miRNA | miR-140     |
| t0032591 | 23 | 4 TACCACAGGGTACAACCACGGAA       | miRNA | miR-140     |
| t0032048 | 23 | 4 TACCACAGCGTAGAACCACGGAA       | miRNA | miR-140     |
| t0032333 | 25 | 4 TACCACAGGGTAGAACCCCGGACAA     | miRNA | miR-140     |



|          |    |                              |       |          |
|----------|----|------------------------------|-------|----------|
| t0032969 | 23 | 4 TACCACAGGATAGAACCACGGAT    | miRNA | miR-140  |
| t0032134 | 23 | 4 TACCACCGGGTAGAACCACGGAT    | miRNA | miR-140  |
| t0032274 | 24 | 4 ACCACAGGGTAGAACCACGGCCAA   | miRNA | miR-140  |
| t0031775 | 23 | 4 TACCACAGGGTAGAACGACGGAT    | miRNA | miR-140  |
| t0031887 | 23 | 4 ACCACAGGGTAGAACCAAGGAAA    | miRNA | miR-140  |
| t0032889 | 24 | 4 TACCACAGGGTAGAACCAACGGAAA  | miRNA | miR-140  |
| t0032702 | 23 | 4 ACCACAGGGAAGAACCACGGAAAG   | miRNA | miR-140  |
| t0032873 | 24 | 4 TACCACAGGGTAGAACGACGGACA   | miRNA | miR-140  |
| t0031675 | 21 | 4 ACAACAGGGTAGAACCAACGGA     | miRNA | miR-140  |
| t0031689 | 23 | 4 ACCACAGGGGAGAACCACGGACG    | miRNA | miR-140  |
| t0031723 | 23 | 4 TACCACGGGGTAGAACCACGGAT    | miRNA | miR-140  |
| t0031752 | 22 | 4 ACCACAGGATAGAACCACGGAA     | miRNA | miR-140  |
| t0031780 | 24 | 4 TACCACAAGGTAGAACCACGGACG   | miRNA | miR-140  |
| t0031794 | 23 | 4 TACCACAGGGTCGAACCACGGAA    | miRNA | miR-140  |
| t0031822 | 23 | 4 TACCACAGGGTAGAACCACGCAC    | miRNA | miR-140  |
| t0031877 | 22 | 4 ACGACAGGGTAGAACCACGGAC     | miRNA | miR-140  |
| t0031890 | 24 | 4 TACCACAGGGTAGAACCACGTACA   | miRNA | miR-140  |
| t0031931 | 21 | 4 ACCACAGGGTAGAACCAAGGA      | miRNA | miR-140  |
| t0031958 | 23 | 4 ACCACAGGGTAGAACCAACGGGCG   | miRNA | miR-140  |
| t0031984 | 21 | 4 ACCACAGGGTAGAACCCCGGC      | miRNA | miR-140  |
| t0032032 | 22 | 4 TACACAGGGTAGAACCAACGGAT    | miRNA | miR-140  |
| t0032036 | 23 | 4 ACCACAGGGTAAAACCACGGACA    | miRNA | miR-140  |
| t0032149 | 23 | 4 ACCACAGGGTAGAACCGCGGACA    | miRNA | miR-140  |
| t0032175 | 21 | 4 ACCACAGTGTAGAACAACGGA      | miRNA | miR-140  |
| t0032177 | 23 | 4 TACAACAGGGTAGAACCAAGGAA    | miRNA | miR-140  |
| t0032188 | 23 | 4 TACCACAGGGTAGAACCTCGGAA    | miRNA | miR-140  |
| t0032189 | 21 | 4 TACCACGGGGTAGAACCAACGG     | miRNA | miR-140  |
| t0032203 | 22 | 4 ACCAAAGGGTAGAACCAACGGAT    | miRNA | miR-140  |
| t0032245 | 22 | 4 ACCACAGGGTAGAATCACGGTA     | miRNA | miR-140  |
| t0032254 | 23 | 4 TACCACAGGGTAGAACCAAGGGAT   | miRNA | miR-140  |
| t0032358 | 22 | 4 ACCACCGGGTAGAACCAACGGAC    | miRNA | miR-140  |
| t0032401 | 23 | 4 TACCACAGGCTAGAACCACGGAT    | miRNA | miR-140  |
| t0032458 | 23 | 4 TACCACAGGGTAGTACCACGGAA    | miRNA | miR-140  |
| t0032503 | 22 | 4 CCACAGGGTAGAACCAACGGACC    | miRNA | miR-140  |
| t0032546 | 23 | 4 ACCACAGGGTAGAACCAACGGCTA   | miRNA | miR-140  |
| t0032602 | 22 | 4 ACCACAGGGTAGAATCCCGGAC     | miRNA | miR-140  |
| t0032644 | 23 | 4 ACCACAAGGTAGAACCACGGACA    | miRNA | miR-140  |
| t0032648 | 22 | 4 ACCACAGGGTAGAACCAAGGGAC    | miRNA | miR-140  |
| t0032653 | 20 | 4 CCACAGGGTAGAACCAACGGA      | miRNA | miR-140  |
| t0032716 | 23 | 4 GACCACAGGGTAGAACCAACGGAA   | miRNA | miR-140  |
| t0032733 | 26 | 4 TGGAATGTAAAGAAGTATGTATTATC | miRNA | miR-1-3p |
| t0032762 | 22 | 4 CAGTGCAATGATGAAAGGGAAT     | miRNA | miR-130b |
| t0032811 | 21 | 4 CAGTGCAATGTTAAAAGGGCC      | miRNA | miR-130a |
| t0032815 | 21 | 4 GTGAGGACTCGGGAGGTGGAT      | miRNA | miR-1224 |
| t0032832 | 23 | 4 AGCAGCATTGTACAGGGCTTTGA    | miRNA | miR-107b |
| t0032869 | 23 | 4 AGCAGCATTGTACAGGGCTATCA    | miRNA | miR-107  |
| t0032882 | 22 | 4 AGCAGCATTGGACAGGGCTATT     | miRNA | miR-107  |
| t0032901 | 20 | 4 TAAAGTGCTGACAGCGCAGA       | miRNA | miR-106b |
| t0032904 | 21 | 4 TAAAGTGCTAACAGTGCAGAT      | miRNA | miR-106b |
| t0032905 | 20 | 4 CAAAGTGCTGACAGTGCAGA       | miRNA | miR-106b |
| t0032946 | 21 | 4 TAAAGTGCTGACAGTGAAGAT      | miRNA | miR-106b |
| t0032971 | 20 | 4 TAAAGTGCTAACAGTGCAGA       | miRNA | miR-106b |
| t0032986 | 21 | 4 TAAAGTGCTGACAGTGCCGAA      | miRNA | miR-106b |
| t0032541 | 21 | 4 TAAAGTCTGACAGTGCAGAT       | miRNA | miR-106b |
| t0031713 | 22 | 4 TAAAGTGCTGACAGGGCAGATA     | miRNA | miR-106b |
| t0032492 | 21 | 4 TAAAGTGCTGACAGTGCAGAT      | miRNA | miR-106b |
| t0032491 | 21 | 4 AAAAGTGCTTACAGGGCAGGT      | miRNA | miR-106  |
| t0032146 | 23 | 4 AAAAGTGCTTACAGTGCAGGGAG    | miRNA | miR-106  |

|          |    |                                 |       |          |
|----------|----|---------------------------------|-------|----------|
| t0031800 | 23 | 4 AAAAGTGCTTACAGTGCAGGAAG       | miRNA | miR-106  |
| t0032574 | 22 | 4 AGCAGCATTGTACAGGGCGATG        | miRNA | miR-103a |
| t0031743 | 21 | 4 AGCAGCTTTGTACAGGGCTAT         | miRNA | miR-103a |
| t0032019 | 22 | 4 TGCAGCATTGTACAGGGCTATG        | miRNA | miR-103a |
| t0032065 | 20 | 4 AGCACCATTGTACAGGGCTA          | miRNA | miR-103a |
| t0032073 | 22 | 4 ATCAGCATTGTACAGGGCTATG        | miRNA | miR-103a |
| t0032206 | 23 | 4 AGTAGCATTGTACAGGGCTATGT       | miRNA | miR-103a |
| t0032723 | 22 | 4 AGCAGCATTGTACAGGCCTATG        | miRNA | miR-103a |
| t0032724 | 22 | 4 AGCAGCAATGTACAGGGCTATG        | miRNA | miR-103a |
| t0032798 | 22 | 4 AGCATCATTGTACAGGGCTATG        | miRNA | miR-103a |
| t0032870 | 24 | 4 AGAAGCATTGTACAGGGCTATGAT      | miRNA | miR-103a |
| t0032395 | 23 | 4 GTACAGTACTGTGATAACTGACA       | miRNA | miR-101c |
| t0032657 | 20 | 4 AACAGTACTGTGATAACTGA          | miRNA | miR-101c |
| t0032665 | 22 | 4 TACAGTACTATGATAACTGAAG        | miRNA | miR-101b |
| t0032003 | 22 | 4 TGCAGTACTGTGATAACTGAAG        | miRNA | miR-101  |
| t0032144 | 22 | 4 GTACAGTACAGTGATAACTGAA        | miRNA | miR-101  |
| t0032276 | 21 | 4 GTACAGTACTGTGATCACTGA         | miRNA | miR-101  |
| t0032279 | 21 | 4 GTACAGTGCTGTGATAACTGA         | miRNA | miR-101  |
| t0032466 | 20 | 4 TACAGTCCTGTGATAACTGA          | miRNA | miR-101  |
| t0032484 | 22 | 4 TACAGTACTGTGATAAATGAAA        | miRNA | miR-101  |
| t0032485 | 22 | 4 TAGAGTACTGTGATAACTGAAG        | miRNA | miR-101  |
| t0032523 | 22 | 4 TACAGTACTGGGATAACTGAAG        | miRNA | miR-101  |
| t0032524 | 29 | 4 TACAGTACTGTGATAACTGAAGCGTGCGT | miRNA | miR-101  |
| t0032533 | 21 | 4 TACAGTACTGTTATAACTGAA         | miRNA | miR-101  |
| t0032195 | 22 | 4 TACAGCACTGTGATAACTGAAG        | miRNA | miR-101  |
| t0032310 | 22 | 4 GTACAGTAGTGTGATAACTGAA        | miRNA | miR-101  |
| t0032184 | 21 | 4 TACAGTACTGTGATAACGGAA         | miRNA | miR-101  |
| t0031702 | 20 | 4 TACAGTACTGTGGTAACTGA          | miRNA | miR-101  |
| t0031720 | 20 | 4 TACAGTACCGTGATAACTGA          | miRNA | miR-101  |
| t0031732 | 20 | 4 TGCAGTACTGTGATAACTGA          | miRNA | miR-101  |
| t0031785 | 21 | 4 TTCAGTACTGTGATAACTGAA         | miRNA | miR-101  |
| t0031971 | 22 | 4 GTACAGTACTGTGATAACTTAA        | miRNA | miR-101  |
| t0032059 | 20 | 4 TACAGTACTGTGACAACTGA          | miRNA | miR-101  |
| t0032085 | 21 | 4 TACAGTACTGTCATAACTGAA         | miRNA | miR-101  |
| t0032086 | 21 | 4 GTACAGTACTGTGATAAATTGA        | miRNA | miR-101  |
| t0032122 | 22 | 4 TACAGTAGTGTGATAACTGAAG        | miRNA | miR-101  |
| t0032167 | 21 | 4 GTACAGTACTGTGATAACTGG         | miRNA | miR-101  |
| t0032168 | 21 | 4 TACAGTATCGTGATAACTGAA         | miRNA | miR-101  |
| t0032221 | 22 | 4 GTACAATACTGTGATAACTGAA        | miRNA | miR-101  |
| t0032278 | 21 | 4 GTGCAGTACTGTGATAACTGA         | miRNA | miR-101  |
| t0032287 | 20 | 4 TACAGTACTGTAATAACTGA          | miRNA | miR-101  |
| t0032341 | 20 | 4 TACAGTACTGTGATAACTGG          | miRNA | miR-101  |
| t0032361 | 21 | 4 TACACTACTGTGATAACTGAA         | miRNA | miR-101  |
| t0032540 | 24 | 4 ACCCTGTAGATCCGAATTTGTATC      | miRNA | miR-10   |
| t0032550 | 24 | 4 TACCCTGTAGATCCGAATTTGATC      | miRNA | miR-10   |
| t0032631 | 20 | 4 TGAGGTAGTAGTTTGTGATG          | miRNA | let-7i   |
| t0032651 | 21 | 4 TGAGGTAGAAAGTTTGTGCTGT        | miRNA | let-7i   |
| t0032662 | 20 | 4 TAAGGTAGTAGTTTGTGCTG          | miRNA | let-7i   |
| t0032709 | 20 | 4 TGAGGTAGAAAGTTTGTGCTG         | miRNA | let-7i   |
| t0032729 | 21 | 4 TGAGGTAGTAGTTTGTGGTGT         | miRNA | let-7i   |
| t0032755 | 20 | 4 TGAGGTAGTAGTTCGTGCTG          | miRNA | let-7i   |
| t0032804 | 23 | 4 TGAGGAAGTAGTTTGTGCTGTTT       | miRNA | let-7i   |
| t0032845 | 20 | 4 TGAGGCAGTAGTTTGTGCTG          | miRNA | let-7i   |
| t0032875 | 22 | 4 TGAGGTTGTAGTTTGTGCTGTT        | miRNA | let-7i   |
| t0032877 | 20 | 4 TGAGGTAGCAGTTTGTGCTG          | miRNA | let-7i   |
| t0032899 | 21 | 4 TGAGGTAGTAGTTTGCCTGT          | miRNA | let-7i   |
| t0032202 | 22 | 4 TGAGCTAGTAGTTTGTGCTGTT        | miRNA | let-7i   |
| t0032596 | 19 | 4 TGAGGTAGTAGTTTGTGAT           | miRNA | let-7i   |

|          |    |                             |       |           |
|----------|----|-----------------------------|-------|-----------|
| t0031739 | 20 | 4 TGAGGTAGTAGTTTGTGCAG      | miRNA | let-7g    |
| t0031754 | 21 | 4 TGAGGTAGTAGTCTGTACAGT     | miRNA | let-7g    |
| t0031795 | 23 | 4 TGAGGTAGTAGTTTGTGCAGTTA   | miRNA | let-7g    |
| t0031808 | 21 | 4 TGAGGTAGCAGTTTGTACAGT     | miRNA | let-7g    |
| t0032174 | 22 | 4 TGAGGTAGTAGATTGTATATTG    | miRNA | let-7f-5p |
| t0032219 | 23 | 4 TGAGGTAGTGGATTGTATAGTTT   | miRNA | let-7f-5p |
| t0032317 | 22 | 4 TGAGGTAGTAGTTTGTATTGTT    | miRNA | let-7f    |
| t0032394 | 23 | 4 TGAGGTACTAGATTGTATAGTTG   | miRNA | let-7f    |
| t0032396 | 20 | 4 TGAGGTAGTAGATCGTATAT      | miRNA | let-7f    |
| t0032553 | 23 | 4 TGAGGTAGTAGATTGGATAGTTA   | miRNA | let-7f    |
| t0032645 | 22 | 4 TGAGGTAGTAGATTTTATATTT    | miRNA | let-7f    |
| t0032693 | 22 | 4 TGAGGTAGTAGATTGTTTGGTT    | miRNA | let-7f    |
| t0032998 | 23 | 4 TGAGGTAGTAAATTGTATAGTTA   | miRNA | let-7f    |
| t0031849 | 23 | 4 TGAGGTTGTAGATTGTATAGTTA   | miRNA | let-7f    |
| t0031991 | 22 | 4 TGAGGTAGTAGCTTGTATCGTT    | miRNA | let-7f    |
| t0032464 | 23 | 4 TGAGGTAGTAGATTGCATAGTTT   | miRNA | let-7f    |
| t0032667 | 20 | 4 TGAGGTAGTAGATGGTATAG      | miRNA | let-7f    |
| t0031823 | 23 | 4 TGAGGTAGTAGATTGTGTAGTTT   | miRNA | let-7f    |
| t0031838 | 21 | 4 GAGGCAGTAGATTGTATAGTT     | miRNA | let-7f    |
| t0031719 | 23 | 4 TGGGGTAGTAGATTGTATAGTTT   | miRNA | let-7f    |
| t0031799 | 26 | 4 TGAGGTAGTAGATTGTATAGTTAAA | miRNA | let-7f    |
| t0031848 | 22 | 4 TGCGGTAGTAGCTTGTATAGTT    | miRNA | let-7f    |
| t0031916 | 23 | 4 TGAGGTAGTAGTTTGTATAGTTA   | miRNA | let-7f    |
| t0031935 | 22 | 4 TGAGATAGTAGATTGTATAGTA    | miRNA | let-7f    |
| t0031952 | 25 | 4 TGAGGTAGTAGATTGTATAGTTAAT | miRNA | let-7f    |
| t0031953 | 23 | 4 TGAAGTAGTAGATTGTATAGTTA   | miRNA | let-7f    |
| t0031974 | 23 | 4 TGAGGTCGTAGATTGTATAGTTG   | miRNA | let-7f    |
| t0032095 | 23 | 4 TGAGGTAGTAGATTGTAAAGTTG   | miRNA | let-7f    |
| t0032120 | 23 | 4 TGAGGTAATAGATTGTATAGTTA   | miRNA | let-7f    |
| t0032129 | 23 | 4 TGAGGTAGTAGATTGTATAGTCT   | miRNA | let-7f    |
| t0032192 | 22 | 4 TGAGGTAGTAGATTGCATAGTA    | miRNA | let-7f    |
| t0032215 | 23 | 4 TGAGGTAGTAGATTGTATAGTCG   | miRNA | let-7f    |
| t0032226 | 20 | 4 AGGTAGTAGATTGTATATTT      | miRNA | let-7f    |
| t0032250 | 19 | 4 TGAGGTAGTAAATTGTATA       | miRNA | let-7f    |
| t0032300 | 23 | 4 TGAGGTAGTTGATTGTATAGTTA   | miRNA | let-7f    |
| t0032338 | 21 | 4 GAGGTAGCAGATTGTATAGTT     | miRNA | let-7f    |
| t0032339 | 19 | 4 TGAGGTAGTAGATTGGATA       | miRNA | let-7f    |
| t0032360 | 21 | 4 GAGGTAGTAGATTGTATAGGT     | miRNA | let-7f    |
| t0032399 | 22 | 4 TGGGGAAGTAGATTGTATAGTT    | miRNA | let-7f    |
| t0032408 | 23 | 4 TGAGGTAGAAGATTGTATAGTTT   | miRNA | let-7f    |
| t0032418 | 22 | 4 TGAGGTAGGAGATTGTGTAGTT    | miRNA | let-7e    |
| t0032422 | 22 | 4 TGAGGTAGGAGATTGTATAGGT    | miRNA | let-7e    |
| t0032613 | 23 | 4 TGAGGTAGGAGATTGTATAGTTT   | miRNA | let-7e    |
| t0032616 | 21 | 4 AGAGGTAGTCGTTGCATAGT      | miRNA | let-7d    |
| t0032688 | 21 | 4 AGAGATAGTAGTTGCATAGT      | miRNA | let-7d    |
| t0032750 | 20 | 4 AGAGGTAATAGTTGCATAG       | miRNA | let-7d    |
| t0032827 | 22 | 4 AGAGGTAGTAGTTGCATTGTT     | miRNA | let-7d    |
| t0032831 | 20 | 4 AGAGGTAGAAGTTGCATAG       | miRNA | let-7d    |
| t0032878 | 20 | 4 AGAGTTAGTAGTTGCATAG       | miRNA | let-7d    |
| t0032902 | 22 | 4 AGAGGTAGTAGGTAGCATAGTT    | miRNA | let-7d    |
| t0032930 | 21 | 4 AAAGGTAGTAGTTGCATAGT      | miRNA | let-7d    |
| t0032953 | 21 | 4 AGCGGTAGTAGTTGCATAGT      | miRNA | let-7d    |
| t0033007 | 20 | 4 AGAGGTAGTAGTTCCATAG       | miRNA | let-7d    |
| t0031843 | 22 | 4 TGAGGTAGTAGTTTGTATGGTT    | miRNA | let-7c    |
| t0032109 | 20 | 4 TGAGGTCGTAGTTGTGTGG       | miRNA | let-7b    |
| t0032429 | 23 | 4 TGAGGTAGGAGTTGTGTGGTAA    | miRNA | let-7b    |
| t0031724 | 21 | 4 TGAGGTAGTAGGTAGTGTGGT     | miRNA | let-7b    |
| t0031771 | 23 | 4 TGAGGTAGTAGTTGTGTGGCTA    | miRNA | let-7b    |

|          |    |                            |       |            |
|----------|----|----------------------------|-------|------------|
| t0031975 | 23 | 4 TGAGGTAGTAGGATGTGTGGTTT  | miRNA | let-7b     |
| t0032058 | 24 | 4 TGAGGTAGCAGGTTGTGTGGTTAA | miRNA | let-7b     |
| t0032107 | 23 | 4 TGAGGTAGTAGGTTATGTGGTTA  | miRNA | let-7b     |
| t0032152 | 19 | 4 TGAGGTAGTAGGTCGTGTG      | miRNA | let-7b     |
| t0032465 | 23 | 4 TGAGGTAGTAGGCTGTGTGGTAA  | miRNA | let-7b     |
| t0032564 | 23 | 4 TGAGGTAGTAGGTTGTGTGGATT  | miRNA | let-7b     |
| t0032760 | 23 | 4 TGCGGTAGTAGGTTGTGTGGTTG  | miRNA | let-7b     |
| t0033002 | 23 | 4 TGAGGTAGTAGGTTGTGTGGTCG  | miRNA | let-7b     |
| t0032113 | 22 | 4 TGAGGTAGAAGGTTGTGTGGTA   | miRNA | let-7b     |
| t0031709 | 22 | 4 TGAGGTAGTAGGTTGAGTGGTA   | miRNA | let-7b     |
| t0031789 | 24 | 4 TGAGGTGGTAGGTTGTGTGGTTAA | miRNA | let-7b     |
| t0031841 | 20 | 4 TGAGGTAGTAGGTTGAGTGG     | miRNA | let-7b     |
| t0031867 | 20 | 4 TGAAGTAGTAGGTTGTGTGG     | miRNA | let-7b     |
| t0031895 | 20 | 4 TGAGGTAATAGGTTGTGTGG     | miRNA | let-7b     |
| t0031906 | 22 | 4 TGAGGAAGTAGGTTGTGGGGTT   | miRNA | let-7b     |
| t0031941 | 23 | 4 TAAGGTAGTAGGTTGTGTGGTTA  | miRNA | let-7b     |
| t0031981 | 23 | 4 TGAGGTAGTAGGTTGCGTGGTTT  | miRNA | let-7b     |
| t0032076 | 24 | 4 TGAGGTAGTGGGTTGTGTGGTTAA | miRNA | let-7b     |
| t0032079 | 23 | 4 TGAGGTAGTTGGTTGTGTGGTTT  | miRNA | let-7b     |
| t0032108 | 20 | 4 TGAGATAGTAGGTTGTGTGG     | miRNA | let-7b     |
| t0032112 | 19 | 4 CGAGGTAGTAGGTTGTGTG      | miRNA | let-7b     |
| t0032158 | 22 | 4 AGAGGTAGTAGGTTGTGTGGTA   | miRNA | let-7b     |
| t0032163 | 24 | 4 TGAGGTCGTAGGTTGTGTGGTTAA | miRNA | let-7b     |
| t0032191 | 23 | 4 TGAGGTAGTTGGTTGTGTGGTTA  | miRNA | let-7b     |
| t0032201 | 24 | 4 TGAGGCAGTAGGTTGTGTGGTTAA | miRNA | let-7b     |
| t0032234 | 23 | 4 TGGGGTAGTAGGTTGTGTGGTTT  | miRNA | let-7b     |
| t0032238 | 20 | 4 TGAGGTAGTAGGTTGTGAGG     | miRNA | let-7b     |
| t0032256 | 23 | 4 TGAGGTAGTAGGTTGTGTGGCAA  | miRNA | let-7b     |
| t0032258 | 24 | 4 TGAGGCAGTAGGTTGTGTGGTTAT | miRNA | let-7b     |
| t0032280 | 22 | 4 TGAGGTAGTAGGTTGGGTGGTA   | miRNA | let-7a     |
| t0032368 | 24 | 4 TGGGGTAGTAGGTTGTATGGTATC | miRNA | let-7-5p   |
| t0032423 | 20 | 4 TGAGGTAGTATGTTGTATAG     | miRNA | let-7      |
| t0032534 | 21 | 4 TGAGGTAGTAGGTTAGTATAGT   | miRNA | let-7      |
| t0032535 | 23 | 4 TGAGGTAGTAGGGTGTATAGTTG  | miRNA | let-7      |
| t0032555 | 19 | 4 TGAGGTGGTAGGTTGTATA      | miRNA | let-7      |
| t0032568 | 23 | 4 TGAGGTAGTAGGGTGTATAGTTA  | miRNA | let-7      |
| t0032581 | 20 | 4 TGACGTAGTAGGTTGTATAG     | miRNA | let-7      |
| t0032583 | 19 | 4 TGAGGTAGCAGGTTGTATA      | miRNA | let-7      |
| t0032699 | 20 | 4 TCAGGTAGTAGGTTGTATAG     | miRNA | let-7      |
| t0032737 | 22 | 3 CACCCGGCTGTGTGCACCTGTG   | miRNA | miR-941    |
| t0032829 | 21 | 3 CAAAGTGCTGTTCATGCAGGT    | miRNA | miR-93     |
| t0032944 | 22 | 3 CAAAGTGCTGTTCGCGCAGGTA   | miRNA | miR-93     |
| t0032457 | 23 | 3 CAAAGTGCTGTTCGTGAAGGTAG  | miRNA | miR-93     |
| t0032145 | 22 | 3 AGGGACGGGACGCGGTGCAGGG   | miRNA | miR-92b*   |
| t0031697 | 22 | 3 AGGGACGGGACGCGGTGAAGTG   | miRNA | miR-92b*   |
| t0031821 | 22 | 3 CATTGCACTTGTCCCGGCCTGT   | miRNA | miR-92a-3p |
| t0031951 | 21 | 3 TATTGCACTTGCCCGGCCTG     | miRNA | miR-92a    |
| t0031969 | 21 | 3 TATTGCACTTGTCCCGGTCTG    | miRNA | miR-92a    |
| t0032223 | 22 | 3 TATTGCACTTGTCCCGGTCTGT   | miRNA | miR-92a    |
| t0032474 | 23 | 3 TATTGCACTTGTCCCGGACTGTT  | miRNA | miR-92a    |
| t0032544 | 21 | 3 TATTGCACTTGTCCCGGGCTG    | miRNA | miR-92a    |
| t0032865 | 20 | 3 TATTGCACTTGTACAGGCCT     | miRNA | miR-92a    |
| t0034947 | 20 | 3 TATTGCACTTGTACAGGCCT     | miRNA | miR-92a    |
| t0034006 | 22 | 3 TATTACACTTGTCCCGGCCTGT   | miRNA | miR-92a    |
| t0034017 | 22 | 3 TATTGCACTTATCCCGGCCTGT   | miRNA | miR-92a    |
| t0034747 | 22 | 3 TATTGCACTTGTCCCGGCCTGT   | miRNA | miR-92a    |
| t0033055 | 22 | 3 TGTTGCACTTGTCCCGGCCTGT   | miRNA | miR-92a    |
| t0034049 | 21 | 3 TATTACACTTGTCCCGGCCTG    | miRNA | miR-92a    |

|          |    |                                   |       |             |
|----------|----|-----------------------------------|-------|-------------|
| t0035022 | 20 | 3 TATTGCAATTGTCCCGGCCT            | miRNA | miR-92a     |
| t0033032 | 22 | 3 TATTGCACTTGTCCCGGGCTGT          | miRNA | miR-92a     |
| t0033226 | 21 | 3 TATTGCACTTGTCCCGACCTG           | miRNA | miR-92a     |
| t0033246 | 18 | 3 TATTGCACTCGTCCCGGC              | miRNA | miR-92      |
| t0033405 | 21 | 3 TGGAAGACTAGTGATTTTTTT           | miRNA | miR-7b      |
| t0033588 | 23 | 3 CGAAGACTGAAGTGGAGAAGGGT         | miRNA | miR-739     |
| t0034073 | 23 | 3 TGAAGAATGAAGTGGAGAAGGGT         | miRNA | miR-739     |
| t0034131 | 23 | 3 TGAAAGACTTGAGTAGTGAGACG         | miRNA | miR-71b-5p  |
| t0034166 | 24 | 3 AAAGACTTGAGTAGTGAGACGTTT        | miRNA | miR-71b-5p  |
| t0034235 | 22 | 3 TACCCATTGCATATCGGCGTTG          | miRNA | miR-660     |
| t0034245 | 18 | 3 TGAGAACCACGTCTGCTC              | miRNA | miR-589     |
| t0034324 | 22 | 3 AAACGGCAATGACTTTTGTACA          | miRNA | miR-548al   |
| t0034603 | 23 | 3 CATGCCTTGAGTGTAGGCCCGTT         | miRNA | miR-532-5p  |
| t0034808 | 22 | 3 CTTCCACACCCAAGGCTTGCC           | miRNA | miR-532-3p  |
| t0034845 | 22 | 3 CCTCCACACCCAAGGCTTGTA           | miRNA | miR-532-3p  |
| t0035167 | 22 | 3 CCTCCACAACCAAGGCTTGCA           | miRNA | miR-532-3p  |
| t0033390 | 22 | 3 CCTCTACACCCAAGGCTTGCA           | miRNA | miR-532-3p  |
| t0034605 | 23 | 3 TCTGGGCACAGGCGGATGGACCG         | miRNA | miR-5107    |
| t0034353 | 22 | 3 TCTGGGAACAGGCGGATGGACA          | miRNA | miR-5107    |
| t0035014 | 22 | 3 TCTGGGCACAGGCGGATGGCCA          | miRNA | miR-5107    |
| t0034339 | 20 | 3 TAGCAGCGGGGACAGTTCTG            | miRNA | miR-503     |
| t0034848 | 21 | 3 TTAAGACTTGCAGGGATGTTT           | miRNA | miR-499-5p  |
| t0034283 | 28 | 3 TCCTGTAAGTACTGAGCTGCCCGAGATGGCG | miRNA | miR-486-5p  |
| t0034811 | 21 | 3 CTGTAAGTACTGAGCTGCCCGAGT        | miRNA | miR-486-5p  |
| t0033607 | 23 | 3 TCCTGTAAGTACTGAGCTGCCCGGGT      | miRNA | miR-486-5p  |
| t0034470 | 22 | 3 TACTGTAAGTACTGAGCTGCCCGAG       | miRNA | miR-486-5p  |
| t0033739 | 23 | 3 TCCTGTAAGTACTGAGCTGCACCGAGT     | miRNA | miR-486-5p  |
| t0033902 | 21 | 3 TGCTGTAAGTACTGAGCTGCCCGA        | miRNA | miR-486-5p  |
| t0034726 | 20 | 3 TCATGTAAGTACTGAGCTGCCCG         | miRNA | miR-486-5p  |
| t0034846 | 23 | 3 TCCTGAACTGAGCTGCCCGAGA          | miRNA | miR-486-5p  |
| t0034763 | 22 | 3 TCCTGTAAGTACTGAGCTGCCAAGAG      | miRNA | miR-486-5p  |
| t0035012 | 20 | 3 TCCTGTAAGTACTGAGCTGCCCA         | miRNA | miR-486-5p  |
| t0035057 | 20 | 3 TCCTGTAAGTACTGAACTGCCCG         | miRNA | miR-486-5p  |
| t0034012 | 21 | 3 TCCTGTATCGAGCTGCCCGA            | miRNA | miR-486-5p  |
| t0034078 | 23 | 3 TCATGTAAGTACTGAGCTGCCCGAGT      | miRNA | miR-486-5p  |
| t0033023 | 21 | 3 TCCTGTAAGTACTGAGCTGATCCGA       | miRNA | miR-486-5p  |
| t0033372 | 25 | 3 TCCTGTAAGTACTGAGCTGCCCGCCGGT    | miRNA | miR-486-5p  |
| t0033375 | 24 | 3 TCCTGTAAGTACTGAGCTGCCCGCGTT     | miRNA | miR-486-5p  |
| t0033432 | 22 | 3 TCCTGTAAGTACTGAGCTGACCCGAA      | miRNA | miR-486-5p  |
| t0033651 | 23 | 3 TCCTGCACTGAGCTGCCCGAGT          | miRNA | miR-486-5p  |
| t0033689 | 22 | 3 TCCTGTAAGTACTGAGCTGCACCGAG      | miRNA | miR-486-5p  |
| t0033753 | 22 | 3 TCATGTAAGTACTGAGCTGCACCGAG      | miRNA | miR-486-5p  |
| t0033792 | 28 | 3 TCCTGTAAGTACTGAGCTCCCCGAGACGGCA | miRNA | miR-486-5p  |
| t0034081 | 23 | 3 TCCTATACTGAGCTGCCCGAGT          | miRNA | miR-486-5p  |
| t0034158 | 23 | 3 TACTGTAAGTACTGAGCTGCCCGAGT      | miRNA | miR-486-5p  |
| t0034196 | 24 | 3 TCCTGTAAGTACTGAGCTGCCCGCGAA     | miRNA | miR-486-5p  |
| t0034209 | 22 | 3 TCCTGTAAGTACTGAGCTACCCCGAA      | miRNA | miR-486-5p  |
| t0034244 | 24 | 3 TCCTGTAAGTACTGAGCTGCCCGCCGG     | miRNA | miR-486-5p  |
| t0034255 | 23 | 3 TGGAGAGCAGGGAGCAGGAAGCT         | miRNA | miR-4732-5p |
| t0034278 | 23 | 3 TCTAGAGCAGGGAGCAGGAAGCT         | miRNA | miR-4732-5p |
| t0034295 | 23 | 3 TGTAAGAGCAGGGAGCAGGCAGCT        | miRNA | miR-4732-5p |
| t0034317 | 20 | 3 TGTAAGAGCAGGGGGCAGGAA           | miRNA | miR-4732-5p |
| t0034398 | 23 | 3 TGTAAGAGCAGGGGAGCAGGAAGCT       | miRNA | miR-4732-5p |
| t0034503 | 23 | 3 TGTAAGAGCAGGGGAGCAGGACGCT       | miRNA | miR-4732-5p |
| t0034651 | 23 | 3 TGTGGAGCAGGGGAGCAGGAAGCT        | miRNA | miR-4732-5p |
| t0034692 | 21 | 3 TGTAAGAGAAGGGAGCAGGAAG          | miRNA | miR-4732-5p |
| t0034750 | 23 | 3 TGCAGAGCAGGGGAGCAGGAAGCT        | miRNA | miR-4732-5p |
| t0034891 | 22 | 3 TGTGTCCGGGAAGTGGAGGAGG          | miRNA | miR-4669    |

|          |    |                              |       |             |
|----------|----|------------------------------|-------|-------------|
| t0034893 | 22 | 3 ACTGGGAAGAGGAGCTGAGGGC     | miRNA | miR-4646-5p |
| t0035013 | 21 | 3 GAAGGGTCGGGGCGGCAGGGG      | miRNA | miR-4516    |
| t0035042 | 22 | 3 TGAGGGGAGTAGGTTGTTGGTT     | miRNA | miR-4510    |
| t0033152 | 22 | 3 TGAGGCAGTAGGGTGTGTGGTT     | miRNA | miR-4510    |
| t0033559 | 22 | 3 TGAGGGATTAGGTTGTGTGGTT     | miRNA | miR-4510    |
| t0034027 | 24 | 3 TGAGGGGAGTAGGTTGTGTGGTTGA  | miRNA | miR-4510    |
| t0034040 | 21 | 3 TGAGGGGAGTAGGATGTGTGGT     | miRNA | miR-4510    |
| t0034144 | 26 | 3 AAACCGTTACCATTCTGAGTTTAGT  | miRNA | miR-451     |
| t0034430 | 20 | 3 AAACCGTAACCATTACTGAG       | miRNA | miR-451     |
| t0034616 | 23 | 3 AAACCGTTACCATTACTGAATTT    | miRNA | miR-451     |
| t0034966 | 24 | 3 AAACCGTTACCATTACTGAGATTA   | miRNA | miR-451     |
| t0034968 | 24 | 3 AAACCGTTACCATTAATGAGTTTA   | miRNA | miR-451     |
| t0034124 | 25 | 3 AAACCGTTACCATTACTCAGTTTAG  | miRNA | miR-451     |
| t0034741 | 19 | 3 AAACCGTTACCATTACTGG        | miRNA | miR-451     |
| t0034565 | 22 | 3 AAACCTTTACCGTTACTGAGTT     | miRNA | miR-451     |
| t0034240 | 21 | 3 AATCCGTTACCATTACTGAGT      | miRNA | miR-451     |
| t0034258 | 19 | 3 AAACCATTACCATTACTGA        | miRNA | miR-451     |
| t0034714 | 18 | 3 AAACCGTTACAATTACTG         | miRNA | miR-451     |
| t0034804 | 26 | 3 AAACCGTTAACATTACTGAGTTTAGT | miRNA | miR-451     |
| t0034911 | 26 | 3 AAACCGTTACCATTACTGAGTTAGT  | miRNA | miR-451     |
| t0033048 | 19 | 3 GAACCGTTACCATTACTGA        | miRNA | miR-451     |
| t0033163 | 25 | 3 AAATCGTTACCATTACTGAGTTAG   | miRNA | miR-451     |
| t0033184 | 23 | 3 AAACAGTTAACATTACTGAGTTT    | miRNA | miR-451     |
| t0033322 | 24 | 3 AAACCATTACCATTACTGAGTTTA   | miRNA | miR-451     |
| t0033334 | 22 | 3 AAACCTTTACCATTACTGAGCT     | miRNA | miR-451     |
| t0033346 | 21 | 3 AAACCTTTACCGTTACTGAGT      | miRNA | miR-451     |
| t0033361 | 19 | 3 AAACCGTTACCATTCTGA         | miRNA | miR-451     |
| t0033389 | 19 | 3 AAACCGTTACCATCACTGA        | miRNA | miR-451     |
| t0033472 | 18 | 3 AAACCGTTAACATTACTG         | miRNA | miR-451     |
| t0033504 | 20 | 3 AAACCGTTACCATAACTGAG       | miRNA | miR-451     |
| t0033720 | 24 | 3 AAACCGTTACCGTTACTGAGTTTA   | miRNA | miR-451     |
| t0033754 | 24 | 3 AAACCGTAACCATTACTGAGTTTA   | miRNA | miR-451     |
| t0033788 | 24 | 3 AAACCGTTACTATTACTGAGTTTA   | miRNA | miR-451     |
| t0033826 | 24 | 3 AAACCGGTACCATTACTGAGTTTA   | miRNA | miR-451     |
| t0033974 | 20 | 3 AAACAGTTACCATTAATGAG       | miRNA | miR-451     |
| t0034021 | 23 | 3 AAACCGTAACCATTACTGAGTTT    | miRNA | miR-451     |
| t0034135 | 20 | 3 AAACCGTTTCCATTACTGAG       | miRNA | miR-451     |
| t0034179 | 23 | 3 AAACCGTTTCCATTACTGAGTTT    | miRNA | miR-451     |
| t0034230 | 22 | 3 AAACCTTTACCATTGCTGAGTT     | miRNA | miR-451     |
| t0034354 | 21 | 3 TTCGGGGTCTGGGCGCGGCGC      | miRNA | miR-4508    |
| t0034378 | 22 | 3 TGGAGAGAAAGGCAGTTTTTGC     | miRNA | miR-4306    |
| t0034541 | 20 | 3 TGCAGCATTGTACAGGGCTA       | miRNA | miR-4289    |
| t0034656 | 21 | 3 AGAAGCATTGTACAGGGCTAA      | miRNA | miR-4289    |
| t0034658 | 20 | 3 ACCAGCATTGTACAGGGCTA       | miRNA | miR-4289    |
| t0034679 | 19 | 3 CAGCAGCATTTCATGTTTT        | miRNA | miR-424     |
| t0034685 | 21 | 3 TGAGGGGCAGAGAGAGGGACT      | miRNA | miR-423-5p  |
| t0034729 | 24 | 3 TAAGGGGCAGAGAGCGAGACTTTT   | miRNA | miR-423-5p  |
| t0034740 | 21 | 3 TGAGGGGCAGAGAGCGCGCCT      | miRNA | miR-423-5p  |
| t0034749 | 22 | 3 TGAGGGGCAGAGAGAGAGACTA     | miRNA | miR-423-5p  |
| t0034912 | 24 | 3 TGAGGTGCAGAGAGCGAGACTTTT   | miRNA | miR-423-5p  |
| t0035116 | 22 | 3 TGATGGGCAGAGAGCGAGATTT     | miRNA | miR-423-5p  |
| t0035183 | 24 | 3 TGAGGGGCAGCGAGCGAGACTTTT   | miRNA | miR-423-5p  |
| t0034187 | 19 | 3 TGAGGGGTAGAGAGCGAGA        | miRNA | miR-423-5p  |
| t0034272 | 23 | 3 TGAGGGGCAGAGAGTGAGAATTT    | miRNA | miR-423-5p  |
| t0033151 | 19 | 3 TGAGGGGCGGAGAGCGAGA        | miRNA | miR-423-5p  |
| t0033800 | 21 | 3 TGAGGGGCAGAGAGCGAGCCC      | miRNA | miR-423-5p  |
| t0033898 | 23 | 3 TGAAGGGCAGAGAGCGAGACTTA    | miRNA | miR-423-5p  |
| t0035063 | 22 | 3 TGAGGGGCAGAGAGCGAGACGT     | miRNA | miR-423-5p  |

|          |    |                                |       |             |
|----------|----|--------------------------------|-------|-------------|
| t0033065 | 23 | 3 AGAGGGGCAGAGAGCGAGACTTA      | miRNA | miR-423-5p  |
| t0033182 | 22 | 3 TGAGGGGCAGAGAGCGAGCCTA       | miRNA | miR-423-5p  |
| t0033192 | 24 | 3 TGAGGGGCAGAGAGAGAGACTTTA     | miRNA | miR-423-5p  |
| t0033255 | 23 | 3 TGAGGGGCAGAGAGCGAGCCTTG      | miRNA | miR-423-5p  |
| t0033316 | 19 | 3 TGAGGGGCAGAGAGCGAGG          | miRNA | miR-423-5p  |
| t0033327 | 24 | 3 TGAGAGGCAGAGAGCGAGACTTTT     | miRNA | miR-423-5p  |
| t0033424 | 20 | 3 TGAGGGGCAGAGAGCGAGTC         | miRNA | miR-423-5p  |
| t0033586 | 19 | 3 TAAGGGGCAGAGAGCGAGA          | miRNA | miR-423-5p  |
| t0033589 | 20 | 3 CGAGGGGCAGAGAGCGAGAC         | miRNA | miR-423-5p  |
| t0033614 | 22 | 3 TGAGGGGCAGAGAGTGAGAATT       | miRNA | miR-423-5p  |
| t0033648 | 19 | 3 TGAGGGGCAGAGAGCGCGA          | miRNA | miR-423-5p  |
| t0033659 | 23 | 3 TGAGGGGCAAAGAGCGAGACTTA      | miRNA | miR-423-5p  |
| t0033660 | 24 | 3 TGAGGGGCAGAGCGCGAGACTTTA     | miRNA | miR-423-5p  |
| t0033785 | 24 | 3 TGAGGGGCACAGAGCGAGACTTTT     | miRNA | miR-423-5p  |
| t0033856 | 22 | 3 TGAGGGGCAGAGAGCGCGCCTT       | miRNA | miR-423-5p  |
| t0034120 | 20 | 3 TGAGGGGCGGAGAGCGAGAC         | miRNA | miR-423-5p  |
| t0034220 | 21 | 3 TGAGGGGCAGAGCGCGAGCCT        | miRNA | miR-423-5p  |
| t0034222 | 20 | 3 TGAGAGGCAGAGAGCGAGAC         | miRNA | miR-423-5p  |
| t0034242 | 23 | 3 TGAGGGGCAGAAAGCGAGACTTA      | miRNA | miR-423-5p  |
| t0034282 | 23 | 3 TGAGGGGCAGAGAGCGGGACTTG      | miRNA | miR-423-5p  |
| t0034355 | 20 | 3 TGAGGAGCAGAGAGCGAGAC         | miRNA | miR-423-5p  |
| t0034411 | 19 | 3 TGAGGGACAGAGAGCGAGA          | miRNA | miR-423-5p  |
| t0034418 | 21 | 3 TCAGGTAGTAGTTTGTACAGT        | miRNA | miR-3962    |
| t0034428 | 20 | 3 GGCCTCGGCGGCGGCGGGAC         | miRNA | miR-3885-5p |
| t0034434 | 19 | 3 TGGCGGCGGCGGCGGGGGC          | miRNA | miR-3885-5p |
| t0034563 | 21 | 3 GGGGCCGCGGCGGCGGCGGAC        | miRNA | miR-3885-5p |
| t0034604 | 21 | 3 GCGGCGGCGGCGGGGTGTGG         | miRNA | miR-3885-5p |
| t0034735 | 28 | 3 CCGGCGGCGGCGGCGACTCTGGACGCGA | miRNA | miR-3885-5p |
| t0034757 | 22 | 3 TCGGGGCGGCGGCGGCGGTAGA       | miRNA | miR-3885-5p |
| t0034849 | 23 | 3 TCGGGGCGGCGGCGGCGGCGGTG      | miRNA | miR-3885-5p |
| t0034871 | 18 | 3 CGGCGGCGGCGGCGGGAC           | miRNA | miR-3885-5p |
| t0034936 | 20 | 3 GCGGCGGCGGCGGGGTGTGGG        | miRNA | miR-3885-5p |
| t0034939 | 20 | 3 CGGCGTCGGCGGCGGCGGGA         | miRNA | miR-3885-5p |
| t0035052 | 19 | 3 GGGCGGCGGCGGGGGGAGA          | miRNA | miR-3885-5p |
| t0035085 | 23 | 3 ACTGGACTTGGAGTCAGAAGGTG      | miRNA | miR-378f    |
| t0034754 | 21 | 3 ACTGGAATTGGAGTCAGAAGG        | miRNA | miR-378     |
| t0033251 | 23 | 3 ACTGGACTTGGAGTCAGACGGCA      | miRNA | miR-378     |
| t0033336 | 23 | 3 ACTGGAATTGGAGTCAGAAGGCA      | miRNA | miR-378     |
| t0033443 | 23 | 3 ACTGGGCTTGGAGTCAGAAGGCA      | miRNA | miR-378     |
| t0033615 | 22 | 3 ACTGGACTTGGAGACAGAAGGC       | miRNA | miR-378     |
| t0033657 | 24 | 3 ACTGGACTTGGAGTCAGAAGGCTC     | miRNA | miR-378     |
| t0033916 | 23 | 3 ACTGGACTTTGAGTCAGAAGGCA      | miRNA | miR-378     |
| t0034146 | 22 | 3 CTGGACTTGGAGTCAGACGGCA       | miRNA | miR-378     |
| t0034375 | 22 | 3 ATATAATACAACCTGTAAAGTG       | miRNA | miR-374     |
| t0034460 | 22 | 3 ATATAATACAACCTGATAAGTG       | miRNA | miR-374     |
| t0035072 | 22 | 3 ATGTAATACAACCTGCTAAGTG       | miRNA | miR-374     |
| t0035086 | 22 | 3 ATTGCACGGTATCCATCTGTAC       | miRNA | miR-363     |
| t0035189 | 22 | 3 AATTGCACGGTATCCATCTGTC       | miRNA | miR-363     |
| t0033420 | 19 | 3 CGGGGGTGGGGTCGGCGGG          | miRNA | miR-3621    |
| t0033460 | 27 | 3 AACTTTGAAGAATGAAGTGGAGAAGGG  | miRNA | miR-3526    |
| t0033522 | 23 | 3 TGAAGACTGAAGTGAAGAAGGGT      | miRNA | miR-3526    |
| t0033969 | 28 | 3 AACTTTGAAGACTGAAGTGGAGAAGGGA | miRNA | miR-3526    |
| t0034181 | 25 | 3 TGAAGACTGAAGTGGAGAAGGGCTT    | miRNA | miR-3526    |
| t0035009 | 24 | 3 TTGAAGACTGAAGTGGAGAAGGGC     | miRNA | miR-3526    |
| t0035040 | 28 | 3 AACTCTGAAGACTGAAGTGGAGAAGGGT | miRNA | miR-3526    |
| t0035058 | 27 | 3 ACTTTGAAGACTGAAGGGGAGAAGGGT  | miRNA | miR-3526    |
| t0034100 | 25 | 3 TGAAGACCGAAGTGGAGAAGGGTTT    | miRNA | miR-3526    |
| t0034473 | 23 | 3 TGAAGACTGAAGTAGAGAAGGGT      | miRNA | miR-3526    |

|          |    |                                |       |            |
|----------|----|--------------------------------|-------|------------|
| t0034695 | 23 | 3 TGAAGACTGAATTGGAGAAGGGT      | miRNA | miR-3526   |
| t0034111 | 23 | 3 TGAAGACTAAAGTGGAGAAGGGT      | miRNA | miR-3526   |
| t0034443 | 28 | 3 AACTTTGAAGACCGAAGTGGAGAAGGGT | miRNA | miR-3526   |
| t0034319 | 25 | 3 TGAAGACTGAAGTGGAGCAGGGTTT    | miRNA | miR-3526   |
| t0033074 | 23 | 3 TGAAGACTGAGGTGGAGAAGGGT      | miRNA | miR-3526   |
| t0033108 | 27 | 3 AACTTTGAAGACTGAAGAGGAGAAGGG  | miRNA | miR-3526   |
| t0033117 | 22 | 3 CGCCCGGCGTCTGGACGTTTTT       | miRNA | miR-3496   |
| t0033259 | 21 | 3 AGAAGACTGCCGCTCGTTTTT        | miRNA | miR-3494   |
| t0033267 | 21 | 3 TCCGTGCTGAGATTCGTCAT         | miRNA | miR-3492   |
| t0033363 | 22 | 3 TCCTCGAACTGTTGTGGCCATA       | miRNA | miR-3487   |
| t0033558 | 22 | 3 TCTCACACAGAAATCGCACCTG       | miRNA | miR-342-3p |
| t0033932 | 22 | 3 TCTCACAAAGAAATCGCACCCG       | miRNA | miR-342-3p |
| t0034033 | 22 | 3 TCTCACACAGAGATCGCACCCG       | miRNA | miR-342-3p |
| t0034044 | 22 | 3 TCTCACGCAGAAATCGCACCCG       | miRNA | miR-342-3p |
| t0034113 | 22 | 3 TCTCACACAGAAATCCCACCCG       | miRNA | miR-342-3p |
| t0034356 | 22 | 3 TATCACACAGAAATCGCACCCG       | miRNA | miR-342-3p |
| t0034433 | 24 | 3 TCTCACACAGAAATCGAACCCGTC     | miRNA | miR-342-3p |
| t0034923 | 23 | 3 TCTCACACAGAAATTGCACCCGT      | miRNA | miR-342-3p |
| t0035126 | 21 | 3 CTCACACAGAAATCGCACCCG        | miRNA | miR-342-3p |
| t0034024 | 23 | 3 TCCACACAGAAATCGCACCCGT       | miRNA | miR-342-3p |
| t0033644 | 25 | 3 TCTCACACAGAAATCGCCCCGTCT     | miRNA | miR-342-3p |
| t0034261 | 22 | 3 TCTCACACAGAAATTGCACCCG       | miRNA | miR-342-3p |
| t0034463 | 24 | 3 TCTCACACAGAAATAGCACCCGTC     | miRNA | miR-342-3p |
| t0033525 | 24 | 3 TCTCACACAGAAATCGCACCCGGC     | miRNA | miR-342-3p |
| t0033635 | 23 | 3 TCTCACACAGAAATCACACCCGT      | miRNA | miR-342-3p |
| t0033696 | 21 | 3 TGGCCCTCTTGCCCTTCCGA         | miRNA | miR-328a   |
| t0034001 | 23 | 3 AAAAGATGGGTTGAGAGGGCGTT      | miRNA | miR-320d   |
| t0034045 | 22 | 3 AAAAGCTGGGTTGAGAGGGAGG       | miRNA | miR-320d   |
| t0034129 | 23 | 3 AAAAGCTGGATTGAGAGGGCGTA      | miRNA | miR-320d   |
| t0034269 | 23 | 3 AAAAGCTGGGTTGAGAGCGCGTA      | miRNA | miR-320d   |
| t0034284 | 23 | 3 AAAAGCTGGGTTGAGAGGGCGTT      | miRNA | miR-320d   |
| t0034298 | 22 | 3 AAAAGCTGGGTTGAGAGTGCCT       | miRNA | miR-320d   |
| t0034329 | 22 | 3 CAAAGCTGGGTTGAGAGGGCGT       | miRNA | miR-320d   |
| t0034807 | 22 | 3 AAAAGCTGGGTGGAGAGGGCGT       | miRNA | miR-320d   |
| t0034962 | 22 | 3 AAAAGCTGGGTTGAGAGGGGAA       | miRNA | miR-320d   |
| t0035003 | 23 | 3 AAAAGCTGGGTTGAGAGAGCGTT      | miRNA | miR-320d   |
| t0035104 | 21 | 3 AAAGCTGGGTTGAGAGGGAGT        | miRNA | miR-320d   |
| t0035190 | 23 | 3 AAGAGCTGGGTTGAGAGGGCGTA      | miRNA | miR-320d   |
| t0033409 | 24 | 3 AAAAGCTGGGTTGAGAGGGCGCTA     | miRNA | miR-320d   |
| t0033030 | 23 | 3 AAAAGCTGGGTTGAGAGCGCGTT      | miRNA | miR-320d   |
| t0033060 | 23 | 3 AAAAGCTGGGTTGAGAGGGTGT       | miRNA | miR-320d   |
| t0033066 | 20 | 3 AAAGCTGGGTTGAGAGGGTG         | miRNA | miR-320d   |
| t0033081 | 22 | 3 AAAGCTGGGTTGAGAGGGCGT        | miRNA | miR-320d   |
| t0033107 | 23 | 3 AAAAGCTGGGTTGTGAGGGCGTA      | miRNA | miR-320d   |
| t0033110 | 23 | 3 AAAAGCTGGGTTGCGAGGGCGTT      | miRNA | miR-320d   |
| t0033603 | 24 | 3 AAAAGCTGGGTTGAGAGGGAGAAA     | miRNA | miR-320d   |
| t0033647 | 23 | 3 ACAAGCTGGGTTGAGAGGGCGTT      | miRNA | miR-320d   |
| t0033741 | 23 | 3 AAACGCTGGGTTGAGAGGGCGTT      | miRNA | miR-320d   |
| t0033809 | 22 | 3 AAATGCTGGGTTGAGAGGGCGT       | miRNA | miR-320d   |
| t0033885 | 22 | 3 AAAAGCTGGGTTGAGAGGCCGT       | miRNA | miR-320d   |
| t0033939 | 22 | 3 GAAAAGCTGGGTTGAGAGGGAG       | miRNA | miR-320d   |
| t0034174 | 23 | 3 AAAAGCTGGGTTGAGACGGCGTA      | miRNA | miR-320d   |
| t0034180 | 23 | 3 AAAAGCTGGGTTGAGAGGACGTT      | miRNA | miR-320d   |
| t0034340 | 24 | 3 AAAAGCTGGGTTGAGAGGGAGATA     | miRNA | miR-320d   |
| t0034366 | 23 | 3 AAAAGCTGGGTTGAGAGGGCCTT      | miRNA | miR-320d   |
| t0034390 | 23 | 3 AAAAGCTGGGTTGAGAGGGCCTA      | miRNA | miR-320d   |
| t0034467 | 23 | 3 AACAGCTGGGTTGAGAGGGCGTT      | miRNA | miR-320d   |
| t0034522 | 22 | 3 AAAAGCTGGGTTGAGCGGGCAA       | miRNA | miR-320b   |



|          |    |                             |       |             |
|----------|----|-----------------------------|-------|-------------|
| t0034557 | 21 | 3 AAAAGCTGGGTTGAGAAGGCA     | miRNA | miR-320b    |
| t0034587 | 22 | 3 AAATGCTGGGTTGAGAGGGCGA    | miRNA | miR-320a    |
| t0034589 | 23 | 3 AAAAGGTGGGTTGAGAGGGCGAA   | miRNA | miR-320a    |
| t0034661 | 20 | 3 AAAGCTGGGTTCGAGAGGGCG     | miRNA | miR-320a    |
| t0034702 | 23 | 3 AGAAGCTGGGTTGAGAGGGCGAT   | miRNA | miR-320a    |
| t0034931 | 23 | 3 AAAAGCTGGGTTGTGAGGGCGAA   | miRNA | miR-320a    |
| t0034937 | 23 | 3 ATAAGCTGGGTTGAGAGGGCGAA   | miRNA | miR-320a    |
| t0034948 | 23 | 3 AAAAGCTGGGTTGTGAGGGCGAT   | miRNA | miR-320a    |
| t0035070 | 23 | 3 AAAAGCTGGGTTGAGTGGGCGAT   | miRNA | miR-320a    |
| t0035111 | 21 | 3 AAAAAGCTGGGTTGAGAGGGCG    | miRNA | miR-320a    |
| t0035117 | 23 | 3 CAAAGCTGGGTTGAGAGGGCGAA   | miRNA | miR-320a    |
| t0035148 | 23 | 3 AAAAGCTGGGTTGAGAGAGCGAT   | miRNA | miR-320a    |
| t0033249 | 24 | 3 AAAAGCTGGGGTGAGAGGGCGATT  | miRNA | miR-320a    |
| t0035028 | 22 | 3 AATAGCTGGGTTGAGAGGGCGA    | miRNA | miR-320a    |
| t0033036 | 21 | 3 AACAGCTGGGTTGAGAGGGCG     | miRNA | miR-320a    |
| t0033161 | 23 | 3 AAAAGCTGGGTTGACAGGGCGAT   | miRNA | miR-320a    |
| t0033254 | 20 | 3 AAAGCTGGGTTGAGGGGGCG      | miRNA | miR-320a    |
| t0033356 | 23 | 3 CAAAGCTGGGTTGAGAGGGCGAT   | miRNA | miR-320a    |
| t0033410 | 22 | 3 AAAGCTGGGATGAGAGGGCGAA    | miRNA | miR-320a    |
| t0033449 | 21 | 3 AAAAGCTGGGTTGAGGGGGCG     | miRNA | miR-320a    |
| t0033477 | 23 | 3 AAAAGCTGGGTTCGAGAGGGCGAT  | miRNA | miR-320a    |
| t0033505 | 23 | 3 AGTCTGAGAAGGCGACAAGGTT    | miRNA | miR-3200-5p |
| t0033774 | 23 | 3 TCTGGGAGGTTGTAGCAGTGGAA   | miRNA | miR-3192    |
| t0033849 | 21 | 3 GTGGAAGGGAGACGGCCAGAG     | miRNA | miR-3190    |
| t0034072 | 22 | 3 TGGGACAAACGGACGGTTTTTT    | miRNA | miR-3122    |
| t0034205 | 21 | 3 TGTA AACATCCTAAACTCTCA    | miRNA | miR-30c     |
| t0034273 | 24 | 3 TGTA AACATCCTACACTCTCCGCT | miRNA | miR-30c     |
| t0034382 | 22 | 3 TGTA AAAATCCTACACTCAGCT   | miRNA | miR-30b     |
| t0034481 | 25 | 3 CTTTCAGTCGGATGTTTGAAGCATC | miRNA | miR-30a*    |
| t0034736 | 24 | 3 TGTA AACATCCTCGACTGGAAATC | miRNA | miR-30a     |
| t0034790 | 23 | 3 TAGCACCATCTGAAATCGGTTAT   | miRNA | miR-29c     |
| t0034873 | 22 | 3 TAGCACCATTTGAAATCGGTTT    | miRNA | miR-29a     |
| t0034958 | 20 | 3 GCGCGGGTCGGGGGGCGGGG      | miRNA | miR-2981    |
| t0035030 | 24 | 3 CGGGTCGGGGGGCGGGGCGGACTG  | miRNA | miR-2981    |
| t0033482 | 19 | 3 GCGGGCGGGGGCGGGGCGGGC     | miRNA | miR-2885    |
| t0033421 | 20 | 3 GCGGGATGTAGCCAAGAGGA      | miRNA | miR-270     |
| t0033949 | 22 | 3 CTCAAGTAATTCAGGATAGGTT    | miRNA | miR-26b     |
| t0033292 | 22 | 3 TTCAAGTAATTAAGGATAGGTT    | miRNA | miR-26b     |
| t0033462 | 18 | 3 AAGTAATTCAGGATAGGT        | miRNA | miR-26b     |
| t0033663 | 21 | 3 TTCAAGAAATTCAGGATAGGT     | miRNA | miR-26b     |
| t0034048 | 21 | 3 TTCAAGTAATTCAGGATAGGT     | miRNA | miR-26b     |
| t0034568 | 21 | 3 TTCAAGTGATTCAGGATAGGT     | miRNA | miR-26b     |
| t0033691 | 22 | 3 TTCAAGAAATCCAGGATAGGCT    | miRNA | miR-26a     |
| t0034926 | 22 | 3 TTCAAGTAATACAGGATAGGCA    | miRNA | miR-26a     |
| t0034199 | 22 | 3 TTCAAGTAATCCCGGATAGGCT    | miRNA | miR-26a     |
| t0033429 | 22 | 3 TTCAAGTAATCCAGGATCGGCA    | miRNA | miR-26a     |
| t0034401 | 22 | 3 TTCAAGTAATCCAGGATGGGCT    | miRNA | miR-26a     |
| t0034954 | 22 | 3 TTCAAGTAATCAAGGATAGGCT    | miRNA | miR-26a     |
| t0033411 | 22 | 3 TGAGGTAGGAGGGTGTGTGGTT    | miRNA | miR-265     |
| t0033026 | 21 | 3 AGGCGGAGACTTGGGCGATTG     | miRNA | miR-25*     |
| t0033486 | 21 | 3 CTTTGC ACTTGTCTCGGTCTG    | miRNA | miR-25      |
| t0033513 | 21 | 3 CATTGCACTTTTCTCGGTCTG     | miRNA | miR-25      |
| t0033585 | 21 | 3 CATTGCAGTTGTCTCGGTCTG     | miRNA | miR-25      |
| t0033894 | 22 | 3 CATTGCACTTGTCTCGTTCTGA    | miRNA | miR-25      |
| t0034733 | 22 | 3 CATGGCACTTGTCTCGGTCTGA    | miRNA | miR-25      |
| t0033499 | 22 | 3 CATTGCACTTGTCTCGATCTGA    | miRNA | miR-25      |
| t0034362 | 21 | 3 CATAGCACTTGTCTCGGTCTG     | miRNA | miR-25      |
| t0034397 | 21 | 3 GATTGCACTTGTCTCGGTCTG     | miRNA | miR-25      |

|          |    |                               |       |              |
|----------|----|-------------------------------|-------|--------------|
| t0034832 | 20 | 3 CATTGCACTTGTCTCGGGCT        | miRNA | miR-25       |
| t0034869 | 21 | 3 CACTGCACTTGTCTCGGTCTG       | miRNA | miR-25       |
| t0035098 | 22 | 3 CATTGCACATGTCTCGGTCTGA      | miRNA | miR-25       |
| t0034964 | 21 | 3 CATTGCACTTGTCTCGGTCCG       | miRNA | miR-25       |
| t0034212 | 20 | 3 CATTGCACTTGTCTCGGCCT        | miRNA | miR-25       |
| t0033351 | 22 | 3 CATTGAAATTGTCTCGGTCTGA      | miRNA | miR-25       |
| t0033366 | 24 | 3 TGGCTCAGTTCAGCAGGAACCGTT    | miRNA | miR-24b      |
| t0033376 | 22 | 3 TGGCTCAGTTCAGCAGGCACAG      | miRNA | miR-24       |
| t0033441 | 19 | 3 ATCACATTGCCAGGGCTTT         | miRNA | miR-23a      |
| t0033454 | 19 | 3 ATCACACTGCCAGGGATTT         | miRNA | miR-23a      |
| t0033467 | 19 | 3 ATCACATCGCCAGGGATTT         | miRNA | miR-23a      |
| t0033509 | 19 | 3 ATCACATTGACAGGGATTT         | miRNA | miR-23a      |
| t0033576 | 19 | 3 ATCACATTGCCAGGGAGTT         | miRNA | miR-23a      |
| t0033801 | 20 | 3 AAGCTGCCAGTTGAAGACCT        | miRNA | miR-22-3p    |
| t0034087 | 22 | 3 TGTCAGTTTGTCAAATACCCCC      | miRNA | miR-223      |
| t0034690 | 23 | 3 AGCTACATCTGGCTACTGGGGCT     | miRNA | miR-222      |
| t0034721 | 21 | 3 AGCCACATCTGGCTACTGGGT       | miRNA | miR-222      |
| t0034886 | 20 | 3 TGA CTGGGGCGGGACATCTG       | miRNA | miR-219-2-3p |
| t0035135 | 24 | 3 GACTGGGGCGGGACATCTGTTAAA    | miRNA | miR-219-2-3p |
| t0034370 | 26 | 3 TAGCTTGT CAGACTGATGTTGACATC | miRNA | miR-21       |
| t0033896 | 26 | 3 TAGCTTATAAGACTGATGTTGACATC  | miRNA | miR-21       |
| t0033746 | 21 | 3 TAGCTTATCAGGCTGATGTTG       | miRNA | miR-21       |
| t0033855 | 23 | 3 CAAAGTGCTCATAGTGCAGGGAG     | miRNA | miR-20b      |
| t0034117 | 22 | 3 TAAAGTGCTTATAGTGCAGGGA      | miRNA | miR-20       |
| t0034780 | 21 | 3 TAAAGTGCTTACAGTGCAGGT       | miRNA | miR-20       |
| t0035094 | 24 | 3 TGAATGTAAAGAAGTATGTATTC     | miRNA | miR-1a       |
| t0033566 | 21 | 3 TGTGCAAATACATGCAAAACT       | miRNA | miR-19b      |
| t0033907 | 21 | 3 TGTGCAAATCCATGCAAAATT       | miRNA | miR-19b      |
| t0033256 | 18 | 3 TGAGGTAGTTTGTATAGT          | miRNA | miR-1961     |
| t0034682 | 20 | 3 TGACCTATGAATTGAAAGCC        | miRNA | miR-192      |
| t0033909 | 21 | 3 CTGACCTACGAATTGACAGCC       | miRNA | miR-192      |
| t0034151 | 21 | 3 CTGACCTATGAATTGGCAGCC       | miRNA | miR-192      |
| t0034056 | 22 | 3 TGACCTATGAATTGACAGCCCG      | miRNA | miR-192      |
| t0034415 | 23 | 3 TGACCTATGAATTGACAGACAGA     | miRNA | miR-192      |
| t0034827 | 24 | 3 TGACCTATGAATTGACAGCCCGAA    | miRNA | miR-192      |
| t0034758 | 21 | 3 CTGACCTATGAATTGACAGAA       | miRNA | miR-192      |
| t0034976 | 24 | 3 TGACCTATGAATTGACAGACAGTA    | miRNA | miR-192      |
| t0034999 | 20 | 3 TGACCTATGAATTGACGGCC        | miRNA | miR-192      |
| t0033308 | 21 | 3 TGACCTATGAATTGACAGCAA       | miRNA | miR-192      |
| t0033206 | 23 | 3 AACGGAATCCTAAAAGCAGCTGA     | miRNA | miR-191      |
| t0033713 | 23 | 3 CAACGGAATCCCGAAAGCAGCTG     | miRNA | miR-191      |
| t0033101 | 22 | 3 CAACGGAATCCCAAAAAGCAACT     | miRNA | miR-191      |
| t0033465 | 23 | 3 CAACGCAATCCCAAAAAGCAGCTG    | miRNA | miR-191      |
| t0033474 | 20 | 3 CAACGGAATCCCAAAAAGCCG       | miRNA | miR-191      |
| t0033567 | 21 | 3 AACGGAATCCAAAAAGCAGCT       | miRNA | miR-191      |
| t0033671 | 23 | 3 CAACGGAGTCCCAAAAAGCAGCTG    | miRNA | miR-191      |
| t0033718 | 23 | 3 CAACGGAATCCCAAAAAGCAGCTG    | miRNA | miR-191      |
| t0033808 | 23 | 3 CAACGGAATCCCAAAAAGCAGTTG    | miRNA | miR-191      |
| t0033929 | 22 | 3 CATCGGAATCCCAAAAAGCAGCT     | miRNA | miR-191      |
| t0034060 | 22 | 3 CAACGGAATCCCAAACGCAGCT      | miRNA | miR-191      |
| t0034617 | 22 | 3 CAACGGAAACCCAAAAGCAGCT      | miRNA | miR-191      |
| t0034696 | 21 | 3 CAACGGAATCCCAAAAAGCCGC      | miRNA | miR-191      |
| t0033237 | 22 | 3 CCACGGAATCCCAAAAAGCAGCT     | miRNA | miR-191      |
| t0033250 | 22 | 3 CAACGGAATCCCAACAGCAGCT      | miRNA | miR-191      |
| t0033271 | 22 | 3 CAACGGTATCCCAAAAAGCAGCT     | miRNA | miR-191      |
| t0033407 | 23 | 3 CAACGGAATCCCAAAAACAGCTG     | miRNA | miR-191      |
| t0033463 | 21 | 3 CAACGAAATCCCAAAAAGCAGC      | miRNA | miR-191      |
| t0033494 | 24 | 3 CAACGGAATCCCAACAAGCAGCTGA   | miRNA | miR-191      |

|          |    |                            |       |         |
|----------|----|----------------------------|-------|---------|
| t0033536 | 24 | 3 CAACGAAATCCCAAAGCAGCTGT  | miRNA | miR-191 |
| t0033542 | 23 | 3 AACGGAATCACAAAAGCAGCTGA  | miRNA | miR-191 |
| t0033620 | 24 | 3 CAACGGAATCCCAAAGCAGATGA  | miRNA | miR-191 |
| t0033683 | 22 | 3 AACGGAATCACAAAAGCAGCTG   | miRNA | miR-191 |
| t0033738 | 20 | 3 CAACAGAATCCCAAAGCAG      | miRNA | miR-191 |
| t0033965 | 23 | 3 TGCAGAGAAAGGCAGTTCCTGAA  | miRNA | miR-185 |
| t0033973 | 23 | 3 TGGAGAGAAAGGAAGTTACTGAA  | miRNA | miR-185 |
| t0034200 | 22 | 3 TGGAGAGAAAGGAAGATCCTGA   | miRNA | miR-185 |
| t0034211 | 21 | 3 TGGATAGAAAGGCAGTTCCTG    | miRNA | miR-185 |
| t0034267 | 20 | 3 TGGAGAGAAGGGCAGTTCCT     | miRNA | miR-185 |
| t0034277 | 23 | 3 TGGAGAGAAAGGCAGGTCCTGAG  | miRNA | miR-185 |
| t0034424 | 20 | 3 TGGAGAGAGAGGCAGTTCCT     | miRNA | miR-185 |
| t0034465 | 20 | 3 TGGCGAGAAAGGCAGTTCCT     | miRNA | miR-185 |
| t0034537 | 23 | 3 TGGAGAGTAAGGCAGTTCCTGAA  | miRNA | miR-185 |
| t0034540 | 22 | 3 TGGAGAGCAAGGAAGTTCCTGA   | miRNA | miR-185 |
| t0034698 | 20 | 3 TGGAGAGTAAGGCAGTTCCT     | miRNA | miR-185 |
| t0034805 | 22 | 3 TGGAGAGAAAGGAAGTTCCTTA   | miRNA | miR-185 |
| t0034835 | 23 | 3 TGGATAGAAAGGCAGTTCCTGAA  | miRNA | miR-185 |
| t0033042 | 22 | 3 TGGAGAGAAAGGCAGTCCCTGC   | miRNA | miR-185 |
| t0033047 | 20 | 3 TAGAGAGAAAGGCAGTTCCT     | miRNA | miR-185 |
| t0033120 | 23 | 3 TGGAGAGAAAGGCAGTCCCTGAT  | miRNA | miR-185 |
| t0033126 | 22 | 3 TGGAGAGAAAGGCAGTTTCTGC   | miRNA | miR-185 |
| t0033201 | 23 | 3 CGGAGAGAAAGGCAGTTCCTGAG  | miRNA | miR-185 |
| t0033203 | 22 | 3 TGGAGAGAAAGGAAGTTCCTGA   | miRNA | miR-185 |
| t0033350 | 23 | 3 TGGAGTGAAGGCAGTTCCTGAT   | miRNA | miR-185 |
| t0033466 | 23 | 3 TGGAGAGAAAGGCAGTTCCTGAG  | miRNA | miR-185 |
| t0033471 | 22 | 3 TGGCGAGAAAGGAAGTTCCTGA   | miRNA | miR-185 |
| t0033483 | 23 | 3 TGGAGAGAAAGGCAGTTCCTGAA  | miRNA | miR-185 |
| t0033532 | 23 | 3 TGGAGAGAAAGGCAGTTCCTGAG  | miRNA | miR-185 |
| t0033543 | 20 | 3 TGGAGAGGAAGGCAGTTCCT     | miRNA | miR-185 |
| t0033562 | 23 | 3 TGGAGCGAAAGGCAGTTCCTGAG  | miRNA | miR-185 |
| t0033609 | 22 | 3 TGGAGAGAAAGGCAGTTCCTGT   | miRNA | miR-185 |
| t0033617 | 23 | 3 TGGAGAGCAAGGCAGTTCCTGAG  | miRNA | miR-185 |
| t0033722 | 22 | 3 TGGAGAGGAAGGAAGTTCCTGA   | miRNA | miR-185 |
| t0033758 | 20 | 3 AGGAGAGAAAGGCAGTTCCT     | miRNA | miR-185 |
| t0033837 | 23 | 3 TGGCGAGAAAGGCAGTTCCTGAT  | miRNA | miR-185 |
| t0033848 | 22 | 3 TGGAGAGAAAGGGAGTTCCTGT   | miRNA | miR-185 |
| t0033903 | 23 | 3 TGGAGAGAACGGCAGTTCCTGAG  | miRNA | miR-185 |
| t0033920 | 23 | 3 TGGAGAGAGAGGCAGTTCCTGAG  | miRNA | miR-185 |
| t0033994 | 19 | 3 TGGAGAAAGGCAGTTCCTG      | miRNA | miR-185 |
| t0034016 | 21 | 3 TGGAGAGAAAGGAAGTTCCTT    | miRNA | miR-185 |
| t0034052 | 23 | 3 TGGAGAGAAGGGCAGTTCCTGAG  | miRNA | miR-185 |
| t0034070 | 21 | 3 GGGAGAGAAAGGCAGTTCCTG    | miRNA | miR-185 |
| t0034088 | 23 | 3 TGGAGCGAAAGGCAGTTCCTGAT  | miRNA | miR-185 |
| t0034105 | 24 | 3 TGGAGAGAAAGGCAGTTCCTGCAA | miRNA | miR-185 |
| t0034188 | 23 | 3 TCGAGAGAAAGGCAGTTCCTGAT  | miRNA | miR-185 |
| t0034268 | 23 | 3 TGGAGAGAAAGGCAGTTCCTGAA  | miRNA | miR-185 |
| t0034350 | 24 | 3 TGGAGAGAAAGGCAGTTCCTTAAA | miRNA | miR-185 |
| t0034367 | 23 | 3 TGGAGAGAAACGCAGTTCCTGAT  | miRNA | miR-185 |
| t0034372 | 23 | 3 TGGAGAGAAAGACAGTTCCTGAT  | miRNA | miR-185 |
| t0034380 | 20 | 3 TGGAGAGAAAGGCAGGTCCT     | miRNA | miR-185 |
| t0034395 | 23 | 3 TAGAGAGAAAGGCAGTTCCTGAG  | miRNA | miR-185 |
| t0034399 | 22 | 3 CGGAGAGAAAGGCAGTTCCTGT   | miRNA | miR-185 |
| t0034455 | 23 | 3 TGGAGAGAACGGCAGTTCCTGAT  | miRNA | miR-185 |
| t0034514 | 22 | 3 TGGAGAGAAAGGCAGTTCCTGC   | miRNA | miR-185 |
| t0034534 | 23 | 3 TGGAGTGAAGGCAGTTCCTGAG   | miRNA | miR-185 |
| t0034584 | 20 | 3 TGGAGAGAAAGGCAGATCCT     | miRNA | miR-185 |
| t0034588 | 23 | 3 TGGAGAGAAAGCCAGTTCCTGAT  | miRNA | miR-185 |

|          |    |                                 |       |           |
|----------|----|---------------------------------|-------|-----------|
| t0034703 | 22 | 3 TGGAGAGAAAGGCAGTTCATTA        | miRNA | miR-185   |
| t0034732 | 24 | 3 TGGACGGAGAACTGATAAGGGCTC      | miRNA | miR-184   |
| t0034738 | 22 | 3 AAGGTAGATAGAATAGGTCTTG        | miRNA | miR-1839  |
| t0034746 | 21 | 3 AGGTAGATAGAACAGGTATTG         | miRNA | miR-1839  |
| t0034844 | 21 | 3 AGGTAGATAGAAAAGGTCTTG         | miRNA | miR-1839  |
| t0034866 | 22 | 3 AGGTAGATAGAACAGGGCTTGT        | miRNA | miR-1839  |
| t0034978 | 21 | 3 AGGTGGATAGAACAGGTCTTG         | miRNA | miR-1839  |
| t0035016 | 22 | 3 AGGTAGATAGAACAGGGCTTGA        | miRNA | miR-1839  |
| t0035054 | 20 | 3 TGAGGCAGTAGATTGTAGTT          | miRNA | miR-1827  |
| t0035066 | 21 | 3 GAGGGAGTAGGTTGTATAGTT         | miRNA | miR-1827  |
| t0035074 | 22 | 3 TGAGGGAGTAGATTGTATCGTT        | miRNA | miR-1827  |
| t0035087 | 22 | 3 TGAGGCAGTAGATTGTATAGTG        | miRNA | miR-1827  |
| t0035156 | 22 | 3 CGAGGGAGTAGATTGTATAGTT        | miRNA | miR-1827  |
| t0035181 | 22 | 3 TGGGGGAGTAGATTGTATAGTT        | miRNA | miR-1827  |
| t0035101 | 21 | 3 TGAGGGAGGAGGTTGTATAGT         | miRNA | miR-1827  |
| t0033012 | 20 | 3 TGAGGCAGTAGATTGTATTT          | miRNA | miR-1827  |
| t0033264 | 22 | 3 TGAGGGCGTAGATTGTATAGTT        | miRNA | miR-1827  |
| t0033324 | 22 | 3 TGAGGGAGTGGATTGTATAGTT        | miRNA | miR-1827  |
| t0033560 | 20 | 3 TGAGGGAGTAGATTGTATAC          | miRNA | miR-1827  |
| t0034090 | 21 | 3 TGAGGGATTAGATTGTATAGT         | miRNA | miR-1827  |
| t0034103 | 21 | 3 TGAGGCAGTAGATTGTATAGG         | miRNA | miR-1827  |
| t0033168 | 22 | 3 TTAGGGAGTAGATTGTATAGTT        | miRNA | miR-1827  |
| t0033458 | 22 | 3 TGAGGGAGTAGATTGTATGGTT        | miRNA | miR-1827  |
| t0033674 | 23 | 3 TGAGGAAGTAGATTGTATAGTAA       | miRNA | miR-1827  |
| t0033891 | 22 | 3 TGCGGGAGTAGATTGTATAGTT        | miRNA | miR-1827  |
| t0033906 | 22 | 3 TGAGGGAGTAGATTGTGTGGTT        | miRNA | miR-1827  |
| t0034061 | 22 | 3 TGAGGGAGAAGATTGTATAGTT        | miRNA | miR-1827  |
| t0034086 | 20 | 3 TGAGGAAGTAGATTGTAGTT          | miRNA | miR-1827  |
| t0034225 | 20 | 3 TGAGGGAGTAGATTGTAGAG          | miRNA | miR-1827  |
| t0034315 | 41 | 3 TTTGGCAATGGTAGAACTCACAAACAATC | miRNA | miR-182   |
| t0034322 | 22 | 3 TTTGGCAATGGTAGAACTCAA         | miRNA | miR-182   |
| t0034386 | 24 | 3 AACATTCATTGCTGTCCGGTGGGGT     | miRNA | miR-181b  |
| t0034404 | 26 | 3 AACATTCATTGCTGTCCGGTGGGGATC   | miRNA | miR-181b  |
| t0034410 | 20 | 3 TCGGGGCGGCCGGCGCGGTC          | miRNA | miR-1777a |
| t0034559 | 22 | 3 ACTGCAGTGAAGGCACTTGTCTG       | miRNA | miR-17-3p |
| t0034567 | 24 | 3 CAAAGTGCTTACAGTGCCGGTAGA      | miRNA | miR-17    |
| t0034569 | 21 | 3 CAAAGTGCTTACACTGCAGGT         | miRNA | miR-17    |
| t0034772 | 22 | 3 CAAAGTGCTTACAGTGCAGGGA        | miRNA | miR-17    |
| t0035000 | 22 | 3 AAAGTGCTTACAGTGCAGGAAG        | miRNA | miR-17    |
| t0035064 | 21 | 3 CAAAGTGCTTACAGTGCAGGG         | miRNA | miR-17    |
| t0035107 | 22 | 3 CAAAGTGCTTACAGTGCAGGAA        | miRNA | miR-17    |
| t0035162 | 24 | 3 CAAAGTGCTTACAGTGCAGGGAGA      | miRNA | miR-17    |
| t0033294 | 21 | 3 TAGAGCACGTAAATATTGGCG         | miRNA | miR-16c   |
| t0034711 | 21 | 3 AGCAGCACGTAAATATTGGCT         | miRNA | miR-16b   |
| t0033398 | 22 | 3 TAGCAGCACGTAAATATAGGCA        | miRNA | miR-16b   |
| t0033987 | 22 | 3 TAGCAGCGCGTAAATATTGGCA        | miRNA | miR-16b   |
| t0033760 | 22 | 3 TAGAAGCACGTAAATATTGGCA        | miRNA | miR-16b   |
| t0034427 | 22 | 3 TAGCAGAACGTAAATATTGGCA        | miRNA | miR-16b   |
| t0033053 | 22 | 3 TAGCAGCACGTAAATATTGTCA        | miRNA | miR-16b   |
| t0033157 | 27 | 3 GCGGGGAGCGGTCCGGCGGCGCGGG     | miRNA | miR-1607  |
| t0033637 | 21 | 3 AGCAGCACGTAAATATTGGTG         | miRNA | miR-16    |
| t0033782 | 24 | 3 TAGAAGCACGTAAATATTGGCGAA      | miRNA | miR-16    |
| t0033886 | 23 | 3 TAGCAACACGTAAATATTGGCGA       | miRNA | miR-16    |
| t0034859 | 22 | 3 TAGCAGCATGTAAATATTGGAG        | miRNA | miR-16    |
| t0034987 | 22 | 3 TAGCAGCACGTAAATGTTGTCG        | miRNA | miR-16    |
| t0034293 | 21 | 3 TAGCAGCACGTAAATATTGAG         | miRNA | miR-16    |
| t0033061 | 23 | 3 TGGCAGCACGTAAATATTGGCGA       | miRNA | miR-16    |
| t0033632 | 22 | 3 TAGCAGAAAGTAAATATTGGCG        | miRNA | miR-16    |

|          |    |                            |       |             |
|----------|----|----------------------------|-------|-------------|
| t0034323 | 22 | 3 TAGCAGCACGGAAATATTGGTG   | miRNA | miR-16      |
| t0034328 | 22 | 3 TAGCAGCGTGTAAATATTGGCG   | miRNA | miR-16      |
| t0034684 | 22 | 3 TGGCAGCACGTAATATTGCCG    | miRNA | miR-16      |
| t0034894 | 21 | 3 TAGCAGCACTTAAATATTGGC    | miRNA | miR-16      |
| t0033105 | 23 | 3 TAGCAGCACGTAATAATGGCGA   | miRNA | miR-16      |
| t0033114 | 22 | 3 TAGCAGCATGCAAATATTGGCG   | miRNA | miR-16      |
| t0033257 | 23 | 3 ATAGCAGCACGTAATATTGGGG   | miRNA | miR-16      |
| t0033309 | 20 | 3 TAGCAGCACGTAATTATTGG     | miRNA | miR-16      |
| t0033335 | 22 | 3 TAGCAGCATGTAATATTGGTG    | miRNA | miR-16      |
| t0033393 | 20 | 3 TAGCAGCAGGTAATATTGG      | miRNA | miR-16      |
| t0033447 | 23 | 3 TAGCAGTACGTAATATTGGCGA   | miRNA | miR-16      |
| t0033480 | 22 | 3 TAGCAGGACGTAATATTGGAG    | miRNA | miR-16      |
| t0033508 | 23 | 3 TAGCAGGACGTAATATTGGCGA   | miRNA | miR-16      |
| t0033539 | 23 | 3 TAGCAGCACGCAAATATTGGCGT  | miRNA | miR-16      |
| t0033595 | 23 | 3 TAGTAGCACGTAATATTGGCGT   | miRNA | miR-16      |
| t0033802 | 22 | 3 TAGCAGCACGTAATAATTGGAG   | miRNA | miR-16      |
| t0033890 | 22 | 3 TAGCAGCACGCAAATATTGTCG   | miRNA | miR-16      |
| t0033950 | 22 | 3 TAGCAGCACGTAATATTGCAG    | miRNA | miR-16      |
| t0033996 | 22 | 3 AAGAAGCACGTAATATTGGCG    | miRNA | miR-16      |
| t0034013 | 22 | 3 TAGCAGCACGCAAATATTGCCG   | miRNA | miR-16      |
| t0034019 | 21 | 3 TAGAAGCACGTAATATTGGC     | miRNA | miR-16      |
| t0034032 | 20 | 3 TAGCAGCACGTAATTTTGG      | miRNA | miR-16      |
| t0034063 | 20 | 3 TAGCAGAACATCATGGTTTT     | miRNA | miR-15c     |
| t0034074 | 19 | 3 TAGCAGAACATCATGGGTT      | miRNA | miR-15b     |
| t0034153 | 20 | 3 TAGCAGAACATCATGGGTTA     | miRNA | miR-15b     |
| t0034229 | 20 | 3 TAGAAGAACATCATGGTTTA     | miRNA | miR-15b     |
| t0034260 | 20 | 3 TAGCAGCACATCATTGTTTA     | miRNA | miR-15b     |
| t0034391 | 19 | 3 TAGCAGAATATCATGGTTT      | miRNA | miR-15b     |
| t0034447 | 19 | 3 TAGCAGCACATCATGGGTA      | miRNA | miR-15b     |
| t0034671 | 19 | 3 TAGCACCACATCATGGTTT      | miRNA | miR-15b     |
| t0034728 | 19 | 3 TACCAGCACATCATGGTTT      | miRNA | miR-15b     |
| t0034734 | 21 | 3 TAGCCGCACATCATGGTTTAC    | miRNA | miR-15b     |
| t0034755 | 20 | 3 TAGCAGCACATCATGATTTA     | miRNA | miR-15b     |
| t0034989 | 19 | 3 TAGAAGAACATCATGGTTT      | miRNA | miR-15b     |
| t0035047 | 21 | 3 TAGCAGCACATAATGGTTTAT    | miRNA | miR-15b     |
| t0033175 | 21 | 3 TAGCAGCACATCATGATTTAC    | miRNA | miR-15b     |
| t0033068 | 19 | 3 TCGCAGCACATCATGGTTT      | miRNA | miR-15b     |
| t0033187 | 21 | 3 TAGCAGCACATCACGGTTTAC    | miRNA | miR-15b     |
| t0033298 | 19 | 3 TAGAAGCACATAATGGTTT      | miRNA | miR-15a     |
| t0033349 | 18 | 3 TAGCAGAACATAATGGTT       | miRNA | miR-15a     |
| t0033491 | 19 | 3 TAGTAGCACATAATGGTTT      | miRNA | miR-15a     |
| t0033650 | 21 | 3 TACCAGCACATAATGGTTTGT    | miRNA | miR-15a     |
| t0033661 | 20 | 3 TAGCAGCACATAATGGGTTT     | miRNA | miR-15a     |
| t0033810 | 20 | 3 TAGCAGCACATAATCGTTTG     | miRNA | miR-15a     |
| t0033913 | 21 | 3 TAGCAGCACATGATGGTTTGT    | miRNA | miR-15a     |
| t0034294 | 20 | 3 TAGCAGCACAAAATGGTTTG     | miRNA | miR-15a     |
| t0034489 | 19 | 3 TAGCAGCACATAATGGTCT      | miRNA | miR-15a     |
| t0034812 | 21 | 3 TAGCAGCACAGAATGGTTTGT    | miRNA | miR-15a     |
| t0034819 | 21 | 3 TAGCAGCACATAATGATTTGT    | miRNA | miR-15a     |
| t0035062 | 22 | 3 TAGCAGCACATAATAGTTTGTG   | miRNA | miR-15a     |
| t0035178 | 19 | 3 TAGCAGCAAATAATGGTTT      | miRNA | miR-15a     |
| t0033202 | 24 | 3 TAGCAGCACATAATGGTTTGGGGA | miRNA | miR-15a     |
| t0033220 | 21 | 3 TAGCAGCACATTATGGTTTGT    | miRNA | miR-15a     |
| t0033330 | 22 | 3 AAGCAGCACATAATGGTTTGTG   | miRNA | miR-15a     |
| t0033445 | 22 | 3 TAGCAGCACATAACGGTTTGTG   | miRNA | miR-15a     |
| t0033545 | 20 | 3 GGGCTCGGGCTGGGCGAGGC     | miRNA | miR-1587    |
| t0033737 | 21 | 3 TCAGTGCAATACAGAACTTTG    | miRNA | miR-152b    |
| t0033769 | 21 | 3 TCAGTGCAATACAGAACTTTG    | miRNA | miR-148b-3p |

|          |    |                            |       |             |
|----------|----|----------------------------|-------|-------------|
| t0033948 | 21 | 3 TCAGTGCATCACAGAACCTTG    | miRNA | miR-148b-3p |
| t0033963 | 21 | 3 TCAGGGCACTACAGAACTTTG    | miRNA | miR-148a    |
| t0033997 | 21 | 3 TCAGTGCCTAAAGAACTTTG     | miRNA | miR-148a    |
| t0034247 | 23 | 3 AGATATCATCATATACTGTAAGT  | miRNA | miR-144*    |
| t0034429 | 21 | 3 GGATATCATCATATACTGTAC    | miRNA | miR-144*    |
| t0034511 | 21 | 3 GGATATAATCATATACTGTAA    | miRNA | miR-144*    |
| t0034655 | 19 | 3 CTACAGTATAGATGATGCA      | miRNA | miR-144     |
| t0034868 | 18 | 3 TACAGTATAGCTGATGTA       | miRNA | miR-144     |
| t0034902 | 20 | 3 TACAGTATAGGTGATGTACT     | miRNA | miR-144     |
| t0035008 | 19 | 3 CTACAGTATGGATGATGTA      | miRNA | miR-144     |
| t0033069 | 21 | 3 TACAGTATAGATGATGTCCTT    | miRNA | miR-144     |
| t0034336 | 23 | 3 AGAGATGAAGCACTGTAGCTATC  | miRNA | miR-143     |
| t0033268 | 23 | 3 TGAGATGAAGCACTGAAGCTATC  | miRNA | miR-143     |
| t0033565 | 21 | 3 CTCATAAAGTAGAAAGCACTA    | miRNA | miR-142-5p  |
| t0034359 | 20 | 3 CACATAAAGTAGAAAGCACT     | miRNA | miR-142-5p  |
| t0034487 | 20 | 3 CCCATACAGTAGAAAGCACT     | miRNA | miR-142     |
| t0033834 | 20 | 3 CCCATAAAGTAGAGAGCACT     | miRNA | miR-142     |
| t0034577 | 20 | 3 CCCATAAAGTGGAAGCACT      | miRNA | miR-142     |
| t0035007 | 20 | 3 CCCATAAAGTAGAAAGTACT     | miRNA | miR-142     |
| t0033086 | 21 | 3 CCCATAAAGTAGAAAGCACTC    | miRNA | miR-142     |
| t0033731 | 20 | 3 CCCGTAAAGTAGAAAGCACT     | miRNA | miR-142     |
| t0034743 | 22 | 3 TACCACAGGGGAGAACAACGGA   | miRNA | miR-140     |
| t0034761 | 22 | 3 TACAACAGGGTAGAACAACGGA   | miRNA | miR-140     |
| t0034852 | 22 | 3 TACCACAGGGTAGAACTACAGA   | miRNA | miR-140     |
| t0033575 | 20 | 3 CCACAGGGTAGAACCAAGGA     | miRNA | miR-140     |
| t0034942 | 23 | 3 TACCACAGGGTAGAACCACCGAT  | miRNA | miR-140     |
| t0033516 | 24 | 3 TACCACAGGGTAGAGCCACGGACG | miRNA | miR-140     |
| t0034218 | 24 | 3 TACCCTGGGTAGAACCACGGACA  | miRNA | miR-140     |
| t0033059 | 24 | 3 TACCACGGGTAGAACCACGGACG  | miRNA | miR-140     |
| t0033485 | 22 | 3 CCCACAGGGTAGAACCACGGAC   | miRNA | miR-140     |
| t0034059 | 24 | 3 TACCACAGGGTTGAACCACGGACA | miRNA | miR-140     |
| t0034321 | 23 | 3 AACCACAGGGTAGAACCACGGAT  | miRNA | miR-140     |
| t0034495 | 24 | 3 TACCACAGGGGAGAACCACGGACT | miRNA | miR-140     |
| t0034601 | 22 | 3 ACCACAGGGTAGAACCACGAAA   | miRNA | miR-140     |
| t0033025 | 24 | 3 TACCAAAGGGTAGAACCACGGACA | miRNA | miR-140     |
| t0033049 | 22 | 3 ACCACAGGGTGAACCACGGAA    | miRNA | miR-140     |
| t0033064 | 23 | 3 TACCACAGGGTAGATCCACGGAC  | miRNA | miR-140     |
| t0033079 | 23 | 3 TACCCTGGGTAGAACCACGGAC   | miRNA | miR-140     |
| t0033091 | 23 | 3 TACCTCAGGGTAGAACCACGGAT  | miRNA | miR-140     |
| t0033097 | 23 | 3 ACCACAGGATAGAACCACGGACA  | miRNA | miR-140     |
| t0033104 | 23 | 3 ACAACAGGGTAGAACCACGGACT  | miRNA | miR-140     |
| t0033127 | 22 | 3 ACTACAGGGTAGAACCACGGAT   | miRNA | miR-140     |
| t0033129 | 23 | 3 TACCACAGGGTACAACCACGGAC  | miRNA | miR-140     |
| t0033131 | 23 | 3 ACCACAGGGTAGAACCACGGGCT  | miRNA | miR-140     |
| t0033185 | 22 | 3 ACCACAGGGTAGGACCACGGAC   | miRNA | miR-140     |
| t0033194 | 23 | 3 ACCACAGGGTAGAACCACGGCTT  | miRNA | miR-140     |
| t0033214 | 22 | 3 ACCACACGGTAGAACCACGGAC   | miRNA | miR-140     |
| t0033238 | 23 | 3 TACCACAGGGTTGAACCACGGAC  | miRNA | miR-140     |
| t0033284 | 21 | 3 ACCACAGGGTAGAAATACGGA    | miRNA | miR-140     |
| t0033293 | 23 | 3 AACACAGGGTAGAACCACGGACA  | miRNA | miR-140     |
| t0033325 | 20 | 3 CCACAGGGTAGAAACACGGA     | miRNA | miR-140     |
| t0033328 | 20 | 3 ACCGCAGGGTAGAACCACGG     | miRNA | miR-140     |
| t0033331 | 23 | 3 TACCACAGGGTAGAAACACGGAG  | miRNA | miR-140     |
| t0033342 | 23 | 3 TACCACAGGGCAGAACCACGGAG  | miRNA | miR-140     |
| t0033347 | 22 | 3 TACCACAGGGTAGATCCACGGA   | miRNA | miR-140     |
| t0033358 | 23 | 3 TACCACAGGGTAGAACCCCGGCT  | miRNA | miR-140     |
| t0033367 | 22 | 3 ACCCCAGGGTAGAACCACGGAA   | miRNA | miR-140     |
| t0033378 | 21 | 3 ACCACAGGGTAGAACTCCGGA    | miRNA | miR-140     |

|          |    |                             |       |         |
|----------|----|-----------------------------|-------|---------|
| t0033380 | 23 | 3 ACAACAGGGTAGAACCACGGACG   | miRNA | miR-140 |
| t0033384 | 22 | 3 TACCACAGGGTAGAAAAACGGA    | miRNA | miR-140 |
| t0033385 | 22 | 3 AACACAGGGTAGAACCACGGAT    | miRNA | miR-140 |
| t0033396 | 21 | 3 ACCACAGTGTAGAACCACGGC     | miRNA | miR-140 |
| t0033402 | 24 | 3 TACTACAGGGTAGAACCACGGACG  | miRNA | miR-140 |
| t0033446 | 24 | 3 TACCACAGGGTAGAACCACGCACA  | miRNA | miR-140 |
| t0033461 | 24 | 3 TACCACAGGGTAGAACCACTGACA  | miRNA | miR-140 |
| t0033564 | 24 | 3 CACCACAGGGTAGAACCACGGACG  | miRNA | miR-140 |
| t0033629 | 23 | 3 TACCACAGGGTAGAACACCGGAC   | miRNA | miR-140 |
| t0033667 | 24 | 3 TACCACAGGGTAGAACCACGGAGG  | miRNA | miR-140 |
| t0033678 | 22 | 3 ACCACAGGGTAGAACCTCGGAT    | miRNA | miR-140 |
| t0033695 | 21 | 3 AACACAGGGTAGAAACACGGA     | miRNA | miR-140 |
| t0033709 | 22 | 3 ACCCCAGGGTAGAACCACGGAC    | miRNA | miR-140 |
| t0033712 | 21 | 3 TACCACAGGGAAGAACCACGG     | miRNA | miR-140 |
| t0033735 | 23 | 3 TACCACAGGGTAGAACCCAGGAC   | miRNA | miR-140 |
| t0033869 | 21 | 3 ACCACAGGGTAGAACCAACGGT    | miRNA | miR-140 |
| t0033889 | 21 | 3 TACCACAGGGTAGAGCCACGG     | miRNA | miR-140 |
| t0033892 | 23 | 3 TGCCACAGGGTAGAACCACGGAT   | miRNA | miR-140 |
| t0033904 | 22 | 3 ACCACAGGGTAGAACCAAGGAG    | miRNA | miR-140 |
| t0033921 | 22 | 3 TACCACAGTGTAGAACCACGGC    | miRNA | miR-140 |
| t0033938 | 23 | 3 TACCACAGGGAAGAACCACGGAG   | miRNA | miR-140 |
| t0033984 | 22 | 3 TACCACAGGGAAGAACAACGGA    | miRNA | miR-140 |
| t0033991 | 23 | 3 ACCCCAGGGTAGAACCACGGACG   | miRNA | miR-140 |
| t0034014 | 22 | 3 ACCACAGCGTAGAACCACGGAT    | miRNA | miR-140 |
| t0034015 | 23 | 3 TACCACAGGGTAGAACCACCGCC   | miRNA | miR-140 |
| t0034037 | 24 | 3 TACCACAGGGTACAACCACGGACA  | miRNA | miR-140 |
| t0034043 | 22 | 3 ACCACAGGGTAGAACCTCGGAC    | miRNA | miR-140 |
| t0034064 | 24 | 3 TACCACAGGGTAGAACCAAGGCCA  | miRNA | miR-140 |
| t0034065 | 21 | 3 TACCACAGGGTAGAACCATGG     | miRNA | miR-140 |
| t0034130 | 22 | 3 ACCACAAGGTAGAACCACGGAT    | miRNA | miR-140 |
| t0034162 | 21 | 3 ACCACAGGGGAGAACCACGGT     | miRNA | miR-140 |
| t0034169 | 22 | 3 TAACACAGGGTAGAACAAACGGA   | miRNA | miR-140 |
| t0034194 | 23 | 3 ACCACAGGGTAGAACAAAGGACA   | miRNA | miR-140 |
| t0034248 | 23 | 3 TACCACAGGGTAGAACCACGACA   | miRNA | miR-140 |
| t0034256 | 22 | 3 ACCTCAGGGTAGAACCACGGAC    | miRNA | miR-140 |
| t0034264 | 22 | 3 ACCACAGGGTAGAAAAACGGAC    | miRNA | miR-140 |
| t0034275 | 23 | 3 AACACAGGGTAGAACCACGGACT   | miRNA | miR-140 |
| t0034345 | 22 | 3 TACCACAGGGTAGAATCACGGC    | miRNA | miR-140 |
| t0034412 | 24 | 3 TACCACAGGGTAGAACCACCGACG  | miRNA | miR-140 |
| t0034422 | 23 | 3 ACCACAGGGTAGAACCACGGTCA   | miRNA | miR-140 |
| t0034512 | 23 | 3 TACCCAGGGTAGAACCACGGAT    | miRNA | miR-140 |
| t0034535 | 23 | 3 TACCACAGGGTAGAACCACGCAA   | miRNA | miR-140 |
| t0034545 | 21 | 3 ACCACAGGGGAGAACCACGGC     | miRNA | miR-140 |
| t0034548 | 22 | 3 TACAACAGGGTAGAACCAAGGA    | miRNA | miR-140 |
| t0034549 | 23 | 3 TACCACAGGGTAGAACCATGGAG   | miRNA | miR-140 |
| t0034560 | 23 | 3 TACCACAGGGTAGAGCCACGGAT   | miRNA | miR-140 |
| t0034581 | 22 | 3 TACCATAGGGTAGAATCACGGA    | miRNA | miR-140 |
| t0034600 | 21 | 3 CACCACAGGGTAGAACCACGG     | miRNA | miR-140 |
| t0034635 | 24 | 3 TACCACAGGGTAGAACAAACGGATA | miRNA | miR-140 |
| t0034644 | 22 | 3 ACCACACGGTAGAACCACGGAA    | miRNA | miR-140 |
| t0034665 | 21 | 3 ACCACAGGGTAGTACCACGGA     | miRNA | miR-140 |
| t0034681 | 23 | 3 TACCACAGGGTAGAAGCACGGAT   | miRNA | miR-140 |
| t0034701 | 22 | 3 CACCACAGGGTAGAACCCCGGA    | miRNA | miR-140 |
| t0034712 | 22 | 3 ACCACAGGGTAGAACAAAGGAC    | miRNA | miR-140 |
| t0034715 | 22 | 3 ACCACAGGCTAGAACCACGGAA    | miRNA | miR-140 |
| t0034756 | 23 | 3 TACCACAGGGTAGCACCACGGAT   | miRNA | miR-140 |
| t0034762 | 23 | 3 TACCACAGGGTACAACCACGGAT   | miRNA | miR-140 |
| t0034764 | 23 | 3 ACCAAAGGGTAGAACCACGGACA   | miRNA | miR-140 |

|          |    |                              |       |            |
|----------|----|------------------------------|-------|------------|
| t0034765 | 22 | 3 ACCACAGTGTAGAACCACGGAC     | miRNA | miR-140    |
| t0034770 | 26 | 3 ACCACAGGGTAGAACCACGGAAGAGA | miRNA | miR-140    |
| t0034786 | 21 | 3 TACAACAGGGTAGAACCACGG      | miRNA | miR-140    |
| t0034801 | 21 | 3 TGCCACAGGGTAGAACCACGG      | miRNA | miR-140    |
| t0034856 | 23 | 3 ACCACAGGGTAGAACCAAGGACG    | miRNA | miR-140    |
| t0034858 | 23 | 3 TAACACAGGGTAGAACAACGGAC    | miRNA | miR-140    |
| t0034874 | 22 | 3 TACCACAGGGGAGAACCCCGGA     | miRNA | miR-140    |
| t0034876 | 22 | 3 CCCACAGGGTAGAACCACGGAT     | miRNA | miR-140    |
| t0034927 | 23 | 3 TACACAGGGTAGAACCACGGACA    | miRNA | miR-140    |
| t0034935 | 23 | 3 TACCACTGGGTAGAACCACGGAA    | miRNA | miR-140    |
| t0034967 | 23 | 3 ACCACAGGGTAGAAACACGGACT    | miRNA | miR-140    |
| t0034970 | 22 | 3 ACCACAGGGTAGGACCACGGAT     | miRNA | miR-140    |
| t0034975 | 21 | 3 CAGTGCAATGTAAAAGGGAA       | miRNA | miR-130a   |
| t0034980 | 20 | 3 ACTCGGCGTGCCGTCGGTAG       | miRNA | miR-1307   |
| t0035025 | 24 | 3 TCTGGGCAACAAAGTGAGAACTGA   | miRNA | miR-1285   |
| t0035038 | 24 | 3 TCGGATCCGCTGAGCTTGGGATC    | miRNA | miR-127    |
| t0035051 | 21 | 3 TAAGGCACGCGGTGAATGTCA      | miRNA | miR-124-3p |
| t0035055 | 20 | 3 GTGAGGACTTGGGAGGGGGA       | miRNA | miR-1224   |
| t0035078 | 22 | 3 GTGAGGACTCGGGAGGGGGA       | miRNA | miR-1224   |
| t0035132 | 22 | 3 AGCAGCATTATACAGGGCTATT     | miRNA | miR-107    |
| t0035134 | 22 | 3 AGCAGCATTGTAAAGGGCTATT     | miRNA | miR-107    |
| t0035136 | 22 | 3 AGCAGCATTGCACAGGGCTATA     | miRNA | miR-107    |
| t0035140 | 22 | 3 AGCAGAATTGTACAGGGCTATT     | miRNA | miR-107    |
| t0035146 | 22 | 3 AGCAACATTGTACAGGGCTATT     | miRNA | miR-107    |
| t0035160 | 22 | 3 AGCAGCACTGTACAGGGCTATT     | miRNA | miR-107    |
| t0033172 | 20 | 3 CCGCACTGTGGGTACTTGAT       | miRNA | miR-106b*  |
| t0033993 | 22 | 3 CCGCACTGTGGGTAATTGCTGA     | miRNA | miR-106b*  |
| t0034485 | 21 | 3 ACCGCACTGTGGGGACTTGCT      | miRNA | miR-106b*  |
| t0034699 | 20 | 3 CCACACTGTGGGTACTTGCT       | miRNA | miR-106b*  |
| t0033179 | 22 | 3 TACCGCACTGTGGGAACTTGCT     | miRNA | miR-106b*  |
| t0033139 | 21 | 3 TAAAGCGCTGACAGTGCAGAT      | miRNA | miR-106b   |
| t0034593 | 20 | 3 TAAAGAGCTGACAGTGCAGA       | miRNA | miR-106b   |
| t0033281 | 20 | 3 TAAAGTCTGACAGTGCAGGA       | miRNA | miR-106b   |
| t0033442 | 22 | 3 TAAAGTCTGACAGTGCAGATC      | miRNA | miR-106b   |
| t0033611 | 21 | 3 TAAAGTCTGACAGAGCAGAT       | miRNA | miR-106b   |
| t0033771 | 21 | 3 AAAAGTCTGACAGTGCAGAT       | miRNA | miR-106b   |
| t0033868 | 21 | 3 TGAAGTCTGACAGTGCAGAT       | miRNA | miR-106b   |
| t0033946 | 20 | 3 TAAAGTCTGACCGTGCAGA        | miRNA | miR-106b   |
| t0033270 | 21 | 3 TAAAGTCTGACAGTGAAGAA       | miRNA | miR-106b   |
| t0033315 | 20 | 3 TAAAGTGATGACAGTGCAGA       | miRNA | miR-106b   |
| t0033680 | 21 | 3 AAAAGTGCTTACAGTGCCGGT      | miRNA | miR-106    |
| t0033768 | 22 | 3 AAAAGTGCTTACAGTGCAGGGA     | miRNA | miR-106    |
| t0034769 | 23 | 3 AAAAGTGCTTACAGTGCAGGTCTG   | miRNA | miR-106    |
| t0033083 | 22 | 3 AAAAGTGCTTACAGTACAGGTA     | miRNA | miR-106    |
| t0033169 | 21 | 3 AAAAGGGCTTACAGTGCAGGT      | miRNA | miR-106    |
| t0033285 | 21 | 3 AAAAGTGCTTACAGTGCAGGG      | miRNA | miR-106    |
| t0033503 | 21 | 3 AAAAGCGCTTACAGTGCAGGT      | miRNA | miR-106    |
| t0033690 | 21 | 3 AGCAGCATTGTACAGGACTAA      | miRNA | miR-103a   |
| t0033728 | 23 | 3 AGCAGCATTGTAAAGGGCTATGT    | miRNA | miR-103a   |
| t0033937 | 20 | 3 AGCAGCATTGTACAGTGCTA       | miRNA | miR-103a   |
| t0034759 | 20 | 3 AGCAGCATTGTACAGGGCCA       | miRNA | miR-103a   |
| t0034929 | 23 | 3 AGCTGCATTGTACAGGGCTATGA    | miRNA | miR-103a   |
| t0034981 | 26 | 3 AGCAGCATTGTACAGGACTATGAATC | miRNA | miR-103a   |
| t0033227 | 22 | 3 AGCAGCATAGTACAGGGCTATG     | miRNA | miR-103a   |
| t0033598 | 23 | 3 AGCAGCATGGTACAGGGCTATGA    | miRNA | miR-103a   |
| t0033790 | 22 | 3 AGCAGCATGGTACAGGGCTATG     | miRNA | miR-103a   |
| t0034299 | 23 | 3 AGCAGCATTATACAGGGCTATGT    | miRNA | miR-103a   |
| t0034687 | 22 | 3 AGCTGCATTGTACAGGGCTATG     | miRNA | miR-103a   |



|          |    |                              |       |           |
|----------|----|------------------------------|-------|-----------|
| t0034731 | 23 | 3 AGCAGCATTGCACAGGGCTATGT    | miRNA | miR-103a  |
| t0035174 | 20 | 3 AGCAGCATTCTACAGGGCTA       | miRNA | miR-103a  |
| t0033153 | 23 | 3 AGCAGCATTGTACAGGGCTAGGA    | miRNA | miR-103a  |
| t0033155 | 23 | 3 AGCAGCAGTGTACAGGGCTATGA    | miRNA | miR-103a  |
| t0033276 | 23 | 3 AGCAACATTGTACAGGGCTATGT    | miRNA | miR-103a  |
| t0033397 | 23 | 3 AGCATCATTGTACAGGGCTATGA    | miRNA | miR-103a  |
| t0033423 | 23 | 3 AGCAGAATTGTACAGGGCTATGT    | miRNA | miR-103a  |
| t0033452 | 21 | 3 AGCAGCAGTGTACAGGGCTAT      | miRNA | miR-103a  |
| t0033524 | 22 | 3 AGCAGCATTGTACAGGGCAATG     | miRNA | miR-103a  |
| t0033541 | 23 | 3 AGCAGCATTGTACAGCGCTATGA    | miRNA | miR-103a  |
| t0033656 | 22 | 3 GTACAGTACTGCGATAACTGAT     | miRNA | miR-101c  |
| t0033665 | 22 | 3 TACAGTACTGGGATAACTGACT     | miRNA | miR-101c  |
| t0034000 | 20 | 3 TACAGTACGGTGATAACTGA       | miRNA | miR-101   |
| t0034440 | 22 | 3 TACAGTGCTGTGATAACTGAAA     | miRNA | miR-101   |
| t0034454 | 21 | 3 GTACAGTACTGTGACAACCTGA     | miRNA | miR-101   |
| t0034566 | 21 | 3 GTACAGTATTGTGATAACTGA      | miRNA | miR-101   |
| t0034640 | 23 | 3 GTACAGTACTGTGATAAATGAAA    | miRNA | miR-101   |
| t0034673 | 21 | 3 TACAGTACGGTGATAACTGAA      | miRNA | miR-101   |
| t0034744 | 21 | 3 TACTGTACTGTGATAACTGAA      | miRNA | miR-101   |
| t0034913 | 22 | 3 TACAGTACTGTGATAACTAAAG     | miRNA | miR-101   |
| t0034994 | 20 | 3 TACAGGACTGTGATAACTGA       | miRNA | miR-101   |
| t0034995 | 20 | 3 TAGAGTACTGTGATAACTGA       | miRNA | miR-101   |
| t0035024 | 21 | 3 TACAGTAGTGTGATAACTGAA      | miRNA | miR-101   |
| t0033846 | 22 | 3 TACAGTACCGTGATAACTGAAA     | miRNA | miR-101   |
| t0034799 | 22 | 3 TACGGTACTGTGATAACTGAAG     | miRNA | miR-101   |
| t0033159 | 21 | 3 TACAGTACTGTGATACCTGAA      | miRNA | miR-101   |
| t0033310 | 20 | 3 TCCAGTACTGTGATAACTGA       | miRNA | miR-101   |
| t0033374 | 21 | 3 GTACAGTACTGTGATAGCTGA      | miRNA | miR-101   |
| t0033638 | 26 | 3 TACCCTGTAGATCCGAATTTGCGATC | miRNA | miR-10    |
| t0033646 | 21 | 3 TAAGGTAGTAGTTTGTGCTGT      | miRNA | let-7i    |
| t0033710 | 23 | 3 TGAGGTAGAAAGTTTGTGCTGTTT   | miRNA | let-7i    |
| t0033964 | 21 | 3 TGAGGTAGTAGTTTGTGATGT      | miRNA | let-7i    |
| t0034077 | 20 | 3 TGAGGTAGTGTTTGTGCTG        | miRNA | let-7i    |
| t0034119 | 19 | 3 TGAGGTAGGAGTTTGTGCT        | miRNA | let-7i    |
| t0034237 | 21 | 3 TGAGGTAGTAGTTTGTGCTGG      | miRNA | let-7i    |
| t0034572 | 20 | 3 TGAGGTAGTAGTTTGTGCTC       | miRNA | let-7i    |
| t0034636 | 23 | 3 TGAGGTAGTAGTTTGTGATGTTT    | miRNA | let-7i    |
| t0034670 | 23 | 3 TGAGGCAGTAGTTTGTGCTGTTT    | miRNA | let-7i    |
| t0034727 | 21 | 3 TGAGGTAGTAGTTTATGCTGT      | miRNA | let-7i    |
| t0034875 | 23 | 3 TGAGGGAGTAGTTTGTGCTGTTG    | miRNA | let-7i    |
| t0034955 | 22 | 3 TGAGGTAGTAGTTTGTCTGTT      | miRNA | let-7i    |
| t0034997 | 22 | 3 TGAGGTAGTAGTTTGTGCCGTT     | miRNA | let-7i    |
| t0033062 | 21 | 3 TGCGGTAGTAGTTTGTGCTGT      | miRNA | let-7i    |
| t0033133 | 20 | 3 TGAGGTAGTAGTTTGCCTG        | miRNA | let-7i    |
| t0033229 | 22 | 3 TGAGGGAGGAGTTTGTGCTGTT     | miRNA | let-7i    |
| t0033470 | 22 | 3 TGTGGTAGTAGTTTGTGCTGTT     | miRNA | let-7i    |
| t0033498 | 22 | 3 TGAGGTAGTGTTTGTGCTGTT      | miRNA | let-7i    |
| t0033640 | 21 | 3 TGAGGTACTAGTTTGTACAGT      | miRNA | let-7g    |
| t0033884 | 20 | 3 TGAGGTAGTAGTTTGTAAAG       | miRNA | let-7g    |
| t0033895 | 22 | 3 TGAGGTAGTAGTTAGTACAGTT     | miRNA | let-7g    |
| t0034101 | 22 | 3 TGAGGTAGTTGTTTGTACAGTT     | miRNA | let-7g    |
| t0034221 | 22 | 3 TGAGGTAGTACTTTGTACAGTT     | miRNA | let-7g    |
| t0034394 | 22 | 3 TGAGGTAGTAGTTTATACAGTA     | miRNA | let-7g    |
| t0034446 | 21 | 3 TGAGGTAGTAGTTCGTACAGT      | miRNA | let-7g    |
| t0034492 | 22 | 3 TGAGGTAGTAGTTTGTACAGGA     | miRNA | let-7g    |
| t0034570 | 21 | 3 TGAGGTAGAAAGTTTGTACAGT     | miRNA | let-7g    |
| t0034707 | 22 | 3 TGAGGTAGTGGATTGTATAGTA     | miRNA | let-7f-5p |
| t0035139 | 22 | 3 TGAGGTAGTAGATTGTATCGGT     | miRNA | let-7f-5p |

|          |    |                               |       |           |
|----------|----|-------------------------------|-------|-----------|
| t0035141 | 22 | 3 TGAGGTAGTTGATTGTATAGTA      | miRNA | let-7f-5p |
| t0035168 | 21 | 3 TGAGGTAGTAGATTGTACGTT       | miRNA | let-7f-5p |
| t0033418 | 22 | 3 TGAGGTGGTGGATTGTATAGTT      | miRNA | let-7f-5p |
| t0033530 | 22 | 3 TGAGGTAGTAGATTGTCTAGTA      | miRNA | let-7f    |
| t0033705 | 21 | 3 GAGGTAGTAGATTGTATATTT       | miRNA | let-7f    |
| t0034026 | 22 | 3 CGAGGTAGTAGATTGCATAGTT      | miRNA | let-7f    |
| t0034173 | 23 | 3 TGAGGTAGTAGATCGTATAGTTT     | miRNA | let-7f    |
| t0034192 | 22 | 3 TGCGGTAGTAGATTGTATAGAT      | miRNA | let-7f    |
| t0034383 | 22 | 3 GGAGGTAGTAGATTGTATAGGT      | miRNA | let-7f    |
| t0034387 | 22 | 3 TGAGGTCGTAGCTTGTATAGTT      | miRNA | let-7f    |
| t0034615 | 22 | 3 TGCGGTAGTAGATTGTATAGTA      | miRNA | let-7f    |
| t0033476 | 23 | 3 TGAGGTAGTAGATTGTATTGTTG     | miRNA | let-7f    |
| t0033755 | 23 | 3 TGAGGTAGTAGAATGTATAGTTA     | miRNA | let-7f    |
| t0033881 | 23 | 3 TGAGGTAGTAGATTGGATAGTTT     | miRNA | let-7f    |
| t0034310 | 21 | 3 CGAGGTAGTAGATTGCATAGT       | miRNA | let-7f    |
| t0034409 | 23 | 3 TGAGGTAGTCGATTGTATAGTTA     | miRNA | let-7f    |
| t0033011 | 22 | 3 TGAGGTAGTAGATTGTGTA CTT     | miRNA | let-7f    |
| t0033013 | 22 | 3 CGAGGTAGTAGATTGTATA CTT     | miRNA | let-7f    |
| t0033035 | 23 | 3 TGAGGTAGTTGATTGTATAGTTG     | miRNA | let-7f    |
| t0033102 | 23 | 3 TAAGGTAGTAGATTGTATAGTTT     | miRNA | let-7f    |
| t0033150 | 22 | 3 TGAGGTAGTAGCTTGCATAGTT      | miRNA | let-7f    |
| t0033338 | 21 | 3 TGAGGTAGTAGATTGTGTTGT       | miRNA | let-7f    |
| t0033353 | 23 | 3 TGAGGTAGTAGATTGTAAAGTTA     | miRNA | let-7f    |
| t0033357 | 23 | 3 TCAGGTAGTAGATTGTATAGTTG     | miRNA | let-7f    |
| t0033370 | 22 | 3 TGAGGTAGTAGATTGCATAGGT      | miRNA | let-7f    |
| t0033404 | 22 | 3 CGAGGTGGTAGATTGTATAGTT      | miRNA | let-7f    |
| t0033435 | 20 | 3 TGAGGTAGTAGAGTGTATAG        | miRNA | let-7f    |
| t0033591 | 22 | 3 TGGGGTAGTAGATTGTGTAGTT      | miRNA | let-7f    |
| t0033726 | 22 | 3 TGAGGAAGTAGATTGTTTAGTT      | miRNA | let-7f    |
| t0033751 | 22 | 3 TGAGGTCGTGCGATTGTATAGTT     | miRNA | let-7f    |
| t0033795 | 23 | 3 TGAGGTAGTAGATTCTATAGTTA     | miRNA | let-7f    |
| t0033819 | 19 | 3 TGATGTAGTAGATTGTATA         | miRNA | let-7f    |
| t0033836 | 22 | 3 TGAGGTAGTAGCTTGTGTAGTT      | miRNA | let-7f    |
| t0033838 | 23 | 3 TGAGGTAGTAGATCGTATAGTTA     | miRNA | let-7f    |
| t0033863 | 20 | 3 TGAGGTAGTAGATTGTGGAG        | miRNA | let-7f    |
| t0033877 | 22 | 3 TGAGGTAGTAGATTATATA CTT     | miRNA | let-7f    |
| t0033912 | 23 | 3 TGAGGTAGTAGATTGTTTAGTTG     | miRNA | let-7f    |
| t0033982 | 23 | 3 TGAGGTAGTAGATTGTCTAGTTA     | miRNA | let-7f    |
| t0033989 | 22 | 3 TGAGGTAGCAGATTGTATAGTA      | miRNA | let-7f    |
| t0034002 | 18 | 3 GAGGTAGTAGATTGTATT          | miRNA | let-7f    |
| t0034038 | 22 | 3 TGGGGTAGTAGATTGTATATTT      | miRNA | let-7f    |
| t0034080 | 22 | 3 TGGTGTAGTAGATTGTATAGTT      | miRNA | let-7f    |
| t0034207 | 23 | 3 TGAGCTAGTAGATTGTATAGTTT     | miRNA | let-7f    |
| t0034325 | 21 | 3 TGAGGTAGTAGATTGTGCAGT       | miRNA | let-7f    |
| t0034334 | 22 | 3 TGAGGTAGTAGATTGCATAGTG      | miRNA | let-7f    |
| t0034369 | 18 | 3 TGAGGTAGTAGATTATAT          | miRNA | let-7f    |
| t0034475 | 19 | 3 TGTGGTAGTAGATTGTATA         | miRNA | let-7f    |
| t0034488 | 27 | 3 TGAGGTAGTAGATTGTATAGTTAAAAA | miRNA | let-7f    |
| t0034513 | 21 | 3 TGAGGTAGTAGCTTGTCTAGT       | miRNA | let-7f    |
| t0034532 | 23 | 3 TGAGGTAGTAGATTGTATAGATT     | miRNA | let-7f    |
| t0034632 | 21 | 3 TGAGGTAGGAGATTGTATATT       | miRNA | let-7e    |
| t0034646 | 22 | 3 TGAGGAAGGAGATTGTATAGTT      | miRNA | let-7e    |
| t0034650 | 22 | 3 TGAGGTAGGAGATTGTACAGTT      | miRNA | let-7e    |
| t0034666 | 22 | 3 TGGGGTAGGAGATTGTATAGTT      | miRNA | let-7e    |
| t0034704 | 22 | 3 TGAGGTAGGAGATTGAATAGTT      | miRNA | let-7e    |
| t0034792 | 21 | 3 AGAGGTAGTAGGTTGCTTAGT       | miRNA | let-7d    |
| t0034900 | 22 | 3 AGAGGTTGTAGGTTGCATAGTT      | miRNA | let-7d    |
| t0035004 | 22 | 3 ATAGGTAGTAGGTTGCATAGTT      | miRNA | let-7d    |

|          |    |                              |       |        |
|----------|----|------------------------------|-------|--------|
| t0035037 | 20 | 3 AGAGGTAGTAGGTTGCATGG       | miRNA | let-7d |
| t0035045 | 21 | 3 AGAGGTAAGTAGGTTGCATAGT     | miRNA | let-7d |
| t0035048 | 21 | 3 ACAGGTAGTAGGTTGCATAGT      | miRNA | let-7d |
| t0035110 | 23 | 3 AGAGGTAGTAGGATGCATAGTTA    | miRNA | let-7d |
| t0035112 | 21 | 3 AGAGGTAGTAGGTCGCATAGT      | miRNA | let-7d |
| t0033897 | 21 | 3 AGAGGTAGTAAGTTGCATAGT      | miRNA | let-7d |
| t0033952 | 20 | 3 AGAGTAGTAGGTTGCATAG        | miRNA | let-7d |
| t0034667 | 19 | 3 GAGGTAGTAGGTTGCATAG        | miRNA | let-7d |
| t0034825 | 19 | 3 AGAGGAAGTAGGTTGCATA        | miRNA | let-7d |
| t0034959 | 21 | 3 AGAGGTAGTAGGTTGCATAGC      | miRNA | let-7d |
| t0033103 | 20 | 3 AGAGGTAGTAGGTTGCTTAG       | miRNA | let-7d |
| t0033218 | 20 | 3 AGAGGTAGTAGGTTGGATAG       | miRNA | let-7d |
| t0033222 | 20 | 3 AGTGGTAGTAGGTTGCATAG       | miRNA | let-7d |
| t0033365 | 20 | 3 AGAGGTAGTAGGTTACATAG       | miRNA | let-7d |
| t0033406 | 19 | 3 AGAGGTAGTAGGTTGTATA        | miRNA | let-7d |
| t0033527 | 21 | 3 TGAGGAAGTAGGTTGTATGGT      | miRNA | let-7c |
| t0033554 | 21 | 3 TGAGGCAGTAGGTTGTATGGT      | miRNA | let-7c |
| t0033579 | 25 | 3 TGAGGTAGTAGGTTATATGGTTATC  | miRNA | let-7c |
| t0033593 | 21 | 3 TGAGGTAGCAGGTTGTATGGT      | miRNA | let-7c |
| t0034147 | 25 | 3 TGAGGTATTAGGTTGTATGGTTATC  | miRNA | let-7c |
| t0034186 | 21 | 3 TGAGGTAGTAGGTTGTATGGT      | miRNA | let-7c |
| t0034613 | 24 | 3 TGAGGTAGTAGGTTGTATGGTTAT   | miRNA | let-7c |
| t0034621 | 25 | 3 TGAGGTAGTAGGTTGTATGGTTATA  | miRNA | let-7b |
| t0034838 | 19 | 3 TGAGGTAGTAGGTTGTGCG        | miRNA | let-7b |
| t0034963 | 23 | 3 TGAGGTAGTAGGTTGTGAGGTTA    | miRNA | let-7b |
| t0035115 | 23 | 3 TGAGGTAGTAGGTTGTGTGGGTA    | miRNA | let-7b |
| t0035145 | 23 | 3 TGAGGTAGTAGGTTGTGGGGTAT    | miRNA | let-7b |
| t0035177 | 23 | 3 TGAGGTAGTAGGTTGTGCGGTTG    | miRNA | let-7b |
| t0033158 | 21 | 3 CGAGGCAGTAGGTTGTGTGGT      | miRNA | let-7b |
| t0033364 | 20 | 3 TGACGTAGTAGGTTGTGTGG       | miRNA | let-7b |
| t0033531 | 24 | 3 TGAGGAAGTAGGTTGTGTGGTTAT   | miRNA | let-7b |
| t0033761 | 23 | 3 TGAGGTAGTAGGATGTGTGGTTG    | miRNA | let-7b |
| t0033985 | 23 | 3 TGAGGTAGTAGGTTGTGTGGTTG    | miRNA | let-7b |
| t0035011 | 23 | 3 GAGGTAGTAGGTTGTGTGGTTAA    | miRNA | let-7b |
| t0035034 | 23 | 3 TGAGGTAGTAGGTTGTGTGGAAA    | miRNA | let-7b |
| t0033017 | 23 | 3 TGAGGTAGTAGGTTGTGTGGGTAA   | miRNA | let-7b |
| t0033124 | 24 | 3 TGAGGTAGTAGGTTGCGTGGTTAA   | miRNA | let-7b |
| t0033165 | 19 | 3 TGAGGTAGGAGGTTGTGTG        | miRNA | let-7b |
| t0033200 | 23 | 3 TGAGGTAGGAGGTTGTGTGGTTG    | miRNA | let-7b |
| t0033258 | 19 | 3 TGCAGTAGTAGGTTGTGTG        | miRNA | let-7b |
| t0033319 | 19 | 3 TGAGGTAGTAGGTTGTGAG        | miRNA | let-7b |
| t0033320 | 22 | 3 TGAGGTAGTAGGTTGTGTGGAC     | miRNA | let-7b |
| t0033408 | 23 | 3 TAAGGTAGTAGGTTGTGTGGTTT    | miRNA | let-7b |
| t0033550 | 22 | 3 TGAGGTAGTGGGTTGTGGGGTT     | miRNA | let-7b |
| t0033717 | 24 | 3 TGAGGTAGTAGGTCGTGTGGTTAT   | miRNA | let-7b |
| t0033778 | 22 | 3 TGAGGTAGTAAGTTGTGTGGTA     | miRNA | let-7b |
| t0033821 | 23 | 3 TGAGGTAGTACGTTGTGTGGTTA    | miRNA | let-7b |
| t0033823 | 22 | 3 TGAGGTAGTTGTTGTGTGGTA      | miRNA | let-7b |
| t0033842 | 23 | 3 AGAGGTAGTAGGTTGTGTGGTTA    | miRNA | let-7b |
| t0033844 | 23 | 3 TGAGGTAGTAGGTTGTGTGGAT     | miRNA | let-7b |
| t0033935 | 23 | 3 CGAGGTAGTAGGTTGTGTGGTTT    | miRNA | let-7b |
| t0034055 | 19 | 3 TGAGGTAGTGGGTTGTGTG        | miRNA | let-7b |
| t0034057 | 23 | 3 TGAGCTAGTAGGTTGTGTGGTTT    | miRNA | let-7b |
| t0034145 | 23 | 3 TGAGGTAGTAGGTTGTGTGGCTT    | miRNA | let-7b |
| t0034149 | 23 | 3 TGAGGTAGTAGGATGTGTGGTAA    | miRNA | let-7b |
| t0034301 | 24 | 3 TGAGGTAGTAGGTTGTGCGGTTAG   | miRNA | let-7b |
| t0034311 | 26 | 3 TGAGGTAGTAGATTGTGTGGTTTATC | miRNA | let-7b |
| t0034374 | 22 | 3 TGAGGTAGTAGGTTGTGTGGGG     | miRNA | let-7b |

|          |    |                            |       |            |
|----------|----|----------------------------|-------|------------|
| t0034426 | 21 | 3 TGAGGTAGTAGGGTGTGGGGT    | miRNA | let-7b     |
| t0034486 | 23 | 3 TGAGGTAGTAAGTTGTGTGGTTA  | miRNA | let-7b     |
| t0034493 | 20 | 3 TGAGCTAGTAGGTTGTGTGG     | miRNA | let-7b     |
| t0034551 | 22 | 3 TGAGGTAGTAGCTTGTATAGTA   | miRNA | let-7-5p   |
| t0034624 | 22 | 3 TGAGGTAGTGGGTTGTATAGTA   | miRNA | let-7-5p   |
| t0034660 | 22 | 3 TGAGGTAGTAGGTTGTCTAGTA   | miRNA | let-7-5p   |
| t0034676 | 23 | 3 TGAGGTGGTAGGTTGTATAGTTT  | miRNA | let-7      |
| t0034720 | 20 | 3 TGATGTAGTAGGTTGTATAG     | miRNA | let-7      |
| t0034753 | 19 | 3 TTAGGTAGTAGGTTGTATA      | miRNA | let-7      |
| t0034803 | 21 | 3 TGAGGTAGTAGGTTGTAGAGT    | miRNA | let-7      |
| t0034903 | 22 | 3 TGAGGTAGGAGGGTGTATAGTT   | miRNA | let-7      |
| t0034982 | 22 | 3 TGAGGTAGTAGGTTTTATAGTT   | miRNA | let-7      |
| t0035019 | 19 | 3 TGAGGTCGTAGGTTGTATA      | miRNA | let-7      |
| t0035020 | 23 | 3 TGAGGTCGTAGGTTGTATAGTTA  | miRNA | let-7      |
| t0035049 | 19 | 3 TAAGGTAGTAGGTTGTATA      | miRNA | let-7      |
| t0035182 | 24 | 2 TGAAGTATAGATGCTCGGCTTTT  | miRNA | miR-996    |
| t0033273 | 20 | 2 CTATACAACTTACTACTTTT     | miRNA | miR-98*    |
| t0034413 | 19 | 2 TATACAACTTACTACTTTT      | miRNA | miR-98*    |
| t0034631 | 20 | 2 TGAGGGAGTAAGTTGTATTG     | miRNA | miR-98     |
| t0033073 | 22 | 2 CACCCGGCTGTGGGCACATGTG   | miRNA | miR-941    |
| t0033540 | 22 | 2 CAAAGCGCTGTTTCGTGCAGGTA  | miRNA | miR-93     |
| t0033658 | 21 | 2 CAAAGTGCTGTTAGTGCAGGT    | miRNA | miR-93     |
| t0033988 | 22 | 2 CAAAGTGCTGTTTCGAGCAGGTA  | miRNA | miR-93     |
| t0034189 | 23 | 2 CAAAGTGCTATTCGTGCAGGTAG  | miRNA | miR-93     |
| t0034246 | 23 | 2 CAAAGTGCTGTTTGTGCAGGTAG  | miRNA | miR-93     |
| t0034519 | 21 | 2 CAAAGTGCCGTTTCGTGCAGGT   | miRNA | miR-93     |
| t0034694 | 22 | 2 CAAAGTACTGTTTCGTGCAGGTA  | miRNA | miR-93     |
| t0034949 | 21 | 2 AAAGTGCTGTTTCGTGCAGGGA   | miRNA | miR-93     |
| t0036759 | 22 | 2 CGAAGTGCTGTTTCGTGCAGGTA  | miRNA | miR-93     |
| t0037815 | 21 | 2 CAAAGAGCTGTTTCGTGCAGGT   | miRNA | miR-93     |
| t0038061 | 21 | 2 CGAAGTGCTGTTTCGTGCAGGT   | miRNA | miR-93     |
| t0039573 | 23 | 2 CAAAGCGCTGTTTCGTGCAGGTAG | miRNA | miR-93     |
| t0038088 | 22 | 2 CAAAGTGCTGTTAGTGCAGGTA   | miRNA | miR-93     |
| t0035308 | 23 | 2 CAAAGTGCTGTTTCGTGCAGGTCT | miRNA | miR-93     |
| t0035939 | 23 | 2 CAAAGTGATGTTTCGTGCAGGTAG | miRNA | miR-93     |
| t0035986 | 21 | 2 CAAAGTGCTGTTTCGTGTAGGT   | miRNA | miR-93     |
| t0036085 | 21 | 2 CAAAGTGCTGTTTCGTGCAGGA   | miRNA | miR-93     |
| t0036105 | 21 | 2 CAAAGCGCTGTTTCGTGCAGGT   | miRNA | miR-93     |
| t0036538 | 23 | 2 CAAGGTGCTGTTTCGTGCAGGTAG | miRNA | miR-93     |
| t0037064 | 23 | 2 CAAAGGGCTGTTTCGTGCAGGTAG | miRNA | miR-93     |
| t0037221 | 23 | 2 TATTGTAAGTGTCCCGCCTGTA   | miRNA | miR-92d    |
| t0037251 | 22 | 2 AATTGCACTTGTCCCGCCTGT    | miRNA | miR-92c    |
| t0037835 | 23 | 2 TATTGCACTTGTCCCGCCTGCA   | miRNA | miR-92b-3p |
| t0037876 | 22 | 2 TATCGCACTTGTCCCGCCTGA    | miRNA | miR-92b-3p |
| t0038000 | 22 | 2 ATTGCACTTGTCCCGCCTGTC    | miRNA | miR-92b-3p |
| t0038090 | 22 | 2 TATTGCACTTGTACCGCCTGA    | miRNA | miR-92b-3p |
| t0038538 | 22 | 2 TATTGCACTTGTACCGCCTGA    | miRNA | miR-92b-3p |
| t0039486 | 22 | 2 TATTGCACTTGTCCCGCCTGA    | miRNA | miR-92b-3p |
| t0039972 | 20 | 2 AGGGACGGGCGCGGTGCAG      | miRNA | miR-92b*   |
| t0039984 | 21 | 2 AGGGACGGGATGCGGTGCAGT    | miRNA | miR-92b*   |
| t0040086 | 20 | 2 AGGGACGGGACGCGGAGCAG     | miRNA | miR-92b*   |
| t0040100 | 21 | 2 AGGGACGGGACGCGGTGCAGG    | miRNA | miR-92b*   |
| t0040167 | 22 | 2 TATTGCACTTGTCCCGCCTTTT   | miRNA | miR-92b    |
| t0035855 | 21 | 2 TATTGCACTTGTCCCGCCTTT    | miRNA | miR-92b    |
| t0039851 | 22 | 2 CATTGCACTTGTCCCGGTCTGT   | miRNA | miR-92a-3p |
| t0036668 | 25 | 2 TATTGCACTTGTCCCGCCTGTATC | miRNA | miR-92a    |
| t0037145 | 23 | 2 TATTGCACTTGTCCCGCCTGTA   | miRNA | miR-92a    |
| t0037290 | 21 | 2 TATTGCACTTGTCCCGGCCCG    | miRNA | miR-92a    |

|          |    |                               |       |             |
|----------|----|-------------------------------|-------|-------------|
| t0037753 | 21 | 2 TATTGCACTTGTCCCCGCCTG       | miRNA | miR-92a     |
| t0039260 | 23 | 2 TATTGCACTTGTCCCAGCCTGTA     | miRNA | miR-92a     |
| t0040430 | 22 | 2 TATTGCACTTGTCCCGGCCTCT      | miRNA | miR-92a     |
| t0035673 | 22 | 2 TATTGCACTTGACCCGGCCTGT      | miRNA | miR-92a     |
| t0037786 | 21 | 2 TATTGCACTTGTCAAGGCCTG       | miRNA | miR-92a     |
| t0039960 | 23 | 2 TATTGCACTTGTACAGGCCTGTA     | miRNA | miR-92a     |
| t0040573 | 23 | 2 TATTGCACTTGTCCAGGCCTGTA     | miRNA | miR-92a     |
| t0035734 | 22 | 2 TATTGGACTTGTCCCGGCCTGT      | miRNA | miR-92a     |
| t0037093 | 23 | 2 TATTGCACTTGTCCAGGCCTGTT     | miRNA | miR-92a     |
| t0039971 | 22 | 2 TATTGCGCTTGTCCCGGCCTGT      | miRNA | miR-92a     |
| t0035618 | 20 | 2 TATTGCACTAGTCCCGGCCT        | miRNA | miR-92a     |
| t0036006 | 21 | 2 TATTGCCCTTGTCCCGGCCTG       | miRNA | miR-92a     |
| t0036231 | 22 | 2 TATCGCACTTGTCCCGGCCTGT      | miRNA | miR-92a     |
| t0036880 | 22 | 2 TATTGAACTTGTCCCGGCCTGT      | miRNA | miR-92a     |
| t0037058 | 21 | 2 TATTGCACTAGTCCCGGCCTG       | miRNA | miR-92a     |
| t0037667 | 21 | 2 TATTGCACTTGTGCGGCCTG        | miRNA | miR-92a     |
| t0038058 | 21 | 2 TAATGCACTTGTCCCGGCCTG       | miRNA | miR-92a     |
| t0038134 | 21 | 2 TATTGCACTTGTCTGGCCTG        | miRNA | miR-92a     |
| t0038186 | 21 | 2 TATTGCACTTGTCCCGGACTA       | miRNA | miR-92a     |
| t0038215 | 23 | 2 TATCGCACTTGTCCCGGCCTGTT     | miRNA | miR-92a     |
| t0038347 | 22 | 2 TATTGCACTTGCCCCGGCCTGT      | miRNA | miR-92a     |
| t0038469 | 21 | 2 TATTGAACTTGTCCCGGCCTG       | miRNA | miR-92a     |
| t0038482 | 22 | 2 TATTGCACCTGTCCCGGCCTGT      | miRNA | miR-92a     |
| t0038611 | 22 | 2 TATTGCACTTGGCCCGGCCTGT      | miRNA | miR-92a     |
| t0038622 | 21 | 2 TATTGGACTTGTCCCGGCCTG       | miRNA | miR-92a     |
| t0038706 | 21 | 2 TATTGCAATCGTCCCGGCCTA       | miRNA | miR-92      |
| t0038766 | 20 | 2 TATTGAACTCGTCCCGGCCT        | miRNA | miR-92      |
| t0038898 | 20 | 2 TATTGCACTCGTACAGGCCT        | miRNA | miR-92      |
| t0038931 | 22 | 2 GTAGAGGAGATGGAGCAGGGGA      | miRNA | miR-877     |
| t0039208 | 23 | 2 GTAGAGGAGATGGAGCAGGGGAA     | miRNA | miR-877     |
| t0039413 | 23 | 2 TGGAGAGAAAGGAAGTTCATGAA     | miRNA | miR-765     |
| t0039622 | 23 | 2 TGGAAGACTGGGGATATGTTGTT     | miRNA | miR-7-5p    |
| t0039734 | 26 | 2 AAGTTGGATTGTGACTGGCACCTTTT  | miRNA | miR-753c    |
| t0039870 | 27 | 2 AAGTTGGATTGTGACTGGCAAGGGGAA | miRNA | miR-753c    |
| t0039958 | 22 | 2 TGCGGGGCTAGGGCTAACAGCC      | miRNA | miR-744     |
| t0040331 | 22 | 2 TGCGGGGCTAGGGCTAACAGAA      | miRNA | miR-744     |
| t0040482 | 22 | 2 TGCGGGGCTAGGGCTAAAAGCA      | miRNA | miR-744     |
| t0040495 | 23 | 2 GAAGACTGAAGTGGAGGAGGGTT     | miRNA | miR-739     |
| t0036775 | 23 | 2 TGAAGTCTGAAGTGGAGAAGGGT     | miRNA | miR-739     |
| t0037512 | 23 | 2 TGAGGACTGAAGTGGAGAAGGGT     | miRNA | miR-739     |
| t0038216 | 24 | 2 GAAGACTGAAGAGGAGAAGGGTTT    | miRNA | miR-739     |
| t0035339 | 23 | 2 GAAGACTGAAGGGGAGAAGGGTT     | miRNA | miR-739     |
| t0039741 | 24 | 2 TGAAAGACGATGGTAGTGAGATGA    | miRNA | miR-71      |
| t0039583 | 23 | 2 TGAAAGACGATGGTAGTGAGATA     | miRNA | miR-71      |
| t0039330 | 26 | 2 AGGGCGCGCGGGTTCGGGGCGGCGGGT | miRNA | miR-638     |
| t0035642 | 23 | 2 AGGGCGCGCGGGTTCGGGGAGGCG    | miRNA | miR-638     |
| t0037695 | 21 | 2 TGGGTTTACGTTGGGAGCACT       | miRNA | miR-629     |
| t0036521 | 18 | 2 TGGGTTTACGTTGGGGGA          | miRNA | miR-629     |
| t0037080 | 20 | 2 TGGGTTTACGTTGGGAGCAC        | miRNA | miR-629     |
| t0038384 | 20 | 2 TCTAGTAAGAGTGGCAGTCG        | miRNA | miR-628-3p  |
| t0037605 | 22 | 2 TATGTCATCGTTGTCATCGTCA      | miRNA | miR-598     |
| t0038077 | 22 | 2 TACGTCATCGTTGTCATCGTAA      | miRNA | miR-598     |
| t0039706 | 22 | 2 ATTATGGTTTGCCTGGGGCTGA      | miRNA | miR-584     |
| t0040374 | 22 | 2 TTATGGTTTGCCTGGGACTGAA      | miRNA | miR-584     |
| t0040413 | 21 | 2 TTATGGTTTGCCTTGGACTGA       | miRNA | miR-584     |
| t0036319 | 21 | 2 AAAAGTAATTGCGTTTTTGC        | miRNA | miR-548c-5p |
| t0039872 | 22 | 2 TCTCCACACCCAAGGCTTGCC       | miRNA | miR-532-3p  |
| t0036661 | 22 | 2 CCTCCAAACCCAAGGCTTGCA       | miRNA | miR-532-3p  |

|          |    |                                |       |            |
|----------|----|--------------------------------|-------|------------|
| t0037074 | 22 | 2 CCTCCCACACCCAAGGCTTGGA       | miRNA | miR-532-3p |
| t0037937 | 22 | 2 CCTCCCACACACAAGGCTTGCA       | miRNA | miR-532-3p |
| t0038360 | 22 | 2 CCTCACACACCCAAGGCTTGCA       | miRNA | miR-532-3p |
| t0038914 | 22 | 2 CCTCCCACACCAAAGGCTTGCA       | miRNA | miR-532-3p |
| t0039976 | 22 | 2 TCTGGGCACAGGCGGGTGGACA       | miRNA | miR-5107   |
| t0039308 | 22 | 2 TCTGGGCCAGGCGGATGGACA        | miRNA | miR-5107   |
| t0040644 | 23 | 2 TGGGCACAGGCGGATGGACAGGA      | miRNA | miR-5107   |
| t0037717 | 23 | 2 TGGGCACAGGCGGATGGACAGGG      | miRNA | miR-5107   |
| t0038068 | 22 | 2 TCTGGGCACAGGCGGCTGGACA       | miRNA | miR-5107   |
| t0039707 | 20 | 2 TAGCAGCGGAACAATTCTG          | miRNA | miR-503    |
| t0036115 | 23 | 2 TCCTGTGCTGAGCTGCCCCGAGT      | miRNA | miR-486-5p |
| t0035206 | 22 | 2 TCCTGTACTGAGCTGCTCCGCG       | miRNA | miR-486-5p |
| t0037114 | 23 | 2 TCCTGTACTGAGCTGCTCCGAGT      | miRNA | miR-486-5p |
| t0038143 | 21 | 2 TCCTGTACTGAGCTGACACGA        | miRNA | miR-486-5p |
| t0038197 | 22 | 2 TCCTGTACTGAGATGCCCTGAG       | miRNA | miR-486-5p |
| t0039224 | 23 | 2 TCCCGTACTGAGCTGCCCCGAGT      | miRNA | miR-486-5p |
| t0039751 | 23 | 2 TCCTGTACTGGGCTGCCCCGAGT      | miRNA | miR-486-5p |
| t0035281 | 24 | 2 TCCTGTACTGAGCTGCCCCGAGCA     | miRNA | miR-486-5p |
| t0037316 | 22 | 2 TCCTGTACTGAGCTGCCACGAA       | miRNA | miR-486-5p |
| t0038071 | 21 | 2 TCCTGTACTGAGCTGACCAGA        | miRNA | miR-486-5p |
| t0038127 | 22 | 2 TCCTGTACTGAGATGCCCCGCG       | miRNA | miR-486-5p |
| t0040435 | 21 | 2 TCCTGTACAGAGCTGCCCCGA        | miRNA | miR-486-5p |
| t0035708 | 22 | 2 TCCTGTACTGAGCCGCCCCGAA       | miRNA | miR-486-5p |
| t0035319 | 20 | 2 TCCTGTACTGACCTGCCCCG         | miRNA | miR-486-5p |
| t0035444 | 26 | 2 TCCTGTACTGAGCTGCACCGAGAAGA   | miRNA | miR-486-5p |
| t0035456 | 23 | 2 TCCTGTACTGAGCTGCCTCGAGT      | miRNA | miR-486-5p |
| t0035492 | 22 | 2 TCCTGTAATGAGCTGCCAGAG        | miRNA | miR-486-5p |
| t0035535 | 21 | 2 TCCTGTACTGAGATGACCCGA        | miRNA | miR-486-5p |
| t0035537 | 24 | 2 TCCTGCACTGAGCTGCCCCGAGAG     | miRNA | miR-486-5p |
| t0035574 | 26 | 2 TCCTGTACTGAGCTGCCCCGCGATGG   | miRNA | miR-486-5p |
| t0035686 | 19 | 2 TCCGTACTGAGCTGCCCCG          | miRNA | miR-486-5p |
| t0035776 | 23 | 2 TCCTGTAATGAGCTGCCACGAGA      | miRNA | miR-486-5p |
| t0035951 | 23 | 2 TCCTGTACTGAGCTGCTCCGCGA      | miRNA | miR-486-5p |
| t0036098 | 28 | 2 TCCTGTACTGAGCTGCCCCGCGACGGCG | miRNA | miR-486-5p |
| t0036177 | 23 | 2 TCCTGTACTGAACTGCCCCGAGT      | miRNA | miR-486-5p |
| t0036266 | 21 | 2 TTCTGTACTGAGCTGACCCGA        | miRNA | miR-486-5p |
| t0036289 | 21 | 2 TCCTGTATTGAGCTGCCCCGCG       | miRNA | miR-486-5p |
| t0036472 | 28 | 2 TCCTGTACTGAGCTGCTCCGAGACGGCA | miRNA | miR-486-5p |
| t0036531 | 22 | 2 CCTGTACTGAGCTGCCCCGAGG       | miRNA | miR-486-5p |
| t0036595 | 20 | 2 TCCTGTACTGAGCTCCCCCG         | miRNA | miR-486-5p |
| t0036646 | 21 | 2 TCCTGTACTGAGATGCACCGA        | miRNA | miR-486-5p |
| t0036660 | 20 | 2 TCCTGTACTGAGCTGCCGCG         | miRNA | miR-486-5p |
| t0036752 | 23 | 2 TCCTGTACTGAGCTGCCCCGAAC      | miRNA | miR-486-5p |
| t0036781 | 21 | 2 TACTGTAATGAGCTGCCCCGA        | miRNA | miR-486-5p |
| t0036792 | 24 | 2 TCCTGTACTGAGCTGCCCCGCGAT     | miRNA | miR-486-5p |
| t0036936 | 23 | 2 TCCTGTACTCAGCTGCCCCGAGA      | miRNA | miR-486-5p |
| t0036956 | 23 | 2 TCCTGTACTGAGCTGCCAGAGT       | miRNA | miR-486-5p |
| t0036957 | 21 | 2 TCCTGTACTGAGTTGCCCCGCG       | miRNA | miR-486-5p |
| t0037102 | 21 | 2 TCATGTACTGAGATGCCCCGA        | miRNA | miR-486-5p |
| t0037271 | 28 | 2 TCCTGTACTGAGCTACCCCGAGACGGCA | miRNA | miR-486-5p |
| t0037277 | 23 | 2 TCGTGTACTGAGCTGCCCCGAGA      | miRNA | miR-486-5p |
| t0037318 | 22 | 2 TCCTGTACTGAGCTGACACGAG       | miRNA | miR-486-5p |
| t0037368 | 22 | 2 TCCTGTACTGAGATACCCCGAG       | miRNA | miR-486-5p |
| t0037531 | 23 | 2 TCCTGTACTGAGCTGTCCCGCGA      | miRNA | miR-486-5p |
| t0037580 | 26 | 2 CCCTGTACTGAGCTGCCCCGAGAAGA   | miRNA | miR-486-5p |
| t0037629 | 21 | 2 TCATGTACTGAGCTGCCAGAG        | miRNA | miR-486-5p |
| t0037650 | 20 | 2 CTGTACTGAGCTGTCCCGAA         | miRNA | miR-486-5p |
| t0037652 | 21 | 2 CCTGTACTGAGCTGCCTCGAG        | miRNA | miR-486-5p |

|          |    |                                  |       |             |
|----------|----|----------------------------------|-------|-------------|
| t0037715 | 23 | 2 CCCTG TACTGAGCTGCCCCGAGA       | miRNA | miR-486-5p  |
| t0037796 | 20 | 2 TCCTGTGCTGAGCTGCCCCG           | miRNA | miR-486-5p  |
| t0037805 | 23 | 2 TCCTG TACTGCGCTGCCCCGAGT       | miRNA | miR-486-5p  |
| t0037836 | 29 | 2 TCCTG TACTGAGCTGCCCCGAGGCCGGC/ | miRNA | miR-486-5p  |
| t0037885 | 24 | 2 TCCTG TACTGAGCTGCCCCGCAGA      | miRNA | miR-486-5p  |
| t0038009 | 22 | 2 TCCTATACTGAGCTGCCCCGAA         | miRNA | miR-486-5p  |
| t0038019 | 22 | 2 TCCTATACTGAGCTGACCCGAG         | miRNA | miR-486-5p  |
| t0038038 | 23 | 2 TCTTG TACTGAGCTGCCCCGAGG       | miRNA | miR-486-5p  |
| t0038055 | 20 | 2 TCCTG TACTGAGCTGCTCCG          | miRNA | miR-486-5p  |
| t0038160 | 23 | 2 TCCTGTACGGAGCTGCCCCGAGA        | miRNA | miR-486-5p  |
| t0038266 | 22 | 2 TCCTGTATTGAGCTGCCCCGCG         | miRNA | miR-486-5p  |
| t0038319 | 22 | 2 TCCTG TACTGAGCTGCCCCGTT        | miRNA | miR-486-5p  |
| t0038336 | 23 | 2 TCTTG TACTGAGCTGCCCCAAGA       | miRNA | miR-486-5p  |
| t0038502 | 20 | 2 TCCTGTACCGAGCTGCCCCG           | miRNA | miR-486-5p  |
| t0038506 | 23 | 2 GCCTG TACTGAGCTGCCCCGAGA       | miRNA | miR-486-5p  |
| t0038619 | 22 | 2 TCCTG TACTGAGCTGCGCCGAA        | miRNA | miR-486-5p  |
| t0038651 | 22 | 2 TCCTG TACTGAGATGCCCCGAT        | miRNA | miR-486-5p  |
| t0038671 | 21 | 2 TACAG TACTGAGCTGCCCCGA         | miRNA | miR-486-5p  |
| t0038884 | 22 | 2 TCCTG TACTGAGCTGCAACGAG        | miRNA | miR-486-5p  |
| t0039101 | 26 | 2 TCCTG TACTGAGCTGCCCCGAGGCC     | miRNA | miR-486-5p  |
| t0039117 | 23 | 2 TCCTG TACTGAGCGGCCCCGAGA       | miRNA | miR-486-5p  |
| t0039153 | 23 | 2 TCCTG TACTGAGCTTCCCCGAGA       | miRNA | miR-486-5p  |
| t0039191 | 21 | 2 TCCTG TACTGAACTGCCTCGA         | miRNA | miR-486-5p  |
| t0039310 | 22 | 2 TAGATGTAGGATTGTGTCGGTT         | miRNA | miR-4860    |
| t0039376 | 25 | 2 TGTAGGATTGTGTCGGCAGATTTTT      | miRNA | miR-4860    |
| t0039659 | 20 | 2 AATGTAGAATTGTGTCGGCA           | miRNA | miR-4860    |
| t0039665 | 21 | 2 TAGGATTGTGTCGGCAGATCT          | miRNA | miR-4860    |
| t0039697 | 24 | 2 TGTAGGATTGTGTCGGCCGATTTT       | miRNA | miR-4860    |
| t0039723 | 21 | 2 TGGAGAGCAGGGAGCAGGAAG          | miRNA | miR-4732-5p |
| t0039979 | 21 | 2 TGCAGAGCAGGGAGCAGGAAG          | miRNA | miR-4732-5p |
| t0040075 | 21 | 2 TGTAGAGCAGGGAGGAGGAAG          | miRNA | miR-4732-5p |
| t0040249 | 22 | 2 TGTGGAGCAGGGAGCAGGAAGC         | miRNA | miR-4732-5p |
| t0040297 | 23 | 2 TGTAGAGCAGGGCGCAGGAAGCA        | miRNA | miR-4732-5p |
| t0040340 | 23 | 2 TGTAGAACAGGGAGCAGGAAGCT        | miRNA | miR-4732-5p |
| t0040533 | 21 | 2 TGAAGAGCAGGGAGCAGGAAG          | miRNA | miR-4732-5p |
| t0040574 | 23 | 2 TGTAGAGCAGGGAGCACGAAGCT        | miRNA | miR-4732-5p |
| t0037275 | 23 | 2 TGTAGAGCAGGGGGCAGGAAGCA        | miRNA | miR-4732-5p |
| t0038254 | 21 | 2 TGTAGAGCGGGGAGCAGGAAG          | miRNA | miR-4732-5p |
| t0038882 | 23 | 2 TGTAGAGCAGGGAGCCGGAAGCT        | miRNA | miR-4732-5p |
| t0039645 | 23 | 2 TGTAGAGCAGGGTGCAGGAAGCT        | miRNA | miR-4732-5p |
| t0040490 | 21 | 2 TGTAGAGCAGGGAGCAGGACG          | miRNA | miR-4732-5p |
| t0035494 | 21 | 2 TGTAGAGCAGGGAGCGGGAAG          | miRNA | miR-4732-5p |
| t0035632 | 23 | 2 TGTAGAGCCGGGAGCAGGAAGCT        | miRNA | miR-4732-5p |
| t0035915 | 23 | 2 TGTAGAGCAGGGAGCAGGAATCT        | miRNA | miR-4732-5p |
| t0036365 | 23 | 2 TGTAGCGCAGGGAGCAGGAAGCT        | miRNA | miR-4732-5p |
| t0036484 | 26 | 2 TGTAGAGCAGGGAGCAGGAAGCTGAG     | miRNA | miR-4732-5p |
| t0036557 | 21 | 2 TGTAGAGCAGGAAGCAGGAAG          | miRNA | miR-4732-5p |
| t0036743 | 21 | 2 TGTAGAGCAGGGAGTAGGAAG          | miRNA | miR-4732-5p |
| t0036776 | 21 | 2 TGTGGAGCAGGGAGCAGGAAG          | miRNA | miR-4732-5p |
| t0037488 | 23 | 2 TGTAGAGCAGGGAGCAGGAAGAA        | miRNA | miR-4732-5p |
| t0037560 | 23 | 2 TGTAGAGCAGGGAGAAGGAAGAT        | miRNA | miR-4732-5p |
| t0037668 | 21 | 2 TGTAGAGCAGGGAGCAAGAAG          | miRNA | miR-4732-5p |
| t0038098 | 21 | 2 TGTGGAAGTGGTCTGAGGCAT          | miRNA | miR-4657    |
| t0038205 | 26 | 2 AGGGCTGGGTTCGGCCGGGCTGGGGCG    | miRNA | miR-4651    |
| t0038455 | 28 | 2 AGGGCTGGGTTCGGTCGGGCTGGGGGGCC  | miRNA | miR-4651    |
| t0038668 | 26 | 2 AGGGCTGGGTTCGGTCGGGCTGGGGGG    | miRNA | miR-4651    |
| t0038709 | 30 | 2 AGGGCTGGGTTCGGTCGGGCTGGGGCGCC  | miRNA | miR-4651    |
| t0039001 | 19 | 2 GGCTGGGTTCGGTCGGGCTG           | miRNA | miR-4651    |

|          |    |                                |       |          |
|----------|----|--------------------------------|-------|----------|
| t0039265 | 26 | 2 AGGGCTGGGTTCGGCCGGGCTGGGGCG  | miRNA | miR-4651 |
| t0039425 | 27 | 2 AGGGCTGGGTTCGGTCGGGATGGGGCGC | miRNA | miR-4651 |
| t0039630 | 23 | 2 TCGACTCTGGATAGCTGGGCTTT      | miRNA | miR-4538 |
| t0040067 | 22 | 2 TCGACTCTGGATAGCTGGGCTT       | miRNA | miR-4538 |
| t0040228 | 25 | 2 AGAAGGGTTCGGGGCGGCAGGGGCCG   | miRNA | miR-4516 |
| t0040314 | 19 | 2 GAAGGGTTCGGGGCGGCAGG         | miRNA | miR-4516 |
| t0040563 | 20 | 2 GGAGAAGGGTTCGGGGCGGAT        | miRNA | miR-4516 |
| t0037257 | 20 | 2 TGAGGGAGTAGGTTGTGTGA         | miRNA | miR-4510 |
| t0035856 | 22 | 2 TGAGGGAGTAGGTTCTGTGGTT       | miRNA | miR-4510 |
| t0035974 | 23 | 2 TGAGGTAGTAGGGTGTGTGGTAT      | miRNA | miR-4510 |
| t0036253 | 22 | 2 TGAGGGAATAGGTTGTGTGGTT       | miRNA | miR-4510 |
| t0037602 | 22 | 2 TGAGGGAGTAGGTTGAGTGGTT       | miRNA | miR-4510 |
| t0038271 | 23 | 2 TGAGGGAGTAGGTTGTGTGGGTT      | miRNA | miR-4510 |
| t0039169 | 21 | 2 TGAGGAAGTAGGGTGTGTGGT        | miRNA | miR-4510 |
| t0039882 | 25 | 2 TGAGGGAGTAGGTTGTGTGGTTATC    | miRNA | miR-4510 |
| t0035526 | 24 | 2 TGAGGGAGTAGGTTGTGTGGTATC     | miRNA | miR-4510 |
| t0036172 | 21 | 2 AAACCGTTTCCATTACTGAGT        | miRNA | miR-451  |
| t0037998 | 24 | 2 AAAGCGTTACCATTACTGAGTTTA     | miRNA | miR-451  |
| t0038301 | 26 | 2 AAACCGTTAGCATTACTGAGTTTAGT   | miRNA | miR-451  |
| t0040502 | 23 | 2 AAACCGTTAACATTAATGAGTTT      | miRNA | miR-451  |
| t0035718 | 22 | 2 AACCGTTACCATTACTGCGTTT       | miRNA | miR-451  |
| t0035980 | 25 | 2 AAACCGTTACCATTACGGAGTTTAG    | miRNA | miR-451  |
| t0036923 | 19 | 2 AAACCGTTACCATTACTCA          | miRNA | miR-451  |
| t0038316 | 23 | 2 AAACAGTTACCATTAATGAGTTT      | miRNA | miR-451  |
| t0038675 | 25 | 2 AAACCGTTACCATTACTAAGTTTAG    | miRNA | miR-451  |
| t0038860 | 23 | 2 AAACCGTTACCATCACTGAGTAA      | miRNA | miR-451  |
| t0039093 | 22 | 2 AAACCGTTACCATCACTGGGTT       | miRNA | miR-451  |
| t0039580 | 24 | 2 AAACCGTTACCATTGCTGAGTTTA     | miRNA | miR-451  |
| t0040587 | 19 | 2 AAACCGTTACCATTACCGA          | miRNA | miR-451  |
| t0035219 | 23 | 2 AAACCTTACCATTACTGAGGTT       | miRNA | miR-451  |
| t0035256 | 24 | 2 AAACCGTTACAATTACTGAGTTTA     | miRNA | miR-451  |
| t0035408 | 22 | 2 AAACCGTTAAAATTACTGAGTT       | miRNA | miR-451  |
| t0035423 | 21 | 2 AAACCTTACCATTATTGAGT         | miRNA | miR-451  |
| t0035508 | 22 | 2 AAACCGTTACCATGACTGAGTT       | miRNA | miR-451  |
| t0035717 | 24 | 2 AAACCGTTACCATACTGAGTTTA      | miRNA | miR-451  |
| t0035743 | 24 | 2 CAACCGTTACCATTACTGAGTTTA     | miRNA | miR-451  |
| t0035756 | 19 | 2 AAACCGGTACCATTACTGA          | miRNA | miR-451  |
| t0035761 | 22 | 2 AACCGTTACCATTATTGAGTTT       | miRNA | miR-451  |
| t0035829 | 22 | 2 AAAACGTTACCATTACTGCGTT       | miRNA | miR-451  |
| t0035988 | 24 | 2 AGACCGTTACCATTACTGAGTTTA     | miRNA | miR-451  |
| t0036005 | 25 | 2 AGACCGTTACCATTACTGAGTTTAG    | miRNA | miR-451  |
| t0036077 | 19 | 2 AAAACGTTACCATTACTGA          | miRNA | miR-451  |
| t0036165 | 23 | 2 ACACCGTTACCATTACTGAGTTT      | miRNA | miR-451  |
| t0036192 | 21 | 2 AAACCGTTACCATAACTGAGT        | miRNA | miR-451  |
| t0036232 | 24 | 2 AAACCGTTACCATTACCGAGTTTA     | miRNA | miR-451  |
| t0036369 | 22 | 2 AAAACGTTACAATTACTGAGTT       | miRNA | miR-451  |
| t0036408 | 24 | 2 AAACCGTTACCATTACTGAGTTTC     | miRNA | miR-451  |
| t0036470 | 26 | 2 GAACCGTTACCATTACTGAGTTTAGT   | miRNA | miR-451  |
| t0036536 | 23 | 2 AAACCGTTCCCATTACTGAGTTT      | miRNA | miR-451  |
| t0036563 | 19 | 2 AAACCGTTAGCATTACTGA          | miRNA | miR-451  |
| t0036575 | 21 | 2 AAACCGTTACCATTATTAAGT        | miRNA | miR-451  |
| t0036644 | 24 | 2 AAACCGTTGCCATTACTGAGTTTA     | miRNA | miR-451  |
| t0036657 | 22 | 2 AAACCGATACCATTATTGAGTT       | miRNA | miR-451  |
| t0036673 | 22 | 2 AAACATTACCATTACTGAGTTT       | miRNA | miR-451  |
| t0036679 | 24 | 2 AAATCGTTACCATTACTGAGTTTA     | miRNA | miR-451  |
| t0036725 | 25 | 2 AAACGTTACCATTACTGAGTTTAG     | miRNA | miR-451  |
| t0036773 | 24 | 2 AAACCGTTACCATTACAGAGTTTA     | miRNA | miR-451  |
| t0036780 | 21 | 2 AAACCGTTACCAGTACTGAGT        | miRNA | miR-451  |



|          |    |                               |       |          |
|----------|----|-------------------------------|-------|----------|
| t0036808 | 25 | 2 AAGCCGTTACCATTACTGAGTTTAG   | miRNA | miR-451  |
| t0036860 | 21 | 2 AAACCTTTACCATTACTGAGA       | miRNA | miR-451  |
| t0036998 | 26 | 2 AAACCGTTACCATTACTGCGTTTAGT  | miRNA | miR-451  |
| t0037121 | 19 | 2 AGACCGTTACCATTACTGA         | miRNA | miR-451  |
| t0037164 | 23 | 2 AAACCTTTACAATTACTGAGTTT     | miRNA | miR-451  |
| t0037167 | 24 | 2 AAACCGTTACCATCACTGAGTTTA    | miRNA | miR-451  |
| t0037236 | 20 | 2 AAACCGTTCCATTACTGAG         | miRNA | miR-451  |
| t0037265 | 22 | 2 AAACTGTTACCATTATTGAGTT      | miRNA | miR-451  |
| t0037273 | 25 | 2 AAACCGATAACCATTACTGAGTTTAG  | miRNA | miR-451  |
| t0037375 | 21 | 2 AAACCGTTACCCTTACTGCGT       | miRNA | miR-451  |
| t0037379 | 23 | 2 AAACCGTTACCATAACTGAGTTT     | miRNA | miR-451  |
| t0037389 | 20 | 2 AAACCGTTAACATTAATGAG        | miRNA | miR-451  |
| t0037468 | 23 | 2 AAACCTTTAGCATTACTGAGTTT     | miRNA | miR-451  |
| t0037506 | 23 | 2 AAACCGTTACCATTACTGAGTGT     | miRNA | miR-451  |
| t0037507 | 21 | 2 AAACCTTTACCATTACTGCGT       | miRNA | miR-451  |
| t0037571 | 22 | 2 AAACCTTACCATTACTGAGAT       | miRNA | miR-451  |
| t0037609 | 19 | 2 AAACCGTTACCATTGCTGA         | miRNA | miR-451  |
| t0037653 | 25 | 2 AAACCGTTACCATTACTGGGTTTAA   | miRNA | miR-451  |
| t0037670 | 26 | 2 AAACCATTACCATTACTGAGTTTAGT  | miRNA | miR-451  |
| t0037675 | 24 | 2 AAACCGTTACCATTACTGAGTCTA    | miRNA | miR-451  |
| t0037845 | 23 | 2 AAACCGTTACCAGTACTGAGTTT     | miRNA | miR-451  |
| t0037882 | 26 | 2 AAACCGTTACCATTAATGAGTTTAGT  | miRNA | miR-451  |
| t0038029 | 26 | 2 AAACCGTTACCATTACCGAGTTTAGT  | miRNA | miR-451  |
| t0038056 | 22 | 2 AAACAGTTACCATTACTCAGTT      | miRNA | miR-451  |
| t0038131 | 22 | 2 AAACCTTTACCATTACTGCGTT      | miRNA | miR-451  |
| t0038166 | 25 | 2 AAACCGTTACCCTTACTGAGTTTAG   | miRNA | miR-451  |
| t0038206 | 19 | 2 AAACCGTTATTATTACTGA         | miRNA | miR-451  |
| t0038253 | 21 | 2 AAACCGTCACCATTATTGAGT       | miRNA | miR-451  |
| t0038281 | 21 | 2 AAACCGTTAACATTAATGAGT       | miRNA | miR-451  |
| t0038297 | 21 | 2 AAACAGTTAACATTACTGAGT       | miRNA | miR-451  |
| t0038314 | 23 | 2 AAACCGTTACCATTACTGAGTCA     | miRNA | miR-451  |
| t0038379 | 25 | 2 AAACCGTTACCATTGCTGAGTTTAG   | miRNA | miR-451  |
| t0038498 | 24 | 2 GAACCGTTACCATTACTGAGTTTA    | miRNA | miR-451  |
| t0038525 | 21 | 2 AAAAAGTTACCATTACTGAGT       | miRNA | miR-451  |
| t0038537 | 22 | 2 AAACAGTTACCATTAATGAGTT      | miRNA | miR-451  |
| t0038734 | 22 | 2 AAACCGTTAACATTACTCAGTT      | miRNA | miR-451  |
| t0038793 | 21 | 2 AAACCGTTACCATTATTGAGC       | miRNA | miR-451  |
| t0038857 | 19 | 2 AAACCGTTACCATTATTGA         | miRNA | miR-451  |
| t0038872 | 25 | 2 AAACCGTTACCATTAATGAGTTTAG   | miRNA | miR-451  |
| t0038940 | 20 | 2 AAACCGTTACAATTAATGAG        | miRNA | miR-451  |
| t0038954 | 27 | 2 AAAAAAACCGTTACCATTACTGAGTTT | miRNA | miR-451  |
| t0039005 | 21 | 2 AAACCTTTACCATTAATGAGT       | miRNA | miR-451  |
| t0039162 | 20 | 2 ATACCGTTACCATTACTGAG        | miRNA | miR-451  |
| t0039165 | 22 | 2 AACCGTTACCATTACTGAGGTT      | miRNA | miR-451  |
| t0039195 | 24 | 2 AAACCGTTACCATTACTGAGCTTA    | miRNA | miR-451  |
| t0039275 | 25 | 2 AAACCGTCACCATTACTGAGTTTAG   | miRNA | miR-451  |
| t0039403 | 20 | 2 AATCCGTTACCATTACTGAG        | miRNA | miR-451  |
| t0039415 | 20 | 2 AAACCGTTACCAGTACTGAG        | miRNA | miR-451  |
| t0039520 | 21 | 2 AAACCGTTGCCATTATTGAGT       | miRNA | miR-451  |
| t0039614 | 23 | 2 AACCCGTTACCATTACTGAGTTT     | miRNA | miR-451  |
| t0039681 | 21 | 2 ATACCGTTACCATTACTGAGT       | miRNA | miR-451  |
| t0039719 | 19 | 2 AAACCGTTGCCATTACTGA         | miRNA | miR-451  |
| t0039730 | 26 | 2 AAACCGTTACCATTACTGTGTTTAGT  | miRNA | miR-451  |
| t0039809 | 22 | 2 AAACCGTTACCAGTACTGAGTT      | miRNA | miR-451  |
| t0039897 | 23 | 2 AAACCGTTAACATTACTGAGTAA     | miRNA | miR-451  |
| t0039952 | 23 | 2 TTCGGGGTCTGGGCGCGGCGAGG     | miRNA | miR-4508 |
| t0040027 | 22 | 2 TTCGGGGTCTGGGCGCGGCGCT      | miRNA | miR-4508 |
| t0040029 | 20 | 2 TTCGGGGGCTGGGCGCGGCG        | miRNA | miR-4508 |

|          |    |                            |       |            |
|----------|----|----------------------------|-------|------------|
| t0040196 | 20 | 2 TTCGGGGTCTGGGAGCGGCG     | miRNA | miR-4508   |
| t0040238 | 20 | 2 GGCACGGGCTGGGCGAGGCT     | miRNA | miR-4486   |
| t0040246 | 21 | 2 GGGTGCGGGGCCGGCGGGGTTT   | miRNA | miR-4466   |
| t0040278 | 19 | 2 GGGTGCGGGGCCGGCGGGGG     | miRNA | miR-4466   |
| t0040311 | 22 | 2 TCAAATCCGAGTCACGGCACCA   | miRNA | miR-4454   |
| t0040432 | 22 | 2 AGTAGCATTGTACAGGGCTATT   | miRNA | miR-4289   |
| t0040508 | 21 | 2 AGAAGCATTGTACAGGGTTAT    | miRNA | miR-4289   |
| t0040519 | 22 | 2 AGCGGCATTGTACAGGGCTATT   | miRNA | miR-4289   |
| t0040577 | 21 | 2 AGAAGCATTGTACAGGGATAT    | miRNA | miR-4289   |
| t0040595 | 20 | 2 CGCAGCATTGTACAGGGCTA     | miRNA | miR-4289   |
| t0035647 | 20 | 2 AGAAGCATTGGACAGGGCTA     | miRNA | miR-4289   |
| t0035778 | 20 | 2 AGAAGCATTGTACAGGGTTA     | miRNA | miR-4289   |
| t0039233 | 18 | 2 AGAAGCATTGTACAGGGC       | miRNA | miR-4289   |
| t0040128 | 22 | 2 ATGACACGATCACTCCC GTTGC  | miRNA | miR-425-5p |
| t0038148 | 21 | 2 AAGCAGCAATTCATGTTTTGA    | miRNA | miR-424    |
| t0035369 | 21 | 2 CGGCAGCAATTCATGTTTTGA    | miRNA | miR-424    |
| t0035519 | 20 | 2 CAGCAGCGATTCATGTTTTG     | miRNA | miR-424    |
| t0038388 | 20 | 2 CAGCAGCAATTCATGTTTTC     | miRNA | miR-424    |
| t0037022 | 23 | 2 TGAGGGGCAGAGGGCGAGGCTTT  | miRNA | miR-423-5p |
| t0037232 | 21 | 2 TGAGGGGCAGAGAGAGAGATT    | miRNA | miR-423-5p |
| t0037995 | 20 | 2 TGAGGGGCAGAAAGCGAGAC     | miRNA | miR-423-5p |
| t0038302 | 22 | 2 TGAGTGGCAGAGAGCGAGAATT   | miRNA | miR-423-5p |
| t0038998 | 19 | 2 CGAGGGGCAGAGAGCGAGA      | miRNA | miR-423-5p |
| t0039124 | 23 | 2 TGAGGGGCAGAGAGCGGGACTAT  | miRNA | miR-423-5p |
| t0039175 | 21 | 2 TGAGGGGCAGAGAGAAAGACT    | miRNA | miR-423-5p |
| t0040330 | 23 | 2 TGAGGGGCAGAGCGCGAGAATTT  | miRNA | miR-423-5p |
| t0039402 | 21 | 2 TGAGGGGCAGAGAGCAAGATT    | miRNA | miR-423-5p |
| t0038054 | 23 | 2 TGAGGGGCAGACAGCGAGAATTT  | miRNA | miR-423-5p |
| t0038487 | 23 | 2 TGAGGGGCAGAGAACGAGACTTG  | miRNA | miR-423-5p |
| t0039690 | 19 | 2 TGAGGGGCAAAGAGCGAGA      | miRNA | miR-423-5p |
| t0039966 | 24 | 2 TGAGGGGCAGAGAGCGAGACTTCT | miRNA | miR-423-5p |
| t0035261 | 23 | 2 TGAGGGGGAGAGAGCGAGAATTT  | miRNA | miR-423-5p |
| t0035469 | 23 | 2 TGAGAGGCAGAGAGCGAGAATTT  | miRNA | miR-423-5p |
| t0035489 | 21 | 2 TGAGCGGCAGAGAGCGAGCCT    | miRNA | miR-423-5p |
| t0035564 | 20 | 2 TGAGGGGCAGAGGGCGAGAC     | miRNA | miR-423-5p |
| t0035601 | 23 | 2 TGAGGGGCAGAGAGCGCAATTT   | miRNA | miR-423-5p |
| t0035652 | 24 | 2 TGATGGGCAGAGAGCGAGACTTTT | miRNA | miR-423-5p |
| t0035663 | 24 | 2 TGAGGGGCAGAGAGCGAGACTCTA | miRNA | miR-423-5p |
| t0035748 | 21 | 2 TGGGGGCAGAGAGCGAGACTT    | miRNA | miR-423-5p |
| t0035833 | 24 | 2 TGAGGGGCAGAGAGCGAGACTTTC | miRNA | miR-423-5p |
| t0035902 | 24 | 2 TGAGGGGCAGAGAGCGGGACTTTA | miRNA | miR-423-5p |
| t0036102 | 23 | 2 AGAGGGGCAGAGAGCGAGAATTT  | miRNA | miR-423-5p |
| t0036181 | 24 | 2 TGAGGGGCAGAGAGCGGGACTTAA | miRNA | miR-423-5p |
| t0036191 | 19 | 2 TGTGGGGCAGAGAGCGAGA      | miRNA | miR-423-5p |
| t0036309 | 23 | 2 TGAGGGGCAGAGAGCGAGCTTTT  | miRNA | miR-423-5p |
| t0036419 | 19 | 2 TGAGGGGCAGAGAGTGAGA      | miRNA | miR-423-5p |
| t0036546 | 23 | 2 TGCGGGGCAGAGAGAGAGACTTT  | miRNA | miR-423-5p |
| t0036728 | 24 | 2 TGAGGGGCAGAGAGCGAGGCTTAA | miRNA | miR-423-5p |
| t0036783 | 21 | 2 TGAGGGGCAGAGAGCGCGAAT    | miRNA | miR-423-5p |
| t0036835 | 21 | 2 TGAGGGGCAGAGAGCGAGGCG    | miRNA | miR-423-5p |
| t0036940 | 23 | 2 TGAGGGGCAGCGCGAGACTTT    | miRNA | miR-423-5p |
| t0036997 | 23 | 2 TGAGGTGCAGAGAGAGAGACTTT  | miRNA | miR-423-5p |
| t0037006 | 24 | 2 GGAGGGGCAGAGAGCGAGACTTTT | miRNA | miR-423-5p |
| t0037024 | 23 | 2 TGAGGGGCAGAGAGCGAGACCTA  | miRNA | miR-423-5p |
| t0037177 | 23 | 2 TGAGGGGTAGAGAGCGAGAATTT  | miRNA | miR-423-5p |
| t0037180 | 20 | 2 AGAGGGGCAGAGAGCGAGAC     | miRNA | miR-423-5p |
| t0037203 | 24 | 2 TGAGGGGCAGAGAACGAGACTTTT | miRNA | miR-423-5p |
| t0037206 | 21 | 2 TGAGGGGCAGAGATCGGGACT    | miRNA | miR-423-5p |

|          |    |                                |       |              |
|----------|----|--------------------------------|-------|--------------|
| t0037543 | 21 | 2 TGAGGGGTAGAGAGCGAGAAT        | miRNA | miR-423-5p   |
| t0037561 | 20 | 2 TGAGGGGCAGGGAGCGAGAC         | miRNA | miR-423-5p   |
| t0037666 | 20 | 2 TGAGGGGCAGAGAGCAAGAC         | miRNA | miR-423-5p   |
| t0037699 | 19 | 2 TGAGGGGCAGCGAGCGAGA          | miRNA | miR-423-5p   |
| t0037721 | 24 | 2 TGAGGGGCGGAGAGCGAGACTTTA     | miRNA | miR-423-5p   |
| t0037768 | 23 | 2 TGAGGGGCAGAGAGCCAGACTTA      | miRNA | miR-423-5p   |
| t0037898 | 21 | 2 TGAGGGGCAGAGAGCGAGCCA        | miRNA | miR-423-5p   |
| t0037956 | 24 | 2 TGAGGGGCAGAGAGCGAGAATTTA     | miRNA | miR-423-5p   |
| t0037969 | 19 | 2 TGAGGAGCAGAGAGCGAGA          | miRNA | miR-423-5p   |
| t0038014 | 23 | 2 TGAGGGGCAGAGAGAGAGGCTTT      | miRNA | miR-423-5p   |
| t0038123 | 23 | 2 TGAGGGGCAGAGGGAGAGACTTT      | miRNA | miR-423-5p   |
| t0038132 | 23 | 2 TGAGGGGCAGCGAGCGAGAATTT      | miRNA | miR-423-5p   |
| t0038194 | 24 | 2 TGAGGGGAAGAGAGCGAGAATTTT     | miRNA | miR-423-5p   |
| t0038315 | 24 | 2 TGAGGGGCAGATAGCGAGACTTTA     | miRNA | miR-423-5p   |
| t0038365 | 20 | 2 TGAGGGGCAAAGAGCGAGAC         | miRNA | miR-423-5p   |
| t0038503 | 21 | 2 TGAGGGGCAGAGCGCGGACT         | miRNA | miR-423-5p   |
| t0038554 | 24 | 2 TGAGGGGCAGAGAGCGAGAATTA      | miRNA | miR-423-5p   |
| t0038724 | 23 | 2 TGAGGGGTAGAGAGTGAGACTTT      | miRNA | miR-423-5p   |
| t0038748 | 20 | 2 TGAGGGGCAGAGAGCGACAC         | miRNA | miR-423-5p   |
| t0038885 | 21 | 2 TGAGGGGCAGAGAGCGAGCAT        | miRNA | miR-423-5p   |
| t0038929 | 19 | 2 TGAGGGGGAGAGAGCGAGA          | miRNA | miR-423-5p   |
| t0039196 | 24 | 2 TGAGGGGTAGAGAGCGAGACTTTT     | miRNA | miR-423-5p   |
| t0039263 | 24 | 2 TGAGGGGCAGAAAGCGAGACTTTA     | miRNA | miR-423-5p   |
| t0039380 | 21 | 2 TGAGGGGCAGAGCGCGAGATT        | miRNA | miR-423-5p   |
| t0039388 | 22 | 2 TGAGGGGCAGAGAGAGAGTCTT       | miRNA | miR-423-5p   |
| t0039416 | 24 | 2 TGAGGGGCAGAGAGAGAGAATTTT     | miRNA | miR-423-5p   |
| t0039440 | 23 | 2 TGAGAGGCAGAGAGCGAGATTTT      | miRNA | miR-423-5p   |
| t0039472 | 23 | 2 TGAGGGGCAGAGAACGAGCCTTT      | miRNA | miR-423-5p   |
| t0039515 | 23 | 2 TGAGGGGCAGAGTGCAGACTTA       | miRNA | miR-423-5p   |
| t0039528 | 23 | 2 TGAGGGGCAGAGAGCGAAAATTT      | miRNA | miR-423-5p   |
| t0039644 | 22 | 2 TGAGGGGCAGAGAGAGGGACTT       | miRNA | miR-423-5p   |
| t0039679 | 21 | 2 TGAGGTGCAGAGAGCGAGACA        | miRNA | miR-423-5p   |
| t0039778 | 24 | 2 TGAGGTGCAGAGAGCGAGACTTTA     | miRNA | miR-423-5p   |
| t0039797 | 24 | 2 TGAGGGGCAGAGAACGAGACTTAA     | miRNA | miR-423-5p   |
| t0039830 | 23 | 2 TGAGGGGCAGCGAGCGAGACTTA      | miRNA | miR-423-5p   |
| t0039838 | 23 | 2 TGAGGGGCAGAGAGCCAGAATTT      | miRNA | miR-423-5p   |
| t0039866 | 23 | 2 TGAGGGGCAGAGAGTAAGACTTT      | miRNA | miR-423-5p   |
| t0039930 | 21 | 2 TGAGGGGCAGATAGAGAGACT        | miRNA | miR-423-5p   |
| t0039948 | 21 | 2 TGAGGGGCAGAGAGAGAGGCT        | miRNA | miR-423-5p   |
| t0039985 | 24 | 2 TGAGGGGCAGAGAGCGGACTTTT      | miRNA | miR-423-5p   |
| t0039995 | 18 | 2 CGAGGGGCAGAGAGCGAG           | miRNA | miR-423-5p   |
| t0040081 | 22 | 2 CTGGACTTAGAGTCAGAAGGCA       | miRNA | miR-422a     |
| t0040116 | 23 | 2 TGGAACTCTGATATTGGCAGGGA      | miRNA | miR-4001g-3p |
| t0040172 | 22 | 2 TGGACTCGCAGGAACAGGCCTT       | miRNA | miR-4001b-5p |
| t0040179 | 21 | 2 TGGACTCGCAGGAACAGGCCA        | miRNA | miR-4001b-5p |
| t0040224 | 30 | 2 AGAACTGAAACGGACAAGGGGAATCCGA | miRNA | miR-3896-3p  |
| t0040266 | 26 | 2 GAGCCGGCGGCGGCGCCAATAGAGC    | miRNA | miR-3885-5p  |
| t0040387 | 23 | 2 CGGCGGGGGCGGGGTGGGCGGC       | miRNA | miR-3885-5p  |
| t0040409 | 20 | 2 GCGGCGGCGTTCGGCGGCGG         | miRNA | miR-3885-5p  |
| t0040440 | 25 | 2 CGGCGGCGGCGACTCTGGACGAGAG    | miRNA | miR-3885-5p  |
| t0040441 | 20 | 2 GCGGCGTTCGGCGGCGGCGG         | miRNA | miR-3885-5p  |
| t0040539 | 19 | 2 GCGGCGGCGGCGGGGGGG           | miRNA | miR-3885-5p  |
| t0040556 | 25 | 2 GGGGCCGCGGCGGCGGCGACTCTG     | miRNA | miR-3885-5p  |
| t0040575 | 22 | 2 TCGGGCGGCGGCGGCGGCGGA        | miRNA | miR-3885-5p  |
| t0036454 | 21 | 2 CGGCGGCGGCGGGGCGGCGG         | miRNA | miR-3885-5p  |
| t0036258 | 23 | 2 TCGGGCGGCGGCGGCGGTGGCG       | miRNA | miR-3885-5p  |
| t0036453 | 22 | 2 CGGCGGCGTTCGGCGGCGGCGG       | miRNA | miR-3885-5p  |
| t0038031 | 26 | 2 GGAGGGCGGCGGCGGCGGGGGG       | miRNA | miR-3885-5p  |

|          |    |                                |       |            |
|----------|----|--------------------------------|-------|------------|
| t0040071 | 24 | 2 TGGTAGACTATGGAACGGAGGATC     | miRNA | miR-379-5p |
| t0035907 | 21 | 2 ACTGGACTTGGAGGCAGAAGG        | miRNA | miR-378f   |
| t0036294 | 23 | 2 ACTGGACTTGGAGTCAGAAGGGT      | miRNA | miR-378f   |
| t0036434 | 23 | 2 ACTGGACTTGGAGCCAGAAGGCG      | miRNA | miR-378f   |
| t0036513 | 23 | 2 ACTGGACTTGGAGTCAGAAGGAG      | miRNA | miR-378c   |
| t0036869 | 22 | 2 CTGGACTTGGAGTCAGAAGGAA       | miRNA | miR-378c   |
| t0037292 | 22 | 2 TTGGACTTGGAGTCAGAAGGAA       | miRNA | miR-378b   |
| t0037927 | 23 | 2 ACTGGACTTGGAGTCAGAAGCCA      | miRNA | miR-378    |
| t0039039 | 23 | 2 ACTGGACTTGGAGTCAGAAGTCA      | miRNA | miR-378    |
| t0039566 | 25 | 2 ACTGGGCTTGGAGTCAGAAGGCATC    | miRNA | miR-378    |
| t0039779 | 21 | 2 ACTGGACTTGGAGTAAGAAGG        | miRNA | miR-378    |
| t0040307 | 22 | 2 ACTGGACTTGGAGTCAGCAGGC       | miRNA | miR-378    |
| t0040510 | 21 | 2 ACTGGACTTGGAGTCAAAGG         | miRNA | miR-378    |
| t0036184 | 25 | 2 ACTGGACTTGGAGTCAGACGGCATC    | miRNA | miR-378    |
| t0036213 | 25 | 2 ACTGGACTTGGAGTCAGAAGGCATA    | miRNA | miR-378    |
| t0037104 | 28 | 2 ACTGTACTTGGAGTCAGAAGGCTATATC | miRNA | miR-378    |
| t0038006 | 23 | 2 ACTGGACTTGGAGTCAGCAGGCG      | miRNA | miR-378    |
| t0035273 | 23 | 2 AATGGACTTGGAGTCAGAAGGCA      | miRNA | miR-378    |
| t0037913 | 23 | 2 ACTGGACTTGGAGTCACAAGGCA      | miRNA | miR-378    |
| t0035556 | 26 | 2 CTGGACTTGGAGTCAGAAGGCATATC   | miRNA | miR-378    |
| t0035234 | 22 | 2 ATATAATACAACCTGCTAGGTG       | miRNA | miR-374    |
| t0035382 | 22 | 2 ATATAATACAACCTGCTAAGTG       | miRNA | miR-374    |
| t0036050 | 22 | 2 ATATAATACAACCTGCTGAGTG       | miRNA | miR-374    |
| t0037314 | 20 | 2 ATATAATACAACCTGATAAG         | miRNA | miR-374    |
| t0037903 | 22 | 2 ATATAATAAACCTGCTAAGTG        | miRNA | miR-374    |
| t0038258 | 22 | 2 ATATAATACAACCTGCTAAGCG       | miRNA | miR-374    |
| t0038267 | 21 | 2 AGGGACTTTCAGGGGCAGATG        | miRNA | miR-365*   |
| t0039353 | 19 | 2 AATTGTACGGTATCCATCT          | miRNA | miR-363    |
| t0039713 | 22 | 2 AATTGCATGGTATCCATCTGTA       | miRNA | miR-363    |
| t0039907 | 22 | 2 AATTGCACGGAATCCATCTGTA       | miRNA | miR-363    |
| t0040084 | 22 | 2 TCTCTCGGCTCCTCGCGCTTT        | miRNA | miR-3615   |
| t0040272 | 25 | 2 TTGAAGACTGAAGGGGAGAAGGGTT    | miRNA | miR-3526   |
| t0040549 | 26 | 2 AACTTTGAAGACTGAAGTGGAGCAGG   | miRNA | miR-3526   |
| t0037084 | 27 | 2 AACTTTGTAGACTGAAGTGGAGAAGGG  | miRNA | miR-3526   |
| t0037940 | 25 | 2 TTGAAGACCGAAGTGGAGAAGGGTT    | miRNA | miR-3526   |
| t0039889 | 29 | 2 AACTTTAAAGACTGAAGTGGAGAAGGGT | miRNA | miR-3526   |
| t0040158 | 22 | 2 TGAAGACTGAAGTGGAGCAGGG       | miRNA | miR-3526   |
| t0040325 | 27 | 2 AACTCTGAAGACTGAAGTGGAGAAGGG  | miRNA | miR-3526   |
| t0040585 | 24 | 2 TGAAGACTGAAGCGGAGAAGGGTT     | miRNA | miR-3526   |
| t0040234 | 28 | 2 AACCTTGAAGACTGAAGTGGAGAAGGGT | miRNA | miR-3526   |
| t0036284 | 28 | 2 AACTTTCAAGACTGAAGTGGAGAAGGGT | miRNA | miR-3526   |
| t0036901 | 30 | 2 AACTTTGAAGACTGAAGGGGAGAAGGGT | miRNA | miR-3526   |
| t0040487 | 20 | 2 AACTTTGAAGACTGAAGGGG         | miRNA | miR-3526   |
| t0039394 | 22 | 2 AACTTTGAAGACTGAAGCGGAG       | miRNA | miR-3526   |
| t0035367 | 20 | 2 AACTTTGAAGGCCGAAGTGG         | miRNA | miR-3526   |
| t0035372 | 22 | 2 AACTTTGAAGACTGAAGTGGCG       | miRNA | miR-3526   |
| t0035392 | 24 | 2 CTTTGAAGACTGAAGTGGAGCAGG     | miRNA | miR-3526   |
| t0035639 | 28 | 2 AACTTTGAAGACTGTAGTGGAGAAGGGT | miRNA | miR-3526   |
| t0035831 | 27 | 2 TGAAGACTGAAGGGGAGAAGGGTTTCT  | miRNA | miR-3526   |
| t0036260 | 28 | 2 AACTTTGAAGACTGAAGTGAAGAAGGGT | miRNA | miR-3526   |
| t0036311 | 27 | 2 AACTTTGGAGACTGAAGTGGAGAAGGG  | miRNA | miR-3526   |
| t0036474 | 24 | 2 CTTGAAGACTGAAGTGGCCAAGGG     | miRNA | miR-3526   |
| t0036492 | 26 | 2 AACTTTGAAGACTGAAGCGGAGAAGG   | miRNA | miR-3526   |
| t0036552 | 28 | 2 GACTTTGAAGACTGAAGTGGAGAAGGGT | miRNA | miR-3526   |
| t0036738 | 28 | 2 AACTTTGAAGACTGAAGTGGACAAGGGT | miRNA | miR-3526   |
| t0036975 | 30 | 2 AACTTTGAAGACTGAAGTGGAGAAGGGG | miRNA | miR-3526   |
| t0037071 | 27 | 2 AACCTTGAAGACTGAAGTGGAGAAGGG  | miRNA | miR-3526   |
| t0037204 | 28 | 2 AACTTTGAAGACTGGAGTGGAGAAGGGT | miRNA | miR-3526   |

|          |    |                                |       |            |
|----------|----|--------------------------------|-------|------------|
| t0037238 | 24 | 2 TGAAGACTAAAGTGGAGAAGGGTT     | miRNA | miR-3526   |
| t0037305 | 26 | 2 TGAAGACTGAAGTGGAGAAGGGGTT    | miRNA | miR-3526   |
| t0037625 | 28 | 2 AACTTTGAAGACTGCAGTGGAGAAGGGT | miRNA | miR-3526   |
| t0037735 | 23 | 2 TGAAGACTGAAGTGGAGACGGGT      | miRNA | miR-3526   |
| t0037936 | 24 | 2 TGAAGACTGAAGTGGAGCAGGGTT     | miRNA | miR-3526   |
| t0038139 | 25 | 2 TGAAGACTGAAGTGGAGAAGGGATT    | miRNA | miR-3526   |
| t0038161 | 24 | 2 TTGAAGACTGAAGTGGGGAAGGGT     | miRNA | miR-3526   |
| t0038180 | 27 | 2 AACTTTGAAGACTGAAGTAGAGAAGGG  | miRNA | miR-3526   |
| t0038420 | 25 | 2 TGAAGACTGAAGCGGAGAAGGGTTT    | miRNA | miR-3526   |
| t0038508 | 24 | 2 TTGAAGACTGAAGCGGAGAAGGGT     | miRNA | miR-3526   |
| t0038759 | 20 | 2 TGAAGACTGAAGGGGAGAAG         | miRNA | miR-3526   |
| t0038819 | 26 | 2 TTGAAGACTGAAGTGGAGAAGGGGTT   | miRNA | miR-3526   |
| t0038889 | 23 | 2 AGTAGAATCCAGGACGCGCGTTT      | miRNA | miR-3503   |
| t0038916 | 21 | 2 AGTGAATCCAGGACGCGCGT         | miRNA | miR-3503   |
| t0038978 | 21 | 2 AGGAGATCGGTAGTAGATTGT        | miRNA | miR-3500   |
| t0039266 | 21 | 2 AGGAGATCGGTGGTAGATTGT        | miRNA | miR-3500   |
| t0039516 | 21 | 2 TCAAAATCGTTGGCAATGGCT        | miRNA | miR-3495   |
| t0039536 | 22 | 2 GATAGAAGACTGCCGCTCGTTT       | miRNA | miR-3494   |
| t0039565 | 21 | 2 ATAGAAGACTGCCGCTCGTTT        | miRNA | miR-3494   |
| t0039917 | 21 | 2 TCGATAGAAGACTGCCGCTCT        | miRNA | miR-3494   |
| t0040077 | 20 | 2 TGCAGAAATTCGTCAGACA          | miRNA | miR-3492   |
| t0040197 | 22 | 2 TCCGTGCTGAGATTCGTCATT        | miRNA | miR-3492   |
| t0040362 | 20 | 2 CCTCGAACTGTTGTGGCCAT         | miRNA | miR-3487   |
| t0040376 | 21 | 2 TCCTCGAACTGTTGTGGCCAA        | miRNA | miR-3487   |
| t0040576 | 25 | 2 TCTCACACAGAAATCGCACCCGGAT    | miRNA | miR-342-3p |
| t0038925 | 22 | 2 TCTCACACAGAAATCGCACCCG       | miRNA | miR-342-3p |
| t0039789 | 22 | 2 TCTCGCACAGAAATCGCACCCG       | miRNA | miR-342-3p |
| t0036721 | 23 | 2 TCTCACACAGAAATCGCACCCGC      | miRNA | miR-342-3p |
| t0039855 | 25 | 2 TCTCACACAGAAATCGCACCCGGCA    | miRNA | miR-342-3p |
| t0040253 | 24 | 2 TCTCACACAGAAATCGCCCCCGTC     | miRNA | miR-342-3p |
| t0037237 | 24 | 2 TCTCACACAGAAATCGCAACCGTC     | miRNA | miR-342-3p |
| t0039478 | 25 | 2 TCTCACACAGAAATAGCACCCGTCT    | miRNA | miR-342-3p |
| t0040005 | 23 | 2 TCTTACACAGAAATCGCACCCGT      | miRNA | miR-342-3p |
| t0035739 | 23 | 2 TCTCAGACAGAAATCGCACCCGT      | miRNA | miR-342-3p |
| t0039133 | 23 | 2 TCACACACAGAAATCGCACCCGT      | miRNA | miR-342-3p |
| t0035309 | 23 | 2 TCTCACACAGAAATCGCACACGT      | miRNA | miR-342-3p |
| t0039329 | 23 | 2 TCTCACATAGAAATCGCACCCGT      | miRNA | miR-342-3p |
| t0035792 | 23 | 2 ACTCACACAGAAATCGCACCCGT      | miRNA | miR-342-3p |
| t0035808 | 22 | 2 TCTCACACAGGAATCGCACCCG       | miRNA | miR-342-3p |
| t0036244 | 22 | 2 TCTCACACAGAAATCGAACCCAG      | miRNA | miR-342-3p |
| t0036881 | 22 | 2 TCTCAAACAGAAATCGCACCCG       | miRNA | miR-342-3p |
| t0037023 | 22 | 2 TTATAAAGCAATGAGACTGCTT       | miRNA | miR-340-5p |
| t0037171 | 21 | 2 TTATAAAGCAATGAGAATGAT        | miRNA | miR-340-5p |
| t0037234 | 21 | 2 TTATAAAGCAATGTGACTGAT        | miRNA | miR-340-5p |
| t0037249 | 24 | 2 CAGCAGCAATTCATGTTTTGGATC     | miRNA | miR-322    |
| t0037600 | 21 | 2 AAGACTGAAGTGGAGAAGGGA        | miRNA | miR-320e   |
| t0037688 | 22 | 2 AAGACTGAAGTGGAGAAGGGGT       | miRNA | miR-320e   |
| t0037910 | 22 | 2 TAAAGCTGGGTTGAGAGGGCGT       | miRNA | miR-320d   |
| t0038342 | 23 | 2 TAAAGCTGGGTTGAGAGGGCGTA      | miRNA | miR-320d   |
| t0039025 | 22 | 2 AAAGCTGGGTTGAGAGGGCGGA       | miRNA | miR-320d   |
| t0039676 | 22 | 2 AAAAGCTGGTTTGAGAGGGCGC       | miRNA | miR-320d   |
| t0039963 | 23 | 2 AAAAGCTGGGTTGAGAGGACGTA      | miRNA | miR-320d   |
| t0040089 | 21 | 2 AAAAGATGGGTTGAGAGGGAG        | miRNA | miR-320d   |
| t0040428 | 23 | 2 AAAGGCTGGGTTGAGAGGGCGTA      | miRNA | miR-320d   |
| t0039217 | 24 | 2 AAAAGCTGGGTTGAGAGGGAGACA     | miRNA | miR-320d   |
| t0040274 | 23 | 2 AAAAGCTGGGTTGCGAGGGAGAA      | miRNA | miR-320d   |
| t0040636 | 22 | 2 AAAAGCTGGGTTGAGAGGGCTG       | miRNA | miR-320d   |
| t0038567 | 23 | 2 AAAAGCTGGGTCGAGAGGGCGTT      | miRNA | miR-320d   |

|          |    |                             |       |          |
|----------|----|-----------------------------|-------|----------|
| t0036143 | 22 | 2 AAAAGATGGGTTGAGAGGGCGG    | miRNA | miR-320d |
| t0039784 | 22 | 2 AAAAGCTCGGTTGAGAGGGCGT    | miRNA | miR-320d |
| t0035380 | 21 | 2 AAAGCTGGGTTGAGAGGGGGT     | miRNA | miR-320d |
| t0035437 | 23 | 2 AAAAGCTGGGTTGAGAGGGGAGAC  | miRNA | miR-320d |
| t0035513 | 23 | 2 AAAAGCTGGGTTGAGAGGGGAGCA  | miRNA | miR-320d |
| t0035825 | 21 | 2 AAAGCTGGGTTGAGAGGGCGG     | miRNA | miR-320d |
| t0035996 | 22 | 2 AAAGCTGGGATGAGAGGGCGTA    | miRNA | miR-320d |
| t0036113 | 23 | 2 AAAAGCTGGGTTGAGTGGGCGTT   | miRNA | miR-320d |
| t0036203 | 22 | 2 AAAAGTTGGGTTGAGAGGGGAGA   | miRNA | miR-320d |
| t0036267 | 22 | 2 AAAAGCTGGGTTGAAAGGGGAGA   | miRNA | miR-320d |
| t0036270 | 24 | 2 AAAAGCTGGGTTGAGAGGGCGCGA  | miRNA | miR-320d |
| t0036444 | 24 | 2 AAAAGCTGGGTTGAGAGGGGAGAAG | miRNA | miR-320d |
| t0036621 | 22 | 2 AAAGCTGGGTTGAGAGGGGAGAA   | miRNA | miR-320d |
| t0036667 | 21 | 2 AAAAGTTGGGTTGAGGGGCGA     | miRNA | miR-320d |
| t0036794 | 24 | 2 AAAAGCTGGGTTGAGAGGGCGCAG  | miRNA | miR-320d |
| t0036827 | 23 | 2 AAAAGCTGGGTTGAGAAGGCGTT   | miRNA | miR-320d |
| t0036937 | 23 | 2 AAAAGCTGGGTTGAGAGGGCTAG   | miRNA | miR-320d |
| t0036943 | 22 | 2 ATAAGCTGGGTTGAGAGGGCGT    | miRNA | miR-320d |
| t0036955 | 23 | 2 AAAAGCTGGATTGAGAGGGCGTT   | miRNA | miR-320d |
| t0037350 | 23 | 2 AAAAGCTGGGTTGAGATGGCGTA   | miRNA | miR-320d |
| t0037487 | 23 | 2 AAAAGCTGGGTTAAGAGGGCGTT   | miRNA | miR-320d |
| t0037582 | 22 | 2 AAAAGCTGAGTTGAGAGGGCAT    | miRNA | miR-320d |
| t0037588 | 22 | 2 AAAAGCTGGGTTGAGAGGGGAGC   | miRNA | miR-320d |
| t0037719 | 23 | 2 AAAAGCTGGGTTGAGAGGGCCAA   | miRNA | miR-320d |
| t0037965 | 22 | 2 AAAGCTGGGTTGAGAGGGGAGTA   | miRNA | miR-320d |
| t0038114 | 23 | 2 AAAAGCTGGGTTGTGAGGGCGTT   | miRNA | miR-320d |
| t0038122 | 23 | 2 AAAAGCTGGGTTGAGAGGGGAATT  | miRNA | miR-320d |
| t0038189 | 23 | 2 AAAAGGTGGGTTGAGAGGGCGTA   | miRNA | miR-320d |
| t0038328 | 22 | 2 AAAAGCAGGGTTGAGAGGGCGT    | miRNA | miR-320d |
| t0038437 | 23 | 2 AAAAGCTGGGTTGAGAGGGCGTA   | miRNA | miR-320d |
| t0038531 | 21 | 2 AAAAGCTGGGGTGAGAGGGCA     | miRNA | miR-320b |
| t0038714 | 21 | 2 AAAAGCTGGGTTGAGCGGGCA     | miRNA | miR-320b |
| t0038845 | 22 | 2 AAAAGCTGGGCTGAGAGGGCAA    | miRNA | miR-320b |
| t0038846 | 22 | 2 AAAAGCTGGGTTGAAAGGGCAA    | miRNA | miR-320b |
| t0038947 | 21 | 2 AAAAGCTGGGTTGAAAGGGCA     | miRNA | miR-320b |
| t0039066 | 21 | 2 AAAAGCTGAGTTGAGAGGGCG     | miRNA | miR-320a |
| t0039135 | 23 | 2 AAAAGCTGGCTTGAGAGGGCGAT   | miRNA | miR-320a |
| t0039366 | 21 | 2 AAAAGCTGGGTTGAGACGGCG     | miRNA | miR-320a |
| t0039457 | 21 | 2 AAAGCTGGGTTGAGCGGGCGA     | miRNA | miR-320a |
| t0039806 | 23 | 2 AAAAGCAGGGTTGAGAGGGCGAA   | miRNA | miR-320a |
| t0040061 | 23 | 2 AAAATCTGGGTTGAGAGGGCGAA   | miRNA | miR-320a |
| t0040225 | 21 | 2 AAAAGCTGGGTTGAGAAGGCG     | miRNA | miR-320a |
| t0040268 | 23 | 2 AAAAGCTGGGTTAAGAGGGCGAG   | miRNA | miR-320a |
| t0035701 | 21 | 2 AAAGATGGGTTGAGAGGGCGA     | miRNA | miR-320a |
| t0039318 | 21 | 2 AAAAGCTGGGTTGAGAGAGCG     | miRNA | miR-320a |
| t0039375 | 20 | 2 AAAGCTGGGTTGAGAAGGCG      | miRNA | miR-320a |
| t0040105 | 23 | 2 AAAAGATGGGTTGAGAGGGCGAG   | miRNA | miR-320a |
| t0040424 | 23 | 2 AAACGCTGGGTTGAGAGGGCGAT   | miRNA | miR-320a |
| t0035737 | 23 | 2 AAAAGCTGGGTTGAAAGGGCGAG   | miRNA | miR-320a |
| t0035762 | 22 | 2 AAAGCTGGGTTGAGAGGGCGAC    | miRNA | miR-320a |
| t0035882 | 21 | 2 AAAAGCTGGGTTGCGAGGGCG     | miRNA | miR-320a |
| t0035990 | 23 | 2 AAAAGCTGGGTTGACAGGGCGAA   | miRNA | miR-320a |
| t0036195 | 22 | 2 AAAAGCTGGGTTGATAGGGCGA    | miRNA | miR-320a |
| t0036248 | 23 | 2 AAAAGGTGGGTTGAGAGGGCGAT   | miRNA | miR-320a |
| t0036397 | 23 | 2 AAAAGCTGGGTTGATAGGGCGAA   | miRNA | miR-320a |
| t0036515 | 20 | 2 AAGGCTGGGTTGAGAGGGCG      | miRNA | miR-320a |
| t0036600 | 23 | 2 AAAAGCGGGGTTGAGAGGGCGAT   | miRNA | miR-320a |
| t0036849 | 21 | 2 ACAAGCTGGGTTGAGAGGGCG     | miRNA | miR-320a |

|          |    |                               |       |             |
|----------|----|-------------------------------|-------|-------------|
| t0036911 | 21 | 2 AAAGCTGGGATGAGAGGGCGA       | miRNA | miR-320a    |
| t0037161 | 20 | 2 AAAGCTGGGGTGAGAGGGCG        | miRNA | miR-320a    |
| t0037307 | 24 | 2 AAAAGCTGGGGTGAGAGGGCGAAA    | miRNA | miR-320a    |
| t0037372 | 20 | 2 AAAGATGGGTTGAGAGGGCG        | miRNA | miR-320a    |
| t0037993 | 23 | 2 AAAACCTGGGTTGAGAGGGCGAT     | miRNA | miR-320a    |
| t0038119 | 23 | 2 AATCTGAGAAGGTGCACAAGGTT     | miRNA | miR-3200-5p |
| t0038169 | 23 | 2 AATCTGAGAAGGGGCACAAGGTT     | miRNA | miR-3200-5p |
| t0038457 | 22 | 2 TCTGGGAGGTTGTAGAAGTGGGA     | miRNA | miR-3192    |
| t0038646 | 20 | 2 TGGAAGGAGACGGCCAGAG         | miRNA | miR-3190    |
| t0038844 | 21 | 2 CGGGGAGAGAACGCAGGGACG       | miRNA | miR-3175    |
| t0039072 | 23 | 2 GGCTGGTCCGAGTGCAGTGGGGA     | miRNA | miR-3135b   |
| t0039253 | 22 | 2 GGCTGGTCCGAGTGCAGGGGTG      | miRNA | miR-3135b   |
| t0039717 | 25 | 2 GGCTGGTCCGAGTGCAGTGGTGGTT   | miRNA | miR-3135b   |
| t0039962 | 23 | 2 GGCTGGTCCGAGGGCAGTGGTGA     | miRNA | miR-3135b   |
| t0040270 | 25 | 2 GGCTGGTCCGAGTGCAGTGGGGTTT   | miRNA | miR-3135b   |
| t0040310 | 21 | 2 TGGGACAAACGGACGGTTTTT       | miRNA | miR-3122    |
| t0040514 | 22 | 2 TATTGCACTTATCCCGCCTGA       | miRNA | miR-311a    |
| t0040547 | 20 | 2 TATTGCACTTATCCCGCCT         | miRNA | miR-311a    |
| t0038227 | 26 | 2 TGTA AACATCCTTGACTGGACGCATC | miRNA | miR-30e-5p  |
| t0040553 | 21 | 2 TGTA AACATCCTACACTCTCC      | miRNA | miR-30c     |
| t0037306 | 21 | 2 TGTA AACATCATACTACTCTCA     | miRNA | miR-30c     |
| t0038250 | 24 | 2 TGTA AACATCATACTACTCTCAGCT  | miRNA | miR-30c     |
| t0040611 | 24 | 2 TGTA AACATCCTACACTCTCCGCA   | miRNA | miR-30c     |
| t0036866 | 22 | 2 TGTA AACATCCCACACTCAGCT     | miRNA | miR-30b     |
| t0037157 | 22 | 2 TGTA AACATCCTACAATCAGCT     | miRNA | miR-30b     |
| t0037196 | 26 | 2 TGTA AACATCCTCGACTGGAAGCATA | miRNA | miR-30a-5p  |
| t0038406 | 23 | 2 GCGGGTCGGGGGGCGGGGCGGGC     | miRNA | miR-2981    |
| t0039143 | 19 | 2 CGGGTCGGGGGGCGGGGCG         | miRNA | miR-2981    |
| t0039964 | 21 | 2 CGGCGGCGGGCGGCGGAGGGG       | miRNA | miR-2885    |
| t0035387 | 23 | 2 CGGTCGGCGGGCGGCGGGGCGGG     | miRNA | miR-2885    |
| t0037682 | 23 | 2 CGGCGGCAGGCGGCGGGGGGGCC     | miRNA | miR-2885    |
| t0039978 | 20 | 2 GCGGATGTAGTCAAGTGGGA        | miRNA | miR-270     |
| t0035332 | 20 | 2 GCGGATGTAGCCAAGCGGA         | miRNA | miR-270     |
| t0038539 | 20 | 2 GCGTATGTAGCCAAGTGGGA        | miRNA | miR-270     |
| t0038830 | 20 | 2 GCGGATGTAGCCAGTGGGA         | miRNA | miR-270     |
| t0039343 | 22 | 2 GCGGATGTAGCCAAGTGGAGA       | miRNA | miR-270     |
| t0039152 | 20 | 2 GGAGGATGTAGCCAAGTGGGA       | miRNA | miR-270     |
| t0039199 | 21 | 2 TTCAAGTAATTCAGGGTAGGT       | miRNA | miR-26b     |
| t0036974 | 22 | 2 TTCAAGTAATTCAGGACAGGTT      | miRNA | miR-26b     |
| t0037100 | 21 | 2 TTCAAGTATTCAGGATAGGT        | miRNA | miR-26b     |
| t0039245 | 21 | 2 TTCAAGCAATTCAGGATAGGT       | miRNA | miR-26b     |
| t0036574 | 22 | 2 TTAAAGTAATTCAGGATAGGTT      | miRNA | miR-26b     |
| t0037037 | 22 | 2 TTCAAGTATTCAGGATAGGTT       | miRNA | miR-26b     |
| t0038468 | 21 | 2 TTCAAGTAATTCAGGATAGGT       | miRNA | miR-26b     |
| t0035616 | 21 | 2 TTCAAGTAATTCAGGATAGAT       | miRNA | miR-26b     |
| t0035709 | 22 | 2 TTCAAGTAATTCGGATAGGTT       | miRNA | miR-26b     |
| t0038460 | 22 | 2 TTCAAGTAATTCAGGCTAGGTT      | miRNA | miR-26b     |
| t0038535 | 21 | 2 TTCAAGGAATTCAGGATAGGT       | miRNA | miR-26b     |
| t0039453 | 22 | 2 TTCAAGTAATTCGGGATAGGTT      | miRNA | miR-26b     |
| t0040243 | 21 | 2 TTCAAGTAATTCAGGATAGGT       | miRNA | miR-26b     |
| t0035420 | 22 | 2 TTCAAGTAGTTCAGGATAGGTT      | miRNA | miR-26b     |
| t0035555 | 21 | 2 TTCAAGTAATTCAGGATAGGT       | miRNA | miR-26b     |
| t0036394 | 21 | 2 TTCAAGTAATTCAGGCTAGGT       | miRNA | miR-26b     |
| t0036703 | 22 | 2 TTCAAGTAATTCAGGATGGGTT      | miRNA | miR-26b     |
| t0036745 | 21 | 2 TTCAAATAATTCAGGATAGGT       | miRNA | miR-26b     |
| t0036927 | 21 | 2 TTCAAGTAATTCAGGATAGGT       | miRNA | miR-26b     |
| t0037112 | 22 | 2 TTCAAGTAATCCAGCATAGGCT      | miRNA | miR-26a     |
| t0037166 | 22 | 2 TTCAAATAATCCAGGATAGGCT      | miRNA | miR-26a     |

|          |    |                             |       |         |
|----------|----|-----------------------------|-------|---------|
| t0037920 | 21 | 2 TTCAAGTAATCCAGGATAGGT     | miRNA | miR-26a |
| t0038039 | 22 | 2 TTGAAGTAATCCAGGATAGGCT    | miRNA | miR-26a |
| t0038440 | 21 | 2 TCAAGTAATCCAGGATGGGCT     | miRNA | miR-26a |
| t0039534 | 22 | 2 TTCAAGTAGTCCAGGATAGGCT    | miRNA | miR-26a |
| t0039544 | 21 | 2 TTCAAGTAATCCATGATAGGC     | miRNA | miR-26a |
| t0039571 | 21 | 2 TTCAAGTAATCCAGGATAGAC     | miRNA | miR-26a |
| t0039720 | 21 | 2 TTCAAGTAATACAGGATAGGC     | miRNA | miR-26a |
| t0040041 | 22 | 2 TCCAAGTAATCCAGGATAGGCA    | miRNA | miR-26a |
| t0040214 | 25 | 2 TTCAAGTAATCCAGGATAGGCTATT | miRNA | miR-26a |
| t0040540 | 22 | 2 TTCAAGTAATCCAGGTTAGGCT    | miRNA | miR-26a |
| t0040578 | 21 | 2 TTCAAGTAATCCAGGATCGGC     | miRNA | miR-26a |
| t0035222 | 21 | 2 TGAGGTAGGAGGGTGTGTGGT     | miRNA | miR-265 |
| t0035375 | 20 | 2 TGAGGGAGGAGGGTGTGTGG      | miRNA | miR-265 |
| t0035661 | 22 | 2 TGAGGGAGGAGGGTGTGTGGTT    | miRNA | miR-265 |
| t0035688 | 21 | 2 AGGCGGAGACTTGGGAAATTG     | miRNA | miR-25* |
| t0035707 | 21 | 2 AGGTGGAGACTTGGGCAATTG     | miRNA | miR-25* |
| t0035731 | 21 | 2 AGGCGGAGTCTTGGGCAATTG     | miRNA | miR-25* |
| t0035960 | 23 | 2 AGGCGGAGACTTGGGAAATTGCT   | miRNA | miR-25* |
| t0036900 | 21 | 2 AGGAGGAGACTTGGGCAATTG     | miRNA | miR-25* |
| t0038398 | 20 | 2 GCGGAGACTTGGGCAATTG       | miRNA | miR-25* |
| t0038551 | 21 | 2 AGGCGGAGGCTTGGGCAATTG     | miRNA | miR-25* |
| t0039248 | 22 | 2 CATTGCATTTGTCTCGGGCTGA    | miRNA | miR-25  |
| t0039512 | 20 | 2 CATTGAACTTGTCTCGGTCT      | miRNA | miR-25  |
| t0040450 | 22 | 2 CATTGCACTGGTCTCGGTCTGA    | miRNA | miR-25  |
| t0036504 | 22 | 2 AATTGCACTTGTCTCGGTCTGC    | miRNA | miR-25  |
| t0039108 | 22 | 2 CATTGCACTTGTCTAGGTCTGT    | miRNA | miR-25  |
| t0040438 | 23 | 2 CATTGCACTTGTCTCGGTCTGCA   | miRNA | miR-25  |
| t0035937 | 22 | 2 CATTGCACTTGTCTCGGTATGT    | miRNA | miR-25  |
| t0035975 | 23 | 2 CATTGCACTTATCTCGGTCTGAA   | miRNA | miR-25  |
| t0036525 | 21 | 2 CCTTGCCTTGTCTCGGTCTG      | miRNA | miR-25  |
| t0038238 | 20 | 2 CATTGCACTTGTCTCGGTAT      | miRNA | miR-25  |
| t0039502 | 19 | 2 CATTGCACTTGTCTCGGGC       | miRNA | miR-25  |
| t0039596 | 22 | 2 CATTGAACTTGTCTCGGTCTGT    | miRNA | miR-25  |
| t0040065 | 22 | 2 CATTGCACTAGTCTCGGTCTGA    | miRNA | miR-25  |
| t0035271 | 22 | 2 CATTGCACTTGCCCTCGGTCTGT   | miRNA | miR-25  |
| t0035396 | 19 | 2 TTGCACTTGTCTCGGTCTG       | miRNA | miR-25  |
| t0035397 | 23 | 2 CATTGCACTTGTCTCGGTATGAA   | miRNA | miR-25  |
| t0035416 | 22 | 2 CATTGCACTTGTCTCGCTCTGA    | miRNA | miR-25  |
| t0035544 | 22 | 2 GATTGCACTTGTCTCGGTCTGT    | miRNA | miR-25  |
| t0035715 | 22 | 2 CATTGTACTTGTCTCGGTCTGT    | miRNA | miR-25  |
| t0035786 | 21 | 2 CATTGCACCTGTCTCGGTCTG     | miRNA | miR-25  |
| t0036645 | 21 | 2 TGGCTCAGTTCAGCAGGAAAA     | miRNA | miR-24b |
| t0036690 | 23 | 2 TGGCTCAGTTTAGCAGGAACAGT   | miRNA | miR-24  |
| t0037126 | 23 | 2 TGGCTCAGTTCAGCAGGGACAGT   | miRNA | miR-24  |
| t0037155 | 19 | 2 TGGCTCAGTTCAGCAGGCA       | miRNA | miR-24  |
| t0037964 | 22 | 2 TGACTCAGTTCAGCAGGAACAG    | miRNA | miR-24  |
| t0037990 | 22 | 2 TGGCTAAGTTCAGCAGGAACAG    | miRNA | miR-24  |
| t0038165 | 19 | 2 ATCACATTGCAAGGGATTA       | miRNA | miR-23b |
| t0038326 | 19 | 2 ATCACATTGCCGGGGATTA       | miRNA | miR-23b |
| t0038685 | 19 | 2 ATCACATTGCCGGGGATTT       | miRNA | miR-23a |
| t0038818 | 20 | 2 ATCACATTGCCAGGGCTTTA      | miRNA | miR-23a |
| t0039488 | 22 | 2 ATCACATTGCCAGGGATTTCCC    | miRNA | miR-23a |
| t0039757 | 22 | 2 ATCACATTGCCAGGGATTTCCG    | miRNA | miR-23a |
| t0040459 | 19 | 2 ATCACATTACCAGGGATTT       | miRNA | miR-23a |
| t0036256 | 19 | 2 ATCACCTTGCCAGGGATTT       | miRNA | miR-23a |
| t0035675 | 19 | 2 ATAACATTGCCAGGGATTT       | miRNA | miR-23a |
| t0036129 | 19 | 2 ATCACATTGCCAGGAATTT       | miRNA | miR-23a |
| t0036400 | 19 | 2 ATCGCATTGCCAGGGATTT       | miRNA | miR-23a |



|          |    |                              |       |              |
|----------|----|------------------------------|-------|--------------|
| t0037482 | 19 | 2 AACACATTGCCAGGGATTT        | miRNA | miR-23a      |
| t0038147 | 19 | 2 ATGACATTGCCAGGGATTT        | miRNA | miR-23a      |
| t0037479 | 20 | 2 ATCACATTGCCAGGAATTTT       | miRNA | miR-23a      |
| t0038908 | 19 | 2 ATCACATTGCCAGGGTTTT        | miRNA | miR-23a      |
| t0035353 | 20 | 2 AAGCTGCCAGTTGAAGAAAT       | miRNA | miR-22-3p    |
| t0035788 | 21 | 2 AGCTACATCTGGCTTCTGGGT      | miRNA | miR-222      |
| t0036961 | 21 | 2 AGCTAAATCTGGCTACTGGGT      | miRNA | miR-222      |
| t0036970 | 23 | 2 AGCTACATCTGGCTACTGGGGCA    | miRNA | miR-222      |
| t0037481 | 21 | 2 CAGCTACATTGTCTGCTGGGG      | miRNA | miR-221      |
| t0038657 | 22 | 2 AGCTACATTGTCTGCTGGGGTA     | miRNA | miR-221      |
| t0038878 | 21 | 2 GACTGGGGCGGCACATCTGTT      | miRNA | miR-219-2-3p |
| t0039043 | 21 | 2 TTGACTGGGGCGGGACATCTG      | miRNA | miR-219-2-3p |
| t0039144 | 22 | 2 TGACTGGGGCGGCACATCTGTT     | miRNA | miR-219-2-3p |
| t0039389 | 23 | 2 TGACTGGGGCGGGACATCTGTTA    | miRNA | miR-219-2-3p |
| t0039911 | 25 | 2 GACTGGGGCGGTACATCTGTTCAAT  | miRNA | miR-219-2-3p |
| t0039969 | 24 | 2 TGACTGGGGCGGGACATCTGTTAT   | miRNA | miR-219-2-3p |
| t0040461 | 22 | 2 TGATTGTCCATTCGCATTTCTT     | miRNA | miR-219      |
| t0040640 | 23 | 2 AGTGAGATTGTTGCATATTTACT    | miRNA | miR-2162-5p  |
| t0035599 | 21 | 2 AGTGAGATTGTTGCATATTTT      | miRNA | miR-2162-5p  |
| t0036878 | 25 | 2 ATGACCTATGATTTGACAGAAAATC  | miRNA | miR-215      |
| t0038596 | 25 | 2 ATGACCTATGATTTGACAGACCATC  | miRNA | miR-215      |
| t0035251 | 24 | 2 TTGGGGAACCGCCGCTGAGGGAG    | miRNA | miR-2110     |
| t0040399 | 21 | 2 TAGCTTATCAGAATGATGTTG      | miRNA | miR-21       |
| t0035719 | 21 | 2 TAGCTTATCAGTCTGATGTTG      | miRNA | miR-21       |
| t0036112 | 21 | 2 TAGCTTATCAGACTCATGTTG      | miRNA | miR-21       |
| t0038823 | 21 | 2 TCGCTTATCAGACTGATGTTG      | miRNA | miR-21       |
| t0039418 | 21 | 2 TAGCTTATTAGACTGATGTTG      | miRNA | miR-21       |
| t0040313 | 21 | 2 TAGCTTATAAGACTGATGTTG      | miRNA | miR-21       |
| t0040434 | 21 | 2 TAGCTTATCAGACTGGTGTG       | miRNA | miR-21       |
| t0039771 | 22 | 2 TAGCTTATCAGGCTGATGTTGA     | miRNA | miR-21       |
| t0036291 | 26 | 2 TAGCTTATCAGACTGATGTTGCCATC | miRNA | miR-21       |
| t0040463 | 23 | 2 CAAAGTGCCCATAGTGCAGGTAG    | miRNA | miR-20b      |
| t0036791 | 25 | 2 CGGAATGTAAGGAAGTGTGTGGATC  | miRNA | miR-206      |
| t0039483 | 19 | 2 TTTATGCATATACTTCTTT        | miRNA | miR-202-5p   |
| t0035586 | 21 | 2 TTTCTATGCATATACTTCTT       | miRNA | miR-202*     |
| t0035294 | 22 | 2 TAAAGCGCTTATAGTGCAGGTA     | miRNA | miR-20       |
| t0035999 | 24 | 2 TAAAGTGCTTATAGTGCAGGAAGA   | miRNA | miR-20       |
| t0036250 | 23 | 2 ATAAAGTGCTTATAGTGCAGGAA    | miRNA | miR-20       |
| t0036392 | 23 | 2 TAAAGTGCTTATAGGGCAGGTAG    | miRNA | miR-20       |
| t0037053 | 21 | 2 TAAAGTGCTTATAGTGCCGGT      | miRNA | miR-20       |
| t0037199 | 23 | 2 TAAAGTGCTTATAGTGCAGGGAG    | miRNA | miR-20       |
| t0038690 | 22 | 2 TAAAGTGCTTATAGGGCAGGTA     | miRNA | miR-20       |
| t0040097 | 22 | 2 TAAAGTGCTTATAGTGCAGGAA     | miRNA | miR-20       |
| t0040242 | 22 | 2 TAAAGTGCTTACAGTGCAGGTA     | miRNA | miR-20       |
| t0036095 | 25 | 2 TGAATGTAAGAAGTATGTATATA    | miRNA | miR-1a       |
| t0039270 | 21 | 2 TAGGGAGTTTCCTGTTGTTGG      | miRNA | miR-196b     |
| t0035900 | 22 | 2 TAGGGAGTTTCCTGTTGTTGGA     | miRNA | miR-196b     |
| t0035457 | 18 | 2 TGAGGTAGGGTGTATAGT         | miRNA | miR-1961     |
| t0036814 | 20 | 2 TAGCAGCACATAAATATTCG       | miRNA | miR-195      |
| t0037503 | 23 | 2 TGTAACAGCAAATCCATGTGGAA    | miRNA | miR-194      |
| t0037563 | 22 | 2 TGGGGCTTTGCGGGCGAGATGA     | miRNA | miR-193a-5p  |
| t0038725 | 20 | 2 CTGACCTATGAATTAACAGC       | miRNA | miR-192      |
| t0038729 | 21 | 2 GTGACCTATGAATTGACAGCC      | miRNA | miR-192      |
| t0039003 | 21 | 2 TGATCTATGAATTGACAGCCA      | miRNA | miR-192      |
| t0039240 | 23 | 2 TGACCTATGAATTGACGGCCAGT    | miRNA | miR-192      |
| t0039537 | 21 | 2 CTGACCTATGAATCGACAGCC      | miRNA | miR-192      |
| t0040265 | 21 | 2 TGACCTATGAATTGATAGCCA      | miRNA | miR-192      |
| t0040579 | 22 | 2 CCGACCTATGAATTGACAGCCA     | miRNA | miR-192      |

|          |    |                             |       |         |
|----------|----|-----------------------------|-------|---------|
| t0036858 | 21 | 2 CTGACCTGTGAATTGACAGCC     | miRNA | miR-192 |
| t0038218 | 23 | 2 TGCCCTATGAATTGACAGCCAGA   | miRNA | miR-192 |
| t0036344 | 21 | 2 CTGACCTATGAATTGACCGCT     | miRNA | miR-192 |
| t0038178 | 21 | 2 CTGACCTATCAATTGACAGCC     | miRNA | miR-192 |
| t0040631 | 24 | 2 TGACCTATGAATTGACAGACAGAA  | miRNA | miR-192 |
| t0038739 | 24 | 2 CTGACCTATGAATTGACAGCCCGT  | miRNA | miR-192 |
| t0035385 | 23 | 2 TGACCTATGAATTGAAAGCCAGT   | miRNA | miR-192 |
| t0035418 | 20 | 2 TGACCTATGAATTGATAGCC      | miRNA | miR-192 |
| t0035578 | 21 | 2 CTGACCTATGAATTGACAGTC     | miRNA | miR-192 |
| t0035607 | 21 | 2 TGACCTATGAATTGACCGCCA     | miRNA | miR-192 |
| t0035963 | 20 | 2 CGACCTATGAATTGACAGCC      | miRNA | miR-192 |
| t0036298 | 21 | 2 CTGACCTATGAATTGACGGCC     | miRNA | miR-192 |
| t0036691 | 20 | 2 TGACCTATGAATTGACAACC      | miRNA | miR-192 |
| t0036737 | 23 | 2 CAGCGGAATCCCAAAAAGCAGCTG  | miRNA | miR-191 |
| t0036985 | 21 | 2 CAACGGAATCACAAAAGCAGC     | miRNA | miR-191 |
| t0037016 | 23 | 2 CGACGGAATCCCAAAAAGCAGCTG  | miRNA | miR-191 |
| t0037780 | 22 | 2 CAACGGAATCCCAAAAAGAAGAT   | miRNA | miR-191 |
| t0037890 | 23 | 2 AACGAAATCCCAAAAAGCAGCTGA  | miRNA | miR-191 |
| t0038243 | 20 | 2 CAACGGAATCCCAACAGCAG      | miRNA | miR-191 |
| t0038317 | 23 | 2 CCACGGAATCCCAAAAAGCAGCTG  | miRNA | miR-191 |
| t0038550 | 23 | 2 CAACGGAATCCCAAAAAGCAGCTG  | miRNA | miR-191 |
| t0038564 | 21 | 2 AAGGGAATCCCAAAAAGCAGCT    | miRNA | miR-191 |
| t0039170 | 24 | 2 CAACGGAATCACAAAAGCAGCTGA  | miRNA | miR-191 |
| t0039529 | 22 | 2 CAACGGAATCCCAAAAAGCGGCT   | miRNA | miR-191 |
| t0040473 | 22 | 2 AACGCAATCCCAAAAAGCAGCTG   | miRNA | miR-191 |
| t0040630 | 23 | 2 CAACGGAATCCCAAAAAGTAGCTG  | miRNA | miR-191 |
| t0035235 | 22 | 2 CAACGGAATACCAAAAAGCAGCA   | miRNA | miR-191 |
| t0035242 | 23 | 2 CAACGGAATCCCAAAAAGCAACTG  | miRNA | miR-191 |
| t0035684 | 24 | 2 CAACGGGATCCCAAAAAGCAGCTGA | miRNA | miR-191 |
| t0035750 | 20 | 2 CAACGGCATCCCAAAAAGCAG     | miRNA | miR-191 |
| t0035881 | 22 | 2 CAACGGAATCCCAAAAATCAGCT   | miRNA | miR-191 |
| t0035910 | 22 | 2 AACGGAATCTCAAAAAGCCGCTG   | miRNA | miR-191 |
| t0035968 | 23 | 2 CAATGGAATCCCAAAAAGCAGCTG  | miRNA | miR-191 |
| t0036159 | 19 | 2 CAACAGAATCCCAAAAAGCA      | miRNA | miR-191 |
| t0036286 | 21 | 2 GACGGAATCCCAAAAAGCAGCT    | miRNA | miR-191 |
| t0036317 | 23 | 2 CAACGGAATCCCAAAAACCAGCTG  | miRNA | miR-191 |
| t0036420 | 23 | 2 CAACGGAATCCCAAGAGCAGCTG   | miRNA | miR-191 |
| t0036438 | 22 | 2 CAACGGAATCGCAAAAAGCAGCT   | miRNA | miR-191 |
| t0036502 | 20 | 2 CAAAGGAATCCCAAAAAGCAG     | miRNA | miR-191 |
| t0036710 | 22 | 2 AATGGAATCCCAAAAAGCAGCTG   | miRNA | miR-191 |
| t0036712 | 24 | 2 CAATGGAATCCCAAAAAGCAGCTGA | miRNA | miR-191 |
| t0036823 | 21 | 2 CAACGGAATCCCAAAAACAGC     | miRNA | miR-191 |
| t0036857 | 22 | 2 AACGGAATCCTAAAAGCAGCTG    | miRNA | miR-191 |
| t0036891 | 21 | 2 CAAAGGAATCCCAAAAAGCAGC    | miRNA | miR-191 |
| t0036904 | 22 | 2 CAACGGAATCCCAAAAACCAGCT   | miRNA | miR-191 |
| t0036938 | 22 | 2 AACGGAATCCCAAAAAGTAGCTG   | miRNA | miR-191 |
| t0036967 | 22 | 2 CAACGGAATCCGAAAAGCAGCT    | miRNA | miR-191 |
| t0037007 | 22 | 2 GAACGGAATCCCAAAAAGCAGCT   | miRNA | miR-191 |
| t0037033 | 22 | 2 AACGGAATCCCAAAAAGCAGCTT   | miRNA | miR-191 |
| t0037170 | 21 | 2 CAACGGAATCCCAAAAAGGAGC    | miRNA | miR-191 |
| t0037395 | 22 | 2 AACGGAATCCCAAGAGCAGCTG    | miRNA | miR-191 |
| t0037485 | 22 | 2 CAACGGAATCCCAAAAAGCAGGT   | miRNA | miR-191 |
| t0037519 | 22 | 2 CAACGGAATCCCAAAAAGCATCT   | miRNA | miR-191 |
| t0037638 | 23 | 2 CAACTGAATCCCAAAAAGCAGCTG  | miRNA | miR-191 |
| t0037710 | 23 | 2 AACGGAATCCCAAAAACAGCTGA   | miRNA | miR-191 |
| t0037877 | 24 | 2 CAACGGAATCCCAAAAAGCAGCGGA | miRNA | miR-191 |
| t0037916 | 23 | 2 CAACGGAATCCCAAGAAGCAGCTG  | miRNA | miR-191 |
| t0038052 | 21 | 2 AACGGAATCACAAAAGCAGCT     | miRNA | miR-191 |

|          |    |                            |       |          |
|----------|----|----------------------------|-------|----------|
| t0038204 | 22 | 2 CAACGGAATCCCAAAGGCAGCT   | miRNA | miR-191  |
| t0038466 | 22 | 2 CAAGGGAATCCCAAAAGCAGCT   | miRNA | miR-191  |
| t0038500 | 22 | 2 CAACGGAATACAAAAAGCAGCT   | miRNA | miR-191  |
| t0038541 | 23 | 2 CAACGGAATCCCAAAAGCAGCTC  | miRNA | miR-191  |
| t0038556 | 23 | 2 CAACGGAATCCCTAAAGCAGCTG  | miRNA | miR-191  |
| t0038647 | 22 | 2 CAAAGGAATCCCAAAAGCAGCA   | miRNA | miR-191  |
| t0038802 | 23 | 2 AAACGGAATCCCAAAAGCAGCTG  | miRNA | miR-191  |
| t0038804 | 19 | 2 CAATGGAATCCCAAAAGCA      | miRNA | miR-191  |
| t0038997 | 23 | 2 AATGGAATCCCAAAAGCAGCTGA  | miRNA | miR-191  |
| t0039094 | 23 | 2 AACGGAATCCCACAAGCAGCTGA  | miRNA | miR-191  |
| t0039212 | 24 | 2 CACCGGAATCCCAAAAGCAGCTGA | miRNA | miR-191  |
| t0039297 | 22 | 2 CAACGGAATCCCAAAAGCTGCT   | miRNA | miR-191  |
| t0039301 | 23 | 2 CAACGGAATCCCAACGCAGCTG   | miRNA | miR-191  |
| t0039303 | 23 | 2 CAACGGAATCCCATAAGCAGCTG  | miRNA | miR-191  |
| t0039317 | 21 | 2 TAAGGTGCATCTAGTGCCGTT    | miRNA | miR-18b  |
| t0039616 | 21 | 2 AGCAGGGGCTGGCTTTACTACT   | miRNA | miR-185* |
| t0039931 | 21 | 2 AGGGGTCGGCTTTCCTCTGGT    | miRNA | miR-185* |
| t0039956 | 20 | 2 TGGAGAGAAATGCAGTTCCT     | miRNA | miR-185  |
| t0040023 | 24 | 2 TGGAGAGAGAAAGGCAGTTCCTGA | miRNA | miR-185  |
| t0040098 | 22 | 2 TGGAGAGAAAGCCAGTACTGA    | miRNA | miR-185  |
| t0040173 | 20 | 2 GGGAGAGAAAGGCAGTTCCT     | miRNA | miR-185  |
| t0040301 | 23 | 2 TGGAGAGAAAGGCAGTTGCTGAT  | miRNA | miR-185  |
| t0040491 | 22 | 2 TAGAGAGAAAGGGAGTTCCTGA   | miRNA | miR-185  |
| t0040499 | 23 | 2 TGGAGAGAAAGGCAATTCCTGAG  | miRNA | miR-185  |
| t0040529 | 23 | 2 TGGAGAGAAAGGCAGTTCGTGAT  | miRNA | miR-185  |
| t0040570 | 20 | 2 TGGAGAGCAAGGCAGTTCCT     | miRNA | miR-185  |
| t0040615 | 24 | 2 TGGAGAGAAAGGCAGTTCCTGGAA | miRNA | miR-185  |
| t0039183 | 22 | 2 TGGAGAGAAAGGCAGTTCCTGT   | miRNA | miR-185  |
| t0038405 | 24 | 2 TGGAGAGAAAGGAAGTTCCTGAAG | miRNA | miR-185  |
| t0038899 | 20 | 2 TGGAGAGAAAGGCAGTCCCT     | miRNA | miR-185  |
| t0035209 | 21 | 2 TGGAGAGAAAGGAATTCCTG     | miRNA | miR-185  |
| t0035217 | 22 | 2 TGGAGAGAAAGACAGTTCCTGC   | miRNA | miR-185  |
| t0035326 | 22 | 2 TGGAGAGAAAGGGAGTTCATGA   | miRNA | miR-185  |
| t0035407 | 23 | 2 CTGGAGAGAAAGGAAGTTCCTGA  | miRNA | miR-185  |
| t0035472 | 23 | 2 TGAAGAGAAAGGCAGTTCCTGAT  | miRNA | miR-185  |
| t0035496 | 21 | 2 GGAGAGAAAGGAAGTTCCTGA    | miRNA | miR-185  |
| t0035516 | 21 | 2 TGGAGAGAAAGGAAGTTGCTG    | miRNA | miR-185  |
| t0035600 | 23 | 2 TGGAGAGAAAAGCAGTTCCTGAG  | miRNA | miR-185  |
| t0035784 | 22 | 2 TGGAGAGAAAGGCATTCCTGC    | miRNA | miR-185  |
| t0035802 | 22 | 2 TGGAGAGAAAGGAAGTTCTTGA   | miRNA | miR-185  |
| t0035838 | 22 | 2 TGGAGAGAAAGGAAGTTCCTAA   | miRNA | miR-185  |
| t0035863 | 20 | 2 TGGAGAGAAAGGCACTTCCT     | miRNA | miR-185  |
| t0036046 | 21 | 2 TGGAGAGAAAGGCAGTTCCTT    | miRNA | miR-185  |
| t0036047 | 24 | 2 TGGAGAGAAAGGCAGTTCCTAAAA | miRNA | miR-185  |
| t0036084 | 23 | 2 TGGAGAGGAAGGCAGTTCCTGAG  | miRNA | miR-185  |
| t0036202 | 22 | 2 TAGAGAGAAAGGCAGTTCCTCGA  | miRNA | miR-185  |
| t0036341 | 23 | 2 TGGAGAGAAAGGCTGTTCTGAA   | miRNA | miR-185  |
| t0036462 | 20 | 2 TGGAGAGAAAGGCAGTACCT     | miRNA | miR-185  |
| t0036507 | 23 | 2 TGGCGAGAAAAGGCAGTTCCTGAG | miRNA | miR-185  |
| t0036526 | 21 | 2 TGGAGAGAAAGGCAGTTAATG    | miRNA | miR-185  |
| t0036548 | 22 | 2 TGGAGGGAAAGGCAGTTCCTTA   | miRNA | miR-185  |
| t0036584 | 22 | 2 TGGAGAGAAAGGCAGTTCCTGT   | miRNA | miR-185  |
| t0036790 | 22 | 2 TGGAGAGAACGGCAGTTCCTGC   | miRNA | miR-185  |
| t0036800 | 20 | 2 TGGGAGAAAAGGCAGTTCCTG    | miRNA | miR-185  |
| t0036865 | 22 | 2 TGGCGAGAAAAGGCAGTTCCTGA  | miRNA | miR-185  |
| t0037031 | 22 | 2 TGGAGAGATAGGCATTCCTGA    | miRNA | miR-185  |
| t0037050 | 23 | 2 TGGAGAGAAAGGCGTTACTGAA   | miRNA | miR-185  |
| t0037120 | 23 | 2 TGGAGAGATAGGCAGTTCCTGAT  | miRNA | miR-185  |

|          |    |                              |       |          |
|----------|----|------------------------------|-------|----------|
| t0037186 | 22 | 2 TGGAGAGAAAGGCAGTTCATGC     | miRNA | miR-185  |
| t0037228 | 22 | 2 TGGAGATAAAGGCAGTTCCTGG     | miRNA | miR-185  |
| t0037298 | 23 | 2 GGGAGAGAAAGGCAGTTCCTGAG    | miRNA | miR-185  |
| t0037371 | 22 | 2 TAGAGAGAAAGGAAGTTCCTGA     | miRNA | miR-185  |
| t0037407 | 22 | 2 TGGAGAGAAAAGCAGTTACTGA     | miRNA | miR-185  |
| t0037696 | 21 | 2 TGGAGAGAAAGGAAGTTCCTA      | miRNA | miR-185  |
| t0037740 | 22 | 2 TGGAGAGAAAGGCAGTTACTTA     | miRNA | miR-185  |
| t0037743 | 20 | 2 TGAAGAGAAAGGCAGTTCCT       | miRNA | miR-185  |
| t0037797 | 20 | 2 TGGAGAGAACGGCAGTTCCT       | miRNA | miR-185  |
| t0037959 | 22 | 2 TGGAGAGAAGGGCAGTTTCTGA     | miRNA | miR-185  |
| t0038072 | 23 | 2 TGGAGAGAAATGCAGTTCCTGAT    | miRNA | miR-185  |
| t0038381 | 20 | 2 TGGAGAGAAAGGCAGTTCGT       | miRNA | miR-185  |
| t0038494 | 23 | 2 TGGAGAGAAAGTCAGTTCCTGAT    | miRNA | miR-185  |
| t0038621 | 23 | 2 TGGAGAGAAAGGCACCTTCCTGAT   | miRNA | miR-185  |
| t0038747 | 22 | 2 TGGCGAGAAAGGCAGTTCCTGC     | miRNA | miR-185  |
| t0038764 | 23 | 2 TGGAGAGAAAGGCAGTGCCTGAA    | miRNA | miR-185  |
| t0039049 | 25 | 2 TGGAGAGAAAGGAAGTTCCTGAAAA  | miRNA | miR-185  |
| t0039051 | 22 | 2 TGGAGGGAAAGGCAGTTCCTGC     | miRNA | miR-185  |
| t0039064 | 24 | 2 TGGAGAGAAAGGCAGTTACTGAAA   | miRNA | miR-185  |
| t0039214 | 23 | 2 TGGAGAGAAAGTCAGTTCCTGAA    | miRNA | miR-185  |
| t0039216 | 21 | 2 TGGAGAGAAGGGAAGTTCCTG      | miRNA | miR-185  |
| t0039300 | 22 | 2 TGGAGATAAAGGCAGTTCCTGC     | miRNA | miR-185  |
| t0039306 | 20 | 2 TGGAGAGAAAGGCTGTTCT        | miRNA | miR-185  |
| t0039319 | 22 | 2 TGGAGAGAAAGGGAGTTTCTGA     | miRNA | miR-185  |
| t0039438 | 22 | 2 TGGAGAGAAAGGAATTCCTGA      | miRNA | miR-185  |
| t0039548 | 21 | 2 TGGAGAGAAAGGAAGGTCCTG      | miRNA | miR-185  |
| t0039561 | 22 | 2 TGGAGAGAAAGGGAGTTCCTGC     | miRNA | miR-185  |
| t0039576 | 22 | 2 TGGAGAGCAAGGCAGTTCCTGC     | miRNA | miR-185  |
| t0039600 | 22 | 2 TGGAGAAAAAGGAAGTTCCTGA     | miRNA | miR-185  |
| t0039621 | 22 | 2 TGGAGAGAAAGGCATTCCTGA      | miRNA | miR-185  |
| t0039649 | 22 | 2 TGGAGGGAAAGGCAGTTCCTGT     | miRNA | miR-185  |
| t0039746 | 22 | 2 TGGAGAGAAAGGGAGTTACTGA     | miRNA | miR-185  |
| t0039750 | 22 | 2 TGGAGAGGAAGGCAGTTCCTGT     | miRNA | miR-185  |
| t0039880 | 23 | 2 TGGAAAGAAAGGCAGTTCCTGAG    | miRNA | miR-185  |
| t0039916 | 21 | 2 TGGAGAGCAAGGCAGTTACTG      | miRNA | miR-185  |
| t0039965 | 20 | 2 AAGGAAGATAGAACAGGTCT       | miRNA | miR-1839 |
| t0039981 | 22 | 2 AGGTTAGATAGAACAGGTCTTG     | miRNA | miR-1839 |
| t0040104 | 21 | 2 AGGTAGGTAGAACAGGTCTTG      | miRNA | miR-1839 |
| t0040109 | 21 | 2 AGGTAGATAGAACAGGTCTCG      | miRNA | miR-1839 |
| t0040134 | 22 | 2 AAGGTAGATAGAACAGGTCTTG     | miRNA | miR-1839 |
| t0040165 | 21 | 2 AGGTAGATAGAACAGGACTTG      | miRNA | miR-1839 |
| t0040221 | 22 | 2 AGGTAGATAGAACAGGACTTGT     | miRNA | miR-1839 |
| t0040367 | 22 | 2 AAGGTAGATAGAGCAGGTCTTG     | miRNA | miR-1839 |
| t0040414 | 23 | 2 AAGGTAGATAGAAAAGGTCTTGA    | miRNA | miR-1839 |
| t0040436 | 22 | 2 AGGTGGATAGAACAGGTCTTGT     | miRNA | miR-1839 |
| t0040524 | 22 | 2 AGGAAGATAGAACAGGTCTTGA     | miRNA | miR-1839 |
| t0040593 | 23 | 2 AAGGTAGATAGAACAGGCCTTGA    | miRNA | miR-1839 |
| t0040596 | 22 | 2 AAGGTAGATAGAACAGGTCTTA     | miRNA | miR-1839 |
| t0035195 | 18 | 2 AAGGCAGATAGAACAGGT         | miRNA | miR-1839 |
| t0035931 | 22 | 2 AAGGTAGTTAGAACAGGTCTTG     | miRNA | miR-1839 |
| t0036589 | 22 | 2 AAGGTAGATAGAAAAGGTCTTG     | miRNA | miR-1839 |
| t0036753 | 22 | 2 TGAGGAAGTAGATTGTGTGGTT     | miRNA | miR-1827 |
| t0037062 | 19 | 2 TGAGGGAGTAGATTGTAGT        | miRNA | miR-1827 |
| t0037128 | 22 | 2 TGAGGGAGTAGATTGTAGAGTT     | miRNA | miR-1827 |
| t0037874 | 22 | 2 TGAGGAAGTAGATTGTATATTT     | miRNA | miR-1827 |
| t0037897 | 21 | 2 TAGGGAGTAGATTGTATAGTT      | miRNA | miR-1827 |
| t0038483 | 21 | 2 TGAGGGAGAAGGTTGTATAGT      | miRNA | miR-1827 |
| t0038604 | 26 | 2 TGAGGGAGTAGGTTGTATGGTTTATC | miRNA | miR-1827 |

|          |    |                               |       |           |
|----------|----|-------------------------------|-------|-----------|
| t0038736 | 22 | 2 TGAGGGAGTAGGATGTATAGTT      | miRNA | miR-1827  |
| t0039290 | 22 | 2 TGAGGGAGTCGATTGTATAGTT      | miRNA | miR-1827  |
| t0039743 | 21 | 2 TGAGGGAGTAGATTGCATAGT       | miRNA | miR-1827  |
| t0039946 | 21 | 2 TGAGGGAGTAGGTTGTATTGT       | miRNA | miR-1827  |
| t0040208 | 20 | 2 TGAGGGGGTAGATTGTATAG        | miRNA | miR-1827  |
| t0040617 | 21 | 2 TGAGGGAGTAGATTGTATACT       | miRNA | miR-1827  |
| t0035295 | 19 | 2 GAGGGAGTAGATTGTATAG         | miRNA | miR-1827  |
| t0035316 | 22 | 2 TGAGGGAGTAGATTGTATAGCT      | miRNA | miR-1827  |
| t0035357 | 22 | 2 TGAGGGAGTAGTTTGTATAGTT      | miRNA | miR-1827  |
| t0035359 | 20 | 2 TGCGGTAGTAGATTGTATTT        | miRNA | miR-1827  |
| t0035404 | 23 | 2 TGAGGGAGTAGATTGTATAGTAA     | miRNA | miR-1827  |
| t0035753 | 23 | 2 TGAGGGAGTAGGTTGTATAGTTT     | miRNA | miR-1827  |
| t0036007 | 26 | 2 TGAGGGAGTAGATTGTATAGTTACGT  | miRNA | miR-1827  |
| t0036180 | 20 | 2 TGAGGGAGTAGATTGTACAG        | miRNA | miR-1827  |
| t0036384 | 21 | 2 TGAGGGAGTAGATTGTATAGG       | miRNA | miR-1827  |
| t0036480 | 23 | 2 TGAGGGAGTAGTTTGTACAGTAA     | miRNA | miR-1827  |
| t0036493 | 20 | 2 TGAGGGAGTAGGTTGTATGG        | miRNA | miR-1827  |
| t0036695 | 21 | 2 TGAGGAAGTAGATTGTATGGT       | miRNA | miR-1827  |
| t0037041 | 22 | 2 TGAGGGAGTAGATTGTATTGTT      | miRNA | miR-1827  |
| t0037311 | 21 | 2 TGAGGGAGTAGATTGTATCGT       | miRNA | miR-1827  |
| t0037390 | 24 | 2 TGAGGGAGTAGATTGTATAGTTGA    | miRNA | miR-1827  |
| t0037435 | 22 | 2 TGAGGCAGTAGATTGTATATTT      | miRNA | miR-1827  |
| t0037459 | 20 | 2 TGAGGGAGTAGGTTGTAGTT        | miRNA | miR-1827  |
| t0037575 | 22 | 2 TGAGGGAGTAGATTGTATAGAA      | miRNA | miR-1827  |
| t0037599 | 22 | 2 CTGAGGGAGTAGGTTGTATAGT      | miRNA | miR-1827  |
| t0037724 | 22 | 2 TGAGGGAGGAGATTGTGTAGTT      | miRNA | miR-1827  |
| t0037758 | 22 | 2 TGAGGAAGTAGATTGTATGGTT      | miRNA | miR-1827  |
| t0037817 | 22 | 2 TGAGAGAGTAGATTGTATAGTT      | miRNA | miR-1827  |
| t0037900 | 22 | 2 TGAGGGAGTAGATTGTAAAGTT      | miRNA | miR-1827  |
| t0038044 | 21 | 2 TGAGGGAATAGGTTGTATAGT       | miRNA | miR-1827  |
| t0038392 | 22 | 2 TGGGGGAGTAGGTTGTATAGTT      | miRNA | miR-1827  |
| t0038571 | 22 | 2 TGAGGGAGTTGATTGTATAGTT      | miRNA | miR-1827  |
| t0038803 | 22 | 2 TGAGGCAGTAGATTGTATACTT      | miRNA | miR-1827  |
| t0038809 | 18 | 2 TGAGGGAGTAGATTGTAG          | miRNA | miR-1827  |
| t0038888 | 22 | 2 TGAGGGAGTAGGTTGTATCGTT      | miRNA | miR-1827  |
| t0038984 | 22 | 2 TGAGGGAGTAGTTTGTACAGTA      | miRNA | miR-1827  |
| t0039120 | 22 | 2 TTTGGCAATGGGAGAACTCACA      | miRNA | miR-182   |
| t0039879 | 24 | 2 TTTGGCAATGGTAGAAATCACACT    | miRNA | miR-182   |
| t0039942 | 28 | 2 TTTGGCAATGGTAGAACTACCCCGATC | miRNA | miR-182   |
| t0040038 | 23 | 2 TTTGGCAATGGTAGAACTACCCC     | miRNA | miR-182   |
| t0040095 | 22 | 2 TTTGGCAATGGTAGAACTCCCA      | miRNA | miR-182   |
| t0040217 | 24 | 2 TTTGGCAATGGTAGAACTACCCT     | miRNA | miR-182   |
| t0040286 | 20 | 2 AACATTCATTGCTATCGGTG        | miRNA | miR-181b  |
| t0040321 | 22 | 2 ACATTCATTGCTGTCGGTGGGG      | miRNA | miR-181b  |
| t0040398 | 21 | 2 AACATTCAACGCTGTCGGGGA       | miRNA | miR-181a  |
| t0040416 | 21 | 2 AACATTCAACGCTGTCGGTGC       | miRNA | miR-181a  |
| t0040477 | 24 | 2 AACATTCAACGCTGTCGGTGA CTC   | miRNA | miR-181a  |
| t0040532 | 20 | 2 AACATTCAACGCTGGCGGTG        | miRNA | miR-181a  |
| t0040638 | 23 | 2 AACATTCAACGCTGTCGGAGAGT     | miRNA | miR-181a  |
| t0036016 | 22 | 2 AACATTAACGCTGTCGGTGAG       | miRNA | miR-181a  |
| t0037083 | 19 | 2 AACATTCAACGCTGTAGGT         | miRNA | miR-181a  |
| t0037498 | 22 | 2 CAAAGTGCTTACAGTGCAGGTC      | miRNA | miR-17a   |
| t0038153 | 23 | 2 CAAAGTGCTCATAGTGCAGGTCG     | miRNA | miR-17a   |
| t0039748 | 24 | 2 TCGGGGCGGCGGCGGCGGGGG       | miRNA | miR-1777a |
| t0040351 | 19 | 2 TCGGGGCGGCGGCGGCGGC         | miRNA | miR-1777a |
| t0039624 | 22 | 2 TCGGGGCGGCGGCGGCGGGGG       | miRNA | miR-1777a |
| t0039807 | 18 | 2 TCGGGGCGGCGGCGGGGG          | miRNA | miR-1777a |
| t0035524 | 20 | 2 TCGGGGCGGCGGCGGAGGCG        | miRNA | miR-1777a |

|          |    |                               |       |           |
|----------|----|-------------------------------|-------|-----------|
| t0036185 | 23 | 2 ACTGCAGTGAAGGCACTTGGAGA     | miRNA | miR-17-3p |
| t0036246 | 22 | 2 ACTGCAGTGAAGGAACTTGTAG      | miRNA | miR-17*   |
| t0036535 | 22 | 2 ACTGAAGTGAAGGCACTTGTAG      | miRNA | miR-17*   |
| t0036639 | 19 | 2 ACTGCAGTGAAGGAACTTG         | miRNA | miR-17*   |
| t0037872 | 24 | 2 CAAAGTGCTTACAGTGCAGGCAGA    | miRNA | miR-17    |
| t0039877 | 22 | 2 CAAAGTGCTTACAGAGCAGGTA      | miRNA | miR-17    |
| t0037281 | 21 | 2 CAAAGTGCTTATAGTGCAGGT       | miRNA | miR-17    |
| t0039465 | 22 | 2 CAAAGTGCTTACAGTGTAGGTA      | miRNA | miR-17    |
| t0035858 | 23 | 2 CAAAGTGCTTACAGTGCAGGAAG     | miRNA | miR-17    |
| t0036872 | 22 | 2 CAAAGTGCTTATAGTGCAGGTA      | miRNA | miR-17    |
| t0038806 | 24 | 2 CAAAGTGCTTACAGGGCAGGTAGA    | miRNA | miR-17    |
| t0039822 | 23 | 2 CAAAGGGCTTACAGTGCAGGTAG     | miRNA | miR-17    |
| t0040072 | 24 | 2 CAAAGTGCTTACAGTGCAGGTAGC    | miRNA | miR-17    |
| t0038617 | 23 | 2 CAAAGTGCTTACAGTGCAGGGAG     | miRNA | miR-17    |
| t0035803 | 22 | 2 TAGCAGCACGTTAATATTGGCA      | miRNA | miR-16b   |
| t0039137 | 24 | 2 TAGCAGCACGTAAATATTGGAAA     | miRNA | miR-16b   |
| t0039620 | 22 | 2 TAGCAGCACGTAAATATTGGTT      | miRNA | miR-16b   |
| t0035667 | 22 | 2 TAGCAGCATGTAAATATTGGCA      | miRNA | miR-16b   |
| t0035683 | 22 | 2 TAGCAGCACGTAAATATTGACA      | miRNA | miR-16b   |
| t0036120 | 22 | 2 TAGCAGCACGGAAATATTGGCT      | miRNA | miR-16b   |
| t0036594 | 22 | 2 TAGCAGAACGTAAATATTGGCC      | miRNA | miR-16b   |
| t0039262 | 21 | 2 TACAGCACGTAAATATTGGCT       | miRNA | miR-16b   |
| t0039346 | 22 | 2 TAGCAACACGTAAATATTGGCA      | miRNA | miR-16b   |
| t0039798 | 22 | 2 TAGCAGCGCGTAAATATTGGCT      | miRNA | miR-16b   |
| t0039812 | 22 | 2 TAGCAGCACGTAAATATCGGCA      | miRNA | miR-16b   |
| t0040154 | 22 | 2 TAGCAGCACGTAAATATTAGCA      | miRNA | miR-16b   |
| t0040262 | 22 | 2 TAGCAGCAAGTAAATATTGGCA      | miRNA | miR-16b   |
| t0036906 | 28 | 2 GGCGGGGAGCGGTCTGGCGGCGGCGGT | miRNA | miR-1607  |
| t0037169 | 25 | 2 GGCGGGGAGCGGTCTGGCGGCGGGG   | miRNA | miR-1607  |
| t0037421 | 19 | 2 TAGCAGCACGTAAATATTT         | miRNA | miR-16    |
| t0037770 | 24 | 2 TGGCAGCACGTAAATATTGGCGAA    | miRNA | miR-16    |
| t0038561 | 22 | 2 TAGCGGCACGTAAATATTGGAG      | miRNA | miR-16    |
| t0038631 | 20 | 2 TAGCAGGACGTAAATATTGG        | miRNA | miR-16    |
| t0039112 | 22 | 2 TAGCCGCACGTAAATATTGGAG      | miRNA | miR-16    |
| t0039395 | 22 | 2 TAGCAGCACGTAGATATTGTCTG     | miRNA | miR-16    |
| t0039428 | 22 | 2 TAGCAGCACGTCAATATTGGAG      | miRNA | miR-16    |
| t0039617 | 23 | 2 TATCAGCACGTAAATATTGGCGA     | miRNA | miR-16    |
| t0040030 | 22 | 2 TAGCAGCATGTAAATATTGTCTG     | miRNA | miR-16    |
| t0040119 | 19 | 2 TAGCAGCACGCAAATATTG         | miRNA | miR-16    |
| t0040174 | 22 | 2 TAGCAGCACGTAAATACTGCCG      | miRNA | miR-16    |
| t0037046 | 22 | 2 TAGCCGCACGTAAATATTGCCG      | miRNA | miR-16    |
| t0038697 | 21 | 2 TAGCAGCAAGTAAATATTGGT       | miRNA | miR-16    |
| t0035312 | 22 | 2 TAGAAACACGTAAATATTGGCG      | miRNA | miR-16    |
| t0035398 | 23 | 2 TAGCAGCACGTAACTATTGGCGT     | miRNA | miR-16    |
| t0035431 | 19 | 2 TAGCAGCACGGAAATATTG         | miRNA | miR-16    |
| t0035441 | 19 | 2 TAGCAGCCCGTAAATATTG         | miRNA | miR-16    |
| t0035449 | 23 | 2 TAGCAGCCCGTAAATATTGGCGA     | miRNA | miR-16    |
| t0035462 | 24 | 2 AATAGCAGCACGTAAATATTGGAG    | miRNA | miR-16    |
| t0035493 | 21 | 2 AGTAGCACGTAAATATTGGCG       | miRNA | miR-16    |
| t0035510 | 19 | 2 TAGCCGCACGTAAATATTG         | miRNA | miR-16    |
| t0035559 | 19 | 2 TAGCAGCACGTACATATTG         | miRNA | miR-16    |
| t0035596 | 22 | 2 TAGCAGCACGTAAATATTGAAG      | miRNA | miR-16    |
| t0035836 | 19 | 2 TAACAGCACGTAAATATTG         | miRNA | miR-16    |
| t0035840 | 23 | 2 TAGCAGCACGTGAATATTGGCGA     | miRNA | miR-16    |
| t0035852 | 23 | 2 TAGCACCACGTAAATATTGGCGA     | miRNA | miR-16    |
| t0035971 | 19 | 2 CAGCAGCACGTAAATATTG         | miRNA | miR-16    |
| t0036019 | 24 | 2 TAGCAGCACGTAAATATTGGTGAA    | miRNA | miR-16    |
| t0036178 | 20 | 2 TTGCAGCACGTAAATATTGG        | miRNA | miR-16    |

|          |    |                            |       |        |
|----------|----|----------------------------|-------|--------|
| t0036235 | 22 | 2 TAGCAGCACGTCAATATTGTCG   | miRNA | miR-16 |
| t0036242 | 22 | 2 TAGCAGCACGTAAATATTATCG   | miRNA | miR-16 |
| t0036281 | 23 | 2 TAGGAGCACGTAAATATTGGCGT  | miRNA | miR-16 |
| t0036339 | 21 | 2 TAGCAGCACGTAAATATTGCA    | miRNA | miR-16 |
| t0036465 | 20 | 2 TAGCAGCACGTATATATTGG     | miRNA | miR-16 |
| t0036607 | 22 | 2 TAGCAGCACGTAAATATTAGAG   | miRNA | miR-16 |
| t0036643 | 22 | 2 TAGCAGCATGTAATATTGCCG    | miRNA | miR-16 |
| t0036682 | 23 | 2 TACCAGCACGTAAATATTGGCGA  | miRNA | miR-16 |
| t0036839 | 22 | 2 TAGCAGAACGTAAATATTGGTG   | miRNA | miR-16 |
| t0036889 | 21 | 2 AGCAGCACGTAAGTATTGGCG    | miRNA | miR-16 |
| t0037178 | 22 | 2 TAGTAGCACGTAAATATTGTCG   | miRNA | miR-16 |
| t0037213 | 22 | 2 AAGCAGTACGTAAATATTGGCG   | miRNA | miR-16 |
| t0037227 | 19 | 2 TAGCAGCGCGTAAATATTG      | miRNA | miR-16 |
| t0037229 | 20 | 2 TAGCAGCACGTTAATATTGG     | miRNA | miR-16 |
| t0037255 | 23 | 2 TAGCAGCACGTAAATATAGGCGA  | miRNA | miR-16 |
| t0037317 | 23 | 2 TAGCAGCAGGTAATATTGGCGA   | miRNA | miR-16 |
| t0037592 | 19 | 2 TAGCATCACGTAAATATTG      | miRNA | miR-16 |
| t0037615 | 21 | 2 TAGCAGAACGTAAATATTGGC    | miRNA | miR-16 |
| t0037620 | 23 | 2 TAGCAGCAAGTAAATATTGGCGA  | miRNA | miR-16 |
| t0037662 | 23 | 2 TAGCAGCGCGTAAATATTGGCGT  | miRNA | miR-16 |
| t0037685 | 23 | 2 ATAGGAGCACGTAAATATTGGCG  | miRNA | miR-16 |
| t0037706 | 22 | 2 TAGCAGCGCGTAAATATTGTCG   | miRNA | miR-16 |
| t0037945 | 21 | 2 AGCAGAACGTAAATATTGGCG    | miRNA | miR-16 |
| t0038060 | 22 | 2 TAGCAGCAAGTAAATATTGTCG   | miRNA | miR-16 |
| t0038129 | 23 | 2 TAGCAGCACGTGAATATTGGCGT  | miRNA | miR-16 |
| t0038241 | 23 | 2 TAGCAGCACCTAAATATTGGCGA  | miRNA | miR-16 |
| t0038418 | 22 | 2 TAGCAGCACGTAAATATTGAG    | miRNA | miR-16 |
| t0038453 | 21 | 2 TAGCAGTACGTAAATATTGGT    | miRNA | miR-16 |
| t0038505 | 21 | 2 AGCAGCACGTAAATATTAGCG    | miRNA | miR-16 |
| t0038520 | 20 | 2 TAGCAGCACGTAAATATTCA     | miRNA | miR-16 |
| t0038588 | 22 | 2 TAGCAGAACGTAAATATTGGGG   | miRNA | miR-16 |
| t0038629 | 22 | 2 TAGCAGAACGTAAATATTTGCG   | miRNA | miR-16 |
| t0038663 | 19 | 2 TAGGAGCACGTAAATATTG      | miRNA | miR-16 |
| t0038682 | 23 | 2 TAGCAGCACGTCAATATTGGCGT  | miRNA | miR-16 |
| t0038692 | 22 | 2 TAGCAGCACGTCAATATTGCCG   | miRNA | miR-16 |
| t0038760 | 23 | 2 TAGCAGCACGTAAAAATTGGCGA  | miRNA | miR-16 |
| t0038787 | 21 | 2 TAGCACCACGTAAATATTGGC    | miRNA | miR-16 |
| t0038867 | 21 | 2 AGCAGCACGGAAATATTGGCG    | miRNA | miR-16 |
| t0038894 | 22 | 2 TAGCAGCATGTAATATTGACG    | miRNA | miR-16 |
| t0038922 | 20 | 2 TATCAGCACGTAAATATTGG     | miRNA | miR-16 |
| t0038951 | 19 | 2 TAGCAGGACGTAAATATTG      | miRNA | miR-16 |
| t0038968 | 24 | 2 TAGCAGCACGGAAATATTGGCGAA | miRNA | miR-16 |
| t0038974 | 22 | 2 TAGCCGTACGTAAATATTGGCG   | miRNA | miR-16 |
| t0038987 | 22 | 2 TAGCAGTATGTAATATTGGCG    | miRNA | miR-16 |
| t0039019 | 24 | 2 TAGCAGCATGTAATATTGGCGAA  | miRNA | miR-16 |
| t0039068 | 22 | 2 TAGCGGCACGTAAATATTGTCG   | miRNA | miR-16 |
| t0039125 | 20 | 2 TGCAGCACGTAAATATTGGC     | miRNA | miR-16 |
| t0039157 | 22 | 2 TAGCAGCACGTAAACATTGTCG   | miRNA | miR-16 |
| t0039311 | 22 | 2 TAGAAGCACGTAAATATTGGTG   | miRNA | miR-16 |
| t0039314 | 23 | 2 ATAGCAGCACGTAAATATTGGAG  | miRNA | miR-16 |
| t0039315 | 23 | 2 TAGCAGCACGTAAATATGGGCGA  | miRNA | miR-16 |
| t0039390 | 21 | 2 AGCAGCACGTAAATATTTGCG    | miRNA | miR-16 |
| t0039592 | 20 | 2 TAGCAGCACCTAAATATTGG     | miRNA | miR-16 |
| t0039619 | 22 | 2 TAGCAGCATGTAAGTATTGGCG   | miRNA | miR-16 |
| t0039625 | 23 | 2 TAGCAGCACGTAAATGTTGGCGT  | miRNA | miR-16 |
| t0039642 | 19 | 2 TGGCAGCACGTAAATATTG      | miRNA | miR-16 |
| t0039677 | 22 | 2 TAGGAGCACGTAAATATTGTCG   | miRNA | miR-16 |
| t0039692 | 19 | 2 TAGCAGCATGTAATATTG       | miRNA | miR-16 |

|          |    |                           |       |         |
|----------|----|---------------------------|-------|---------|
| t0039696 | 22 | 2 TAGCAGAACGTAGATATTGGCG  | miRNA | miR-16  |
| t0039703 | 18 | 2 TAGCGGCACATCATGGTT      | miRNA | miR-15b |
| t0039888 | 20 | 2 TAGAAGCACATCATGGGTTA    | miRNA | miR-15b |
| t0039894 | 19 | 2 TAGAAGCAAATCATGGTTT     | miRNA | miR-15b |
| t0039992 | 19 | 2 TAGCAGAGCATCATGGTTT     | miRNA | miR-15b |
| t0040026 | 21 | 2 TAGCAGCACATCATGGTTAAA   | miRNA | miR-15b |
| t0040059 | 21 | 2 TAGCAGCACATCATGGTTTCC   | miRNA | miR-15b |
| t0040093 | 19 | 2 TAGCAGCAAATCATGGGTT     | miRNA | miR-15b |
| t0040182 | 21 | 2 TAGCAGCCCATCATGGTTTAC   | miRNA | miR-15b |
| t0040296 | 22 | 2 TAGCAGCACATAATGGTTTATG  | miRNA | miR-15b |
| t0040366 | 19 | 2 TAGCAGCACATCATGATTT     | miRNA | miR-15b |
| t0040460 | 18 | 2 TAGCATCACATCATGGTT      | miRNA | miR-15b |
| t0040527 | 19 | 2 TAGCAGCACATCAAGGTTT     | miRNA | miR-15b |
| t0040618 | 20 | 2 TAGCAGCACATCATGGTATA    | miRNA | miR-15b |
| t0035581 | 22 | 2 TAGCAGCACTTCATGGTTTACA  | miRNA | miR-15b |
| t0035842 | 19 | 2 TAGCAGCACATCATGGTAT     | miRNA | miR-15b |
| t0035865 | 21 | 2 TAGCAGCAAATCATGGTTTAC   | miRNA | miR-15b |
| t0035883 | 21 | 2 TAGCAGCACACCATGGTTTAC   | miRNA | miR-15b |
| t0035979 | 19 | 2 CAGCAGCACATCATGGTTA     | miRNA | miR-15b |
| t0036049 | 19 | 2 TAGCAGCGCATCATGGTTA     | miRNA | miR-15b |
| t0036078 | 20 | 2 TAGAAGCACATAATGGTTTA    | miRNA | miR-15b |
| t0036363 | 20 | 2 TAGCAGCACATCATGGGTTT    | miRNA | miR-15b |
| t0036370 | 22 | 2 TAGCAGCACAGCATGGTTTACA  | miRNA | miR-15b |
| t0036379 | 22 | 2 TAGCAGCACATCATGGGTTATA  | miRNA | miR-15b |
| t0036561 | 18 | 2 TGGCAGCACATCATGGTT      | miRNA | miR-15b |
| t0036610 | 21 | 2 TAGCAGCACATTATGGTTTAC   | miRNA | miR-15b |
| t0036861 | 22 | 2 TAGCAGCACATCATGGTATAACA | miRNA | miR-15b |
| t0036873 | 18 | 2 TAGCAGCACCTCATGGTT      | miRNA | miR-15b |
| t0037055 | 22 | 2 TAGCAGCTCATCATGGTTTACA  | miRNA | miR-15b |
| t0037107 | 19 | 2 TAGCAGGAAATCATGGTTT     | miRNA | miR-15b |
| t0037139 | 21 | 2 TAGCAGCACATCATGGATTAC   | miRNA | miR-15b |
| t0037201 | 21 | 2 TAGAAGCACATCATGGTTTAC   | miRNA | miR-15b |
| t0037205 | 18 | 2 TAGCAGGACATCATGGTT      | miRNA | miR-15b |
| t0037474 | 21 | 2 TAGCAGCACATCGTGGTTTAC   | miRNA | miR-15b |
| t0037950 | 21 | 2 TAGCATCACATCATGGTTTAA   | miRNA | miR-15b |
| t0038015 | 20 | 2 TAGAAGCAAATCATGGTTTA    | miRNA | miR-15b |
| t0038063 | 22 | 2 TAGCAGCACATCATGGTTTAGA  | miRNA | miR-15b |
| t0038327 | 22 | 2 TAGCAGAACATCATGGGTTACA  | miRNA | miR-15b |
| t0038650 | 22 | 2 TAGCAGCACATAATGGTTCGTG  | miRNA | miR-15a |
| t0038781 | 21 | 2 TAGCCGCACATAATGGTTTGT   | miRNA | miR-15a |
| t0038919 | 21 | 2 TAGCAGCACATAATGGTTCGT   | miRNA | miR-15a |
| t0039056 | 21 | 2 TAGCAGAACATAATGGGTTGT   | miRNA | miR-15a |
| t0039202 | 21 | 2 TAGCAGCAGATAATGGTTTGT   | miRNA | miR-15a |
| t0039288 | 22 | 2 TAGCGGCACATAATGGTTTGTG  | miRNA | miR-15a |
| t0039810 | 21 | 2 TAGCAGCACATAATGGTGTGT   | miRNA | miR-15a |
| t0039848 | 20 | 2 TAGCAGCACATAATGGGCTG    | miRNA | miR-15a |
| t0039980 | 22 | 2 TAGCAGCACATAATGGTTTGGGA | miRNA | miR-15a |
| t0040188 | 22 | 2 TAGAAGCACATAATGGTTTGTG  | miRNA | miR-15a |
| t0040203 | 19 | 2 CAGCAGCACATAATGGTTT     | miRNA | miR-15a |
| t0040339 | 22 | 2 TAGCAGAACATAATGGTTTACA  | miRNA | miR-15a |
| t0040624 | 19 | 2 AAGCAGCACATAATGGTTT     | miRNA | miR-15a |
| t0035304 | 22 | 2 TAGCAGCACATAATGATTTGTG  | miRNA | miR-15a |
| t0035443 | 23 | 2 ATAGCAGCACATAATGGTTTTTG | miRNA | miR-15a |
| t0035594 | 22 | 2 TAGCAACACATAATGGTTTGTG  | miRNA | miR-15a |
| t0035679 | 18 | 2 TAGCCGCACATAATGGTT      | miRNA | miR-15a |
| t0035730 | 20 | 2 TAGCAGCACATAATGGGGTG    | miRNA | miR-15a |
| t0035820 | 21 | 2 TCGCAGCACATAATGGTTTGT   | miRNA | miR-15a |
| t0035921 | 19 | 2 TAGCAGCACGTAATGGTTT     | miRNA | miR-15a |



|          |    |                              |       |             |
|----------|----|------------------------------|-------|-------------|
| t0036109 | 19 | 2 TAGCAACACATAATGGTTT        | miRNA | miR-15a     |
| t0036700 | 19 | 2 TAGCAGCACATAATGGCTT        | miRNA | miR-15a     |
| t0036838 | 20 | 2 TAGCAGCACATAATGGTATG       | miRNA | miR-15a     |
| t0036929 | 18 | 2 TAGCAGCGCATAATGGTT         | miRNA | miR-15a     |
| t0036952 | 20 | 2 TAGCTGCACATAATGGTTTG       | miRNA | miR-15a     |
| t0037042 | 21 | 2 TAGCAGCACACAATGGGTTGT      | miRNA | miR-15a     |
| t0037068 | 22 | 2 TAGCAGCACATAGTGGTTTGTG     | miRNA | miR-15a     |
| t0037077 | 20 | 2 TAGCAGAACATAATGGGTTG       | miRNA | miR-15a     |
| t0037085 | 21 | 2 TAGCAGGACATAATGGTTTGT      | miRNA | miR-15a     |
| t0037344 | 22 | 2 TAGGAGCACATAATGGTTTGTG     | miRNA | miR-15a     |
| t0037875 | 19 | 2 TAGCAGCACATAATGGTTA        | miRNA | miR-15a     |
| t0037978 | 18 | 2 TAGCAGCACATAATGGTA         | miRNA | miR-15a     |
| t0038299 | 20 | 2 TAGCAGGACATAATGGTTTG       | miRNA | miR-15a     |
| t0038407 | 24 | 2 TCAGTGCATGACAGAACTTGGCTC   | miRNA | miR-152     |
| t0038445 | 21 | 2 TCTCCTAACCCCTGTACCAGT      | miRNA | miR-150     |
| t0038627 | 22 | 2 TCTCCCAACCCTTGAACCAGTG     | miRNA | miR-150     |
| t0038652 | 22 | 2 TCTCCCAACCCTTGTAGCAGTG     | miRNA | miR-150     |
| t0039211 | 21 | 2 TCAGGGCATCACAGAACTTTG      | miRNA | miR-148b-3p |
| t0039230 | 23 | 2 TCAGTGCATCACAGAACTTTGCA    | miRNA | miR-148b-3p |
| t0039281 | 21 | 2 ACAGTGCACACAGAACTTTG       | miRNA | miR-148a    |
| t0039361 | 21 | 2 TCAGTGCACCACAGAACTTTG      | miRNA | miR-148a    |
| t0039363 | 21 | 2 TCAGTGAACACAGAACTTTG       | miRNA | miR-148a    |
| t0039787 | 27 | 2 TGAGAACTGAATCCATAGGCTGGATC | miRNA | miR-146b    |
| t0040181 | 23 | 2 GGATATCATCATATATTGTAAGT    | miRNA | miR-144*    |
| t0040213 | 22 | 2 GGATATCATCATATACTGGAAG     | miRNA | miR-144*    |
| t0040252 | 23 | 2 GGATATAATCATATACTGTAAGT    | miRNA | miR-144*    |
| t0036821 | 21 | 2 GGATCTCATCATATACTGTAA      | miRNA | miR-144*    |
| t0036603 | 21 | 2 GGATATCATCATATAGTGTAA      | miRNA | miR-144*    |
| t0038536 | 22 | 2 GGATATCATCATATACTGTTAG     | miRNA | miR-144*    |
| t0038993 | 22 | 2 GGATATCATAATATACTGTAAG     | miRNA | miR-144*    |
| t0035815 | 22 | 2 GGATATTATCATATACTGTAAG     | miRNA | miR-144*    |
| t0036466 | 22 | 2 GGATATCACCATATACTGTAAG     | miRNA | miR-144*    |
| t0037256 | 20 | 2 GGATATAATCATATACTGTA       | miRNA | miR-144*    |
| t0038648 | 21 | 2 TACAGTATAGATGATGTCCTA      | miRNA | miR-144     |
| t0040021 | 20 | 2 TACAGGATAGATGATGTA         | miRNA | miR-144     |
| t0039035 | 20 | 2 TACAGTATAGATGTTGTA         | miRNA | miR-144     |
| t0035619 | 20 | 2 CACAGTATAGATGATGTA         | miRNA | miR-144     |
| t0035648 | 18 | 2 TACAGAATAGATGATGTA         | miRNA | miR-144     |
| t0036443 | 18 | 2 CACAGTATAGATGATGTA         | miRNA | miR-144     |
| t0036688 | 18 | 2 TACAGTATAGATGACGTA         | miRNA | miR-144     |
| t0037894 | 18 | 2 TATAGTATAGATGATGTA         | miRNA | miR-144     |
| t0038303 | 18 | 2 TACAGTATAGGTGATGTA         | miRNA | miR-144     |
| t0039400 | 19 | 2 CTGCAGTATAGATGATGTA        | miRNA | miR-144     |
| t0040157 | 18 | 2 TACAGTATAGATGATGAA         | miRNA | miR-144     |
| t0040335 | 18 | 2 TACGGTATAGATGATGTA         | miRNA | miR-144     |
| t0040401 | 25 | 2 TACAGTATAGATGATGTAAAAAAA   | miRNA | miR-144     |
| t0035241 | 19 | 2 CTACATTATAGATGATGTA        | miRNA | miR-144     |
| t0035265 | 19 | 2 CTACAGTATAGCTGATGTA        | miRNA | miR-144     |
| t0035401 | 19 | 2 CTACAGTATAGATGATGTG        | miRNA | miR-144     |
| t0036560 | 22 | 2 TACAGTATAGATGATGTA         | miRNA | miR-144     |
| t0037030 | 18 | 2 TACAGTATTGATGATGTA         | miRNA | miR-144     |
| t0037216 | 22 | 2 TACAGTATAGATGACGTA         | miRNA | miR-144     |
| t0037328 | 19 | 2 CTACAGTATAGATGACGTA        | miRNA | miR-144     |
| t0037413 | 19 | 2 CTACAGTATAGATGCTGTA        | miRNA | miR-144     |
| t0037822 | 23 | 2 TGAGATGAAGCACTGTAGCTATA    | miRNA | miR-143     |
| t0038171 | 23 | 2 TGAGATGAAGCACAGTAGCTATC    | miRNA | miR-143     |
| t0038886 | 23 | 2 TGAGATGAAGCACTGTAGTTATC    | miRNA | miR-143     |
| t0038963 | 23 | 2 TGAGATGAAGAACTGTAGCTATC    | miRNA | miR-143     |

|          |    |                              |       |            |
|----------|----|------------------------------|-------|------------|
| t0039138 | 23 | 2 TGAGATGAAGCACTGGAGCTATC    | miRNA | miR-143    |
| t0039181 | 23 | 2 TGAGATGGAGCACTGTAGCTATC    | miRNA | miR-143    |
| t0039373 | 23 | 2 TGGGATGAAGCACTGTAGCTATC    | miRNA | miR-143    |
| t0039652 | 23 | 2 CGAGATGAAGCACTGTAGCTATC    | miRNA | miR-143    |
| t0039876 | 23 | 2 TGAGATGAAGCACTATAGCTATC    | miRNA | miR-143    |
| t0039903 | 19 | 2 CATAAAGAAGAAAGCACTA        | miRNA | miR-142-5p |
| t0039929 | 19 | 2 CATAAAGCAGAAAGCACTA        | miRNA | miR-142-5p |
| t0040126 | 21 | 2 CATAAAGTAGAAAGCATTACT      | miRNA | miR-142-5p |
| t0040402 | 19 | 2 CATAAAGTAGAAAGAACTA        | miRNA | miR-142-5p |
| t0035687 | 20 | 2 ACCATAAAGTAGAAAGCACT       | miRNA | miR-142-5p |
| t0036476 | 20 | 2 CATAAAGTAGAAAGTACTAC       | miRNA | miR-142-5p |
| t0036699 | 21 | 2 CATAAAGTAGAAAGCACTAAT      | miRNA | miR-142-5p |
| t0036930 | 22 | 2 GTGGTGTTCCTACTTTATGGA      | miRNA | miR-142-3p |
| t0037132 | 22 | 2 GTAGTGTTCCTACTTTCTGGA      | miRNA | miR-142-3p |
| t0038173 | 22 | 2 GTAGGGTTCCTACTTTATGGA      | miRNA | miR-142-3p |
| t0039335 | 21 | 2 GGAGTGTTCCTACTTTATGG       | miRNA | miR-142*   |
| t0039423 | 20 | 2 CCCATAAAGTAGCAAGCACT       | miRNA | miR-142    |
| t0039522 | 20 | 2 CCCATAAAGTAGAAAGCCTT       | miRNA | miR-142    |
| t0035440 | 21 | 2 CCCATAAAGTAGAAGGCACTA      | miRNA | miR-142    |
| t0035495 | 20 | 2 CCCATCAAGTAGAAAGCACT       | miRNA | miR-142    |
| t0036205 | 18 | 2 CCCATAAAGTAGAAAGAA         | miRNA | miR-142    |
| t0036917 | 20 | 2 CCCATAAAGTAGAACGCACT       | miRNA | miR-142    |
| t0037119 | 21 | 2 CCCATAAAGTAAAAAGCACTA      | miRNA | miR-142    |
| t0038712 | 21 | 2 CCAATAAAGTAGAAAGCACTA      | miRNA | miR-142    |
| t0039940 | 21 | 2 CCCATAAAGTGGAAAGCACTA      | miRNA | miR-142    |
| t0035917 | 19 | 2 CCCATAAAGTAGAAAGCCC        | miRNA | miR-142    |
| t0038151 | 20 | 2 CCCATAAAGTAGAAGGCACT       | miRNA | miR-142    |
| t0040177 | 21 | 2 CCCATAAAGTAGGAAGCACTA      | miRNA | miR-142    |
| t0036558 | 21 | 2 CCCATAAAGTAGAAAGCAATA      | miRNA | miR-142    |
| t0035233 | 21 | 2 CCCACAAAGTAGAAAGCACTA      | miRNA | miR-142    |
| t0035438 | 21 | 2 ACCACAGGGTAGAATCATGGA      | miRNA | miR-140    |
| t0036590 | 24 | 2 TACCACAGGGTAGAACTACGGCCA   | miRNA | miR-140    |
| t0038649 | 23 | 2 TACGACAGGGTAGAACCACGGAT    | miRNA | miR-140    |
| t0038776 | 21 | 2 ACCAAAGGGTAGAAACACGGA      | miRNA | miR-140    |
| t0038883 | 21 | 2 ACCACAGGCTAGAAACACGGA      | miRNA | miR-140    |
| t0038917 | 24 | 2 ACCACAGGGTAGAACCACGGCCGA   | miRNA | miR-140    |
| t0039071 | 22 | 2 ACCACAGGGTAGTACCACGGAT     | miRNA | miR-140    |
| t0039116 | 22 | 2 ACCACAGGGGAGAACCACGGCT     | miRNA | miR-140    |
| t0039221 | 21 | 2 ACAACAGGGTAGAAACACGGA      | miRNA | miR-140    |
| t0039244 | 22 | 2 ACCACAGGGTAGAACCACGACTGAC  | miRNA | miR-140    |
| t0039247 | 20 | 2 ATCACAGGGTAGAACCACGG       | miRNA | miR-140    |
| t0039383 | 22 | 2 ACCACAGGGTAAAACCACGGAT     | miRNA | miR-140    |
| t0039794 | 22 | 2 ACCACTGGGTAGAACCACGGAC     | miRNA | miR-140    |
| t0035204 | 23 | 2 TACCACAGGGTAGAACAACGGCC    | miRNA | miR-140    |
| t0035231 | 24 | 2 TACCACAGGGTAGTACCACGGACA   | miRNA | miR-140    |
| t0035249 | 23 | 2 ACCCCAGGGTAGAACCACGGACA    | miRNA | miR-140    |
| t0035288 | 22 | 2 ACCACAGGGTAGTACCACGGAA     | miRNA | miR-140    |
| t0035290 | 23 | 2 TACCACAGGGAAGAACCACGGAT    | miRNA | miR-140    |
| t0035337 | 23 | 2 ACCACAGGGTGAACCACGGATA     | miRNA | miR-140    |
| t0035390 | 20 | 2 CTACAGGGTAGAACCACGGA       | miRNA | miR-140    |
| t0035450 | 23 | 2 TACCACAGGGTAGGACCACGGAT    | miRNA | miR-140    |
| t0035464 | 24 | 2 TACCACAGGGAAGAACCACGGACG   | miRNA | miR-140    |
| t0035501 | 26 | 2 ACCACAGGGTAGAACCACGGCCAAGA | miRNA | miR-140    |
| t0035504 | 20 | 2 ACCACAGGGTAGAACCACGA       | miRNA | miR-140    |
| t0035557 | 23 | 2 TACCACAGGGTTGAACCACGGAT    | miRNA | miR-140    |
| t0035565 | 22 | 2 ACCACAGGGTAGAAGCACGGAA     | miRNA | miR-140    |
| t0035570 | 22 | 2 ACCACGGGTAGAACCACGGAA      | miRNA | miR-140    |
| t0035631 | 22 | 2 ACCACAGGGTAGCACTACGGAA     | miRNA | miR-140    |

|          |    |                             |       |         |
|----------|----|-----------------------------|-------|---------|
| t0035666 | 22 | 2 TACCACAGGGCAGAACCCCGGA    | miRNA | miR-140 |
| t0035805 | 22 | 2 ACCACAGGGGAGAACAACGGAC    | miRNA | miR-140 |
| t0035895 | 22 | 2 TACCACAGGGAAGAACCCCGGA    | miRNA | miR-140 |
| t0035924 | 24 | 2 TACCACAGGGTAGAACCAAGGAAA  | miRNA | miR-140 |
| t0035958 | 24 | 2 TACCGCAGGGTAGAACCACGGAAA  | miRNA | miR-140 |
| t0036014 | 23 | 2 TACCACAGGCTAGAAACACGGAC   | miRNA | miR-140 |
| t0036018 | 23 | 2 ACCACAGGGTAGGACCACGGACA   | miRNA | miR-140 |
| t0036028 | 24 | 2 TACTACAGGGTAGAACCACGGAAA  | miRNA | miR-140 |
| t0036045 | 22 | 2 ACCACAGGGTAGAACGACGGAA    | miRNA | miR-140 |
| t0036081 | 22 | 2 TACCACAGGGTGAACCCCGGA     | miRNA | miR-140 |
| t0036087 | 23 | 2 TACCACAGGGGAGAACCACGGAG   | miRNA | miR-140 |
| t0036094 | 24 | 2 TACCACAGGGTAGAATCCCGGACA  | miRNA | miR-140 |
| t0036099 | 24 | 2 ACCACAGGGGAGAACCACGGGAAGA | miRNA | miR-140 |
| t0036103 | 22 | 2 ACCACAGGGGACAACCACGGAC    | miRNA | miR-140 |
| t0036108 | 22 | 2 ACCACAGGGTAGAACCAGGAAA    | miRNA | miR-140 |
| t0036118 | 20 | 2 CCACAGGGTAGAACCCCGGA      | miRNA | miR-140 |
| t0036121 | 23 | 2 ACCACAGGGTAGAACCACGGCAG   | miRNA | miR-140 |
| t0036130 | 22 | 2 ACAACAGGGTAGAAACACGGAA    | miRNA | miR-140 |
| t0036135 | 24 | 2 TACCACAGGGTAGAACCAAGGAAT  | miRNA | miR-140 |
| t0036142 | 21 | 2 CCACAGGGTAGAAACACGGAA     | miRNA | miR-140 |
| t0036154 | 22 | 2 TCCACAGGGTAGAACCACGGAC    | miRNA | miR-140 |
| t0036187 | 22 | 2 TACCATAGGGTAGAACCCCGGA    | miRNA | miR-140 |
| t0036238 | 23 | 2 TACTACAGGGTAGAACCACGGAG   | miRNA | miR-140 |
| t0036271 | 21 | 2 TACCACAGGGTAGAACCACCG     | miRNA | miR-140 |
| t0036402 | 22 | 2 ACCACAGGCTAGAACCACGGAC    | miRNA | miR-140 |
| t0036508 | 21 | 2 ACCACAGGGAAGAACCACGGT     | miRNA | miR-140 |
| t0036547 | 22 | 2 TACTACAGGGTAGAACCCCGGA    | miRNA | miR-140 |
| t0036555 | 21 | 2 ACCACAGTGTAGAAACACGGA     | miRNA | miR-140 |
| t0036615 | 21 | 2 ACCACAGGGTAGAACCCCGGT     | miRNA | miR-140 |
| t0036622 | 23 | 2 TACCACAGGGTAGAAAACAAGGAA  | miRNA | miR-140 |
| t0036626 | 22 | 2 TACCACAGGGTAGAACAACGGT    | miRNA | miR-140 |
| t0036635 | 23 | 2 TACCACAGGGTAGAATCCCGGAC   | miRNA | miR-140 |
| t0036653 | 21 | 2 ACCACAGGGAAGAACAACGGA     | miRNA | miR-140 |
| t0036749 | 24 | 2 TACCACAGGGTAGAAAAACGGACA  | miRNA | miR-140 |
| t0036756 | 23 | 2 ACCACAGGGTAGAACCACGGGTA   | miRNA | miR-140 |
| t0036948 | 20 | 2 CCACGGGGTAGAACCACGGA      | miRNA | miR-140 |
| t0037078 | 20 | 2 CCACAGGGTAGAACCATGGA      | miRNA | miR-140 |
| t0037115 | 22 | 2 TACACAGGGTAGAACCACGGAA    | miRNA | miR-140 |
| t0037135 | 22 | 2 ACCACAGGGTAGAACCACTGAA    | miRNA | miR-140 |
| t0037187 | 23 | 2 ACTACAGGGTAGAACCACGGACA   | miRNA | miR-140 |
| t0037220 | 24 | 2 TACCACAGGGTAGAACCACGGCAT  | miRNA | miR-140 |
| t0037279 | 22 | 2 ACCACAGGGTATAACCACGGAA    | miRNA | miR-140 |
| t0037283 | 24 | 2 TACCACAGGGGAGAACCACGGAAA  | miRNA | miR-140 |
| t0037326 | 23 | 2 TACCACAGGGTAGTACCACGGCT   | miRNA | miR-140 |
| t0037331 | 22 | 2 CCACAGGGTAGAACAACGGACA    | miRNA | miR-140 |
| t0037343 | 24 | 2 TACCACAGGGTAGAACCAGGACA   | miRNA | miR-140 |
| t0037348 | 23 | 2 TACCACAGGGCAGAACTACGGAA   | miRNA | miR-140 |
| t0037386 | 23 | 2 TACCACAGGGTAGAAACCCCGAC   | miRNA | miR-140 |
| t0037400 | 22 | 2 TACAACAGGGTAGAACTACGGA    | miRNA | miR-140 |
| t0037402 | 24 | 2 TACCACAGGGTAGGACCACGGAAA  | miRNA | miR-140 |
| t0037405 | 23 | 2 TACCACAGGGTAGAACCAAGGCC   | miRNA | miR-140 |
| t0037453 | 24 | 2 TACCACAGGGTAGAACTACGGAAA  | miRNA | miR-140 |
| t0037494 | 21 | 2 ACCACAGGGTAGAACACCGGA     | miRNA | miR-140 |
| t0037502 | 23 | 2 TACCACAGGGTAGAACACCGGAT   | miRNA | miR-140 |
| t0037522 | 21 | 2 AACACAGGGTAGAACACCGGA     | miRNA | miR-140 |
| t0037528 | 22 | 2 ACGACAGGGTAGAACACGGAA     | miRNA | miR-140 |
| t0037535 | 22 | 2 ACCACAGGGTAGAACCTCGGAA    | miRNA | miR-140 |
| t0037604 | 22 | 2 ACCACAGGGTAGACCCACGGAT    | miRNA | miR-140 |

|          |    |                              |       |         |
|----------|----|------------------------------|-------|---------|
| t0037616 | 22 | 2 ACCACAGGGTAGAATCACGGCC     | miRNA | miR-140 |
| t0037659 | 23 | 2 ACCACAGGGTAGAACCAAGGACT    | miRNA | miR-140 |
| t0037739 | 24 | 2 TACCACAGGGTAGAACCACGGATG   | miRNA | miR-140 |
| t0037759 | 20 | 2 ACCACGGGGTAGAACCACGG       | miRNA | miR-140 |
| t0037767 | 23 | 2 TAGCACAGGGTAGAACCACGGAT    | miRNA | miR-140 |
| t0037776 | 22 | 2 ACCACAGGGTAGAACAAAGGAA     | miRNA | miR-140 |
| t0037790 | 22 | 2 ACCACAGGTTAGAACCACGGAC     | miRNA | miR-140 |
| t0037826 | 23 | 2 TACCACAGGGTAGAACCCCGGTA    | miRNA | miR-140 |
| t0037849 | 22 | 2 TACCACAGGGGATAACCACGGA     | miRNA | miR-140 |
| t0037902 | 24 | 2 TACCACAGGGTCGAACCACGGACA   | miRNA | miR-140 |
| t0037918 | 22 | 2 ACCACTGGGTAGAACCACGGAT     | miRNA | miR-140 |
| t0037921 | 23 | 2 ACCAAAGGGTAGAACCACGGAAT    | miRNA | miR-140 |
| t0037941 | 22 | 2 ACCACAGAGTAGAACCACGGAT     | miRNA | miR-140 |
| t0037961 | 24 | 2 TACCATAGGGTAGAACCACGGACG   | miRNA | miR-140 |
| t0037963 | 23 | 2 ACCACAGGGTAGAACCAACGGAAA   | miRNA | miR-140 |
| t0037974 | 24 | 2 TACCACAGGGTAGAACCCCGGATC   | miRNA | miR-140 |
| t0038065 | 22 | 2 ACCACAGGGGAGAACCACGGCC     | miRNA | miR-140 |
| t0038103 | 22 | 2 TACCACAGGGTAGAACCGCGGC     | miRNA | miR-140 |
| t0038107 | 22 | 2 TACCAAAGGGTAGAAACACGGA     | miRNA | miR-140 |
| t0038183 | 22 | 2 TACCACAGGCTAGAACCPCCGGA    | miRNA | miR-140 |
| t0038220 | 22 | 2 ACCACAGGGTAGAGCCACGGAA     | miRNA | miR-140 |
| t0038305 | 23 | 2 TACCACAAGGTAGAACCACGGCC    | miRNA | miR-140 |
| t0038318 | 24 | 2 TACCACAGGGTAGAAACACGGAAT   | miRNA | miR-140 |
| t0038378 | 22 | 2 ACCACAGGGTAGAACCACGCAA     | miRNA | miR-140 |
| t0038410 | 23 | 2 ACCACAGGGTAGAAACACGGACG    | miRNA | miR-140 |
| t0038431 | 23 | 2 ACCACAGGGTAGAACCAAGGAAG    | miRNA | miR-140 |
| t0038450 | 22 | 2 TACCACAGGGGAGAACTACGGA     | miRNA | miR-140 |
| t0038486 | 24 | 2 TACCTCAGGGTAGAACACGGAAA    | miRNA | miR-140 |
| t0038523 | 23 | 2 TACCACAGGGTAGAAACACGGCC    | miRNA | miR-140 |
| t0038524 | 22 | 2 TACCACAGGGTAGCACCCCGGA     | miRNA | miR-140 |
| t0038546 | 23 | 2 ACCACGGGGTAGAACCACGGACT    | miRNA | miR-140 |
| t0038563 | 21 | 2 ACCACAGGGGAGAACCAAGGA      | miRNA | miR-140 |
| t0038636 | 21 | 2 ACCACAGGGGAGAACTACGGA      | miRNA | miR-140 |
| t0038664 | 22 | 2 TACCACAGGGTAGAACTAAGGA     | miRNA | miR-140 |
| t0038742 | 20 | 2 ACCACAGGGTAGAACCACCG       | miRNA | miR-140 |
| t0038765 | 21 | 2 ACCACAGGGTAGAACTAAGGA      | miRNA | miR-140 |
| t0038772 | 22 | 2 CCACAGGGTAGAACCAAGGACA     | miRNA | miR-140 |
| t0038788 | 21 | 2 ACACAGGGTAGAACCACGGAC      | miRNA | miR-140 |
| t0038807 | 23 | 2 ACCACAGGGTAGAGCCACGGACA    | miRNA | miR-140 |
| t0038849 | 22 | 2 ACCACAGGGCAGAACCACGGAG     | miRNA | miR-140 |
| t0039010 | 24 | 2 TACGACAGGGTAGAACCACGGACA   | miRNA | miR-140 |
| t0039033 | 24 | 2 TACCACAGGGCAGAACCACGGAAA   | miRNA | miR-140 |
| t0039134 | 23 | 2 ACCACAAGGTAGAACCACGGACG    | miRNA | miR-140 |
| t0039210 | 22 | 2 ACCACAGGGTATAACCACGGAT     | miRNA | miR-140 |
| t0039219 | 24 | 2 TACCACAGGGTAGAACAGGGAAA    | miRNA | miR-140 |
| t0039251 | 24 | 2 TACCACCGGGTAGAACACGGATA    | miRNA | miR-140 |
| t0039274 | 23 | 2 TTCCACAGGGTAGAACACGGAC     | miRNA | miR-140 |
| t0039321 | 24 | 2 TACCACAGGGTAGAACTCCGGACA   | miRNA | miR-140 |
| t0039327 | 22 | 2 TACAACAGGGTAGAACCCCGGA     | miRNA | miR-140 |
| t0039371 | 25 | 2 TACCACAGGGTAGAACAAACGGACAA | miRNA | miR-140 |
| t0039392 | 23 | 2 ACCGCAGGGTAGAACACGGACT     | miRNA | miR-140 |
| t0039401 | 21 | 2 CCACAGGGTAGAACAAACGGAT     | miRNA | miR-140 |
| t0039408 | 22 | 2 TACCACAGGGTGGAACTACGGA     | miRNA | miR-140 |
| t0039409 | 24 | 2 TACCAGAGGGTAGAACACGGCCA    | miRNA | miR-140 |
| t0039424 | 24 | 2 TACCACAGGGCAGAACCACGGACG   | miRNA | miR-140 |
| t0039470 | 21 | 2 ACCACAGGGTAGAACTACAGA      | miRNA | miR-140 |
| t0039471 | 23 | 2 TGCCACAGGGTAGAACCCCGGAC    | miRNA | miR-140 |
| t0039509 | 23 | 2 TACCACAGGGTAGAAACAAGGAT    | miRNA | miR-140 |

|          |    |                              |       |           |
|----------|----|------------------------------|-------|-----------|
| t0039558 | 22 | 2 TACCATAGGGTAGAACCACGGC     | miRNA | miR-140   |
| t0039564 | 23 | 2 ACCACAGGGTAGAACCTCGGACT    | miRNA | miR-140   |
| t0039610 | 22 | 2 TCCACAGGGTAGAACCACGGAA     | miRNA | miR-140   |
| t0039638 | 20 | 2 ACCACACGGTAGAACCACGG       | miRNA | miR-140   |
| t0039654 | 22 | 2 ACCACAGGGTCAACCACGGAC      | miRNA | miR-140   |
| t0039671 | 22 | 2 TATCACAGGGTAGAACCACGGC     | miRNA | miR-140   |
| t0039686 | 20 | 2 ACCACAGGGTAGAACCGCGG       | miRNA | miR-140   |
| t0039739 | 24 | 2 TACCACAGGGTAGAACCAACGGACG  | miRNA | miR-140   |
| t0039742 | 21 | 2 GCCACAGGGTAGAACTACGGA      | miRNA | miR-140   |
| t0039747 | 24 | 2 TACCATAGGGTAGAACCAAGGACA   | miRNA | miR-140   |
| t0039768 | 22 | 2 TATCACAGGGTAGAACCCCGGA     | miRNA | miR-140   |
| t0039774 | 21 | 2 TACCACAGGGTAGAACCACAG      | miRNA | miR-140   |
| t0039786 | 22 | 2 ACCACAGGGTAGAACCACGGGG     | miRNA | miR-140   |
| t0039859 | 23 | 2 ACCACAGGGGAAGAACCACGGAAA   | miRNA | miR-140   |
| t0039862 | 21 | 2 TACCACAGGGTAGAACCACGA      | miRNA | miR-140   |
| t0039891 | 20 | 2 TACCACAGGGTAGAACACG        | miRNA | miR-140   |
| t0039923 | 22 | 2 TACCACAGGGTAGAACCCGGA      | miRNA | miR-140   |
| t0040000 | 23 | 2 ACCACAGGGGAACAACCACGGACA   | miRNA | miR-140   |
| t0040020 | 23 | 2 TACCACAGGGCAGAACAACGGAC    | miRNA | miR-140   |
| t0040035 | 24 | 2 TACCACAGGGTAGAACCAAGGACT   | miRNA | miR-140   |
| t0040114 | 23 | 2 ACCACAGGGTAGAAACACGGATA    | miRNA | miR-140   |
| t0040133 | 23 | 2 ACCACAGGGCAGAACCACGGACG    | miRNA | miR-140   |
| t0040144 | 20 | 2 ACCACAGGGTAGGACCACGG       | miRNA | miR-140   |
| t0040161 | 21 | 2 TACCACAGGGTAGTACCACGG      | miRNA | miR-140   |
| t0040171 | 22 | 2 ACCACAGGGTACAACCACGGAT     | miRNA | miR-140   |
| t0040175 | 22 | 2 TAACACAGGGTAGAACCAAGGA     | miRNA | miR-140   |
| t0040215 | 21 | 2 ACCAAAGGGTAGAACCAACGGA     | miRNA | miR-140   |
| t0040216 | 24 | 2 TACCACAGGGTAGAAACACGGAAA   | miRNA | miR-140   |
| t0040227 | 21 | 2 ACTACAGGGTAGAACCCCGGA      | miRNA | miR-140   |
| t0040279 | 23 | 2 TACCACAGGGTAGAAACCCGGAA    | miRNA | miR-140   |
| t0040294 | 20 | 2 ACCACAGGGTAGAACAGGA        | miRNA | miR-140   |
| t0040309 | 22 | 2 ACCACAGGGTAGAACACGTAC      | miRNA | miR-140   |
| t0040312 | 22 | 2 AGCACAGGGTAGAACACGGAA      | miRNA | miR-140   |
| t0040368 | 22 | 2 TACCACAGGGGAGAACCACGGT     | miRNA | miR-140   |
| t0040370 | 22 | 2 TACCACGGGGTAGAACTACGGA     | miRNA | miR-140   |
| t0040407 | 21 | 2 ACCACAGGGTGAATCACGGA       | miRNA | miR-140   |
| t0040449 | 22 | 2 CAGTGCAATGATGAAAAGGCAT     | miRNA | miR-130b  |
| t0040485 | 21 | 2 CAGAGCAATGTAAAAGGGCA       | miRNA | miR-130a  |
| t0040497 | 21 | 2 CGGTGCAATGTAAAAGGGCA       | miRNA | miR-130a  |
| t0040512 | 22 | 2 CAGTGCGATGTAAAAGGGCAT      | miRNA | miR-130a  |
| t0040543 | 20 | 2 ACTCGGCGTGCCGTCGGCCG       | miRNA | miR-1307  |
| t0040559 | 20 | 2 ACTCGGCGTGGAGTCGGTCG       | miRNA | miR-1307  |
| t0040560 | 22 | 2 ACTCGGCGTGGCGTCGGTAGTG     | miRNA | miR-1307  |
| t0040592 | 18 | 2 TCCTGTGAGGTTGGCATT         | miRNA | miR-1294  |
| t0040605 | 24 | 2 TCTGGGCACCAAAGTGAGACCTGA   | miRNA | miR-1285  |
| t0040619 | 21 | 2 TCACAGTGAACCGGTCTATTT      | miRNA | miR-128   |
| t0040627 | 21 | 2 TCCCTGAGACTGATAATTGCT      | miRNA | miR-125b  |
| t0040637 | 22 | 2 CGGATGAACAAAGAAAGTGTT      | miRNA | miR-1255b |
| t0040651 | 21 | 2 GTGGGCGGGGCAGGGGTGTG       | miRNA | miR-1228* |
| t0037804 | 21 | 2 GTGAGGACTCGGGAGGAGGAG      | miRNA | miR-1224  |
| t0035342 | 20 | 2 GTAAGGACTCGGGAGGTGGA       | miRNA | miR-1224  |
| t0037987 | 20 | 2 GTGAGGACTCGGGAGGCGGA       | miRNA | miR-1224  |
| t0040469 | 22 | 2 TGGAGTGTGACAATGGGGTTTG     | miRNA | miR-122   |
| t0035354 | 26 | 2 TACCCTGTAGAACCGAATTTGTGATC | miRNA | miR-10d   |
| t0037516 | 20 | 2 AGCAGCATTGTACAGGACTT       | miRNA | miR-107b  |
| t0038276 | 22 | 2 AGCAGCCTTGTACAGGGCTATA     | miRNA | miR-107   |
| t0035967 | 22 | 2 AGCAGCATTGTGCAGGGCTATT     | miRNA | miR-107   |
| t0035223 | 22 | 2 AGCGGCATTGTACAGGGCTATA     | miRNA | miR-107   |

|          |    |                             |       |           |
|----------|----|-----------------------------|-------|-----------|
| t0040141 | 22 | 2 AGCAGCGTTGTACAGGGCTATT    | miRNA | miR-107   |
| t0037772 | 22 | 2 AGCAGCATTGTACAAGGCTATT    | miRNA | miR-107   |
| t0036310 | 22 | 2 AGCAGCATTGTACAGGGCTCTA    | miRNA | miR-107   |
| t0036988 | 20 | 2 CCGCACTGTGGGTAATTGCT      | miRNA | miR-106b* |
| t0036041 | 20 | 2 CCGCACTGTGGGAACTTGCT      | miRNA | miR-106b* |
| t0036568 | 22 | 2 TACCGCAATGTGGGTA CTTGCT   | miRNA | miR-106b* |
| t0037027 | 22 | 2 TACCGCACTGTGGGTA CTTGCT   | miRNA | miR-106b* |
| t0039463 | 22 | 2 TACCGCACTGTAGGTA CTTGCT   | miRNA | miR-106b* |
| t0035973 | 24 | 2 CCGCACTGTGGGTA CTTGCTGCAA | miRNA | miR-106b* |
| t0040016 | 22 | 2 TAAAGTGCTGACAGAGCAGATA    | miRNA | miR-106b  |
| t0036981 | 21 | 2 TAAAGTGCTGACAGTGC GGAA    | miRNA | miR-106b  |
| t0038108 | 20 | 2 TAAAGTGTTGACAGTGC AGA     | miRNA | miR-106b  |
| t0038363 | 21 | 2 TAAAGTACTGACAGTGC AGAT    | miRNA | miR-106b  |
| t0039607 | 21 | 2 TAAAGTGCTGACAGTGC GAGAT   | miRNA | miR-106b  |
| t0039759 | 21 | 2 TAAAGTGCTGAGAGTGC AGAT    | miRNA | miR-106b  |
| t0040295 | 19 | 2 TAAAGTGCTGACAGTGC CG      | miRNA | miR-106b  |
| t0035216 | 20 | 2 TAAAGTGCTGCCAGTGC AGA     | miRNA | miR-106b  |
| t0036995 | 20 | 2 TAGAGTGCTGACAGTGC AGA     | miRNA | miR-106b  |
| t0037455 | 21 | 2 TAAAGTGCTGAAAGTGC AGAT    | miRNA | miR-106b  |
| t0037774 | 20 | 2 TAAAGTGCCGACAGTGC AGA     | miRNA | miR-106b  |
| t0038261 | 20 | 2 TACAGTGCTGACAGTGC AGA     | miRNA | miR-106b  |
| t0039524 | 23 | 2 AAAAGTGCTTACAGAGCAGG TAG  | miRNA | miR-106   |
| t0036207 | 22 | 2 AAAAGTGATTACAGTGCAGG TA   | miRNA | miR-106   |
| t0036221 | 21 | 2 AAAAGTGCTTACAGCGCAGG T    | miRNA | miR-106   |
| t0037086 | 23 | 2 AAAAGTGCTTACAGTGC CGGTAG  | miRNA | miR-106   |
| t0037103 | 21 | 2 AAAAGTGCTTACAGTGAAGG T    | miRNA | miR-106   |
| t0037209 | 21 | 2 AAAAGTGCTTACAGTGC GAGG    | miRNA | miR-106   |
| t0037286 | 23 | 2 AGAAGTGCTTACAGTGCAGG TAG  | miRNA | miR-106   |
| t0037358 | 21 | 2 AGCAGCAATGTACAGGGCT AT    | miRNA | miR-103a  |
| t0037851 | 20 | 2 AGCAGCATTTTACAGGGCT A     | miRNA | miR-103a  |
| t0037981 | 21 | 2 AGCAGCATTGTACAGGGGATA A   | miRNA | miR-103a  |
| t0038027 | 23 | 2 AGCAGCGTTGTACAGGGCTATGT   | miRNA | miR-103a  |
| t0038669 | 19 | 2 AGCAGCATTGGACAGGGCT       | miRNA | miR-103a  |
| t0038755 | 23 | 2 AGCAGCATTGTACAGGGCTACGT   | miRNA | miR-103a  |
| t0035970 | 23 | 2 AGCAGCATAGTACAGGGCTATGA   | miRNA | miR-103a  |
| t0036034 | 23 | 2 AGGAGCATTGTACAGGGCTATGT   | miRNA | miR-103a  |
| t0037949 | 23 | 2 AGCAGCATTGTACAGGGCAATGA   | miRNA | miR-103a  |
| t0038391 | 23 | 2 AGCAGCTTTGTACAGGGCTATGA   | miRNA | miR-103a  |
| t0038892 | 23 | 2 AGCAGCATTGTATAGGGCTATGT   | miRNA | miR-103a  |
| t0039476 | 21 | 2 AGCAGCATTGTACAGGGCTAC     | miRNA | miR-103a  |
| t0039601 | 24 | 2 TAGCAGCATTGTACAGGGCTATGA  | miRNA | miR-103a  |
| t0035244 | 23 | 2 AGCAGCATCGTACAGGGCTATGT   | miRNA | miR-103a  |
| t0035436 | 22 | 2 AGAAGAATTGTACAGGGCTATG    | miRNA | miR-103a  |
| t0035481 | 24 | 2 AAGCAGCATTGTACAGGGCTCTGA  | miRNA | miR-103a  |
| t0035550 | 24 | 2 AGCAGGATTGTACAGGGCTATGAA  | miRNA | miR-103a  |
| t0035552 | 22 | 2 AGAAACATTGTACAGGGCTATG    | miRNA | miR-103a  |
| t0035682 | 20 | 2 AGCAGCAATGTACAGGGCTA      | miRNA | miR-103a  |
| t0035913 | 23 | 2 AGCAGCATTGTACCGGGCTATGT   | miRNA | miR-103a  |
| t0035943 | 23 | 2 AGCAGCATTGTACTGGGCTATGT   | miRNA | miR-103a  |
| t0035965 | 24 | 2 AGAAGCATTGTACAGGGCTATGAA  | miRNA | miR-103a  |
| t0035997 | 21 | 2 AGCAGCATTGTCAGGGCTAT      | miRNA | miR-103a  |
| t0036040 | 23 | 2 AGCAGCATTTTACAGGGCTATGA   | miRNA | miR-103a  |
| t0036222 | 23 | 2 AGCAGCATTGTGCAGGGCTATGT   | miRNA | miR-103a  |
| t0036709 | 19 | 2 AGCAGCATTGTAAGGGCT        | miRNA | miR-103a  |
| t0036946 | 24 | 2 AGCAGCATTGTACCGGGCTATGAT  | miRNA | miR-103a  |
| t0037048 | 23 | 2 AGCAGCATTGTACAGGTCTATGA   | miRNA | miR-103a  |
| t0037352 | 20 | 2 AGCAGCTTTGTACAGGGCTA      | miRNA | miR-103a  |
| t0037510 | 22 | 2 AGAAGCATTGTAAGGGCTATG     | miRNA | miR-103a  |

|          |    |                               |       |          |
|----------|----|-------------------------------|-------|----------|
| t0037811 | 20 | 2 AGCAGCATTGTAGAGGGCTA        | miRNA | miR-103a |
| t0037846 | 22 | 2 AGCAGCTTTGTACAGGGCTATG      | miRNA | miR-103a |
| t0037864 | 22 | 2 TAGCAGCATTGTACAGGGCTAT      | miRNA | miR-103a |
| t0038443 | 23 | 2 AGCGGCATTGTACAGGGCTATGT     | miRNA | miR-103a |
| t0038548 | 23 | 2 AGCAGCCTTGTACAGGGCTATGT     | miRNA | miR-103a |
| t0038677 | 21 | 2 GAACAGTACTGTGATAACTGA       | miRNA | miR-101c |
| t0038813 | 22 | 2 CACAGTACTGTGATAACTGATT      | miRNA | miR-101c |
| t0038972 | 21 | 2 CAGTACTGTGATAACTGAAGA       | miRNA | miR-101c |
| t0039107 | 26 | 2 GGACAGTACTGTGATAACTGACGGGT  | miRNA | miR-101c |
| t0039149 | 22 | 2 CACAGTACTGTGATAACTGAAA      | miRNA | miR-101c |
| t0039187 | 22 | 2 TACAGTACTGTGATAAATGACT      | miRNA | miR-101c |
| t0039496 | 22 | 2 TACAGTACTATGATAACTGAAA      | miRNA | miR-101b |
| t0039811 | 22 | 2 GTACAGTCCTGTGATAACTGAA      | miRNA | miR-101  |
| t0039868 | 22 | 2 GTACAGTACGGTGATAACTGAA      | miRNA | miR-101  |
| t0039914 | 22 | 2 TACAGTACTGAGATAACTGAAG      | miRNA | miR-101  |
| t0040192 | 21 | 2 GTACAGTACTGTGGTAACTGA       | miRNA | miR-101  |
| t0040395 | 22 | 2 TACAGTACTGTGATAGCTGAAA      | miRNA | miR-101  |
| t0040583 | 22 | 2 TACAATACTGTGATAACTGAAG      | miRNA | miR-101  |
| t0036144 | 21 | 2 GTACAGTACTGTGTTAACTGA       | miRNA | miR-101  |
| t0036684 | 22 | 2 GTACTGTACTGTGATAACTGAA      | miRNA | miR-101  |
| t0037852 | 22 | 2 GTACCGTACTGTGATAACTGAA      | miRNA | miR-101  |
| t0038366 | 22 | 2 TATAGTACTGTGATAACTGAAG      | miRNA | miR-101  |
| t0039278 | 20 | 2 TACCGTACTGTGATAACTGA        | miRNA | miR-101  |
| t0040199 | 23 | 2 GTACAGTACTGTGATAACTGCAA     | miRNA | miR-101  |
| t0037622 | 26 | 2 TACAGTACTGTGATAACTGAAAGTGCC | miRNA | miR-101  |
| t0035196 | 21 | 2 GTACAGTACTGTCATAACTGA       | miRNA | miR-101  |
| t0035228 | 22 | 2 GTACAGTACTGTGATCACTGAA      | miRNA | miR-101  |
| t0035259 | 21 | 2 TACAGTACTGTGATAACAGAA       | miRNA | miR-101  |
| t0035351 | 20 | 2 TACAGTACTGTGATAGCTGA        | miRNA | miR-101  |
| t0035478 | 21 | 2 TACAGTACTGTGATATCTGAA       | miRNA | miR-101  |
| t0035543 | 22 | 2 TACAGTACTGTGACAACAGAAA      | miRNA | miR-101  |
| t0035588 | 21 | 2 GTACAGTACTGTGATGACTGA       | miRNA | miR-101  |
| t0035617 | 22 | 2 GTACAGTACTGTGATAACTGTA      | miRNA | miR-101  |
| t0035721 | 22 | 2 TACGGTACTGTGATAACTGAAA      | miRNA | miR-101  |
| t0035772 | 22 | 2 TACAGTACTGTGATAATTGAAG      | miRNA | miR-101  |
| t0035797 | 22 | 2 TACAGTACTGTAATAACTGAAG      | miRNA | miR-101  |
| t0035991 | 21 | 2 GTACAGTACTGTGATACCTGA       | miRNA | miR-101  |
| t0036053 | 23 | 2 ATACAGTACTGTGATAACTGAAT     | miRNA | miR-101  |
| t0036064 | 22 | 2 TACAGTGCTGTGATAACTGAAG      | miRNA | miR-101  |
| t0036166 | 20 | 2 TACAGTACTGTGATAACTTA        | miRNA | miR-101  |
| t0036353 | 20 | 2 TACAGTACTGTGATGACTGA        | miRNA | miR-101  |
| t0036562 | 25 | 2 TACAGTACTGTGATAACTGAAAAAA   | miRNA | miR-101  |
| t0036735 | 23 | 2 GTACAGTACTGTGGTAACTGAAA     | miRNA | miR-101  |
| t0036787 | 22 | 2 GTACAGTACTCTGATAACTGAA      | miRNA | miR-101  |
| t0037246 | 20 | 2 TACAGTACTGAGATAACTGA        | miRNA | miR-101  |
| t0037762 | 22 | 2 GTACAGTACTGTGATAACAGAA      | miRNA | miR-101  |
| t0037766 | 21 | 2 GTACAGTACTGTGATAACTGT       | miRNA | miR-101  |
| t0037867 | 22 | 2 TACAGTACTGTGATAATTGAAA      | miRNA | miR-101  |
| t0037977 | 22 | 2 TACAGTACTGAGATAACTGAAA      | miRNA | miR-101  |
| t0038059 | 20 | 2 TACAGTAGTGTGATAACTGA        | miRNA | miR-101  |
| t0038092 | 22 | 2 TACAGTCCTGTGATAACTGAAA      | miRNA | miR-101  |
| t0038182 | 20 | 2 TACAGTGCTGTGATAACTGA        | miRNA | miR-101  |
| t0038491 | 21 | 2 GTAAAGTACTGTGATAACTGA       | miRNA | miR-101  |
| t0038731 | 20 | 2 TACAGTACTGTGAAAACTGA        | miRNA | miR-101  |
| t0039018 | 20 | 2 TACAGTACTGTGCTAACTGA        | miRNA | miR-101  |
| t0039021 | 21 | 2 GTACAATACTGTGATAACTGA       | miRNA | miR-101  |
| t0039267 | 24 | 2 TACAGTACTGTGATAAATGAAGAA    | miRNA | miR-101  |
| t0039313 | 23 | 2 ATACAGTACTGTGATAACTGAAA     | miRNA | miR-101  |

|          |    |                             |       |        |
|----------|----|-----------------------------|-------|--------|
| t0039412 | 25 | 2 TGGAATGTAAAGAAGTGGGTATATC | miRNA | miR-1  |
| t0039712 | 25 | 2 TGGAATGTAAAGAAGTGTGTATGTC | miRNA | miR-1  |
| t0039725 | 22 | 2 TGAGGTAGTAGATTGAATACTT    | miRNA | let-7k |
| t0039749 | 23 | 2 TGAGGTAGTAGATTGAATAGTTT   | miRNA | let-7k |
| t0039847 | 22 | 2 TCAGGTAGTAGTTTGTGCTGTT    | miRNA | let-7i |
| t0039947 | 20 | 2 TGAGGTAGTAGTTTGTGCTA      | miRNA | let-7i |
| t0039975 | 20 | 2 TGAGGTAGTAGCTTGTGCTG      | miRNA | let-7i |
| t0040008 | 20 | 2 TGAGGGAGTAGTTTGTGCTT      | miRNA | let-7i |
| t0040244 | 21 | 2 TGAGGTAGTAGTTTGTGCCGT     | miRNA | let-7i |
| t0040269 | 20 | 2 TGACGTAGTAGTTTGTGCTG      | miRNA | let-7i |
| t0040282 | 19 | 2 TGAGGTAGTAGATTGTGCT       | miRNA | let-7i |
| t0040505 | 21 | 2 TGAGGTAGTAGTTTTTGTGCTGT   | miRNA | let-7i |
| t0040536 | 20 | 2 TGAGGTAGTAGTTTCTGCTG      | miRNA | let-7i |
| t0038826 | 18 | 2 TGAGGGAGTAGTTTGTGC        | miRNA | let-7i |
| t0039905 | 21 | 2 TGAGGTAGTAGTTTCTGCTGT     | miRNA | let-7i |
| t0037105 | 22 | 2 TGAGGTAGTAGTTTGTGCTGCT    | miRNA | let-7i |
| t0039077 | 20 | 2 TGAGCTAGTAGTTTGTGCTG      | miRNA | let-7i |
| t0035215 | 21 | 2 CGAGGTAGTAGTTTGTGCTGT     | miRNA | let-7i |
| t0035226 | 23 | 2 TGAGGGAGTAGTTTGTGCTGTAA   | miRNA | let-7i |
| t0035330 | 23 | 2 TGAGGTAGCAGTTTGTGCTGTTA   | miRNA | let-7i |
| t0035582 | 22 | 2 TGAGGTAGTAGTGTGTGCTGTT    | miRNA | let-7i |
| t0035690 | 23 | 2 TGAGGTAAGTAGTTTGTGCTGTTT  | miRNA | let-7i |
| t0036022 | 23 | 2 TGGGGTAGTAGTTTGTGCTGTTA   | miRNA | let-7i |
| t0036194 | 22 | 2 TGAGGTAGTACTTTGTGCTGTT    | miRNA | let-7i |
| t0036259 | 20 | 2 TGAGGTAGTAGTTTGGGCTG      | miRNA | let-7i |
| t0036405 | 20 | 2 TGAGGTAGTAGTCTGTGCTG      | miRNA | let-7i |
| t0036421 | 21 | 2 TGAGGTAGTAGTTCGTGCTGT     | miRNA | let-7i |
| t0036587 | 19 | 2 TGGGGTAGTAGTTTGTGCT       | miRNA | let-7i |
| t0036694 | 19 | 2 TGAGGTAGTAGTTTGTGGT       | miRNA | let-7i |
| t0037117 | 23 | 2 TGAGGTAGTAGTTTGTGCTGGTT   | miRNA | let-7i |
| t0037427 | 22 | 2 TGAGTTAGTAGTTTGTGCTGTT    | miRNA | let-7i |
| t0037442 | 23 | 2 TGAGGAAGTAGTTTGTGCTGTTA   | miRNA | let-7i |
| t0037565 | 22 | 2 TGAGGTAGTAGTTTGTGCTGAT    | miRNA | let-7i |
| t0037658 | 23 | 2 TGGGGTAGTAGTTTGTGCTGTTT   | miRNA | let-7i |
| t0037691 | 21 | 2 TGAGGTAGCAGTTTGTGCTGT     | miRNA | let-7i |
| t0037742 | 19 | 2 TGAGGTAGTAGATTGTGGT       | miRNA | let-7i |
| t0038144 | 22 | 2 TGAGGTAGTAGTTTCTGCTGTT    | miRNA | let-7i |
| t0038283 | 20 | 2 TGGGGTAGTAGTTTGTGCTG      | miRNA | let-7i |
| t0038473 | 19 | 2 TGAGGTAGTAGCTTGTGCT       | miRNA | let-7i |
| t0038767 | 20 | 2 CGAGGTAGTAGTTTGTGCTG      | miRNA | let-7i |
| t0038824 | 23 | 2 TGAGGTGGTAGTTTGTGCTGTTT   | miRNA | let-7i |
| t0038828 | 20 | 2 TGAGGTAGTAGTTTGTACCG      | miRNA | let-7g |
| t0038949 | 22 | 2 TGAGGTAGTAGTTGGTACAGTT    | miRNA | let-7g |
| t0039014 | 23 | 2 TGAGGAAGTAGTTTGTACAGTTA   | miRNA | let-7g |
| t0039399 | 21 | 2 GAGGGAGTAGTTTGTACAGTT     | miRNA | let-7g |
| t0039475 | 23 | 2 TGAGGGAGTAGTTTGTACAGTTG   | miRNA | let-7g |
| t0039545 | 22 | 2 TGAGGTAGGAGTTTGTGCAGTT    | miRNA | let-7g |
| t0039640 | 20 | 2 TGAGGTAGGAGTTTGTACAG      | miRNA | let-7g |
| t0039864 | 21 | 2 TGTGGTAGTAGTTTGTACAGT     | miRNA | let-7g |
| t0040149 | 22 | 2 TGAGGTAGTAGTTTGTACCGTA    | miRNA | let-7g |
| t0040302 | 22 | 2 TGAGGGAGTAGTTTGTGCAGTT    | miRNA | let-7g |
| t0040306 | 23 | 2 TGAGGTAGTAGTTTGTAAAGTTA   | miRNA | let-7g |
| t0040342 | 20 | 2 TGAGGTAGAAGTTTGTACAG      | miRNA | let-7g |
| t0040419 | 23 | 2 TGAGGTAATAGTTTGTACAGTTA   | miRNA | let-7g |
| t0036155 | 22 | 2 TGAGGTAGTAGTGTGTACAGTT    | miRNA | let-7g |
| t0036261 | 21 | 2 TGAGGTAGTAGTTTGAACAGT     | miRNA | let-7g |
| t0036315 | 21 | 2 TGAGGTAATAGTTTGTACAGT     | miRNA | let-7g |
| t0036373 | 22 | 2 TGAGGTAGTAGTTTGTACAGTG    | miRNA | let-7g |



|          |    |                            |       |           |
|----------|----|----------------------------|-------|-----------|
| t0036509 | 21 | 2 TGAGGTAGTAATTTGTACAGT    | miRNA | let-7g    |
| t0036768 | 20 | 2 TGAGGTAGTAGATTGTAGGT     | miRNA | let-7f-5p |
| t0036914 | 20 | 2 CGAGGTAGTAGATTGTATTT     | miRNA | let-7f-5p |
| t0036951 | 20 | 2 TGAGGTAGCAGATTGTATTT     | miRNA | let-7f-5p |
| t0037439 | 18 | 2 TGAGGTAGTGGATTGTAT       | miRNA | let-7f-5p |
| t0037496 | 22 | 2 TGAGGTAGTCGATTGTATCGTT   | miRNA | let-7f-5p |
| t0037567 | 22 | 2 TGAGGTAGTGGATTGTATTGTT   | miRNA | let-7f-5p |
| t0037705 | 22 | 2 TGAGGTAGTGGATTGTATATTT   | miRNA | let-7f-5p |
| t0038575 | 21 | 2 TGAGGTAGTGGATTGTATAGG    | miRNA | let-7f-5p |
| t0038626 | 21 | 2 TGAGGTAGTAGATTGTATCGG    | miRNA | let-7f-5p |
| t0038926 | 22 | 2 TGAGGTAGTAGATTGTATAGAG   | miRNA | let-7f-5p |
| t0039141 | 23 | 2 TGAGGTAGTAGATTGTATGGTAA  | miRNA | let-7f-5p |
| t0040168 | 22 | 2 TGAGGTAGTAGATTGTATCCTT   | miRNA | let-7f-5p |
| t0040241 | 22 | 2 TGAGGTAGTCGATTGTATAGGT   | miRNA | let-7f-5p |
| t0035697 | 21 | 2 TGAGGTAGTGGATTGTATAGA    | miRNA | let-7f-5p |
| t0035795 | 20 | 2 TAAGGTAGTAGATTGTATTT     | miRNA | let-7f-5p |
| t0036316 | 22 | 2 TGAGGTAGTGGTTTGTATAGTT   | miRNA | let-7f-5p |
| t0036530 | 22 | 2 TGAGGAAGTGGATTGTATAGTT   | miRNA | let-7f-5p |
| t0037091 | 20 | 2 TGAGGTAGTAGATTGTACGT     | miRNA | let-7f-5p |
| t0037266 | 18 | 2 TGAGGTAGTGGATTGTAG       | miRNA | let-7f-5p |
| t0037274 | 24 | 2 TGAGGTAGTAGATTGTATAGTGGC | miRNA | let-7f    |
| t0037901 | 22 | 2 TGGGGTAGTAGATTGTATAGCT   | miRNA | let-7f    |
| t0038008 | 22 | 2 TGAGGTAGCAGATTGTATAGCT   | miRNA | let-7f    |
| t0038062 | 23 | 2 TGAGGTAGTAGATTGTATAGATG  | miRNA | let-7f    |
| t0038126 | 23 | 2 TGAGGTAATAGATTGTATAGTTG  | miRNA | let-7f    |
| t0038389 | 21 | 2 GTAGTAGATTGTATAGTATGA    | miRNA | let-7f    |
| t0038465 | 21 | 2 TGAGGTAGTAGATTGTTTGGT    | miRNA | let-7f    |
| t0039179 | 21 | 2 TCGGTTAGTAGCTTGTATAGT    | miRNA | let-7f    |
| t0039198 | 23 | 2 TGTGGTAGTAGATTGTATAGTTG  | miRNA | let-7f    |
| t0039803 | 22 | 2 TGAGCTAGTAGATTGTATAGTA   | miRNA | let-7f    |
| t0039934 | 22 | 2 TGAGCTAGTAGATTGTGTAGTT   | miRNA | let-7f    |
| t0040384 | 22 | 2 TGAGGTAGAAGATTGTATACTT   | miRNA | let-7f    |
| t0040496 | 22 | 2 TGAGGTAGTAGCTTGTAAAGTT   | miRNA | let-7f    |
| t0035214 | 24 | 2 CGAGGTAGTAGATTGTATAGTTAA | miRNA | let-7f    |
| t0035257 | 23 | 2 TGAGGTAGTAGATTGTATTGTTT  | miRNA | let-7f    |
| t0035321 | 22 | 2 TGAGGTGGTAGATTGTATAGGT   | miRNA | let-7f    |
| t0035428 | 18 | 2 TCGGTTAGTAGATTGTAT       | miRNA | let-7f    |
| t0035474 | 21 | 2 TTGAGGAAGTAGATTGTATAG    | miRNA | let-7f    |
| t0035488 | 23 | 2 TGAGGTAGTAGATTTTATAGTTA  | miRNA | let-7f    |
| t0035512 | 21 | 2 GAGGTAGTAGATTGTATGGTT    | miRNA | let-7f    |
| t0035529 | 22 | 2 TGAGGTAGTATATTGTATAGGT   | miRNA | let-7f    |
| t0035554 | 23 | 2 TAAGGTAGTAGATTGTATAGTTG  | miRNA | let-7f    |
| t0035606 | 22 | 2 TGAGGTAGAAGATTGTATAGGT   | miRNA | let-7f    |
| t0035651 | 22 | 2 TGTGGTAGTAGATTGTATAGGT   | miRNA | let-7f    |
| t0035653 | 21 | 2 ATGAGGTAGTAGATTGTCTAG    | miRNA | let-7f    |
| t0035656 | 23 | 2 CTGAGGTAGTAGATTGTATAGTA  | miRNA | let-7f    |
| t0035677 | 24 | 2 TGAGGTAGTAGATTGTATGGTTGA | miRNA | let-7f    |
| t0035777 | 22 | 2 TGAGGTAGTAGATTGTACATTT   | miRNA | let-7f    |
| t0035799 | 20 | 2 GAGGTAGTAGATTGTATCGT     | miRNA | let-7f    |
| t0035871 | 22 | 2 TCGGTTAGTAGATTGTATAGGT   | miRNA | let-7f    |
| t0035878 | 21 | 2 TGAGGTAGTAGCTTGTGTAGT    | miRNA | let-7f    |
| t0035905 | 22 | 2 TGAGGTTGTAGATTGTTTAGTT   | miRNA | let-7f    |
| t0035916 | 21 | 2 TGAGGTACTAGATTGTGTAGT    | miRNA | let-7f    |
| t0035942 | 22 | 2 TGAAGTAGTAGATTGTATAGTA   | miRNA | let-7f    |
| t0036029 | 22 | 2 TGGGGTAGTAGATTGCATAGTT   | miRNA | let-7f    |
| t0036091 | 22 | 2 TGAGGTAGTAGCTTGTATATTT   | miRNA | let-7f    |
| t0036116 | 21 | 2 TGAGGTAGTATATTGTATAGG    | miRNA | let-7f    |
| t0036134 | 22 | 2 TGAGGCAGTAGATTATATAGTT   | miRNA | let-7f    |

|          |    |                           |       |        |
|----------|----|---------------------------|-------|--------|
| t0036282 | 22 | 2 TGAGGTAGAAGATTGTATATTT  | miRNA | let-7f |
| t0036313 | 22 | 2 TGAGGTAGCAGATTGTATAGGT  | miRNA | let-7f |
| t0036318 | 22 | 2 CGGGGTAGTAGATTGTATAGTT  | miRNA | let-7f |
| t0036361 | 23 | 2 TGAGGTAGTAGATTGTATAATTA | miRNA | let-7f |
| t0036367 | 20 | 2 AAGGTAGTAGATTGTATAGT    | miRNA | let-7f |
| t0036416 | 23 | 2 TGAGGTAGTCGATTGTATAGTTG | miRNA | let-7f |
| t0036439 | 22 | 2 TGAGGTAGTAGCTTGTATAGAT  | miRNA | let-7f |
| t0036501 | 21 | 2 TGAGGTAGTAGATTGCATAGA   | miRNA | let-7f |
| t0036540 | 21 | 2 TAGGTAGTAGATTGTATCGTT   | miRNA | let-7f |
| t0036567 | 23 | 2 TGAAGTAGTAGATTGTATAGTTT | miRNA | let-7f |
| t0036579 | 23 | 2 TGAGCTAGTAGATTGTATAGTTA | miRNA | let-7f |
| t0036580 | 23 | 2 AGAGGTAGTAGATTGTATAGTTA | miRNA | let-7f |
| t0036633 | 22 | 2 TGGGGTAGTAGCTTGTATAGTT  | miRNA | let-7f |
| t0036704 | 22 | 2 TGCGGTAGTAGATTGTCTAGTT  | miRNA | let-7f |
| t0036727 | 21 | 2 TGAGGTAGTAGCTTCTATAGT   | miRNA | let-7f |
| t0036730 | 22 | 2 TGAGGCAGTAGATTGCATAGTT  | miRNA | let-7f |
| t0036758 | 18 | 2 CGAGGTAGTAGATTGTAG      | miRNA | let-7f |
| t0036769 | 22 | 2 TGAGGTGGTAGATTATATAGTT  | miRNA | let-7f |
| t0036786 | 22 | 2 TGAGGTAGCAGATTGTTAGTT   | miRNA | let-7f |
| t0036913 | 22 | 2 TGAGGTAGTAGACTGTATAGGT  | miRNA | let-7f |
| t0036925 | 22 | 2 TGCGGTCGTAGATTGTATAGTT  | miRNA | let-7f |
| t0036986 | 20 | 2 TGAGGTAGTAGATTGCGTAG    | miRNA | let-7f |
| t0037013 | 23 | 2 TGAGGTAGTATATTGTATAGTTG | miRNA | let-7f |
| t0037028 | 22 | 2 TGAGGAAGCAGATTGTATAGTT  | miRNA | let-7f |
| t0037034 | 22 | 2 TGAGGTAGTAGATTGTAAAGTA  | miRNA | let-7f |
| t0037092 | 20 | 2 TGAGGTGGTAGATTGTGTAG    | miRNA | let-7f |
| t0037188 | 22 | 2 TGCGGTAGTAGATTGTTAGTT   | miRNA | let-7f |
| t0037226 | 22 | 2 TGAGGTGGAAGATTGTATAGTT  | miRNA | let-7f |
| t0037319 | 22 | 2 TGAGGTAGTAGATTGGAGAGTT  | miRNA | let-7f |
| t0037363 | 22 | 2 TGAGATAGTAGATTGTGTAGTT  | miRNA | let-7f |
| t0037364 | 21 | 2 TGGGGTAGTAGATTGTATTGT   | miRNA | let-7f |
| t0037406 | 23 | 2 TGAGGTAGTAGATTGTATAGATA | miRNA | let-7f |
| t0037490 | 18 | 2 TGAGGTAGTAGAATGTAG      | miRNA | let-7f |
| t0037499 | 22 | 2 TTGAGGAAGTAGATTGTATAGT  | miRNA | let-7f |
| t0037566 | 22 | 2 TGAGGTAGTAGATTGGATAGGT  | miRNA | let-7f |
| t0037633 | 22 | 2 TGAGGTAGTAGATTGTCTGGTT  | miRNA | let-7f |
| t0037634 | 22 | 2 TGAGGTAATAGATTGTATAGTA  | miRNA | let-7f |
| t0037645 | 23 | 2 TCAGGTAGTAGATTGTATAGTTA | miRNA | let-7f |
| t0037792 | 21 | 2 GAGGTAGTTGATTGTATAGTT   | miRNA | let-7f |
| t0037806 | 18 | 2 TGAGGTAGAAGATTGTAG      | miRNA | let-7f |
| t0037818 | 22 | 2 TGAGGAAGTAGATTGCATAGTT  | miRNA | let-7f |
| t0037834 | 21 | 2 TGAGGTAGTAGTTTGTATTGT   | miRNA | let-7f |
| t0037892 | 22 | 2 TGAGGTAGTAGATTGGGTAGTT  | miRNA | let-7f |
| t0037893 | 21 | 2 GAGGTAGTAGATTGTATAGTC   | miRNA | let-7f |
| t0037947 | 22 | 2 CGAGGTAGTAGATTGTGTAGTT  | miRNA | let-7f |
| t0038007 | 22 | 2 TGAGGTAGTAGATTGTGTAGGT  | miRNA | let-7f |
| t0038020 | 21 | 2 TGAGGTAGTCGCTTGTATAGT   | miRNA | let-7f |
| t0038051 | 23 | 2 TGAGGTAGTATATTGTATAGTTA | miRNA | let-7f |
| t0038067 | 23 | 2 TGAGGTAGAAGATTGTATAGTAA | miRNA | let-7f |
| t0038115 | 23 | 2 TGAGGTAGTAGTTTGTATAGTTT | miRNA | let-7f |
| t0038158 | 22 | 2 TGAGGTGGTAGATTGTATGGTT  | miRNA | let-7f |
| t0038187 | 22 | 2 TAAGGTAGTAGATTGTATATTT  | miRNA | let-7f |
| t0038193 | 22 | 2 TGAGGTGGTAGATCGTATAGTT  | miRNA | let-7f |
| t0038199 | 18 | 2 TGAGGTAGTAGCTTGTAT      | miRNA | let-7f |
| t0038232 | 22 | 2 TGGGGTAGTAGATTGTATAGGT  | miRNA | let-7f |
| t0038285 | 23 | 2 TGAGATAGTAGATTGTATAGTTT | miRNA | let-7f |
| t0038341 | 21 | 2 GAGGTCGTAGATTGTATAGTT   | miRNA | let-7f |
| t0038390 | 22 | 2 TGAGGTAGTAGATTGTCTAGGT  | miRNA | let-7f |

|          |    |                            |       |        |
|----------|----|----------------------------|-------|--------|
| t0038507 | 22 | 2 TGATGTAGTAGATTGTATGGTT   | miRNA | let-7f |
| t0038597 | 19 | 2 TGAGGTAGTAGATCGTATG      | miRNA | let-7f |
| t0038628 | 23 | 2 TGAGGTAGTAGATTGTATAGCTC  | miRNA | let-7f |
| t0038640 | 23 | 2 TGAGGTAGTACATTGTATAGTTT  | miRNA | let-7f |
| t0038644 | 22 | 2 TGAGGTACTAGATTGTATAGCT   | miRNA | let-7f |
| t0038719 | 23 | 2 TGAGGTAGTAGATTATATAGTTT  | miRNA | let-7f |
| t0038723 | 22 | 2 TGAGGCAGCAGATTGTATAGTT   | miRNA | let-7f |
| t0038795 | 19 | 2 TGAGGTAGTAGAATGTATA      | miRNA | let-7f |
| t0038838 | 22 | 2 TGAGGAAGTAGATTGGATAGTT   | miRNA | let-7f |
| t0038879 | 23 | 2 TCAGGTAGTAGATTGTATAGTTT  | miRNA | let-7f |
| t0038923 | 22 | 2 TGAGGTAGTCGATTGGATAGTT   | miRNA | let-7f |
| t0038948 | 21 | 2 TGAGGTAGTAGATTGCATATT    | miRNA | let-7f |
| t0038965 | 21 | 2 TGAGGAAGTAGATTGTGTAGT    | miRNA | let-7f |
| t0038989 | 22 | 2 TGGGGTAGTAGATTGTATACTT   | miRNA | let-7f |
| t0039027 | 21 | 2 TGGGGTAGTAGATTGTATAGC    | miRNA | let-7f |
| t0039075 | 22 | 2 TGAGGTAGCAGATTGTATATTT   | miRNA | let-7f |
| t0039096 | 22 | 2 TGAGGTCGTAGATTGTATAGTA   | miRNA | let-7f |
| t0039128 | 22 | 2 AGAGGTAGTAGATTGTATAGTA   | miRNA | let-7f |
| t0039190 | 23 | 2 TGAGGTAGTAGATTGTATCGTTT  | miRNA | let-7f |
| t0039197 | 22 | 2 TGAGGTAGTAGATCGTATGGTT   | miRNA | let-7f |
| t0039231 | 23 | 2 TGAAGTAGTAGATTGTATAGTTG  | miRNA | let-7f |
| t0039258 | 22 | 2 TGAGGTCGTAGATTGTATAGAT   | miRNA | let-7f |
| t0039284 | 21 | 2 TGAGGTAGTAGCTTGTATCGT    | miRNA | let-7f |
| t0039309 | 19 | 2 TGAGGTAGTCGATTGTATA      | miRNA | let-7f |
| t0039324 | 23 | 2 TGAGGTCGTAGATTGTATAGTTA  | miRNA | let-7f |
| t0039396 | 22 | 2 TGAGGTACTAGATTGTATAGTA   | miRNA | let-7f |
| t0039485 | 22 | 2 TGAGGTAGTAGATTATATAGTA   | miRNA | let-7f |
| t0039507 | 19 | 2 GAGGTAGTAGATTATATAG      | miRNA | let-7f |
| t0039578 | 23 | 2 TGAGGTAGTAGCTTGTATAGTTT  | miRNA | let-7f |
| t0039593 | 22 | 2 TTGAGGCAGTAGATTGTATAGT   | miRNA | let-7f |
| t0039597 | 22 | 2 TTAGGTGGTAGATTGTATAGTT   | miRNA | let-7f |
| t0039653 | 23 | 2 GGAGGTAGTAGATTGTATAGTTA  | miRNA | let-7f |
| t0039661 | 23 | 2 TGAGGTAGTAAATTGTATAGTTG  | miRNA | let-7f |
| t0039869 | 23 | 2 CTGAGGTAGAAGATTGTATAGTT  | miRNA | let-7f |
| t0039875 | 23 | 2 TGAGGTAGTAGATTCTATAGTTG  | miRNA | let-7f |
| t0039957 | 22 | 2 TGAGGTAGTAGATTACATAGTT   | miRNA | let-7f |
| t0039987 | 22 | 2 TGAGGTCGTAGATTGTGTAGTT   | miRNA | let-7f |
| t0040036 | 22 | 2 TGAGGTGGGAGATTGTATAGTT   | miRNA | let-7e |
| t0040090 | 21 | 2 TGAGGTAGGAGAGTGTATAGT    | miRNA | let-7e |
| t0040111 | 21 | 2 TGAGGTCGGAGATTGTATAGT    | miRNA | let-7e |
| t0040178 | 20 | 2 TGAGGTAGGAGATTGTATTT     | miRNA | let-7e |
| t0040205 | 22 | 2 TGAGATAGGAGATTGTATAGTT   | miRNA | let-7e |
| t0040338 | 18 | 2 TGAGGTAGGAGATTGTAG       | miRNA | let-7e |
| t0040355 | 22 | 2 TGAGGTAGGAGATTGTATAGTA   | miRNA | let-7e |
| t0040426 | 21 | 2 TGAGGTAGGAGATTGTGTAGT    | miRNA | let-7e |
| t0040437 | 19 | 2 AGAGGTAGTAGGTTGAATA      | miRNA | let-7d |
| t0040447 | 21 | 2 AGAGGTAGTACGTTGCATAGT    | miRNA | let-7d |
| t0040580 | 22 | 2 AGAGGTAGTAGGTTGCATAATT   | miRNA | let-7d |
| t0040586 | 23 | 2 AGAGGAAGTAGGTTGCATAGTTT  | miRNA | let-7d |
| t0040634 | 22 | 2 AGAGGTAGTGGGTTGCATAGTA   | miRNA | let-7d |
| t0035371 | 21 | 2 AGAGGTAGTAGGTTGCATAGA    | miRNA | let-7d |
| t0036025 | 22 | 2 AGATGTAGTAGGTTGCATAGTT   | miRNA | let-7d |
| t0036918 | 22 | 2 AGAGGTAGTAGGTTTCATAGTT   | miRNA | let-7d |
| t0037261 | 19 | 2 AGGGGTAGTAGGTTGCATA      | miRNA | let-7d |
| t0037451 | 23 | 2 AGAGGGAGTAGGTTGCATAGTTA  | miRNA | let-7d |
| t0038353 | 19 | 2 AGAGGTAGTAGATTGCATA      | miRNA | let-7d |
| t0038642 | 20 | 2 CGAGGTAGTAGGTTGCATAG     | miRNA | let-7d |
| t0038897 | 24 | 2 AGAGGTAGTAGGTTGCATAGTAGA | miRNA | let-7d |

|          |    |                              |       |        |
|----------|----|------------------------------|-------|--------|
| t0035225 | 22 | 2 AGAGGTAGTAGCTTGCATAGTT     | miRNA | let-7d |
| t0035278 | 21 | 2 AGATGTAGTAGGTTGCATAGT      | miRNA | let-7d |
| t0036158 | 23 | 2 AGAGGTAGTAGGGTGCATAGTTT    | miRNA | let-7d |
| t0036418 | 21 | 2 AGAGGTAGTAGGTTTCATAGT      | miRNA | let-7d |
| t0036485 | 21 | 2 AGAGGGAGTAGGGTGCATAGT      | miRNA | let-7d |
| t0036577 | 19 | 2 AGAGGTAGTAGGTCGCATA        | miRNA | let-7d |
| t0036665 | 23 | 2 AGAGGGAGTAGGTTGCATAGTTT    | miRNA | let-7d |
| t0036884 | 23 | 2 AGAGGTAGTAGGTTGAATAGTTA    | miRNA | let-7d |
| t0037061 | 20 | 2 AGAGGTAGTAGGTTGCAAAG       | miRNA | let-7d |
| t0037280 | 19 | 2 AGAGGTAGTAGGATGCATA        | miRNA | let-7d |
| t0037282 | 19 | 2 GGAGGTAGTAGGTTGCATA        | miRNA | let-7d |
| t0037325 | 21 | 2 AGACGTAGTAGGTTGCATAGT      | miRNA | let-7d |
| t0037478 | 25 | 2 TGAGGTAGTAGGATGTATGGTTATC  | miRNA | let-7c |
| t0037558 | 25 | 2 TGAGGTAGTAGCTTGTATGGTTATC  | miRNA | let-7c |
| t0037694 | 22 | 2 TGAGGTAGTAGGTTGCATGGTT     | miRNA | let-7c |
| t0038047 | 22 | 2 TGAGGAAGTAGGTTGTATGGTT     | miRNA | let-7c |
| t0038201 | 21 | 2 TGAGGTAGTAGCTTGTATGGT      | miRNA | let-7c |
| t0039446 | 25 | 2 CGAGGTAGTAGGTTGTATGGTTATC  | miRNA | let-7c |
| t0039568 | 25 | 2 TGAGGTAGTAGGTTGCATGGTTATC  | miRNA | let-7c |
| t0039647 | 22 | 2 TGAGGTAGTAGGTTGGATGGTT     | miRNA | let-7c |
| t0039651 | 22 | 2 TGAGGTAGTAGGTTATATGGTT     | miRNA | let-7c |
| t0039795 | 22 | 2 CGAGGTAGTAGGTTGTATGGTT     | miRNA | let-7c |
| t0040347 | 22 | 2 TGAGGTTGTAGATTGTATGGTT     | miRNA | let-7c |
| t0040500 | 21 | 2 TAAGGTAGTAGGTTGTATGGT      | miRNA | let-7c |
| t0040612 | 21 | 2 TGAGGTAGTAGGCTGTATGGT      | miRNA | let-7c |
| t0035340 | 25 | 2 TGGGGTAGTAGGTTGTATGGTTATC  | miRNA | let-7c |
| t0036354 | 23 | 2 TGAGGTAGTAGGTTGTGAGGTTT    | miRNA | let-7b |
| t0036381 | 19 | 2 TGTGGTAGTAGGTTGTGTG        | miRNA | let-7b |
| t0036585 | 21 | 2 TGAGGTAAGTAGATTGTGTGGT     | miRNA | let-7b |
| t0036693 | 24 | 2 TGAGGTAGTAGGTTATGTGGTTAA   | miRNA | let-7b |
| t0037380 | 24 | 2 TGGGGTAGTAGGTTGTGTGGTTAG   | miRNA | let-7b |
| t0037989 | 23 | 2 TGAGGTAGGAGGTTGTGTGGTTT    | miRNA | let-7b |
| t0038345 | 23 | 2 TGAGGTAGTAGGTTGTATGGCTC    | miRNA | let-7b |
| t0038858 | 24 | 2 TGAGGTAGTAGGTTGTGTGGGTAG   | miRNA | let-7b |
| t0038875 | 24 | 2 TGAGGTAGTAGGTTGTGTGGTCAT   | miRNA | let-7b |
| t0039009 | 19 | 2 TGAGCTAGTAGGTTGTGTG        | miRNA | let-7b |
| t0039362 | 22 | 2 TGAGGCAGTAGGCTGTGTGGTT     | miRNA | let-7b |
| t0039491 | 22 | 2 TGGGGTGGTAGGTTGTGTGGTT     | miRNA | let-7b |
| t0040136 | 21 | 2 TGAGGTAGTAGGTTGTTGGGT      | miRNA | let-7b |
| t0035200 | 22 | 2 TGAGGTAGTAGGTTGCGTAGTT     | miRNA | let-7b |
| t0035236 | 23 | 2 TGAGGTAGTAGGTCGTGTGGTTT    | miRNA | let-7b |
| t0035253 | 22 | 2 TGAGGAAGTCGTTGTGTGGTT      | miRNA | let-7b |
| t0035283 | 24 | 2 TGAGGTAGAAGGTTGTGTGGTTAA   | miRNA | let-7b |
| t0035286 | 23 | 2 TGAGGTAGTAGGTTGTGTGGATA    | miRNA | let-7b |
| t0035386 | 24 | 2 TGGGGTAGTAGGTTGTGTGGTTAA   | miRNA | let-7b |
| t0035447 | 22 | 2 TGAGGTAGTAGGCTGTGGGGTT     | miRNA | let-7b |
| t0035541 | 21 | 2 TAAGGTAGTAGGTTGTGTGGA      | miRNA | let-7b |
| t0035766 | 23 | 2 TGAGGTCGTAGGTTGTGTGGTTT    | miRNA | let-7b |
| t0035768 | 24 | 2 TGAGGTAGTAGGTTGTGGGGTTGA   | miRNA | let-7b |
| t0035827 | 21 | 2 TGGGTAGTAGGTTGTGTGGTT      | miRNA | let-7b |
| t0035854 | 25 | 2 TGAGGTAGTAGGTTGTGTGGTTTTTC | miRNA | let-7b |
| t0035861 | 23 | 2 TGAGGTAGTAGGTTGTATGGTTG    | miRNA | let-7b |
| t0035932 | 24 | 2 TGAGGTAGTAGGTTGGGTGGTTAA   | miRNA | let-7b |
| t0035953 | 23 | 2 TGAGGTAGTAGGTTGCGTGGTAT    | miRNA | let-7b |
| t0035995 | 20 | 2 TGAGGTAGTTGGTTGTGTGG       | miRNA | let-7b |
| t0036026 | 23 | 2 TGAGGTAATAGGTTGTGTGGTTA    | miRNA | let-7b |
| t0036190 | 24 | 2 TGAGGTAGTAGGTTGTGTGGTTGG   | miRNA | let-7b |
| t0036210 | 24 | 2 TGAGGTAGTAGGTTGTGTGGTTGC   | miRNA | let-7b |

|          |    |                              |       |        |
|----------|----|------------------------------|-------|--------|
| t0036227 | 24 | 2 TGAGGTAATAGGTTGTGTGGTTAA   | miRNA | let-7b |
| t0036241 | 22 | 2 TGAGGTAGTAGGTCGTGTGGTA     | miRNA | let-7b |
| t0036358 | 23 | 2 TGAGGTACTAGGTTGTGTGGTTT    | miRNA | let-7b |
| t0036372 | 22 | 2 TGACGTAGTAGGTTGTGTGGTA     | miRNA | let-7b |
| t0036377 | 24 | 2 TGAGGTAGGAGGTTGTGTGGTTAA   | miRNA | let-7b |
| t0036393 | 23 | 2 TGAGGTAGTAGGTTGGGTGGTTA    | miRNA | let-7b |
| t0036473 | 25 | 2 TGAGGTAGTAGGTTGTGGGGTTAGA  | miRNA | let-7b |
| t0036494 | 22 | 2 TGAGGACGTAGGTTGTGTGGTT     | miRNA | let-7b |
| t0036701 | 23 | 2 TGAGGTAGTAGGTTGGGTGGTTT    | miRNA | let-7b |
| t0036760 | 22 | 2 TGAGGTAGTAGCTTGTGGGGTT     | miRNA | let-7b |
| t0036887 | 22 | 2 TGAGGTAGTGGGTTGTGTGTTT     | miRNA | let-7b |
| t0036949 | 24 | 2 TGAGGTGGTAGGTTGTGTGGTTAT   | miRNA | let-7b |
| t0037001 | 23 | 2 TGAGGTAGTAGGTTGTGTGGGTG    | miRNA | let-7b |
| t0037136 | 20 | 2 TGAGGTAGTAGGTTGTTTGG       | miRNA | let-7b |
| t0037270 | 19 | 2 TGAGGTAATAGGTTGTGTG        | miRNA | let-7b |
| t0037320 | 23 | 2 TGAGGTAGTAGGTTGTGTGATTA    | miRNA | let-7b |
| t0037414 | 25 | 2 TGAGGAAGTAGGTTGTGTGGTTATC  | miRNA | let-7b |
| t0037449 | 18 | 2 TGTGGTAGTAGGTTGTGT         | miRNA | let-7b |
| t0037457 | 24 | 2 TGAGGTAGCAGGTTGTGTGGTTAT   | miRNA | let-7b |
| t0037508 | 25 | 2 CGAGGTAGTAGGTTGTGTGGTTATC  | miRNA | let-7b |
| t0037542 | 23 | 2 TGAGGTAGTAGGTTATGTGGTTT    | miRNA | let-7b |
| t0037552 | 24 | 2 TGAGGTAGTAGGTTGTGTGGGGAT   | miRNA | let-7b |
| t0037585 | 22 | 2 TGACGTAGTCGTTGTGTGGTT      | miRNA | let-7b |
| t0037655 | 22 | 2 TGAGGTAGTAGGATGTGGGGTT     | miRNA | let-7b |
| t0037684 | 22 | 2 TGAGGTAGTAGGTTGTGTGATA     | miRNA | let-7b |
| t0037690 | 24 | 2 TGAGGAAGTAGGTTGTGTGGTAGA   | miRNA | let-7b |
| t0037726 | 24 | 2 TGAGGTAGTAGGTTGTGTGGTCTC   | miRNA | let-7b |
| t0037754 | 21 | 2 TTAGGTAGTAGGTTGTGTAGT      | miRNA | let-7b |
| t0037795 | 19 | 2 TGAGGTCGTAGGTTGTGTG        | miRNA | let-7b |
| t0037809 | 23 | 2 TGGGGTAGTAGGTTGTGTGGTAA    | miRNA | let-7b |
| t0037859 | 24 | 2 TTAGGTAGTAGGTTGTGTGGTTAA   | miRNA | let-7b |
| t0037942 | 23 | 2 TGAGGTAGTCGTTGTGTGGTTA     | miRNA | let-7b |
| t0037943 | 23 | 2 TGCGGTAGTAGGTTGTGTGGTTA    | miRNA | let-7b |
| t0038030 | 23 | 2 TGAGGTAGTAGGTTGTCTGGTTA    | miRNA | let-7b |
| t0038033 | 20 | 2 TGAGGTAGTAGGTTTTGTGG       | miRNA | let-7b |
| t0038089 | 25 | 2 TGAGGTAGTAGGTTGTATGGTTATT  | miRNA | let-7b |
| t0038091 | 21 | 2 TGAGGTAGTAGGGTGTGCCGT      | miRNA | let-7b |
| t0038100 | 24 | 2 TGAGGTAGGAGGTTGTGTGGTTAG   | miRNA | let-7b |
| t0038105 | 22 | 2 TGAAGTAGTAGGTTGTGTGGTA     | miRNA | let-7b |
| t0038154 | 24 | 2 TGAGGTAGTAGGTTGTGTGGGATC   | miRNA | let-7b |
| t0038260 | 22 | 2 TGAGGTTGTAGGTTGTGTGGTA     | miRNA | let-7b |
| t0038272 | 23 | 2 TGAGGTAGTAGGTTGAGTGGTTA    | miRNA | let-7b |
| t0038306 | 24 | 2 TGAGGTAGTAGGGTGTGTGGTTAG   | miRNA | let-7b |
| t0038430 | 24 | 2 TAAGGTAGTAGGTTGTGTGGTTAA   | miRNA | let-7b |
| t0038488 | 23 | 2 TGAAGTAGTAGGTTGTGTGGTTA    | miRNA | let-7b |
| t0038552 | 24 | 2 TGAGGTAGTAGGTTGTGGGGTTAG   | miRNA | let-7b |
| t0038569 | 24 | 2 TGAGGTAGGAGGTTGTGTGGTTAT   | miRNA | let-7b |
| t0038582 | 24 | 2 TGCGGTAGTAGGTTGTGTGGTTAA   | miRNA | let-7b |
| t0038653 | 22 | 2 TGAGGTAGTAGTTTGTGGGGTT     | miRNA | let-7b |
| t0038686 | 21 | 2 TGAGGTAGTAGGCTGTGTGGA      | miRNA | let-7b |
| t0038749 | 26 | 2 TGAGGTAGTAGGTTGTGTGGTAAATC | miRNA | let-7b |
| t0038856 | 24 | 2 TGTGGTAGTAGGTTGTGTGGTTAA   | miRNA | let-7b |
| t0038862 | 25 | 2 TGAGGTAGTAGGTTGTATGGTTACC  | miRNA | let-7b |
| t0038863 | 21 | 2 TGAGGTAGTAGGTTGTGCAGT      | miRNA | let-7b |
| t0038912 | 24 | 2 CGAGGTAGTAGGTTGTGTGGTTAT   | miRNA | let-7b |
| t0039024 | 22 | 2 TGAGGTAGTAGGGTGTGTAGTT     | miRNA | let-7b |
| t0039174 | 23 | 2 TGAGGTAGTAGGTTGTGTGGAAT    | miRNA | let-7b |
| t0039177 | 22 | 2 TGAGGCAGTAGGTTGTGGGGTT     | miRNA | let-7b |

|          |    |                              |       |          |
|----------|----|------------------------------|-------|----------|
| t0039209 | 23 | 2 TGAGGAAGTAGGTTGTGTGGTAA    | miRNA | let-7b   |
| t0039255 | 23 | 2 TGAGGTAGTAGATTGTGTGGTAA    | miRNA | let-7b   |
| t0039298 | 19 | 2 TGAGGTAGAAGGTTGTGTG        | miRNA | let-7b   |
| t0039359 | 23 | 2 TGAGGTAGTAGGTTGGGTGGTTG    | miRNA | let-7b   |
| t0039411 | 22 | 2 TGAGGTAGGAGGTTGTGTAGTT     | miRNA | let-7b   |
| t0039480 | 23 | 2 TGAGCTAGTAGGTTGTGTGGTTA    | miRNA | let-7b   |
| t0039510 | 22 | 2 TGAGGTAGTAGGTTGTGTTGTA     | miRNA | let-7b   |
| t0039560 | 21 | 2 TGAGGAAGTAGGTTGTGTGTT      | miRNA | let-7b   |
| t0039569 | 21 | 2 TGAGGTAGTAGGTTGCGTAGT      | miRNA | let-7b   |
| t0039599 | 23 | 2 TGAGGTAGTAGGTTGTGCCGTAA    | miRNA | let-7b   |
| t0039660 | 21 | 2 TTAGGTAGTAGGTTGTGGGGT      | miRNA | let-7b   |
| t0039693 | 25 | 2 TGAGGTAGTAGGTTGTGTGGTTATA  | miRNA | let-7b   |
| t0039705 | 23 | 2 TGAGGTAGTAGGTTGTATGGTTC    | miRNA | let-7b   |
| t0039722 | 22 | 2 TGAGGTAGTCGTTGTGTGGTA      | miRNA | let-7b   |
| t0039785 | 22 | 2 TGAGGTAGTAGGGTGTGGGGTT     | miRNA | let-7b   |
| t0039790 | 26 | 2 TGAGGTAGTAGGTTGTGTGGTAGATC | miRNA | let-7b   |
| t0039804 | 24 | 2 TGAGGTTGTAGGTTGTGTGGTTAG   | miRNA | let-7b   |
| t0039832 | 22 | 2 TGTGGTAGTAGGTTGTGTGGTA     | miRNA | let-7b   |
| t0039881 | 20 | 2 TGTGGTAGTAGGTTGTGTGG       | miRNA | let-7b   |
| t0039884 | 21 | 2 CGAGGTAGTAGGTTGTGTGTT      | miRNA | let-7b   |
| t0039953 | 23 | 2 TGAGGTAGTGGGTTGTGTGGTAT    | miRNA | let-7b   |
| t0039970 | 25 | 2 TGAGGTAGTAGGTTGTATGGTTTTTC | miRNA | let-7b   |
| t0040001 | 22 | 2 TGAGGTAGTAGGTTGTGGAGTT     | miRNA | let-7b   |
| t0040019 | 22 | 2 TGAGGTAGTAGGTTGTATAGGA     | miRNA | let-7-5p |
| t0040042 | 24 | 2 TGAGGTAGTAGGGTGTATGGTATC   | miRNA | let-7-5p |
| t0040055 | 23 | 2 TGAGGTAGTAGGTTGTATGGTAA    | miRNA | let-7-5p |
| t0040079 | 22 | 2 TGAGGTAGCAGGTTGTATAGTA     | miRNA | let-7-5p |
| t0040094 | 22 | 2 TGAGGTAGTAGGTTGTATAGGC     | miRNA | let-7-5p |
| t0040146 | 22 | 2 TGAGGTAGTAGTTTGTATAGTA     | miRNA | let-7-5p |
| t0040160 | 20 | 2 TGAGGTAGGAGGGTGTATAG       | miRNA | let-7    |
| t0040259 | 21 | 2 TGAGGTAGTATGGTGTATAGT      | miRNA | let-7    |
| t0040260 | 19 | 2 TGAGGTAGGAGGTTGTATA        | miRNA | let-7    |
| t0040332 | 23 | 2 TGAGGTAGTGGGTTGTATAGTTG    | miRNA | let-7    |
| t0040493 | 19 | 2 TGAGGTAGTAGGATGTATA        | miRNA | let-7    |
| t0040503 | 19 | 2 TGTGGTAGTAGGTTGTATA        | miRNA | let-7    |
| t0040600 | 22 | 2 TGAGGTAGTAGGTTGTAGAGTT     | miRNA | let-7    |
| t0035280 | 19 | 2 TGAGGTAGTAGGTCGTATA        | miRNA | let-7    |
| t0035812 | 23 | 2 TGGGGTAGTAGGTTGTATAGTTG    | miRNA | let-7    |
| t0036831 | 23 | 2 TGAGGAAGTAGGTTGTATAGTTT    | miRNA | let-7    |
| t0038141 | 19 | 2 TGAGGTAGTGGGTGGTATA        | miRNA | let-7    |
| t0038452 | 22 | 2 TGACGTAGTAGGTTGTATAGTT     | miRNA | let-7    |
| t0040641 | 23 | 2 TGAGGAAGTAGGTTGTATAGTTA    | miRNA | let-7    |
| t0035602 | 18 | 2 TGAGGTAGTAGGGTGTAG         | miRNA | let-7    |
| t0035650 | 22 | 2 TGAGGTAGTAGGTAGTATAGTT     | miRNA | let-7    |
| t0035658 | 23 | 2 TAAGGTAGTAGGTTGTATAGTTT    | miRNA | let-7    |
| t0035700 | 20 | 2 TGAGGTAGTACGTTGTATAG       | miRNA | let-7    |
| t0035726 | 23 | 2 TGCGGTAGTAGGTTGTATAGTTT    | miRNA | let-7    |
| t0036017 | 23 | 2 CGAGGTAGTAGGTTGTATAGTTG    | miRNA | let-7    |
| t0036157 | 19 | 2 TGCGGTAGTAGGTTGTATA        | miRNA | let-7    |
| t0036164 | 23 | 2 TGAGGTAGCAGGTTGTATAGTTT    | miRNA | let-7    |
| t0036375 | 23 | 2 TGAGGTAGTAGGTTGTTTAGTTG    | miRNA | let-7    |
| t0036413 | 22 | 2 TGGGGCAGTAGGTTGTATAGTT     | miRNA | let-7    |
| t0037174 | 23 | 2 TGAGGTAATAGGTTGTATAGTTG    | miRNA | let-7    |
| t0037340 | 20 | 2 TGAGGTATTAGGTTGTATAG       | miRNA | let-7    |
| t0037370 | 23 | 2 TGAGGTAGTGGGTTGTATAGTTT    | miRNA | let-7    |
| t0037909 | 21 | 2 TGAGGTGGGAGGTTGTATAGT      | miRNA | let-7    |
| t0037932 | 24 | 1 AAAAGTTAGTGGTCCGAAGTTTTA   | miRNA | miR-9c   |
| t0038049 | 26 | 1 TCTTTGGTTATCCAGCTGTATGAATC | miRNA | miR-9a   |

|          |    |                              |       |            |
|----------|----|------------------------------|-------|------------|
| t0038164 | 26 | 1 TCTTTGGTTATCTAGCTATATGAATC | miRNA | miR-9a     |
| t0038287 | 22 | 1 CACCCGTAGAACCGAACCTTGAG    | miRNA | miR-99b    |
| t0038313 | 22 | 1 CACCAGTAGAACCGACCTTGCG     | miRNA | miR-99b    |
| t0038375 | 22 | 1 CACCCGTAGAACCGACCTTGAG     | miRNA | miR-99b    |
| t0038673 | 25 | 1 CACCCGTAGAACCGACCTCGCGATC  | miRNA | miR-99b    |
| t0038680 | 24 | 1 ACCCGTAGAACCGACCTTGCGATC   | miRNA | miR-99b    |
| t0039057 | 26 | 1 AACCCGTAGATCCGAACCTGTGAATC | miRNA | miR-99a    |
| t0039299 | 20 | 1 AACCCGCAGATCCGATCTTG       | miRNA | miR-99a    |
| t0040040 | 24 | 1 AACCCGTAGATACGATCTTGTATC   | miRNA | miR-99a    |
| t0040048 | 22 | 1 TGAAGTATGATGCTCGGCTT       | miRNA | miR-996    |
| t0040120 | 21 | 1 AACTGATAGATGCTCGGCAAT      | miRNA | miR-996    |
| t0044426 | 23 | 1 TGAAGTATAGATGCTCGGCTTT     | miRNA | miR-996    |
| t0064659 | 24 | 1 CTGAACTGATAGATGCTCGGCTTT   | miRNA | miR-996    |
| t0068392 | 22 | 1 TGAAGTATAGATGCTCGGCTT      | miRNA | miR-996    |
| t0046242 | 21 | 1 AAGCCTCGACAACCTTACTACT     | miRNA | miR-98*    |
| t0047986 | 22 | 1 CTATACGACTTACTACTTTTCT     | miRNA | miR-98*    |
| t0061933 | 21 | 1 TATACAACCTTACTACTTTACT     | miRNA | miR-98*    |
| t0089025 | 21 | 1 TATACAACCTTACTAATTTTCAT    | miRNA | miR-98*    |
| t0091962 | 19 | 1 CTATACCACTTACTACTTT        | miRNA | miR-98*    |
| t0057674 | 20 | 1 CTATAAAACCTTACTACTTTT      | miRNA | miR-98*    |
| t0079328 | 20 | 1 TGAGGTAATAAGTTGTATTG       | miRNA | miR-98     |
| t0091759 | 22 | 1 TGCGGTAGTAAGTTGTATTGTT     | miRNA | miR-98     |
| t0055920 | 20 | 1 TGAGGTAGTCAGTTGTATTG       | miRNA | miR-98     |
| t0072593 | 22 | 1 TGAGGTAGTAAGTTGTATAGGT     | miRNA | miR-98     |
| t0085277 | 23 | 1 TGAGGTAGTAGGTTGTATTGATC    | miRNA | miR-98     |
| t0090353 | 21 | 1 TGAGGGAGTAAGTTGTATTGT      | miRNA | miR-98     |
| t0093429 | 20 | 1 TGAGGAAGTAAGTTGTATTG       | miRNA | miR-98     |
| t0043533 | 21 | 1 TGAGGTAGTGAGTTGTATTGT      | miRNA | miR-98     |
| t0054593 | 22 | 1 TGAGGTAGTAAGTTGTGTGGAA     | miRNA | miR-98     |
| t0062959 | 21 | 1 TGAGGTAGTAGGTTGTATTGC      | miRNA | miR-98     |
| t0066294 | 22 | 1 TGAGGTAGGAAGTTGTATTGTT     | miRNA | miR-98     |
| t0067733 | 19 | 1 TGAGGTGGTAGGTTGTAGT        | miRNA | miR-965-5p |
| t0084995 | 20 | 1 GGTGGAAGGGTGTAGGCATG       | miRNA | miR-965-5p |
| t0058130 | 23 | 1 GGTGGAAGGTTGTAGGCATGTCT    | miRNA | miR-965-5p |
| t0063971 | 20 | 1 AAGTGAAGGTTGTAGGCAT        | miRNA | miR-965-5p |
| t0064986 | 24 | 1 TCCAGGGGGAAGGTTGTAGGCATG   | miRNA | miR-965-5p |
| t0066299 | 21 | 1 GGGGGAAGGTTGTAGGCATGT      | miRNA | miR-965-5p |
| t0066353 | 23 | 1 AGGTGGAAGGTTGTAGGCATGGA    | miRNA | miR-965-5p |
| t0067755 | 23 | 1 CAGGGGGAAGGTTGTAGGCATGT    | miRNA | miR-965-5p |
| t0076401 | 20 | 1 AGGTGGGAGGTTGTAGGCAT       | miRNA | miR-965-5p |
| t0079824 | 20 | 1 GTGGAAGGTTGTGGGCATGT       | miRNA | miR-965-5p |
| t0081681 | 22 | 1 CAGGGGGAAGGTTGTAGGCATG     | miRNA | miR-965-5p |
| t0082874 | 19 | 1 CAGGTGGAAGGGTGTAGGC        | miRNA | miR-965-5p |
| t0092713 | 22 | 1 AGGTGGAAGGGTGTAGGCATGT     | miRNA | miR-965-5p |
| t0043352 | 23 | 1 AGGGGGAAGGTTGTAGGCATGTA    | miRNA | miR-965-5p |
| t0046125 | 20 | 1 GTGGAAGGGTGTAGGCATGT       | miRNA | miR-965-5p |
| t0047750 | 20 | 1 AGGTGGAAGGGTGTAGGCAT       | miRNA | miR-965-5p |
| t0048835 | 21 | 1 CAATCATGTGCAGTGACAATA      | miRNA | miR-96*    |
| t0055862 | 21 | 1 TTTGGCAATAGCACATTTTTG      | miRNA | miR-96     |
| t0059454 | 22 | 1 TTCCCTGTTTTGGCCATGTGTG     | miRNA | miR-942    |
| t0062329 | 22 | 1 CACCCGGCTGTGAGCACATGTG     | miRNA | miR-941    |
| t0063209 | 21 | 1 CACCCGGCTGTGTGCACCTGT      | miRNA | miR-941    |
| t0064703 | 23 | 1 CACCCGGCTGTGCGCACATGTGT    | miRNA | miR-941    |
| t0067432 | 23 | 1 CACCCGGCTGTGGGCACATGTGA    | miRNA | miR-941    |
| t0069586 | 23 | 1 CACCCGGCTGTGTGCACATGGGA    | miRNA | miR-941    |
| t0076959 | 26 | 1 TCTATTCCGTAGTGCATTGCAGAATC | miRNA | miR-932-5p |
| t0082046 | 26 | 1 CCAATTCGCTAGTGCATTGCAGAATC | miRNA | miR-932-5p |
| t0082371 | 26 | 1 CAAAGTGCTGTTCTGTCGGTAGATC  | miRNA | miR-93     |

|          |    |                             |       |        |
|----------|----|-----------------------------|-------|--------|
| t0083971 | 23 | 1 CAAAGTGCTGTCGTGCAGGCAG    | miRNA | miR-93 |
| t0092494 | 24 | 1 CAAAGTGCTGTTTCATGCAGGTAGA | miRNA | miR-93 |
| t0048521 | 19 | 1 CAAAGCGCTGTTTCGTGCAG      | miRNA | miR-93 |
| t0080916 | 23 | 1 CAACGTGCTGTCGTGCAGGTAG    | miRNA | miR-93 |
| t0077083 | 20 | 1 CAAAGTGCTGTTTCGTGAAGG     | miRNA | miR-93 |
| t0043917 | 22 | 1 CAAAGTGCTGTTTCGTGCACGTA   | miRNA | miR-93 |
| t0068032 | 23 | 1 TAAAGTGCTGTTTCGTGCAGGTAG  | miRNA | miR-93 |
| t0070551 | 22 | 1 CAAAGTGCTGTTTCATGCAGGTA   | miRNA | miR-93 |
| t0073323 | 22 | 1 CAAAGTGCTGTCGGTGCAGGTA    | miRNA | miR-93 |
| t0079507 | 23 | 1 CAAAGTGTTGTTTCGTGCAGGTAG  | miRNA | miR-93 |
| t0068295 | 21 | 1 CAAAGTGCTATTCGTGCAGGT     | miRNA | miR-93 |
| t0073827 | 22 | 1 CAAAGTGATGTTTCGTGCAGGTA   | miRNA | miR-93 |
| t0041481 | 21 | 1 CAAAGTGCTGTTTCGTACAGGT    | miRNA | miR-93 |
| t0041530 | 23 | 1 CAAAGTGCTTTTCGTGCAGGGAG   | miRNA | miR-93 |
| t0041925 | 21 | 1 CAAAGTGCAGTTCGTGCAGGT     | miRNA | miR-93 |
| t0043211 | 20 | 1 CAAAGTGCCGTTTCGTGCAGG     | miRNA | miR-93 |
| t0043765 | 20 | 1 CAAAGTGCTGTTTCGTGGAGG     | miRNA | miR-93 |
| t0044311 | 22 | 1 CAAAGGGCTGTTTCGTGCAGTTA   | miRNA | miR-93 |
| t0044850 | 21 | 1 CAAAGTGCTGTTTGTGCAGGT     | miRNA | miR-93 |
| t0048530 | 23 | 1 CAAAGTGCTGTTTCCTGCAGGTAG  | miRNA | miR-93 |
| t0050427 | 22 | 1 CAAGGTGCTGTTTCGTGCAGGTA   | miRNA | miR-93 |
| t0050612 | 22 | 1 CAAAGTGCTGTTTCGGGCAGGGA   | miRNA | miR-93 |
| t0050630 | 22 | 1 CAAAGTGCTGTTTCGTGAAGGTA   | miRNA | miR-93 |
| t0051042 | 21 | 1 CAAAGTGCTGTTTCGAGCAGGT    | miRNA | miR-93 |
| t0051299 | 21 | 1 AAAGAGCTGTTTCGTGCAGGTA    | miRNA | miR-93 |
| t0052100 | 23 | 1 CAAAGTGCTGTTTCGTGGAGGTAG  | miRNA | miR-93 |
| t0052120 | 23 | 1 CAAAGTGCTGTTTCGCGCAGGTAG  | miRNA | miR-93 |
| t0053373 | 21 | 1 CAAAGTGATGTTTCGTGCAGGT    | miRNA | miR-93 |
| t0054190 | 19 | 1 CAAAGTGCTGTTTCGTGCCG      | miRNA | miR-93 |
| t0054260 | 23 | 1 CAAAGTGCTGTTTCGTGCAGGCAA  | miRNA | miR-93 |
| t0054548 | 22 | 1 CAGAGTGCTGTTTCGTGCAGGTA   | miRNA | miR-93 |
| t0056548 | 23 | 1 CAAAGTGCTGTTTCGGGCAGGTAT  | miRNA | miR-93 |
| t0058905 | 21 | 1 CACAGTGCTGTTTCGTGCAGGT    | miRNA | miR-93 |
| t0059241 | 21 | 1 CAAAGTGCTGTTTCGTGCAGGC    | miRNA | miR-93 |
| t0059986 | 23 | 1 CAAAGTGCTGTTTCGTACAGGTAT  | miRNA | miR-93 |
| t0061470 | 22 | 1 CAAAGTGCTGATTCGTGCAGGTA   | miRNA | miR-93 |
| t0061961 | 21 | 1 CAAAGTGCTGTTTCGTGCGGT     | miRNA | miR-93 |
| t0062023 | 23 | 1 CAAAGTGCTTTTCGTGCAGGAAG   | miRNA | miR-93 |
| t0062573 | 22 | 1 CAAAGTGCTGTTTCGTGCCGGT    | miRNA | miR-93 |
| t0062607 | 22 | 1 CAAAGTGCGGTTTCGTGCAGGTA   | miRNA | miR-93 |
| t0064634 | 23 | 1 CAAAGTGCTGTTAGTGCAGGTAT   | miRNA | miR-93 |
| t0065991 | 23 | 1 CAAAGTGGTTCGTGCAGGTAG     | miRNA | miR-93 |
| t0066226 | 21 | 1 CAAAGTGCTGTTTCGGGCAGGT    | miRNA | miR-93 |
| t0066313 | 22 | 1 CAAAGTGCTGTTTCATGCAGGTG   | miRNA | miR-93 |
| t0066370 | 23 | 1 CACAGTGCTGTTTCGTGCAGGTAG  | miRNA | miR-93 |
| t0066490 | 21 | 1 CAAAGTACTGTTTCGTGCAGGT    | miRNA | miR-93 |
| t0066672 | 23 | 1 CAAAGCGCTGTTTCGTGCAGGCAG  | miRNA | miR-93 |
| t0066757 | 23 | 1 CGAAGTGCTGTTTCGTGCAGGTAG  | miRNA | miR-93 |
| t0067565 | 21 | 1 CAAAGTGCTGTTTCGGGAAGGT    | miRNA | miR-93 |
| t0068489 | 21 | 1 CAAAGTGCTGCTTCGTGCAGGT    | miRNA | miR-93 |
| t0068642 | 24 | 1 CAAAGTGCTGTTTCGAGCAGGTAGA | miRNA | miR-93 |
| t0069471 | 22 | 1 CAAAGTGCTGTTTCGGGCAGGTC   | miRNA | miR-93 |
| t0069643 | 22 | 1 CAAAGTGCCGTTTCGTGCAGGTA   | miRNA | miR-93 |
| t0070529 | 20 | 1 CAAAGTGCTGTTTCGTGCCGG     | miRNA | miR-93 |
| t0074022 | 22 | 1 CAAAGTGCTGTTTCGTGCGGGTA   | miRNA | miR-93 |
| t0074027 | 22 | 1 CAAAGAGCTGTTTCGTGCAGGTA   | miRNA | miR-93 |
| t0074182 | 20 | 1 CAAAGTGCTGTTTCGGGCAGG     | miRNA | miR-93 |
| t0074599 | 23 | 1 CAAAGTCTGTTTCGTGCAGGTAG   | miRNA | miR-93 |



|          |    |                                  |       |            |
|----------|----|----------------------------------|-------|------------|
| t0075248 | 22 | 1 CAAAGTGCTGTCGTACAGGTA          | miRNA | miR-93     |
| t0075504 | 22 | 1 CCAAGTGCTGTCGTGCAGGTA          | miRNA | miR-93     |
| t0077865 | 22 | 1 TAAAGTGCTGTCGTGCAGGTA          | miRNA | miR-93     |
| t0078109 | 22 | 1 CTAAGTGCTGTCGTGCAGGTA          | miRNA | miR-93     |
| t0078943 | 24 | 1 TATTGACTTGTCCCGGCCTGTAG        | miRNA | miR-92d    |
| t0079650 | 20 | 1 ATTGCACCTGTCCCGGCCTG           | miRNA | miR-92c    |
| t0079890 | 19 | 1 ATTGCACCTGTACCGCCT             | miRNA | miR-92c    |
| t0080775 | 22 | 1 ATTGAACTTGTCCCGGCCTGTT         | miRNA | miR-92c    |
| t0083274 | 19 | 1 ATTGCACCTGTACCGCCT             | miRNA | miR-92c    |
| t0084377 | 19 | 1 ATTGCACCTGTTCAGGCCT            | miRNA | miR-92c    |
| t0084933 | 22 | 1 AATTGCATTTGTCCCGGCCTGT         | miRNA | miR-92c    |
| t0085357 | 21 | 1 GATTGCACCTGTCCCGGCCTG          | miRNA | miR-92c    |
| t0086908 | 22 | 1 TATTGCACCTGTCCCGGCCTGGA        | miRNA | miR-92b-3p |
| t0087163 | 22 | 1 TATTGCACCTGTCTCGGCCTGA         | miRNA | miR-92b-3p |
| t0088809 | 22 | 1 ATTGCACCTGTCCCGCCTGTA          | miRNA | miR-92b-3p |
| t0089811 | 22 | 1 TATTGCACCTGTCCCGGACTGA         | miRNA | miR-92b-3p |
| t0092877 | 22 | 1 TATTGCAATTGTCCCGGCCTGA         | miRNA | miR-92b-3p |
| t0069500 | 22 | 1 ATTGCAATTGTCCCGGCCTGTA         | miRNA | miR-92b-3p |
| t0043889 | 22 | 1 TATTGCACCTGTCCCTGCCTGA         | miRNA | miR-92b-3p |
| t0053376 | 23 | 1 TATTGCATTTGTCCCGGCCTGAA        | miRNA | miR-92b-3p |
| t0058766 | 22 | 1 ATTGCACCTGTCCCGGCCTGGA         | miRNA | miR-92b-3p |
| t0061357 | 24 | 1 TATTGCATTTGTCCCGGCCTGAAA       | miRNA | miR-92b-3p |
| t0061573 | 22 | 1 TATTGCACCTGTCCCGCCTTGG         | miRNA | miR-92b-3p |
| t0074440 | 23 | 1 TATTGCACCTGTCCAGGCCTGGA        | miRNA | miR-92b-3p |
| t0082914 | 22 | 1 TATTGCTCTTGTCCCGGCCTGA         | miRNA | miR-92b-3p |
| t0041948 | 22 | 1 ATTGCACCTGTCCCGGCCTGGA         | miRNA | miR-92b-3p |
| t0048322 | 22 | 1 TATTGCATTTGTCCCGGCCTGG         | miRNA | miR-92b-3p |
| t0050495 | 35 | 1 ATTGAACTTGTCCCGGCCTGTAATACTCTC | miRNA | miR-92b-3p |
| t0051829 | 22 | 1 TATTGCACCTGTCTTGGCCTGA         | miRNA | miR-92b-3p |
| t0056181 | 22 | 1 TATTGCACCTGTCCCGGCCTCGG        | miRNA | miR-92b-3p |
| t0058300 | 22 | 1 ATTGCACCTGTCCCAGCCTGTA         | miRNA | miR-92b-3p |
| t0062152 | 23 | 1 TATTGCACCTGTCTTGGCCTGGA        | miRNA | miR-92b-3p |
| t0063084 | 22 | 1 ATTGCACCTATCCCGGCCTGTA         | miRNA | miR-92b-3p |
| t0064409 | 20 | 1 AGGGCCGGGACGCGGTGCAA           | miRNA | miR-92b*   |
| t0068252 | 20 | 1 AGGGACGGGACGCGGTGCCG           | miRNA | miR-92b*   |
| t0071948 | 20 | 1 AGGGACGGGACGAGGTGCAG           | miRNA | miR-92b*   |
| t0073032 | 20 | 1 AGGGACGGGCCGCGGTGCAA           | miRNA | miR-92b*   |
| t0073143 | 22 | 1 AGGGATGGGACGCGGTGCAGTA         | miRNA | miR-92b*   |
| t0074062 | 21 | 1 AGGGACGGGACGCGGTGAAGT          | miRNA | miR-92b*   |
| t0081699 | 20 | 1 AGGGACGGGACGCGGGCAG            | miRNA | miR-92b*   |
| t0081806 | 21 | 1 AGGGACGGTACGCGGTGCAGT          | miRNA | miR-92b*   |
| t0082345 | 22 | 1 AGGGACGGGACGCAGTGCAGTG         | miRNA | miR-92b*   |
| t0085265 | 22 | 1 AGGGACGGGACGCGGTGCAGCG         | miRNA | miR-92b*   |
| t0090553 | 21 | 1 CGGGACGGGACGCGGTGCAGT          | miRNA | miR-92b*   |
| t0092230 | 22 | 1 AGGGACGGGACGCGGTGCACTG         | miRNA | miR-92b*   |
| t0092475 | 23 | 1 AGGGACGGGACGCGGGCAGTGT         | miRNA | miR-92b*   |
| t0040720 | 21 | 1 AGGGACAGGACGCGGTGCAGT          | miRNA | miR-92b*   |
| t0041055 | 21 | 1 AGGGCCGGGACGCGGTGCAGT          | miRNA | miR-92b*   |
| t0042019 | 20 | 1 AGGGACGGGAGGCGGTGCAA           | miRNA | miR-92b*   |
| t0047447 | 21 | 1 AGGGACGGGACGCGGGCAGT           | miRNA | miR-92b*   |
| t0056613 | 23 | 1 AGGGACGGGACACGGTGCAGTGA        | miRNA | miR-92b*   |
| t0057107 | 21 | 1 AGGGACGGGACGCTGTGCAGT          | miRNA | miR-92b*   |
| t0058360 | 23 | 1 AGGGACGGGACGAGGTGAAGTGA        | miRNA | miR-92b*   |
| t0058651 | 21 | 1 AGGGACGGGACGCGGTGCCGT          | miRNA | miR-92b*   |
| t0058821 | 21 | 1 GGGACGGGACGCGGTGCAGGA          | miRNA | miR-92b*   |
| t0061062 | 21 | 1 AGGGAAGGGACGCGGTGCAGT          | miRNA | miR-92b*   |
| t0061269 | 21 | 1 AGGGACGGGACGAGGTGCAGT          | miRNA | miR-92b*   |
| t0061365 | 21 | 1 AGGGACGGGACGCGGTGCCGT          | miRNA | miR-92b*   |

|          |    |                            |       |            |
|----------|----|----------------------------|-------|------------|
| t0063646 | 21 | 1 AGGGACGGGACGCAGTGCAGT    | miRNA | miR-92b*   |
| t0065026 | 20 | 1 AGGGACGGGAAGCGGAGCAG     | miRNA | miR-92b*   |
| t0066458 | 20 | 1 AGGGACGGGAAGCGGTGCAG     | miRNA | miR-92b*   |
| t0067390 | 19 | 1 AGGGACGGGACGCGGTGTA      | miRNA | miR-92b*   |
| t0071401 | 22 | 1 AGGGACGGGACGCGGTGCTGTG   | miRNA | miR-92b*   |
| t0072300 | 20 | 1 AGGGACGGGGCGCGGTGCAG     | miRNA | miR-92b*   |
| t0073737 | 20 | 1 AGGGGCGGGACGCGGTGCAG     | miRNA | miR-92b*   |
| t0074141 | 20 | 1 AGGGACGGGACGCGATGCAG     | miRNA | miR-92b*   |
| t0074170 | 23 | 1 AGGGACGGGGCGCGGTGCAGTAG  | miRNA | miR-92b*   |
| t0074707 | 22 | 1 AGGGACGGGTGCGCGGTGCAGTG  | miRNA | miR-92b*   |
| t0074849 | 20 | 1 AGGGACGGGCCGCGGTGCCG     | miRNA | miR-92b*   |
| t0076198 | 22 | 1 AGGGACGGGACGCGGTGCAGTC   | miRNA | miR-92b*   |
| t0077433 | 21 | 1 AGGGACGGGACGCGATGCAGT    | miRNA | miR-92b*   |
| t0078627 | 21 | 1 TATTGCACTTGTCCCGGACTT    | miRNA | miR-92b    |
| t0079695 | 22 | 1 TATTGCACTTGTCCAGCCTTA    | miRNA | miR-92b    |
| t0080578 | 22 | 1 TATTGCACTTGTCTCGGCCTTT   | miRNA | miR-92b    |
| t0081264 | 23 | 1 TATTGCACTTGTCCCGGCCTTTT  | miRNA | miR-92b    |
| t0081611 | 21 | 1 TATTGCACTTGTCCCTGCCTT    | miRNA | miR-92b    |
| t0082889 | 21 | 1 TGTTGCACTTGTCCCGGCCTT    | miRNA | miR-92b    |
| t0083069 | 21 | 1 TATTGCACTTGTACCGGCCTT    | miRNA | miR-92b    |
| t0083630 | 22 | 1 TATTGCACTTGGCCCGGCATTT   | miRNA | miR-92b    |
| t0083923 | 21 | 1 TATTGCCCTTGTCTCGGCCTT    | miRNA | miR-92b    |
| t0084573 | 22 | 1 TATTGCACTTGTCCCGGCTGTC   | miRNA | miR-92b    |
| t0085295 | 21 | 1 ATTGCACTTGTCCCGGCTTTT    | miRNA | miR-92b    |
| t0085401 | 21 | 1 CATTGCACTTGTCCCGGCCAA    | miRNA | miR-92a-3p |
| t0090438 | 22 | 1 CATTGCACTTGTACGGCCTGT    | miRNA | miR-92a-3p |
| t0045001 | 21 | 1 CATTGCACTTGTCCCGGCCTG    | miRNA | miR-92a-3p |
| t0045114 | 20 | 1 AGGTTGGGATCGGTTGCGAT     | miRNA | miR-92a-1* |
| t0047577 | 23 | 1 AGGTTGGGATCGGTTGCAATTCT  | miRNA | miR-92a-1* |
| t0050135 | 23 | 1 AGGTTGGGATCGGTTGCCATGCT  | miRNA | miR-92a-1* |
| t0055451 | 21 | 1 TATTGCACTTGTCCCTGCCTG    | miRNA | miR-92a    |
| t0063352 | 21 | 1 TATTGCACTTGTCTCAGCCTG    | miRNA | miR-92a    |
| t0074771 | 23 | 1 TATTACACTTGTCCCGCCTGTT   | miRNA | miR-92a    |
| t0074823 | 22 | 1 TATTGCCCTTGTCCCGCCTAT    | miRNA | miR-92a    |
| t0081234 | 20 | 1 TATTGCACCTGTCCCGGCCT     | miRNA | miR-92a    |
| t0085563 | 22 | 1 TATTGCATTTGTCCCGGGCTGT   | miRNA | miR-92a    |
| t0089776 | 21 | 1 TATTGCTCTTGTCCCGGCCTG    | miRNA | miR-92a    |
| t0047556 | 21 | 1 TATTGCACTTGTCCCGGCCAC    | miRNA | miR-92a    |
| t0077230 | 20 | 1 TATTGGACTTGTCCCGGCCT     | miRNA | miR-92a    |
| t0078679 | 20 | 1 TATTGCACTTGTCTGGCCT      | miRNA | miR-92a    |
| t0047356 | 23 | 1 TATTGCACTTGTCCCGGACTGTA  | miRNA | miR-92a    |
| t0070050 | 23 | 1 TCTTGCACTTGTCCCGGACTGTA  | miRNA | miR-92a    |
| t0076074 | 22 | 1 TATTGCACTTGTCCCTGCCTGT   | miRNA | miR-92a    |
| t0040727 | 20 | 1 TATTACACTTGTCCCGGCAT     | miRNA | miR-92a    |
| t0041447 | 24 | 1 TATTGCACTTGTCCCGTCCTGTAG | miRNA | miR-92a    |
| t0042477 | 23 | 1 TATTGCACTTGTCCCGGCATGTA  | miRNA | miR-92a    |
| t0043232 | 20 | 1 TATTGCACTTGTCCCGACCT     | miRNA | miR-92a    |
| t0043275 | 22 | 1 TATTGCAATTGTCCCGGCCTAT   | miRNA | miR-92a    |
| t0044282 | 23 | 1 TATTGCACTTGTACCGGCCTGTA  | miRNA | miR-92a    |
| t0044988 | 19 | 1 TATTGCACTTGTCCCGGCC      | miRNA | miR-92a    |
| t0045391 | 23 | 1 TATTGCACTTGTCCCGGCATGTT  | miRNA | miR-92a    |
| t0045928 | 20 | 1 TATTGCACTTGTCCCGGACT     | miRNA | miR-92a    |
| t0045960 | 21 | 1 TATTGCACGTGTCCCGGCCTG    | miRNA | miR-92a    |
| t0046123 | 22 | 1 TATTGCAGTTGTCCCGGCCTGT   | miRNA | miR-92a    |
| t0046140 | 23 | 1 TATTGCACCTGTCCCGGCCTGTT  | miRNA | miR-92a    |
| t0046324 | 21 | 1 TATTGCACTTGTACCGGCCTA    | miRNA | miR-92a    |
| t0046421 | 21 | 1 TATTGCACCTGTCCCGGCCTG    | miRNA | miR-92a    |
| t0046827 | 19 | 1 TATTGCACTGGTCCCGGCC      | miRNA | miR-92a    |

|          |    |                           |       |         |
|----------|----|---------------------------|-------|---------|
| t0046930 | 22 | 1 TATTGCACTTGTGCCGGCCTGT  | miRNA | miR-92a |
| t0049330 | 21 | 1 TATTTCACTTGTCCCGGCCTG   | miRNA | miR-92a |
| t0050060 | 23 | 1 TATTGCATTTGTCCCGGCCTGTT | miRNA | miR-92a |
| t0050333 | 22 | 1 TATTGCGCTTGTCTGGCCTGT   | miRNA | miR-92a |
| t0051091 | 20 | 1 TATTGCACTTGACCCGGCCT    | miRNA | miR-92a |
| t0052104 | 21 | 1 TATTGCACTTGTCCAGCCTG    | miRNA | miR-92a |
| t0052381 | 21 | 1 TATTGCACATGTCCCGGCCTG   | miRNA | miR-92a |
| t0052911 | 21 | 1 TATTGCGCTTGTCCCGGCCTG   | miRNA | miR-92a |
| t0053346 | 20 | 1 TATTGCACTTGTCTCGGCCT    | miRNA | miR-92a |
| t0053616 | 21 | 1 TATAGCACTTGTCCCGGCCTG   | miRNA | miR-92a |
| t0055261 | 19 | 1 TATTGCACTTGTACCGGCC     | miRNA | miR-92a |
| t0055381 | 19 | 1 TATTGCAATTGTCCCGGCC     | miRNA | miR-92a |
| t0055958 | 19 | 1 TATTGCACTTGTACAGGCC     | miRNA | miR-92a |
| t0057955 | 23 | 1 TATTGCACTTGTACCGGCCTGTT | miRNA | miR-92a |
| t0058532 | 20 | 1 TATTACACTTGTCCCGGCCT    | miRNA | miR-92a |
| t0058595 | 20 | 1 TATTGCACTTGTCCCGGACA    | miRNA | miR-92a |
| t0060195 | 22 | 1 TCTTGCCTTGTCCCGGCCTGT   | miRNA | miR-92a |
| t0060766 | 23 | 1 TATTGCACTTGTCCCGACCTGTA | miRNA | miR-92a |
| t0061361 | 19 | 1 TATTACACTTGTCCCGGCC     | miRNA | miR-92a |
| t0062277 | 20 | 1 TGTTGCACTTGTCCCGGCCT    | miRNA | miR-92a |
| t0063569 | 21 | 1 TATTGCATTTGTCCCGGGCTG   | miRNA | miR-92a |
| t0063868 | 20 | 1 TATTGCACTTGGCCCGGCCT    | miRNA | miR-92a |
| t0064032 | 22 | 1 TATTGCATTTGTCCCGGACTGT  | miRNA | miR-92a |
| t0064333 | 22 | 1 TATTGCACTTGTCCCGGGGTGT  | miRNA | miR-92a |
| t0066478 | 23 | 1 TATTGAACTTGTCCCGGCCTGTA | miRNA | miR-92a |
| t0067352 | 21 | 1 TATTGCACTTGTCCCGACCTA   | miRNA | miR-92a |
| t0068889 | 19 | 1 TATTGCCCTTGTCCCGGCC     | miRNA | miR-92a |
| t0068896 | 22 | 1 TATTGCACTTGTCTCGGCATGT  | miRNA | miR-92a |
| t0069323 | 21 | 1 TATTGCACTTGTTCGGCCTA    | miRNA | miR-92a |
| t0069483 | 20 | 1 TATTGCACTTGTCCAGGACT    | miRNA | miR-92a |
| t0070110 | 23 | 1 TATTGCCCTTGTCCCGGCCTGTA | miRNA | miR-92a |
| t0070799 | 23 | 1 TATTGCATTTGTCCAGGCCTGTA | miRNA | miR-92a |
| t0072541 | 20 | 1 TATTGCACTTGTCCCGGCTT    | miRNA | miR-92a |
| t0074645 | 21 | 1 TATCGCACTTGTCCCGGCCTG   | miRNA | miR-92a |
| t0074660 | 19 | 1 TATTGCACTTCTCCCGGCC     | miRNA | miR-92a |
| t0075334 | 23 | 1 TATTGCACTTGTCCCGGCCCGTA | miRNA | miR-92a |
| t0076627 | 20 | 1 TATTGCACTTGTCCAGGCCT    | miRNA | miR-92a |
| t0076798 | 22 | 1 ATATTGCACTTGTCCCGGCTTG  | miRNA | miR-92a |
| t0077493 | 23 | 1 TATTGCACTTGTCCCGGGCTGTA | miRNA | miR-92a |
| t0079272 | 23 | 1 TATCGCACTTGTCCCGGCCTGTA | miRNA | miR-92a |
| t0079299 | 22 | 1 TATTGCACTTGTCCCGGCCCGT  | miRNA | miR-92a |
| t0079682 | 19 | 1 TATTGCACTTGTCCCGGAC     | miRNA | miR-92a |
| t0080100 | 22 | 1 TATTGCACTTGTCCCGCCCTGT  | miRNA | miR-92a |
| t0080429 | 22 | 1 TATTGCACTTGTACAGGCCTGT  | miRNA | miR-92a |
| t0080862 | 20 | 1 TATAGCACTTGTCCCGGCCT    | miRNA | miR-92a |
| t0080930 | 20 | 1 TACTGCACTTGTCCCGGCCT    | miRNA | miR-92a |
| t0081863 | 23 | 1 TATTGGACTTGTCCCGGCCTGTA | miRNA | miR-92a |
| t0083073 | 22 | 1 TACTGCACTTGTCCCGGCCTGT  | miRNA | miR-92a |
| t0084644 | 21 | 1 TATTGCACTTGTACCCGGCCTG  | miRNA | miR-92a |
| t0084777 | 22 | 1 TATTGCATTTGTCTCGGCCTGT  | miRNA | miR-92a |
| t0085105 | 21 | 1 TATTGCACTTTTCCCGGCCTG   | miRNA | miR-92a |
| t0085227 | 22 | 1 ATATTGCACTTGTCCAGGCCTG  | miRNA | miR-92a |
| t0085512 | 21 | 1 TATTGCACTTGTCCAGGCATG   | miRNA | miR-92a |
| t0085700 | 22 | 1 GGTGGGAGGCTGTGAAGCGGTG  | miRNA | miR-920 |
| t0086086 | 19 | 1 TATTGCACTCGTCACGGCC     | miRNA | miR-92  |
| t0086808 | 22 | 1 TATTGCACTCGTCCCGGCAAAA  | miRNA | miR-92  |
| t0087140 | 21 | 1 TATTGCACTCGTCCCGGCATT   | miRNA | miR-92  |
| t0087230 | 22 | 1 TATTGAACTCGTCCCGGCCTCT  | miRNA | miR-92  |

|          |    |                           |       |            |
|----------|----|---------------------------|-------|------------|
| t0087253 | 21 | 1 TATTGAACTCGTCCCGGCCAT   | miRNA | miR-92     |
| t0087534 | 21 | 1 TATTCCACTCGTCCCGGCCAA   | miRNA | miR-92     |
| t0087749 | 21 | 1 TATTGCACTCGTCCCGGCATC   | miRNA | miR-92     |
| t0088112 | 21 | 1 TATTGCAATCGTCCCGGCCTT   | miRNA | miR-92     |
| t0088907 | 22 | 1 TACTGCACTCGTCCCGGCCTAA  | miRNA | miR-92     |
| t0090018 | 22 | 1 TATTGCACTCGTACCGGCCTCT  | miRNA | miR-92     |
| t0090746 | 22 | 1 TATTGCACTCGTTCCGGCCATT  | miRNA | miR-92     |
| t0092217 | 21 | 1 TATTGCTCTCGTCCCGGCCTA   | miRNA | miR-92     |
| t0051331 | 21 | 1 TATTGGACTCGTCCCGGCCTA   | miRNA | miR-92     |
| t0040655 | 22 | 1 TATTGCACTCGCCCCGGCCTAA  | miRNA | miR-92     |
| t0044447 | 23 | 1 TATTGCACTCGTCACGGCCTCCA | miRNA | miR-92     |
| t0044849 | 22 | 1 TATTGCACTCGTCCCGGCAATA  | miRNA | miR-92     |
| t0045272 | 20 | 1 TATTGCACTCGTCTGGCCA     | miRNA | miR-92     |
| t0045739 | 22 | 1 TATTGCACTCGTCACGGCCTTA  | miRNA | miR-92     |
| t0046880 | 23 | 1 CTATTGCACTTGTCCCGGCCTAA | miRNA | miR-92     |
| t0047514 | 20 | 1 AATTGCACTCGTCCCGGCCT    | miRNA | miR-92     |
| t0048466 | 21 | 1 TATTGCACTCGTCCCGGCCTC   | miRNA | miR-92     |
| t0049982 | 19 | 1 TATTGTA CT CGTCCCGGCC   | miRNA | miR-92     |
| t0050653 | 19 | 1 TATTGCACTCGTCCAGGCC     | miRNA | miR-92     |
| t0051214 | 22 | 1 TATTGCACTAGTCCCGGCCATT  | miRNA | miR-92     |
| t0054048 | 22 | 1 TATTGAACTCGTCCCGGCCTAA  | miRNA | miR-92     |
| t0055218 | 22 | 1 TATTGCACTCGTCCAGGCCTCT  | miRNA | miR-92     |
| t0055253 | 20 | 1 TATTGCACTCGTCCCGGCCG    | miRNA | miR-92     |
| t0055910 | 22 | 1 TATTGCACTCGTCCCGCCCTCA  | miRNA | miR-92     |
| t0056363 | 22 | 1 TATTGCACTCGTCCGGGCCTTA  | miRNA | miR-92     |
| t0057643 | 22 | 1 TATTGCACTTGTCCCGGCCTAC  | miRNA | miR-92     |
| t0057840 | 19 | 1 TTGCACTCGTCCCGGCATC     | miRNA | miR-92     |
| t0058346 | 20 | 1 TATTGCACTCGTCCCGGTCA    | miRNA | miR-92     |
| t0058567 | 22 | 1 TATTGCACTCGTCACGGACTCT  | miRNA | miR-92     |
| t0060617 | 23 | 1 TATTGCACTCGTCCCGGCAAAGA | miRNA | miR-92     |
| t0062093 | 23 | 1 TATTGGACTCGTCCCGGCCTATT | miRNA | miR-92     |
| t0062485 | 22 | 1 TATTGCACCCGTCCCGGCCTTA  | miRNA | miR-92     |
| t0063358 | 23 | 1 TATTGCACTTGTCCCGGCCTAAG | miRNA | miR-92     |
| t0064138 | 22 | 1 TATTGCACTCGTCCCGGGCTAT  | miRNA | miR-92     |
| t0065267 | 21 | 1 TATTGCACTCGTCCCGGCCTG   | miRNA | miR-92     |
| t0066308 | 22 | 1 TATTGCACTCGTCCCGGCCTAC  | miRNA | miR-92     |
| t0067397 | 20 | 1 TATTGCACTCGTCACGGCCA    | miRNA | miR-92     |
| t0067997 | 21 | 1 TATCGCACTCGTCCCGGCCTA   | miRNA | miR-92     |
| t0068023 | 20 | 1 TATTGCACTCGTCCCGGACA    | miRNA | miR-92     |
| t0068349 | 19 | 1 TTGCACTCGTACCGGCCTC     | miRNA | miR-92     |
| t0069814 | 22 | 1 TATTGCACTCGTCCCGACCTAA  | miRNA | miR-92     |
| t0070842 | 22 | 1 TATTGCACTCGTCCCAGCCTCT  | miRNA | miR-92     |
| t0073264 | 21 | 1 TATTGCGCTCGTCCCGGCCTA   | miRNA | miR-92     |
| t0074136 | 22 | 1 TATTGCAATCGTCCCGGCCAAT  | miRNA | miR-92     |
| t0074172 | 22 | 1 TATTGCACTTGTCCCGGCCACA  | miRNA | miR-92     |
| t0075039 | 20 | 1 TATTGCACTCGTACCGGCCT    | miRNA | miR-92     |
| t0075514 | 21 | 1 TATTGCACTCGTCACGGCCTA   | miRNA | miR-92     |
| t0076237 | 22 | 1 TATTGCAATCGTCCCGGCCTCT  | miRNA | miR-92     |
| t0076324 | 22 | 1 TATTGCACTCGTCCCGGCCACA  | miRNA | miR-92     |
| t0076661 | 18 | 1 GGGCAGGGGGTGTAGTGG      | miRNA | miR-885-3p |
| t0078430 | 20 | 1 GGGCAGGGGGTGTAGTGGTA    | miRNA | miR-885-3p |
| t0079573 | 18 | 1 GGGCACGTGGTGTAGTGG      | miRNA | miR-885    |
| t0080284 | 18 | 1 CCGGTGGTGTAGCGGTAT      | miRNA | miR-885    |
| t0080710 | 20 | 1 GGGCAGGTGGTGCAGTGGTA    | miRNA | miR-885    |
| t0080811 | 23 | 1 GTAGAGGAGATGGCGCAGGGGCC | miRNA | miR-877    |
| t0083357 | 22 | 1 TAGAGGAGATGGAGCAGGGGAA  | miRNA | miR-877    |
| t0083926 | 20 | 1 AGAGGAAATGGCGCAGGGGA    | miRNA | miR-877    |
| t0086987 | 22 | 1 GTAGCGGCATGGCGCAGGGGA   | miRNA | miR-877    |

|          |    |                               |       |            |
|----------|----|-------------------------------|-------|------------|
| t0088176 | 22 | 1 GTAGAGGAGATGGCGCCGGGGA      | miRNA | miR-877    |
| t0089371 | 20 | 1 GTAGAGGCGATGGCGCAGGG        | miRNA | miR-877    |
| t0089467 | 20 | 1 GTAGAGGAGATGGCGAAGGA        | miRNA | miR-877    |
| t0092071 | 23 | 1 TGGAGGAGATGGCGCAGGGGACT     | miRNA | miR-877    |
| t0056867 | 22 | 1 GTAGAGGAGTTGGCGCAGGGGA      | miRNA | miR-877    |
| t0059665 | 23 | 1 TAGACGAGATGGCGCAGGGGACT     | miRNA | miR-877    |
| t0056480 | 22 | 1 AGAGGAGATGGCGCAGTGGACT      | miRNA | miR-877    |
| t0069350 | 20 | 1 GTAGAGGGGATGGCGCAGGA        | miRNA | miR-877    |
| t0092644 | 21 | 1 TAGAGGAGATGGCGCAGGTAA       | miRNA | miR-877    |
| t0041972 | 22 | 1 TAGAGGAGATGGCACAGGGGAA      | miRNA | miR-877    |
| t0042133 | 22 | 1 GTAGAGGAGCTGGCGCAGGGGA      | miRNA | miR-877    |
| t0043892 | 22 | 1 TAGAGGAGATAGCGCAGGGGAA      | miRNA | miR-877    |
| t0047868 | 22 | 1 TAGAGGAAATGGCGCAGGGGAC      | miRNA | miR-877    |
| t0048475 | 21 | 1 AGAGGAGATGGAGCAGGGGAA       | miRNA | miR-877    |
| t0057349 | 26 | 1 GTAGAGGAGATGGCGCAGGGGAATTT  | miRNA | miR-877    |
| t0059565 | 21 | 1 GTAGAGGAGATGGCGCAAGGG       | miRNA | miR-877    |
| t0059894 | 24 | 1 GTAGAGGAGATGGAGCAGGGGACT    | miRNA | miR-877    |
| t0060582 | 22 | 1 AGAGGAGATGGCGCAGGGGGCT      | miRNA | miR-877    |
| t0061372 | 22 | 1 TAGAGGAGATGGCGCAGGGGTA      | miRNA | miR-877    |
| t0069123 | 22 | 1 AGGGGAGATGGCGCAGGGGACA      | miRNA | miR-877    |
| t0069252 | 22 | 1 TAGAGGAGATGGGGCAGGGGAA      | miRNA | miR-877    |
| t0070159 | 22 | 1 GTGAGCAAAGTTTTCAGTGTGT      | miRNA | miR-87     |
| t0076625 | 25 | 1 TGGAAAGACTAGTGATTTTGTTCATC  | miRNA | miR-7b     |
| t0077304 | 24 | 1 GTGGGCCTGACGTGGAGCTGGCTC    | miRNA | miR-770-3p |
| t0080185 | 20 | 1 TGGAGAGAAAGGAAGTTTGA        | miRNA | miR-765    |
| t0081004 | 21 | 1 TGGAGAGAAAGGAAGTGTTTG       | miRNA | miR-765    |
| t0082138 | 22 | 1 TGGAGAGAAAGGAAGTTAATGA      | miRNA | miR-765    |
| t0082164 | 22 | 1 TGGAGAGAAAGGAAGTTCTTGC      | miRNA | miR-765    |
| t0082458 | 22 | 1 TGGAGAGAAAGGAAGTTTATGA      | miRNA | miR-765    |
| t0083872 | 18 | 1 TGGAGAGAAAGGAAGTTT          | miRNA | miR-765    |
| t0087548 | 19 | 1 TGGAGAGAAAGGGAGTTGA         | miRNA | miR-765    |
| t0088971 | 22 | 1 TGGAGAGAAAGGCAGTTAATGG      | miRNA | miR-765    |
| t0092899 | 22 | 1 TGAAGAGAAAGGCAGTTTATGT      | miRNA | miR-765    |
| t0093110 | 21 | 1 TGGAGAGAAAGGCAGTTTATG       | miRNA | miR-765    |
| t0051536 | 19 | 1 TGGAGAGAAAGGCAGTTTA         | miRNA | miR-765    |
| t0088078 | 21 | 1 TGGAGAGAAAGGAAGTTTATG       | miRNA | miR-765    |
| t0087233 | 21 | 1 TGGAGAGAAAGGAAGTTTCTG       | miRNA | miR-765    |
| t0042469 | 23 | 1 TGGAAAGACTGGTGATATGTTGTA    | miRNA | miR-7-5p   |
| t0053737 | 21 | 1 TGGAAAGACTGGGGATATGTTT      | miRNA | miR-7-5p   |
| t0055842 | 23 | 1 AAGTTAGATTGTGATTGGCATT      | miRNA | miR-753c   |
| t0076371 | 21 | 1 TTTGTATTGTGACTGGCATGT       | miRNA | miR-753c   |
| t0080077 | 26 | 1 AAGTTGGATTGTGAGTGGCACATTTT  | miRNA | miR-753c   |
| t0081623 | 24 | 1 AATTTGGATTATGACTGGCATT      | miRNA | miR-753c   |
| t0082794 | 20 | 1 AAGTTAGATTGTGATTGGCA        | miRNA | miR-753c   |
| t0083852 | 20 | 1 AAGTTGGATTGTGACTGGCA        | miRNA | miR-753c   |
| t0088593 | 26 | 1 AAGTTGGATTGTGACTGGCATATTCT  | miRNA | miR-753c   |
| t0088841 | 27 | 1 AAGTTGGATTGTGACTGGCAAGCGGAA | miRNA | miR-753c   |
| t0089454 | 25 | 1 AAGTTGGATTGTGACTGGTATTTTT   | miRNA | miR-753c   |
| t0090159 | 24 | 1 AAGTTGGATTGTGACTGGCATTAT    | miRNA | miR-753c   |
| t0093060 | 26 | 1 AAGTTAGATTGTGACTGGCACATTTT  | miRNA | miR-753c   |
| t0047185 | 23 | 1 TTTGTATTGTGACTGGCATGTTT     | miRNA | miR-753c   |
| t0057673 | 24 | 1 TTTGTATTGTGACTGGCAAGTTT     | miRNA | miR-753c   |
| t0042943 | 22 | 1 ATTTGTATTGTGACTGGCATT       | miRNA | miR-753c   |
| t0043728 | 26 | 1 AAGTTGGATTGTGACTGGCATATTTT  | miRNA | miR-753c   |
| t0044464 | 24 | 1 AATTTGGATTGTGACTGGCATT      | miRNA | miR-753c   |
| t0046956 | 25 | 1 AAGTTGGATTGTGACTGGCAATTTT   | miRNA | miR-753c   |
| t0047835 | 22 | 1 AAGTTGGATTGTGACTAGCGGA      | miRNA | miR-753c   |
| t0054938 | 24 | 1 TGCAGGGCTAGGGCTAACAGCATC    | miRNA | miR-744    |

|          |    |                                |       |            |
|----------|----|--------------------------------|-------|------------|
| t0056459 | 22 | 1 TGAGGGGCTAGGGCTAACAGCA       | miRNA | miR-744    |
| t0057160 | 24 | 1 TGCGGGGCTAGGGCTAAAAGCATC     | miRNA | miR-744    |
| t0062958 | 22 | 1 TGTGGGGCTAGGGCTAACAGCA       | miRNA | miR-744    |
| t0069571 | 20 | 1 TGCGGGGATAGGGCTAACAG         | miRNA | miR-744    |
| t0071062 | 22 | 1 TGCGGGGCTAGGGCCAACAGCA       | miRNA | miR-744    |
| t0073055 | 19 | 1 TGCGGGGCTAGGGCTAAAA          | miRNA | miR-744    |
| t0076789 | 24 | 1 TGCGGGGCTAGGGCTAACAGCCGA     | miRNA | miR-744    |
| t0078068 | 24 | 1 TGCGGAGCTAGGGCTAACAGCATC     | miRNA | miR-744    |
| t0081849 | 22 | 1 CGGGGCTAGGGCTAAAAGCAGA       | miRNA | miR-744    |
| t0090335 | 24 | 1 AAAGATGCCACGCTATGTAGAATA     | miRNA | miR-741-3p |
| t0090479 | 24 | 1 AAAGATGACACGCTATGTAGAATC     | miRNA | miR-741-3p |
| t0092922 | 24 | 1 GAAGATGCCACGCTATGTAGAATC     | miRNA | miR-741-3p |
| t0040886 | 23 | 1 GGAAGACTGAAGTGGAGAAGGGT      | miRNA | miR-739    |
| t0049328 | 22 | 1 GAAGCCTGAAGTGGAGAAGGGT       | miRNA | miR-739    |
| t0057586 | 22 | 1 GAAGACTGAGGTGGAGAAGGGT       | miRNA | miR-739    |
| t0059757 | 21 | 1 AAGACTGAAGGGGAGAAGGGT        | miRNA | miR-739    |
| t0063804 | 24 | 1 GAAGACTGAAGTAGAGAAGGGTTT     | miRNA | miR-739    |
| t0071540 | 22 | 1 AAGACTGAAGTGGGAAGGGTT        | miRNA | miR-739    |
| t0073510 | 22 | 1 GAAGAATGAAGTGGAGAAGGGT       | miRNA | miR-739    |
| t0080067 | 23 | 1 GAAGACTGAAGTGGGAAGGGTT       | miRNA | miR-739    |
| t0083476 | 25 | 1 GTGAAGACTGAAGTGGAGAAGGGTT    | miRNA | miR-739    |
| t0086485 | 21 | 1 AAGACTGCAGTGGAGAAGGGT        | miRNA | miR-739    |
| t0045409 | 24 | 1 GAAGACTGAAGCGGAGAAGGGTTT     | miRNA | miR-739    |
| t0048977 | 25 | 1 CGAAGACTGAAGTGGAGAAGGGTTT    | miRNA | miR-739    |
| t0091711 | 22 | 1 GAAGACTGAAGCGGAGAAGGGT       | miRNA | miR-739    |
| t0043240 | 24 | 1 TGGAGACTGAAGTGGAGAAGGGTT     | miRNA | miR-739    |
| t0043469 | 22 | 1 GAAGACTGAAGGGGATAAGGGT       | miRNA | miR-739    |
| t0045464 | 23 | 1 GAAGATTGAAGTGGAGAAGGGTT      | miRNA | miR-739    |
| t0046340 | 20 | 1 AAGACTGAAGTAGAGAAGGG         | miRNA | miR-739    |
| t0048219 | 21 | 1 GAAGACTGAAGTAGAGAAGGG        | miRNA | miR-739    |
| t0048775 | 24 | 1 TGAAGATTGAAGGGGAGAAGGGTT     | miRNA | miR-739    |
| t0050098 | 31 | 1 GAAGACTGAAGTGGAGAAGGGTTTATTG | miRNA | miR-739    |
| t0050232 | 23 | 1 TCAAGACTGAAGTGGAGAAGGGT      | miRNA | miR-739    |
| t0050652 | 20 | 1 CGAAGACTGAAGTGGAGAAG         | miRNA | miR-739    |
| t0053936 | 21 | 1 GATGACTGAAGTGGAGAAGGG        | miRNA | miR-739    |
| t0055530 | 20 | 1 GAAGTCTGAAGTGGAGAAGG         | miRNA | miR-739    |
| t0056171 | 24 | 1 GAAGATTGAAGTGGAGAAGGGTTT     | miRNA | miR-739    |
| t0056793 | 20 | 1 AAGACTGAAGGGGAGAAGGG         | miRNA | miR-739    |
| t0057628 | 23 | 1 TGATGACTGAAGTGGCGAAGGGT      | miRNA | miR-739    |
| t0059055 | 24 | 1 TGAGGATTGAAGTGGAGAAGGGTT     | miRNA | miR-739    |
| t0059452 | 22 | 1 AAGGCTGAAGTGGAGAAGGGTT       | miRNA | miR-739    |
| t0061011 | 25 | 1 TGCAGACTGAAGTGGAGAAGGGTTT    | miRNA | miR-739    |
| t0064362 | 23 | 1 TGAAGGCTGAAGTGGAGAAGGGT      | miRNA | miR-739    |
| t0065898 | 22 | 1 GAAGACTAAAGTGGATAAGGGT       | miRNA | miR-739    |
| t0066810 | 21 | 1 GAAGACTGAAGCGGAGAAGGG        | miRNA | miR-739    |
| t0069104 | 23 | 1 TAAGACTGAAGTGGAGAAGGGTT      | miRNA | miR-739    |
| t0070148 | 22 | 1 GAAGACTGAAGTGGGAAGGGT        | miRNA | miR-739    |
| t0073103 | 23 | 1 GAAGAATGAAGTGGAGAAGGGTT      | miRNA | miR-739    |
| t0073202 | 23 | 1 GAAGACTGGAGTGGAGAAGGGTT      | miRNA | miR-739    |
| t0074809 | 26 | 1 CTCTGAAGACTGAAGTGGAGAAGGGT   | miRNA | miR-739    |
| t0075309 | 22 | 1 GAAGACTGAAGAGGAGAAGGGT       | miRNA | miR-739    |
| t0076104 | 24 | 1 GAAGACTGAAGTCCGAGAAGGGTTT    | miRNA | miR-739    |
| t0076883 | 22 | 1 GACGACTGAAGTGGAGAAGGGT       | miRNA | miR-739    |
| t0077013 | 23 | 1 AAGACTGAAGTGGAGAAGGGTTT      | miRNA | miR-739    |
| t0080292 | 23 | 1 GAGGACTGAAGTGGAGAAGGGTT      | miRNA | miR-739    |
| t0081277 | 23 | 1 CAAGACTGAAGTGGAGAAGGGTT      | miRNA | miR-739    |
| t0081651 | 22 | 1 AAGACTTGAGTAGTGAGACGCT       | miRNA | miR-71b-5p |
| t0081987 | 23 | 1 TGAAAGACGATGGGAGTGAGATG      | miRNA | miR-71     |

|          |    |                              |       |            |
|----------|----|------------------------------|-------|------------|
| t0082484 | 23 | 1 AAAGACGATGGTAGTGAGATGTT    | miRNA | miR-71     |
| t0082662 | 24 | 1 TGAAAGACGATGGTAGTGAGATGT   | miRNA | miR-71     |
| t0084358 | 23 | 1 TGAAAGACGATGGTAGTGAGCTG    | miRNA | miR-71     |
| t0084483 | 22 | 1 TGAAAGACGATTGTAGTGAGAT     | miRNA | miR-71     |
| t0084662 | 22 | 1 TGAAAGACGATGGTAGTGAGAA     | miRNA | miR-71     |
| t0087171 | 24 | 1 TGGACGACTAGTGATTTTGTTGTT   | miRNA | miR-7      |
| t0087369 | 24 | 1 TGGAAGACTAGTGATTTTGTTGGT   | miRNA | miR-7      |
| t0088888 | 24 | 1 TGGAAGACTAGTGCTTTTGTTGTT   | miRNA | miR-7      |
| t0089927 | 23 | 1 ACTCGCTAGGGAAAATGATTGGA    | miRNA | miR-664*   |
| t0091550 | 22 | 1 ACCGGCTAGGGAAAATGATTGG     | miRNA | miR-664*   |
| t0092636 | 22 | 1 ACTGGCTAGGGCAAATGATTGG     | miRNA | miR-664*   |
| t0084885 | 26 | 1 CTGGCTGGGGAAAATGATTGGATATT | miRNA | miR-664*   |
| t0059709 | 23 | 1 ACTGGCTAGGGAAAACGATTGGA    | miRNA | miR-664*   |
| t0077539 | 26 | 1 GCTGGCTGGGGAAAATGATTGGAATC | miRNA | miR-664*   |
| t0086266 | 23 | 1 ACTGGCTAGGGAAAATGATTTGA    | miRNA | miR-664*   |
| t0086623 | 23 | 1 ACTGGCTAGGGAAAATGATTGGG    | miRNA | miR-664*   |
| t0088428 | 21 | 1 TACCATTGCATATCGGAGGT       | miRNA | miR-660    |
| t0090351 | 21 | 1 TACCATTGCATATCTGAGTT       | miRNA | miR-660    |
| t0068452 | 19 | 1 TACCTATTGCATATCGGAG        | miRNA | miR-660    |
| t0073458 | 21 | 1 TACCATTGTATATCGGAGTT       | miRNA | miR-660    |
| t0091498 | 21 | 1 TACCATTGCATATCGGGGTT       | miRNA | miR-660    |
| t0044279 | 22 | 1 TACCATTCCATATCGGAGTTG      | miRNA | miR-660    |
| t0051574 | 21 | 1 AATGGCGCCCCTAGGGTTGTG      | miRNA | miR-652    |
| t0055101 | 21 | 1 AATGGCGCCACTAGGGGTGTG      | miRNA | miR-652    |
| t0069023 | 21 | 1 AGGGCGCGCGGGGCGGGGCGG      | miRNA | miR-638    |
| t0075685 | 25 | 1 AGGGCGCGCGGGTTCGGGCGACGGA  | miRNA | miR-638    |
| t0080634 | 26 | 1 AGGGCGCGTGGGTTCGGGCGGCGGAC | miRNA | miR-638    |
| t0081573 | 26 | 1 AGGGCGCGTGGGTTCGGGAGGCGGCC | miRNA | miR-638    |
| t0081793 | 25 | 1 AGGGCGTTCGGGTTCGGGCGGCGGT  | miRNA | miR-638    |
| t0044580 | 26 | 1 AGGGCGCGCGGGTTCGGGCGGCGGAT | miRNA | miR-638    |
| t0044826 | 25 | 1 AGGGCGCGCGGGTTCGGGCGGCGGG  | miRNA | miR-638    |
| t0065376 | 26 | 1 AGGGCGCGTGGGGCGGGGCGGCGGCC | miRNA | miR-638    |
| t0078013 | 18 | 1 TCGGTTTACGTTGGGAGA         | miRNA | miR-629    |
| t0080227 | 19 | 1 AGGGTTTACGTTGGGAGAA        | miRNA | miR-629    |
| t0083225 | 19 | 1 CGGGTTTACGTTGGGAGAA        | miRNA | miR-629    |
| t0055637 | 19 | 1 TGGGTTTACGCTGGGAGAA        | miRNA | miR-629    |
| t0063400 | 19 | 1 TGGGTTTACGTTGGGAGGA        | miRNA | miR-629    |
| t0052671 | 18 | 1 TGGGATTACGTTGGGAGA         | miRNA | miR-629    |
| t0053867 | 19 | 1 TGGGTTTTCGTTGGGAGAA        | miRNA | miR-629    |
| t0063911 | 19 | 1 TGGGATTACGTTGGGAGAA        | miRNA | miR-629    |
| t0083495 | 18 | 1 TGGGTTTACGTTGGGAGC         | miRNA | miR-629    |
| t0084863 | 18 | 1 TGGGTTTAAGTTGGGAGA         | miRNA | miR-629    |
| t0089297 | 18 | 1 TGGGTTTACGTTGGGAGG         | miRNA | miR-629    |
| t0090603 | 20 | 1 TCTAGTAAGAGTGGCAGGAG       | miRNA | miR-628-3p |
| t0092963 | 21 | 1 TTCTAGTAAGAGTGGCAGGGG      | miRNA | miR-628-3p |
| t0054756 | 20 | 1 TCTAGTAAGAGTGGCAGACG       | miRNA | miR-628-3p |
| t0056934 | 20 | 1 TCTAGTAAGAGTGACAGTCG       | miRNA | miR-628-3p |
| t0059248 | 20 | 1 TCTAGTAAGAGTGGCAGGGG       | miRNA | miR-628-3p |
| t0060199 | 23 | 1 GACTATAGAAATTTCCCCCTGAA    | miRNA | miR-625*   |
| t0063263 | 20 | 1 GACTATAGAAGTTTCCCCCT       | miRNA | miR-625*   |
| t0065351 | 20 | 1 TAGTACCAGGACCTTGTGTT       | miRNA | miR-624*   |
| t0075109 | 22 | 1 TAGTACCAGTACATTGTGTTCA     | miRNA | miR-624*   |
| t0089050 | 21 | 1 AAGTACCAGTACCTTGTGTTC      | miRNA | miR-624*   |
| t0091386 | 22 | 1 AAGTCATTGGAGGGGTTGAGCA     | miRNA | miR-616    |
| t0092293 | 19 | 1 TATGTCATCGTTGTCATCG        | miRNA | miR-598    |
| t0092427 | 21 | 1 TACGTCATCGTTGTCATTGTC      | miRNA | miR-598    |
| t0048824 | 20 | 1 TACGTCATCGCTGTCATCGT       | miRNA | miR-598    |
| t0053556 | 22 | 1 TACGTCATCGCTGTCATCGTCA     | miRNA | miR-598    |

|          |    |                             |       |             |
|----------|----|-----------------------------|-------|-------------|
| t0062074 | 22 | 1 TACGGCATCGTTGTCATCGTCA    | miRNA | miR-598     |
| t0063408 | 25 | 1 TACGTCATCGTCGTCATCGTCAATT | miRNA | miR-598     |
| t0093415 | 22 | 1 TACGACATCGTTGTCATCGTCA    | miRNA | miR-598     |
| t0043012 | 22 | 1 TACGTCATCGTTGTTATGGTCA    | miRNA | miR-598     |
| t0044156 | 22 | 1 TACGTCCTCGTTGTCATCGTCA    | miRNA | miR-598     |
| t0051531 | 22 | 1 AACGTCATCGTTGTCATCGTCA    | miRNA | miR-598     |
| t0063669 | 22 | 1 TAAGTCATCGTTGTCATCGTCA    | miRNA | miR-598     |
| t0089098 | 24 | 1 TACGTCATCGTTGTCATCGTCCTT  | miRNA | miR-598     |
| t0071325 | 19 | 1 TACGTCATCGTTGTAATCG       | miRNA | miR-598     |
| t0041087 | 22 | 1 TACGTCATCGTTGTCATGGTCA    | miRNA | miR-598     |
| t0045020 | 22 | 1 TACGTCATCGTTGTAATCGTCA    | miRNA | miR-598     |
| t0047378 | 22 | 1 TACGTCATCGTTGTCATCGCCA    | miRNA | miR-598     |
| t0049338 | 21 | 1 AACGTCATCGTTGTCATCGTC     | miRNA | miR-598     |
| t0056334 | 22 | 1 TACGTCATCGTTATCATCGTCA    | miRNA | miR-598     |
| t0057844 | 21 | 1 TACCTCATCGTTGTCATCGTC     | miRNA | miR-598     |
| t0060853 | 22 | 1 TACGTCATCGTTGTCATCATCA    | miRNA | miR-598     |
| t0061489 | 22 | 1 TACGTAATCGTTGTCATCGTCA    | miRNA | miR-598     |
| t0063382 | 21 | 1 TACGTCATCGTTGTCATCGAC     | miRNA | miR-598     |
| t0064152 | 21 | 1 GAGCTTATTCATAAAAAGTGAA    | miRNA | miR-590-5p  |
| t0064206 | 22 | 1 GAGCTTATTCATAAAAAGGGCAA   | miRNA | miR-590-5p  |
| t0068474 | 21 | 1 GAGCTTATTAATAAAAAGTGCA    | miRNA | miR-590-5p  |
| t0071075 | 22 | 1 GAGCTTATTCATAAAAAGGGCAG   | miRNA | miR-590-5p  |
| t0071534 | 22 | 1 AGAACAAATACCGTTCCAG       | miRNA | miR-589*    |
| t0079624 | 21 | 1 TGAGAATCACGTCTGCTCTGA     | miRNA | miR-589     |
| t0080169 | 21 | 1 TTATGGTTTGCCTGAGACTGA     | miRNA | miR-584     |
| t0080476 | 21 | 1 TTATGGTTTGTCTGGGACTGA     | miRNA | miR-584     |
| t0081082 | 21 | 1 TTATGGTTTGCCTGGGAATGA     | miRNA | miR-584     |
| t0084346 | 21 | 1 TTATGGTTTACCTGGGACTGA     | miRNA | miR-584     |
| t0085452 | 21 | 1 TTATGGATTGCCTGGGACTGA     | miRNA | miR-584     |
| t0089693 | 21 | 1 TTATGGTTTGCCTGGGGCTGT     | miRNA | miR-584     |
| t0090650 | 21 | 1 TTATGGTTTGCCTGGGACTGA     | miRNA | miR-584     |
| t0052193 | 21 | 1 TTATGGTTTGCCTGGGCCTGA     | miRNA | miR-584     |
| t0054392 | 21 | 1 TTCTGGTTTGCCTGGGACTGA     | miRNA | miR-584     |
| t0072764 | 21 | 1 TTATGGTTTGCCTGGGACTGC     | miRNA | miR-584     |
| t0088788 | 21 | 1 TTATGGTTTGTCTGGGGCTGA     | miRNA | miR-584     |
| t0077220 | 21 | 1 TTATGCTTTCCTGGGACTGA      | miRNA | miR-584     |
| t0092769 | 22 | 1 ATTATGGTTTGCCTGGGACTGC    | miRNA | miR-584     |
| t0043659 | 21 | 1 TTATGGTCTGCCTGGGACTGA     | miRNA | miR-584     |
| t0044583 | 22 | 1 TTATGGTTTGCCTGGGACTGCT    | miRNA | miR-584     |
| t0048192 | 19 | 1 GAGATGTGGA AAAAATTGGA     | miRNA | miR-576-3p  |
| t0049805 | 22 | 1 AAAGTAATTGCAGTTTTTGACT    | miRNA | miR-548w    |
| t0056972 | 21 | 1 CAAAGGTGATCGTGGTTTTTG     | miRNA | miR-548t    |
| t0061108 | 19 | 1 CAAAAGTGCTCGTGGTTTT       | miRNA | miR-548t    |
| t0062065 | 19 | 1 CAAAAGGGATCGTGGTTTT       | miRNA | miR-548t    |
| t0065293 | 21 | 1 AGAAGTATTTGCGGGTTTTGT     | miRNA | miR-548l    |
| t0066033 | 21 | 1 AAAAGGATTTGCGGGTTTTGT     | miRNA | miR-548l    |
| t0075361 | 22 | 1 AAACGTAATTGCGGATTTTGCT    | miRNA | miR-548k    |
| t0081760 | 22 | 1 AAAAGTAATTGCTGATTTTGCT    | miRNA | miR-548k    |
| t0083792 | 19 | 1 AAAGTAATCATGGTCTTTG       | miRNA | miR-548j    |
| t0088443 | 20 | 1 AAAAACTGAGACTACTATTG      | miRNA | miR-548e    |
| t0092504 | 22 | 1 AAAAACTGAGACTACTTTTCGCA   | miRNA | miR-548e    |
| t0093022 | 22 | 1 AAAGTGATTGTGGTCTTTGTCA    | miRNA | miR-548d-5p |
| t0064075 | 22 | 1 AAACGGCAATGATTTTGTACA     | miRNA | miR-548al   |
| t0059857 | 21 | 1 AAAAGGAATTGCGGTTTTTGA     | miRNA | miR-548ak   |
| t0060309 | 20 | 1 AAAAGTAATTGCGGTTTTTG      | miRNA | miR-548ak   |
| t0068337 | 19 | 1 AACCACAATTACCTTTGCA       | miRNA | miR-548aa   |
| t0090453 | 18 | 1 TACAGTTTGATAACTGAA        | miRNA | miR-542-3p  |
| t0061764 | 24 | 1 AAGGGATTCTGATGTTGGTCAATC  | miRNA | miR-541     |



|          |    |                                |       |            |
|----------|----|--------------------------------|-------|------------|
| t0069474 | 23 | 1 AGGGGATTCTGATGTTGGTCATC      | miRNA | miR-541    |
| t0050193 | 19 | 1 CGGGAAGGAATTCTGATAT          | miRNA | miR-541    |
| t0051596 | 21 | 1 CATGCCTTGAGGGTAGGACCG        | miRNA | miR-532-5p |
| t0053482 | 23 | 1 CATGCCTTGAGTGTAGGACCGTC      | miRNA | miR-532-5p |
| t0044496 | 21 | 1 CATGCCTTGAGTGTAGGAACG        | miRNA | miR-532-5p |
| t0073449 | 22 | 1 CATGCCTTGAGTGTAGGACAGT       | miRNA | miR-532-5p |
| t0055220 | 22 | 1 CATGCCCTGAGTGTAGGACCGT       | miRNA | miR-532-5p |
| t0053265 | 23 | 1 CATGCCTTGAGTGTAGGCCCGTA      | miRNA | miR-532-5p |
| t0046759 | 23 | 1 CATGCCTTGAGTGTAGGACTGTT      | miRNA | miR-532-5p |
| t0069620 | 22 | 1 CATGCCTTGAGAGTAGGACCGT       | miRNA | miR-532-5p |
| t0065798 | 19 | 1 CCCACACCCAAGGCTTGAA          | miRNA | miR-532-3p |
| t0077657 | 21 | 1 CCTCCACACCTAAGGCTTGC         | miRNA | miR-532-3p |
| t0060901 | 21 | 1 CTCCACACCCAAGGCTTGCC         | miRNA | miR-532-3p |
| t0062672 | 22 | 1 CCTCCACGCCCAAGGCTTGCA        | miRNA | miR-532-3p |
| t0073318 | 22 | 1 GCTCCACACCCAAGGCTTGCA        | miRNA | miR-532-3p |
| t0046110 | 22 | 1 CCTCCACACCCAAGGGTTGCA        | miRNA | miR-532-3p |
| t0061352 | 22 | 1 CCTCCACACCCAAGCTTGCA         | miRNA | miR-532-3p |
| t0064517 | 22 | 1 CCTCCACACTCAAGGCTTGCC        | miRNA | miR-532-3p |
| t0066924 | 21 | 1 TTCCACACACAAGGCTTGCA         | miRNA | miR-532-3p |
| t0072500 | 21 | 1 CCTCCACACACAAGGCTTGC         | miRNA | miR-532-3p |
| t0084668 | 21 | 1 CCTCCACACCAAGGCTTGC          | miRNA | miR-532-3p |
| t0085713 | 22 | 1 CCTCCACACTCAAGGCTTGGA        | miRNA | miR-532-3p |
| t0090903 | 22 | 1 CCTCCACACCCAAGGCTTGCA        | miRNA | miR-532-3p |
| t0044594 | 22 | 1 CCTCCACACCCAAGGCTTCCA        | miRNA | miR-532-3p |
| t0045231 | 21 | 1 CCTCCACACCCAAGGCTTTC         | miRNA | miR-532-3p |
| t0048841 | 22 | 1 CCTCCACACGCAAGGCTTGCA        | miRNA | miR-532-3p |
| t0049165 | 22 | 1 CTTCCCCACCCAAGGCTTGCA        | miRNA | miR-532-3p |
| t0049196 | 22 | 1 CCTACCACACCCAAGGCTTGCA       | miRNA | miR-532-3p |
| t0050322 | 22 | 1 CCTCCACACAAAAGGCTTGCA        | miRNA | miR-532-3p |
| t0051215 | 20 | 1 CCTCCACACCTAAGGCTTG          | miRNA | miR-532-3p |
| t0056011 | 22 | 1 CCTCCACACCCAAGGCTTGCA        | miRNA | miR-532-3p |
| t0057503 | 22 | 1 CCTCCACACCCAAGACTTGCA        | miRNA | miR-532-3p |
| t0059150 | 22 | 1 CCACCCACACCCAAGGCTTGCA       | miRNA | miR-532-3p |
| t0060181 | 22 | 1 ACTCCACACCCAAGGCTTGCT        | miRNA | miR-532-3p |
| t0062961 | 22 | 1 CATCCACACCCAAGGCTTGCA        | miRNA | miR-532-3p |
| t0063462 | 20 | 1 CCTCCACACCCATGGCTTG          | miRNA | miR-532-3p |
| t0064296 | 23 | 1 ACCTCCCGCACCCAAGGCTTGCA      | miRNA | miR-532-3p |
| t0064328 | 22 | 1 CCTCCACACCCAAGTCTTGCA        | miRNA | miR-532-3p |
| t0064485 | 22 | 1 ACTCCACACCCAAGGCTTGCA        | miRNA | miR-532-3p |
| t0065551 | 20 | 1 CATCCACACCCAAGGCTTG          | miRNA | miR-532-3p |
| t0067490 | 20 | 1 CCTCTCACACCCAAGGCTTG         | miRNA | miR-532-3p |
| t0069044 | 20 | 1 CCTCCCGCACCCAAGGCTTG         | miRNA | miR-532-3p |
| t0071159 | 28 | 1 TGGTGCGGACCAGGGGCATCCGACTGTT | miRNA | miR-5109   |
| t0074341 | 29 | 1 CTGGGGCGGACCAGGGGAATCCGACTGT | miRNA | miR-5109   |
| t0077026 | 22 | 1 AGTTATAGCATCTGGATGGTTT       | miRNA | miR-5108   |
| t0077583 | 22 | 1 TCTGGGCACAGACGGATGGACA       | miRNA | miR-5107   |
| t0078814 | 20 | 1 TGGGCACAGGCGGATGGACC         | miRNA | miR-5107   |
| t0079127 | 24 | 1 TCTGGGCAAAGGCGGATGGACAGA     | miRNA | miR-5107   |
| t0079177 | 20 | 1 TCTGGGCACCGGCGGATGGA         | miRNA | miR-5107   |
| t0082498 | 24 | 1 TCTGGGCACAGGCGGATGGGACAGA    | miRNA | miR-5107   |
| t0084467 | 22 | 1 TCTGGGCACGGGCGGATGGACA       | miRNA | miR-5107   |
| t0084963 | 22 | 1 TCTGGGCACAGGAGGATGGACA       | miRNA | miR-5107   |
| t0088020 | 21 | 1 TCTGGGCACAGGCGGATGGAC        | miRNA | miR-5107   |
| t0089077 | 22 | 1 TCTGGGGACAGGCGGATGGACA       | miRNA | miR-5107   |
| t0091777 | 21 | 1 TCTGGGCACAGGCGGATGGAG        | miRNA | miR-5107   |
| t0046968 | 23 | 1 TCTGGGCACAGGCGGATGGACCA      | miRNA | miR-5107   |
| t0081167 | 23 | 1 TGGGCACAGGCGGATGGGCAGGT      | miRNA | miR-5107   |
| t0061786 | 22 | 1 TCTGGCCACAGGCGGATGGACA       | miRNA | miR-5107   |

|          |    |                               |       |            |
|----------|----|-------------------------------|-------|------------|
| t0041471 | 22 | 1 TCTCGGCACAGGCGGATGGACA      | miRNA | miR-5107   |
| t0042689 | 24 | 1 TCTGGACACAGGCGGATGGACAGA    | miRNA | miR-5107   |
| t0043912 | 23 | 1 TGGGCACAGGCGGATGGACGGGT     | miRNA | miR-5107   |
| t0044892 | 24 | 1 TCTGGGCACAGGAGGATGGACAGA    | miRNA | miR-5107   |
| t0045789 | 24 | 1 TCTGGGCAAAGGCGGATGGACAGT    | miRNA | miR-5107   |
| t0047894 | 24 | 1 TATGGGCACAGGCGGATGGACAGA    | miRNA | miR-5107   |
| t0052487 | 23 | 1 TCTGGGCACAGCCGGATGGACAA     | miRNA | miR-5107   |
| t0052572 | 24 | 1 TCTGGGCACCGGCGGATGGACAGT    | miRNA | miR-5107   |
| t0053680 | 22 | 1 TCTGGGCACAGGCGAATGGACA      | miRNA | miR-5107   |
| t0054192 | 21 | 1 TCTGGGCACAGGCGGATGGAA       | miRNA | miR-5107   |
| t0056935 | 20 | 1 TGGGCACAGGCGGAGGGACA        | miRNA | miR-5107   |
| t0058850 | 22 | 1 TCTGTGCACAGGCGGATGGACA      | miRNA | miR-5107   |
| t0061421 | 22 | 1 TCTGGGTACAGGCGGATGGACA      | miRNA | miR-5107   |
| t0061517 | 22 | 1 TCGAATCCCAGCGGTGCCTCCC      | miRNA | miR-5100   |
| t0063572 | 22 | 1 TCGAATCCCAGCGGAGCCTCCA      | miRNA | miR-5100   |
| t0065019 | 21 | 1 GGGAGCAAGGAAGTATTGATG       | miRNA | miR-505*   |
| t0069801 | 23 | 1 GGAAGCCAGGAAGTATTGATGTT     | miRNA | miR-505*   |
| t0069907 | 22 | 1 GGGAGGGCAGGGCAGGGTTTCC      | miRNA | miR-504*   |
| t0071638 | 21 | 1 TAGCAGTGGGAACAGTTCTAA       | miRNA | miR-503    |
| t0072436 | 21 | 1 TAGCAGCGGGAACAGCTCTGA       | miRNA | miR-503    |
| t0073619 | 20 | 1 TAGCAGCGGAAACAGTTCTA        | miRNA | miR-503    |
| t0076029 | 19 | 1 TAGCAGCGGGAACAGTTTT         | miRNA | miR-503    |
| t0078497 | 21 | 1 TAGCAGCGGGAACAGTTCCGA       | miRNA | miR-503    |
| t0079033 | 21 | 1 TAGCAGCGGGAATAGTTCTGA       | miRNA | miR-503    |
| t0079212 | 21 | 1 TAGCAGCGGGAAGTTCTGA         | miRNA | miR-503    |
| t0084739 | 18 | 1 AATCCTTGATATCTGGGT          | miRNA | miR-500b   |
| t0070103 | 26 | 1 CTTGCTATCTGGGCATGATACTATGA  | miRNA | miR-500b   |
| t0077242 | 21 | 1 TTAGGACTTGCACTGATGTTT       | miRNA | miR-499-5p |
| t0041301 | 23 | 1 TGGTAAGACTGTAGTTGATGTTT     | miRNA | miR-499    |
| t0081538 | 22 | 1 GTAAGACTGTAGTTGATGTTT       | miRNA | miR-499    |
| t0063060 | 22 | 1 GGTAAGACTGTAGTTGATGTTT      | miRNA | miR-499    |
| t0044283 | 23 | 1 TAAGACTGTAGTTGATGTTATTT     | miRNA | miR-499    |
| t0053395 | 21 | 1 TAAGACTGTAGTTGATGTTAT       | miRNA | miR-499    |
| t0057789 | 22 | 1 AAACAAACATGGCGCACTTCTT      | miRNA | miR-495    |
| t0076361 | 22 | 1 AAACAAACATGGGGCACTTCTT      | miRNA | miR-495    |
| t0079371 | 23 | 1 TCCTGTACTTAGCTGCCCGAGT      | miRNA | miR-486-5p |
| t0092706 | 22 | 1 TCCTGTACTGTGTTGCCCGAG       | miRNA | miR-486-5p |
| t0093427 | 23 | 1 TCTTGTACTGAGCTGCCCGGGA      | miRNA | miR-486-5p |
| t0051986 | 28 | 1 TCCTGTACTGAGCTGCCCAAGACGGCT | miRNA | miR-486-5p |
| t0053336 | 28 | 1 CCCTGTACTGAGCTGCCCGAGACGGGA | miRNA | miR-486-5p |
| t0051311 | 19 | 1 TGTAAGACTGAGCTGCCCGAG       | miRNA | miR-486-5p |
| t0044885 | 24 | 1 TCCTGTACTGCGCTGCCCGAGAA     | miRNA | miR-486-5p |
| t0063380 | 21 | 1 TTCTGTACTGAGTTGCCCGA        | miRNA | miR-486-5p |
| t0065827 | 26 | 1 TCCTGTACTGAGCTGCCAGCGCAAG   | miRNA | miR-486-5p |
| t0083844 | 21 | 1 TCCTGTACTGAACTGCCACGA       | miRNA | miR-486-5p |
| t0092902 | 21 | 1 TCCTGTACTGAGCTGACCCGT       | miRNA | miR-486-5p |
| t0062890 | 22 | 1 TCCTGTACTGCGCTGCCCGAA       | miRNA | miR-486-5p |
| t0067280 | 21 | 1 TCCTGTACTGCGCTGCCCAA        | miRNA | miR-486-5p |
| t0040872 | 20 | 1 TCTGTACTGAGCTGACCCGA        | miRNA | miR-486-5p |
| t0040920 | 24 | 1 TCCTGTACTGAACTGCCCGAGAA     | miRNA | miR-486-5p |
| t0040979 | 29 | 1 TCCTGTACTGAGCTGCCCGAGGCGGCC | miRNA | miR-486-5p |
| t0041061 | 20 | 1 CTGTACTGAGCTGCCCGGG         | miRNA | miR-486-5p |
| t0041120 | 24 | 1 TCCTGTACTGAGCTGACCCGAGGA    | miRNA | miR-486-5p |
| t0041217 | 29 | 1 TCCTGTACCGAGCTGCCCGAGACGGCT | miRNA | miR-486-5p |
| t0041219 | 23 | 1 CCCTGTACTGAGCTGCCCGAGT      | miRNA | miR-486-5p |
| t0041341 | 21 | 1 TCTTGTACTGAGCTGCCACGA       | miRNA | miR-486-5p |
| t0041412 | 23 | 1 TCCTGAACTGAGCTGCCCGAGT      | miRNA | miR-486-5p |
| t0041432 | 20 | 1 TCCTGTACTGAGCTGCCCGG        | miRNA | miR-486-5p |

|          |    |                                  |       |            |
|----------|----|----------------------------------|-------|------------|
| t0041472 | 18 | 1 TCCTG TACTGAGGTGCCC            | miRNA | miR-486-5p |
| t0041595 | 22 | 1 TTCTG TACTGAGCTGCCCGAG         | miRNA | miR-486-5p |
| t0041602 | 18 | 1 TCCTG TACTGCGCTGCCC            | miRNA | miR-486-5p |
| t0041607 | 21 | 1 TACTG TACTGAGCTGCTCCGA         | miRNA | miR-486-5p |
| t0041709 | 26 | 1 TCCTG TACTGAGATGCCCCGAGAAGA    | miRNA | miR-486-5p |
| t0041911 | 21 | 1 TCTTG TTCTGAGCTGCCCCGA         | miRNA | miR-486-5p |
| t0042016 | 22 | 1 TTCTG TACTGAGATGCCCCGAG        | miRNA | miR-486-5p |
| t0042141 | 20 | 1 TCCTG TCCTGAGCTGCCCCG          | miRNA | miR-486-5p |
| t0042267 | 23 | 1 TCCTG TACTGAGCTGCCACGAGG       | miRNA | miR-486-5p |
| t0042341 | 23 | 1 TCCTG TACTGAGCTGCCCCGTGA       | miRNA | miR-486-5p |
| t0042414 | 24 | 1 TCCTG TACTGAGCTGCCCCGAGCT      | miRNA | miR-486-5p |
| t0042550 | 21 | 1 TCCTG TACTGCGCTCCCCCGA         | miRNA | miR-486-5p |
| t0042692 | 20 | 1 TCCTG TACTGAGCTGCCAAG          | miRNA | miR-486-5p |
| t0042768 | 22 | 1 TACTG TACTGAGCTGCCCCGAA        | miRNA | miR-486-5p |
| t0042998 | 24 | 1 TCCTG TAATGAGCTGCCCCGAGAT      | miRNA | miR-486-5p |
| t0043009 | 22 | 1 TCCTG TACTGGGCTGCCCTGAG        | miRNA | miR-486-5p |
| t0043104 | 22 | 1 TCCTG TACTGAGCTGCCCCAAA        | miRNA | miR-486-5p |
| t0043382 | 22 | 1 ACCTG TACTGAGCTGCTCCGAG        | miRNA | miR-486-5p |
| t0043490 | 23 | 1 TCTTG TACTGAGGTGCCCCGAGA       | miRNA | miR-486-5p |
| t0043515 | 23 | 1 TTCTG TACTGAGCTGCCCCGCGT       | miRNA | miR-486-5p |
| t0043822 | 24 | 1 TCCTG TACTGAGCTGTCCCGAGAA      | miRNA | miR-486-5p |
| t0043957 | 22 | 1 TCCTG TAATGAGCTGCCCCGAT        | miRNA | miR-486-5p |
| t0043963 | 20 | 1 TCCTG TACTGAGGTGCCCCG          | miRNA | miR-486-5p |
| t0044392 | 22 | 1 TTCCG TACTGAGCTGCCCCGAG        | miRNA | miR-486-5p |
| t0044462 | 26 | 1 TCCTG TACTGAGCTGCCCCAAGATGG    | miRNA | miR-486-5p |
| t0044478 | 23 | 1 TCCTG TACTTAGCTGCCCCGAGA       | miRNA | miR-486-5p |
| t0044505 | 28 | 1 TCCTG TACTGAGCTGCCCCGCGACTGCA  | miRNA | miR-486-5p |
| t0044832 | 20 | 1 TTGTAT TTAGCTGCCCCGAG          | miRNA | miR-486-5p |
| t0045212 | 25 | 1 TCCTG TACTGAGCTGACCCGAGAGA     | miRNA | miR-486-5p |
| t0045242 | 22 | 1 TCCTG TGCTGAGCTGCTCCGAG        | miRNA | miR-486-5p |
| t0045344 | 21 | 1 TCTTG CACTGAGCTGCCCCGA         | miRNA | miR-486-5p |
| t0045467 | 24 | 1 TCCTG TACTGAGATGCCCCGAGAT      | miRNA | miR-486-5p |
| t0045718 | 24 | 1 TCCTG TACTGAGCTGCCTCGAGAT      | miRNA | miR-486-5p |
| t0045821 | 20 | 1 CTGTG CTGAGCTGCCCCGAG          | miRNA | miR-486-5p |
| t0045964 | 23 | 1 TTCTG TACTGAGCTGCCCCGAGG       | miRNA | miR-486-5p |
| t0046084 | 23 | 1 TCCTG TACTGAGCTACCCCGAGT       | miRNA | miR-486-5p |
| t0046118 | 22 | 1 TCCTG TACTTAGCTCCCCCGAG        | miRNA | miR-486-5p |
| t0046130 | 28 | 1 ACCTG TACTGAGCTGCCCCGAGCGGCAT  | miRNA | miR-486-5p |
| t0046332 | 19 | 1 CCCTG TACTGAGCTGCCCC           | miRNA | miR-486-5p |
| t0046442 | 21 | 1 TCTTG TACTGAGCTGCACCGA         | miRNA | miR-486-5p |
| t0046610 | 22 | 1 TCATG TACTAAGCTGCCCCGAG        | miRNA | miR-486-5p |
| t0046658 | 19 | 1 TTGTACT GAGCTGCACCGA           | miRNA | miR-486-5p |
| t0047024 | 25 | 1 TCCTG TACTGAGCTGCCCCGAGGGG     | miRNA | miR-486-5p |
| t0047473 | 22 | 1 TCCTG TCCTGAGCTGTCCCGAG        | miRNA | miR-486-5p |
| t0047519 | 24 | 1 TCCTG TACTGAGCTGCCCCGGGAT      | miRNA | miR-486-5p |
| t0047731 | 25 | 1 TGTA CTGAGCTGCCCCGAGACGGCA     | miRNA | miR-486-5p |
| t0047974 | 20 | 1 TCCGG TACTGAGCTGTCCCG          | miRNA | miR-486-5p |
| t0047985 | 21 | 1 ACCTG TACTGAGCTGCCCCAA         | miRNA | miR-486-5p |
| t0048010 | 22 | 1 TCCTG TAATGAGCTGCCACGAG        | miRNA | miR-486-5p |
| t0048057 | 21 | 1 TCCTG TACTGCGCTGTCCCGA         | miRNA | miR-486-5p |
| t0048271 | 22 | 1 TCCAG TACTGAACTGCCCCGAG        | miRNA | miR-486-5p |
| t0048286 | 26 | 1 TCCTG TACTGAGCTGCCACGAGACGG    | miRNA | miR-486-5p |
| t0048343 | 28 | 1 TCCTG AACTGAGCTGCCCCGAGCCCGCA  | miRNA | miR-486-5p |
| t0048373 | 20 | 1 TTGC ACTGAGCTGCCCCGAG          | miRNA | miR-486-5p |
| t0048390 | 23 | 1 TCCGG TACTGAGCTGCCCCGAGT       | miRNA | miR-486-5p |
| t0048614 | 22 | 1 TCCTG TACTGAGCTGCCCCGCC        | miRNA | miR-486-5p |
| t0048831 | 23 | 1 TCCTG TACTGAGCTGCACCGCGA       | miRNA | miR-486-5p |
| t0048843 | 29 | 1 TCCTG TACTGAGCTGCCCCGAGACGGAA( | miRNA | miR-486-5p |

|          |    |                                  |       |            |
|----------|----|----------------------------------|-------|------------|
| t0049054 | 21 | 1 TCCTG TACTGCGCTGCCCCGT         | miRNA | miR-486-5p |
| t0049058 | 23 | 1 TCCTG TCCTGAGCTGCCCCGAGT       | miRNA | miR-486-5p |
| t0049089 | 22 | 1 TCCTG TACTGAGATGTCCCGAG        | miRNA | miR-486-5p |
| t0049186 | 21 | 1 TCCTG TACTGAGCTGCTCCGC         | miRNA | miR-486-5p |
| t0049305 | 22 | 1 TCCTG TACTGTGCTGTCCCGAG        | miRNA | miR-486-5p |
| t0049342 | 20 | 1 CTG TACTGAGCCGCCCGAG           | miRNA | miR-486-5p |
| t0049593 | 29 | 1 TCCTG TACTGAGCTGCCCCGTGATGAGCC | miRNA | miR-486-5p |
| t0049699 | 22 | 1 TCCTG TACTGCGCTGTCCCGAG        | miRNA | miR-486-5p |
| t0049704 | 23 | 1 TCCTG TACTGAGCTGCCCCGTGC       | miRNA | miR-486-5p |
| t0049736 | 26 | 1 TCCTG TACTAAGCTGCCCCGAGGTCC    | miRNA | miR-486-5p |
| t0049907 | 23 | 1 TCCTG TACTGAGCTGGCCCGAGT       | miRNA | miR-486-5p |
| t0049983 | 21 | 1 TCCTG TACTGAGATGCCTCGA         | miRNA | miR-486-5p |
| t0050095 | 22 | 1 TCCTG TATTGAGCTGCCCCGAT        | miRNA | miR-486-5p |
| t0050112 | 22 | 1 TCCTG TACTGAGCTGCACCGAT        | miRNA | miR-486-5p |
| t0050179 | 21 | 1 TCCTG TACCGAGCTGCCCCGC         | miRNA | miR-486-5p |
| t0050235 | 23 | 1 TCCTC TACTGAGCTGCCCCGAGG       | miRNA | miR-486-5p |
| t0050451 | 27 | 1 TCTA TACTGAGCTGCCCCGAGACGGCA   | miRNA | miR-486-5p |
| t0050472 | 21 | 1 TCCTG TAAATGAGCTGTCCCGA        | miRNA | miR-486-5p |
| t0050571 | 23 | 1 TCCTG TACTGAGATGCCCCGCGT       | miRNA | miR-486-5p |
| t0050801 | 28 | 1 TCCTG CACTGAGCTGCCCTGAGACGGCT  | miRNA | miR-486-5p |
| t0051057 | 20 | 1 TCCTG TACTGAGCGGCCCCG          | miRNA | miR-486-5p |
| t0051061 | 24 | 1 TCCTG TACTGAGCTGCCCCGGGA       | miRNA | miR-486-5p |
| t0051433 | 19 | 1 CTATA TCTGAGCTGCCCCGA          | miRNA | miR-486-5p |
| t0051975 | 18 | 1 CTG TACTGAGCTGACCCG            | miRNA | miR-486-5p |
| t0052134 | 22 | 1 TCTT G TACTGAGCTGCCCAGAG       | miRNA | miR-486-5p |
| t0052150 | 21 | 1 TCCCG TACTGAGCTGCCCCGT         | miRNA | miR-486-5p |
| t0052200 | 21 | 1 TCCTG GACTGAGCTGACCCGA         | miRNA | miR-486-5p |
| t0052414 | 22 | 1 TCCTG TACTGAGCCGCCCCGAC        | miRNA | miR-486-5p |
| t0052425 | 21 | 1 TACTG TACTGAGATGCCCCGA         | miRNA | miR-486-5p |
| t0053001 | 20 | 1 TCCTG TACTGAGCTGACACG          | miRNA | miR-486-5p |
| t0053032 | 18 | 1 TCCTG TACTGAGCTGCGC            | miRNA | miR-486-5p |
| t0053157 | 22 | 1 TCCTG TACTGAGCTGGACCGAG        | miRNA | miR-486-5p |
| t0053309 | 19 | 1 TTG TACTGAGCTGCTCCGA           | miRNA | miR-486-5p |
| t0053333 | 22 | 1 TCCTG TACTAAGCTGCCCCGAA        | miRNA | miR-486-5p |
| t0053539 | 19 | 1 TGTACT GAGCTGCCCCGCA           | miRNA | miR-486-5p |
| t0053559 | 20 | 1 TCTTATA TCTGAGCTGCCCCG         | miRNA | miR-486-5p |
| t0053956 | 21 | 1 TGCTG TACTGAGCTGCTCCGA         | miRNA | miR-486-5p |
| t0054277 | 28 | 1 TCCTG TACTGAGCTGCCCCGAGACGCCG  | miRNA | miR-486-5p |
| t0054575 | 21 | 1 TCCTG TACTGAGCCGCCCCGC         | miRNA | miR-486-5p |
| t0054605 | 24 | 1 TCCTG TACTGAGCTACCCCGAGTT      | miRNA | miR-486-5p |
| t0054995 | 20 | 1 CTG TACTGCGCTGCCCCGAG          | miRNA | miR-486-5p |
| t0055225 | 22 | 1 TCCTG TACTGTGCTGCCCCGAT        | miRNA | miR-486-5p |
| t0055820 | 20 | 1 TCCTG TACTAAGCTGCCCCG          | miRNA | miR-486-5p |
| t0055978 | 24 | 1 TCCTG TACTGAGCAGCCCCGAGAA      | miRNA | miR-486-5p |
| t0056056 | 22 | 1 TCCTG TACTGACCTGCCCCGAA        | miRNA | miR-486-5p |
| t0056074 | 22 | 1 TCCTG GACTGAGCTGACCCGAG        | miRNA | miR-486-5p |
| t0056469 | 23 | 1 TCCTG TACTGAGCTGCCGCGAGA       | miRNA | miR-486-5p |
| t0056580 | 21 | 1 TCCTG TACTGAGCGGCCCCAA         | miRNA | miR-486-5p |
| t0056618 | 22 | 1 TCCTG TAAATAAGCTGCCCCGAG       | miRNA | miR-486-5p |
| t0056711 | 22 | 1 CCCTG TACTGAGCTGCCCCGAT        | miRNA | miR-486-5p |
| t0056756 | 22 | 1 GCCTG TACTGAGCTGCCCCGCG        | miRNA | miR-486-5p |
| t0056896 | 27 | 1 TCCTG TACTGAGCTGCCGCGACGCTAC   | miRNA | miR-486-5p |
| t0056973 | 19 | 1 TGTACT GAGGTGCCCCGAA           | miRNA | miR-486-5p |
| t0056976 | 22 | 1 TCCTG TACCGAGCTGCCCCGAC        | miRNA | miR-486-5p |
| t0057022 | 22 | 1 TCCTG TACTGAGCTGGCCAGAG        | miRNA | miR-486-5p |
| t0057106 | 22 | 1 TCCTG TCCTGAGCTGCCCCGAA        | miRNA | miR-486-5p |
| t0057187 | 28 | 1 TCCTG TACTGAGCTGCCCCAGACGGCT   | miRNA | miR-486-5p |
| t0057516 | 21 | 1 TCCGG TACTGGGCTGCCCCGA         | miRNA | miR-486-5p |

|          |    |                                  |       |            |
|----------|----|----------------------------------|-------|------------|
| t0057531 | 24 | 1 ACCTG TACTGAGCTGCCCCGAGAA      | miRNA | miR-486-5p |
| t0057680 | 23 | 1 TCCTG TACAGAGCTGCCCCGAGT       | miRNA | miR-486-5p |
| t0057681 | 26 | 1 TCCTG TACTGAGTTGCCCCGAGCAAG    | miRNA | miR-486-5p |
| t0057824 | 24 | 1 TCCTG TACTGAGCTGCCCCGCGTA      | miRNA | miR-486-5p |
| t0057983 | 22 | 1 TCCTG TACTGAGCTGTCACGAG        | miRNA | miR-486-5p |
| t0058178 | 18 | 1 TTGTA ATGAGCTGCCCCG            | miRNA | miR-486-5p |
| t0058284 | 22 | 1 TCCTG TACTGAGCTGCTACGAG        | miRNA | miR-486-5p |
| t0058492 | 20 | 1 CTGTA CTGAGCTGCCACGAG          | miRNA | miR-486-5p |
| t0058622 | 22 | 1 TCCCG TACTTAGCTGCCCCGAG        | miRNA | miR-486-5p |
| t0058701 | 24 | 1 TCCTA TACTGAGCTGCCCCGAGAT      | miRNA | miR-486-5p |
| t0058732 | 22 | 1 TCCTG TAAAGCTGCCCCGAG          | miRNA | miR-486-5p |
| t0058893 | 22 | 1 TCCTG TACTAAGCTGCCCTGAG        | miRNA | miR-486-5p |
| t0058956 | 22 | 1 TCCTG TACCGAGCTGCCCCGAA        | miRNA | miR-486-5p |
| t0058968 | 23 | 1 TCCGG TACTGAGCTGCCCCGAGA       | miRNA | miR-486-5p |
| t0059353 | 21 | 1 TCCTG TACTGTGCTGCCCCGT         | miRNA | miR-486-5p |
| t0059459 | 23 | 1 TCCTG TACTGAGCTGCCAGAGG        | miRNA | miR-486-5p |
| t0059833 | 22 | 1 TCCTG TACTGAGTTGCCCAAG         | miRNA | miR-486-5p |
| t0059904 | 24 | 1 TCCTG TACTGAGCTGCCCCGAGGG      | miRNA | miR-486-5p |
| t0060066 | 22 | 1 TCCTG TACTGAGCTGGCCCCGAT       | miRNA | miR-486-5p |
| t0060213 | 25 | 1 CCCTG TACTGAGCTGCCCCGAGAGA     | miRNA | miR-486-5p |
| t0060521 | 24 | 1 TCCTG TACTGAGCTGCCCAAGAG       | miRNA | miR-486-5p |
| t0060864 | 22 | 1 TCCTG CACTGAGCTGCCCCGAA        | miRNA | miR-486-5p |
| t0060992 | 20 | 1 TCCTG TAAAGCTGCCCCG            | miRNA | miR-486-5p |
| t0060998 | 22 | 1 TCCTG TACTAAGCTGCCCCGCG        | miRNA | miR-486-5p |
| t0061019 | 21 | 1 TACTG TACTGAGCTGCCCCGT         | miRNA | miR-486-5p |
| t0061113 | 29 | 1 TCCTG TACTGAGCTGCCCCGAGCTCGGCC | miRNA | miR-486-5p |
| t0061487 | 22 | 1 TCTG TACTGAGCTGCCCCGAGT        | miRNA | miR-486-5p |
| t0061649 | 22 | 1 TCCTG TACTTAGCTGCCCCGCG        | miRNA | miR-486-5p |
| t0061670 | 21 | 1 TCATG TACTGAGCTGCCCCGC         | miRNA | miR-486-5p |
| t0062188 | 26 | 1 TCCTG TACTGAGCTGCCACGAGGTCC    | miRNA | miR-486-5p |
| t0062295 | 21 | 1 ATCCT G TACTGAGATGCCCCG        | miRNA | miR-486-5p |
| t0062735 | 21 | 1 TCTTG TACTGAGATGCCCCGA         | miRNA | miR-486-5p |
| t0062917 | 28 | 1 TTCTG TACTGAGCTGCCCCGAGCCCGCA  | miRNA | miR-486-5p |
| t0062926 | 21 | 1 TCCTG TACTGAGCTGACTCGA         | miRNA | miR-486-5p |
| t0063031 | 21 | 1 GCCTG TACTGAGCTGCCCGCA         | miRNA | miR-486-5p |
| t0063205 | 21 | 1 TCCTC TACTGAGCGGCCCGA          | miRNA | miR-486-5p |
| t0063356 | 29 | 1 TCCTG TACTGAGCTGCCCCGAGGCGGCA  | miRNA | miR-486-5p |
| t0063357 | 22 | 1 TCCTG TAAAGCTGACCCGAG          | miRNA | miR-486-5p |
| t0063390 | 20 | 1 TCCTG TAAAGCTGCCAG             | miRNA | miR-486-5p |
| t0063429 | 20 | 1 CTGG A CTGAGCTGCCCCGAG         | miRNA | miR-486-5p |
| t0063515 | 22 | 1 TCCTG TACTGAGCTGCCACGGG        | miRNA | miR-486-5p |
| t0063531 | 24 | 1 TCCTG TACTAAGCTGCCCCGAGAT      | miRNA | miR-486-5p |
| t0063604 | 24 | 1 TCCTG TACTGAGCTGCCCCGTGAA      | miRNA | miR-486-5p |
| t0063873 | 24 | 1 TCCTG TACTGAGCTGCCCTGAGAA      | miRNA | miR-486-5p |
| t0063914 | 23 | 1 TCCTG TACTGATCTGCCCCGAGA       | miRNA | miR-486-5p |
| t0064111 | 28 | 1 TCCTG TACTGAGCTGACCCGAGACGGCA  | miRNA | miR-486-5p |
| t0064359 | 23 | 1 TCTTG TACTGAGCTGGCCCCGAGA      | miRNA | miR-486-5p |
| t0064416 | 21 | 1 TCCTG TACTGAGCTGTCCAGA         | miRNA | miR-486-5p |
| t0064873 | 22 | 1 TCCTG TACTGAGTTGCCCCGCG        | miRNA | miR-486-5p |
| t0064952 | 23 | 1 TCCTG TACTGAGCTCCCCCGCGT       | miRNA | miR-486-5p |
| t0065197 | 23 | 1 TCCTG TACTGACCTGCCCCGAGT       | miRNA | miR-486-5p |
| t0065449 | 26 | 1 TCCTG TACTGAGCTGCCACGAGCAAG    | miRNA | miR-486-5p |
| t0065466 | 28 | 1 TCCTG TACTGAGCTGCCCCGAGACTGAA  | miRNA | miR-486-5p |
| t0065574 | 21 | 1 TCTTG TACTGAGCTGCCCGA          | miRNA | miR-486-5p |
| t0065579 | 22 | 1 TCTTG TACTGAGCTGCCCCGAA        | miRNA | miR-486-5p |
| t0065658 | 20 | 1 TCCTG TACTGAGCTGCCATG          | miRNA | miR-486-5p |
| t0065757 | 24 | 1 TCCTG TACTGAGCTGTCCCAGGA       | miRNA | miR-486-5p |
| t0065847 | 24 | 1 TCCTG TACTGAGCTGCCCCGAAAA      | miRNA | miR-486-5p |

|          |    |                                  |       |            |
|----------|----|----------------------------------|-------|------------|
| t0065857 | 27 | 1 TTCTG TACTGAGCTACCCCGAGACGGC   | miRNA | miR-486-5p |
| t0066198 | 27 | 1 TCCTG TACTGAGCTGCCCCGAGCTGAT   | miRNA | miR-486-5p |
| t0066298 | 23 | 1 TCATG TACTGAGCTGCCCCGAGG       | miRNA | miR-486-5p |
| t0066380 | 24 | 1 TCCTG TACTGAGCTGCCCCGAGCG      | miRNA | miR-486-5p |
| t0066445 | 27 | 1 TCCTG TACTGAGCTGCCCCGACGCTAA   | miRNA | miR-486-5p |
| t0066631 | 20 | 1 TCCTG TACTGAGCTGCCCCCT         | miRNA | miR-486-5p |
| t0066657 | 21 | 1 ACCTG TACTGAGCTCCCCCGA         | miRNA | miR-486-5p |
| t0067042 | 28 | 1 TCCTG TACTGAGCTGCCCCGAGCGGAAT  | miRNA | miR-486-5p |
| t0067273 | 21 | 1 TTCTG TACTGAGCTGCCCGA          | miRNA | miR-486-5p |
| t0067359 | 24 | 1 TCCTG TACTGAGCTGACCCGAGAA      | miRNA | miR-486-5p |
| t0067516 | 23 | 1 TCCTG TACTGAGCTGCCTCGAGC       | miRNA | miR-486-5p |
| t0067533 | 20 | 1 TCCTG TACTGAGCCGCCCG           | miRNA | miR-486-5p |
| t0067881 | 28 | 1 TCATG TACTGAGCTGCCCCGAGACTGCA  | miRNA | miR-486-5p |
| t0068010 | 23 | 1 TCTTG TACTGCGCTGCCCCGAGA       | miRNA | miR-486-5p |
| t0068069 | 22 | 1 TCCTG TACTGAGATGCCACGAG        | miRNA | miR-486-5p |
| t0068324 | 28 | 1 TACTG TACTGAGCTGCCCCGAGACGGAA  | miRNA | miR-486-5p |
| t0068578 | 23 | 1 TCCTG TAA TGAGCTGCCCCGAAA      | miRNA | miR-486-5p |
| t0068639 | 23 | 1 TCTTG TACTGAGCTGCCCCCAGA       | miRNA | miR-486-5p |
| t0068678 | 22 | 1 ACCTG TACTGAGCTGCCCCGAT        | miRNA | miR-486-5p |
| t0068812 | 28 | 1 TCCTG TACTGAGCTGCCCCGAGAAGGCA  | miRNA | miR-486-5p |
| t0068848 | 29 | 1 TCCTG TACTGAGCTGCCCCGAGACGGCC  | miRNA | miR-486-5p |
| t0068887 | 22 | 1 TCCTG TACTGAGCTGTACCGAG        | miRNA | miR-486-5p |
| t0068917 | 29 | 1 TCCTG TACCGAGCTGCCCCGAGATGAGCC | miRNA | miR-486-5p |
| t0068985 | 20 | 1 TACTG TACTGAGCTGCCCCG          | miRNA | miR-486-5p |
| t0068989 | 23 | 1 TCCTG TACTGAGCTGTCCCGAGT       | miRNA | miR-486-5p |
| t0069025 | 28 | 1 TCCTG TACTGACCTGCCCCGAGACGGCA  | miRNA | miR-486-5p |
| t0069121 | 23 | 1 TCCTG TAGTGAGCTGCCCCGAGA       | miRNA | miR-486-5p |
| t0069222 | 24 | 1 TCCTG TACTGAGCTGCCTCGAGAA      | miRNA | miR-486-5p |
| t0069501 | 22 | 1 TCATG TACTGAGCTGCCCCGCG        | miRNA | miR-486-5p |
| t0069792 | 23 | 1 TCCTG TACTGAGCTGCCCTGAAA       | miRNA | miR-486-5p |
| t0069996 | 21 | 1 TCTTG TCCTGAGCTGCCCCGA         | miRNA | miR-486-5p |
| t0070029 | 22 | 1 TTCTG GACTGAGCTGCCCCGAG        | miRNA | miR-486-5p |
| t0070248 | 20 | 1 TTG TACTGAGCTGCACCGAG          | miRNA | miR-486-5p |
| t0070275 | 23 | 1 TCCTG TACTAAGCTGCCCCGCGT       | miRNA | miR-486-5p |
| t0070288 | 21 | 1 TTCTG CACTGAGCTGCCCCGA         | miRNA | miR-486-5p |
| t0070343 | 28 | 1 TCTTG TACTGAGCTGCCCCGAGACGGCA  | miRNA | miR-486-5p |
| t0070374 | 21 | 1 TCCTG TACTGAGCGGCCTCGA         | miRNA | miR-486-5p |
| t0070450 | 21 | 1 TCCTG TAA TGAGCTGCACCGA        | miRNA | miR-486-5p |
| t0070468 | 28 | 1 TCCTG TACTGAGCTGCCCCGAGGCGGTA  | miRNA | miR-486-5p |
| t0070471 | 22 | 1 TCCTG TACTGAGCTGTCCAGAG        | miRNA | miR-486-5p |
| t0070848 | 19 | 1 TTG TACTGAGCTGCCCTA            | miRNA | miR-486-5p |
| t0070880 | 26 | 1 TCCTG TACTGAGTTGCCCCGCGAAGA    | miRNA | miR-486-5p |
| t0071148 | 23 | 1 TCCTC TACTGAGCTGCCCCGGGT       | miRNA | miR-486-5p |
| t0071532 | 23 | 1 TCCTG GACTGAGCTGCCCCGAGT       | miRNA | miR-486-5p |
| t0071548 | 19 | 1 TCCTG TACTGAGCTGCGCG           | miRNA | miR-486-5p |
| t0071613 | 22 | 1 TCCTG TACTGAGCTCCCCCGCG        | miRNA | miR-486-5p |
| t0071689 | 22 | 1 TCCTG TACTGAGCTGCACCGAA        | miRNA | miR-486-5p |
| t0071808 | 26 | 1 TCCTG TACTGAGCTGCCCAAGGTCC     | miRNA | miR-486-5p |
| t0071836 | 19 | 1 TG TACTGAGCTGCCCAAG            | miRNA | miR-486-5p |
| t0071860 | 28 | 1 TCCTG TACTGAGCTGCCCCGCGATGGCG  | miRNA | miR-486-5p |
| t0072068 | 20 | 1 CTG TACTGAGCTACCCCGAG          | miRNA | miR-486-5p |
| t0072142 | 28 | 1 TCCTG TACTGAGCTGCCCAAGACTGCA   | miRNA | miR-486-5p |
| t0072266 | 22 | 1 TCTT A TACTGAGCTGCCCCGAG       | miRNA | miR-486-5p |
| t0072342 | 29 | 1 TCCTG TACTGAGCTGCCCCGAGACGGCA  | miRNA | miR-486-5p |
| t0072431 | 22 | 1 TCTTG TACTGAGATGCCCCGAG        | miRNA | miR-486-5p |
| t0072636 | 21 | 1 TCCTG TACTGCGCTGCTCCGA         | miRNA | miR-486-5p |
| t0072906 | 22 | 1 ATCCTG TACTGAGCGGCCACGA        | miRNA | miR-486-5p |
| t0072940 | 28 | 1 TCCTG TACTGCGCTGCCCCGAGCCCGCA  | miRNA | miR-486-5p |

|          |    |           |           |                |       |            |
|----------|----|-----------|-----------|----------------|-------|------------|
| t0072964 | 26 | 1 TCCTGTA | CTGAGCTG  | CCCCGACGGGC    | miRNA | miR-486-5p |
| t0072981 | 21 | 1 TCTTGTA | CTAAGCTG  | CCCCGA         | miRNA | miR-486-5p |
| t0073001 | 21 | 1 TTCTGGA | CTGAGCTG  | CCCCGA         | miRNA | miR-486-5p |
| t0073043 | 22 | 1 TCCTGTA | TATGAGCT  | GGCCCCGAG      | miRNA | miR-486-5p |
| t0073088 | 28 | 1 TCCTGTA | CTCAGCTG  | CCCCGAGACGGTA  | miRNA | miR-486-5p |
| t0073284 | 23 | 1 TCCAGTA | CTGAGCTG  | CCCCGAGA       | miRNA | miR-486-5p |
| t0073336 | 23 | 1 TCTTGTA | AATGAGCT  | GCCCCGAGA      | miRNA | miR-486-5p |
| t0073443 | 23 | 1 TCCTGTA | CTGAGCTG  | CCCCGATT       | miRNA | miR-486-5p |
| t0073761 | 28 | 1 TCCTGTA | CTGAGCTG  | CCCCGAGCTACTC  | miRNA | miR-486-5p |
| t0073844 | 28 | 1 TCCTGTA | CTGAGCTG  | CTTCGAGACGGCA  | miRNA | miR-486-5p |
| t0073849 | 21 | 1 TCCTGTA | CTGAGATG  | CCTGA          | miRNA | miR-486-5p |
| t0074043 | 18 | 1 TGTA    | CTGAGCTG  | CCCCGC         | miRNA | miR-486-5p |
| t0074057 | 21 | 1 CTGTA   | CTGAGCTG  | CACCGAGA       | miRNA | miR-486-5p |
| t0074124 | 22 | 1 TCCTGTA | CAGAGCTG  | CCCCGAT        | miRNA | miR-486-5p |
| t0074243 | 21 | 1 TTGTA   | CTGAGCCG  | CCCCGAGA       | miRNA | miR-486-5p |
| t0074279 | 24 | 1 TCCTGTA | CTGAGCTG  | CCCCGATGG      | miRNA | miR-486-5p |
| t0074340 | 21 | 1 TCCTGTA | CTGAGCTG  | CACAGA         | miRNA | miR-486-5p |
| t0074476 | 21 | 1 TCCTGTA | CTGAGCTG  | CCTGC          | miRNA | miR-486-5p |
| t0074529 | 28 | 1 TCCTGTA | CTGAGCTG  | CCCCGACGCTCGG  | miRNA | miR-486-5p |
| t0074784 | 22 | 1 TCCTGGA | CTGAGCTG  | CCCCGAA        | miRNA | miR-486-5p |
| t0074867 | 24 | 1 TCCTGTA | CTGATCTG  | CCCCGAGAT      | miRNA | miR-486-5p |
| t0075596 | 22 | 1 TCCTGTA | AATGAGCCG | CCCCGAG        | miRNA | miR-486-5p |
| t0075644 | 21 | 1 TCCTGTA | CTGAGCGG  | CACGA          | miRNA | miR-486-5p |
| t0075649 | 23 | 1 TCCTGTA | CTGAGCTG  | CACCGAGG       | miRNA | miR-486-5p |
| t0075934 | 23 | 1 TCCTGTA | CTGAGCTG  | CCCCAAGT       | miRNA | miR-486-5p |
| t0076010 | 25 | 1 TCCTGTA | AATGAGCTG | CCCCGAGATA     | miRNA | miR-486-5p |
| t0076045 | 26 | 1 TCCCGTA | CTGAGCTG  | CCCCGAGCAAG    | miRNA | miR-486-5p |
| t0076172 | 22 | 1 TCTTGCA | CTGAGCTG  | CCCCGAG        | miRNA | miR-486-5p |
| t0076181 | 23 | 1 TCCTGTA | CTGAGCTG  | CCCCGAGA       | miRNA | miR-486-5p |
| t0076351 | 22 | 1 TACTGTA | CTGAGCTG  | CCTCGAG        | miRNA | miR-486-5p |
| t0076394 | 22 | 1 TCCTGTA | CTGAGCTG  | CCTGAA         | miRNA | miR-486-5p |
| t0076497 | 22 | 1 TCCTGTC | CTGAGCTG  | ACCCGAG        | miRNA | miR-486-5p |
| t0076741 | 23 | 1 TCCTGTA | CTGAGCTG  | CACAGAGT       | miRNA | miR-486-5p |
| t0076952 | 23 | 1 TCTTGTA | CTGAGCTG  | CGCCGAGT       | miRNA | miR-486-5p |
| t0077025 | 18 | 1 TCCTGTA | CTGAGCTG  | ACC            | miRNA | miR-486-5p |
| t0077098 | 23 | 1 TCCTGTA | CTGAGCTC  | CCCCGTGT       | miRNA | miR-486-5p |
| t0077135 | 22 | 1 TCCTGTA | CTGGGCTG  | TCCCGAG        | miRNA | miR-486-5p |
| t0077203 | 22 | 1 TCCTGTA | CTGAGTTG  | TCCCGAG        | miRNA | miR-486-5p |
| t0077333 | 25 | 1 TCCTGTA | AATGAGCTG | CCCCGAGGAA     | miRNA | miR-486-5p |
| t0077441 | 23 | 1 TCCTGTA | TATGAGCTG | CCCCGCGA       | miRNA | miR-486-5p |
| t0077518 | 21 | 1 TCCTGTA | CTGAGCTG  | CGGCGA         | miRNA | miR-486-5p |
| t0077586 | 20 | 1 CTGTA   | CTGAGCTG  | CCCCGCG        | miRNA | miR-486-5p |
| t0077623 | 23 | 1 TCCTGTA | CTGAGCTG  | GGACCGAGA      | miRNA | miR-486-5p |
| t0077898 | 23 | 1 TCCTGTA | CTGTGCTG  | CCCCGAGA       | miRNA | miR-486-5p |
| t0077918 | 28 | 1 TCCTGTA | CTAAGCTG  | CCCCGAGACGGCA  | miRNA | miR-486-5p |
| t0077925 | 21 | 1 TCCTGTA | CAGGAGCT  | GTCCCGA        | miRNA | miR-486-5p |
| t0077944 | 22 | 1 ACCTGTA | CTGAGCTG  | CCTGAG         | miRNA | miR-486-5p |
| t0078218 | 25 | 1 TCCTGTG | CTGAGCTG  | CCCCGAGTCC     | miRNA | miR-486-5p |
| t0078450 | 23 | 1 ACCTGTA | CTGAGCTG  | CCCCGAAA       | miRNA | miR-486-5p |
| t0078697 | 26 | 1 TCCTGTA | CTGAGATG  | CCCCGAGCGCG    | miRNA | miR-486-5p |
| t0078741 | 24 | 1 TCCAGTA | CTGAGCTG  | CCCCGAGAT      | miRNA | miR-486-5p |
| t0078953 | 23 | 1 TCCTGTG | CTGAGCTG  | CCCCGAGC       | miRNA | miR-486-5p |
| t0079516 | 22 | 1 TCCTGTA | CTGAGCTG  | ACCTGAG        | miRNA | miR-486-5p |
| t0079755 | 29 | 1 TCCTGTA | CTGAGCTG  | CCCCGCGATGAGCC | miRNA | miR-486-5p |
| t0080053 | 26 | 1 TCCTGTA | CTGAGCTG  | CCAGAGACGG     | miRNA | miR-486-5p |
| t0080218 | 26 | 1 TCCTGTA | CTGAGCTG  | CCCCGAGGGCC    | miRNA | miR-486-5p |
| t0080231 | 21 | 1 TCTTGTA | CTGCGCTG  | CCCCGA         | miRNA | miR-486-5p |
| t0080427 | 23 | 1 TCCTGTA | CTGAGATG  | CCCCGAGT       | miRNA | miR-486-5p |

|          |    |                                |       |            |
|----------|----|--------------------------------|-------|------------|
| t0080740 | 22 | 1 TCCTGTACTGAGCTCCCCCGAC       | miRNA | miR-486-5p |
| t0080747 | 21 | 1 TCCTGTACTGAACTGGCCCGA        | miRNA | miR-486-5p |
| t0080795 | 26 | 1 TCCTGTACTGAGCTGCCAGAGGTCC    | miRNA | miR-486-5p |
| t0080855 | 21 | 1 TCCTGTACTGAGCTGAACCGA        | miRNA | miR-486-5p |
| t0081414 | 23 | 1 TCCTATACTGAGCTGTCCCGAGA      | miRNA | miR-486-5p |
| t0081502 | 20 | 1 CTGTACTGAGCTGCCCCGAT         | miRNA | miR-486-5p |
| t0081755 | 21 | 1 TCCTGTACCGAGCTGCCTCGA        | miRNA | miR-486-5p |
| t0081944 | 23 | 1 TCCTGTACTGAGCTGACCCGAGG      | miRNA | miR-486-5p |
| t0081973 | 22 | 1 TCATGTACTGAGCTGCCCCGAT       | miRNA | miR-486-5p |
| t0082092 | 23 | 1 TCTTGTACTGAGCTGCCCCGCGA      | miRNA | miR-486-5p |
| t0082298 | 21 | 1 TCCTGTACTGAGCTGCCTCGC        | miRNA | miR-486-5p |
| t0082513 | 28 | 1 TCCTGTACTGAGCTGCCCCGAGACGGAA | miRNA | miR-486-5p |
| t0082570 | 22 | 1 TACTGTACTGAGCTGCCCCGAT       | miRNA | miR-486-5p |
| t0082602 | 23 | 1 TCCTCTACTGAGCTGCCCCGAGA      | miRNA | miR-486-5p |
| t0082695 | 19 | 1 TCCTGTACTGAACTGCCCC          | miRNA | miR-486-5p |
| t0082919 | 22 | 1 TCATGTACTGAGCTGACCCGAG       | miRNA | miR-486-5p |
| t0082929 | 22 | 1 TCCTGTACTGAGCTGCCCAAT        | miRNA | miR-486-5p |
| t0082991 | 22 | 1 TCTTGTACTGAGCTGCCCCGAT       | miRNA | miR-486-5p |
| t0083112 | 22 | 1 TCCTGTACTGAGCCGCCCCGCG       | miRNA | miR-486-5p |
| t0083260 | 20 | 1 TCCTGTACTGAGTTGCCCCG         | miRNA | miR-486-5p |
| t0083320 | 24 | 1 TCCTGTACTGAGCTGTCCCGAGTT     | miRNA | miR-486-5p |
| t0083326 | 23 | 1 TCCTGTACTCAGCTGCCCCGAGT      | miRNA | miR-486-5p |
| t0083841 | 21 | 1 TCGTGTACTGAGCTGCCTCGA        | miRNA | miR-486-5p |
| t0083893 | 25 | 1 TCCTGTACTGAGATGCCCCGACGGT    | miRNA | miR-486-5p |
| t0084085 | 19 | 1 TCCTGTACTGAGCTGCCCG          | miRNA | miR-486-5p |
| t0084189 | 22 | 1 TCCTGTACTGAGCGGTCCCGAG       | miRNA | miR-486-5p |
| t0084232 | 28 | 1 TCCTGTACTGAGCTGCCCCGAGACCGCC | miRNA | miR-486-5p |
| t0084493 | 22 | 1 TTCTGTACTGAGCTGCCCCAG        | miRNA | miR-486-5p |
| t0084772 | 21 | 1 TCCTGTACTGAGCTGCAACGA        | miRNA | miR-486-5p |
| t0084838 | 21 | 1 TCATGTAATGAGCTGCCCCGA        | miRNA | miR-486-5p |
| t0085238 | 26 | 1 TCCTGTACTGAGCTGCCCCGACATGG   | miRNA | miR-486-5p |
| t0085389 | 20 | 1 TACTGTACTGAGCTGACCCG         | miRNA | miR-486-5p |
| t0085492 | 23 | 1 TCCTGTACTGAGATGCACCGAGA      | miRNA | miR-486-5p |
| t0085552 | 23 | 1 TACTGTACTGAGCTGCACCGAGA      | miRNA | miR-486-5p |
| t0085941 | 26 | 1 TCCTATACTGAGCTGCCCCGAGATGG   | miRNA | miR-486-5p |
| t0085993 | 22 | 1 TTCTGTACTGAGCTCCCCGAG        | miRNA | miR-486-5p |
| t0086360 | 22 | 1 TCCTGTACTGGGCTGCCCCGAA       | miRNA | miR-486-5p |
| t0086442 | 24 | 1 TCCTGTACTGAGCTGCCCCGCCGT     | miRNA | miR-486-5p |
| t0086650 | 25 | 1 TCCTGTACTGAGCTGCCCCACGGT     | miRNA | miR-486-5p |
| t0086723 | 24 | 1 TCCTGTACTGAGCTGCCCCGGGAA     | miRNA | miR-486-5p |
| t0086779 | 22 | 1 TCTTGTAAATGAGCTGCCCCGAG      | miRNA | miR-486-5p |
| t0086896 | 19 | 1 TTGTACTGAGCTGCCACGA          | miRNA | miR-486-5p |
| t0087026 | 21 | 1 TCCTGTGCTGAGCAGCCCGA         | miRNA | miR-486-5p |
| t0087037 | 19 | 1 TTGTACTGAGCTGCCCCGG          | miRNA | miR-486-5p |
| t0087510 | 28 | 1 TCCTGTACTGAGCTGCCCCGAGCGGCTC | miRNA | miR-486-5p |
| t0087912 | 23 | 1 CTGTACTGAGCTGCCCCGAGAAG      | miRNA | miR-486-5p |
| t0088004 | 27 | 1 TCTGTACTGAGCTGCCCCGAGACGGCA  | miRNA | miR-486-5p |
| t0088359 | 21 | 1 TCCTGTACTGAGCTGTACGA         | miRNA | miR-486-5p |
| t0088436 | 19 | 1 CTGTACTGAGCTGCCCCGC          | miRNA | miR-486-5p |
| t0088447 | 22 | 1 TCCTGTACTGAGCTGCCTCGAA       | miRNA | miR-486-5p |
| t0088448 | 22 | 1 TCCTGTAATGAGCTGCCCCGAA       | miRNA | miR-486-5p |
| t0088692 | 22 | 1 TCCTGTTCTGCGCTGCCCCGAG       | miRNA | miR-486-5p |
| t0088817 | 22 | 1 TCTTGTACTAAGCTGCCCCGAG       | miRNA | miR-486-5p |
| t0088847 | 22 | 1 TTCTGTACTGAGTTGCCCCGAG       | miRNA | miR-486-5p |
| t0088902 | 23 | 1 TCCTGTACTGCGATGCCCCGAGA      | miRNA | miR-486-5p |
| t0089075 | 22 | 1 TTCTATACTGAGCTGCCCCGAG       | miRNA | miR-486-5p |
| t0089190 | 21 | 1 TCCTGTACTGAGCTGCTCAGA        | miRNA | miR-486-5p |
| t0089247 | 21 | 1 TCCTGTACTGCGCTGCCCAGA        | miRNA | miR-486-5p |



|          |    |                              |       |             |
|----------|----|------------------------------|-------|-------------|
| t0089385 | 21 | 1 TCCTG TACTG AACTGCCCTGA    | miRNA | miR-486-5p  |
| t0089423 | 23 | 1 ACCTG TACTG AGCTGCCCCGAGT  | miRNA | miR-486-5p  |
| t0089431 | 20 | 1 TCATG TACTG AGCTGCCCGAG    | miRNA | miR-486-5p  |
| t0089615 | 22 | 1 TCCTG TACTG AGGTGCACCGAG   | miRNA | miR-486-5p  |
| t0089641 | 22 | 1 TCCTG TACTG AGCTCCACCGAG   | miRNA | miR-486-5p  |
| t0089912 | 23 | 1 TCCTG TCCTG AGCTGCCAGAGA   | miRNA | miR-486-5p  |
| t0089940 | 22 | 1 TCCTG TTCTG AGCTGCCCCGAT   | miRNA | miR-486-5p  |
| t0090292 | 21 | 1 TCTTG AACTG AGCTGCCCCGA    | miRNA | miR-486-5p  |
| t0090313 | 22 | 1 TCCTG TACTG AGCTGCTCCCGAG  | miRNA | miR-486-5p  |
| t0090681 | 21 | 1 TCCTG TAATG AGCTGCCCCCA    | miRNA | miR-486-5p  |
| t0090710 | 23 | 1 TCTTG TACTG AGCTGACCCGAGA  | miRNA | miR-486-5p  |
| t0090825 | 21 | 1 CGGGG CAGCTCAGTACGGGAT     | miRNA | miR-486-3p  |
| t0090893 | 21 | 1 CGGGG CAGCTCAGTACCGGAT     | miRNA | miR-486-3p  |
| t0091195 | 21 | 1 CGGGG CAGCTCACTACAGGAT     | miRNA | miR-486-3p  |
| t0091249 | 21 | 1 CGGGG CAGCTAAGTACAGGAT     | miRNA | miR-486-3p  |
| t0091274 | 21 | 1 GGGGG CAGCTCAGTACAGGAT     | miRNA | miR-486-3p  |
| t0091310 | 20 | 1 GTAGG ATTGTGTCGGCCGAT      | miRNA | miR-4860    |
| t0091651 | 23 | 1 TAGG ATTGTGTCGGCAGATCTTT   | miRNA | miR-4860    |
| t0091749 | 20 | 1 AGG ATTGTGTCGGGAGATCA      | miRNA | miR-4860    |
| t0091818 | 22 | 1 AGATG TAGGATTGTGTCGGCAT    | miRNA | miR-4860    |
| t0091929 | 25 | 1 ATGTAG GATTGTGTCGGGAGTTTTT | miRNA | miR-4860    |
| t0092011 | 23 | 1 GTAGG ATTGTGTCGGTAGATATT   | miRNA | miR-4860    |
| t0092336 | 21 | 1 TAGG ATTGTGTCGGTAGGTCA     | miRNA | miR-4860    |
| t0092549 | 21 | 1 TAGA ATTGTGTCGGCAGATCT     | miRNA | miR-4860    |
| t0068361 | 25 | 1 GGATT GTGTCGGCAGATCAGATTTT | miRNA | miR-4860    |
| t0079342 | 22 | 1 TAAAT GTAGAATTGTGTCGGTC    | miRNA | miR-4860    |
| t0085635 | 22 | 1 TAGA ATTGTGTCGGCAGATCTC    | miRNA | miR-4860    |
| t0086681 | 23 | 1 TAGA ATTGTGTCGGCAGATCATT   | miRNA | miR-4860    |
| t0088997 | 23 | 1 TAGAT GTAGGATTGTGTCGGTTC   | miRNA | miR-4860    |
| t0053584 | 21 | 1 TGTAG GATTGTGTCGGTAGAT     | miRNA | miR-4860    |
| t0054380 | 23 | 1 GTAGA ATTGTGTCGGCAGATTAT   | miRNA | miR-4860    |
| t0056057 | 24 | 1 GGATT GTGTCGGCAGATCAGTTTC  | miRNA | miR-4860    |
| t0058808 | 23 | 1 TAGAT GTAGGATTGTGTCGGTAT   | miRNA | miR-4860    |
| t0060570 | 22 | 1 TGTAG GATTGTGTCGGTAGATT    | miRNA | miR-4860    |
| t0061214 | 21 | 1 TAAAT GTAGAATTGTGTCGGT     | miRNA | miR-4860    |
| t0063399 | 20 | 1 TAGAT GTAGGATTGTGTCGG      | miRNA | miR-4860    |
| t0064420 | 25 | 1 AGATG TAGGATTGTGTCGGTTTATT | miRNA | miR-4860    |
| t0069221 | 23 | 1 TGTAG GATTGTGTCGGGAGATTT   | miRNA | miR-4860    |
| t0069795 | 24 | 1 TGTAG GATTGTGTCGGTAGACTTT  | miRNA | miR-4860    |
| t0070654 | 23 | 1 AGATG TAGGATTGTGTCGGTTTA   | miRNA | miR-4860    |
| t0071109 | 21 | 1 TCAGG CT CAGTCCCCTCCC GC   | miRNA | miR-484     |
| t0075421 | 22 | 1 TCAGG CT CAGTCCCCTCCC GTT  | miRNA | miR-484     |
| t0082354 | 20 | 1 AGGAC AGGAAAGAGAAGGAG      | miRNA | miR-483     |
| t0083537 | 22 | 1 AGAGT CGGCGACGACGCCAGTT    | miRNA | miR-4785    |
| t0084555 | 22 | 1 AGAGT CGGCGACGCCGCCCGTT    | miRNA | miR-4785    |
| t0084897 | 21 | 1 TCGGG CGGAGGTGGTTGCGTG     | miRNA | miR-4750    |
| t0085361 | 20 | 1 CTCGG GCGGAGGGGGTTGAG      | miRNA | miR-4750    |
| t0088468 | 21 | 1 ACAGG CAAAGGGATATTTACA     | miRNA | miR-4742-5p |
| t0089956 | 25 | 1 TGTAG AGCAGGGCGCAGGAAGCTGA | miRNA | miR-4732-5p |
| t0090629 | 22 | 1 AGCTG TAGAGCAGGGAGCAGGG    | miRNA | miR-4732-5p |
| t0090700 | 21 | 1 TGTAG AGCAGGGAGCATGAAG     | miRNA | miR-4732-5p |
| t0091806 | 23 | 1 TGTAG AGCAGGGAGCAGGAGGCT   | miRNA | miR-4732-5p |
| t0092511 | 24 | 1 TGTAG AGCAGGCAGCAGGAAGCTG  | miRNA | miR-4732-5p |
| t0074649 | 24 | 1 TGTAG AGCAGGGAGAAGGAAGCTG  | miRNA | miR-4732-5p |
| t0078880 | 23 | 1 TGCAG AGCAGGGAGTAGGAAGCT   | miRNA | miR-4732-5p |
| t0081966 | 22 | 1 TGTAG AGCAGGGCGCAGGAAGC    | miRNA | miR-4732-5p |
| t0052806 | 24 | 1 TGTAG AGCAGGGAGCAGGAAGATG  | miRNA | miR-4732-5p |
| t0055226 | 23 | 1 TGTAG AGCAGGGAGCAGGAAGGA   | miRNA | miR-4732-5p |

|          |    |                             |       |             |
|----------|----|-----------------------------|-------|-------------|
| t0069505 | 23 | 1 TGTAAGCAGGGAGCAGGAAGCA    | miRNA | miR-4732-5p |
| t0082899 | 23 | 1 TGTAGATCAGGGAGCAGGAAGCT   | miRNA | miR-4732-5p |
| t0086101 | 23 | 1 TGTAGAGCAGGGAGCAGGGAGCA   | miRNA | miR-4732-5p |
| t0040924 | 23 | 1 TGTAGAGCAGGAAGTAGGAAGCT   | miRNA | miR-4732-5p |
| t0041249 | 23 | 1 TGTAGAGCAGGGAGCAGCAAGCT   | miRNA | miR-4732-5p |
| t0041608 | 22 | 1 TGTAGAGCAGGGAGCAGGAAAC    | miRNA | miR-4732-5p |
| t0043065 | 23 | 1 TGTAGAGCAGGGCGTAGGAAGCT   | miRNA | miR-4732-5p |
| t0043245 | 19 | 1 CGTAGAGCAGGGAGCAGGA       | miRNA | miR-4732-5p |
| t0043908 | 21 | 1 TGTAGAGCAGTGAGCAGGAAG     | miRNA | miR-4732-5p |
| t0044470 | 19 | 1 TGTAGAGCAGGGAGAAGGA       | miRNA | miR-4732-5p |
| t0044507 | 20 | 1 TGTAGAGCGGGGAGCAGGAA      | miRNA | miR-4732-5p |
| t0045547 | 19 | 1 TGTAGAGCAGGGCGCAGGA       | miRNA | miR-4732-5p |
| t0046252 | 20 | 1 TGTAGAGCAGGGCGCAGGAA      | miRNA | miR-4732-5p |
| t0046255 | 23 | 1 TGTAGAGCCGGGAGCAGGAAGCA   | miRNA | miR-4732-5p |
| t0046258 | 23 | 1 TGTAGAGCACGGAGCAGGAAGCT   | miRNA | miR-4732-5p |
| t0046374 | 22 | 1 TGTAGAGCAGGGAGCAGGCAGC    | miRNA | miR-4732-5p |
| t0048789 | 23 | 1 TGTAGAGCAGGGAACAGGAAGCT   | miRNA | miR-4732-5p |
| t0049894 | 25 | 1 TATAGAGCAGGGAGCAGGAAGCTGA | miRNA | miR-4732-5p |
| t0050024 | 23 | 1 TGTAGAGCAGGGAGCAGGAAGCT   | miRNA | miR-4732-5p |
| t0050487 | 23 | 1 TGTAGAGTAGGGAGCAGGAAGTT   | miRNA | miR-4732-5p |
| t0051079 | 22 | 1 CGTAGAGCAGGGAGCAGGAAGC    | miRNA | miR-4732-5p |
| t0051137 | 24 | 1 TGTAGAGCAGGGAGCAGGAAGCTG  | miRNA | miR-4732-5p |
| t0052015 | 24 | 1 TGTAGAGCAGGGGAGCAGGAAGCTG | miRNA | miR-4732-5p |
| t0052919 | 19 | 1 TGTAAGCAGGGAGCAGGA        | miRNA | miR-4732-5p |
| t0052937 | 23 | 1 TGTAGAGCAGGGATCAGGAAGCT   | miRNA | miR-4732-5p |
| t0053096 | 21 | 1 TGTAGAGCAGGGAGCAGGAAT     | miRNA | miR-4732-5p |
| t0053666 | 25 | 1 CGTAGAGCAGGGAGCAGGAAGCTGT | miRNA | miR-4732-5p |
| t0054002 | 25 | 1 TGTAGAGCAGGGAGCAGGAGGCTGA | miRNA | miR-4732-5p |
| t0055016 | 22 | 1 TGTAGAGCAGGGAGCAGCAAGC    | miRNA | miR-4732-5p |
| t0056222 | 23 | 1 TGTAGAGTAGGGAGCAGGAAGCT   | miRNA | miR-4732-5p |
| t0057991 | 22 | 1 AGCTGCAGAGCAGGGAGCAGGA    | miRNA | miR-4732-5p |
| t0059377 | 21 | 1 TGTAGAGCAGGGAGCAGGCAG     | miRNA | miR-4732-5p |
| t0060526 | 23 | 1 TGTAGAGCAGGGAGCATGAAGCT   | miRNA | miR-4732-5p |
| t0060817 | 23 | 1 TGTAGAGCAGGGAGTAGGAATCT   | miRNA | miR-4732-5p |
| t0060949 | 22 | 1 TGTAGAGAAGGGAGCAGGAAGC    | miRNA | miR-4732-5p |
| t0060976 | 23 | 1 TGTAGAGCAGGGAGCAGGAAGCA   | miRNA | miR-4732-5p |
| t0061948 | 23 | 1 TATAGAGCAGGGAGCAGGAAGCA   | miRNA | miR-4732-5p |
| t0063738 | 25 | 1 TGTAGAGCAGGGAGCAGGAAGATGT | miRNA | miR-4732-5p |
| t0064181 | 23 | 1 TGTAGAGCAGGGAGCAGGAATCA   | miRNA | miR-4732-5p |
| t0065608 | 23 | 1 TGTAGAGCAGGGAGCAGGTAGCT   | miRNA | miR-4732-5p |
| t0068553 | 21 | 1 TGTAGGGCAGGGAGCAGGAAG     | miRNA | miR-4732-5p |
| t0069449 | 21 | 1 TGTAGAGCAGAGAGCAGGAAG     | miRNA | miR-4732-5p |
| t0070013 | 21 | 1 TGTAGAGCATGGAGCAGGAAG     | miRNA | miR-4732-5p |
| t0071779 | 20 | 1 TGTAGAGCCGGGAGCAGGAA      | miRNA | miR-4732-5p |
| t0074080 | 23 | 1 TGTAGAGCAGGAAGCAGGAAGCT   | miRNA | miR-4732-5p |
| t0074333 | 21 | 1 TGTAGAGCAGGGAACAGGAAG     | miRNA | miR-4732-5p |
| t0076695 | 24 | 1 TGTAGAGCAGGGAGCAGGAAGCCG  | miRNA | miR-4732-5p |
| t0076791 | 24 | 1 ATGTAGAGCAGGGAGCAAGAAGCA  | miRNA | miR-4732-5p |
| t0077014 | 22 | 1 TGTAGAGCAGGGAGCAAGAAGC    | miRNA | miR-4732-5p |
| t0077384 | 22 | 1 TGCAGAGCAGGGAGCAGGAAGC    | miRNA | miR-4732-5p |
| t0078567 | 19 | 1 TGTAGGGCAGGGAGCAGGA       | miRNA | miR-4732-5p |
| t0079723 | 21 | 1 TGTAGAGAAGGGAGCAGGAGG     | miRNA | miR-4732-5p |
| t0080028 | 22 | 1 TGTAGAGCAGGGAGCAGGAAGA    | miRNA | miR-4732-5p |
| t0080217 | 23 | 1 TGTAGAGCTGGGAGCAGGAAGCT   | miRNA | miR-4732-5p |
| t0080375 | 23 | 1 TGTAGAGCAGGGAGAAGGAAGCA   | miRNA | miR-4732-5p |
| t0082166 | 24 | 1 TGTAGAGCAGGGAGCAGGAAGCAG  | miRNA | miR-4732-5p |
| t0082534 | 23 | 1 TGTAGAGCAGGGAGCAGGAACCT   | miRNA | miR-4732-5p |
| t0082668 | 24 | 1 TGTAGAGCAGGGAGCAGGCAGCTG  | miRNA | miR-4732-5p |

|          |    |                                |       |              |
|----------|----|--------------------------------|-------|--------------|
| t0086633 | 21 | 1 TGTAGAGCAGGGAGCCGGAAG        | miRNA | miR-4732-5p  |
| t0086655 | 21 | 1 TATAGAGCAGGGAGCAGGAAG        | miRNA | miR-4732-5p  |
| t0087166 | 20 | 1 TCTCCCTTTCTGCCCTGGCT         | miRNA | miR-4685-3p  |
| t0088319 | 20 | 1 TCTCCCTCCTGCCCTGGGT          | miRNA | miR-4685-3p  |
| t0088713 | 20 | 1 TCTCCCTCCTGCCCTGGCT          | miRNA | miR-4685-3p  |
| t0088859 | 22 | 1 ACTCCCTCCTGCCCTGGCAA         | miRNA | miR-4685-3p  |
| t0090021 | 20 | 1 TCTCCCTCCTGCACTGGCT          | miRNA | miR-4685-3p  |
| t0090038 | 20 | 1 TCTCCCTCCTGCCCTGGAT          | miRNA | miR-4685-3p  |
| t0090097 | 21 | 1 AAGCTATTGTTTCAGACTTATG       | miRNA | miR-4678     |
| t0090761 | 20 | 1 AAGGTATTGTTCTGACTTAT         | miRNA | miR-4678     |
| t0090820 | 20 | 1 AAGGTATTGTTAAGACTTAT         | miRNA | miR-4678     |
| t0091033 | 21 | 1 AAGGAATTGTTTCAGACTTATG       | miRNA | miR-4678     |
| t0092264 | 20 | 1 AAGGGATTGTTTCAGACTTAT        | miRNA | miR-4678     |
| t0092676 | 21 | 1 AAGGTATTGTTTCAGAATTATG       | miRNA | miR-4678     |
| t0092778 | 23 | 1 ATATACACACACACATACACAGA      | miRNA | miR-466b-2*  |
| t0053884 | 21 | 1 TCTTCTTAGACATGGAAACGT        | miRNA | miR-4659a-3p |
| t0058430 | 21 | 1 TCTTCTTAGGCATGGCAACGT        | miRNA | miR-4659a-3p |
| t0062111 | 29 | 1 AAGGGCTGGGTCGGTCGGGATGGGGCGC | miRNA | miR-4651     |
| t0066171 | 29 | 1 AGCGTCGGTCGGGCTGGGGCGCGAAGCC | miRNA | miR-4651     |
| t0071750 | 25 | 1 AAGGGCTGGGTCGGTCGGGCAAATC    | miRNA | miR-4651     |
| t0080617 | 30 | 1 AGGGCTGGGTCGGTCGGGCTGGGGAGCC | miRNA | miR-4651     |
| t0046562 | 25 | 1 GGCTGGGTCGGTCGGGCTGGGGGGC    | miRNA | miR-4651     |
| t0059200 | 28 | 1 AGGGCTGTGTCGGTCGGGCTGGGGCGCG | miRNA | miR-4651     |
| t0060659 | 30 | 1 AGGGCTGGGTCGGTCGGGCTGGGGCGCA | miRNA | miR-4651     |
| t0075187 | 27 | 1 AGGGCTGGGTCGGTCGGGCTGGGGAGC  | miRNA | miR-4651     |
| t0082417 | 26 | 1 AGGGCTGGGTCGGTCGGGATGGGGCG   | miRNA | miR-4651     |
| t0089520 | 19 | 1 AAGGGCTGGGGCGGTTCGGG         | miRNA | miR-4651     |
| t0078044 | 28 | 1 AGGGCTGGGTCGGTCGGGCTGGGGCGGT | miRNA | miR-4651     |
| t0062752 | 26 | 1 GGGCTGGGTCGGTCGGGCTGGGGGGC   | miRNA | miR-4651     |
| t0068674 | 29 | 1 AGGGCTGGGTCGGTCGGGCTGGGGCGAT | miRNA | miR-4651     |
| t0041304 | 22 | 1 AAGGGCTGGGTCTGTCGGGCTG       | miRNA | miR-4651     |
| t0041722 | 22 | 1 AGGGCTGGGTCGGTTGGGCTGG       | miRNA | miR-4651     |
| t0041844 | 23 | 1 TAAGGGCTGGGCCGTCGGGCTG       | miRNA | miR-4651     |
| t0043594 | 20 | 1 TAAGGGCTGAGTCGGTCGGG         | miRNA | miR-4651     |
| t0044450 | 26 | 1 AGGGCTGGGTCGGACGGGCTGGGGCG   | miRNA | miR-4651     |
| t0045973 | 20 | 1 AGGGCTGGGGCGGTCGGGCT         | miRNA | miR-4651     |
| t0046106 | 20 | 1 CCTTGGGATGGGTCGATCGG         | miRNA | miR-4651     |
| t0047593 | 18 | 1 AGGGCTGGGGCGGTCGGG           | miRNA | miR-4651     |
| t0050966 | 19 | 1 AAGGGCTGGGTCGGGCGGG          | miRNA | miR-4651     |
| t0051189 | 28 | 1 AGGGCTGGGGCGGTCGGGCTGGGGCGC  | miRNA | miR-4651     |
| t0052325 | 25 | 1 AGGCTGGGTAGGTCGGGCTGGGGCG    | miRNA | miR-4651     |
| t0055186 | 24 | 1 CTGGGTAGGTCGGGCTGGGGCGCG     | miRNA | miR-4651     |
| t0055246 | 25 | 1 GCTGGGTCGGTCGGGCTGGGGCGGT    | miRNA | miR-4651     |
| t0061161 | 28 | 1 AAGGGCTGGGTCGGTCGGGCTGGGGGGC | miRNA | miR-4651     |
| t0061236 | 26 | 1 AGGGCGGGTCGGTCGGGCTGGGGCG    | miRNA | miR-4651     |
| t0063765 | 28 | 1 AGGGCTGGGTCGGTCGGGCTGGGGAGCC | miRNA | miR-4651     |
| t0064100 | 28 | 1 AGGGCTGGGACGGTCGGGCTGGGGCGAT | miRNA | miR-4651     |
| t0064123 | 22 | 1 ACTGGGAAGAGGAGCTGTGGGA       | miRNA | miR-4646-5p  |
| t0064505 | 20 | 1 TGGGAAGAGGGGCTGAGGGA         | miRNA | miR-4646-5p  |
| t0065269 | 20 | 1 TGGGAAGAGGAGATGAGGGA         | miRNA | miR-4646-5p  |
| t0065392 | 22 | 1 ACTGGGAAGAGGCGCTGAGGGA       | miRNA | miR-4646-5p  |
| t0069697 | 22 | 1 ACTGGGAAGAGGGGCTGAGGGA       | miRNA | miR-4646-5p  |
| t0070890 | 22 | 1 ACTGGGAGGAGGAGCTGAGGGA       | miRNA | miR-4646-5p  |
| t0077152 | 21 | 1 TGGGAAGAGGAGCTGAGGGAC        | miRNA | miR-4646-5p  |
| t0081523 | 22 | 1 TAATAACTGCAGATCAAGTGA        | miRNA | miR-4637     |
| t0082627 | 22 | 1 AAGCAGCACGTAATAATTGGTG       | miRNA | miR-457b     |
| t0085893 | 22 | 1 AAGCAGCACGTAATACTGGCG        | miRNA | miR-457b     |
| t0087439 | 23 | 1 AAGCAGCACGTAATAATTGGCGT      | miRNA | miR-457b     |

|          |    |                               |       |          |
|----------|----|-------------------------------|-------|----------|
| t0087442 | 21 | 1 AAGCAGCACGTAATATTGGA        | miRNA | miR-457b |
| t0093137 | 21 | 1 AAGCAGCACGTAATATTGGC        | miRNA | miR-457b |
| t0041326 | 22 | 1 AAGCAGCACGTAATATTGGAG       | miRNA | miR-457b |
| t0046191 | 23 | 1 TAGTGCAATATTGCTTATAGGGG     | miRNA | miR-454b |
| t0063753 | 24 | 1 TAGTGCAATATTGCTTATAGGGGT    | miRNA | miR-454b |
| t0064943 | 22 | 1 TAGCGCAATATTGCTTATAGGG      | miRNA | miR-454  |
| t0077633 | 23 | 1 CGACTCTGGATAGCTGGGCTTTT     | miRNA | miR-4538 |
| t0079470 | 24 | 1 TTCGACTCTGGATAGCTGGGTTTT    | miRNA | miR-4538 |
| t0089897 | 23 | 1 CGACTCTGGATAACTGGGCTTAT     | miRNA | miR-4538 |
| t0047313 | 23 | 1 CGACTCTGGATAGCTGGGCTTCT     | miRNA | miR-4538 |
| t0042609 | 23 | 1 TTCGACTCTGGATAACTGGGTTA     | miRNA | miR-4538 |
| t0058901 | 23 | 1 TCGACTCTGGATAACTGGGCTAC     | miRNA | miR-4538 |
| t0061026 | 23 | 1 TTCGACTCTGGATAGCTGGGTTT     | miRNA | miR-4538 |
| t0076182 | 21 | 1 TCGACTCTGGATAGCTGGGAT       | miRNA | miR-4538 |
| t0084889 | 23 | 1 TTTGACTCTGGATAGCTGGTTT      | miRNA | miR-4538 |
| t0090250 | 23 | 1 CGACTCTGGATAACTGGGCTTTT     | miRNA | miR-4538 |
| t0053677 | 20 | 1 GACTCTGGATAGCTGGGCTA        | miRNA | miR-4538 |
| t0083163 | 21 | 1 ATAGCAAGAGAAACATTACCA       | miRNA | miR-451b |
| t0065245 | 21 | 1 ATAGCAAGAGGACCATTACCA       | miRNA | miR-451b |
| t0053493 | 25 | 1 CGGGGGGAGAAGGGACGGGGCGGCA   | miRNA | miR-4516 |
| t0054198 | 20 | 1 AGAAGGGTTCGGGGCGGTTT        | miRNA | miR-4516 |
| t0054309 | 20 | 1 AGAGAAGGGTTCGGGGCGGCT       | miRNA | miR-4516 |
| t0056736 | 25 | 1 CGGGGGGAGGAGGGTTCGGGGCGGGA  | miRNA | miR-4516 |
| t0057359 | 21 | 1 AGAAGGGTTCGGGGCGGCAGGG      | miRNA | miR-4516 |
| t0068984 | 26 | 1 GGGAGAAGGGTTCGGGGCGGCCGGGC  | miRNA | miR-4516 |
| t0075333 | 25 | 1 GGAGAAGGGTTCGGGGCGGCAGGGC   | miRNA | miR-4516 |
| t0076056 | 20 | 1 GGAGAAGGGTTGGGGCGGCT        | miRNA | miR-4516 |
| t0082420 | 21 | 1 GAAGGGTTCGGGGCGGCCGTTT      | miRNA | miR-4516 |
| t0089523 | 23 | 1 GGACAAGGGTTCGGGGCGGCAGGG    | miRNA | miR-4516 |
| t0093446 | 21 | 1 GGGGGGAGAAGGGGCGGGGCG       | miRNA | miR-4516 |
| t0068767 | 22 | 1 GGGGGGCGAAGGGTTCGGGGCGG     | miRNA | miR-4516 |
| t0080101 | 20 | 1 GAGACGGGTTCGGGGCGGGCG       | miRNA | miR-4516 |
| t0041539 | 21 | 1 GAAGGGTTCGGGGAGGCAGTTT      | miRNA | miR-4516 |
| t0042747 | 26 | 1 CGGGGGGAGAAGGGTTCGGGGCGGAAG | miRNA | miR-4516 |
| t0048445 | 24 | 1 AGAGAAGGGTTCGGGGAGGCAGGGG   | miRNA | miR-4516 |
| t0052338 | 22 | 1 TGAGGGAGTAGGGTGTGTGGTC      | miRNA | miR-4510 |
| t0058082 | 24 | 1 TGAGGTAGTAGGGTGTGTGGTAAA    | miRNA | miR-4510 |
| t0061977 | 21 | 1 TGAGGGAGTAGGTTGTGTAGT       | miRNA | miR-4510 |
| t0064639 | 25 | 1 TGAGGGAGTAGGTTGTGTGGTTAGA   | miRNA | miR-4510 |
| t0070558 | 21 | 1 TGAGGGAGTCGGTTGTGTGGT       | miRNA | miR-4510 |
| t0071384 | 23 | 1 TGAGGGAGTAGGTTGTGGGGTAA     | miRNA | miR-4510 |
| t0072247 | 22 | 1 TGAGGGAGTAGGTTGTGTGGAG      | miRNA | miR-4510 |
| t0073842 | 21 | 1 TGAGGGAGTGGTTGTGTGGT        | miRNA | miR-4510 |
| t0074966 | 22 | 1 TAAGGGAGTAGGTTGTGTGGTT      | miRNA | miR-4510 |
| t0077838 | 21 | 1 TGAGGGAGTAGGGTGTGTGTT       | miRNA | miR-4510 |
| t0083698 | 21 | 1 TGAGGGACTAGGTTGTGTGGT       | miRNA | miR-4510 |
| t0090635 | 24 | 1 TGAGGGAGTAGGTTGTGTGGTATT    | miRNA | miR-4510 |
| t0091404 | 22 | 1 TGAGGTAGTAGGGGTGTGGTA       | miRNA | miR-4510 |
| t0043111 | 21 | 1 GAGGGAGTAGGTTGTGTGGTA       | miRNA | miR-4510 |
| t0043327 | 24 | 1 TGAGGGAGTAGGGTGTGTGGTTAA    | miRNA | miR-4510 |
| t0043629 | 22 | 1 TGAGGGAGTAGGTTGTGTGGAA      | miRNA | miR-4510 |
| t0045172 | 21 | 1 TGAGGGATTAGGTTGTGTGGT       | miRNA | miR-4510 |
| t0045366 | 21 | 1 TGAGGGAGTAGGTTGTGCGGT       | miRNA | miR-4510 |
| t0045509 | 24 | 1 TGAGGGAGTAGGTTGTGTGGTTTT    | miRNA | miR-4510 |
| t0045541 | 24 | 1 TGAGGTAGTAGGGTGTGTGGTATC    | miRNA | miR-4510 |
| t0048257 | 24 | 1 TGAGGGAGTAGGGTGTGTGGTTAT    | miRNA | miR-4510 |
| t0048437 | 21 | 1 GAGGGAGTAGGTTGTGTGGTT       | miRNA | miR-4510 |
| t0049930 | 22 | 1 TGAGGGACTAGGTTGTGTGGTT      | miRNA | miR-4510 |

|          |    |                              |       |          |
|----------|----|------------------------------|-------|----------|
| t0050968 | 23 | 1 TGAGGTAGTAGGGTGTGTGGTAG    | miRNA | miR-4510 |
| t0051375 | 22 | 1 TGAGGGAGTATGTTGTGTGGTT     | miRNA | miR-4510 |
| t0053358 | 20 | 1 TGAGGGAGTAGGTTGTGGGG       | miRNA | miR-4510 |
| t0053555 | 21 | 1 TTGAGGGAGTAGGTTGTGTGG      | miRNA | miR-4510 |
| t0054185 | 20 | 1 TGAGGGAGTAGGTTATGTGG       | miRNA | miR-4510 |
| t0055611 | 18 | 1 TGAGGGAGTAGGTTGTGG         | miRNA | miR-4510 |
| t0055892 | 23 | 1 TGAGGGAGTAGGTTGTGTGGTGA    | miRNA | miR-4510 |
| t0057369 | 22 | 1 TGAGGGAGTAGGTTGTCTGGTT     | miRNA | miR-4510 |
| t0059107 | 22 | 1 TGAGGGAGTAGGTTGTGTGGTG     | miRNA | miR-4510 |
| t0059453 | 20 | 1 TGAGGGAGTAGGTTGTGTAG       | miRNA | miR-4510 |
| t0062156 | 20 | 1 TGAGGGAGTAGGGTGTGTAG       | miRNA | miR-4510 |
| t0063500 | 22 | 1 TGAGGGAGTAGCTTGTGTGGTT     | miRNA | miR-4510 |
| t0063670 | 21 | 1 TGAGGGAGTAGGTTGTGTTGT      | miRNA | miR-4510 |
| t0064004 | 22 | 1 TGAGGGAGTAGGTTGCGTGGTT     | miRNA | miR-4510 |
| t0066155 | 21 | 1 TGAGGGAGTAGGTTGTCTGGT      | miRNA | miR-4510 |
| t0066257 | 22 | 1 TGAGGGAGTAGGTTGTGTCGTT     | miRNA | miR-4510 |
| t0066674 | 22 | 1 TGAGGGAGTAGGTTGGGTGGTT     | miRNA | miR-4510 |
| t0067017 | 22 | 1 TGAGGGAGTAGGGTGTGGGGTT     | miRNA | miR-4510 |
| t0067692 | 22 | 1 TGAGGGAGTAGGTTGTGTGGGA     | miRNA | miR-4510 |
| t0067795 | 22 | 1 TCGGGGAGTAGGTTGTGTGGTT     | miRNA | miR-4510 |
| t0067940 | 22 | 1 TGAGGGAGTAGTTTGTGTGGTT     | miRNA | miR-4510 |
| t0070257 | 22 | 1 TCAGGGAGTAGGTTGTGTGGTA     | miRNA | miR-4510 |
| t0071303 | 21 | 1 TGAGGGAGTAGGTCGTGTGGT      | miRNA | miR-4510 |
| t0075996 | 21 | 1 TGAGGGAGTAGGCTGTGTGGT      | miRNA | miR-4510 |
| t0076586 | 22 | 1 TGAGGGAGTAGGGTGTATGGTT     | miRNA | miR-4510 |
| t0079226 | 21 | 1 TGAGGGAGTAGTTTGTGTGGT      | miRNA | miR-4510 |
| t0079922 | 20 | 1 TGAGGGAGTAGTTTGTGTGG       | miRNA | miR-4510 |
| t0080797 | 26 | 1 TGAGGGAGTAGGTTGTGTGGTTTATC | miRNA | miR-4510 |
| t0082280 | 25 | 1 AAACCGCTACCATTACTGAGTTTAG  | miRNA | miR-451  |
| t0086526 | 22 | 1 AAACCTTTACCATTACCGAGTT     | miRNA | miR-451  |
| t0087030 | 22 | 1 AAACCGCTACTATTACTGAGTT     | miRNA | miR-451  |
| t0087227 | 23 | 1 AAACCGTTACAATTACTGAGTAA    | miRNA | miR-451  |
| t0089206 | 21 | 1 AAACCGTTACCATTAGGGAGT      | miRNA | miR-451  |
| t0089998 | 24 | 1 AAACCGTTACCCTACTGAGTTTG    | miRNA | miR-451  |
| t0090019 | 25 | 1 AAACCGTTAACATTACTGAGTTAA   | miRNA | miR-451  |
| t0090609 | 22 | 1 AAACCTTAACATTACTGAGTT      | miRNA | miR-451  |
| t0091264 | 21 | 1 AAAACGTTACCATTAATGAGT      | miRNA | miR-451  |
| t0091807 | 19 | 1 AACCCGTTACCATTACTGA        | miRNA | miR-451  |
| t0092215 | 20 | 1 AAACCTTACCATTATTGAG        | miRNA | miR-451  |
| t0092675 | 25 | 1 AAACCGTTACCATTACTGAGTTTAC  | miRNA | miR-451  |
| t0092879 | 22 | 1 AAACCATTACCATTACTCAGTT     | miRNA | miR-451  |
| t0040762 | 23 | 1 AAACCGTTGCCATTACTGAGTTA    | miRNA | miR-451  |
| t0041159 | 24 | 1 AAACCGTTACCATTACTGCGTTTG   | miRNA | miR-451  |
| t0041292 | 22 | 1 AAACCGTTACCATTATTGGGTT     | miRNA | miR-451  |
| t0041484 | 22 | 1 AAAGTTAACATTACTGAGTT       | miRNA | miR-451  |
| t0041568 | 23 | 1 AAAACTGTTACCATTACTGAGTT    | miRNA | miR-451  |
| t0041625 | 23 | 1 AAACCGTTACCATTACTGAGTAT    | miRNA | miR-451  |
| t0041934 | 22 | 1 AAACCGTTGCCATCACTGAGTT     | miRNA | miR-451  |
| t0042082 | 21 | 1 AAACAGTTACCATTACTCAGT      | miRNA | miR-451  |
| t0042098 | 23 | 1 AAACCGTTACCATTACCCAGTTT    | miRNA | miR-451  |
| t0042211 | 22 | 1 AAACCGTTACCATTACTTAGTA     | miRNA | miR-451  |
| t0042364 | 26 | 1 AAACCGTTACCATTACTGAGATTAGT | miRNA | miR-451  |
| t0042422 | 20 | 1 AAACCATTACCATTACTGAC       | miRNA | miR-451  |
| t0042721 | 22 | 1 AAACCTCTACCATTACTGAGTT     | miRNA | miR-451  |
| t0042748 | 19 | 1 AAACCATTACCGTTACTGA        | miRNA | miR-451  |
| t0042865 | 20 | 1 AAACCGTTACCATTATTGAA       | miRNA | miR-451  |
| t0042979 | 23 | 1 AAAACGTCACCATTACTGAGTTT    | miRNA | miR-451  |
| t0043504 | 23 | 1 AAATCATTACCATTACTGAGTTT    | miRNA | miR-451  |

|          |    |                               |       |         |
|----------|----|-------------------------------|-------|---------|
| t0043557 | 26 | 1 GATAAACAGTTACCATTACTGAGTTT  | miRNA | miR-451 |
| t0043611 | 23 | 1 AAACCTTTACCATTACTGAGCTT     | miRNA | miR-451 |
| t0043671 | 22 | 1 AAACCGTTACCATTATTGAGCT      | miRNA | miR-451 |
| t0043745 | 23 | 1 AAACCGTTACCCTTACTGAGTTG     | miRNA | miR-451 |
| t0043953 | 22 | 1 AAACCGTTACCATTACTCCGTT      | miRNA | miR-451 |
| t0044131 | 20 | 1 AAACCGTTACCATTATTGGG        | miRNA | miR-451 |
| t0044213 | 19 | 1 AAACCGTTACCCTACTGA          | miRNA | miR-451 |
| t0044262 | 22 | 1 AAACCGTTACCATTACTAAGGT      | miRNA | miR-451 |
| t0044472 | 20 | 1 AAACAGTTATCATTACTGAG        | miRNA | miR-451 |
| t0044518 | 21 | 1 AAACAGTTACCGTTACTGAGT       | miRNA | miR-451 |
| t0044542 | 21 | 1 AAACCGTTAGCATTATTGAGT       | miRNA | miR-451 |
| t0045113 | 22 | 1 AAACCGTTACCATTATTAAGTT      | miRNA | miR-451 |
| t0045145 | 21 | 1 AAACCGTTAACAGTACTGAGT       | miRNA | miR-451 |
| t0045185 | 21 | 1 AAACCTTTACCATCACTGAGT       | miRNA | miR-451 |
| t0045244 | 20 | 1 AAACCGTTAAGATTACTGAG        | miRNA | miR-451 |
| t0045297 | 21 | 1 AAACCGTTACCATTAATGAGA       | miRNA | miR-451 |
| t0045371 | 23 | 1 AAACCGTTACCATTACTGGGTTA     | miRNA | miR-451 |
| t0045493 | 22 | 1 AAACCGTGACCATTACTGAGGT      | miRNA | miR-451 |
| t0045867 | 23 | 1 AAACCGTTACCATTATTGCGTTT     | miRNA | miR-451 |
| t0045877 | 21 | 1 AAACCGGTACGATTACTGAGT       | miRNA | miR-451 |
| t0046107 | 24 | 1 AAACCGTTACCATTAATGAGTAAA    | miRNA | miR-451 |
| t0046213 | 21 | 1 AAACCGCTACCATTACTCAGT       | miRNA | miR-451 |
| t0046339 | 25 | 1 AAACCGTTACCATTACTGAGTTGAG   | miRNA | miR-451 |
| t0046348 | 23 | 1 AAACCTGTTACCATTACTGAGTAA    | miRNA | miR-451 |
| t0046602 | 23 | 1 AAACAGTCACCATTACTGAGTTT     | miRNA | miR-451 |
| t0046667 | 21 | 1 AAACCGTTACAATTACTGCGT       | miRNA | miR-451 |
| t0046841 | 22 | 1 GAACCGTTACCATTACTGAGTA      | miRNA | miR-451 |
| t0046884 | 21 | 1 AAACCTGTTACCATTACTCAGT      | miRNA | miR-451 |
| t0046904 | 22 | 1 AAACCGTCACCCTACTGAGTT       | miRNA | miR-451 |
| t0046932 | 21 | 1 AAACCGGTACCATTATTGAGT       | miRNA | miR-451 |
| t0046933 | 22 | 1 AAACCGCTACCATTACCGAGTT      | miRNA | miR-451 |
| t0046959 | 21 | 1 AAACCGTTACCATTAAGGAGT       | miRNA | miR-451 |
| t0047094 | 18 | 1 CGTTACCATTACTGAGTT          | miRNA | miR-451 |
| t0047101 | 22 | 1 CGTTACCATTACTGGGTTAAAC      | miRNA | miR-451 |
| t0047237 | 24 | 1 AAACCGTCACCATTACTGAGTTAG    | miRNA | miR-451 |
| t0047428 | 21 | 1 AAACCGTTACCATTATTGCGT       | miRNA | miR-451 |
| t0047463 | 24 | 1 AAACCGATAACCATTACTGAGTTTA   | miRNA | miR-451 |
| t0047518 | 23 | 1 AAACCGTTACCATTACTGAGACA     | miRNA | miR-451 |
| t0047600 | 22 | 1 AAACCGTTATCGTTACTGAGTT      | miRNA | miR-451 |
| t0047683 | 27 | 1 AAACCGTTACCATTACTGAGTTCAAAA | miRNA | miR-451 |
| t0047705 | 22 | 1 AAAAAGTTACCATTACTGAGTT      | miRNA | miR-451 |
| t0047861 | 21 | 1 AAACCTTTACCATTACTGAAT       | miRNA | miR-451 |
| t0048260 | 23 | 1 AAACCGTACCCATTACTGAGTTT     | miRNA | miR-451 |
| t0048562 | 20 | 1 AAACCGTGACCATTACTGAG        | miRNA | miR-451 |
| t0048565 | 19 | 1 CAACCGTTACCATTACTGA         | miRNA | miR-451 |
| t0048590 | 23 | 1 ACACCGTTAACATTACTGAGTTT     | miRNA | miR-451 |
| t0048638 | 25 | 1 AAACCGTTAACATTAATGAGTTTAG   | miRNA | miR-451 |
| t0048826 | 21 | 1 AAACCGTTACCATTACTTAGC       | miRNA | miR-451 |
| t0049161 | 21 | 1 AACCGTTACCATTACTGCGTT       | miRNA | miR-451 |
| t0049166 | 21 | 1 AAACCGTTACTATTACTTAGT       | miRNA | miR-451 |
| t0049203 | 25 | 1 AAACCGTTACCAATACTGAGTTTGG   | miRNA | miR-451 |
| t0049239 | 21 | 1 AAATCCTTACCATTACTGAGT       | miRNA | miR-451 |
| t0049310 | 22 | 1 AAACCGTTAACCTTACTGAGTT      | miRNA | miR-451 |
| t0049373 | 21 | 1 AAACCTTACCATTACTGAGG        | miRNA | miR-451 |
| t0049727 | 25 | 1 AGCAAACCGTTACCATTACTGAGTT   | miRNA | miR-451 |
| t0049798 | 21 | 1 CGTTACAATTACTGAGTAAAC       | miRNA | miR-451 |
| t0049957 | 24 | 1 AAACCGCTACCATTACTGAGTTTA    | miRNA | miR-451 |
| t0050164 | 23 | 1 AAACCGTTACCATTAATGAGGTT     | miRNA | miR-451 |

|          |    |                                  |       |         |
|----------|----|----------------------------------|-------|---------|
| t0050203 | 23 | 1 AAACCGTTACCATTACCGAGTTG        | miRNA | miR-451 |
| t0050510 | 26 | 1 AAACCGTTACCATTACGGAGTTTAGT     | miRNA | miR-451 |
| t0050856 | 23 | 1 AAACCGTTATCATTACTGAGTCT        | miRNA | miR-451 |
| t0051053 | 21 | 1 AAACCGTTACCATTAATGCGT          | miRNA | miR-451 |
| t0051221 | 25 | 1 AAACCGTTACCGTTACTGAGTTTAG      | miRNA | miR-451 |
| t0051516 | 22 | 1 AAACCTTCACCATTACTGAGTT         | miRNA | miR-451 |
| t0051599 | 25 | 1 CAACCGTTACCATTACTGAGTTTAG      | miRNA | miR-451 |
| t0051657 | 23 | 1 AAACCGTCATCATTACTGAGTTT        | miRNA | miR-451 |
| t0051704 | 22 | 1 AATCCGTTACCATTACTAAGTT         | miRNA | miR-451 |
| t0051759 | 29 | 1 AAACCGCTACCATTACTGAGTTCGTTCGAT | miRNA | miR-451 |
| t0051761 | 23 | 1 AAACCGTTACCATTACTGAGATA        | miRNA | miR-451 |
| t0051804 | 21 | 1 AAACAGTTACCATTACTGAGG          | miRNA | miR-451 |
| t0051853 | 26 | 1 AAACCGTTACCATTACTGAGTTCAGT     | miRNA | miR-451 |
| t0051956 | 23 | 1 AAACCGTTATCATTAAATGAGTTT       | miRNA | miR-451 |
| t0051982 | 23 | 1 AAACCTTTACCATTACTGAGATT        | miRNA | miR-451 |
| t0052122 | 25 | 1 AAACCATTACCATTACTGAGTTACA      | miRNA | miR-451 |
| t0052391 | 22 | 1 AAACCGTTACCATTATTGAGTG         | miRNA | miR-451 |
| t0052534 | 22 | 1 AGACCTTTACCATTACTGAGTT         | miRNA | miR-451 |
| t0052853 | 18 | 1 AAACGTTACCATTACTG              | miRNA | miR-451 |
| t0053045 | 21 | 1 AAAACGTTACCATTACTGCGT          | miRNA | miR-451 |
| t0053176 | 22 | 1 AAACCGTTACCGTTACTCAGTT         | miRNA | miR-451 |
| t0053184 | 22 | 1 AAACCGTTACCATTAATGAGAT         | miRNA | miR-451 |
| t0053626 | 23 | 1 AAACCTTTACCATTACCGAGTTT        | miRNA | miR-451 |
| t0053748 | 22 | 1 AAAACCTTACCATTACTGAGTT         | miRNA | miR-451 |
| t0053807 | 21 | 1 AAACGTTACCATTATTGAGT           | miRNA | miR-451 |
| t0054053 | 22 | 1 AAACCGTTACGATTACTGAGGT         | miRNA | miR-451 |
| t0054101 | 20 | 1 AGACCGTTACCATTATTGAG           | miRNA | miR-451 |
| t0054236 | 21 | 1 AACCGTTACCATTACTGAGAT          | miRNA | miR-451 |
| t0054387 | 22 | 1 AAACCGTTAACTTTACTGAGTT         | miRNA | miR-451 |
| t0054515 | 20 | 1 AAACCGTTACCATTACGTAG           | miRNA | miR-451 |
| t0054565 | 22 | 1 AAACCGTTACCCTTACTGAGTA         | miRNA | miR-451 |
| t0054757 | 22 | 1 AAACCGTTACCATTACTGCGGT         | miRNA | miR-451 |
| t0054799 | 26 | 1 AAACCGTTACCATTATTGAGTTTAGT     | miRNA | miR-451 |
| t0054898 | 23 | 1 AAACCTTACCCTTACTGAGTTT         | miRNA | miR-451 |
| t0054956 | 18 | 1 AAACAGTTACCATTACTG             | miRNA | miR-451 |
| t0054972 | 22 | 1 AAACCGTTACCCTTACTGCGTT         | miRNA | miR-451 |
| t0055312 | 21 | 1 AAACCTTTATCATTACTGAGT          | miRNA | miR-451 |
| t0055336 | 22 | 1 AAACCGTTACCACTATTGAGTT         | miRNA | miR-451 |
| t0055504 | 19 | 1 AAACCGTTACCATTACTCG            | miRNA | miR-451 |
| t0055640 | 23 | 1 AAACCGTTACCATTACTGGTTTT        | miRNA | miR-451 |
| t0055674 | 21 | 1 AAACCTTTACCATTACTGGGT          | miRNA | miR-451 |
| t0055931 | 22 | 1 AAACCGTTACTATTACTCAGTT         | miRNA | miR-451 |
| t0055990 | 22 | 1 AAACCGTTACAATTACTGAGCT         | miRNA | miR-451 |
| t0056006 | 23 | 1 AAACCTTTACCATTACTGGGTTT        | miRNA | miR-451 |
| t0056228 | 22 | 1 AAACCGTTACACTTACTGAGTT         | miRNA | miR-451 |
| t0056377 | 27 | 1 AAACCGTTACCATTACTGAGTCGTAGG    | miRNA | miR-451 |
| t0056951 | 26 | 1 AAAACGTTACCATTACTGAGTTTAGT     | miRNA | miR-451 |
| t0056988 | 20 | 1 AAACCGTTACCATTATTAAG           | miRNA | miR-451 |
| t0057059 | 23 | 1 AAACCTTTACCGTTACTGAGTTT        | miRNA | miR-451 |
| t0057258 | 23 | 1 AAACCGTTACCATTAATGAGTAA        | miRNA | miR-451 |
| t0057357 | 22 | 1 TACCTTTACCATTACTGAGTTT         | miRNA | miR-451 |
| t0057573 | 23 | 1 AAACAGTTAACATTACTGAGTTA        | miRNA | miR-451 |
| t0057886 | 25 | 1 AAACCGTTACAATTACTGAGTTTAG      | miRNA | miR-451 |
| t0057974 | 20 | 1 AAACCGTTAACATTACTGAA           | miRNA | miR-451 |
| t0058196 | 19 | 1 AAACCGTTACCGTTAATGA            | miRNA | miR-451 |
| t0058313 | 21 | 1 AAACCGTTACCATTAGTGAGG          | miRNA | miR-451 |
| t0058467 | 22 | 1 AAACCTTTCCATTACTGAGTT          | miRNA | miR-451 |
| t0058578 | 25 | 1 AAACCGTTACCATTACTTAGTTTAG      | miRNA | miR-451 |

|          |    |                               |       |         |
|----------|----|-------------------------------|-------|---------|
| t0058663 | 18 | 1 AAACCGTTACCATTAATG          | miRNA | miR-451 |
| t0058769 | 22 | 1 AAACGGTACCATTGCTGAGTT       | miRNA | miR-451 |
| t0058825 | 21 | 1 AAACCGTTACCGTTACCGAGT       | miRNA | miR-451 |
| t0058841 | 20 | 1 AAACCGTTACCATTACGGGG        | miRNA | miR-451 |
| t0058953 | 25 | 1 AACAGTTACCATTACTGAGTTTAG    | miRNA | miR-451 |
| t0059458 | 20 | 1 AACCGTTACCATTATTGAGT        | miRNA | miR-451 |
| t0059461 | 21 | 1 AAAGTTACCATTACTGAGA         | miRNA | miR-451 |
| t0059682 | 23 | 1 AAACCGTTACCATTACTGCGGTT     | miRNA | miR-451 |
| t0059705 | 23 | 1 AAACCGTTGCCATTACTGAGGTT     | miRNA | miR-451 |
| t0059842 | 22 | 1 AAACCGTTACCGTTACTGGGTT      | miRNA | miR-451 |
| t0060460 | 22 | 1 AAACCGTTACCATTATTTAGTT      | miRNA | miR-451 |
| t0060635 | 20 | 1 AAAAAGTTACCATTACTGAG        | miRNA | miR-451 |
| t0060751 | 23 | 1 AAACCTTTACCATTACTAAGTTT     | miRNA | miR-451 |
| t0060945 | 23 | 1 GAACCGTTACCATTACTGAGTTA     | miRNA | miR-451 |
| t0061048 | 21 | 1 AAACCGTTAACATTACTTAGT       | miRNA | miR-451 |
| t0061099 | 22 | 1 AAACCGTTACCATTGCTGCGTT      | miRNA | miR-451 |
| t0061125 | 22 | 1 AAACAGTTATCATTACTGAGTT      | miRNA | miR-451 |
| t0061428 | 19 | 1 AAACCGTTACCAACTACTGA        | miRNA | miR-451 |
| t0061499 | 20 | 1 AAACAGTTACCATTACTTAG        | miRNA | miR-451 |
| t0061676 | 26 | 1 AAACCGTTACCATCACTGAGTTTAGT  | miRNA | miR-451 |
| t0061837 | 21 | 1 AAACCGTTAACATTACTGAGA       | miRNA | miR-451 |
| t0061883 | 21 | 1 AAGCCTTTACCATTACTGAGT       | miRNA | miR-451 |
| t0061993 | 20 | 1 AAACCGTTACCATTACTAGG        | miRNA | miR-451 |
| t0062165 | 22 | 1 AAACAGTTACCATTACTGAGTA      | miRNA | miR-451 |
| t0062419 | 23 | 1 AAACCGTTACCATTACTGAGTAG     | miRNA | miR-451 |
| t0062505 | 19 | 1 AAACCGTTACCTTACTGA          | miRNA | miR-451 |
| t0062575 | 23 | 1 AGACCCTTACCATTACTGAGTTT     | miRNA | miR-451 |
| t0062902 | 21 | 1 AAACAGTTACCATTACTAAGT       | miRNA | miR-451 |
| t0063221 | 23 | 1 AAACCGATACCATTACTGAGTAA     | miRNA | miR-451 |
| t0063225 | 23 | 1 GAACCTTTACCATTACTGAGTTT     | miRNA | miR-451 |
| t0063361 | 22 | 1 AAACCGTTACCATTATTGCGTT      | miRNA | miR-451 |
| t0063499 | 24 | 1 AAACCGTTACCATTACTAAGTTTA    | miRNA | miR-451 |
| t0063558 | 23 | 1 AAACAGTTACCATTACTGAGTAA     | miRNA | miR-451 |
| t0063576 | 23 | 1 AAACCTTTACCATTACTGACTTT     | miRNA | miR-451 |
| t0063613 | 21 | 1 AAACCGTTACCATTATTGGGT       | miRNA | miR-451 |
| t0063665 | 27 | 1 AAACCGTTACCATTACTGAGTTTAGAA | miRNA | miR-451 |
| t0063936 | 23 | 1 AAACCGTCACCATTACTGAGTTC     | miRNA | miR-451 |
| t0063951 | 21 | 1 AAACCGTTACCATTACCGGGT       | miRNA | miR-451 |
| t0063991 | 19 | 1 AAACGGTTACCATTACTGA         | miRNA | miR-451 |
| t0064285 | 23 | 1 TAACCGTTACCATTACTGAGTTT     | miRNA | miR-451 |
| t0064463 | 22 | 1 AAACCGTCACCATTCTGAGTT       | miRNA | miR-451 |
| t0064578 | 23 | 1 AAAGTTACCATTATTGAGTTT       | miRNA | miR-451 |
| t0064616 | 22 | 1 AAACCGTTACCATTACTGGGAT      | miRNA | miR-451 |
| t0064647 | 20 | 1 AAATCGTCACCATTACTGAG        | miRNA | miR-451 |
| t0065029 | 22 | 1 AAACCGTTACCATTACCGGGTT      | miRNA | miR-451 |
| t0065178 | 22 | 1 AAACGTTACCATTACTGCGTTT      | miRNA | miR-451 |
| t0065237 | 24 | 1 AAACCTTTACTATTACTGAGTTTA    | miRNA | miR-451 |
| t0065645 | 24 | 1 AAAACCGTTACCATTGCTGAGTTA    | miRNA | miR-451 |
| t0065671 | 23 | 1 AAACCGTTACCATTACGGAGTTT     | miRNA | miR-451 |
| t0065736 | 20 | 1 AAAACTTTACCATTACTGAG        | miRNA | miR-451 |
| t0065797 | 19 | 1 AAACAGTTACCGTTACTGA         | miRNA | miR-451 |
| t0065882 | 21 | 1 AAACACTTACCATTACTGAGT       | miRNA | miR-451 |
| t0066060 | 20 | 1 AAACCGTTACAATTACTGCG        | miRNA | miR-451 |
| t0066192 | 19 | 1 ATACCGTTACCATTACTGA         | miRNA | miR-451 |
| t0066311 | 26 | 1 AAATCGTTACCATTACTGAGTTTAGT  | miRNA | miR-451 |
| t0066546 | 21 | 1 CAACCGTTACCATTACTGAAT       | miRNA | miR-451 |
| t0067095 | 25 | 1 CAAAACCGTTACCATTACTGAGTT    | miRNA | miR-451 |
| t0067102 | 22 | 1 AAACCGTTACCATTATTGAGGT      | miRNA | miR-451 |



|          |    |                               |       |         |
|----------|----|-------------------------------|-------|---------|
| t0067310 | 21 | 1 AACCGTTACCATTACTGAGGA       | miRNA | miR-451 |
| t0067892 | 20 | 1 AAACAGTTACCATTACTGAC        | miRNA | miR-451 |
| t0068354 | 23 | 1 AAACCGTTACAATTAATGAGTTT     | miRNA | miR-451 |
| t0068457 | 22 | 1 AAACCTTTACCATTACTGGGTT      | miRNA | miR-451 |
| t0068461 | 22 | 1 AACAGTTACCATTACTGAGTTT      | miRNA | miR-451 |
| t0068823 | 23 | 1 AAACCGTTACCATTAATGCGTTT     | miRNA | miR-451 |
| t0068829 | 22 | 1 AAACCGTCACCATTAATGAGTT      | miRNA | miR-451 |
| t0068911 | 26 | 1 AAAGTGTACCATTACTGAGTTTAGT   | miRNA | miR-451 |
| t0068926 | 19 | 1 AAACCGTTACCATTACAGA         | miRNA | miR-451 |
| t0068982 | 22 | 1 AAACCGTCACCATTACTTAGTT      | miRNA | miR-451 |
| t0069212 | 22 | 1 AAAGCTTTACCATTACTGAGTT      | miRNA | miR-451 |
| t0069355 | 26 | 1 AAACCTTTAACATTACTGAGTTTAGT  | miRNA | miR-451 |
| t0069673 | 21 | 1 AAACCGTTACTATTACTGAGG       | miRNA | miR-451 |
| t0069807 | 26 | 1 AAAACGTTACAATTACTGAGTTTAGT  | miRNA | miR-451 |
| t0069850 | 21 | 1 AAACCATTGCCATTACTGAGT       | miRNA | miR-451 |
| t0069892 | 21 | 1 ATCGTTACCATTATTGAGTTT       | miRNA | miR-451 |
| t0069906 | 25 | 1 AAACCGTTCCCATTACTGAGTTTAG   | miRNA | miR-451 |
| t0070070 | 20 | 1 AACCTTTACCATTACTGAG         | miRNA | miR-451 |
| t0070118 | 21 | 1 AAACCTTTACCATTACTGAGC       | miRNA | miR-451 |
| t0070158 | 22 | 1 AAAGTGTACTATTACTGAGTT       | miRNA | miR-451 |
| t0070322 | 26 | 1 AAACCGTTACCATTGCTGAGTTTAGA  | miRNA | miR-451 |
| t0070585 | 21 | 1 AAACCGTTACCATTGTTGAGT       | miRNA | miR-451 |
| t0070648 | 20 | 1 AAACAGATACCATTACTGAG        | miRNA | miR-451 |
| t0071027 | 22 | 1 AAACCTTTACCATTAATGAGTT      | miRNA | miR-451 |
| t0071234 | 23 | 1 AAACCGTTACCATTACTGAGGTA     | miRNA | miR-451 |
| t0071556 | 21 | 1 AAATCTTTACCATTACTGAGT       | miRNA | miR-451 |
| t0071595 | 22 | 1 AAACCGTTACCATTAGTGAGCT      | miRNA | miR-451 |
| t0071627 | 22 | 1 AAACCGTTACCATTAATGAGCT      | miRNA | miR-451 |
| t0071650 | 24 | 1 AAACCGTTACCATTACTGAGTATA    | miRNA | miR-451 |
| t0071684 | 23 | 1 AAACCGTTATCATTACTAAGTTT     | miRNA | miR-451 |
| t0072094 | 22 | 1 AAACCGTTACAATTACTGAGTA      | miRNA | miR-451 |
| t0072122 | 22 | 1 AAAGTGTACCATTACTGACTT       | miRNA | miR-451 |
| t0072341 | 21 | 1 AAACCGCTACCATTAGTGAGT       | miRNA | miR-451 |
| t0072356 | 21 | 1 AAACCTTTACCAACTACTGAGT      | miRNA | miR-451 |
| t0072456 | 22 | 1 AAACCGCTACCCTTACTGAGTT      | miRNA | miR-451 |
| t0072695 | 22 | 1 AAACCATTACCATTATTGAGTT      | miRNA | miR-451 |
| t0072864 | 23 | 1 AAACAGTTACCATTACTGAGTTA     | miRNA | miR-451 |
| t0073061 | 21 | 1 GAAGTGTACCATTACTGAGT        | miRNA | miR-451 |
| t0073473 | 21 | 1 AAACCGCTACCATTATTGAGT       | miRNA | miR-451 |
| t0073559 | 22 | 1 AAACCGTTACCATTACTGCGCT      | miRNA | miR-451 |
| t0073577 | 25 | 1 AAACCGCTACCATTACTGAGTTTAC   | miRNA | miR-451 |
| t0073608 | 22 | 1 AAACCGTTACCATTAATGCGTT      | miRNA | miR-451 |
| t0073717 | 26 | 1 AAACCGTTACCATTACTGAGCTTAGT  | miRNA | miR-451 |
| t0073791 | 27 | 1 AAACCGTTACCATTACTGCGTCGTCGG | miRNA | miR-451 |
| t0073836 | 20 | 1 AAACCTTTAACATTACTGAG        | miRNA | miR-451 |
| t0074025 | 20 | 1 AAACCTTTACAATTACTGAG        | miRNA | miR-451 |
| t0074091 | 23 | 1 AAAACGTTAACATTACTGAGTTT     | miRNA | miR-451 |
| t0074109 | 21 | 1 AAAGTGTACCATTACCGAGT        | miRNA | miR-451 |
| t0074309 | 19 | 1 AAACCGTTAACGTTACTGA         | miRNA | miR-451 |
| t0074424 | 23 | 1 AAACATTTACCATTACTGAGTTT     | miRNA | miR-451 |
| t0074425 | 23 | 1 AAACCTTTACCATTACTGTGTTT     | miRNA | miR-451 |
| t0074478 | 20 | 1 GAACCGTTACCATTATTGAG        | miRNA | miR-451 |
| t0074548 | 22 | 1 GAACCGTTAACATTACTGAGTT      | miRNA | miR-451 |
| t0074586 | 18 | 1 TAACCGTTACCATTACTG          | miRNA | miR-451 |
| t0074589 | 21 | 1 AAACCTTTACCATTACTAAGT       | miRNA | miR-451 |
| t0074701 | 24 | 1 AAACCGTTACCATTACTGAGTCAA    | miRNA | miR-451 |
| t0074718 | 20 | 1 AAACCGTTAAAATTACTGAG        | miRNA | miR-451 |
| t0074749 | 22 | 1 AAACCTTTACCAACTACTGAGTT     | miRNA | miR-451 |

|          |    |                                 |       |         |
|----------|----|---------------------------------|-------|---------|
| t0075051 | 21 | 1 AAACCGTACTATTATTGAGT          | miRNA | miR-451 |
| t0075328 | 24 | 1 AAACCGTTACCAACTACTGAGTTTA     | miRNA | miR-451 |
| t0075383 | 24 | 1 CAGAAACCGTTACCATTACTGCGT      | miRNA | miR-451 |
| t0075561 | 22 | 1 AAACAGTTACCATTACTGAATT        | miRNA | miR-451 |
| t0075655 | 26 | 1 AAACCGTTACCCTTACTGCGTTTAGT    | miRNA | miR-451 |
| t0075847 | 22 | 1 AAACCGTTAACATTAATGAGTT        | miRNA | miR-451 |
| t0075994 | 19 | 1 AAACCGTTAACATTAATGA           | miRNA | miR-451 |
| t0076177 | 22 | 1 AAACCTTTATCATTACTGAGTT        | miRNA | miR-451 |
| t0076426 | 22 | 1 AAACCTGTCACCATTACTGAGTT       | miRNA | miR-451 |
| t0076509 | 22 | 1 AAACCTGTTACCATTGCTGAGTT       | miRNA | miR-451 |
| t0076517 | 22 | 1 AAACCGCTACCATTACTGGGTT        | miRNA | miR-451 |
| t0076774 | 23 | 1 AAACCGTTTCCATTTCTGAGTTT       | miRNA | miR-451 |
| t0076887 | 21 | 1 AAACAGTTACCATTCTGAGT          | miRNA | miR-451 |
| t0076982 | 23 | 1 AAACCGTCAACATTACTGAGTTT       | miRNA | miR-451 |
| t0076996 | 20 | 1 AAACCGTTAACATTATTGAG          | miRNA | miR-451 |
| t0077254 | 23 | 1 AAACCGTTACCCTTACTGAGTAA       | miRNA | miR-451 |
| t0077313 | 22 | 1 AAACCGTTAGCATTATTGAGTT        | miRNA | miR-451 |
| t0077318 | 23 | 1 AAACAGTTACAATTACTGAGTTT       | miRNA | miR-451 |
| t0077391 | 27 | 1 AAACCGTTACCATTACTGAGTCCGGGG   | miRNA | miR-451 |
| t0077402 | 21 | 1 AAAGTTACCATTACTGAGTTT         | miRNA | miR-451 |
| t0077451 | 22 | 1 AAACCGTCACCATTACTGCGTT        | miRNA | miR-451 |
| t0077927 | 22 | 1 AAACCGTTATCATTATTGAGTT        | miRNA | miR-451 |
| t0078294 | 21 | 1 AAACCGTTAACATTACTGAGT         | miRNA | miR-451 |
| t0078820 | 29 | 1 AAACCGTTACCATTACTGAGTTGGGGGAC | miRNA | miR-451 |
| t0078938 | 20 | 1 AAACCGTTACCACTACCGAG          | miRNA | miR-451 |
| t0079152 | 26 | 1 AAACCGTTGCCATTACTGAGTTTAGT    | miRNA | miR-451 |
| t0079259 | 29 | 1 AAACCGTTACCATTACTGAGTTCGTGCT  | miRNA | miR-451 |
| t0079399 | 23 | 1 AAACCGTTACCATTACTGACTAA       | miRNA | miR-451 |
| t0079430 | 22 | 1 AAATCGTTACAATTACTGAGTT        | miRNA | miR-451 |
| t0079453 | 30 | 1 AAACCGTTACCATTACTGAGGTCGGCACC | miRNA | miR-451 |
| t0079643 | 20 | 1 AAACCTTTACCATTACTGCG          | miRNA | miR-451 |
| t0079885 | 25 | 1 AAACCGTTACCATTACTGAGTTTGG     | miRNA | miR-451 |
| t0079938 | 21 | 1 AAACCGTTACCATTAGTGGGT         | miRNA | miR-451 |
| t0079968 | 22 | 1 AAAACGTTACCATTAATGAGTT        | miRNA | miR-451 |
| t0080118 | 23 | 1 AAACCGTTAACATTACTGAGTGT       | miRNA | miR-451 |
| t0080335 | 20 | 1 AAACCGTTACCATTAATAAG          | miRNA | miR-451 |
| t0080493 | 22 | 1 AAACCGTTACCCTTACTCAGTT        | miRNA | miR-451 |
| t0080570 | 22 | 1 AAACCGTTACTATTACTTAGTT        | miRNA | miR-451 |
| t0080591 | 22 | 1 AAGCCTTACCATTACTGAGTTT        | miRNA | miR-451 |
| t0080660 | 20 | 1 AAACCGTTAACATTACTGGG          | miRNA | miR-451 |
| t0080730 | 22 | 1 AAACCGTTACAATTAATGAGTT        | miRNA | miR-451 |
| t0080741 | 19 | 1 AAATCGTTAACATTACTGA           | miRNA | miR-451 |
| t0080813 | 19 | 1 AACCGTTACCATTACTGCG           | miRNA | miR-451 |
| t0080814 | 25 | 1 AAACCGTTACCATTACTGTGTTTAG     | miRNA | miR-451 |
| t0080831 | 21 | 1 AAACCGTTACCATTACTTATT         | miRNA | miR-451 |
| t0080893 | 20 | 1 AAACCGATAACATTACTGAG          | miRNA | miR-451 |
| t0081170 | 28 | 1 AAACCGTTACCATTACTGAATTGCCCGG  | miRNA | miR-451 |
| t0081235 | 20 | 1 AAACCTTCACCATTACTGAG          | miRNA | miR-451 |
| t0081294 | 21 | 1 AAACCGTTAACAATACTGAGT         | miRNA | miR-451 |
| t0081785 | 23 | 1 GAACCGTTACCATTACTGAGTAA       | miRNA | miR-451 |
| t0081825 | 24 | 1 AAACCGTCACCATTACTGAGTTTA      | miRNA | miR-451 |
| t0081833 | 22 | 1 AAACCTTTACCATTACTGAGAT        | miRNA | miR-451 |
| t0081852 | 22 | 1 AAACCTTTACCATTCTGAGTT         | miRNA | miR-451 |
| t0082339 | 22 | 1 AAACAGTTACCATTCTGAGTT         | miRNA | miR-451 |
| t0082566 | 23 | 1 AAACCTTCACCATTACTGAGTTT       | miRNA | miR-451 |
| t0082634 | 22 | 1 AACCGTTACCATCACTGAGTTT        | miRNA | miR-451 |
| t0082751 | 21 | 1 AAACCGTTACCATTAGTAAGT         | miRNA | miR-451 |
| t0083007 | 22 | 1 AAACCTTTACCATTACTGAGGT        | miRNA | miR-451 |

|          |    |                             |       |          |
|----------|----|-----------------------------|-------|----------|
| t0083021 | 23 | 1 AAACCGTTACCATTCTGGGTTT    | miRNA | miR-451  |
| t0083189 | 21 | 1 AAACCGTTCCCACTACTGAGT     | miRNA | miR-451  |
| t0083341 | 20 | 1 AAACCGTTACCATAAATGAG      | miRNA | miR-451  |
| t0083664 | 21 | 1 AAACCGTTACAATTAATGAGT     | miRNA | miR-451  |
| t0083820 | 24 | 1 AAAGCTTTACCATTACTGAGTTTA  | miRNA | miR-451  |
| t0083958 | 21 | 1 AAACCGTTACCATTCTGCGT      | miRNA | miR-451  |
| t0084017 | 25 | 1 AAACCGTTACCATTACTGCTTTTAG | miRNA | miR-451  |
| t0084766 | 22 | 1 AAACCGTTACCATTCTTAGTT     | miRNA | miR-451  |
| t0084860 | 19 | 1 AAACCGTAACCATTACTGA       | miRNA | miR-451  |
| t0084936 | 22 | 1 AAACAGTTACTATTACTGAGTT    | miRNA | miR-451  |
| t0084942 | 23 | 1 AAACCGTTAGCATTATTGAGTTT   | miRNA | miR-451  |
| t0084974 | 22 | 1 AAACCGTTAACATTACTTAGTT    | miRNA | miR-451  |
| t0085262 | 22 | 1 AAACCTTTAGCATTACTGAGTT    | miRNA | miR-451  |
| t0085502 | 20 | 1 AAACCGTTATCATTATTGAG      | miRNA | miR-451  |
| t0085587 | 20 | 1 AAACCGTTGCCATTATTGAG      | miRNA | miR-451  |
| t0085624 | 20 | 1 GAACCTTTACCATTACTGAG      | miRNA | miR-451  |
| t0086021 | 21 | 1 AAAACGTTACCATTATTGAGT     | miRNA | miR-451  |
| t0086130 | 22 | 1 GAACCTTTACCATTACTGAGTT    | miRNA | miR-451  |
| t0086356 | 23 | 1 AAACCGTTACCGTTATTGAGTTT   | miRNA | miR-451  |
| t0086638 | 19 | 1 AAACCGTTACCCTTACTGA       | miRNA | miR-451  |
| t0086923 | 25 | 1 AAACCGTTACCATTACTGAGTTTTG | miRNA | miR-451  |
| t0087239 | 19 | 1 AAACCGTTACGATTACTGA       | miRNA | miR-451  |
| t0087280 | 22 | 1 AAACCGTTACCAATACTGAGGT    | miRNA | miR-451  |
| t0087333 | 22 | 1 AAACCGTTATCATTAAATGAGTT   | miRNA | miR-451  |
| t0087463 | 22 | 1 AACCCGTTACCATTACTGCGTT    | miRNA | miR-451  |
| t0087571 | 23 | 1 AAACCGGTACCATTACTGAGTTA   | miRNA | miR-451  |
| t0087712 | 22 | 1 AAACCGTTAACATTACTGCGTT    | miRNA | miR-451  |
| t0088161 | 22 | 1 AAACCTTACCATTACTAAGTT     | miRNA | miR-451  |
| t0088222 | 19 | 1 AAACCGATAACCATTACTGA      | miRNA | miR-451  |
| t0088236 | 20 | 1 AAACCGTAACCATTACTTAG      | miRNA | miR-451  |
| t0088273 | 21 | 1 AAACCTTTACCATTACTCAGT     | miRNA | miR-451  |
| t0088314 | 21 | 1 AAACCGTTATCATTATTGAGT     | miRNA | miR-451  |
| t0088477 | 21 | 1 AAACCGTTAACATTACTAAGT     | miRNA | miR-451  |
| t0088760 | 23 | 1 AAATCGTTACCATTACTGAGTTG   | miRNA | miR-451  |
| t0088863 | 21 | 1 AAACCGTTCCCACTACTGCGT     | miRNA | miR-451  |
| t0089329 | 22 | 1 AAACACTTACCATTACTGAGTT    | miRNA | miR-451  |
| t0089384 | 23 | 1 CAACCGTTACAATTACTGAGTTT   | miRNA | miR-451  |
| t0089400 | 21 | 1 GAACCTTTACCATTACTGAGT     | miRNA | miR-451  |
| t0089552 | 23 | 1 AAACCGTTACCATTTTTGAGTTT   | miRNA | miR-451  |
| t0089598 | 20 | 1 AACCGTTACCATTACTGCGT      | miRNA | miR-451  |
| t0090022 | 21 | 1 AAACCGTGACCATTACTGAGT     | miRNA | miR-451  |
| t0090068 | 23 | 1 AAAACGTTACCATTAATGAGTTT   | miRNA | miR-451  |
| t0090323 | 23 | 1 AAACCGTTAACATTACTGAGTTA   | miRNA | miR-451  |
| t0090592 | 22 | 1 AAACCGTTACCATCACTTAGTT    | miRNA | miR-451  |
| t0091172 | 22 | 1 AAAACGTTAACATTACTGAGTT    | miRNA | miR-451  |
| t0091295 | 21 | 1 AAGCCGTTACCATTACTTAGT     | miRNA | miR-451  |
| t0091736 | 23 | 1 AAACCGTTACCATTACTGCGTTA   | miRNA | miR-451  |
| t0091792 | 24 | 1 AAACCGTTAACATTAGTGAGTTTA  | miRNA | miR-451  |
| t0091941 | 24 | 1 TTTTTCGATGTGTTCTAATGATC   | miRNA | miR-450a |
| t0092006 | 21 | 1 TTCGGGGCCTGGGCGCGGCGA     | miRNA | miR-4508 |
| t0092038 | 21 | 1 TTCGGAGTCTGGGAGCGGCGA     | miRNA | miR-4508 |
| t0092147 | 19 | 1 TTCGGGGTCTGAGCGCGGA       | miRNA | miR-4508 |
| t0092358 | 21 | 1 TTCGGGGTCTGAGCGCGGCGA     | miRNA | miR-4508 |
| t0092544 | 23 | 1 TTCGGGGTCTGGGAGCGGCGAGA   | miRNA | miR-4508 |
| t0092566 | 23 | 1 TTCGGGGTATGGGCGCGGCGAAT   | miRNA | miR-4508 |
| t0092594 | 20 | 1 TTCGGGGCCTGGGCGCGGCG      | miRNA | miR-4508 |
| t0092673 | 23 | 1 TTCGGGGTCTGGGCGCAGCGAAT   | miRNA | miR-4508 |
| t0092757 | 21 | 1 TTCGGGGTCCGGGCGCGGCGA     | miRNA | miR-4508 |

|          |    |                                 |       |           |
|----------|----|---------------------------------|-------|-----------|
| t0092822 | 20 | 1 TTCGGGGTCTGAGCGCGGCG          | miRNA | miR-4508  |
| t0092994 | 23 | 1 TTCGGGGGCTGGGCGCGGCGAGA       | miRNA | miR-4508  |
| t0093265 | 21 | 1 CGACCGGCTCCCGGACGGCTG         | miRNA | miR-4497  |
| t0064171 | 21 | 1 TGGGGCTAGTGATGCAGGAAG         | miRNA | miR-4489  |
| t0041247 | 21 | 1 TGGGGCTAGCGATGCAGGACG         | miRNA | miR-4489  |
| t0045534 | 22 | 1 GCTCCCTCTAAGGTCGCTCGGA        | miRNA | miR-4469  |
| t0060450 | 21 | 1 TGGCGGCGGTAGTTATGGGAT         | miRNA | miR-4467  |
| t0067446 | 21 | 1 TGGCGGCGGGAGTTATGGGCT         | miRNA | miR-4467  |
| t0071883 | 22 | 1 GGGTGCGGGCCGCGGGGGCCT         | miRNA | miR-4466  |
| t0076322 | 20 | 1 GGGTGCGGGCCGCGGGGAC           | miRNA | miR-4466  |
| t0077935 | 21 | 1 CGAATCCGAGTAACGGCACCA         | miRNA | miR-4454  |
| t0079344 | 21 | 1 TCGAATCCGAGTCCCGGAACC         | miRNA | miR-4454  |
| t0082177 | 22 | 1 TCGAATCAGAGTAACGGCACCA        | miRNA | miR-4454  |
| t0091545 | 22 | 1 TCGGATCCGAGTCACGGCACCC        | miRNA | miR-4454  |
| t0093401 | 23 | 1 CTCGAATCCGAGTCACGGCCCCA       | miRNA | miR-4454  |
| t0061569 | 22 | 1 TCGAATCCAAGTCACGGCACCA        | miRNA | miR-4454  |
| t0057076 | 22 | 1 TCGAATCCGAGTAACGGCAACA        | miRNA | miR-4454  |
| t0060413 | 22 | 1 TCGAATCCGAGTAACGGCCCCA        | miRNA | miR-4454  |
| t0054584 | 22 | 1 TCGAATCCGAGTCACGGCACAA        | miRNA | miR-4454  |
| t0061922 | 22 | 1 TCGAATCCGGTTCACGGCACCA        | miRNA | miR-4454  |
| t0089426 | 22 | 1 TCGAATCCGAGTCACAGCACCA        | miRNA | miR-4454  |
| t0081613 | 22 | 1 TCGAATCCGAGTCACGGAACCA        | miRNA | miR-4454  |
| t0087735 | 29 | 1 TTGGTAGAGCTGTAGACTGTAGATCTTTA | miRNA | miR-4451  |
| t0044501 | 28 | 1 GGTAGAGCTGAAGACTGTAGATCTTTAG  | miRNA | miR-4451  |
| t0053363 | 21 | 1 TGGTAGAGCTGAGGACTGTAG         | miRNA | miR-4451  |
| t0056012 | 20 | 1 CTTGGAGGAGATGCGGTTAT          | miRNA | miR-4443  |
| t0068914 | 18 | 1 TTTGGAGGAGATGCGGGT            | miRNA | miR-4443  |
| t0072582 | 18 | 1 TTTGGAGGAGATGAGGTT            | miRNA | miR-4443  |
| t0073529 | 22 | 1 AATTTTGGAGGAGAAGCGGTTA        | miRNA | miR-4443  |
| t0076582 | 25 | 1 CCTGAGCTCACACAGAAAGTAGTTA     | miRNA | miR-4435  |
| t0078226 | 22 | 1 ATGGCTAGAGCTCACACAGAGA        | miRNA | miR-4435  |
| t0081533 | 22 | 1 ACAGGAGTGGGGGGGGGACGT         | miRNA | miR-4433  |
| t0084643 | 20 | 1 AAAGCTGGGCTGAGAGGGCG          | miRNA | miR-4429  |
| t0089115 | 22 | 1 AAAAGCTTGGCTGAGAGGGCGA        | miRNA | miR-4429  |
| t0092470 | 23 | 1 AAAAGTTGGGCTGAGAGGGCGAT       | miRNA | miR-4429  |
| t0043384 | 21 | 1 AAAAGCTAGGCTGAGAGGGCG         | miRNA | miR-4429  |
| t0086300 | 23 | 1 AAAAGCTGGGCTGAGAGGGCGTC       | miRNA | miR-4429  |
| t0090886 | 24 | 1 AAAAGCTGGGCTGAGAGGGCGAAA      | miRNA | miR-4429  |
| t0043063 | 21 | 1 AAAGCTGGGCTGAGAGGGCGA         | miRNA | miR-4429  |
| t0068542 | 22 | 1 GAAAAGCTGGGCTGAGAGGGCG        | miRNA | miR-4429  |
| t0082606 | 23 | 1 AAAAGCTGGGCTGAGAGGGCGAG       | miRNA | miR-4429  |
| t0088765 | 21 | 1 GCAGGCAGAAGGAAGCCGTGG         | miRNA | miR-4419b |
| t0078984 | 19 | 1 TGAGAGAAAGGCAGTTGTT           | miRNA | miR-4306  |
| t0079616 | 21 | 1 TAGAGAGAAAGGCAGTAGTTG         | miRNA | miR-4306  |
| t0044300 | 19 | 1 TGGAGAGAAAGGCAGTCGA           | miRNA | miR-4306  |
| t0050837 | 22 | 1 TGGAGAGAAAGGCAGTGGTTGA        | miRNA | miR-4306  |
| t0061579 | 22 | 1 TGGAGAGAAAGGCAGTAGCTGA        | miRNA | miR-4306  |
| t0062334 | 22 | 1 TGGAGAGAAAGGCAGTAGTTGC        | miRNA | miR-4306  |
| t0065625 | 22 | 1 TGGAGAGAAAGGCAGTACTTGA        | miRNA | miR-4306  |
| t0067595 | 23 | 1 TGGAGAGAAAGGCTGTAGTTGAT       | miRNA | miR-4306  |
| t0074211 | 22 | 1 TCCCACTGCTTCACTTGACTCG        | miRNA | miR-4301  |
| t0077440 | 26 | 1 ACTCCCACTGCTTCCCTTGACTAGCC    | miRNA | miR-4301  |
| t0086523 | 26 | 1 ACTCCCACTGCTTCACTTGCTAGCC     | miRNA | miR-4301  |
| t0090041 | 21 | 1 GCCCACTGCTTCACTTGACTA         | miRNA | miR-4301  |
| t0091669 | 19 | 1 CTCCCACTGATTCACCTTGA          | miRNA | miR-4301  |
| t0050897 | 20 | 1 ACTCTCACTGCTTCACTTGA          | miRNA | miR-4301  |
| t0062615 | 21 | 1 TCCCACTGCTTCACTTGCTA          | miRNA | miR-4301  |
| t0063346 | 20 | 1 AGCTGCATTGTATAGGGCTA          | miRNA | miR-4289  |

|          |    |                             |       |            |
|----------|----|-----------------------------|-------|------------|
| t0063901 | 21 | 1 AGAAGAATTGTACAGGGCTAT     | miRNA | miR-4289   |
| t0065514 | 21 | 1 AGAAGCATTGTAAAGGGCTAT     | miRNA | miR-4289   |
| t0080374 | 21 | 1 AGCTGCATTGTACAGGGCTAT     | miRNA | miR-4289   |
| t0081088 | 19 | 1 AGTAGCATTGTACAGGGTT       | miRNA | miR-4289   |
| t0082393 | 21 | 1 AGTACAGGGCTATCGCAGCAT     | miRNA | miR-4289   |
| t0043528 | 22 | 1 AGAAGCATTGTACAGGGCTCTT    | miRNA | miR-4289   |
| t0045469 | 21 | 1 GGCAGCATTGTACATGGCTAT     | miRNA | miR-4289   |
| t0058193 | 21 | 1 GGCAGCATTGTACAGGGCTAA     | miRNA | miR-4289   |
| t0069549 | 21 | 1 AGTACAGGGCTATAGCCGCAT     | miRNA | miR-4289   |
| t0076126 | 23 | 1 AGAAGCATTGTACAGGGCTATTT   | miRNA | miR-4289   |
| t0077519 | 21 | 1 AGCGGCATTGTATTGGGCTAT     | miRNA | miR-4289   |
| t0084979 | 20 | 1 AGTAGCATTGTACAGGGTTA      | miRNA | miR-4289   |
| t0040746 | 21 | 1 AGTAGCATTGTACAGGGCTAA     | miRNA | miR-4289   |
| t0043458 | 22 | 1 AGAAGCATTGTACAGGGCTAAT    | miRNA | miR-4289   |
| t0043843 | 20 | 1 AGTAGCGTTGTACAGGGCTA      | miRNA | miR-4289   |
| t0044165 | 21 | 1 AGAAGCATCGTACAGGGCTAT     | miRNA | miR-4289   |
| t0045778 | 21 | 1 AACAGCATTGTACAGGGCTAA     | miRNA | miR-4289   |
| t0046431 | 22 | 1 AACAGCATTGTACAGGGCTATT    | miRNA | miR-4289   |
| t0048336 | 20 | 1 AGAAGCATTGTACAGGGCTC      | miRNA | miR-4289   |
| t0049435 | 21 | 1 GGCAGCATTGTACTGGGCTAT     | miRNA | miR-4289   |
| t0051107 | 20 | 1 AGCTGCATTGTACAGGGCTA      | miRNA | miR-4289   |
| t0051442 | 21 | 1 AGCGGCATTGTACAGGGCTAC     | miRNA | miR-4289   |
| t0051922 | 22 | 1 AGGAGGATTGTACAGGGCTATT    | miRNA | miR-4289   |
| t0053870 | 21 | 1 AGTGGCATTGTACAGGGCTAT     | miRNA | miR-4289   |
| t0056915 | 20 | 1 AGAAACATTGTACAGGGCTA      | miRNA | miR-4289   |
| t0058373 | 23 | 1 AACAGCATTGTACAGGGCTATTT   | miRNA | miR-4289   |
| t0060278 | 22 | 1 AGGAGCATTGTACAGGGCTATT    | miRNA | miR-4289   |
| t0061007 | 19 | 1 GGCAGCATTGTACAGGGCT       | miRNA | miR-4289   |
| t0061235 | 20 | 1 GTCAGCATTGTACAGGGCTA      | miRNA | miR-4289   |
| t0062004 | 20 | 1 ATCAGCATTGTCCAGGGCTA      | miRNA | miR-4289   |
| t0062321 | 22 | 1 AGGAGCATTGTACAGGGCTAGT    | miRNA | miR-4289   |
| t0063795 | 22 | 1 ATGACACGATCACTCCCGTTGG    | miRNA | miR-425-5p |
| t0064914 | 23 | 1 ATGACACGATCACTCCCGTTTAG   | miRNA | miR-425-5p |
| t0065480 | 22 | 1 ATGAAACGATCACTCCCGTTGA    | miRNA | miR-425-5p |
| t0067249 | 22 | 1 AATGACACGATCACTCCCGTGG    | miRNA | miR-425    |
| t0067902 | 22 | 1 AATGACACGATCACTCCCGGTG    | miRNA | miR-425    |
| t0070680 | 23 | 1 AATGACACGATCACTCCAGTTGA   | miRNA | miR-425    |
| t0075210 | 22 | 1 AATGACATGATCACTCCCGTTG    | miRNA | miR-425    |
| t0075518 | 23 | 1 AATGATACGATCCCTCCCGTTGA   | miRNA | miR-425    |
| t0075910 | 22 | 1 AATGACACGATAACTCCCGTTG    | miRNA | miR-425    |
| t0077068 | 23 | 1 AATGACACGATTACTCCCGTTGA   | miRNA | miR-425    |
| t0077413 | 23 | 1 AATGACATGATCACTCCCGTTGA   | miRNA | miR-425    |
| t0079875 | 23 | 1 AATGAAACGATCACTCCCGTTGA   | miRNA | miR-425    |
| t0089500 | 22 | 1 AATGACACGATCACTACCGTTG    | miRNA | miR-425    |
| t0044409 | 23 | 1 AATGACCCGATCACTCGCGTTGA   | miRNA | miR-425    |
| t0071887 | 22 | 1 AATGGCACGATCACTCCCGTTG    | miRNA | miR-425    |
| t0077628 | 23 | 1 AATGACACGATCACTCCCGATGA   | miRNA | miR-425    |
| t0043413 | 25 | 1 AATGACACGATCACTTCCGTTGAGA | miRNA | miR-425    |
| t0046197 | 24 | 1 AATGACACGATCACTCCTGTTGAG  | miRNA | miR-425    |
| t0048481 | 21 | 1 AATGACACGATCACTCCCGGT     | miRNA | miR-425    |
| t0048666 | 22 | 1 AATGAAACGATCACTCCCGTTG    | miRNA | miR-425    |
| t0050855 | 23 | 1 AATGACACGATAACTCCCGTTGA   | miRNA | miR-425    |
| t0051557 | 22 | 1 AATGACACGATCATTCCCGTTG    | miRNA | miR-425    |
| t0053804 | 23 | 1 AATGACACGATCACACCCGTTGA   | miRNA | miR-425    |
| t0053952 | 23 | 1 AATGACACGATCGCTCCCGTTGA   | miRNA | miR-425    |
| t0054939 | 23 | 1 AATGACACGATCAATCCCGTTGA   | miRNA | miR-425    |
| t0060733 | 22 | 1 AATGACACGGTCACTCCCGTTG    | miRNA | miR-425    |
| t0061166 | 25 | 1 AATGACACGATCAATCCCGTTGAGA | miRNA | miR-425    |

|          |    |                                |       |            |
|----------|----|--------------------------------|-------|------------|
| t0062194 | 22 | 1 AATGACACGATCACTCCAGTTG       | miRNA | miR-425    |
| t0062333 | 25 | 1 AATGACACGATCATTCCCGTTGAGA    | miRNA | miR-425    |
| t0062348 | 21 | 1 CAAAACGAGAGGGCGCTGCTAT       | miRNA | miR-424*   |
| t0063712 | 21 | 1 CAAAACGTGAGGAGCTGCTAT        | miRNA | miR-424*   |
| t0069757 | 20 | 1 CAAAGCGTGAGGGCGCTGCTA        | miRNA | miR-424*   |
| t0071116 | 20 | 1 CAAAACGAGAGGGCGCTGCTA        | miRNA | miR-424*   |
| t0076274 | 21 | 1 CAGCAGCATTTCATGTTTTGA        | miRNA | miR-424    |
| t0076786 | 19 | 1 CAGCAGCACTTCATGTTTT          | miRNA | miR-424    |
| t0077895 | 21 | 1 CAGCAGCGATTTCATGTTTTGA       | miRNA | miR-424    |
| t0083969 | 21 | 1 CAGCATCAATTCATGTTTTGA        | miRNA | miR-424    |
| t0086752 | 21 | 1 CAGCAGCAATTCATGTTTTCA        | miRNA | miR-424    |
| t0087517 | 21 | 1 CAGCAGCAATTCATGGTTTTGA       | miRNA | miR-424    |
| t0088664 | 21 | 1 CAGCAACAATTCATGTTTTGA        | miRNA | miR-424    |
| t0089607 | 23 | 1 CAGCAGCAATTCATGTTTTGACA      | miRNA | miR-424    |
| t0093282 | 19 | 1 CAGCAGCAAATCATGGTTT          | miRNA | miR-424    |
| t0064067 | 21 | 1 CAGCAGAAATTCATGTTTTGA        | miRNA | miR-424    |
| t0084987 | 21 | 1 CAGCAGTAATTCATGTTTTGA        | miRNA | miR-424    |
| t0089109 | 21 | 1 CAGCAGCAATTCATGTTTTTA        | miRNA | miR-424    |
| t0090199 | 21 | 1 CAGCAGCAATTCATGTTTCGA        | miRNA | miR-424    |
| t0043328 | 21 | 1 CAGCAGCAACTCATGTTTTGA        | miRNA | miR-424    |
| t0043392 | 20 | 1 CAGCAGCATTTCATGTTTTG         | miRNA | miR-424    |
| t0060284 | 23 | 1 TGAGGGGCAGAGTGCCGAGAGTTT     | miRNA | miR-423-5p |
| t0062006 | 21 | 1 TGAGGGGCAGACAGAGAGACT        | miRNA | miR-423-5p |
| t0067022 | 22 | 1 TGAGGGGAAGAGGGCGAGACTT       | miRNA | miR-423-5p |
| t0069771 | 21 | 1 TGAGAGGCAGAGAGTGAGACT        | miRNA | miR-423-5p |
| t0070324 | 23 | 1 TGAGGGGCGGAGCGCGAGACTTT      | miRNA | miR-423-5p |
| t0070587 | 21 | 1 TGAGGGGAAGAGAGCGAGACA        | miRNA | miR-423-5p |
| t0070860 | 22 | 1 TGAGGGGCAGAGAGAGAGACTG       | miRNA | miR-423-5p |
| t0073399 | 23 | 1 TGAGGGGAAGGGAGCGAGACTTT      | miRNA | miR-423-5p |
| t0078537 | 21 | 1 CGAGGGGTAGAGAGCGAGACT        | miRNA | miR-423-5p |
| t0081444 | 23 | 1 TGAGGGGCAGAGGGCGAGACTTG      | miRNA | miR-423-5p |
| t0086192 | 22 | 1 TGAGGGGCAGAGAGCGAGGCCT       | miRNA | miR-423-5p |
| t0086283 | 21 | 1 TAAGGGGCAGAGAGCGAGAAT        | miRNA | miR-423-5p |
| t0088659 | 23 | 1 TGAGGGGTAGACAGCGAGACTTT      | miRNA | miR-423-5p |
| t0041054 | 23 | 1 TGAGGGGCAGAGGGGGAGACTTT      | miRNA | miR-423-5p |
| t0041248 | 21 | 1 TGAGGGGCAGAGAGGGGAGATT       | miRNA | miR-423-5p |
| t0041357 | 21 | 1 TGAGGGACAGAGAGAGAGACT        | miRNA | miR-423-5p |
| t0041392 | 23 | 1 TGAGGGGCATAGAGCTAGACTTT      | miRNA | miR-423-5p |
| t0041394 | 23 | 1 TGATGGGCAGAGGGCGAGACTTT      | miRNA | miR-423-5p |
| t0041463 | 23 | 1 TGAGAGGCAGATAGCGAGACTTT      | miRNA | miR-423-5p |
| t0041696 | 23 | 1 TGAAGGGCAGAGAGCGAGATTTT      | miRNA | miR-423-5p |
| t0041742 | 22 | 1 TGAGGGGTAGAGACCGAGACTT       | miRNA | miR-423-5p |
| t0041852 | 23 | 1 TGAGGGGCAGAGACCGAGGCTTT      | miRNA | miR-423-5p |
| t0041973 | 23 | 1 CGAGGGGCAGAGAGCGAGCCTTT      | miRNA | miR-423-5p |
| t0042100 | 22 | 1 TGAGGGGCAGAGAGCGAGCATT       | miRNA | miR-423-5p |
| t0042209 | 42 | 1 TGAGGGGCAGAGAGCGAGCCTTTGTGTG | miRNA | miR-423-5p |
| t0042468 | 21 | 1 TTAGGGACAGAGAGCGAGACT        | miRNA | miR-423-5p |
| t0042650 | 23 | 1 TGAGGGGAAGAGAGCGAGCCTTT      | miRNA | miR-423-5p |
| t0042671 | 22 | 1 TGGGGGCAGAGAGCTAGACTT        | miRNA | miR-423-5p |
| t0042709 | 22 | 1 TGAGGGGCAGAAAGAGAGACTT       | miRNA | miR-423-5p |
| t0043087 | 23 | 1 TGAGGGGCAAAGGGCGAGACTTT      | miRNA | miR-423-5p |
| t0043194 | 24 | 1 TGAGGGACAGATAGCCGAGACTTTT    | miRNA | miR-423-5p |
| t0043639 | 21 | 1 TGAGGGGCAGAGAGCGGGATT        | miRNA | miR-423-5p |
| t0043682 | 24 | 1 TGAGGGCCAGAGAGCGAGACTTTT     | miRNA | miR-423-5p |
| t0043740 | 19 | 1 TGAGGGGCAGATAACGAGA          | miRNA | miR-423-5p |
| t0043991 | 24 | 1 TGAGGGGCTGAGAGCGAGACTTTT     | miRNA | miR-423-5p |
| t0044238 | 23 | 1 TTAGGGGCAGAGAGCGAGCCTTT      | miRNA | miR-423-5p |
| t0044346 | 18 | 1 TGAGGGGCAGAGAGGGAG           | miRNA | miR-423-5p |

|          |    |                               |       |            |
|----------|----|-------------------------------|-------|------------|
| t0044348 | 23 | 1 TGAGGGGAAAAGAGCGAGACTTT     | miRNA | miR-423-5p |
| t0044383 | 21 | 1 AGGGGCAGAGAGCGAGCCTTT       | miRNA | miR-423-5p |
| t0044787 | 21 | 1 TGAGTGGCAGAGAGAGAGACT       | miRNA | miR-423-5p |
| t0044814 | 24 | 1 TGAGGGGCAGAGAGCGAGACTTCA    | miRNA | miR-423-5p |
| t0044915 | 21 | 1 AAGGGCAGAGAGCGAGACTTT       | miRNA | miR-423-5p |
| t0044930 | 23 | 1 TGATGGGCAGAGAGAGAGACTTT     | miRNA | miR-423-5p |
| t0045012 | 27 | 1 TGAGGGGCAGAGAGCGAGCCTTTAGGT | miRNA | miR-423-5p |
| t0045311 | 22 | 1 TCAGGGGCAGAGAGAGAGACTT      | miRNA | miR-423-5p |
| t0045407 | 24 | 1 TGAGGGGCAGAGCGCGAGACTTAT    | miRNA | miR-423-5p |
| t0045483 | 24 | 1 TTAGGGGCAGAGAGCGAGACTTTT    | miRNA | miR-423-5p |
| t0045488 | 19 | 1 TGAGGGGCAGAGAGCCAGA         | miRNA | miR-423-5p |
| t0045529 | 22 | 1 TGAGGGGAAGAGAGTGAGACTT      | miRNA | miR-423-5p |
| t0045568 | 21 | 1 TGAGGGGCAGAGAGTGGGACT       | miRNA | miR-423-5p |
| t0045596 | 23 | 1 TGAGGGGCAGATAGAGAGACTTT     | miRNA | miR-423-5p |
| t0045901 | 24 | 1 TGAGGGGCAGAGAGCGAGAAGTTT    | miRNA | miR-423-5p |
| t0046181 | 23 | 1 TGACGGGCAAAGAGCGAGACTTT     | miRNA | miR-423-5p |
| t0046203 | 23 | 1 TAAGGGGCAGAGAGCGAGCCTTT     | miRNA | miR-423-5p |
| t0046238 | 21 | 1 TGAGTGGCAGAGAGCGGGACT       | miRNA | miR-423-5p |
| t0046271 | 23 | 1 TGGGGGGCAGAGAGCGGGACTTT     | miRNA | miR-423-5p |
| t0046275 | 24 | 1 TGAGGGGCAGAGAGCGAGTCTTTT    | miRNA | miR-423-5p |
| t0046787 | 25 | 1 TGAGGGGCAGAGAGTGAGACTTTTT   | miRNA | miR-423-5p |
| t0047028 | 24 | 1 TGAGGGGCAGAGAGCGAGAGTTAA    | miRNA | miR-423-5p |
| t0047267 | 23 | 1 TCAGGGGCAGAGAGCGAGAATTT     | miRNA | miR-423-5p |
| t0047760 | 21 | 1 AGAGGGGCAGAGAGCGAGGCT       | miRNA | miR-423-5p |
| t0047927 | 24 | 1 TGAGGGGCAGAGAGCCAGAATTTT    | miRNA | miR-423-5p |
| t0047934 | 22 | 1 TTTGAGGGGCAGAGAGCGAGCC      | miRNA | miR-423-5p |
| t0047951 | 22 | 1 TGAGGAGCAGAGCGCGAGACTT      | miRNA | miR-423-5p |
| t0048043 | 23 | 1 TGAGGGGCAGAGAAAGAGACTTT     | miRNA | miR-423-5p |
| t0048182 | 23 | 1 TGATAGGCAGAGAGCGAGACTTT     | miRNA | miR-423-5p |
| t0048482 | 21 | 1 TGAGGGGCAGAGAGAGAGTCT       | miRNA | miR-423-5p |
| t0048578 | 22 | 1 AGGGGCAGAGAGCGAGGCTTTT      | miRNA | miR-423-5p |
| t0048854 | 22 | 1 TGAGGGTCAGAGAGCGAGACTC      | miRNA | miR-423-5p |
| t0049036 | 23 | 1 TGAGGGGCAGAGATCGAGACTCT     | miRNA | miR-423-5p |
| t0049079 | 23 | 1 TGAGGGGCAGGGAGCGAGCCTTT     | miRNA | miR-423-5p |
| t0049115 | 22 | 1 TGAGGGGAAGAGAGCGACACTT      | miRNA | miR-423-5p |
| t0049262 | 24 | 1 TGAGGGGCAGAGGGCGAGACTTTA    | miRNA | miR-423-5p |
| t0049558 | 21 | 1 TGAGGGGCAGATAGGGGAGACT      | miRNA | miR-423-5p |
| t0049936 | 23 | 1 TGAGGGGCAGAGAGCGTGACTTA     | miRNA | miR-423-5p |
| t0050114 | 23 | 1 TGAGGGGCAGAGACCGAGACTTG     | miRNA | miR-423-5p |
| t0050187 | 23 | 1 TGGGGGGCAGAGAGCGAGAATTT     | miRNA | miR-423-5p |
| t0050221 | 21 | 1 TGAGGGGAAGACAGCGAGACT       | miRNA | miR-423-5p |
| t0050248 | 21 | 1 AGGGGCAGAGAGCGAGAATTT       | miRNA | miR-423-5p |
| t0050401 | 21 | 1 TGAGGGGCAGAGAGCCAGACA       | miRNA | miR-423-5p |
| t0050575 | 24 | 1 TGTGGGGCAGAGAGCGAGACTTTT    | miRNA | miR-423-5p |
| t0050637 | 19 | 1 TGAGGGGCAGAGTGCGAGA         | miRNA | miR-423-5p |
| t0050712 | 23 | 1 TGAGGGGAAGATAGCGAGACTTT     | miRNA | miR-423-5p |
| t0050815 | 21 | 1 TGAGGGGGAGAGAGCTAGACT       | miRNA | miR-423-5p |
| t0051159 | 21 | 1 TGAGTGGCAGAGAGCAAGACT       | miRNA | miR-423-5p |
| t0051169 | 23 | 1 TGTGGGGCAGAGAGCGAGACTTA     | miRNA | miR-423-5p |
| t0051178 | 21 | 1 TGAGGGGCAGATGGCGAGACT       | miRNA | miR-423-5p |
| t0051308 | 23 | 1 TGAGGGGCAGAGAGCGAGGTTTT     | miRNA | miR-423-5p |
| t0051405 | 23 | 1 TGAGAGGCAGAGACCGAGACTTT     | miRNA | miR-423-5p |
| t0051543 | 23 | 1 CGAAGGGCAGAGAGCGAGACTTT     | miRNA | miR-423-5p |
| t0051559 | 22 | 1 TGACGGGCAGATAGCGAGACTT      | miRNA | miR-423-5p |
| t0051670 | 21 | 1 TGAGGGGCAGATAGCGAGTCT       | miRNA | miR-423-5p |
| t0051748 | 22 | 1 TTTGAGGGGCCGAGAGCGAGAC      | miRNA | miR-423-5p |
| t0052038 | 24 | 1 TGAGGGGCAGAGCGCGAGAATTTT    | miRNA | miR-423-5p |
| t0052053 | 19 | 1 TGAGGGGCAGGGAGCGAGA         | miRNA | miR-423-5p |

|          |    |                                 |       |            |
|----------|----|---------------------------------|-------|------------|
| t0052488 | 22 | 1 TGAGGGGCAGAGGGCGAGAATT        | miRNA | miR-423-5p |
| t0052665 | 24 | 1 TGAGGGGCAGAGGGCGAGACTTAT      | miRNA | miR-423-5p |
| t0052756 | 23 | 1 TAAGGGGCAGAGAGCGAGATTTT       | miRNA | miR-423-5p |
| t0052839 | 20 | 1 TGAGGGACAGAGAGCGAGAC          | miRNA | miR-423-5p |
| t0053314 | 23 | 1 TGGGGGGCAGAGAGCGAGACATT       | miRNA | miR-423-5p |
| t0053473 | 22 | 1 TGAGGGGCAGAGAGCGAGGCTA        | miRNA | miR-423-5p |
| t0053872 | 22 | 1 AGGAGCAGAGAGCGAGACTTTT        | miRNA | miR-423-5p |
| t0054116 | 21 | 1 TTGAGGGGCAGAGCGCGAGAC         | miRNA | miR-423-5p |
| t0054235 | 42 | 1 TGAGGGGCAGAGAGCGAGACTTTTCGTTT | miRNA | miR-423-5p |
| t0054390 | 23 | 1 TGACGGGCAGAGAGCGAGACTTA       | miRNA | miR-423-5p |
| t0054621 | 22 | 1 TGAGCGACAGAGAGCGAGACTT        | miRNA | miR-423-5p |
| t0054965 | 20 | 1 TAGGGGCAGAGAGAGAGACT          | miRNA | miR-423-5p |
| t0055396 | 20 | 1 AGGGGCAGAGGGCGAGACTT          | miRNA | miR-423-5p |
| t0055419 | 21 | 1 TGAGGGGCAGAGAGAGAGCCT         | miRNA | miR-423-5p |
| t0055994 | 23 | 1 TGAGGGGCAGACAGCGAGCCTTT       | miRNA | miR-423-5p |
| t0056297 | 21 | 1 TGAATGGCAGAGAGCGAGACT         | miRNA | miR-423-5p |
| t0056464 | 23 | 1 TGGGGGGCAGAGAGCGAGATTTT       | miRNA | miR-423-5p |
| t0056558 | 21 | 1 TGAGGGGAAGAGAGCGGGACT         | miRNA | miR-423-5p |
| t0056674 | 22 | 1 AGGGGCAGAGAACGAGACTTTT        | miRNA | miR-423-5p |
| t0056761 | 24 | 1 TGAGGGGAAGAGAGCGAGACTTTA      | miRNA | miR-423-5p |
| t0057144 | 22 | 1 TGAGAGGCAGAGAGCGAGAATT        | miRNA | miR-423-5p |
| t0057629 | 21 | 1 AGGGGCAGAGAGGGAGACTTT         | miRNA | miR-423-5p |
| t0058039 | 24 | 1 TGAGGGGAAGAGAGCGAGAATTTA      | miRNA | miR-423-5p |
| t0058061 | 24 | 1 TGGGGGGCAGAGAGCGAGACTTGA      | miRNA | miR-423-5p |
| t0058149 | 23 | 1 TGAGCAGCAGAGAGCGAGACTTT       | miRNA | miR-423-5p |
| t0058352 | 21 | 1 TGAGGGGCAGAGGCCGAGACT         | miRNA | miR-423-5p |
| t0058677 | 22 | 1 GGGGGGCAGAGAGCGAGACTTT        | miRNA | miR-423-5p |
| t0058911 | 23 | 1 TGAGGGGAAGAGGGCGAGACTTT       | miRNA | miR-423-5p |
| t0059125 | 23 | 1 TGAGGGGAAGAAAGCGAGACTTT       | miRNA | miR-423-5p |
| t0059157 | 22 | 1 TGAGGGGCGAGAGCGAGACTA         | miRNA | miR-423-5p |
| t0059251 | 20 | 1 TGAGGAGCAGAGAGAGAGAC          | miRNA | miR-423-5p |
| t0059292 | 23 | 1 TGAGGGGCAGAGAGCGAGACATA       | miRNA | miR-423-5p |
| t0059300 | 21 | 1 TGAGGGGCAGAGAGAGAGACT         | miRNA | miR-423-5p |
| t0059387 | 22 | 1 TGAGGGGCAGAGAGCGAGGTTT        | miRNA | miR-423-5p |
| t0059742 | 23 | 1 TGAGGGGCAGAGCGCGAGGCTTT       | miRNA | miR-423-5p |
| t0059760 | 23 | 1 TGAGGGGCAGATAGCGAGGCTTT       | miRNA | miR-423-5p |
| t0059868 | 21 | 1 TGAGGGACAGATAGCGAGACT         | miRNA | miR-423-5p |
| t0059911 | 23 | 1 TGAGGGGCAGACAGCAAGACTTT       | miRNA | miR-423-5p |
| t0059973 | 22 | 1 TGAGGGGAAGAGAGCGAGACTA        | miRNA | miR-423-5p |
| t0060064 | 23 | 1 TGAGGGGCAGAGAGGGATACTTT       | miRNA | miR-423-5p |
| t0060126 | 22 | 1 GAGGGGAAGAGAGCGAGACTTT        | miRNA | miR-423-5p |
| t0060152 | 24 | 1 CTGAGGGGCAGAGAGCGAGCCTTT      | miRNA | miR-423-5p |
| t0060177 | 20 | 1 GAGGGGAAGAGAGCGAGACT          | miRNA | miR-423-5p |
| t0060448 | 21 | 1 TGAGGGGCAGAGAGCGGGAAT         | miRNA | miR-423-5p |
| t0060465 | 23 | 1 TGAGCGGCAGAGAGCGGGACTTT       | miRNA | miR-423-5p |
| t0060515 | 21 | 1 TGAAGGGCAGAGAGCGAGAAT         | miRNA | miR-423-5p |
| t0060555 | 22 | 1 TCGGGGCAGAGGGCGAGACTT         | miRNA | miR-423-5p |
| t0060676 | 24 | 1 TGAGGGGCAGAGAGCGGGACTTAT      | miRNA | miR-423-5p |
| t0060700 | 23 | 1 TGAGGGGCAGGGAGCGACACTTT       | miRNA | miR-423-5p |
| t0060722 | 23 | 1 TGAGGGGCGAGAGCGAGAATTT        | miRNA | miR-423-5p |
| t0060728 | 23 | 1 TGAGGGGCAGAGGGCAAGACTTT       | miRNA | miR-423-5p |
| t0060791 | 22 | 1 TGAGGGGCAGAGAGCCAGATTT        | miRNA | miR-423-5p |
| t0061191 | 21 | 1 TGGGGGGCATAGAGCGAGACT         | miRNA | miR-423-5p |
| t0061345 | 22 | 1 TGAGGGGCAGAGGGCTAGACTT        | miRNA | miR-423-5p |
| t0061535 | 23 | 1 TGAGGGGAAGAGAGCTAGACTTT       | miRNA | miR-423-5p |
| t0061544 | 23 | 1 TGAGGAGCAGAGAGCTAGACTTT       | miRNA | miR-423-5p |
| t0061595 | 21 | 1 TGAGGGGCAGCGAGAGAGACT         | miRNA | miR-423-5p |
| t0061684 | 23 | 1 TGAGGGGCAGCGAGCGAGACCTT       | miRNA | miR-423-5p |



|          |    |                            |       |            |
|----------|----|----------------------------|-------|------------|
| t0061696 | 22 | 1 TGAGGGACAGAGAGCTAGACTT   | miRNA | miR-423-5p |
| t0061805 | 22 | 1 TGAGGGGCAGCCAGCGAGACTT   | miRNA | miR-423-5p |
| t0062061 | 21 | 1 TGAGGGGCAGCGAGCGAGAAT    | miRNA | miR-423-5p |
| t0062071 | 23 | 1 TGAGGGGGAGAGAGAGAGACTTT  | miRNA | miR-423-5p |
| t0062377 | 22 | 1 TGAGGGGAAGAGAGCGAGATTT   | miRNA | miR-423-5p |
| t0062513 | 24 | 1 TGAGGGGCAGAGAGCGAGCCTTAT | miRNA | miR-423-5p |
| t0063198 | 20 | 1 AGGCGCAGAGAGCGAGACTT     | miRNA | miR-423-5p |
| t0063291 | 21 | 1 TGAGTGGCAGAGAGCGAGAAT    | miRNA | miR-423-5p |
| t0063315 | 23 | 1 TGAGGTGCAGAGAGCGGGACTTT  | miRNA | miR-423-5p |
| t0063363 | 23 | 1 TAAAGGGCAGAGAGCGAGACTTT  | miRNA | miR-423-5p |
| t0063598 | 21 | 1 TGAGGGGCAGAGAGAGCGACT    | miRNA | miR-423-5p |
| t0063822 | 23 | 1 TGAGGGGAAGTGAGCGAGACTTT  | miRNA | miR-423-5p |
| t0064249 | 23 | 1 TGATGGGTAGAGAGCGAGACTTT  | miRNA | miR-423-5p |
| t0064274 | 22 | 1 TGATGGGCAGGGAGCGAGACTT   | miRNA | miR-423-5p |
| t0064436 | 22 | 1 TAAGGGCAGAGAGCGAGACTTT   | miRNA | miR-423-5p |
| t0064481 | 23 | 1 CGAGGGGCAGAGAGTGAGACTTT  | miRNA | miR-423-5p |
| t0064691 | 21 | 1 TCGGGGCAGAGAGCGAGACA     | miRNA | miR-423-5p |
| t0064980 | 23 | 1 TGAGGGGCAGAGAGCAAGATTTT  | miRNA | miR-423-5p |
| t0064992 | 23 | 1 TGAGGGGCAGAGTGCAGAAATTT  | miRNA | miR-423-5p |
| t0065009 | 22 | 1 TAAGGGCAGAGAGCGAGACTA    | miRNA | miR-423-5p |
| t0065121 | 19 | 1 TGAGGGCGGAGAGAGAGA       | miRNA | miR-423-5p |
| t0065246 | 22 | 1 TGAGTGGCAGAGAGAGAGACTT   | miRNA | miR-423-5p |
| t0065774 | 23 | 1 TGAGGGGAAGAGAGCGAGACTTG  | miRNA | miR-423-5p |
| t0065778 | 23 | 1 TGAGGGGCAGAGAGCTAGAATTT  | miRNA | miR-423-5p |
| t0065826 | 21 | 1 TGAGGGGCAGAGCGAGAGACT    | miRNA | miR-423-5p |
| t0065903 | 22 | 1 TGAGGGGTAGAGAGAGAGACTT   | miRNA | miR-423-5p |
| t0065964 | 23 | 1 TGAGGGTCAGATAGCGAGACTTT  | miRNA | miR-423-5p |
| t0066025 | 21 | 1 TGAGGGGCAGGGAGCGAGATT    | miRNA | miR-423-5p |
| t0066029 | 21 | 1 TGAGGGGCAGAGAGCAAGACA    | miRNA | miR-423-5p |
| t0066111 | 23 | 1 TGAGGGGCGGAGAGCGAGCCTTT  | miRNA | miR-423-5p |
| t0066189 | 21 | 1 TGAGGGGTAGAGGGCGAGACT    | miRNA | miR-423-5p |
| t0066240 | 23 | 1 TGAGGGGCAGAGAGACAGACTTT  | miRNA | miR-423-5p |
| t0066356 | 22 | 1 GGAGGGGCAGAGAACGAGACTT   | miRNA | miR-423-5p |
| t0066464 | 21 | 1 TGAGGGGAAGAGAGCGAGAGT    | miRNA | miR-423-5p |
| t0066766 | 23 | 1 CGAGGGGCAGAGAGAGAGACTTT  | miRNA | miR-423-5p |
| t0067013 | 23 | 1 TGAGGGCCAGAGAGCGAGAATTT  | miRNA | miR-423-5p |
| t0067287 | 23 | 1 TGAGGGCCAGAGAGCGAGACTTA  | miRNA | miR-423-5p |
| t0067552 | 23 | 1 TGAGGGGCAGAGAGCTAGACCTT  | miRNA | miR-423-5p |
| t0067880 | 20 | 1 TGGGGGCAGAGAGCGAGAC      | miRNA | miR-423-5p |
| t0068009 | 22 | 1 GAGGAGCAGAGAGCGAGACTTA   | miRNA | miR-423-5p |
| t0068277 | 23 | 1 TGAGGGCCAGATAGCGAGACTTT  | miRNA | miR-423-5p |
| t0068308 | 23 | 1 TGAGGGGTAGAGAGCGAGATTTT  | miRNA | miR-423-5p |
| t0068513 | 23 | 1 TGAGGGGAAGAGAGCGAGACTCT  | miRNA | miR-423-5p |
| t0068517 | 23 | 1 CGAGGGGCAGAGACCGAGACTTT  | miRNA | miR-423-5p |
| t0068634 | 23 | 1 TGAGGGGTAGAGAGAGAGACTTT  | miRNA | miR-423-5p |
| t0068723 | 23 | 1 TGAGGGGGAGAGAGCGAGACTTG  | miRNA | miR-423-5p |
| t0068819 | 20 | 1 TGAGGCAGAGAGCGAGACTT     | miRNA | miR-423-5p |
| t0068862 | 24 | 1 TGAGGGGCAGAGAGTGAGACTTAA | miRNA | miR-423-5p |
| t0069041 | 21 | 1 TGAGGGGCGGAGGGCGAGACT    | miRNA | miR-423-5p |
| t0069207 | 22 | 1 GAGGGGCAGAGAGCGAGCCTTA   | miRNA | miR-423-5p |
| t0069422 | 23 | 1 TGAGGGGCGGAGAGCGAGTCTTT  | miRNA | miR-423-5p |
| t0069530 | 22 | 1 TGAGAGGGAGAGAGCGAGACTT   | miRNA | miR-423-5p |
| t0069618 | 23 | 1 TGAGGGGCAGAGAGCAAGCCTTT  | miRNA | miR-423-5p |
| t0069764 | 24 | 1 TGAGGGGCAGAGGGCGAGACTTAG | miRNA | miR-423-5p |
| t0069811 | 23 | 1 TGAGGGGCTGAGAGAGAGACTTT  | miRNA | miR-423-5p |
| t0069854 | 21 | 1 TGAGTGGGAGAGAGCGAGACT    | miRNA | miR-423-5p |
| t0069933 | 21 | 1 TGAGGGGCAGAGAGCTAGAAT    | miRNA | miR-423-5p |
| t0070227 | 23 | 1 TGAGGGGCATAGAGCAAGACTTT  | miRNA | miR-423-5p |

|          |    |                               |       |            |
|----------|----|-------------------------------|-------|------------|
| t0070263 | 23 | 1 TGAGGGGCAGAGAGTGAGGCTTT     | miRNA | miR-423-5p |
| t0070349 | 21 | 1 TGAGGGGCAGAGAGGGAGACA       | miRNA | miR-423-5p |
| t0070510 | 23 | 1 TAAGGGGCGGAGAGCGAGACTTT     | miRNA | miR-423-5p |
| t0070517 | 24 | 1 TGAGGGGCAGAGAACGAGACTTAC    | miRNA | miR-423-5p |
| t0070625 | 21 | 1 TGCGGGGCAGAGCGCGAGACT       | miRNA | miR-423-5p |
| t0070658 | 21 | 1 TGAGGGGGAGAGAGCGAGATT       | miRNA | miR-423-5p |
| t0070694 | 21 | 1 TGAGGGGCAGAGAGCCAGCCT       | miRNA | miR-423-5p |
| t0070747 | 22 | 1 TGAGGGGCAGCGAGCGGACTT       | miRNA | miR-423-5p |
| t0070789 | 21 | 1 TGGGGAGCAGAGAGCGAGACT       | miRNA | miR-423-5p |
| t0070840 | 21 | 1 TGAGGTGCGGAGAGCGAGACT       | miRNA | miR-423-5p |
| t0071490 | 24 | 1 TGAGGGGCAGAGAGTGAGACTTTC    | miRNA | miR-423-5p |
| t0071889 | 23 | 1 TGAGGGGCAGCGAGCGAGCCTTT     | miRNA | miR-423-5p |
| t0071993 | 24 | 1 TGAGGGGCAGAGAGGGAGACTTTA    | miRNA | miR-423-5p |
| t0072151 | 23 | 1 TGAGGGGCAGAGAGAGAGATTTT     | miRNA | miR-423-5p |
| t0072234 | 23 | 1 TGAGTGGCAGAGAGCGGGACTTT     | miRNA | miR-423-5p |
| t0072321 | 22 | 1 TGAGGGGCAGAGAGCGAGACCA      | miRNA | miR-423-5p |
| t0072437 | 18 | 1 TGAGGGGCGGAGAGCGAG          | miRNA | miR-423-5p |
| t0072559 | 23 | 1 AGGGGCAGAGAGCGAGACTTTTA     | miRNA | miR-423-5p |
| t0072599 | 27 | 1 TGAGGGGCAGAGTGCAGACTTTAGGT  | miRNA | miR-423-5p |
| t0072680 | 23 | 1 TGAAGGGCAGAGAGCGAGCCTTT     | miRNA | miR-423-5p |
| t0072701 | 21 | 1 TGAAGGGCAGAGAGCGGGACT       | miRNA | miR-423-5p |
| t0072738 | 23 | 1 TGAGGGGCAGAGAGCCGACTTT      | miRNA | miR-423-5p |
| t0072825 | 23 | 1 TGAGGGGCAGAGAGCGGGACTTC     | miRNA | miR-423-5p |
| t0073083 | 22 | 1 TGAGGGGCAGACAGAGAGACTT      | miRNA | miR-423-5p |
| t0073171 | 22 | 1 TGAGGGGCAAAGAGCAAGACTT      | miRNA | miR-423-5p |
| t0073253 | 23 | 1 TAAGGGGCAGATAGCGAGACTTT     | miRNA | miR-423-5p |
| t0073288 | 21 | 1 TGAGGGGCAGAGGGCGAGTCT       | miRNA | miR-423-5p |
| t0073639 | 21 | 1 CGAGGGGCAGAGAGCGAGGCT       | miRNA | miR-423-5p |
| t0073794 | 23 | 1 AGATGGGCAGAGAGCGAGACTTT     | miRNA | miR-423-5p |
| t0073976 | 21 | 1 TGAGGGGCAGATAGCGAGAAT       | miRNA | miR-423-5p |
| t0074167 | 23 | 1 TGAGGGGCAGAGAGAGAGACTCT     | miRNA | miR-423-5p |
| t0074201 | 23 | 1 TGAGGTGCAGAGAGCGAGACTTG     | miRNA | miR-423-5p |
| t0074782 | 21 | 1 TGAGGGGCAGCGGGCGAGACT       | miRNA | miR-423-5p |
| t0074838 | 20 | 1 TAAGGGGCAGAGAGCGAGAC        | miRNA | miR-423-5p |
| t0075014 | 22 | 1 TGGGGGGCAGAGAGCGAGAATT      | miRNA | miR-423-5p |
| t0075119 | 21 | 1 TGAGGGGCAGGGAGCGAGACA       | miRNA | miR-423-5p |
| t0075193 | 21 | 1 TAAGGGGCAGAGAGCAAGACT       | miRNA | miR-423-5p |
| t0075214 | 23 | 1 TGGGGGGCAGAGAGCTAGACTTT     | miRNA | miR-423-5p |
| t0075238 | 23 | 1 TGAGGGGCAGAAAGCGAGAATTT     | miRNA | miR-423-5p |
| t0075240 | 23 | 1 TGGGGGGTAGAGAGCGAGACTTT     | miRNA | miR-423-5p |
| t0075568 | 21 | 1 TAGGGGCAGAGAGTGAGACTT       | miRNA | miR-423-5p |
| t0075643 | 23 | 1 TGAGAGGCAGAGAGCTAGACTTT     | miRNA | miR-423-5p |
| t0075866 | 25 | 1 CGAGGGGCAGAGAGCGAGACTTTTT   | miRNA | miR-423-5p |
| t0075953 | 23 | 1 TGAGGGGCTGAGAGCGTGACTTT     | miRNA | miR-423-5p |
| t0075993 | 21 | 1 GAGGGGCAGAGCGCGAGACTT       | miRNA | miR-423-5p |
| t0076696 | 22 | 1 TGGGGGGCAGAGGGCGAGACTT      | miRNA | miR-423-5p |
| t0076721 | 20 | 1 TGAGGGGCAGAGAGTGAGAC        | miRNA | miR-423-5p |
| t0076910 | 22 | 1 TAAGGGGCAGAGACCGAGACTT      | miRNA | miR-423-5p |
| t0077194 | 21 | 1 TGAGGGGCAGAGATCGCGACT       | miRNA | miR-423-5p |
| t0077252 | 22 | 1 TAAGGGGCAGAGAGAGAGACTT      | miRNA | miR-423-5p |
| t0077332 | 20 | 1 TGAGGGGCAGAGAGAGAGAA        | miRNA | miR-423-5p |
| t0077607 | 24 | 1 AGAGGGGCAGAGAGCGAGACTTTT    | miRNA | miR-423-5p |
| t0077610 | 22 | 1 TGAGGGGCAGAGAGCGAGCTTT      | miRNA | miR-423-5p |
| t0077624 | 20 | 1 TGAGGCGCAGAGAGCGAGAC        | miRNA | miR-423-5p |
| t0077749 | 22 | 1 TGATGGCCAGAGAGCGAGACTT      | miRNA | miR-423-5p |
| t0077810 | 22 | 1 ATAGGGGCAGAGAGCGAGACTT      | miRNA | miR-423-5p |
| t0078349 | 23 | 1 TGAGGGACAGGGAGCGAGACTTT     | miRNA | miR-423-5p |
| t0078579 | 27 | 1 TGAGGGGCAGAGAGCGAGACTTTTGTT | miRNA | miR-423-5p |

|          |    |                             |       |            |
|----------|----|-----------------------------|-------|------------|
| t0078620 | 23 | 1 TGCGTGGCAGAGAGCGAGACTTT   | miRNA | miR-423-5p |
| t0078716 | 22 | 1 TGAGGGGCAGAGAGAGAGACTT    | miRNA | miR-423-5p |
| t0078994 | 22 | 1 TGAGGGGCCGAGAGAGAGACTT    | miRNA | miR-423-5p |
| t0079035 | 19 | 1 TGAGGGGCAGAGAGCGAGA       | miRNA | miR-423-5p |
| t0079172 | 21 | 1 TGAGGGGCAGAGAGCGAGCCT     | miRNA | miR-423-5p |
| t0079271 | 24 | 1 TCAGGGGCAGAGAGCGAGACTTTT  | miRNA | miR-423-5p |
| t0079322 | 22 | 1 TAAGGGGCAGAGAGCTAGACTT    | miRNA | miR-423-5p |
| t0079365 | 21 | 1 TGAGGGGCAGAGAGCGTGCCT     | miRNA | miR-423-5p |
| t0079414 | 18 | 1 TGAGGGGCAGCGAGCGAG        | miRNA | miR-423-5p |
| t0079531 | 22 | 1 TGAGGGGCAGAGAGCGAGATTC    | miRNA | miR-423-5p |
| t0079549 | 23 | 1 TGAGGGGCAGAGAGCAAGACCTT   | miRNA | miR-423-5p |
| t0079646 | 21 | 1 GGAGGGGCAGATAGCGAGACT     | miRNA | miR-423-5p |
| t0079891 | 21 | 1 TGAGGGGCAGAGGGCGAGAAT     | miRNA | miR-423-5p |
| t0079966 | 21 | 1 TGAGGGGCAGATAGCGAGAGT     | miRNA | miR-423-5p |
| t0080069 | 24 | 1 TGAGGGGCAGAGAGCGAGGCTTTA  | miRNA | miR-423-5p |
| t0080215 | 24 | 1 TGAGGGGCAGAGAGAGAGACTTGA  | miRNA | miR-423-5p |
| t0080250 | 22 | 1 TGAGGGGCAGAGACCGAGCCTT    | miRNA | miR-423-5p |
| t0080445 | 23 | 1 TGAGGGGCATAGCGCGAGACTTT   | miRNA | miR-423-5p |
| t0080477 | 24 | 1 TGAGGGGCAGAGAGCGAGAACTTT  | miRNA | miR-423-5p |
| t0080492 | 23 | 1 TGAGGGGCAGACAGAGAGACTTT   | miRNA | miR-423-5p |
| t0080497 | 23 | 1 TGAGGGGAAGAGAGGGAGACTTT   | miRNA | miR-423-5p |
| t0080672 | 24 | 1 TGAGGGGCAGAGTGCCGAGACTTGA | miRNA | miR-423-5p |
| t0080763 | 18 | 1 TGAGGGACAGAGAGCGAG        | miRNA | miR-423-5p |
| t0080865 | 24 | 1 AGAGGGGCAGAGAGCGAGACTTAG  | miRNA | miR-423-5p |
| t0080987 | 21 | 1 TGAGGGGCACAGAGCGAGTCT     | miRNA | miR-423-5p |
| t0081164 | 21 | 1 AGGGGCAGAGCGCGAGACTTT     | miRNA | miR-423-5p |
| t0081423 | 23 | 1 TGCGGGGCAGAGAGCGAGAATTT   | miRNA | miR-423-5p |
| t0081458 | 24 | 1 TGAGAGGCAGAGAGCGAGACTTAG  | miRNA | miR-423-5p |
| t0081539 | 24 | 1 TGAGGGGCAGAGAGCGAACTTTT   | miRNA | miR-423-5p |
| t0081675 | 23 | 1 TGAGGGGAAGAGAGCGACACTTT   | miRNA | miR-423-5p |
| t0081903 | 22 | 1 GAGGGGCGGAGAGCGAGACTTT    | miRNA | miR-423-5p |
| t0082063 | 21 | 1 TGAGTGGCAGAGGGCGAGACT     | miRNA | miR-423-5p |
| t0082099 | 23 | 1 TGAGGGGCAGAGGGCTAGACTTT   | miRNA | miR-423-5p |
| t0082118 | 23 | 1 TGAGGGGAAGAGAGCCAGACTTT   | miRNA | miR-423-5p |
| t0082331 | 23 | 1 TGAAGGGCAGAGAGCGAGAGTTT   | miRNA | miR-423-5p |
| t0082356 | 21 | 1 TGGGGGGCAGAGAGCGATACT     | miRNA | miR-423-5p |
| t0082455 | 21 | 1 TGAGGGGTAGAGAGCGGGACT     | miRNA | miR-423-5p |
| t0082714 | 18 | 1 TGAGGGGCAGAGCGCGAG        | miRNA | miR-423-5p |
| t0082757 | 23 | 1 TGGGGGGCAGAGATCGAGACTTT   | miRNA | miR-423-5p |
| t0083039 | 21 | 1 TGAGGGTCAGAGAGCGGGACT     | miRNA | miR-423-5p |
| t0083627 | 21 | 1 CGAGGGGAAGAGAGCGAGACT     | miRNA | miR-423-5p |
| t0083659 | 21 | 1 TGAGGGGCAGAGCGCGAGAAT     | miRNA | miR-423-5p |
| t0083834 | 23 | 1 TGAGTGAAGAGAGCGAGACTTT    | miRNA | miR-423-5p |
| t0083906 | 22 | 1 TGAGGGGAAGAGAGCGAGTCTT    | miRNA | miR-423-5p |
| t0083917 | 23 | 1 TGAGGGGCAGAGAGGGAGACTTG   | miRNA | miR-423-5p |
| t0083996 | 24 | 1 TGAGGGGGAGAGAGCGAGACTTTA  | miRNA | miR-423-5p |
| t0084182 | 21 | 1 TGAGGTGCAGAGAGCGAGGCT     | miRNA | miR-423-5p |
| t0084235 | 23 | 1 TGAGGGGCATAGAGCGAGACTTA   | miRNA | miR-423-5p |
| t0084252 | 21 | 1 TGAGGGGGAGAGAGCGGGACT     | miRNA | miR-423-5p |
| t0084382 | 18 | 1 TGAGGGGCAGAGAGAGAG        | miRNA | miR-423-5p |
| t0084599 | 24 | 1 TGAGGGGCAGAGAGCGAGATTTAT  | miRNA | miR-423-5p |
| t0084681 | 23 | 1 TGAGGGGCAGAGCGCTAGACTTT   | miRNA | miR-423-5p |
| t0084746 | 19 | 1 GAGGGGCAGAGAGCGCGAC       | miRNA | miR-423-5p |
| t0084941 | 21 | 1 TGAGGGGCAGAGAGCGGGACA     | miRNA | miR-423-5p |
| t0084962 | 21 | 1 TGAGGGGCAGAGAGTGAGCCT     | miRNA | miR-423-5p |
| t0085084 | 24 | 1 TGAGGAGCAGAGAGCGAGACTTAG  | miRNA | miR-423-5p |
| t0085226 | 23 | 1 TGAGGGGCAGAGAGCGAGGGTTT   | miRNA | miR-423-5p |
| t0085383 | 21 | 1 TGAGGGGTAGAGAGCGAGACA     | miRNA | miR-423-5p |

|          |    |                                 |       |            |
|----------|----|---------------------------------|-------|------------|
| t0085432 | 23 | 1 TGAGTGGCAGAGAGAGACTTT         | miRNA | miR-423-5p |
| t0085593 | 21 | 1 TGAGGGGCAGAGACGGAGACT         | miRNA | miR-423-5p |
| t0085607 | 19 | 1 TGCGGGGCAGAGAGCGAGA           | miRNA | miR-423-5p |
| t0085703 | 23 | 1 TGAGGGCTAGAGAGCGACTTT         | miRNA | miR-423-5p |
| t0085782 | 23 | 1 TGATGGGCAGAGAGCGACTTC         | miRNA | miR-423-5p |
| t0085827 | 23 | 1 TGAGGGGCAGAGAGCCGACTTT        | miRNA | miR-423-5p |
| t0086023 | 22 | 1 GAGGGGCCAGAGCGAGACTTT         | miRNA | miR-423-5p |
| t0086314 | 25 | 1 TGAGGGGCAGAGAGCGAGCCTTAGA     | miRNA | miR-423-5p |
| t0086575 | 23 | 1 TTAGGGGAAGAGAGCGAGACTTT       | miRNA | miR-423-5p |
| t0086632 | 21 | 1 TGAGGGGCAGGAAGCGAGACT         | miRNA | miR-423-5p |
| t0086671 | 23 | 1 TGAGGGGCAGATAGGGAGACTTT       | miRNA | miR-423-5p |
| t0086860 | 23 | 1 TGAGGGGCAGACAGCGAGACTTG       | miRNA | miR-423-5p |
| t0086904 | 22 | 1 TGAGGGGCAGATAGCGAGAATT        | miRNA | miR-423-5p |
| t0087017 | 23 | 1 TGAGGTGCAGAGAGCGAGTCTTT       | miRNA | miR-423-5p |
| t0087043 | 23 | 1 TGAGGGGCAGAGGGCGAGACTCT       | miRNA | miR-423-5p |
| t0087049 | 21 | 1 TGAGGGGCTGAGAGCGAGCCT         | miRNA | miR-423-5p |
| t0087142 | 21 | 1 TGAGGGGCAGATAGCGCGACT         | miRNA | miR-423-5p |
| t0087150 | 24 | 1 TGCGGGGCAGAGAGCGAGACTTTT      | miRNA | miR-423-5p |
| t0087210 | 21 | 1 TAGGGGCAGGGAGCGAGACTT         | miRNA | miR-423-5p |
| t0087516 | 22 | 1 TGAGGGGCAGACAGCGAGCCTT        | miRNA | miR-423-5p |
| t0087629 | 23 | 1 TGAGCGGCAGAGGGCGAGACTTT       | miRNA | miR-423-5p |
| t0087846 | 22 | 1 TGAGGGGCAGAGAGCGAGAATA        | miRNA | miR-423-5p |
| t0087854 | 21 | 1 CGAGGGGCAGAGAGCGAGCCT         | miRNA | miR-423-5p |
| t0087915 | 23 | 1 TGACGGGCAGAGGGCGAGACTTT       | miRNA | miR-423-5p |
| t0087965 | 23 | 1 TGAGGCGCAGAGAGCGAGACTTA       | miRNA | miR-423-5p |
| t0087985 | 21 | 1 AGGGGCAGAGAGAGACTTT           | miRNA | miR-423-5p |
| t0088118 | 22 | 1 TGAGGGGCAGAGAGAGAGCCTT        | miRNA | miR-423-5p |
| t0088207 | 23 | 1 TGAGGGGCAGAGACCGGGACTTT       | miRNA | miR-423-5p |
| t0088217 | 23 | 1 TGATGGGAAGAGAGCGAGACTTT       | miRNA | miR-423-5p |
| t0088232 | 23 | 1 TGATGGGCAGAGAGCGAGCCTTT       | miRNA | miR-423-5p |
| t0088244 | 23 | 1 TGAGGGTCAGGGAGCGAGACTTT       | miRNA | miR-423-5p |
| t0088374 | 19 | 1 TGAGGGGCAGAGCGCGATA           | miRNA | miR-423-5p |
| t0088821 | 22 | 1 TGAGGGGCAGACAGCGGGACTT        | miRNA | miR-423-5p |
| t0088850 | 22 | 1 TGAGGGGCAGAGAGCGGGATTT        | miRNA | miR-423-5p |
| t0088891 | 23 | 1 TGAGGGGCAGAGCGAGAGACTTT       | miRNA | miR-423-5p |
| t0089309 | 23 | 1 CGAGGGGCAGAAAGCGAGACTTT       | miRNA | miR-423-5p |
| t0089374 | 42 | 1 TGAGGGGCAGAGAGCGCGAGTTTTTCGTA | miRNA | miR-423-5p |
| t0089440 | 23 | 1 TGAGGGGCAGAGAGCGAGAATTG       | miRNA | miR-423-5p |
| t0089627 | 23 | 1 TGAGGGGCCAGAGAGCGAGAATTT      | miRNA | miR-423-5p |
| t0089784 | 21 | 1 TTGAGGGGCAGAGAGCAAGAC         | miRNA | miR-423-5p |
| t0089890 | 23 | 1 TAAGGGGCAGAGAGCGAGACTTG       | miRNA | miR-423-5p |
| t0090219 | 23 | 1 TGAGGGGTAGAGAGCTAGACTTT       | miRNA | miR-423-5p |
| t0090336 | 23 | 1 TGAGGGGCAGAGAGTGAGACTTC       | miRNA | miR-423-5p |
| t0090368 | 24 | 1 TGAGGGGCAGAGGGCGAGACTTAA      | miRNA | miR-423-5p |
| t0090378 | 21 | 1 TGAGGGGCAGAGATCGAGAAT         | miRNA | miR-423-5p |
| t0090473 | 22 | 1 TGAGGGGCAGAGAACGAGATTT        | miRNA | miR-423-5p |
| t0090513 | 22 | 1 TGAGAGCCAGAGAGCGAGACTT        | miRNA | miR-423-5p |
| t0090622 | 24 | 1 TGAGGGGCAGAGAGCGAGACTTGG      | miRNA | miR-423-5p |
| t0090640 | 23 | 1 TTAGGGGCAGAGAGCGAGACTTA       | miRNA | miR-423-5p |
| t0090644 | 23 | 1 TGAGGGGAAGAGAGCGAGATTTT       | miRNA | miR-423-5p |
| t0090652 | 21 | 1 TGAGGGGCAGAGAGATAGACT         | miRNA | miR-423-5p |
| t0090771 | 24 | 1 TGAGGGGCAGAGAGAGAGACATTT      | miRNA | miR-423-5p |
| t0090902 | 21 | 1 TGAGGGGCAGAGAGCGTGAGT         | miRNA | miR-423-5p |
| t0090914 | 22 | 1 TGAGGGGCAGAGAGGGAGAATT        | miRNA | miR-423-5p |
| t0090986 | 24 | 1 TGAGGGGCAGACAGCGAGACTTAG      | miRNA | miR-423-5p |
| t0091047 | 24 | 1 CGAGGGGCAGAGAGCGAGACTTTA      | miRNA | miR-423-5p |
| t0091254 | 24 | 1 TGAGGGGCAGAGAGCGCGACTTAA      | miRNA | miR-423-5p |
| t0091260 | 23 | 1 TGAGGGGCAGACAGTGAGACTTT       | miRNA | miR-423-5p |

|          |    |                                |       |              |
|----------|----|--------------------------------|-------|--------------|
| t0091307 | 20 | 1 TGAGGGGCAGAGAGCGAAAC         | miRNA | miR-423-5p   |
| t0091537 | 23 | 1 TGAGGGGCAGAGAGCGATACTTA      | miRNA | miR-423-5p   |
| t0091679 | 21 | 1 TGAGGGGCAGAGGGCGAGATT        | miRNA | miR-423-5p   |
| t0091858 | 24 | 1 TGAGGGGCAGAGAGCGGGACTTGA     | miRNA | miR-423-5p   |
| t0092142 | 23 | 1 TGAGGAGCATAGAGCGAGACTTT      | miRNA | miR-423-5p   |
| t0092281 | 26 | 1 TGAGGGGCAGCGAGCGAGACTTTTCT   | miRNA | miR-423-5p   |
| t0092380 | 21 | 1 TGAGGGGCAGAGAGTCAGACT        | miRNA | miR-423-5p   |
| t0092402 | 25 | 1 TGAGGGGCAGAGAGCGGGACTTTAT    | miRNA | miR-423-5p   |
| t0092416 | 22 | 1 TAAGTGGCAGAGAGCGAGACTT       | miRNA | miR-423-5p   |
| t0092452 | 24 | 1 TGAGGGGCAAAGAGCGAGACTTTT     | miRNA | miR-423-5p   |
| t0092477 | 23 | 1 TGAGGGGCAGTGAGAGAGACTTT      | miRNA | miR-423-5p   |
| t0092498 | 21 | 1 AGCTAGGTCTGAGGCCCTTCA        | miRNA | miR-423-3p   |
| t0092641 | 23 | 1 AGCTCGGTCTGAGGCCCTCAGT       | miRNA | miR-423-3p   |
| t0092750 | 22 | 1 ACTGGACTTAGAGTCAGAAAGGC      | miRNA | miR-422a     |
| t0092774 | 28 | 1 GGGGATGTAGATCAGATGGTAGAGCAGA | miRNA | miR-4175-3p  |
| t0092925 | 21 | 1 GGGGATGTAGCTCGAATGGTA        | miRNA | miR-4175-3p  |
| t0092941 | 22 | 1 GGGGATGTAGCTCATATGGGAG       | miRNA | miR-4175-3p  |
| t0093147 | 28 | 1 GGGGCTGTAGCTCAGATGGGAGAGAGCT | miRNA | miR-4175-3p  |
| t0093191 | 21 | 1 GGGGATGTAGATCATATGGTA        | miRNA | miR-4175-3p  |
| t0093212 | 20 | 1 GGGGATGTAGCTAAGATGGT         | miRNA | miR-4175-3p  |
| t0093229 | 19 | 1 GGGGATGTAGCTCCGATGG          | miRNA | miR-4175-3p  |
| t0093248 | 24 | 1 GGGGATGTAGCTCAGATGGTTGAG     | miRNA | miR-4175-3p  |
| t0093413 | 21 | 1 GGGGATGCAGCTCAGATGGTA        | miRNA | miR-4175-3p  |
| t0093538 | 19 | 1 GGGGATGTAGATCAGATGG          | miRNA | miR-4175-3p  |
| t0048405 | 32 | 1 GGGGCTGTAGCTCAGATGGGAGAGAGCC | miRNA | miR-4175-3p  |
| t0052409 | 21 | 1 AGACTGTAGTTGGTGCTAATT        | miRNA | miR-4152-5p  |
| t0068231 | 23 | 1 CTTCTCCTCCAGCTCGGCGTTT       | miRNA | miR-4123-5p  |
| t0046682 | 24 | 1 ACTTCTCCTACAGCTCGGCATTT      | miRNA | miR-4123-5p  |
| t0048296 | 21 | 1 ACTTCTCCTCCAGCTCGGCT         | miRNA | miR-4123-5p  |
| t0052489 | 22 | 1 GAGTGTTGCTCGGTGAACCCCT       | miRNA | miR-409-3p   |
| t0064219 | 22 | 1 GAATGTTCTCGGTGAACCCCT        | miRNA | miR-409-3p   |
| t0070896 | 21 | 1 TGGAACTCTGATATTCGCAGG        | miRNA | miR-4001g-3p |
| t0071503 | 24 | 1 CATGGACTCGCAGGAACAGGTTTT     | miRNA | miR-4001b-5p |
| t0084702 | 20 | 1 TGGACTCGCAGGAACAGGTC         | miRNA | miR-4001b-5p |
| t0085626 | 22 | 1 ATGGACTCGCAGGAACAGGCTA       | miRNA | miR-4001b-5p |
| t0087614 | 24 | 1 ATGGACTCGCAGGAACAGGCATTT     | miRNA | miR-4001b-5p |
| t0092076 | 22 | 1 TGGACTCGCAGGAACAGGCCTA       | miRNA | miR-4001b-5p |
| t0093216 | 22 | 1 TGGACTCGCAGGAAAAGGCCCT       | miRNA | miR-4001b-5p |
| t0067282 | 21 | 1 TGGACTCGCAGGAACAGGCCT        | miRNA | miR-4001b-5p |
| t0046216 | 24 | 1 ATGGACTCGCAGGAACAGGCTTTT     | miRNA | miR-4001b-5p |
| t0047970 | 20 | 1 TGGACTCGCAGGAACAGGCC         | miRNA | miR-4001b-5p |
| t0088565 | 25 | 1 TGGACTCGCAGGAACAGGCATATTT    | miRNA | miR-4001b-5p |
| t0062231 | 26 | 1 TGGACTCGCAGGAACAGGCCTATTTT   | miRNA | miR-4001b-5p |
| t0072051 | 19 | 1 ATAAGGAGAAAGCAATGTA          | miRNA | miR-3964     |
| t0069995 | 22 | 1 TCGAATCCCACTCCTGACACCC       | miRNA | miR-3963     |
| t0047668 | 21 | 1 TTAGGTAGTAGTTTGTACAGT        | miRNA | miR-3962     |
| t0055681 | 22 | 1 AGAGGTAGTAGTTTGTACAGTT       | miRNA | miR-3962     |
| t0057654 | 23 | 1 TTAGGTAGTAGATTGTACAGTTT      | miRNA | miR-3962     |
| t0066293 | 20 | 1 TAAGGTAGTAGTTTGTACAG         | miRNA | miR-3962     |
| t0068539 | 22 | 1 TAAGGCAGTAGTTTGTACAGTT       | miRNA | miR-3962     |
| t0069930 | 22 | 1 CGAGGTAGTAGTTTGTGCAGTT       | miRNA | miR-3962     |
| t0072844 | 22 | 1 CGAGGTAGTAGTTTGTACAGTA       | miRNA | miR-3962     |
| t0074934 | 22 | 1 AGGTAGTAGTTTGTACAGTTT        | miRNA | miR-3962     |
| t0075052 | 20 | 1 TGAGTAGTAGTTTGTACAGT         | miRNA | miR-3962     |
| t0084101 | 22 | 1 CGAGGTGGTAGTTTGTACAGTT       | miRNA | miR-3962     |
| t0089532 | 21 | 1 TAAGGTAGTAGATTGTACAGT        | miRNA | miR-3962     |
| t0067524 | 22 | 1 TTAGGTAGTAGTTTGTATAGTT       | miRNA | miR-3962     |
| t0051095 | 22 | 1 AGAGGTAGTAGCTTGTACAGTT       | miRNA | miR-3962     |

|          |    |   |                               |       |             |
|----------|----|---|-------------------------------|-------|-------------|
| t0043498 | 22 | 1 | CGAGGTAGTAGATTGTACAGTT        | miRNA | miR-3962    |
| t0046194 | 22 | 1 | TAAGGTAGTAGATTGTACAGTT        | miRNA | miR-3962    |
| t0049893 | 22 | 1 | AGAGGTAGTAGTTTGCACAGTT        | miRNA | miR-3962    |
| t0050542 | 19 | 1 | AGGTAGTAGTTTATACAGT           | miRNA | miR-3962    |
| t0051197 | 22 | 1 | ACAGCCCGGATCCCAGCCCCCT        | miRNA | miR-3940-3p |
| t0051213 | 25 | 1 | GGAGAAACCTTGGAGCTTCGGCTAT     | miRNA | miR-3928    |
| t0055469 | 22 | 1 | TGTCCTCTAGGGACTGCAGTCG        | miRNA | miR-3909    |
| t0067492 | 23 | 1 | GAAGTGAAGCGGACAAGGGGAAT       | miRNA | miR-3896-3p |
| t0069021 | 27 | 1 | AGAACTGAAACGGACAAGGGGAATACG   | miRNA | miR-3896-3p |
| t0070320 | 20 | 1 | AACTGAAACGGATAAAGGGGA         | miRNA | miR-3896-3p |
| t0075243 | 22 | 1 | TCGGGGCGGCGGCGGCGGGGT         | miRNA | miR-3885-5p |
| t0081763 | 19 | 1 | GCGGCGGCGGTGGGGGCG            | miRNA | miR-3885-5p |
| t0082397 | 28 | 1 | CCGGCGGCGGCGGCGACTCTGGAAGCGA  | miRNA | miR-3885-5p |
| t0083032 | 26 | 1 | GGGGCCGCGGCGGCGGCGACCCTGG     | miRNA | miR-3885-5p |
| t0086539 | 26 | 1 | TCGGGGCGGCGGCGGCGGCGGTGGCG    | miRNA | miR-3885-5p |
| t0089065 | 21 | 1 | GCGGCGTCGGCGGCGGCGGGG         | miRNA | miR-3885-5p |
| t0093223 | 21 | 1 | CGGCGGCGGCGGAGGAGGAGA         | miRNA | miR-3885-5p |
| t0051697 | 25 | 1 | ACCGGGGGGCGGCGGCGGCGGCGG      | miRNA | miR-3885-5p |
| t0090744 | 21 | 1 | CGGCGGCGTCGGCGGCGGCGG         | miRNA | miR-3885-5p |
| t0087999 | 23 | 1 | GGGCGGCGGCGGCGGCGGGGGG        | miRNA | miR-3885-5p |
| t0057191 | 21 | 1 | GCGGCGGCGGCGGGGGGGTGG         | miRNA | miR-3885-5p |
| t0075790 | 26 | 1 | CGGCGGCGGCGGGGGCGGCGGGACCG    | miRNA | miR-3885-5p |
| t0085005 | 22 | 1 | TCGGGGCGGCGGCGGCGGCGTG        | miRNA | miR-3885-5p |
| t0041092 | 24 | 1 | GCGGCGAGCAGCGGCGGACCATAA      | miRNA | miR-3885-5p |
| t0042916 | 19 | 1 | GGGCGGCGGCGGGGGGGGA           | miRNA | miR-3885-5p |
| t0043772 | 24 | 1 | TCGGGGCGGCGGCGGCGGCGGCGG      | miRNA | miR-3885-5p |
| t0043883 | 27 | 1 | GGAGGGCGGCGGCGGCGGCGGGGGC     | miRNA | miR-3885-5p |
| t0044402 | 28 | 1 | CGGCGGCGGAGGCGACTCTGGACGCGAC  | miRNA | miR-3885-5p |
| t0045168 | 20 | 1 | GCGGCGGCGGCGGGGGGGTA          | miRNA | miR-3885-5p |
| t0047513 | 20 | 1 | CGGCGGCGGCGGCGGCGGTG          | miRNA | miR-3885-5p |
| t0047586 | 22 | 1 | GCGGCGGCGGCGGGGGGGTGG         | miRNA | miR-3885-5p |
| t0047933 | 23 | 1 | TCGGAGGGCGGCGGCGGCGGCGG       | miRNA | miR-3885-5p |
| t0048693 | 25 | 1 | TCGGGGCGGCGGCGGCGGCGGCGG      | miRNA | miR-3885-5p |
| t0049365 | 30 | 1 | GGCCGGCGGCGGCGGCGACTCTGGACGCG | miRNA | miR-3885-5p |
| t0049521 | 22 | 1 | GCGGCGGCGGCGGGGGTGGGG         | miRNA | miR-3885-5p |
| t0049533 | 23 | 1 | CGGCGGCGGCGGCGGTGGCGGCG       | miRNA | miR-3885-5p |
| t0050342 | 23 | 1 | CGGCGGCGTCGGCGGGGGCGGGA       | miRNA | miR-3885-5p |
| t0052059 | 23 | 1 | CGGCGGCGTCGGCGGCGGCGGGA       | miRNA | miR-3885-5p |
| t0052061 | 28 | 1 | CGGCGGCGGCGGCGACTCTGGACGGGAC  | miRNA | miR-3885-5p |
| t0052429 | 18 | 1 | GGGCGGCGGCGGCGGAGG            | miRNA | miR-3885-5p |
| t0053283 | 22 | 1 | TCGGGGCGGCGGCGGCCGCGGT        | miRNA | miR-3885-5p |
| t0053563 | 21 | 1 | GGGCGGCGGCGGGGGGGGAAG         | miRNA | miR-3885-5p |
| t0056394 | 24 | 1 | CGGCTGAGGCGGCGTTCGGTAGAGT     | miRNA | miR-3885-5p |
| t0057778 | 22 | 1 | GCGGCGGCGGCGGGGGCGGCG         | miRNA | miR-3885-5p |
| t0059510 | 19 | 1 | CGGCGGCGGCGGGGGTGGG           | miRNA | miR-3885-5p |
| t0059784 | 22 | 1 | TCAGGGCGGCGGCGGCGGCGGT        | miRNA | miR-3885-5p |
| t0059936 | 19 | 1 | CGGCGGCGGCGGCGGGACG           | miRNA | miR-3885-5p |
| t0060423 | 22 | 1 | AGGGCGGCGGCGGCGGCGGGG         | miRNA | miR-3885-5p |
| t0061423 | 18 | 1 | CGGCGGCGGCGGGGGTGT            | miRNA | miR-3885-5p |
| t0062949 | 25 | 1 | CGGCGGCGGCGACTCTGGACGGGAG     | miRNA | miR-3885-5p |
| t0063196 | 19 | 1 | CGGCGGCGGCGGGGGGGG            | miRNA | miR-3885-5p |
| t0063229 | 23 | 1 | CGGCGGGGGCGGGGGCGGGCGGG       | miRNA | miR-3885-5p |
| t0063750 | 25 | 1 | CGGCGGCGGCGACTCTGGAAGCGAG     | miRNA | miR-3885-5p |
| t0065002 | 20 | 1 | GCGGCGGCGGGGGGGGGG            | miRNA | miR-3885-5p |
| t0065162 | 26 | 1 | GGAGGGCGGCGGAGGCGGCGGGGGG     | miRNA | miR-3885-5p |
| t0066541 | 27 | 1 | AGGGCGGCGGCGGCGGCGGCGGGG      | miRNA | miR-3885-5p |
| t0068348 | 22 | 1 | GCGGCGTCGGCGGCGGCGGGA         | miRNA | miR-3885-5p |
| t0068843 | 19 | 1 | CGGCGGCGGCGGCGGGGT            | miRNA | miR-3885-5p |

|          |    |                               |       |             |
|----------|----|-------------------------------|-------|-------------|
| t0069959 | 26 | 1 GGAGGGCGGCGGCGGCGGCGGGGGTG  | miRNA | miR-3885-5p |
| t0070600 | 23 | 1 GGGGCCGCGGCGGCGACTCTGG      | miRNA | miR-3885-5p |
| t0070970 | 21 | 1 GGCGGCGTCCGCGGCGGGGGG       | miRNA | miR-3885-5p |
| t0071655 | 24 | 1 CGGCGGCGTCCGCGGCGGCGGGAC    | miRNA | miR-3885-5p |
| t0073242 | 27 | 1 ACCCGGGGGGCGGCGGCGGCGGCGAA  | miRNA | miR-3885-5p |
| t0074120 | 22 | 1 TCGGGGCGGCGGCGGAGGCGGA      | miRNA | miR-3885-5p |
| t0074345 | 18 | 1 GCGGCGGCGGGGGGGTG           | miRNA | miR-3885-5p |
| t0075962 | 23 | 1 TCGGGGCGGCGGCGGCGGCGGAG     | miRNA | miR-3885-5p |
| t0076026 | 25 | 1 GCGGCGGCGGCGGGGGCGGCGGA     | miRNA | miR-3885-5p |
| t0078590 | 27 | 1 ACCCGGGGGGCGGCGGCGGCGGGGAC  | miRNA | miR-3885-5p |
| t0079950 | 18 | 1 GCGGCGGCGGGGGGTGTG          | miRNA | miR-3885-5p |
| t0080006 | 25 | 1 GCGGCGGGGGCGGTGGCATCATAA    | miRNA | miR-3885-5p |
| t0080406 | 20 | 1 ATTCGAGACTTACGTTGCGT        | miRNA | miR-3850-3p |
| t0080528 | 25 | 1 TATACAAGGGCAAGCTCTCTGTATC   | miRNA | miR-381     |
| t0080758 | 24 | 1 TGGTAGACTATGGAACGTAGGCTC    | miRNA | miR-379-5p  |
| t0080765 | 23 | 1 ACTGGACTTGGAGTCAGAAGTCG     | miRNA | miR-378f    |
| t0081649 | 20 | 1 ACTGGACTTGGAGGCAGAAG        | miRNA | miR-378f    |
| t0081759 | 23 | 1 ACTGGACTTGGAGAAAGAAGGCT     | miRNA | miR-378f    |
| t0081933 | 23 | 1 ACTGGACTTGGAGCCAGAAGGCT     | miRNA | miR-378f    |
| t0082058 | 26 | 1 ACTGGACTTGGAGGCAGAAGGCTATC  | miRNA | miR-378f    |
| t0086106 | 22 | 1 CTGGACTTGGAGGCAGAAGGCT      | miRNA | miR-378f    |
| t0090554 | 26 | 1 ACTGGACTTGGAGTCAGAAGGATATC  | miRNA | miR-378f    |
| t0092096 | 22 | 1 CTGGACTTGGAGACAGAAGGCC      | miRNA | miR-378f    |
| t0092826 | 23 | 1 ACTGGACTTGGAGGCAGAAGGCT     | miRNA | miR-378f    |
| t0093030 | 24 | 1 ACTGGACTTGGAGGCAGAAGGATC    | miRNA | miR-378f    |
| t0070190 | 22 | 1 ACTGGACTTGGAGTAAGAAGGA      | miRNA | miR-378c    |
| t0082579 | 22 | 1 ACTGGACTTGGAGCCAGAAGGA      | miRNA | miR-378c    |
| t0044704 | 23 | 1 ACTGGCCTTGGAGTCAGAAGGAG     | miRNA | miR-378c    |
| t0044061 | 22 | 1 ACTGGACTGGGCGTCAGAAGGA      | miRNA | miR-378c    |
| t0048790 | 25 | 1 ACTGGACTTGGAGTTAGCAGGAATC   | miRNA | miR-378c    |
| t0053592 | 25 | 1 ACTAGACTTGGAGTCAGAAGGAATC   | miRNA | miR-378c    |
| t0057499 | 22 | 1 ACTGGACTTGGAGTCAGCAGGA      | miRNA | miR-378c    |
| t0057877 | 22 | 1 ACTGGACTTGGAGACAGAAGGA      | miRNA | miR-378c    |
| t0060331 | 22 | 1 TTGGGCTTGGAGTCAGAAGGCA      | miRNA | miR-378b    |
| t0074019 | 21 | 1 CGGCGAGTCGGGGTGTGGG         | miRNA | miR-3787    |
| t0081718 | 24 | 1 AAGTAATTGATGATGATCGTGGAT    | miRNA | miR-3781    |
| t0082561 | 22 | 1 CTGGACCTGGAGTCAGAAGGCT      | miRNA | miR-378     |
| t0083964 | 25 | 1 ATTGGACTTGGAGTCAGAAGGCATC   | miRNA | miR-378     |
| t0066188 | 23 | 1 ACTGGCCTTGGAGTCAGAAGGCG     | miRNA | miR-378     |
| t0068729 | 23 | 1 ACTGGACTTGGAGTCGGAAGGCA     | miRNA | miR-378     |
| t0069719 | 25 | 1 ACTGGACTTGGAGTCAGAAGGGATC   | miRNA | miR-378     |
| t0073769 | 20 | 1 ACTGGACTTGGCGTCAGAAG        | miRNA | miR-378     |
| t0078217 | 27 | 1 ACTGGACTTGGGGTCAGAAGGAATATC | miRNA | miR-378     |
| t0080655 | 24 | 1 ACTGGACTTGGAGACAGAAGGCAT    | miRNA | miR-378     |
| t0090891 | 22 | 1 CTGGACTTGGACTCAGAAGGCC      | miRNA | miR-378     |
| t0091613 | 23 | 1 ACTGGACTTGGAGTCAGAAGGGA     | miRNA | miR-378     |
| t0062694 | 21 | 1 ACTGGACTTGGAGTCGGAAGG       | miRNA | miR-378     |
| t0064536 | 20 | 1 ACTGGACTCGGAGTCAGAAG        | miRNA | miR-378     |
| t0045313 | 21 | 1 CTGGACTTGGGGTCAGAAGGC       | miRNA | miR-378     |
| t0041458 | 25 | 1 ACTGGAATTGGAGTCAGAAGGCATC   | miRNA | miR-378     |
| t0042590 | 24 | 1 ACTGGACTTGGAGACAGAAGGCAA    | miRNA | miR-378     |
| t0044934 | 22 | 1 ACTGGACTGGGAGTCAGAAGGC      | miRNA | miR-378     |
| t0045894 | 23 | 1 ACTGGACTTGGAGTCAGAAGACA     | miRNA | miR-378     |
| t0046459 | 25 | 1 ACTAGACTTGGAGTCAGAAGGCATC   | miRNA | miR-378     |
| t0046781 | 23 | 1 ACTGGACTTGGAGTCAGGAGGCA     | miRNA | miR-378     |
| t0046924 | 25 | 1 ACTGGACTTGGAGTCTGAAGGCATC   | miRNA | miR-378     |
| t0047321 | 23 | 1 ACTGGACTTGGAGTCAAAAGGCG     | miRNA | miR-378     |
| t0047754 | 22 | 1 ACTGGACTTGGAGTTAGACGGC      | miRNA | miR-378     |

|          |    |                               |       |          |
|----------|----|-------------------------------|-------|----------|
| t0047824 | 24 | 1 CTGGACTTGGAGCCAGAAGGCATC    | miRNA | miR-378  |
| t0048848 | 22 | 1 CTGGCCTTGGAGTCAGAAGGCA      | miRNA | miR-378  |
| t0050441 | 23 | 1 ATTGACTTGGAGTCAGAAGGCG      | miRNA | miR-378  |
| t0051120 | 25 | 1 ACTGGACTTGGAGTCAGAAGACATC   | miRNA | miR-378  |
| t0052451 | 23 | 1 ACTGGACTTGGCGTCAGAAGGCT     | miRNA | miR-378  |
| t0052990 | 23 | 1 ACTGGACTTGGCGTCAGAAGGCA     | miRNA | miR-378  |
| t0053402 | 23 | 1 ACTAGACTTGGAGTCAGAAGGCG     | miRNA | miR-378  |
| t0053403 | 23 | 1 ACTGGAATTGGAGTCAGAAGGCG     | miRNA | miR-378  |
| t0053915 | 25 | 1 ACTGGACTTGGAGCCAGAAGGCATC   | miRNA | miR-378  |
| t0054337 | 23 | 1 ACTGGACTTGGAAATCAGAAGGCA    | miRNA | miR-378  |
| t0054359 | 23 | 1 ACTGGACTTGGAAATCAGAAGGCG    | miRNA | miR-378  |
| t0055423 | 23 | 1 ACAGGACTTGGAGTCAGAAGGCA     | miRNA | miR-378  |
| t0056390 | 25 | 1 ACTGGACTTCGAGTCAGAAGGCATC   | miRNA | miR-378  |
| t0057585 | 23 | 1 ACTGGACTTGAAGTCAGAAGGCA     | miRNA | miR-378  |
| t0058133 | 23 | 1 ACTGGACTTGGAGTCAGCAGGCC     | miRNA | miR-378  |
| t0058147 | 23 | 1 ACTGGACTCGGAGTCAGAAGGCA     | miRNA | miR-378  |
| t0058325 | 23 | 1 ACTGGACTCGGAGTCAGAAGGTA     | miRNA | miR-378  |
| t0058846 | 21 | 1 ACTGGTCTTGGAGTCAGAAGG       | miRNA | miR-378  |
| t0059578 | 25 | 1 ACTGGACTTGGACTCAGAAGGCATC   | miRNA | miR-378  |
| t0060777 | 25 | 1 ACTGGACTTGGGGTCAGAAGGCATC   | miRNA | miR-378  |
| t0061105 | 25 | 1 ACTGGTCTTGGAGTCAGAAGGCATC   | miRNA | miR-378  |
| t0061241 | 23 | 1 ACTAGACTTGGAGTCAGAAGGCT     | miRNA | miR-378  |
| t0061360 | 23 | 1 ACTGGACTTCGAGTCAGAAGGCA     | miRNA | miR-378  |
| t0062734 | 25 | 1 ACCGGACTTGGAGTCAGAAGGCATC   | miRNA | miR-378  |
| t0063409 | 25 | 1 ACTGGACTTGGAGTCAGAAGGAATT   | miRNA | miR-378  |
| t0063761 | 22 | 1 CTGGACTTGGAGTCAGAAGGGA      | miRNA | miR-378  |
| t0063879 | 24 | 1 ACTGGACTTGGAGTCAGAAGGAAA    | miRNA | miR-378  |
| t0064298 | 23 | 1 CTGGACTTGGAGACAGAAGGCAA     | miRNA | miR-378  |
| t0064869 | 23 | 1 ACTGGTCTTGGAGTCAGAAGGCA     | miRNA | miR-378  |
| t0064930 | 21 | 1 ACTGGACTTGGGGTCAGAAGG       | miRNA | miR-378  |
| t0065277 | 23 | 1 ACTGGACTTGGAGTCAAAAGGCA     | miRNA | miR-378  |
| t0065932 | 25 | 1 CCTGGACTTGGAGTCAGAAGGCATC   | miRNA | miR-378  |
| t0066654 | 25 | 1 ACTGGACTTGGAGTCAGAAGGCGTC   | miRNA | miR-378  |
| t0068735 | 22 | 1 ACTGGACTTGGAGTCAGAACGC      | miRNA | miR-378  |
| t0070169 | 25 | 1 ACTGGACTTGGAGTCAGTAGGCATC   | miRNA | miR-378  |
| t0070358 | 23 | 1 ACTGGACTTGGAGTAAGAAGGCT     | miRNA | miR-378  |
| t0071525 | 22 | 1 CTGGACTTGGAGTCGGAAGGCA      | miRNA | miR-378  |
| t0071990 | 23 | 1 ACTGGACTTTGAGTCAGAAGGCT     | miRNA | miR-378  |
| t0073080 | 21 | 1 ACTGGACTGGGAGTCGGAAGG       | miRNA | miR-378  |
| t0074285 | 23 | 1 ACTGGACTTGGAGTCCGAAGGCA     | miRNA | miR-378  |
| t0074727 | 27 | 1 ACTGGACTTGGAGTCAGAAGGAATATC | miRNA | miR-378  |
| t0075402 | 23 | 1 ACTGGATTTGGAGTCAGAAGGCA     | miRNA | miR-378  |
| t0076249 | 25 | 1 ACTGGACTTGGAGTCAGAAGGCCTC   | miRNA | miR-378  |
| t0076291 | 20 | 1 ACTGGACTTGGAGTCAGCAG        | miRNA | miR-378  |
| t0077215 | 21 | 1 ACTGGACTTGGAGACAGAAGG       | miRNA | miR-378  |
| t0077646 | 26 | 1 ACTGGGCTTGGAGTCAGAAGGTAATC  | miRNA | miR-378  |
| t0077929 | 23 | 1 ACTGGCCTTGGAGTCAGAAGGCA     | miRNA | miR-378  |
| t0080145 | 21 | 1 ACTGGACTTGGACTCAGAAGG       | miRNA | miR-378  |
| t0080794 | 21 | 1 ACTAGACTTGGAGTCAGAAGG       | miRNA | miR-378  |
| t0081514 | 22 | 1 CTGAACTTGGAGTCAGAAGGCA      | miRNA | miR-378  |
| t0082269 | 24 | 1 ACTGGACTTGGAGTCAGAAAGCAA    | miRNA | miR-378  |
| t0082323 | 21 | 1 ACTGGACTTGGAGCCAGAAGG       | miRNA | miR-378  |
| t0082965 | 25 | 1 ACTGGACTTGGAGTCCGAAGGCATC   | miRNA | miR-378  |
| t0083497 | 25 | 1 TTTGTTTCGTTCCGGCTCGCGTGGATC | miRNA | miR-375  |
| t0084812 | 25 | 1 TTTGTTTCGTTCCGGCTCGCGTGAATT | miRNA | miR-375  |
| t0085147 | 22 | 1 GTATAATACAACCTGCTAAGTG      | miRNA | miR-374c |
| t0085603 | 21 | 1 TTATAATACAACCTGCTAAGT       | miRNA | miR-374c |
| t0085909 | 20 | 1 ATAATAAAACCTGCTAAGTG        | miRNA | miR-374c |



|          |    |                               |       |             |
|----------|----|-------------------------------|-------|-------------|
| t0087954 | 23 | 1 TTATAATACAACCTGATAAGGAA     | miRNA | miR-374a    |
| t0089419 | 22 | 1 TTATAATACAACCTGATAAGCG      | miRNA | miR-374a    |
| t0090782 | 21 | 1 TTATAATACAACCTGATCAGT       | miRNA | miR-374a    |
| t0090834 | 23 | 1 TTATAATACAACCTGATAAGTCA     | miRNA | miR-374a    |
| t0091095 | 27 | 1 ATATAATAAACCTGCTAAGTGAAAAA  | miRNA | miR-374     |
| t0091393 | 22 | 1 ATATAATACAACCTGCCAAGTG      | miRNA | miR-374     |
| t0091820 | 22 | 1 ATATAATACACCCTGCTAAGTG      | miRNA | miR-374     |
| t0093116 | 23 | 1 ATATAATACAACCTGCTAAGGGA     | miRNA | miR-374     |
| t0059005 | 22 | 1 ATATAATACAACCTGCTAAATG      | miRNA | miR-374     |
| t0064621 | 21 | 1 ATATAATACAACCTGCTCAGT       | miRNA | miR-374     |
| t0057639 | 21 | 1 ATATAATACAACCCGCTAAGT       | miRNA | miR-374     |
| t0059633 | 21 | 1 ATAGAATACAACCTGCTAAGT       | miRNA | miR-374     |
| t0067061 | 22 | 1 ATGTAATACATCCTGCTAAGTG      | miRNA | miR-374     |
| t0084369 | 22 | 1 ATATAATACAACCTGCTTAGTG      | miRNA | miR-374     |
| t0086117 | 22 | 1 ATATAATACAGCCTGCTAAGTG      | miRNA | miR-374     |
| t0088042 | 20 | 1 ATATAATACAACCTGCTCAG        | miRNA | miR-374     |
| t0092626 | 22 | 1 ATATAATACGACCTGCTAAGTG      | miRNA | miR-374     |
| t0042934 | 21 | 1 ATATAATATAACCTGCTAAGT       | miRNA | miR-374     |
| t0054003 | 20 | 1 ATATAATAAACCTGCTAAG         | miRNA | miR-374     |
| t0054132 | 21 | 1 ATATAATACAATCTGCTAAGT       | miRNA | miR-374     |
| t0055185 | 22 | 1 ATATAATGCAACCTGCTAAGTG      | miRNA | miR-374     |
| t0055982 | 27 | 1 ATATAATACAACCTGCTACGTGAAAAA | miRNA | miR-374     |
| t0056616 | 20 | 1 ATATAATACAACCTGCTAGG        | miRNA | miR-374     |
| t0058473 | 22 | 1 ATATAATACAACCTGCTAAGAG      | miRNA | miR-374     |
| t0059116 | 22 | 1 ATATAATCAACCTGCTAAGTG       | miRNA | miR-374     |
| t0059514 | 22 | 1 ATATAATACAACCTCCTAAGTG      | miRNA | miR-374     |
| t0060826 | 21 | 1 ATATAATACAACCTGATAAGT       | miRNA | miR-374     |
| t0060834 | 19 | 1 TGAGGATATGGCAGGGGAG         | miRNA | miR-3679-5p |
| t0064864 | 23 | 1 TGAGGATATGGCAGGGAAGGGGT     | miRNA | miR-3679-5p |
| t0069170 | 21 | 1 AGGGACTTTCAGGGGCAGCCG       | miRNA | miR-365*    |
| t0069415 | 20 | 1 AATTGCACGGTACCCATCTG        | miRNA | miR-363     |
| t0070483 | 20 | 1 TATTGCACGGTATCCATCTG        | miRNA | miR-363     |
| t0075586 | 22 | 1 AATTGCAAGGTATCCATCTGTA      | miRNA | miR-363     |
| t0076709 | 22 | 1 AATTGAACGGTATCCATCTGTA      | miRNA | miR-363     |
| t0084997 | 20 | 1 AATTGCACGGTATACATCTG        | miRNA | miR-363     |
| t0086347 | 22 | 1 AATTGCCCGGTATCCATCTGTA      | miRNA | miR-363     |
| t0087839 | 19 | 1 AATTGCACGGTATCGATCT         | miRNA | miR-363     |
| t0089360 | 20 | 1 AATTGGACGGTATCCATCTG        | miRNA | miR-363     |
| t0090128 | 20 | 1 AATTGCACTGTATCCATCTT        | miRNA | miR-363     |
| t0092556 | 21 | 1 ATTGCACGGTATACATCTGTA       | miRNA | miR-363     |
| t0046145 | 18 | 1 AATTGCACGGTATCAATA          | miRNA | miR-363     |
| t0056535 | 23 | 1 AATTGCACGGGATCCATCTGTAA     | miRNA | miR-363     |
| t0087800 | 19 | 1 AATTGCACGGTATCAATCT         | miRNA | miR-363     |
| t0043697 | 22 | 1 TATTGCACGGTATCCATCTGTA      | miRNA | miR-363     |
| t0045253 | 19 | 1 AATTGCACGGTACCCATCT         | miRNA | miR-363     |
| t0045575 | 23 | 1 ATTGAACGGTATCCATCTGTATT     | miRNA | miR-363     |
| t0047559 | 22 | 1 AATTGCACGGTATCCATCTGCA      | miRNA | miR-363     |
| t0047979 | 22 | 1 AATTGCACGGTATCAATCTGTA      | miRNA | miR-363     |
| t0049616 | 23 | 1 AATTGCACGGTATCCATCTGCAA     | miRNA | miR-363     |
| t0052303 | 20 | 1 AATTGAACGGTATCCATCTG        | miRNA | miR-363     |
| t0056182 | 22 | 1 AATTGCACGGTATCTATCTGTA      | miRNA | miR-363     |
| t0056926 | 22 | 1 AATTGCACGGTATACATCTGTA      | miRNA | miR-363     |
| t0057236 | 20 | 1 AATTGCACGGTATCCACCTG        | miRNA | miR-363     |
| t0060590 | 23 | 1 AATTGCACGCTATCCATCTGTAG     | miRNA | miR-363     |
| t0061623 | 21 | 1 AATTGCACGGTATCAATCTGT       | miRNA | miR-363     |
| t0062089 | 20 | 1 AATTGCAAGGTATCCATCTA        | miRNA | miR-363     |
| t0062887 | 22 | 1 AATTGCACCGTATCCATCAGTA      | miRNA | miR-363     |
| t0062893 | 19 | 1 AATTGCACGGGATCCATCT         | miRNA | miR-363     |

|          |    |                                 |       |             |
|----------|----|---------------------------------|-------|-------------|
| t0064176 | 23 | 1 AATTGCACGGTGTCCATCTGTAT       | miRNA | miR-363     |
| t0067341 | 21 | 1 ATTCACGGGATCCATCTGTA          | miRNA | miR-363     |
| t0068540 | 19 | 1 AATTGCACGGAATCCATCT           | miRNA | miR-363     |
| t0072450 | 22 | 1 AATTGCACGGTATCCATCTGAA        | miRNA | miR-363     |
| t0073347 | 23 | 1 AATCCTCGAACCTAGGTGTGAG        | miRNA | miR-362-5p  |
| t0074680 | 23 | 1 AATCCTTGGAACCTAGATGTGAG       | miRNA | miR-362-5p  |
| t0081766 | 23 | 1 AATCCTTGGAACCTAGGTGTGCG       | miRNA | miR-362-5p  |
| t0086177 | 23 | 1 CCGGGGGTGGGGTTCGGCGGGGG       | miRNA | miR-3621    |
| t0086422 | 21 | 1 CCGGGGGTGGGGTAGGCGGAT         | miRNA | miR-3621    |
| t0086745 | 22 | 1 GGTGATGTCGGCGGTATAGGCG        | miRNA | miR-3621    |
| t0086924 | 19 | 1 CCGGGGGGGGGTTCGGCGG           | miRNA | miR-3621    |
| t0087697 | 20 | 1 CCGGGGGTGGGGGCGGCGGG          | miRNA | miR-3621    |
| t0091122 | 19 | 1 TCTCTCGGCTCCTCGCGGC           | miRNA | miR-3615    |
| t0091285 | 20 | 1 TCTCTCGGCCCTCGCGGCT           | miRNA | miR-3615    |
| t0091414 | 20 | 1 TCTCTCGGCTCCTCGAGGCT          | miRNA | miR-3615    |
| t0092075 | 21 | 1 TGTTGTACTTTTTTTTTTTTGT        | miRNA | miR-3613-5p |
| t0092638 | 22 | 1 ACAAAAAAAAAAAGCACAACCCT       | miRNA | miR-3613-3p |
| t0048576 | 23 | 1 ACAAAAAAAAAAAGCCCAACCCT       | miRNA | miR-3613-3p |
| t0049173 | 22 | 1 ACAAAAACAAAGCCCAACCCT         | miRNA | miR-3613-3p |
| t0061865 | 24 | 1 ACAAAAAAAAAAAGCCCAACCCT       | miRNA | miR-3613-3p |
| t0050044 | 22 | 1 ACAAAAAAAAAAAGCCACCCCT        | miRNA | miR-3613-3p |
| t0050177 | 21 | 1 TGAGGATGGATTGCAAGGAAG         | miRNA | miR-3605-5p |
| t0051563 | 21 | 1 TGAGGATGGATAGCAAGGCAG         | miRNA | miR-3605-5p |
| t0053148 | 21 | 1 TGAGGATGGATAGCACGGAAG         | miRNA | miR-3605-5p |
| t0065773 | 23 | 1 GATGAGGATGGATAGCACGGAAG       | miRNA | miR-3605-5p |
| t0082246 | 22 | 1 TGAGGTTGGATAGCAAGGAAGT        | miRNA | miR-3605-5p |
| t0087099 | 21 | 1 TGAGGATGGATAGCAGGGAAG         | miRNA | miR-3605-5p |
| t0087175 | 21 | 1 TGAGGATGGATAGCAAGGGAG         | miRNA | miR-3605-5p |
| t0091203 | 22 | 1 TACTAGACTGAAGCTCCTCGAG        | miRNA | miR-3586-3p |
| t0055247 | 23 | 1 CTAGACTGAAGCTCCTCGAGGTA       | miRNA | miR-3586-3p |
| t0062898 | 26 | 1 AAATTTGAAGACTGAAGTGGAGAAGG    | miRNA | miR-3526    |
| t0063891 | 24 | 1 TTGAAGACTGAAGTCGAGAAGGGT      | miRNA | miR-3526    |
| t0072857 | 24 | 1 TGAAGACTGAAGTGGTGAAGGGTT      | miRNA | miR-3526    |
| t0075656 | 28 | 1 AACTTTGAAGAATGAAGTGGAGAAGGGT  | miRNA | miR-3526    |
| t0050390 | 27 | 1 AACTTTGAAGACTGAAGTGGAGAACGG   | miRNA | miR-3526    |
| t0067949 | 24 | 1 CTTTGAAGACTGAAGTGGCGAAGG      | miRNA | miR-3526    |
| t0067972 | 20 | 1 AACTTTGAAGAATGAAGTGG          | miRNA | miR-3526    |
| t0070375 | 29 | 1 AACCTTGAAGACTGAAGTGGAGAAGGGT  | miRNA | miR-3526    |
| t0075601 | 24 | 1 TGAAGACTGAAGTGGCGAAGGGTT      | miRNA | miR-3526    |
| t0076153 | 28 | 1 TGAAGACTGAAGTGGAGAAGGGGTTCTT  | miRNA | miR-3526    |
| t0082171 | 27 | 1 AACTTTGAAGACTGAAGTGGTGAAGGG   | miRNA | miR-3526    |
| t0049837 | 27 | 1 AACTTCGAAGACTGAAGTGGAGAAGGG   | miRNA | miR-3526    |
| t0056327 | 21 | 1 TGAAGACTGAAGTGAAGAAGG         | miRNA | miR-3526    |
| t0041004 | 26 | 1 AGCTTTGAAGACTGAAGTGGAGAAGG    | miRNA | miR-3526    |
| t0041205 | 24 | 1 CTTTGAAGACTGAAGTGGAGACGG      | miRNA | miR-3526    |
| t0042054 | 22 | 1 TGAAGACTGAAGTGGAAAAGGG        | miRNA | miR-3526    |
| t0042185 | 21 | 1 AACTTTGAAGACTGAAGAGGA         | miRNA | miR-3526    |
| t0042255 | 29 | 1 AACTTTGAAGACTGAAGTGGAGTAGGGTT | miRNA | miR-3526    |
| t0042674 | 28 | 1 AACTTTGAAGTCTGAAGTGGCGAAGGGT  | miRNA | miR-3526    |
| t0042814 | 28 | 1 AACTTTGAAGACTGAAGTGGAGCAGGGT  | miRNA | miR-3526    |
| t0042947 | 29 | 1 AACTTTGAAGACTGAAGTGGCGAAGGGG  | miRNA | miR-3526    |
| t0043174 | 28 | 1 AACTTTGAAGACTGAAGTGGAGCAGGGG  | miRNA | miR-3526    |
| t0043476 | 24 | 1 GAAGACTGAAGTGGAGAAGGGCTT      | miRNA | miR-3526    |
| t0043780 | 23 | 1 TGAAGACTCAAGTGGAGAAGGGT       | miRNA | miR-3526    |
| t0043786 | 22 | 1 AACTTTGAAGACTGAAGGGGAG        | miRNA | miR-3526    |
| t0044370 | 27 | 1 AACTTTGAAGATTGAAGTGGAGAAGGG   | miRNA | miR-3526    |
| t0044515 | 23 | 1 TGAAGACTGAAGTGGAGCAGGGC       | miRNA | miR-3526    |
| t0044777 | 28 | 1 AACTTCGAAGACTGAAGTGGCGAAGGGT  | miRNA | miR-3526    |

|          |    |                                |       |          |
|----------|----|--------------------------------|-------|----------|
| t0044944 | 21 | 1 AACTTTGAAGACTAAAGTGG         | miRNA | miR-3526 |
| t0045068 | 29 | 1 AACTTTGAAGACTGAAGTGGAGAATGGT | miRNA | miR-3526 |
| t0045140 | 23 | 1 TTGAAGACTCAAGTGGAGAAGGG      | miRNA | miR-3526 |
| t0045545 | 28 | 1 AACTTCGAAGACTGAAGTGGAGAAGGGT | miRNA | miR-3526 |
| t0045609 | 24 | 1 TTTGAAGACTGAAGTGGAGGAGGG     | miRNA | miR-3526 |
| t0045703 | 27 | 1 ACTTTGAGGACTGAAGTGGAGAAGGGT  | miRNA | miR-3526 |
| t0045710 | 22 | 1 TTGAAGACTGAGGTGGAGAAGG       | miRNA | miR-3526 |
| t0045796 | 28 | 1 AACTTTGAAGATTGAAGTGGAGAAGGGT | miRNA | miR-3526 |
| t0045915 | 22 | 1 TGAAGACTGAAGTAGAGAAGTG       | miRNA | miR-3526 |
| t0046148 | 26 | 1 CTTTGAAGACTGAAGTGGAGACGGGT   | miRNA | miR-3526 |
| t0046321 | 22 | 1 AAGACTGAAGTGGAGACGGGTT       | miRNA | miR-3526 |
| t0046648 | 19 | 1 AACTTTGAAGACTGAAGGG          | miRNA | miR-3526 |
| t0046833 | 26 | 1 TTGAAGACTGAAGTGGGGAAGGGTTT   | miRNA | miR-3526 |
| t0047087 | 23 | 1 GAAGACTGAAGTGGAGACGGGTT      | miRNA | miR-3526 |
| t0047139 | 22 | 1 GAAGACTGAAGTGGAGAAGGGC       | miRNA | miR-3526 |
| t0047781 | 23 | 1 GAAGACTGAAGTGGAGAAGGGAT      | miRNA | miR-3526 |
| t0047877 | 23 | 1 TGAAGACTGAAGAGGAGAAGGGT      | miRNA | miR-3526 |
| t0047936 | 26 | 1 AACTCTGAAGACTGAAGTGGAGAAGG   | miRNA | miR-3526 |
| t0048874 | 21 | 1 AACTTCGAAGACTGAAGTGG         | miRNA | miR-3526 |
| t0049296 | 26 | 1 AACTTTGAAGACTGGAGTGGAGAAGG   | miRNA | miR-3526 |
| t0050046 | 27 | 1 AACTTTAAAGACTGAAGTGGAGAAGGG  | miRNA | miR-3526 |
| t0050139 | 21 | 1 AACTTTGGAGACTGAAGTGG         | miRNA | miR-3526 |
| t0050418 | 27 | 1 AACTTTGAAGACTGAAGTGGAGAAGGT  | miRNA | miR-3526 |
| t0050599 | 28 | 1 AACTTTGAAGACTGAAGTGGAGAGGGGT | miRNA | miR-3526 |
| t0051064 | 29 | 1 AACTTTGAAGACCGAAGTGGAGAAGGGT | miRNA | miR-3526 |
| t0051224 | 29 | 1 AAATTTGAAGACTGAAGTGGAGAAGGGT | miRNA | miR-3526 |
| t0051547 | 24 | 1 TGAAGACTGAAGTGGAGACGGGTT     | miRNA | miR-3526 |
| t0051772 | 25 | 1 TTGAAGACTGAAGTGGAGAAGGGCT    | miRNA | miR-3526 |
| t0052136 | 27 | 1 AACTTTGAAGACTGACGTGGAGAAGGG  | miRNA | miR-3526 |
| t0052264 | 23 | 1 GAAGACTGAAGTGGAGAAGGGCT      | miRNA | miR-3526 |
| t0052382 | 27 | 1 AACTTTGAAGACTGAAGTGGAGAAGAG  | miRNA | miR-3526 |
| t0052646 | 27 | 1 AACTTTGAAGACTGAAGTGGGGAAGGG  | miRNA | miR-3526 |
| t0052946 | 26 | 1 AACTTTGAAGACTGAAGAGGAGAAGG   | miRNA | miR-3526 |
| t0053214 | 27 | 1 AAATTTGAAGACTGAAGTGGAGAAGGG  | miRNA | miR-3526 |
| t0054207 | 28 | 1 AACTTTGAAGACTGAAGTAGAGAAGGGT | miRNA | miR-3526 |
| t0054471 | 23 | 1 TGAAGACTGAAGTGGAGAGGGGT      | miRNA | miR-3526 |
| t0054607 | 21 | 1 GAAGACTGAAGTGGAGACGGG        | miRNA | miR-3526 |
| t0054776 | 22 | 1 GAAGACTGAAGTGGAGACGGGT       | miRNA | miR-3526 |
| t0054807 | 29 | 1 AACTTTGAAGACTGAAGTGGAGAAGGGC | miRNA | miR-3526 |
| t0054854 | 25 | 1 TGAAGACTGAAGCGGAGAAGGGGTT    | miRNA | miR-3526 |
| t0055327 | 22 | 1 GAAGACTGAAGTGGAGAAGAGT       | miRNA | miR-3526 |
| t0056089 | 25 | 1 TTGAAGACTGGAGTGGAGAAGGGTT    | miRNA | miR-3526 |
| t0056172 | 27 | 1 TGAAGACTGAAGTGGAGAAGGGATTCT  | miRNA | miR-3526 |
| t0056254 | 26 | 1 AACTTTGAAGGCTGAAGTGGAGAAGG   | miRNA | miR-3526 |
| t0056410 | 29 | 1 AACTTTGAAGACTGAAGTGGAGGAGGGT | miRNA | miR-3526 |
| t0056549 | 21 | 1 AACTTTGAAAAGTGAAGTGG         | miRNA | miR-3526 |
| t0057079 | 24 | 1 TTGAAGACTGAAGTTGAGAACGGA     | miRNA | miR-3526 |
| t0057330 | 24 | 1 TGAAGACTGAAGTGGAGGAGGGTT     | miRNA | miR-3526 |
| t0057413 | 26 | 1 ACTTTGAAGACTGAAGTGGAGACGGG   | miRNA | miR-3526 |
| t0057607 | 30 | 1 AACTTTGAAGACTGAAGCGGAGAAGGGT | miRNA | miR-3526 |
| t0057958 | 21 | 1 AACTTTGAAGACTGAAGCGGA        | miRNA | miR-3526 |
| t0060004 | 24 | 1 TTGAAGACTGAAGTGGTGAAGGGT     | miRNA | miR-3526 |
| t0060016 | 27 | 1 ACTTTGAAGACTGAAGTAGAGAAGGGT  | miRNA | miR-3526 |
| t0060305 | 25 | 1 TGAAGACTGAAGAGGAGAAGGGTTT    | miRNA | miR-3526 |
| t0061244 | 20 | 1 TGAAGACTGAAGTGGAGCAG         | miRNA | miR-3526 |
| t0061254 | 23 | 1 TGAAGACTGAAGTGGAGAAGGGT      | miRNA | miR-3526 |
| t0061370 | 20 | 1 AACTTTGAAGCCTGAAGTGG         | miRNA | miR-3526 |
| t0061681 | 24 | 1 TGAAGACTGGAGTGGAGAAGGGTT     | miRNA | miR-3526 |

|          |    |                                 |       |          |
|----------|----|---------------------------------|-------|----------|
| t0061748 | 23 | 1 TGAAGACTGGAGGGGAGAAGGGT       | miRNA | miR-3526 |
| t0061796 | 24 | 1 TTGAAGACTGACGTGGAGAAGGGT      | miRNA | miR-3526 |
| t0062123 | 28 | 1 AAGTTTGAAGACTGAAGTGGAGAAGGGT  | miRNA | miR-3526 |
| t0062134 | 21 | 1 AACTTTGAAGGCTGAAGTGGA         | miRNA | miR-3526 |
| t0062369 | 21 | 1 AACTTTGAAGAATGAAGTGGA         | miRNA | miR-3526 |
| t0062378 | 24 | 1 TTGAAGACTGAAGGGGAGAAGGGT      | miRNA | miR-3526 |
| t0062579 | 23 | 1 TGAAGACTGAAGTGGAGGAGGGT       | miRNA | miR-3526 |
| t0063435 | 28 | 1 AACTTTGAATACTGAAGTGGAGAAGGGT  | miRNA | miR-3526 |
| t0063491 | 24 | 1 TTGAAGATTGAAGTGGAGAAGGGG      | miRNA | miR-3526 |
| t0063652 | 24 | 1 CTTTGAAGACTGAAGTGGGGAAGG      | miRNA | miR-3526 |
| t0063709 | 29 | 1 GACTTTGAAGACTGAAGTGGCGAAGGGT  | miRNA | miR-3526 |
| t0064006 | 24 | 1 CTTGAAGACTGAAGTGGAGGAGGG      | miRNA | miR-3526 |
| t0064931 | 30 | 1 ACTTTGGAGACTGAAGTGGAGAAGGGTT  | miRNA | miR-3526 |
| t0064972 | 28 | 1 AACTTTGAAGACTGAAGTGGAGAAGGAT  | miRNA | miR-3526 |
| t0065075 | 26 | 1 TTGAAGACTGAAGAGGAGAAGGGTTT    | miRNA | miR-3526 |
| t0065772 | 22 | 1 TGAAGACTGGAGTGGAGAAGGG        | miRNA | miR-3526 |
| t0065841 | 29 | 1 AACTTTGAAGACTGAAGCGGAGAAGGGT  | miRNA | miR-3526 |
| t0066201 | 18 | 1 AACTTTGAAGAGTGAAGT            | miRNA | miR-3526 |
| t0066781 | 29 | 1 GACTTTGAAGACTGAAGGGGAGAAGGGT  | miRNA | miR-3526 |
| t0067700 | 24 | 1 TTGAAGCCTGAAGTGGAGAAGGTT      | miRNA | miR-3526 |
| t0068428 | 24 | 1 GAAGACTGAAGTGGAGAAGGGATT      | miRNA | miR-3526 |
| t0068815 | 27 | 1 AACTTTGAAGAATGAAGTGGTGAAGGG   | miRNA | miR-3526 |
| t0068866 | 22 | 1 TGAAGACTGAAGTGGAGACGTG        | miRNA | miR-3526 |
| t0069148 | 27 | 1 ACTTTGAAGACTGAGGTGGAGAAGGGT   | miRNA | miR-3526 |
| t0069256 | 28 | 1 AACTTTGAAGTCTGAAGTGGAGAAGGGT  | miRNA | miR-3526 |
| t0069956 | 26 | 1 AACTTTGAAGACTGAAGTGGGGAAGG    | miRNA | miR-3526 |
| t0070096 | 20 | 1 AACTTTGAAGACTGAAGCGG          | miRNA | miR-3526 |
| t0070121 | 27 | 1 GACTTTGAAGACTGAAGTGGAGAAGGG   | miRNA | miR-3526 |
| t0070581 | 27 | 1 TGAAGACTGAAGGGGAGAAGGGGTTCT   | miRNA | miR-3526 |
| t0070703 | 22 | 1 GAGGACTGAAGTGGGGAAGGG         | miRNA | miR-3526 |
| t0070794 | 24 | 1 GAAGACTGAAGTGGAGACGGGTTT      | miRNA | miR-3526 |
| t0070817 | 28 | 1 AACTTTGAAGACTAAAGTGGAGAAGGGT  | miRNA | miR-3526 |
| t0071206 | 28 | 1 AACTTTGAAAAGTGAAGTGGAGAAGGGT  | miRNA | miR-3526 |
| t0071381 | 27 | 1 AACTTTGAAGACTGAAGTGGAGCAGGG   | miRNA | miR-3526 |
| t0071448 | 26 | 1 CTTTGAAGACTGAAGTGGAGCAGGGT    | miRNA | miR-3526 |
| t0071456 | 26 | 1 AACTTGAAGACTGAAGTGGAGAAGG     | miRNA | miR-3526 |
| t0071588 | 19 | 1 AACTTTGAAGACTGAAGCG           | miRNA | miR-3526 |
| t0072615 | 25 | 1 TGAAGACTGAAGTGGAGAAAGGTTT     | miRNA | miR-3526 |
| t0073090 | 29 | 1 AACTTTGAAGACTAAAGTGGAGAAGGGT  | miRNA | miR-3526 |
| t0073206 | 22 | 1 TGAAGACTGAAGAGGAGAAGGG        | miRNA | miR-3526 |
| t0073234 | 21 | 1 AACTTTGAAGACCGAAGTGGA         | miRNA | miR-3526 |
| t0073321 | 25 | 1 TTGAAGACTGAAGTGGGGAAGGGTT     | miRNA | miR-3526 |
| t0073383 | 24 | 1 TGAGGACTGAAGTGGAGAAGGGTA      | miRNA | miR-3526 |
| t0073549 | 30 | 1 ACTTTGAAGACTGAAGTGGAGACGGGTTT | miRNA | miR-3526 |
| t0073906 | 27 | 1 ACCTTTGAAGACTGAAGTGGAGAAGGG   | miRNA | miR-3526 |
| t0074077 | 26 | 1 ACTTTGAAGACTGAAGGGGAGAAGGG    | miRNA | miR-3526 |
| t0074413 | 24 | 1 TGAAGACTGCAGTGGAGAAGGGTT      | miRNA | miR-3526 |
| t0074799 | 28 | 1 CACTTTGAAGACTGAAGTGGAGAAGGGT  | miRNA | miR-3526 |
| t0075021 | 23 | 1 TTGAAGACTGAAGTGGAGAGGGT       | miRNA | miR-3526 |
| t0075190 | 23 | 1 TTGAAGACTGAAGTGGGGAAGGG       | miRNA | miR-3526 |
| t0075286 | 30 | 1 ACTTTGAAGACTGAAGTGGAGAAGGGGT  | miRNA | miR-3526 |
| t0075343 | 27 | 1 TGAAGACCGAAGTGGAGAAGGGTTTCT   | miRNA | miR-3526 |
| t0075575 | 21 | 1 TGAAGACTGAAGTGGTGAAGG         | miRNA | miR-3526 |
| t0076140 | 27 | 1 AACTTTGAAGCCTGAAGTGGAGAAGGG   | miRNA | miR-3526 |
| t0077096 | 27 | 1 AACATTGAAGACTGAAGTGGAGAAGGG   | miRNA | miR-3526 |
| t0077793 | 28 | 1 AAATTTGAAGACTGAAGTGGAGAAGGGT  | miRNA | miR-3526 |
| t0078260 | 24 | 1 TGAAGACTGAGGTGGAGAAGGGTT      | miRNA | miR-3526 |
| t0078265 | 29 | 1 AACTTTGAAGACTGACGTGGAGAAGGGT  | miRNA | miR-3526 |

|          |    |                                |       |          |
|----------|----|--------------------------------|-------|----------|
| t0078442 | 26 | 1 CTTTGAAGAATGAAGTGGAGAAGGGT   | miRNA | miR-3526 |
| t0078571 | 27 | 1 TGAAGACTGAAGTTGAGGAGGGTTTCT  | miRNA | miR-3526 |
| t0078900 | 20 | 1 AACTTTGAAGACCGAAGTGG         | miRNA | miR-3526 |
| t0078972 | 20 | 1 GAAGACTGAAGTGGAGAGGG         | miRNA | miR-3526 |
| t0079165 | 22 | 1 TGAAGACTGAAGGGGAGAAGGG       | miRNA | miR-3526 |
| t0079351 | 26 | 1 AACTTTGAGGACTGAAGTGGAGAAGG   | miRNA | miR-3526 |
| t0079452 | 28 | 1 AACTTTGAGGACTGAAGTGGAGAAGGGT | miRNA | miR-3526 |
| t0079586 | 25 | 1 TTGAAGGCTGAAGTGGAGAAGGGTT    | miRNA | miR-3526 |
| t0080050 | 24 | 1 CTTTGAAGACTGAAGGGGAGAAGG     | miRNA | miR-3526 |
| t0080090 | 28 | 1 AACTTTGAAGACTGAAGTGGTGAAGGGT | miRNA | miR-3526 |
| t0080199 | 27 | 1 TGAAGACTGAAGTGGAGAAGGGCTTCT  | miRNA | miR-3526 |
| t0080395 | 26 | 1 AACTTTGGAGACTGAAGTGGAGAAGG   | miRNA | miR-3526 |
| t0080624 | 27 | 1 AACTTTGAGGACTGAAGTGGAGAAGGG  | miRNA | miR-3526 |
| t0081283 | 24 | 1 TTGAAGACTGAGGTGGAGAAGGGT     | miRNA | miR-3526 |
| t0081818 | 28 | 1 AACTTTGAAGACTGAAGTGGAGAACGGT | miRNA | miR-3526 |
| t0082034 | 22 | 1 AACTTTGAAGACTGAAATGGAG       | miRNA | miR-3526 |
| t0082335 | 25 | 1 TTGAATACTGAAGTGGAGAAGGGTT    | miRNA | miR-3526 |
| t0082366 | 26 | 1 CTTTGAAGACTGAAGTGGAGGAGGGT   | miRNA | miR-3526 |
| t0082404 | 26 | 1 TTGAAGACCGAAGTGGAGAAGGGTTT   | miRNA | miR-3526 |
| t0082604 | 25 | 1 TGAAGACTGAAGTGGATAAGGGGTT    | miRNA | miR-3526 |
| t0082764 | 21 | 1 TGAAGACTAAAGTGGAGAAGG        | miRNA | miR-3526 |
| t0082791 | 28 | 1 AACTTTGAAGACTGCAGGGGAGAAGGGC | miRNA | miR-3526 |
| t0083509 | 24 | 1 TTTGAAGACTGAAGGGGAGAAGGG     | miRNA | miR-3526 |
| t0083920 | 27 | 1 TGAAGACTGAAGTTGAGAAGGGCTTCT  | miRNA | miR-3526 |
| t0084180 | 29 | 1 AACTTTGAAGACTGAAGGGGAGAAGGGT | miRNA | miR-3526 |
| t0084471 | 29 | 1 AACTTTGAAGACTGAACTGGAGAAGGGT | miRNA | miR-3526 |
| t0084621 | 23 | 1 TGAAGACTGAAGTGGAGAACGGT      | miRNA | miR-3526 |
| t0084803 | 24 | 1 TGAAGACTGAAGTGGAGAGGGGTT     | miRNA | miR-3526 |
| t0085104 | 23 | 1 TGAAGACTGAAGTGGAGAAAGGT      | miRNA | miR-3526 |
| t0085327 | 26 | 1 AACTTTGAAGACTGAAGTGGTGAAGG   | miRNA | miR-3526 |
| t0085745 | 23 | 1 TTGAAGACTGAAGCGGAGAAGGG      | miRNA | miR-3526 |
| t0086524 | 28 | 1 AACTTTGAAGACTGAAGTGGAGAAGGGC | miRNA | miR-3526 |
| t0086545 | 26 | 1 CTTTGAAGACTGAAGTGGGAAGGGT    | miRNA | miR-3526 |
| t0086586 | 20 | 1 AACTTTGAAGATTGAAGTGG         | miRNA | miR-3526 |
| t0087079 | 26 | 1 CTTTGAAGACTGAAGCGGAGAAGGGT   | miRNA | miR-3526 |
| t0087132 | 24 | 1 TGAAGACTGAAGTGGAGAATGGTT     | miRNA | miR-3526 |
| t0087218 | 21 | 1 GAAGACTGAAGTGGAGAGGGG        | miRNA | miR-3526 |
| t0088060 | 27 | 1 AACTTTGCAGACTGAAGTGGAGAAGGG  | miRNA | miR-3526 |
| t0088127 | 25 | 1 TTGAAGACTGAAGTAGAGAAGGGTT    | miRNA | miR-3526 |
| t0088200 | 27 | 1 TGAAGACTGAAGTGGAGGAGGGTTTCT  | miRNA | miR-3526 |
| t0088250 | 28 | 1 AACTTTGAAGACTGAAGGGGAGAAGGGA | miRNA | miR-3526 |
| t0088281 | 27 | 1 AACTTTGAAGACCGAAGTGGAGAAGGG  | miRNA | miR-3526 |
| t0088506 | 29 | 1 AACTCTGAAGACTGAAGTGGAGAAGGGT | miRNA | miR-3526 |
| t0088697 | 23 | 1 TGAAGACCGAAGTGGAGAAGGGT      | miRNA | miR-3526 |
| t0088716 | 21 | 1 TGAAGACTGAAGCGGAGAAGG        | miRNA | miR-3526 |
| t0089445 | 25 | 1 TGAAGACTGGAGTGGAGAAGGGTTT    | miRNA | miR-3526 |
| t0089822 | 27 | 1 TGAAGACTGAAGTGGAGAAGGGTTTGT  | miRNA | miR-3526 |
| t0089847 | 26 | 1 ACTTTGAAGACTGAAGTGGGGAAGGG   | miRNA | miR-3526 |
| t0090474 | 21 | 1 GTAGGAGGTTGCATAGTAGAG        | miRNA | miR-352  |
| t0090524 | 19 | 1 AGAGTAGTAGGTTGCATAG          | miRNA | miR-352  |
| t0090824 | 20 | 1 AGAGTAGTAGGTTGCATAGT         | miRNA | miR-352  |
| t0090978 | 21 | 1 AGAGGTGTAGGTTGCATAGTT        | miRNA | miR-352  |
| t0091125 | 22 | 1 AAGAGAATAGGGCATGGGTATT       | miRNA | miR-3507 |
| t0091343 | 21 | 1 TGACTGTCTGGACTCAGTAGT        | miRNA | miR-3505 |
| t0091517 | 20 | 1 TGACTGTCTGGACACAGTAG         | miRNA | miR-3505 |
| t0091671 | 23 | 1 TGGAATTCAGGACGCGCGTTTTT      | miRNA | miR-3503 |
| t0092210 | 24 | 1 AGTGGAAATCCAGGACGCGCGTTAT    | miRNA | miR-3503 |
| t0092503 | 22 | 1 TGGAATCCAGGACGCGCGTTTT       | miRNA | miR-3503 |

|          |    |                              |       |          |
|----------|----|------------------------------|-------|----------|
| t0092819 | 22 | 1 AAGTGAATCCAGGATGCGCTT      | miRNA | miR-3503 |
| t0093119 | 26 | 1 GTGGAATCCAGGACGCGCTTATTCT  | miRNA | miR-3503 |
| t0093255 | 24 | 1 AAGTGAATCCAGGACGCGCTTTT    | miRNA | miR-3503 |
| t0045141 | 22 | 1 AAGTGAATCCAGGACGCGTTT      | miRNA | miR-3503 |
| t0061417 | 20 | 1 GTGGAATCCAGGACGCGCGT       | miRNA | miR-3503 |
| t0071576 | 20 | 1 AAGTGAATCCAGGACGCGC        | miRNA | miR-3503 |
| t0091605 | 20 | 1 CAAGTGAATCAAGGACGCG        | miRNA | miR-3503 |
| t0079897 | 21 | 1 AGCGGAATCCAGGACGCGCGT      | miRNA | miR-3503 |
| t0060747 | 23 | 1 AGTGAATCCAGGACGCGCGTTT     | miRNA | miR-3503 |
| t0068016 | 24 | 1 GTGGAATCCAGGACGCGCGTTTTT   | miRNA | miR-3503 |
| t0041176 | 26 | 1 AGTGAATCCAGGACGCGCGTTTTTT  | miRNA | miR-3503 |
| t0041544 | 26 | 1 AAGTGAATCCAGGAAGCGCGTGTTT  | miRNA | miR-3503 |
| t0044980 | 22 | 1 GTGGAATCTAGGACGCGCGTTT     | miRNA | miR-3503 |
| t0050054 | 26 | 1 AAGTGAATCCAGGACGCGCGGGTTT  | miRNA | miR-3503 |
| t0052499 | 21 | 1 GTGACGATCGTACATGTCTTT      | miRNA | miR-3502 |
| t0054103 | 22 | 1 AACCTTGTAGTTTCGTTGTGTT     | miRNA | miR-3501 |
| t0058259 | 20 | 1 AGGAGATCGGTAGTAGATTG       | miRNA | miR-3500 |
| t0060541 | 22 | 1 AGGAGATTGGTGGTAGATTGTT     | miRNA | miR-3500 |
| t0062701 | 23 | 1 AGGAGATCGGTGGTAGATTGTAT    | miRNA | miR-3500 |
| t0069386 | 26 | 1 AGGCAGTGTAGTTAGCTGATTGCAAC | miRNA | miR-34c  |
| t0071829 | 23 | 1 TGGATGGTGTATGCATGGCCGGTT   | miRNA | miR-34a  |
| t0072099 | 21 | 1 TGGATGGTGTATGCATGGTCGT     | miRNA | miR-34a  |
| t0077101 | 22 | 1 TTCTGAATCCGTGCTGAGATCT     | miRNA | miR-3499 |
| t0082002 | 22 | 1 TCTGTATCCGTGCTGAGATTCT     | miRNA | miR-3499 |
| t0084880 | 24 | 1 CAGCATCCGTGCTGAGATTTTCGTC  | miRNA | miR-3499 |
| t0087414 | 22 | 1 TTCTGAATCCGTGCTGAGATAT     | miRNA | miR-3499 |
| t0087970 | 23 | 1 TTAGACGGTTTCAAACATGGTTA    | miRNA | miR-3498 |
| t0048329 | 21 | 1 CGCCCGGCGTCTGGACGTTTT      | miRNA | miR-3496 |
| t0088800 | 23 | 1 CGGCGTCTGGACGTTTGGTTTTT    | miRNA | miR-3496 |
| t0052582 | 20 | 1 CGCCCGGCGTCTGGACGTTT       | miRNA | miR-3496 |
| t0063963 | 19 | 1 TGCTCAAATCGTTGGCAA         | miRNA | miR-3495 |
| t0071987 | 21 | 1 TCAGAATAGTTTGCATGGCT       | miRNA | miR-3495 |
| t0043464 | 23 | 1 CCAGAATCGTTTGCATTGGCTAT    | miRNA | miR-3495 |
| t0061910 | 23 | 1 CAGAATCGTTTGCATGGCGTTT     | miRNA | miR-3495 |
| t0082391 | 22 | 1 TCAGAATCGTTTGCATGGCTT      | miRNA | miR-3495 |
| t0047179 | 21 | 1 AGAATCGTTCGCAATGGCGCT      | miRNA | miR-3495 |
| t0065013 | 20 | 1 GGCTCAAATCGTTGGCAAT        | miRNA | miR-3495 |
| t0089078 | 23 | 1 TCAGAATCGTTCGCAATGGCTAT    | miRNA | miR-3495 |
| t0092030 | 22 | 1 TCAGAATCGTTCGCAATGGCTT     | miRNA | miR-3495 |
| t0083503 | 20 | 1 CAGCTCAAATCGTTGGCAA        | miRNA | miR-3495 |
| t0045239 | 25 | 1 GAATCGTTTGCATGGCGCATTTTT   | miRNA | miR-3495 |
| t0047075 | 21 | 1 TAGAAGATTGCCGCTCGTTCT      | miRNA | miR-3494 |
| t0082805 | 20 | 1 ATAGAAGACTGCCGCTCGTT       | miRNA | miR-3494 |
| t0045057 | 23 | 1 AGACTGTTGCTCGTTTTGGATTT    | miRNA | miR-3494 |
| t0050277 | 24 | 1 TCGATAGAAGACTGCCGCTCTTTT   | miRNA | miR-3494 |
| t0050964 | 23 | 1 ATAGAAGACTGCCGCTCGTTTTG    | miRNA | miR-3494 |
| t0051592 | 23 | 1 ATAGAAGACTGCCGCTCGTTTTT    | miRNA | miR-3494 |
| t0061962 | 22 | 1 TATAGAAGACTGCCGCTCGTTT     | miRNA | miR-3494 |
| t0064133 | 21 | 1 ATAGAAGACTGCCGCTCGTTA      | miRNA | miR-3494 |
| t0072416 | 25 | 1 AGATTGCCGCTCGTTCTGGATCTTT  | miRNA | miR-3494 |
| t0081380 | 22 | 1 ACAGAAGACTGCCGCTCATTTA     | miRNA | miR-3494 |
| t0086863 | 21 | 1 GATAGAAGACTGCCGCTCGTT      | miRNA | miR-3494 |
| t0092568 | 20 | 1 TATAGAAGACTGCCGCTCGT       | miRNA | miR-3494 |
| t0093082 | 20 | 1 GATAGAAGACTGCCGCTCGT       | miRNA | miR-3494 |
| t0041646 | 22 | 1 TCGATAGAAGACTGCCGCTCCT     | miRNA | miR-3494 |
| t0042976 | 24 | 1 TCCGTGCTGAGATTTTCGTCATTTT  | miRNA | miR-3492 |
| t0045151 | 23 | 1 TCCGTGCTGAGATTTTCGTCATTC   | miRNA | miR-3492 |
| t0061003 | 20 | 1 TTCGTAAGACTGAGATTTTCGTC    | miRNA | miR-3492 |

|          |    |                              |       |             |
|----------|----|------------------------------|-------|-------------|
| t0063930 | 23 | 1 TCCGTGCTGAGATTTTCGTCGTTT   | miRNA | miR-3492    |
| t0065878 | 23 | 1 TCCGTGCTGAGATTTTCGGCATT    | miRNA | miR-3492    |
| t0073777 | 22 | 1 TATGACTGAGCGATTACTGGTT     | miRNA | miR-3491    |
| t0076974 | 24 | 1 ATGACTGAGCGATTACTGGATTTT   | miRNA | miR-3491    |
| t0080261 | 23 | 1 TATGACTGAGCGATTACTGGATT    | miRNA | miR-3491    |
| t0081774 | 21 | 1 ACTGAGCGATTACTGGAGTTT      | miRNA | miR-3491    |
| t0082441 | 23 | 1 TATGACTGAGCGATTACTGGTTT    | miRNA | miR-3491    |
| t0082848 | 22 | 1 TCTTTTTGGGTTGTGGGGTTAT     | miRNA | miR-3490    |
| t0083127 | 20 | 1 GTCTTTTCGGGTTGTGGGGT       | miRNA | miR-3490    |
| t0089895 | 23 | 1 TTTGGGTTGTGGGATAATAATTT    | miRNA | miR-3490    |
| t0046780 | 20 | 1 CGTCTTTTCGGGTTGTGGGG       | miRNA | miR-3490    |
| t0058410 | 24 | 1 CCGTAGCTCAGTTGGTCATCATAA   | miRNA | miR-3488    |
| t0074123 | 20 | 1 GCTCGGTAGCTCAGTTGGGA       | miRNA | miR-3488    |
| t0077161 | 21 | 1 CGTCCTCGAACTGTTGTGGCT      | miRNA | miR-3487    |
| t0082712 | 21 | 1 CGCCCTCGAACTGTTGTGGCT      | miRNA | miR-3487    |
| t0047103 | 22 | 1 TCCTCGAACTGATGTGGCCATT     | miRNA | miR-3487    |
| t0065018 | 23 | 1 ACCTCGAACGGTTGTGGCCATTT    | miRNA | miR-3487    |
| t0067618 | 23 | 1 TCCTCGAACTGTTGTGGCCATAT    | miRNA | miR-3487    |
| t0071859 | 23 | 1 CCTCGAACTGTTGTGGCCATTCA    | miRNA | miR-3487    |
| t0082973 | 20 | 1 CTCGAACTGTTGTGGCCATG       | miRNA | miR-3487    |
| t0055827 | 20 | 1 CCCTCGAACTGTTATGGCCA       | miRNA | miR-3487    |
| t0076276 | 23 | 1 CCCTCGAACTGTTGTGGCCATCT    | miRNA | miR-3487    |
| t0089375 | 23 | 1 TCGAACTGTTGTGGCCATGGTCT    | miRNA | miR-3487    |
| t0092697 | 24 | 1 TCCTCGAACTGTTGTGGCCAATTT   | miRNA | miR-3487    |
| t0065015 | 22 | 1 CGTCCTCGAACTGTTGTGGCTA     | miRNA | miR-3487    |
| t0073011 | 25 | 1 CCCTCGAACTGTTGTGGCCATTTTT  | miRNA | miR-3487    |
| t0042123 | 25 | 1 TCCTCGAACTGTTGTGGCCATTTTT  | miRNA | miR-3487    |
| t0043315 | 22 | 1 ACCTCGAACTGTTGTGGCCATT     | miRNA | miR-3487    |
| t0043417 | 21 | 1 CCTCGAACTGTTGTGGCCACT      | miRNA | miR-3487    |
| t0044151 | 20 | 1 TCCTCGAACGGTTGTGGCCA       | miRNA | miR-3487    |
| t0044503 | 22 | 1 TCCTCGAACTGTTGTGGCCAAT     | miRNA | miR-3487    |
| t0044530 | 24 | 1 CACGAACTGTTGTGGCCATATTCT   | miRNA | miR-3487    |
| t0045124 | 21 | 1 CTTCGAACTGTTGTGGCCATT      | miRNA | miR-3487    |
| t0046079 | 24 | 1 CCTCGAAATGTTGTGGCCATTTTT   | miRNA | miR-3487    |
| t0046479 | 23 | 1 CTCGAACTGTTGTGGCCATGTTT    | miRNA | miR-3487    |
| t0047409 | 21 | 1 AGCCCTCGAACTGTTGTGGCA      | miRNA | miR-3487    |
| t0048168 | 26 | 1 CCCTCGAACTGTTGTGGCCATTTTTT | miRNA | miR-3487    |
| t0049492 | 22 | 1 CCTCGAACTGTTGTGGCCATTT     | miRNA | miR-3487    |
| t0049651 | 21 | 1 TCCTCGAACTGTTGTGGCCTT      | miRNA | miR-3487    |
| t0051240 | 24 | 1 CTCGAACTGTTGTGGCCATTTTTT   | miRNA | miR-3487    |
| t0051392 | 23 | 1 CCCTCGAACTGTTGGGGCCATTT    | miRNA | miR-3487    |
| t0054262 | 23 | 1 TCCTCGAACTGTTGTGGCCATCT    | miRNA | miR-3487    |
| t0054767 | 21 | 1 CGTCCTCGAACTGTTGTGGCA      | miRNA | miR-3487    |
| t0056430 | 22 | 1 CGCCCTCGAACTGTTGTGGCTT     | miRNA | miR-3487    |
| t0058572 | 25 | 1 CCTCGAACTGTTATGGCCATTTTTT  | miRNA | miR-3487    |
| t0059701 | 24 | 1 CCCTCGAACTGTTGTGGCCATTTT   | miRNA | miR-3487    |
| t0061392 | 23 | 1 CGTCCTCGAACTGTTGTGGCTAT    | miRNA | miR-3487    |
| t0061589 | 24 | 1 CCACGAACTGTTGTGGCCACTTTA   | miRNA | miR-3487    |
| t0062685 | 22 | 1 TCTCGAACTGTTGTGGCCATTT     | miRNA | miR-3487    |
| t0065176 | 20 | 1 TCCTCGAACTGTTGGGGCCA       | miRNA | miR-3487    |
| t0065919 | 19 | 1 CTCGAACTGTTGTGGCCAT        | miRNA | miR-3487    |
| t0069198 | 19 | 1 CACGAACTGTTGTGGCCAC        | miRNA | miR-3487    |
| t0073067 | 22 | 1 CGTCCTCGAACTGTTGTGGCCT     | miRNA | miR-3487    |
| t0074363 | 21 | 1 CCCTCGAACTGTTGTGGCCAA      | miRNA | miR-3487    |
| t0077485 | 21 | 1 ATGACAAAAGGACGCGTTTAT      | miRNA | miR-3485-3p |
| t0078168 | 20 | 1 TTTAATGACGAAAGGACGCG       | miRNA | miR-3485-3p |
| t0078254 | 23 | 1 TTAATGACAAAAGGACGCGTTTT    | miRNA | miR-3485-3p |
| t0080622 | 22 | 1 TTTAATGACGAAAGGACGCGCA     | miRNA | miR-3485-3p |

|          |    |                             |       |             |
|----------|----|-----------------------------|-------|-------------|
| t0080993 | 22 | 1 ATGCCTGACAACCGTCTACCTT    | miRNA | miR-3483-3p |
| t0081053 | 23 | 1 CGGTGATCTTTGTATGGACATTT   | miRNA | miR-3481-3p |
| t0081349 | 22 | 1 TATTGCACTTACCTTCGCCTTG    | miRNA | miR-3479-3p |
| t0081988 | 23 | 1 TCTCACACGGAAATCGCACCCGT   | miRNA | miR-342-3p  |
| t0085441 | 23 | 1 TCTCACACAGAAATCGGACCCGT   | miRNA | miR-342-3p  |
| t0086941 | 25 | 1 TCTCACACAGAAATCGGACCCGTCA | miRNA | miR-342-3p  |
| t0086957 | 23 | 1 TCTCACACAGAAACCGCACCCGT   | miRNA | miR-342-3p  |
| t0091435 | 23 | 1 TCTCACAGAGAAATCGCACCCGT   | miRNA | miR-342-3p  |
| t0091573 | 22 | 1 TCTCACACAGAAATCGAAACCG    | miRNA | miR-342-3p  |
| t0044761 | 25 | 1 TCTCACACAGAAATCGCACACGTCA | miRNA | miR-342-3p  |
| t0049703 | 22 | 1 TCACACAGAAATCGCAACCGTC    | miRNA | miR-342-3p  |
| t0054383 | 22 | 1 TTTCACACAGAAATCGCACCCG    | miRNA | miR-342-3p  |
| t0072049 | 24 | 1 TCTCACACAGAAATCGCACACGTC  | miRNA | miR-342-3p  |
| t0065494 | 23 | 1 TCTCAAACAGAAATCGCACCCGT   | miRNA | miR-342-3p  |
| t0049584 | 24 | 1 CCTCACACAGAAATCGCACCCGTC  | miRNA | miR-342-3p  |
| t0077862 | 22 | 1 TCTCACACAGAAATCGTACCCG    | miRNA | miR-342-3p  |
| t0042608 | 22 | 1 TCTCACACAGAAATCCCATCCG    | miRNA | miR-342-3p  |
| t0042850 | 25 | 1 TCTCACACAGAAATCGCACCCGCCA | miRNA | miR-342-3p  |
| t0043069 | 24 | 1 TCTCGCACAGAAATCGCACCCGTA  | miRNA | miR-342-3p  |
| t0043607 | 22 | 1 TCTTACACAGAAATCGCATCCG    | miRNA | miR-342-3p  |
| t0044913 | 24 | 1 TCACACACAGAAATCGCACCCGTC  | miRNA | miR-342-3p  |
| t0046013 | 24 | 1 TCTCACACAGAAAACGCACCCGTC  | miRNA | miR-342-3p  |
| t0047080 | 25 | 1 TCTCTCACAGAAATCGCACCCGTCA | miRNA | miR-342-3p  |
| t0047163 | 22 | 1 TCTCACACAGAAATCGCGCCCG    | miRNA | miR-342-3p  |
| t0047408 | 25 | 1 TCTCATAGAAATCGCACCCGTCT   | miRNA | miR-342-3p  |
| t0048331 | 23 | 1 TCTCACACAGAAATCGCGCCCGT   | miRNA | miR-342-3p  |
| t0051102 | 23 | 1 TCTCATACAGAAATCGCACCCGT   | miRNA | miR-342-3p  |
| t0051756 | 22 | 1 TCTCACACAGAAATCGCACCCA    | miRNA | miR-342-3p  |
| t0052313 | 22 | 1 GCTCACACAGAAATCGCACCCG    | miRNA | miR-342-3p  |
| t0052627 | 24 | 1 TCCCACACAGAAATCGCACCCGTC  | miRNA | miR-342-3p  |
| t0054461 | 25 | 1 TCTCACTCAGAAATCGCACCCGTCT | miRNA | miR-342-3p  |
| t0054801 | 21 | 1 TCTCACACAGCAATCGCACCC     | miRNA | miR-342-3p  |
| t0056021 | 24 | 1 TCTCACACAGAAATCGCACCCAGTC | miRNA | miR-342-3p  |
| t0056775 | 23 | 1 TCAAACAGAAATCGCACCCGTCA   | miRNA | miR-342-3p  |
| t0057560 | 25 | 1 TCTCACACAGAGATCGCACCCGTCA | miRNA | miR-342-3p  |
| t0057663 | 23 | 1 TCTCACAAAGAAATCGCACCCGA   | miRNA | miR-342-3p  |
| t0057729 | 18 | 1 TCTCATACAGAAATCGCG        | miRNA | miR-342-3p  |
| t0058707 | 24 | 1 TCTCAAACAGAAATCGCACCCGTC  | miRNA | miR-342-3p  |
| t0059580 | 22 | 1 ACTCACACAGAAATCGCACCCG    | miRNA | miR-342-3p  |
| t0060125 | 23 | 1 TGTCACACAGAAATCGCACCCGT   | miRNA | miR-342-3p  |
| t0060302 | 22 | 1 TCTCACTCAGAAATCGCACCCG    | miRNA | miR-342-3p  |
| t0060326 | 24 | 1 TCTCACCCAGAAATCGCACCCGTC  | miRNA | miR-342-3p  |
| t0063138 | 25 | 1 TCTCACACAGAAATCGCACACGTCT | miRNA | miR-342-3p  |
| t0063854 | 23 | 1 TTTCACACAGAAATCGCACCCGT   | miRNA | miR-342-3p  |
| t0063863 | 25 | 1 TCTCACACAGAAATCGCAACCGTCT | miRNA | miR-342-3p  |
| t0063880 | 22 | 1 TCTCACACAGAAATCGCCTCCG    | miRNA | miR-342-3p  |
| t0063962 | 22 | 1 TCTCACACAGAAATCGGACCCG    | miRNA | miR-342-3p  |
| t0063979 | 23 | 1 TCTCACACAGAAATCGCACCCAGT  | miRNA | miR-342-3p  |
| t0064933 | 24 | 1 TCTCACAAAGAAATCGCACCCGTT  | miRNA | miR-342-3p  |
| t0066669 | 23 | 1 TCACACAGAAATCGCAACCGTCA   | miRNA | miR-342-3p  |
| t0066972 | 22 | 1 TCACACAGAAATCGCACCCAGTC   | miRNA | miR-342-3p  |
| t0067614 | 22 | 1 TCTCACACAGACATCGCAACCG    | miRNA | miR-342-3p  |
| t0067830 | 22 | 1 TCTCACACAGAAATCGCACTCG    | miRNA | miR-342-3p  |
| t0068033 | 23 | 1 TCTCACTGAAATCGCACCCGT     | miRNA | miR-342-3p  |
| t0068151 | 23 | 1 TATCACACAGAAATCGCACCCGT   | miRNA | miR-342-3p  |
| t0068309 | 24 | 1 TCACACAGAAATCGAACCCGTCAT  | miRNA | miR-342-3p  |
| t0068559 | 25 | 1 TCCCACACAGAAATCGCACCCGTCA | miRNA | miR-342-3p  |
| t0069061 | 25 | 1 TCTCACACAGAAATCGCACCTGTCT | miRNA | miR-342-3p  |



|          |    |                              |       |            |
|----------|----|------------------------------|-------|------------|
| t0069189 | 25 | 1 TCTCACACAGAAATCGTACCCGTCT  | miRNA | miR-342-3p |
| t0069880 | 23 | 1 TCACACAGAAATAGCACCCGTAA    | miRNA | miR-342-3p |
| t0070011 | 22 | 1 TCACACACAGAAATCGCACCCG     | miRNA | miR-342-3p |
| t0071004 | 24 | 1 TCTCACACAGAGATCGCACCCGTC   | miRNA | miR-342-3p |
| t0071115 | 22 | 1 TCTTACACAGAAATCGCACCCG     | miRNA | miR-342-3p |
| t0072432 | 22 | 1 TCTAACACAGAAATCGCACCCG     | miRNA | miR-342-3p |
| t0072671 | 23 | 1 TCTCACGCAGAAATCGCACCCGA    | miRNA | miR-342-3p |
| t0072840 | 23 | 1 TCTCACACAGAAATCGCAACCGT    | miRNA | miR-342-3p |
| t0073128 | 24 | 1 TCTCACACAGATATCGCACCCGTC   | miRNA | miR-342-3p |
| t0073164 | 22 | 1 TCACACAGAAATCGCACTCGTC     | miRNA | miR-342-3p |
| t0074562 | 22 | 1 TCTCACACAGAAATGGCACCCG     | miRNA | miR-342-3p |
| t0074899 | 25 | 1 TCTCACACAGAAATCGCATCCATCA  | miRNA | miR-342-3p |
| t0075235 | 23 | 1 TCTCACACAGAAATCTCACCCGT    | miRNA | miR-342-3p |
| t0075750 | 23 | 1 TCACACAGAAATCGCACCCGACA    | miRNA | miR-342-3p |
| t0076747 | 24 | 1 TCTCACACAGAAATCGAACCCGTT   | miRNA | miR-342-3p |
| t0077218 | 23 | 1 TCTCACACAGAAATCGAACCCGA    | miRNA | miR-342-3p |
| t0077248 | 25 | 1 TCTCACACAGAAATCGCACCCATCT  | miRNA | miR-342-3p |
| t0078277 | 25 | 1 TCTCACACAGAAATCGCACCCAGTCT | miRNA | miR-342-3p |
| t0079572 | 23 | 1 TCTCACACAGAAATCGTACCCGT    | miRNA | miR-342-3p |
| t0080038 | 23 | 1 TCTCACACAGAAATCGCAGCCGT    | miRNA | miR-342-3p |
| t0080133 | 23 | 1 TCTCTCACAGAAATCGCACCCGT    | miRNA | miR-342-3p |
| t0080676 | 24 | 1 TCTCACATAGAAATCGCACCCGTC   | miRNA | miR-342-3p |
| t0081189 | 25 | 1 TCTCACACAGAAATCGCACCCGACA  | miRNA | miR-342-3p |
| t0081282 | 23 | 1 TCACACAGAAATAGCACCCGTCA    | miRNA | miR-342-3p |
| t0081722 | 22 | 1 TCTCACACAGCAATCGCACCCG     | miRNA | miR-342-3p |
| t0082122 | 22 | 1 TCTCACAGAGAAATCGCACCCG     | miRNA | miR-342-3p |
| t0082541 | 22 | 1 TCTCACACGGAAATCGCACCCG     | miRNA | miR-342-3p |
| t0082649 | 22 | 1 TCTCACACAGAAAACGCACCCG     | miRNA | miR-342-3p |
| t0082967 | 23 | 1 TCTCACACAGAAATCGAAACCGT    | miRNA | miR-342-3p |
| t0083081 | 23 | 1 TCACACAGGAATCGCACCCGTCA    | miRNA | miR-342-3p |
| t0084145 | 22 | 1 TCTCACACAGAAAGCGCACCCG     | miRNA | miR-342-3p |
| t0084367 | 23 | 1 ACTCACACAGAAATCGTACCCGT    | miRNA | miR-342-3p |
| t0084876 | 25 | 1 TCTCACACAGAAATCACACCCGTCT  | miRNA | miR-342-3p |
| t0085203 | 24 | 1 TCTCACAAAGAAATCGCACCCGTC   | miRNA | miR-342-3p |
| t0085672 | 24 | 1 TCTCACACAGGAATCGCACCCGTC   | miRNA | miR-342-3p |
| t0086166 | 25 | 1 TCTCACCCAGAAATCGCACCCGTCA  | miRNA | miR-342-3p |
| t0086288 | 23 | 1 TCTCACACAGAAAACGCACCCGT    | miRNA | miR-342-3p |
| t0086434 | 22 | 1 TTATAAAGCAATGAGACTGACT     | miRNA | miR-340-5p |
| t0088223 | 22 | 1 TTATGAAGCAATGAGACTGATT     | miRNA | miR-340-5p |
| t0089539 | 21 | 1 TTATAAAGCAGTGAGACTGAT      | miRNA | miR-340-5p |
| t0089583 | 21 | 1 TTATAAAGCAATGAGACTGAC      | miRNA | miR-340-5p |
| t0090341 | 21 | 1 TTATAAAGCAATGAGACTGGT      | miRNA | miR-340-5p |
| t0091169 | 19 | 1 TTATAAAGCAGTGAGACTG        | miRNA | miR-340-5p |
| t0091478 | 20 | 1 TTATAAAGCAATGAGAGTGA       | miRNA | miR-340-5p |
| t0092022 | 22 | 1 TTAAAAAGCAATGAGACTGATT     | miRNA | miR-340-5p |
| t0092043 | 22 | 1 TTATAAAGCAATGGGACTGATT     | miRNA | miR-340-5p |
| t0092102 | 20 | 1 TTACAAAGCAATGAGACTGA       | miRNA | miR-340-5p |
| t0092237 | 20 | 1 ATAAAGCAATGAGACTGCTT       | miRNA | miR-340-5p |
| t0092694 | 20 | 1 TTATAAAGCAATGAGCCTGA       | miRNA | miR-340-5p |
| t0093419 | 21 | 1 TTATAAAGCAATGACACTGAT      | miRNA | miR-340-5p |
| t0041711 | 21 | 1 TTATAAAGCGATGAGACTGAT      | miRNA | miR-340-5p |
| t0044444 | 22 | 1 TTATAAAGCAATGAGACTAATT     | miRNA | miR-340-5p |
| t0044862 | 20 | 1 ATAAAGCAATGAGATTGATT       | miRNA | miR-340-5p |
| t0046622 | 22 | 1 TTATAAAGCAATGAGACCGATT     | miRNA | miR-340-5p |
| t0048778 | 21 | 1 TTATAAAGCAATAAGACTGAT      | miRNA | miR-340-5p |
| t0049403 | 22 | 1 TTATAAAGCAATGAGAATGATT     | miRNA | miR-340-5p |
| t0049411 | 20 | 1 TTATAAAGCGATGAGACTGA       | miRNA | miR-340-5p |
| t0049515 | 21 | 1 TTATAAAGCAATGGGACTGAT      | miRNA | miR-340-5p |

|          |    |                             |       |            |
|----------|----|-----------------------------|-------|------------|
| t0051604 | 22 | 1 GATTATAAAGCAATGAGATTGA    | miRNA | miR-340-5p |
| t0051716 | 22 | 1 TTACAAAGCAATGAGACTGATT    | miRNA | miR-340-5p |
| t0051810 | 19 | 1 CTATAAAGCAATGAGACTG       | miRNA | miR-340-5p |
| t0054606 | 20 | 1 TCATAAAGCAATGAGACTGA      | miRNA | miR-340-5p |
| t0059199 | 20 | 1 TTATAAAGCAATGAGATTGA      | miRNA | miR-340-5p |
| t0062330 | 22 | 1 TTATAAAGCAATGAGATTGATA    | miRNA | miR-340-5p |
| t0062478 | 21 | 1 TTATAAAGCAATGAGACTGCT     | miRNA | miR-340-5p |
| t0065453 | 21 | 1 TTACAAAGCAATGAGACTGAT     | miRNA | miR-340-5p |
| t0066703 | 22 | 1 TTATAAAGCAATGAGACGGATT    | miRNA | miR-340-5p |
| t0071508 | 21 | 1 TCATAAAGCAATGAGACTGAT     | miRNA | miR-340-5p |
| t0072757 | 22 | 1 TTGTAAAGCAATGAGACTGATT    | miRNA | miR-340-5p |
| t0072793 | 19 | 1 TCCCTGTCCTCAAGGAGCT       | miRNA | miR-339b   |
| t0074101 | 19 | 1 TCCCTGTTCTCCAGGAGCT       | miRNA | miR-339b   |
| t0074609 | 21 | 1 TGAGCGCCTCGACGACAGAGC     | miRNA | miR-339-3p |
| t0077061 | 20 | 1 TGAGCGCCTCGACGACAGAG      | miRNA | miR-339-3p |
| t0079765 | 21 | 1 TGAGAGCCTAGACGACAGAGA     | miRNA | miR-339    |
| t0082057 | 20 | 1 TGAGAGCCTCGACGACAGAG      | miRNA | miR-339    |
| t0083029 | 21 | 1 GCCCCTGGGCCTATCCTAGCA     | miRNA | miR-331    |
| t0085381 | 22 | 1 GCCCCTGGGCCTATCCTAGAAT    | miRNA | miR-331    |
| t0086060 | 22 | 1 GCCCCTGGGACTATCCTAGAAA    | miRNA | miR-331    |
| t0086120 | 21 | 1 GCCCCTGGGCCTATCCTAGAC     | miRNA | miR-331    |
| t0087572 | 23 | 1 GCAAATCACACGGCCTGCAGAGA   | miRNA | miR-330-3p |
| t0090197 | 23 | 1 GCAAAGCACACGGCCTGCAGCGT   | miRNA | miR-330-3p |
| t0090301 | 23 | 1 GCCAAGCACACGGCCTGCAGAGA   | miRNA | miR-330-3p |
| t0065650 | 22 | 1 GCAAAGCACACGGCCTGCAGCG    | miRNA | miR-330-3p |
| t0079508 | 23 | 1 GCAAAGCACACGGCCTGCAAAGA   | miRNA | miR-330-3p |
| t0077431 | 23 | 1 GCAAAGCACCCGGCCTGCAGAGA   | miRNA | miR-330-3p |
| t0089961 | 19 | 1 TCTCTGGGACTGTGTCTTA       | miRNA | miR-330    |
| t0044991 | 20 | 1 GCATCCCCTAGGGCATTGGT      | miRNA | miR-324-5p |
| t0048401 | 22 | 1 CGCATCCCCTAGGGCATTGGGG    | miRNA | miR-324-5p |
| t0050188 | 21 | 1 CGCATCCCCTAGGGCTTTGGT     | miRNA | miR-324-5p |
| t0050635 | 22 | 1 CGCATCCCCTAGAGCATTGGTG    | miRNA | miR-324-5p |
| t0066844 | 21 | 1 ACTGCCCCAGGTGCCGCTGGT     | miRNA | miR-324-3p |
| t0085896 | 24 | 1 AAACATGAAGCGCTGCAACACATC  | miRNA | miR-322*   |
| t0054803 | 20 | 1 AAAGACTGAAGTGGAGAAGG      | miRNA | miR-320e   |
| t0062393 | 24 | 1 TAAAGACTGAAGTGGAGAAGGGTT  | miRNA | miR-320e   |
| t0063383 | 23 | 1 TAAAGACTGAAGTGGAGAAGGGT   | miRNA | miR-320e   |
| t0069977 | 25 | 1 TAAAGACTGAAGTGGAGAAGGGTTT | miRNA | miR-320e   |
| t0077832 | 23 | 1 AAAAGCTGGGTTGAGCGGGAGAA   | miRNA | miR-320d   |
| t0080607 | 23 | 1 ATAAGCTGGGTTGAGAGGGCGTT   | miRNA | miR-320d   |
| t0083730 | 22 | 1 AAAGCTGGGTTGAGAGGGCGCT    | miRNA | miR-320d   |
| t0050513 | 23 | 1 AAACGCTGGGTTGAGAGGGGGAT   | miRNA | miR-320d   |
| t0080953 | 23 | 1 GAAAGCTGGGTTGAGAGGGCGGT   | miRNA | miR-320d   |
| t0083054 | 22 | 1 AAAAGCTGGGTTAAGAGGGCAT    | miRNA | miR-320d   |
| t0085103 | 24 | 1 AAAAGCTGGGTTGAGAGGGGGGAT  | miRNA | miR-320d   |
| t0057679 | 23 | 1 AAAAGCTGGGTTGAGAAGGCGTA   | miRNA | miR-320d   |
| t0088030 | 23 | 1 AAAAGCTGGGTTGAGAGGGCGGC   | miRNA | miR-320d   |
| t0052400 | 22 | 1 AAAAGCTGGGTTGAGAGGGCGAG   | miRNA | miR-320d   |
| t0054617 | 24 | 1 ATAAGCTGGGTTGAGAGGGCGTTG  | miRNA | miR-320d   |
| t0070344 | 23 | 1 GAAAAGCTGGGTTGAGAGGGGGT   | miRNA | miR-320d   |
| t0077930 | 23 | 1 AAAAGCTGGGTTTAGAGGGCGTA   | miRNA | miR-320d   |
| t0041338 | 23 | 1 AAAAGCTGCTTTGAGAGGGCGGT   | miRNA | miR-320d   |
| t0041521 | 22 | 1 AAAGCTGGGTTGGGAGGGCGTA    | miRNA | miR-320d   |
| t0041899 | 24 | 1 AAAAGCTGGGTTGAGAGGACGAAA  | miRNA | miR-320d   |
| t0042519 | 25 | 1 AAAAGCTGGGTTGAGAGGGCGCTAT | miRNA | miR-320d   |
| t0042766 | 23 | 1 AAAAGCTGGGTTGAGAGGGCTTT   | miRNA | miR-320d   |
| t0042855 | 22 | 1 AACAGCTGGGTTGAGAGGGCGG    | miRNA | miR-320d   |
| t0043094 | 23 | 1 AAAAGCTGGGTCGAGAGGGCGGA   | miRNA | miR-320d   |

|          |    |                             |       |          |
|----------|----|-----------------------------|-------|----------|
| t0043998 | 24 | 1 AAAAGCTGGGTTGAGAGGGTAAAA  | miRNA | miR-320d |
| t0044331 | 23 | 1 AAAGGCTGGGTTGAGAGGGCGGT   | miRNA | miR-320d |
| t0044641 | 22 | 1 AAAAGCTGGGTTGAGAGGACAA    | miRNA | miR-320d |
| t0044770 | 21 | 1 AAAGCTGGGTTGAGAGGGTGA     | miRNA | miR-320d |
| t0045201 | 21 | 1 AAGCTGGGTTGAGAGGGCGTC     | miRNA | miR-320d |
| t0045262 | 22 | 1 AAAAGTTGGGTTGAGAGGGTGA    | miRNA | miR-320d |
| t0045302 | 22 | 1 AAAAGCTGGGTTGAGAGGAGTT    | miRNA | miR-320d |
| t0045533 | 23 | 1 AAAAGCTGGGTTGAGAGGGCACG   | miRNA | miR-320d |
| t0045572 | 22 | 1 AAAAGCTGGGTTGCGAGGGAGT    | miRNA | miR-320d |
| t0046045 | 21 | 1 AAAGCTGGGTTGAGGGGGCGT     | miRNA | miR-320d |
| t0046124 | 21 | 1 AAAGCTGGGATGAGAGGGCGT     | miRNA | miR-320d |
| t0046273 | 22 | 1 ACAAGCTGGGTTGAGAGGGGGA    | miRNA | miR-320d |
| t0046367 | 23 | 1 AAAAGCTGGGTTGAGAGGGCTTA   | miRNA | miR-320d |
| t0046473 | 22 | 1 AAAAGCTTGGTTGAGAGGGAGT    | miRNA | miR-320d |
| t0046532 | 24 | 1 AAAAGCTGGGTTGAGAGGGCGCGT  | miRNA | miR-320d |
| t0046715 | 23 | 1 AAAAGCTGGGTCGAGAGGGAGAA   | miRNA | miR-320d |
| t0046726 | 24 | 1 AAAAGCTGGGCTGAGAGGGCATAA  | miRNA | miR-320d |
| t0047335 | 23 | 1 AAAAGCTGGGTTGAGAGGGCTGA   | miRNA | miR-320d |
| t0047337 | 24 | 1 GAAAAGCTGGGGTGAGAGGGCGTA  | miRNA | miR-320d |
| t0047475 | 22 | 1 GAAAAGTTGGGTTGAGAGGACT    | miRNA | miR-320d |
| t0047583 | 22 | 1 AAAAGTTGGGTTGAGAGGCGAA    | miRNA | miR-320d |
| t0047665 | 22 | 1 AAAAGCGGGTTGAGAGGGCAT     | miRNA | miR-320d |
| t0047669 | 23 | 1 AAAAGCTGGGTTGAGAGGGGGAG   | miRNA | miR-320d |
| t0047720 | 22 | 1 AAAAGCTGGGGTGAGAGGGCAT    | miRNA | miR-320d |
| t0048123 | 22 | 1 AAAAGCTGGGTTGAGAGGGCGC    | miRNA | miR-320d |
| t0049023 | 22 | 1 AAAAGCTGGGTTAAGAGGGAGT    | miRNA | miR-320d |
| t0049156 | 23 | 1 AAAAGCTGGGTTGAGAGGTCGAT   | miRNA | miR-320d |
| t0049170 | 23 | 1 AAGAGCTGGGTTAAGAGGGCGTA   | miRNA | miR-320d |
| t0049421 | 24 | 1 AAAAGCTGGGTTGAGAGGGTGAAT  | miRNA | miR-320d |
| t0049767 | 23 | 1 GAAAAGCTGGGTTGAGAGGGCGC   | miRNA | miR-320d |
| t0049903 | 24 | 1 AAAAGCTCGGTTGAGAGGGCGTTT  | miRNA | miR-320d |
| t0049961 | 22 | 1 AAAAGCTGGGTTGAAAGGGCAT    | miRNA | miR-320d |
| t0050161 | 21 | 1 AAAAGCTGGGGTGAGAGGGTT     | miRNA | miR-320d |
| t0050339 | 23 | 1 GAAAGCTGGGTTGAGAGGGCGCA   | miRNA | miR-320d |
| t0050479 | 22 | 1 AGAAGCTGGGTTGAGAGGCGAA    | miRNA | miR-320d |
| t0051261 | 22 | 1 AAAGCTGGGGTGAGAGGGCGTA    | miRNA | miR-320d |
| t0051815 | 22 | 1 AAAAGATGGGTTGAGAGGGCAT    | miRNA | miR-320d |
| t0051937 | 23 | 1 AAAAGCTAGGTTGAGAGGGCGGA   | miRNA | miR-320d |
| t0052044 | 22 | 1 AAAAGTTGGGTTGAGTGGGCGT    | miRNA | miR-320d |
| t0052162 | 23 | 1 AAAAAGCTGGGTTGAGAGGGCTTA  | miRNA | miR-320d |
| t0052282 | 23 | 1 AAAAGCTGGGTTGAGAGGGCCGA   | miRNA | miR-320d |
| t0052379 | 24 | 1 GAAAAGCTGGGTTGAGAGGGAGTA  | miRNA | miR-320d |
| t0052583 | 22 | 1 AAAAAGCTGGGTTGAGAGGGCGC   | miRNA | miR-320d |
| t0053232 | 23 | 1 AAAAAGCTGGTTTGAGAGGGCGTA  | miRNA | miR-320d |
| t0053294 | 20 | 1 AAAGCTAGGTTGAGAGGGCC      | miRNA | miR-320d |
| t0053386 | 23 | 1 AAAAGCTGGGTTGCGAGGGCGTG   | miRNA | miR-320d |
| t0053441 | 21 | 1 AAAAGCTGGGTTGAGCGGGTA     | miRNA | miR-320d |
| t0053689 | 23 | 1 AAAAGCTGGGTTGAAAGGGAGAA   | miRNA | miR-320d |
| t0053851 | 25 | 1 AAAAGCTGGGTTGAGAGGGCGCAAG | miRNA | miR-320d |
| t0054551 | 23 | 1 AAAAGCTGCGTTGAGAGGGCGTA   | miRNA | miR-320d |
| t0054845 | 23 | 1 AAAAGCTGGGTTGAGAGGGAGAA   | miRNA | miR-320d |
| t0055196 | 23 | 1 AAAAGATGGGTTGAGAGGGGGAA   | miRNA | miR-320d |
| t0055265 | 24 | 1 AAAAGCTGGGTTGAGAGGGAGAGC  | miRNA | miR-320d |
| t0055505 | 24 | 1 AAACGCTGGGTTGAGAGGGCGTTT  | miRNA | miR-320d |
| t0055779 | 23 | 1 AAGAGCTGGGTTGAGAGGGCGTT   | miRNA | miR-320d |
| t0055826 | 24 | 1 AAAAGCTGGGTTGAGAGGGGGATC  | miRNA | miR-320d |
| t0055991 | 23 | 1 AAAAGCTGGCTTGAGAGGGCGTA   | miRNA | miR-320d |
| t0056059 | 22 | 1 AAAAGCTGGGTTGAGAGCGCGT    | miRNA | miR-320d |

|          |    |                             |       |          |
|----------|----|-----------------------------|-------|----------|
| t0056391 | 22 | 1 AAAAGCCGGGTTGAGAGGGCAT    | miRNA | miR-320d |
| t0056519 | 23 | 1 AAAAGCTGGGTTGAGAGGGCTCA   | miRNA | miR-320d |
| t0056791 | 24 | 1 AAAAGCTGGGTTGAGAGGGTGTA   | miRNA | miR-320d |
| t0057085 | 23 | 1 AAAAGCTGGGTTGAGAGGGAGTG   | miRNA | miR-320d |
| t0057532 | 22 | 1 AAAGCTGGGGTGAGAGGGCGTT    | miRNA | miR-320d |
| t0057911 | 21 | 1 AAAAGATGGGTTGAGAGGGCT     | miRNA | miR-320d |
| t0058148 | 23 | 1 AAAAGCTGGGTTGAGAGGGAGCT   | miRNA | miR-320d |
| t0058188 | 23 | 1 AAAGCTGGGGTGAGAGGGCGTTT   | miRNA | miR-320d |
| t0058463 | 22 | 1 AAAAGCTGGGTTGAGAGGGTGC    | miRNA | miR-320d |
| t0058508 | 21 | 1 GAAAAGCTGGGTTGAGAGGCA     | miRNA | miR-320d |
| t0058757 | 22 | 1 AAAAGGTGGGTTGAGAGGGCGT    | miRNA | miR-320d |
| t0058772 | 21 | 1 AAAGATGGGTTGAGAGGGCGT     | miRNA | miR-320d |
| t0059094 | 22 | 1 AAAGCTGGGTTGAGAGGGCATA    | miRNA | miR-320d |
| t0060139 | 22 | 1 AAAAGCTGGGTTAAGAGGGCGTT   | miRNA | miR-320d |
| t0060329 | 24 | 1 GAAAAGCTGGGTTGAGAGGGCGCA  | miRNA | miR-320d |
| t0060411 | 23 | 1 AAAAGCCGGGTTGAGAGGGCGCA   | miRNA | miR-320d |
| t0060458 | 25 | 1 TCTACAAGCTGGGTTGAGAGGGCGT | miRNA | miR-320d |
| t0060627 | 23 | 1 AGAAGCTGGGGTGAGAGGGCGTT   | miRNA | miR-320d |
| t0060671 | 22 | 1 AAAGCTGGGTTGAGAGGGCGGT    | miRNA | miR-320d |
| t0060914 | 24 | 1 CAAAAGCTGGGTTGGGAGGGCGTA  | miRNA | miR-320d |
| t0061005 | 22 | 1 AAAAGCTGGGTTGAGATGGAGA    | miRNA | miR-320d |
| t0061429 | 23 | 1 AAAAGATGGGTTGAGAGGGCATA   | miRNA | miR-320d |
| t0061438 | 23 | 1 AAAAGCTGGGTTGAGAGCGCGCA   | miRNA | miR-320d |
| t0061459 | 22 | 1 AAAAGCTGGGTAGAGAGGGCGT    | miRNA | miR-320d |
| t0061853 | 22 | 1 AAAAGCTGGGTTGCGAGGGCTA    | miRNA | miR-320d |
| t0062309 | 22 | 1 AAAAGCTGGGTTGAGAGGGCTC    | miRNA | miR-320d |
| t0062810 | 25 | 1 TCTAAAAGCTGGGTTGAGAGGGAGT | miRNA | miR-320d |
| t0063087 | 23 | 1 AAAAGCTGGTTTGAGAGGGCGCA   | miRNA | miR-320d |
| t0063485 | 22 | 1 AAAGCTGGGCTGAGAGGGGGAA    | miRNA | miR-320d |
| t0063568 | 22 | 1 AAGAGCTGGGTTGAGTGGGCGT    | miRNA | miR-320d |
| t0063726 | 22 | 1 AAAAGCTGGGTTGCGAGGGCGG    | miRNA | miR-320d |
| t0063772 | 22 | 1 AAAGCTGGGTTGAGAGGGAGAT    | miRNA | miR-320d |
| t0063816 | 22 | 1 AAAAGCTCGGTTGAGAGGGCGC    | miRNA | miR-320d |
| t0063837 | 22 | 1 AAAAGCTGGGTTGGGAGGGCGTT   | miRNA | miR-320d |
| t0063881 | 24 | 1 AAAAGCTGGGTTGTGAGGGCGTAT  | miRNA | miR-320d |
| t0064454 | 23 | 1 AAAAGCTGGGTTGAGAGAGAGAT   | miRNA | miR-320d |
| t0064514 | 22 | 1 AAAAGCTAGGTTGAGAGGGCGG    | miRNA | miR-320d |
| t0064623 | 23 | 1 AAAAGCTGGGTTGAGAGTGCGTT   | miRNA | miR-320d |
| t0065102 | 23 | 1 AAAAGCTGCGTTGAGAGGGCGCT   | miRNA | miR-320d |
| t0065636 | 23 | 1 AAAAGCTGGGTTGAGAGGGAAAT   | miRNA | miR-320d |
| t0065667 | 22 | 1 AATAGCTGGGTTGAGAGGGCGT    | miRNA | miR-320d |
| t0065907 | 22 | 1 AAAAGCTGGGTTGTGAGGGGGA    | miRNA | miR-320d |
| t0066261 | 23 | 1 AAAAGCTGGGTTGAGAGGCGAAT   | miRNA | miR-320d |
| t0066715 | 23 | 1 AAAAGCTAGGTTGAGAGGGCGCC   | miRNA | miR-320d |
| t0066984 | 22 | 1 AAAAGCTGGGTTGAGCGGGCGC    | miRNA | miR-320d |
| t0067001 | 23 | 1 AAAAGCTGGGTTGAAAGGGCGTG   | miRNA | miR-320d |
| t0067732 | 24 | 1 AAAAGCTGGGTTGAGAGGGAGGAT  | miRNA | miR-320d |
| t0067889 | 23 | 1 AAAAGCTGGGTTGAGAGGCCGTA   | miRNA | miR-320d |
| t0067891 | 22 | 1 AAAAGCTGGGTTGAGGGGGCGG    | miRNA | miR-320d |
| t0067944 | 23 | 1 AAAAGCTGGGTTGAGAGGTCGTT   | miRNA | miR-320d |
| t0067988 | 22 | 1 AAAAGCTGGGTTGAGTGGGCGG    | miRNA | miR-320d |
| t0067998 | 23 | 1 GAAAAGCTGGGTTGAGAGGGAGA   | miRNA | miR-320d |
| t0068243 | 23 | 1 AACAGCTGGGTTGAGAGGGCGGT   | miRNA | miR-320d |
| t0068321 | 25 | 1 AAAAGCTGGGTTGAGAGGGAGTTAA | miRNA | miR-320d |
| t0068453 | 22 | 1 AACAGCTGGGTTGAGCGGGCGT    | miRNA | miR-320d |
| t0068691 | 24 | 1 AAAAGCTGGGTTGAGAGGGGGAAT  | miRNA | miR-320d |
| t0068822 | 22 | 1 AAAAGCTGGGGTGGGAGGGCGT    | miRNA | miR-320d |
| t0068976 | 23 | 1 AAAAGATGGGTTGAGAGGGAGAT   | miRNA | miR-320d |

|          |    |                             |       |          |
|----------|----|-----------------------------|-------|----------|
| t0069295 | 23 | 1 AAACGCTGGGTTGAGAGGGAGAA   | miRNA | miR-320d |
| t0069454 | 22 | 1 AAAGCTGGGTTGAGAGGGCGTC    | miRNA | miR-320d |
| t0069576 | 23 | 1 AAAACTGGGTTGAGAGGGCGTTA   | miRNA | miR-320d |
| t0069610 | 22 | 1 AAAAGCTGGGTTGAGAGGGATA    | miRNA | miR-320d |
| t0069722 | 21 | 1 AAAAGCTGGGTCGAGAGGGAA     | miRNA | miR-320d |
| t0070064 | 23 | 1 GAAAGCTGGGTTGAAAGGGCGTA   | miRNA | miR-320d |
| t0070130 | 24 | 1 GAAAGCTGGGTTGAGAGGGCGTTA  | miRNA | miR-320d |
| t0070221 | 21 | 1 AAAAGCTGGGTTGAGGGGCGC     | miRNA | miR-320d |
| t0070245 | 22 | 1 GAAAAGCTGGGTTGAGAGGGGG    | miRNA | miR-320d |
| t0070271 | 23 | 1 AAAAGCTGACTTGAGAGGGCGTA   | miRNA | miR-320d |
| t0070295 | 24 | 1 AAAAGCTGGGTTGAGAGGGGGATT  | miRNA | miR-320d |
| t0071502 | 24 | 1 AAAAGCTGGGGTGAGAGGGGGAAT  | miRNA | miR-320d |
| t0071811 | 23 | 1 AAAAGCTGGGTAGAGAGGGCGTA   | miRNA | miR-320d |
| t0072224 | 22 | 1 AAAAGCTGGATTGAGAGGGAGA    | miRNA | miR-320d |
| t0072283 | 23 | 1 AAAAGCTGGGTTGAGAGGGTGA    | miRNA | miR-320d |
| t0072607 | 22 | 1 AAAAGCTTGGTTGAGAGGGAGA    | miRNA | miR-320d |
| t0072781 | 22 | 1 AAAAGCGGGGTTGAGAGGGCGT    | miRNA | miR-320d |
| t0073704 | 23 | 1 AAAAGCTGGTTTGAGAGGGCATA   | miRNA | miR-320d |
| t0073964 | 23 | 1 AAAAGCTGGGGTGAGAGGGGGTT   | miRNA | miR-320d |
| t0074557 | 24 | 1 AAAAGCTGGGTTGAGAGGGTGTA   | miRNA | miR-320d |
| t0074998 | 23 | 1 AAAAGATGGGTTGAGAGGGAGTA   | miRNA | miR-320d |
| t0076382 | 22 | 1 AAAAGCTGGGTTGAGATGGGGA    | miRNA | miR-320d |
| t0076676 | 24 | 1 AAAAGCTAGGTTGAGAGGGCGTT   | miRNA | miR-320d |
| t0076807 | 23 | 1 AAAAGCTGGCTTGAGAGGGCGGT   | miRNA | miR-320d |
| t0076821 | 22 | 1 AAAGCTGGGTTGAGAGGGCGTT    | miRNA | miR-320d |
| t0076892 | 23 | 1 AAAGCTGGGTTGAGAGGGCGCAT   | miRNA | miR-320d |
| t0077421 | 21 | 1 AAAAGCTGGGTTGAGAAGGAG     | miRNA | miR-320d |
| t0077743 | 21 | 1 AAAAGCTGGGTTGAGGGCGTA     | miRNA | miR-320d |
| t0077788 | 22 | 1 AAAAGCTGGGATGAGAGGGAGT    | miRNA | miR-320d |
| t0078677 | 24 | 1 AAAGCTGGGTTGAGAGGGAGAAAT  | miRNA | miR-320d |
| t0078992 | 23 | 1 AAAAGCTGGGTTGAGTGGGCGTA   | miRNA | miR-320d |
| t0079004 | 24 | 1 AAAAGCTGGGTTGAGACGGCGTAA  | miRNA | miR-320d |
| t0079181 | 23 | 1 AAAAGCTGGGTTGAGAGGGAGGT   | miRNA | miR-320d |
| t0079460 | 23 | 1 AAAAGCTGGGTGGAGAGGGCGTA   | miRNA | miR-320d |
| t0080195 | 22 | 1 AAAAGCTGTGTTGAGAGGGCGT    | miRNA | miR-320d |
| t0080233 | 24 | 1 AAAAGCTGGGTTGAGAGGGACGAAT | miRNA | miR-320d |
| t0080316 | 22 | 1 GAAAGCTGGGTTGAGAGGGCGC    | miRNA | miR-320d |
| t0080358 | 21 | 1 AAAGCTGGGATGAGAGGGCAT     | miRNA | miR-320d |
| t0080669 | 22 | 1 AAAAAGCTGGGTTGAGAGGGCGG   | miRNA | miR-320d |
| t0081084 | 23 | 1 AAAAGCGGGGTTGAGAGGGCGTT   | miRNA | miR-320d |
| t0081368 | 22 | 1 AAAGCTGGGGTGAGAGGGCGTC    | miRNA | miR-320d |
| t0081496 | 22 | 1 AAAAGCTGGGTTGACAGGGCAT    | miRNA | miR-320d |
| t0081616 | 23 | 1 AAAAGATGGTTTGAGAGGGCGTA   | miRNA | miR-320d |
| t0081991 | 23 | 1 TAAAGCTGGGTTGAGAGGGAGAT   | miRNA | miR-320d |
| t0082224 | 22 | 1 AAAAGCTCGGTTGAGAGGGAGA    | miRNA | miR-320d |
| t0082900 | 23 | 1 AAAGGCTAGGTTGAGAGGGCGTA   | miRNA | miR-320d |
| t0083005 | 20 | 1 AAAAGCTGGGTTGAGGGCGA      | miRNA | miR-320d |
| t0083233 | 21 | 1 AAAAGCTGGGTTGAGAGGGCGT    | miRNA | miR-320d |
| t0084094 | 23 | 1 AAAAGCTGGGTTGAGAGGGACGAT  | miRNA | miR-320d |
| t0084459 | 23 | 1 AAAAGCTGGGTTGAGAGGGGATA   | miRNA | miR-320d |
| t0084476 | 20 | 1 AAAAGCTGGGTTGAGAGGGCA     | miRNA | miR-320d |
| t0084509 | 22 | 1 AAAAGCTGGGTTGAGAGGGACT    | miRNA | miR-320d |
| t0084511 | 23 | 1 AAAAGATGGGTTGAAAGGGCGTT   | miRNA | miR-320d |
| t0084831 | 23 | 1 AAAAGCTGGGTTTAGAGGGCGCT   | miRNA | miR-320d |
| t0085075 | 22 | 1 AAAAGCTGGGTTGATAGGGCGT    | miRNA | miR-320d |
| t0085114 | 22 | 1 AAAAGCTGGGTTGAGATGGAGT    | miRNA | miR-320d |
| t0085164 | 23 | 1 GAAAGCTGGGTTGAGAGGGCATA   | miRNA | miR-320d |
| t0085266 | 22 | 1 AAAAGCTGGGTTGGGAGGGCAT    | miRNA | miR-320d |

|          |    |                            |       |          |
|----------|----|----------------------------|-------|----------|
| t0085625 | 22 | 1 AAAAGCTGGTTTGAGAGGGCTA   | miRNA | miR-320d |
| t0085734 | 23 | 1 GAAAAGCTGGGTTGAGAGGGCGG  | miRNA | miR-320d |
| t0085797 | 20 | 1 AAAGCTGGGTTGAGAAGGAG     | miRNA | miR-320d |
| t0085908 | 22 | 1 CAAGCTGGGTTGAGAGGGCGTT   | miRNA | miR-320d |
| t0086068 | 23 | 1 AAAAGCTGTGTTGAGAGGGCGTA  | miRNA | miR-320d |
| t0086161 | 23 | 1 AAAAGCTGGGTTGAGAGGTCTGAA | miRNA | miR-320d |
| t0086264 | 21 | 1 AAAGCTGGGTTGAGAGGCCGA    | miRNA | miR-320d |
| t0086665 | 22 | 1 AAAGCTGGGTTGAGAGGGTGTA   | miRNA | miR-320d |
| t0086818 | 24 | 1 AAAAGCTGGGTTGAGAGGGCGCA  | miRNA | miR-320d |
| t0086883 | 23 | 1 AAAAGTTGGGTTGAGAGGGAGAC  | miRNA | miR-320d |
| t0087084 | 24 | 1 GAAAAGATGGGTTGAGAGGGCGTT | miRNA | miR-320d |
| t0087109 | 23 | 1 AAAAGCTGGGTTGACAGGGCGTT  | miRNA | miR-320d |
| t0087177 | 24 | 1 AAAAGCTGGGTTGAGAGGGCGTTT | miRNA | miR-320d |
| t0087457 | 23 | 1 AAAAGCTGTGTTGAGAGGGCGGT  | miRNA | miR-320d |
| t0087565 | 23 | 1 AAAAGATGCGTTGAGAGGGCGTT  | miRNA | miR-320d |
| t0087678 | 23 | 1 AAAAGCTGGGTTAAGAGGGCGGT  | miRNA | miR-320d |
| t0088804 | 22 | 1 AAAAGCTGGGTTGAGAGGCCGTA  | miRNA | miR-320d |
| t0088854 | 21 | 1 AAGGCTGGGTTGAGAGGGCGT    | miRNA | miR-320d |
| t0089010 | 22 | 1 AAAAGCTGGGTTGAGAGGCCGCA  | miRNA | miR-320d |
| t0089272 | 23 | 1 AAAAGCTGGGTTGAGCGGGCGGT  | miRNA | miR-320d |
| t0089551 | 23 | 1 AAAAGATGGGTTGAGAGGGAGAA  | miRNA | miR-320d |
| t0089578 | 22 | 1 AAAGCTGGGTTGAGATGGCGTT   | miRNA | miR-320d |
| t0089686 | 22 | 1 AAAAGCTGGGTTGAGAGGGGTT   | miRNA | miR-320d |
| t0089712 | 23 | 1 AAAAGCTGGTTTTCGAGGGCGTA  | miRNA | miR-320d |
| t0090052 | 23 | 1 AAAAGCTGGGTTGAGTGGGCTAA  | miRNA | miR-320d |
| t0090152 | 24 | 1 AAAAGCTGGGTTGAGAGGGAGAGA | miRNA | miR-320d |
| t0090252 | 23 | 1 AAAAGCTCGGTTGAGAGGGCGTT  | miRNA | miR-320d |
| t0090460 | 22 | 1 AAAAGCTGGGTTGAGATGGCGC   | miRNA | miR-320d |
| t0090944 | 24 | 1 AAAAGCTGGGTTGAGAGGGGGAAG | miRNA | miR-320d |
| t0091102 | 21 | 1 AAAGCTGGGTTGAGAGGGAAA    | miRNA | miR-320d |
| t0091309 | 23 | 1 AAAAGCTGGGTTGAGAGGGAGGA  | miRNA | miR-320d |
| t0091409 | 22 | 1 AAAAGTCGGGTTGAGAGGGCGG   | miRNA | miR-320c |
| t0091485 | 21 | 1 AAAATCGGGTTGAGAGGGCGA    | miRNA | miR-320c |
| t0091540 | 22 | 1 AAAAGTCGGGTTGAGAGGGCGC   | miRNA | miR-320c |
| t0091847 | 21 | 1 GAAAGCCGGGTTGAGAGGGCG    | miRNA | miR-320c |
| t0091865 | 22 | 1 AAAAGGCGGGTTGAGAGGGCGA   | miRNA | miR-320c |
| t0092046 | 22 | 1 AAAAGTCGGGTCGAGAGGGCGT   | miRNA | miR-320c |
| t0092194 | 22 | 1 AAAAGTCGGGTTGAGAGGGAGA   | miRNA | miR-320c |
| t0092299 | 23 | 1 AAAAGCTGGGTTGAGAGGGCAAT  | miRNA | miR-320b |
| t0092448 | 23 | 1 AAAAGCTGGGTTGAAAGGGCAAA  | miRNA | miR-320b |
| t0092852 | 23 | 1 AAAAGCTGGGTTGAGCGGGCAAA  | miRNA | miR-320b |
| t0092859 | 22 | 1 AAAGCTGGGCTGAGAGGGCAAA   | miRNA | miR-320b |
| t0093056 | 21 | 1 AAAAGCTGGGTTGAGGGGGCA    | miRNA | miR-320b |
| t0093442 | 22 | 1 AAAAGCTAGGTTGAGAGGGCAA   | miRNA | miR-320b |
| t0047479 | 22 | 1 AAAAGCTGGGTTAAGAGGGCAA   | miRNA | miR-320b |
| t0052113 | 22 | 1 AAAAGCTGGGTTGAGAGAGCAA   | miRNA | miR-320b |
| t0066321 | 22 | 1 AAAAGATGGGTTGAGAGGGCAA   | miRNA | miR-320b |
| t0079293 | 24 | 1 AAAAGCTGGGTTGAGAGGGCAAAT | miRNA | miR-320b |
| t0080632 | 22 | 1 AAAAGCTGGGTAGAGAGGGCAA   | miRNA | miR-320b |
| t0081860 | 22 | 1 AAAAGCCGGGTTGAGAGGGCAA   | miRNA | miR-320b |
| t0087195 | 22 | 1 AAAAGTTGGGTTGAGAGGGCAA   | miRNA | miR-320b |
| t0042431 | 23 | 1 AAAAGCTGGGTTGAGCGGGCAAT  | miRNA | miR-320b |
| t0045727 | 21 | 1 AAAAGCTGGGTTGATAGGGCA    | miRNA | miR-320b |
| t0045811 | 20 | 1 AAAGATGGGTTGAGAGGGCA     | miRNA | miR-320b |
| t0046260 | 20 | 1 AAAGCTGGGTTGAAAGGGCA     | miRNA | miR-320b |
| t0049775 | 21 | 1 AAAAGCTGGGTTGCGAGGGCA    | miRNA | miR-320b |
| t0050677 | 23 | 1 AAAGGCTGGGTTGAGAGGGCAAT  | miRNA | miR-320b |
| t0050755 | 21 | 1 AAAAGCTGGGTTGAGAGAGCA    | miRNA | miR-320b |

|          |    |                              |       |          |
|----------|----|------------------------------|-------|----------|
| t0050977 | 23 | 1 AAAAGTTGGGTTGAGAGGGCAAA    | miRNA | miR-320b |
| t0053013 | 22 | 1 AAAAGCTGGGTTGAGGGGCAA      | miRNA | miR-320b |
| t0057489 | 22 | 1 AAAAGCTGGATTGAGAGGGCAA     | miRNA | miR-320b |
| t0058170 | 22 | 1 AAAAGCTGGGTCGAGAGGGCAA     | miRNA | miR-320b |
| t0060143 | 23 | 1 AAAAGCTGGGTTGAGAGGGCAAC    | miRNA | miR-320b |
| t0066049 | 22 | 1 AGAAGCTGGGTTGAGAGGGCAA     | miRNA | miR-320b |
| t0066706 | 22 | 1 AAAAGCTGTGTTGAGAGGGCAA     | miRNA | miR-320b |
| t0068861 | 25 | 1 AAAAGCTGGGTTGAGAGGGCAATAT  | miRNA | miR-320b |
| t0069240 | 20 | 1 AAAAGCTGGGTTGAAAGGGC       | miRNA | miR-320a |
| t0071495 | 21 | 1 AAAAGTTGGGGTGAGAGGGCG      | miRNA | miR-320a |
| t0073943 | 22 | 1 GAAAAGCTGGGTTGCGAGGGCG     | miRNA | miR-320a |
| t0074515 | 24 | 1 AAAAGCTGGGTTGAGCGGGCGATA   | miRNA | miR-320a |
| t0075433 | 22 | 1 GAAAAGCTGGGTTGAGCGGGCG     | miRNA | miR-320a |
| t0076920 | 22 | 1 AAAAGATGCGTTGAGAGGGCGA     | miRNA | miR-320a |
| t0082980 | 24 | 1 AAAAGCTGGATTGAGAGGGCGAGA   | miRNA | miR-320a |
| t0086473 | 20 | 1 AAAGCTGCGTTGAGAGGGCG       | miRNA | miR-320a |
| t0087035 | 24 | 1 AAAAGCTGGGTTGAGAGGGCGATT   | miRNA | miR-320a |
| t0087977 | 25 | 1 AAAAAGCTGGGTTGAGAGGGCGAAGT | miRNA | miR-320a |
| t0088522 | 24 | 1 AAAAGCTGGGGTGAGAGGGCGAAG   | miRNA | miR-320a |
| t0090476 | 21 | 1 GAAGCTGGGTTGAGAGGGCGA      | miRNA | miR-320a |
| t0090624 | 22 | 1 GAAAAGCTGGGTTGAGAGAGCG     | miRNA | miR-320a |
| t0040776 | 24 | 1 AAAAGCTGGGTTGAAAGGGCGAAA   | miRNA | miR-320a |
| t0041414 | 23 | 1 AAAAGCTCGGTTGAGAGGGCGAT    | miRNA | miR-320a |
| t0041627 | 24 | 1 AGAAGCTGGGTTGAGAGGGCGAAT   | miRNA | miR-320a |
| t0042013 | 23 | 1 AAAAGCTGGTTTAAGAGGGCGAA    | miRNA | miR-320a |
| t0042186 | 21 | 1 AGAAGCTGGGTTGAGAGGGCG      | miRNA | miR-320a |
| t0042189 | 19 | 1 AACAGGGTTGAGAGGGCGA        | miRNA | miR-320a |
| t0042716 | 22 | 1 AAAAGCTGGGGTGATAGGGCGA     | miRNA | miR-320a |
| t0043400 | 23 | 1 AAAAAGCTGGGTTGAGAGGGCGAG   | miRNA | miR-320a |
| t0043770 | 23 | 1 AAAATCTGTGTTGAGAGGGCGAA    | miRNA | miR-320a |
| t0044084 | 22 | 1 GAAAAGCTAGGTTGAGAGGGCG     | miRNA | miR-320a |
| t0044632 | 23 | 1 AAAAGCTGGGTTGAGAAGGGCGAT   | miRNA | miR-320a |
| t0045320 | 25 | 1 AAAAGCTGGGGTGAGAGGGCGATTT  | miRNA | miR-320a |
| t0045359 | 21 | 1 AAAAGCTGGCTTGAGAGGGCG      | miRNA | miR-320a |
| t0045962 | 23 | 1 AAAAGCTGGGTTGAGCGGGCGAG    | miRNA | miR-320a |
| t0048498 | 25 | 1 CGAAAAGCTGGGTTGAGAGGGCGAA  | miRNA | miR-320a |
| t0048555 | 21 | 1 AAAATCTGGGTTGAGAGGGCG      | miRNA | miR-320a |
| t0048734 | 24 | 1 AAAAGGTGGGTTGAGAGGGCGAAT   | miRNA | miR-320a |
| t0048923 | 21 | 1 AAAAGCTGGGTGAGAGGGCG       | miRNA | miR-320a |
| t0049222 | 22 | 1 AAACGATGGGTTGAGAGGGCGA     | miRNA | miR-320a |
| t0050505 | 24 | 1 AAAAGCTGGGTTGAGAGAGCGATA   | miRNA | miR-320a |
| t0050819 | 23 | 1 GAAAAGCTGGGATGAGAGGGCGA    | miRNA | miR-320a |
| t0051327 | 23 | 1 AAAAGCTGGGTTGAGAGCGCGAG    | miRNA | miR-320a |
| t0052016 | 23 | 1 AGAAGCTGGGTTGAGAGGGCGAG    | miRNA | miR-320a |
| t0052039 | 21 | 1 ATAAGCTGGGTTGAGAGGGCG      | miRNA | miR-320a |
| t0052137 | 23 | 1 AAGAGCTGGGTTGAGAGGGCGAG    | miRNA | miR-320a |
| t0052688 | 21 | 1 AAAAGCCGATTGAGAGGGCG       | miRNA | miR-320a |
| t0053524 | 21 | 1 CAAAGCTGGGTTGAGAGGGCG      | miRNA | miR-320a |
| t0053892 | 21 | 1 AAAGCTAGGTTGAGAGGGCGA      | miRNA | miR-320a |
| t0055442 | 24 | 1 CAAAAGCTGGGTTGAGAGGGCGAA   | miRNA | miR-320a |
| t0058449 | 21 | 1 AAAGCTGGGTCGAGAGGGCGA      | miRNA | miR-320a |
| t0059554 | 23 | 1 AAAAGCTGGGTCGAGATGGCGAA    | miRNA | miR-320a |
| t0059751 | 23 | 1 AAAAGTTGGGTTGAGAGGGCGAG    | miRNA | miR-320a |
| t0059864 | 23 | 1 AAAAGCTGGGTTGATAGGGCGAT    | miRNA | miR-320a |
| t0059882 | 20 | 1 AAAGCTGGGTTGCGAGGGCG       | miRNA | miR-320a |
| t0060363 | 22 | 1 AAAGCTGGGTTGAGAAGGGCGAT    | miRNA | miR-320a |
| t0061939 | 23 | 1 AAAGCTGGGTTGAGAGAGCGATG    | miRNA | miR-320a |
| t0062110 | 24 | 1 AAAAGCTGGGTTGGGAGGGCGAAT   | miRNA | miR-320a |

|          |    |                              |       |          |
|----------|----|------------------------------|-------|----------|
| t0062300 | 20 | 1 AAAGCTGGGTTGAGCGGGCG       | miRNA | miR-320a |
| t0062445 | 23 | 1 AAAAGCTGGGTGGAGAGGGCGAT    | miRNA | miR-320a |
| t0063245 | 23 | 1 AAAAGCTGGGTTGAGGGGGCGAG    | miRNA | miR-320a |
| t0064608 | 23 | 1 AAAAGCTGGGTAGAGAGGGCGAA    | miRNA | miR-320a |
| t0064719 | 21 | 1 AATAGCTGGGTTGAGATGGCG      | miRNA | miR-320a |
| t0064892 | 23 | 1 TAAAGCTGGGTTGAGAGGGCGAA    | miRNA | miR-320a |
| t0065007 | 24 | 1 AAAAGCTGGGGTGGAGAGGGCGAAT  | miRNA | miR-320a |
| t0066935 | 21 | 1 AAAAAGCTGGGTTGAGATGGCG     | miRNA | miR-320a |
| t0067173 | 22 | 1 AAAAGCTCGGTTGAGTGGGCGA     | miRNA | miR-320a |
| t0067498 | 20 | 1 AAAAGCTGGGTTGAGAGGGCG      | miRNA | miR-320a |
| t0067886 | 23 | 1 GAAAAGCTGGGTTGAGAGAGCGA    | miRNA | miR-320a |
| t0068526 | 23 | 1 AAAAGCTGGGTGGAGAGGGCGAA    | miRNA | miR-320a |
| t0068581 | 24 | 1 AAAAGCTGGGTTGAGATGGCGAAT   | miRNA | miR-320a |
| t0068665 | 21 | 1 AAAGCTGGATTGAGAGGGCGA      | miRNA | miR-320a |
| t0068722 | 22 | 1 AAAAGTAGGGTTGAGAGGGCGA     | miRNA | miR-320a |
| t0068980 | 23 | 1 AAAAGCTGGGATGAGAGGGCGAG    | miRNA | miR-320a |
| t0069268 | 21 | 1 AAAGCTGGGTTGGGAGGGCGA      | miRNA | miR-320a |
| t0069596 | 21 | 1 AAAACCTGGGTTGAGAGGGCG      | miRNA | miR-320a |
| t0069686 | 21 | 1 AAGAGCTGGGTTGAGAGGGCG      | miRNA | miR-320a |
| t0070737 | 22 | 1 AAAAGCTGGGTTCGAGATGGCGA    | miRNA | miR-320a |
| t0071341 | 20 | 1 AGAGCTGGGTTGAGAGGGCG       | miRNA | miR-320a |
| t0071404 | 23 | 1 AAACGTTGGGTTGAGAGGGCGAC    | miRNA | miR-320a |
| t0072307 | 20 | 1 AAAGCTGGGTTGAGAGAGCG       | miRNA | miR-320a |
| t0072902 | 22 | 1 AAAGCTGGGTTCGAGAGGGCGAT    | miRNA | miR-320a |
| t0072950 | 22 | 1 AACAGCTGGGTTGAGATGGCGA     | miRNA | miR-320a |
| t0073477 | 22 | 1 AAGAGCTGAGTTGAGAGGGCGA     | miRNA | miR-320a |
| t0073545 | 22 | 1 AAAGCTGGGTTGGGAGGGCGAA     | miRNA | miR-320a |
| t0073618 | 23 | 1 AAAAGCTGGGTTGGGAGGGCGAC    | miRNA | miR-320a |
| t0074422 | 21 | 1 AAAGCTGGGTTGAGGGGGCGA      | miRNA | miR-320a |
| t0074879 | 24 | 1 AAAAGCTGGGTTCGAGAGGGCGACA  | miRNA | miR-320a |
| t0075015 | 21 | 1 AACGCTGGGTTGAGAGGGCGA      | miRNA | miR-320a |
| t0075082 | 22 | 1 AAAGGCTGGGTTGAGTGGGCGA     | miRNA | miR-320a |
| t0075253 | 23 | 1 GAAAAGCTGGGTTGAGCGGGCGA    | miRNA | miR-320a |
| t0075675 | 23 | 1 AAAAAGCTGGGTTGAGAGGGCGA    | miRNA | miR-320a |
| t0076299 | 24 | 1 AAAAGATGGGTTGAGAGGGCGAAA   | miRNA | miR-320a |
| t0076702 | 20 | 1 TAAGCTGGGTTGAGAGGGCG       | miRNA | miR-320a |
| t0076909 | 23 | 1 AAAGGCTGGGGTGGAGAGGGCGAA   | miRNA | miR-320a |
| t0077069 | 23 | 1 AAAAGCTGGGTTTAGAGGGCGAA    | miRNA | miR-320a |
| t0078104 | 21 | 1 AAACGCTGGGTTGAGAGGGCG      | miRNA | miR-320a |
| t0078525 | 24 | 1 AAAAGCCGGGTTGAGAGGGCGAAA   | miRNA | miR-320a |
| t0078779 | 23 | 1 AAAAGCGGGGTTGAGAGGGCGAA    | miRNA | miR-320a |
| t0078781 | 21 | 1 AATAGCTGGGTTGAGAGGGCG      | miRNA | miR-320a |
| t0079324 | 23 | 1 AAAAGCAGGGTTGAGAGGGCGAG    | miRNA | miR-320a |
| t0079378 | 23 | 1 AAAAGCTGGGTTGAGAGTGCAGAA   | miRNA | miR-320a |
| t0080576 | 24 | 1 GAAAGCTGGGTTGAGAGGGCGATT   | miRNA | miR-320a |
| t0080818 | 21 | 1 AAAACTGGGTTGAGAGGGCGA      | miRNA | miR-320a |
| t0080933 | 21 | 1 AAAAGCGGGGTTGAGAGGGCG      | miRNA | miR-320a |
| t0081636 | 21 | 1 AAAAGCTGGGTTGACAGGGCG      | miRNA | miR-320a |
| t0081919 | 26 | 1 CTGGAAGAGCTGGGTTGAGAGGGCGA | miRNA | miR-320a |
| t0081921 | 21 | 1 AAAAGCTGGGTTGAGTGGGCG      | miRNA | miR-320a |
| t0082332 | 24 | 1 AAAAGCTGGGTTGCGAGGGCGAAT   | miRNA | miR-320a |
| t0082673 | 21 | 1 AAGCCGGGTTGCGAGGGCGAA      | miRNA | miR-320a |
| t0083773 | 23 | 1 AAAAGCTGTGTTGAGAGGGCGAG    | miRNA | miR-320a |
| t0084081 | 22 | 1 AAAAGCTAGGTTGAGATGGCGA     | miRNA | miR-320a |
| t0084642 | 21 | 1 AAAGCTGGGTTGTGAGGGCGA      | miRNA | miR-320a |
| t0085170 | 25 | 1 CCAAAAAGCTGGGTTGAGCGGGCGA  | miRNA | miR-320a |
| t0085261 | 22 | 1 AAAACTGGGTTGAGAGGGCGAA     | miRNA | miR-320a |
| t0085414 | 21 | 1 AAAGCTGGGGTGGAGAGGGCGA     | miRNA | miR-320a |



|          |    |                              |       |             |
|----------|----|------------------------------|-------|-------------|
| t0085742 | 24 | 1 GAAAAGCTGGGTTGAGGGGGCGAT   | miRNA | miR-320a    |
| t0085945 | 21 | 1 AAAGCTGGGTTGAGAGAGCGA      | miRNA | miR-320a    |
| t0085950 | 24 | 1 AAAAGCTGGGTTGAGAGCGCGAAT   | miRNA | miR-320a    |
| t0086030 | 22 | 1 AAAAGTTGGGTTGGGAGGGCGA     | miRNA | miR-320a    |
| t0086985 | 24 | 1 ACAAGCTGGGTTGAGAGGGCGAAT   | miRNA | miR-320a    |
| t0087020 | 23 | 1 AAAAGCTGGGTCGAGAGGGCGAG    | miRNA | miR-320a    |
| t0087393 | 23 | 1 AAACGCTGCGTTGAGAGGGCGAT    | miRNA | miR-320a    |
| t0088092 | 23 | 1 AAAAATTGGGTTGAGAGGGCGAA    | miRNA | miR-320a    |
| t0088276 | 23 | 1 AAAAGCTTGTGTTGAGAGGGCGAA   | miRNA | miR-320a    |
| t0088290 | 24 | 1 AAGAGCTGGGTTGAGAGGGCGAAT   | miRNA | miR-320a    |
| t0088831 | 23 | 1 AAAAGCTGGGTTGAGAAGGCGAC    | miRNA | miR-320a    |
| t0089182 | 20 | 1 AAAGCTGGGTTGGGAGGGCG       | miRNA | miR-320a    |
| t0089427 | 21 | 1 GAAGGGGAAGAGCTTTAATG       | miRNA | miR-3202    |
| t0089742 | 23 | 1 AATCCGAGAAGGCGCACAAGGTT    | miRNA | miR-3200-5p |
| t0089866 | 23 | 1 AATCTGAGAAGGCGCACATGGTT    | miRNA | miR-3200-5p |
| t0090345 | 24 | 1 AATCTGAGAAGGTGCACAAGGTTT   | miRNA | miR-3200-5p |
| t0091063 | 22 | 1 AATCTGAGAAGGCGTACAAGGT     | miRNA | miR-3200-5p |
| t0091112 | 23 | 1 AATCTGAGAAGGCGCAGAAGGTT    | miRNA | miR-3200-5p |
| t0091574 | 23 | 1 AATCTGAGAAGGCGCCCAAGGTT    | miRNA | miR-3200-5p |
| t0091817 | 23 | 1 AATTTGAGAAGGCGCACAAGGTT    | miRNA | miR-3200-5p |
| t0092182 | 24 | 1 AATCTGAGAAGGCGCACAAGGATT   | miRNA | miR-3200-5p |
| t0092205 | 24 | 1 AATATGAGAAGGCGCACAAGGTTT   | miRNA | miR-3200-5p |
| t0092876 | 26 | 1 GAATCTGAGAAGGCGCACAAGGGAGA | miRNA | miR-3200-5p |
| t0093124 | 24 | 1 AATCTGAGAAGGCGCACAAGGTT    | miRNA | miR-3200-5p |
| t0093477 | 22 | 1 AATCTGAGAAGGAGCACAAGGT     | miRNA | miR-3200-5p |
| t0082309 | 23 | 1 AATCTGCGAAGGCGCACAAGGGT    | miRNA | miR-3200-5p |
| t0041020 | 23 | 1 GAATCTGAGAAGGAGCACAAGGT    | miRNA | miR-3200-5p |
| t0042965 | 23 | 1 AATCTGAGAAGGCGAACAAGGTT    | miRNA | miR-3200-5p |
| t0048964 | 23 | 1 AATCTGAGAGGGCGCACAAGGTT    | miRNA | miR-3200-5p |
| t0049066 | 22 | 1 AATCAGAGAAGGCGCACAAGGT     | miRNA | miR-3200-5p |
| t0053683 | 25 | 1 AATCCGAGAAGGCGCACAAGGTTTG  | miRNA | miR-3200-5p |
| t0054357 | 25 | 1 AATCTGAGAAGGCGCACCAGGTTTG  | miRNA | miR-3200-5p |
| t0054988 | 24 | 1 AATCTGAGAAGGCGCACAAGGAAA   | miRNA | miR-3200-5p |
| t0055638 | 24 | 1 CATCTGAAAAGGCGCACAAGGTTT   | miRNA | miR-3200-5p |
| t0056550 | 23 | 1 AATCTGAGAAGGCGCTCAAGGTT    | miRNA | miR-3200-5p |
| t0057963 | 23 | 1 AATCTGGGAAGGCGCACAAGGTT    | miRNA | miR-3200-5p |
| t0065824 | 23 | 1 AATCTGAGAAGGCGCACAAGGCA    | miRNA | miR-3200-5p |
| t0066077 | 23 | 1 AATCTGAGATGGCGCACAAGGTT    | miRNA | miR-3200-5p |
| t0067204 | 22 | 1 ACCTTGCGCTACTCAGGGCTGT     | miRNA | miR-3200-3p |
| t0073183 | 21 | 1 CAACTTGCGCTACTCAGGTCT      | miRNA | miR-3200-3p |
| t0074644 | 20 | 1 CACCTTGCGTTACTCAGGTC       | miRNA | miR-3200-3p |
| t0079823 | 21 | 1 CACCTTGCGCTACTCGGGTCT      | miRNA | miR-3200-3p |
| t0081021 | 21 | 1 CACTTTGCGCTACTCAGGTCT      | miRNA | miR-3200-3p |
| t0081721 | 20 | 1 CACCTTGCGCTACTCAGGCC       | miRNA | miR-3200-3p |
| t0082521 | 22 | 1 CACCTTGCGATACTCAGGTCTG     | miRNA | miR-3200-3p |
| t0083769 | 21 | 1 CACCTTGGGCTACTCAGGTCT      | miRNA | miR-3200-3p |
| t0084339 | 22 | 1 GTGGAGTCCTGGGGAATGGAGC     | miRNA | miR-3198    |
| t0084534 | 22 | 1 CTCCTGCGTAGGATCTGAGGCA     | miRNA | miR-3193    |
| t0085071 | 22 | 1 CTCCTGCGGAGGATCTGAGGAA     | miRNA | miR-3193    |
| t0089279 | 22 | 1 CTCCTGCGTAGGCTCTGAGGAA     | miRNA | miR-3193    |
| t0090319 | 22 | 1 TCCGGGAGGTTGTAGCAGTGGA     | miRNA | miR-3192    |
| t0049356 | 22 | 1 TCTGGGAGTTTGTAGAAGTGGA     | miRNA | miR-3192    |
| t0050186 | 22 | 1 TCTGGGAGGTTGTAGCAGTGGC     | miRNA | miR-3192    |
| t0056668 | 22 | 1 TCTGGGAGGTTGTAGCAGAGGA     | miRNA | miR-3192    |
| t0058293 | 21 | 1 TCTGGGAGGTTGTAGTAGTGG      | miRNA | miR-3192    |
| t0068150 | 22 | 1 TCTGGGAGGTTGTAGTAGTGG      | miRNA | miR-3192    |
| t0081758 | 22 | 1 TCTGGGAGGTTGTAGCCGTGGA     | miRNA | miR-3192    |
| t0083692 | 21 | 1 TCTGGGAGATTGTAGCAGTGA      | miRNA | miR-3192    |

|          |    |                             |       |              |
|----------|----|-----------------------------|-------|--------------|
| t0086999 | 22 | 1 TCTGGGAGGTTGTAGCGGTGGA    | miRNA | miR-3192     |
| t0065635 | 22 | 1 TCTGGGAGGTTGGAGCAGTGGA    | miRNA | miR-3192     |
| t0053880 | 20 | 1 GTGGAAGGTAGACGGCCCGA      | miRNA | miR-3190     |
| t0064035 | 21 | 1 TGAAAGGTAGACGGCCAGAGA     | miRNA | miR-3190     |
| t0073491 | 21 | 1 GTGGAAGGTAGACGGCCAGGG     | miRNA | miR-3190     |
| t0043968 | 20 | 1 GTGGAAGGGAGACGGCCAGA      | miRNA | miR-3190     |
| t0045770 | 21 | 1 TGGAAGGGAGACGGCCAGAGA     | miRNA | miR-3190     |
| t0046886 | 24 | 1 GTGGAAGGTAGACGGCCAGAGCGA  | miRNA | miR-3190     |
| t0054144 | 21 | 1 TGGAAGGTAGACGGCCAGAGC     | miRNA | miR-3190     |
| t0054660 | 21 | 1 GTGGAAGGTAGACGGCCAGAG     | miRNA | miR-3190     |
| t0058374 | 20 | 1 TGGAAGGTAGACGGCCCGAG      | miRNA | miR-3190     |
| t0074577 | 22 | 1 GTGGAAGGTAGACAGACAGAGA    | miRNA | miR-3190     |
| t0077163 | 20 | 1 GGAAGGTAGACGGCCAGAG       | miRNA | miR-3190     |
| t0080903 | 21 | 1 TGGAAGGAAGACGGCCAGAGA     | miRNA | miR-3190     |
| t0092332 | 23 | 1 TGGAAGGTAGACGGACAGAGAGA   | miRNA | miR-3190     |
| t0041981 | 20 | 1 TGGAAGGTAGACGGCCAGAG      | miRNA | miR-3190     |
| t0042752 | 21 | 1 TGGAAGGTAGACGGCCAGAGA     | miRNA | miR-3190     |
| t0044005 | 21 | 1 GTGGAAGGTAGACGGACAGAG     | miRNA | miR-3190     |
| t0044627 | 22 | 1 TGTGGAAGGTAGACGGCCAGAG    | miRNA | miR-3190     |
| t0047505 | 22 | 1 TGGAAGGTAGACGACCAGAGTT    | miRNA | miR-3190     |
| t0050780 | 21 | 1 TGGAAGGTAGACAGCCAGAGA     | miRNA | miR-3190     |
| t0056905 | 22 | 1 TAGAAGGGGGAAATTTAAACG     | miRNA | miR-3179     |
| t0057307 | 22 | 1 TAGGAGGGGTGAAATTTAAACG    | miRNA | miR-3179     |
| t0058645 | 21 | 1 CGGGGAGAGAACGCAGTGCCG     | miRNA | miR-3175     |
| t0058759 | 21 | 1 CGGGGAGAGAACGCAGTGA       | miRNA | miR-3175     |
| t0066556 | 22 | 1 TGTGACTTTAAGGGAAATGGAG    | miRNA | miR-3164     |
| t0072301 | 21 | 1 TATGAAATGAGGGCAGTAAGA     | miRNA | miR-3163     |
| t0075490 | 22 | 1 GAGGAGATCGTTCGAGGTTGCC    | miRNA | miR-3150b-3p |
| t0076496 | 19 | 1 TGAGGAGATCGTTCGAGGTT      | miRNA | miR-3150b-3p |
| t0084507 | 19 | 1 TGAGGAGATTGTTCGAGGTT      | miRNA | miR-3150b-3p |
| t0084908 | 23 | 1 CATGCTAGGATAGAGAAATGGG    | miRNA | miR-3146     |
| t0085090 | 21 | 1 AGCTTTTGGGAATTCAGGAAG     | miRNA | miR-3140-3p  |
| t0089722 | 21 | 1 AGCTTTTGGGAATGCAGGTAG     | miRNA | miR-3140-3p  |
| t0093252 | 22 | 1 TGTGGACAGTGAGGTAGAAGGA    | miRNA | miR-3138     |
| t0045327 | 23 | 1 TGTGGACAGTGAGGTAGAGGGCG   | miRNA | miR-3138     |
| t0050818 | 22 | 1 TGTGGACAGTGAGGAAGAGGGA    | miRNA | miR-3138     |
| t0066504 | 23 | 1 TGTGGACAGTGAGGGAGAGGGAG   | miRNA | miR-3138     |
| t0076459 | 24 | 1 TGTGGACAGTGAGGTAGAGGGCGA  | miRNA | miR-3138     |
| t0067751 | 20 | 1 GGCTGGTCCGAGGGCAGGGG      | miRNA | miR-3135b    |
| t0092120 | 22 | 1 GGCTGGGCCGAGTGCAGTGGTG    | miRNA | miR-3135b    |
| t0049706 | 23 | 1 GGCTGGTCCGAGTGCAGGGGTGT   | miRNA | miR-3135b    |
| t0055547 | 22 | 1 GGCTGGTCCGAGTGGAGTGGTG    | miRNA | miR-3135b    |
| t0072568 | 24 | 1 GACTGGTCCGAGTGCAGTGGTGTT  | miRNA | miR-3135b    |
| t0072454 | 22 | 1 GGCTGGTCTGAGTGCCGTGGTG    | miRNA | miR-3135b    |
| t0049271 | 23 | 1 GACTGGTCCGAGTGCAGTGGTG    | miRNA | miR-3135b    |
| t0063451 | 23 | 1 GGCTGGTACGAGTGCAGTGGTG    | miRNA | miR-3135b    |
| t0041173 | 23 | 1 GGCTGGTCCGAGTGCAGTGGTG    | miRNA | miR-3135b    |
| t0042685 | 24 | 1 GGCTGGTCCGAATGCAGTGGTGTT  | miRNA | miR-3135b    |
| t0066359 | 22 | 1 GACTGGTCCGAGTGCAGTGGTG    | miRNA | miR-3135b    |
| t0070801 | 26 | 1 GGCTGGTCCGAGTGCAGTGGGTTTA | miRNA | miR-3135b    |
| t0086271 | 22 | 1 GGCTGGTCCGAGGGCAGTGGTG    | miRNA | miR-3135b    |
| t0048493 | 24 | 1 GGCTGGGCCGAGTGCAGTGGGTT   | miRNA | miR-3135b    |
| t0052458 | 24 | 1 GGCTGGTCCGAGTGCAGTGGGTT   | miRNA | miR-3135b    |
| t0052909 | 23 | 1 GGCTGGTCCGAGGGCAGTGGTG    | miRNA | miR-3135b    |
| t0054271 | 24 | 1 GGCTAGTCCGAGTGCAGTGGTGTT  | miRNA | miR-3135b    |
| t0055188 | 24 | 1 GGCTGGTCCGAGTGCAGGGGGTT   | miRNA | miR-3135b    |
| t0055243 | 20 | 1 TGGGAAGAGGAGCTCAGGGA      | miRNA | miR-3132     |
| t0056507 | 23 | 1 GCAGGTTGTGTAGAGTTGGCTTT   | miRNA | miR-3129-5p  |

|          |    |                                |       |            |
|----------|----|--------------------------------|-------|------------|
| t0057635 | 18 | 1 TATTGCACTCACGGCCTG           | miRNA | miR-311-3p |
| t0063579 | 19 | 1 TATTGCTGTCACGGCCTGT          | miRNA | miR-311-3p |
| t0064523 | 23 | 1 CGGAGCAGCTCAGTACAGGAAGA      | miRNA | miR-3107*  |
| t0069007 | 23 | 1 CGGGGCAGCTCAGTACAGGAAGG      | miRNA | miR-3107*  |
| t0069220 | 23 | 1 CGAGGCAGCTCAGTACAGGAAGA      | miRNA | miR-3107*  |
| t0072240 | 22 | 1 AGCTTATGGTGGATTGTCGTTT       | miRNA | miR-3101*  |
| t0072888 | 20 | 1 AGCTTATAGCGGATTGTCGT         | miRNA | miR-3101*  |
| t0076106 | 23 | 1 AGCTTATGGTGGATTGTCGTTTT      | miRNA | miR-3101*  |
| t0080614 | 20 | 1 GAGCTTATGGTGGATTGTCG         | miRNA | miR-3101*  |
| t0084048 | 22 | 1 TGCTTATGGTGGATTGTCGTTT       | miRNA | miR-3101*  |
| t0088940 | 21 | 1 TATTGCACTCATCCCGACCAT        | miRNA | miR-310    |
| t0080315 | 23 | 1 GGAGGCAGATGTTTCGCAAGACTG     | miRNA | miR-31     |
| t0080439 | 23 | 1 CTTTCAGTCGGAAGTTTACAGCA      | miRNA | miR-30e*   |
| t0073623 | 25 | 1 CTTTCAGTCGGATGTTTCCAGCATC    | miRNA | miR-30e*   |
| t0075874 | 20 | 1 ATTTTCAGTCGGATGTTTACA        | miRNA | miR-30e*   |
| t0041105 | 20 | 1 CTTCCAGTCGGATGTTTACA         | miRNA | miR-30e*   |
| t0078451 | 23 | 1 CTTTCAGTCGGATGTTTCCAGCA      | miRNA | miR-30e*   |
| t0087693 | 26 | 1 TGTA AACATCCTTGACTGGAAGAATC  | miRNA | miR-30e    |
| t0045110 | 24 | 1 TGTA AACATCCTTGACTGGAAGAT    | miRNA | miR-30e    |
| t0052135 | 24 | 1 TGTA AACATCCTTCACTGGAAGCT    | miRNA | miR-30e    |
| t0055864 | 26 | 1 TGTA AACATCCTTGACTGGAAGCCTC  | miRNA | miR-30e    |
| t0077938 | 23 | 1 TGTA AACATCCCTGACTGGAAGA     | miRNA | miR-30e    |
| t0092705 | 26 | 1 TGTA AACATCCTTGACTGGAAGGATC  | miRNA | miR-30e    |
| t0060000 | 24 | 1 TGTA AACATCCCCGACAGGAAGCT    | miRNA | miR-30d    |
| t0067757 | 27 | 1 TGTA AACATCGTCGACTGGAAGCTATC | miRNA | miR-30d    |
| t0040895 | 27 | 1 TGTA AACCTCCCCGACTGGAAGCTATC | miRNA | miR-30d    |
| t0049432 | 24 | 1 TGTA GACATCCCCGACTGGAAGCT    | miRNA | miR-30d    |
| t0070477 | 23 | 1 TGTA AACATCCCCGACTGGACGA     | miRNA | miR-30d    |
| t0078121 | 20 | 1 TGAAAACATCCCCGACTGGA         | miRNA | miR-30d    |
| t0091564 | 22 | 1 TGTA CACATCCCCGACTGGAAG      | miRNA | miR-30d    |
| t0042795 | 20 | 1 TGTA AACATCCCAGACTGGA        | miRNA | miR-30d    |
| t0062437 | 21 | 1 TGTA AACATACCCGACTGGAA       | miRNA | miR-30d    |
| t0067054 | 23 | 1 TGTA AACATCCCCGCCTGGAAGC     | miRNA | miR-30d    |
| t0069507 | 24 | 1 TGTA AACATCCACGACTGGAAGCT    | miRNA | miR-30d    |
| t0069889 | 24 | 1 GGTA AACATCCCCGACTGGAAGCT    | miRNA | miR-30d    |
| t0077088 | 25 | 1 TGTA AACATCCCCA ACTGGAAGATC  | miRNA | miR-30d    |
| t0044451 | 24 | 1 TGTA AACATCCCCGACTGGAAGAT    | miRNA | miR-30d    |
| t0045656 | 22 | 1 TATA AACATCCCCGACTGGAAG      | miRNA | miR-30d    |
| t0047822 | 24 | 1 TGCA AACATCCCCGACTGGAAGCT    | miRNA | miR-30d    |
| t0047995 | 24 | 1 TGAAAACATCCCCGACTGGAAGCT     | miRNA | miR-30d    |
| t0053943 | 24 | 1 TGTA AACATCCCCGACTGGACGCT    | miRNA | miR-30d    |
| t0056680 | 26 | 1 TGTA AACATCCCCGACTGGAAGCATT  | miRNA | miR-30d    |
| t0058746 | 24 | 1 TGTA AACACCCCCGACTGGAAGCT    | miRNA | miR-30d    |
| t0062610 | 24 | 1 TGTA AACATTCCCGACTGGAAGCT    | miRNA | miR-30d    |
| t0064772 | 24 | 1 TGTA AACATCCCCGACTGGAAGTT    | miRNA | miR-30d    |
| t0068260 | 26 | 1 TGTA AACATCCCCGACTGGAAGCATA  | miRNA | miR-30d    |
| t0069647 | 26 | 1 TGTA AACATCCCCGACTGGAAGAATA  | miRNA | miR-30d    |
| t0070719 | 21 | 1 TGTA AACATCCCTGACTGGAA       | miRNA | miR-30d    |
| t0070864 | 24 | 1 TGAAAACATCCTACACTCTCAGCT     | miRNA | miR-30c    |
| t0071546 | 21 | 1 TATA AACATCCTACACTCTCA       | miRNA | miR-30c    |
| t0076318 | 24 | 1 TGTA AACATCCTACACTATCAGCT    | miRNA | miR-30c    |
| t0079151 | 21 | 1 TGTA CACATCCTACACTCTCA       | miRNA | miR-30c    |
| t0079447 | 23 | 1 TGTA AACATCCTACACTATCAGC     | miRNA | miR-30c    |
| t0084204 | 20 | 1 TGTA AACATCATACACTCTC        | miRNA | miR-30c    |
| t0086224 | 24 | 1 TGTA AAAATCCTACACTCTCAGCT    | miRNA | miR-30c    |
| t0086824 | 23 | 1 TGTA AACATCCTACACTCTCCGC     | miRNA | miR-30c    |
| t0087815 | 21 | 1 TGTA AACATACTACACTCTCA       | miRNA | miR-30c    |
| t0087913 | 26 | 1 TGTA AACATCCTACACTCTCCGCATC  | miRNA | miR-30c    |

|          |    |                                  |       |             |
|----------|----|----------------------------------|-------|-------------|
| t0089684 | 24 | 1 TGTAGACATCCTACACTCTCAGCT       | miRNA | miR-30c     |
| t0092150 | 23 | 1 TTTCGGTCGGATGTTTACAGTTC        | miRNA | miR-30b-3p  |
| t0092361 | 20 | 1 TTCAGTCGGATGTTTAGAGA           | miRNA | miR-30b-3p  |
| t0044936 | 23 | 1 TTTTCAGTCGGATGTTTACGGTA        | miRNA | miR-30b-3p  |
| t0047459 | 23 | 1 TTTCAGACGGATGTTTACAGTTC        | miRNA | miR-30b-3p  |
| t0052436 | 20 | 1 CTTTAAGTCGGATGTTTATA           | miRNA | miR-30b-3p  |
| t0055270 | 21 | 1 TTTCAGTCGGATATTTACAGT          | miRNA | miR-30b-3p  |
| t0060445 | 24 | 1 CTTTCAGTCGGATGTTTGCAGATC       | miRNA | miR-30b-3p  |
| t0063487 | 21 | 1 CTTTCAGTCGGATGTTTAAAG          | miRNA | miR-30b-3p  |
| t0063982 | 20 | 1 CTGGGAGGAGGATGTTTACT           | miRNA | miR-30b*    |
| t0066027 | 20 | 1 CTGGGAGGGGGATGTTTACT           | miRNA | miR-30b*    |
| t0073686 | 32 | 1 TGTA AACATCCTACACTCAGCTAGACATG | miRNA | miR-30b     |
| t0080667 | 22 | 1 TGTA AACATCCTACACTAAGCT        | miRNA | miR-30b     |
| t0085674 | 22 | 1 TGTA AACATCCTACACTCAGCA        | miRNA | miR-30b     |
| t0052252 | 22 | 1 TGAAAACATCCTACACTCAGCT         | miRNA | miR-30b     |
| t0054609 | 22 | 1 TGTA AACATCTTACACTCAGCG        | miRNA | miR-30b     |
| t0062114 | 22 | 1 TGTA AACATCCTACACTCAGCC        | miRNA | miR-30b     |
| t0064713 | 22 | 1 TGTA AACATCCTACACACAGCT        | miRNA | miR-30b     |
| t0069683 | 22 | 1 TCTAAACATCCTACACTCAGCT         | miRNA | miR-30b     |
| t0069790 | 22 | 1 TGTA AACATCCTACACTCAGAT        | miRNA | miR-30b     |
| t0087226 | 32 | 1 TGTA AACATCCTACACTCAGCTAGACATG | miRNA | miR-30b     |
| t0089821 | 22 | 1 TGTA AACATCCTACACTCCGCT        | miRNA | miR-30b     |
| t0046961 | 26 | 1 TGTA AACATCCTCGACTAGAAGCATC    | miRNA | miR-30a-5p  |
| t0056115 | 26 | 1 TGTA AACATCCCCGACTGGACGCATC    | miRNA | miR-30a-5p  |
| t0041954 | 26 | 1 TGTA AACATCCTCGACTGGACGCATC    | miRNA | miR-30a-5p  |
| t0062423 | 26 | 1 TGTA AACATCCCCGACTGGAAGAATC    | miRNA | miR-30a-5p  |
| t0065170 | 26 | 1 TGTA AACATCCTCGACTGGAAGCATC    | miRNA | miR-30a-5p  |
| t0066807 | 26 | 1 TGTA AACATCCCCGACTGGATGCATC    | miRNA | miR-30a-5p  |
| t0072464 | 26 | 1 TGTA AACATCCTCGACTGGAAGCGTC    | miRNA | miR-30a-5p  |
| t0077192 | 26 | 1 TGTA AACATCCTCGACTGGAAGCATT    | miRNA | miR-30a-5p  |
| t0077708 | 26 | 1 TGTA AACATCCTCGACTGGAAGCATC    | miRNA | miR-30a-5p  |
| t0084323 | 21 | 1 GTA AACATCCTCGACTGGAAG         | miRNA | miR-30a-5p  |
| t0092587 | 26 | 1 TGTA AACATCCCCGTCTGGAAGCATC    | miRNA | miR-30a-5p  |
| t0092747 | 26 | 1 TATA AACATCCTCGACTGGAAGCATC    | miRNA | miR-30a-5p  |
| t0092917 | 26 | 1 TGTA AAGCATCCTCGACTGGAAGCATC   | miRNA | miR-30a-5p  |
| t0042293 | 26 | 1 TGTA AACATCCTCGGCTGGAAGCATC    | miRNA | miR-30a-5p  |
| t0044784 | 26 | 1 TGTA AACATCCTCGACTGGAAGCATG    | miRNA | miR-30a-5p  |
| t0045252 | 26 | 1 TGTA AACATCCTCGACTGGAAGCCTC    | miRNA | miR-30a-5p  |
| t0046830 | 25 | 1 CTTTCAGTCGGATGTTTGCAGCCTC      | miRNA | miR-30a*    |
| t0051463 | 25 | 1 ATTTTCAGTCGGATGTTTGCAGCATC     | miRNA | miR-30a*    |
| t0051723 | 21 | 1 TTTCAGTCGGATGTTTGCAGT          | miRNA | miR-30a*    |
| t0064226 | 22 | 1 TGTA AACATCCTGACTGGATC         | miRNA | miR-30a     |
| t0064496 | 22 | 1 TGTA AACATCCTCGACTGGATA        | miRNA | miR-30a     |
| t0077530 | 22 | 1 GGTA AACATCCTCGACTGGATC        | miRNA | miR-30a     |
| t0079230 | 20 | 1 TGTA AACTGGTATGCTCTCA          | miRNA | miR-3048    |
| t0080657 | 21 | 1 GCCTGTAAACTGGCATGCTCT          | miRNA | miR-3048    |
| t0080713 | 21 | 1 CTGTAAACTGGTATGCTCTCT          | miRNA | miR-3048    |
| t0086140 | 22 | 1 CTGTAAACTGGTATGCTCTCTA         | miRNA | miR-3048    |
| t0087326 | 23 | 1 CAGTGCAATAGAATTGTCAAAGC        | miRNA | miR-301b-3p |
| t0090915 | 24 | 1 CAGTGCAATAGTATTGTCTAAGCA       | miRNA | miR-301b-3p |
| t0091723 | 22 | 1 TATCACAGTTCTGCTTAGGTGA         | miRNA | miR-2d-3p   |
| t0047435 | 24 | 1 ACCCTTGTTTCGACTGTGCTGTTTT      | miRNA | miR-2c-5p   |
| t0086821 | 24 | 1 ACCCTTGTTTCGACTGTGATGTTTT      | miRNA | miR-2c-5p   |
| t0092850 | 22 | 1 TATCACAGCCCTGCTTGGGACA         | miRNA | miR-2b      |
| t0059392 | 22 | 1 TAGCATTATCTGAAATCGGGTT         | miRNA | miR-29e     |
| t0073497 | 21 | 1 TAGCATTATCTGAAATCGGGT          | miRNA | miR-29e     |
| t0089252 | 22 | 1 TAGCACCATCTGAAATCGGTAC         | miRNA | miR-29d     |
| t0047319 | 22 | 1 CTAGCAACATCTGAAATCGGTT         | miRNA | miR-29d     |

|          |    |                               |       |             |
|----------|----|-------------------------------|-------|-------------|
| t0074032 | 23 | 1 TAGCACCATCTGAAATCGGTATC     | miRNA | miR-29d     |
| t0076750 | 21 | 1 TAGCACCATTTGAAATCGGTT       | miRNA | miR-29c     |
| t0080086 | 22 | 1 TAGCACCATCTGAAATCGGGTA      | miRNA | miR-29c     |
| t0061914 | 22 | 1 TAGCACCATTTGAAATCTGGTA      | miRNA | miR-29c     |
| t0081635 | 22 | 1 TAGCACCATCTGAAATCTGTTA      | miRNA | miR-29c     |
| t0062750 | 22 | 1 CAGCACCATTTGAAATCGGTTA      | miRNA | miR-29c     |
| t0059032 | 22 | 1 TACCACCATCTGAAATCGGTTA      | miRNA | miR-29c     |
| t0066875 | 22 | 1 TAGCACCATCTGAAATAGGTTA      | miRNA | miR-29c     |
| t0055478 | 22 | 1 TAGCACCATTTGAAACCGGTTA      | miRNA | miR-29c     |
| t0063993 | 21 | 1 TAGCACCCTTTGAAATCGGTT       | miRNA | miR-29c     |
| t0084811 | 22 | 1 TAGCAAAATTTGAAATCGGTTA      | miRNA | miR-29c     |
| t0071953 | 24 | 1 TAGCACCATCTGAAATCGGTTATC    | miRNA | miR-29c     |
| t0077789 | 22 | 1 TAGCACCATTTGAAATCGGGTA      | miRNA | miR-29c     |
| t0088751 | 21 | 1 TAGCCCCATTTGAAATCGGTT       | miRNA | miR-29c     |
| t0041116 | 22 | 1 CAGCACCATCTGAAATCGGTTA      | miRNA | miR-29c     |
| t0042021 | 21 | 1 TAGCACCATTTGAAATAAGTG       | miRNA | miR-29b     |
| t0050174 | 21 | 1 CGCGGGGCGGGGGCGGGGCGG       | miRNA | miR-2981    |
| t0050334 | 31 | 1 CCGCGCGCGGGTCGGGGGGCGGGGCGG | miRNA | miR-2981    |
| t0050561 | 26 | 1 CGCGGGTCGGGGGGTGGGGCGGACTG  | miRNA | miR-2981    |
| t0060390 | 23 | 1 CGCGGGTCGAGGGGCGGGGCGGA     | miRNA | miR-2981    |
| t0063764 | 23 | 1 CGCGGGGCGGGGGCGGGGCGGA      | miRNA | miR-2981    |
| t0068001 | 24 | 1 GCGCGGGACGGGGGGAGGGGCGGA    | miRNA | miR-2981    |
| t0072894 | 20 | 1 GCGCGCGGGGCGGGGGCGG         | miRNA | miR-2981    |
| t0085093 | 23 | 1 CGCGGGTCGGGGGGAGGGGCGGA     | miRNA | miR-2981    |
| t0086230 | 22 | 1 CGGGTCGGGGGGCGGGGAGGAC      | miRNA | miR-2981    |
| t0086777 | 27 | 1 CGCGGGTCGGGGGGCGGGGAGGACTGT | miRNA | miR-2981    |
| t0090121 | 21 | 1 CGCGGGACGGGGGGCGGGGCGG      | miRNA | miR-2981    |
| t0093142 | 31 | 1 CGCGCGCGGGTCGGGGGGCGGGGAGGA | miRNA | miR-2981    |
| t0048609 | 31 | 1 CCGCGCGCGGGTCGGGGGGAGGGGCGG | miRNA | miR-2981    |
| t0049842 | 31 | 1 CGCGCGCGGGTCGGGGGGAGGGGCGGA | miRNA | miR-2981    |
| t0053968 | 23 | 1 GCGGGTCGGGGGGCGGGGCGGCC     | miRNA | miR-2981    |
| t0054411 | 27 | 1 CGCGGGGCGGGGGCGGGGCGGACTGT  | miRNA | miR-2981    |
| t0055092 | 21 | 1 CGCGGGTCGGGGGGAGGGGCGG      | miRNA | miR-2981    |
| t0059672 | 23 | 1 GAGGGTTGGGTGGAGGCTCTCTC     | miRNA | miR-296-3p  |
| t0059815 | 23 | 1 GAGGGTTGGGTGGAGGTTCTATC     | miRNA | miR-296-3p  |
| t0061176 | 23 | 1 GAGGGGTGGGTGGAGGCTCTATC     | miRNA | miR-296-3p  |
| t0061304 | 19 | 1 AGGGGGCGGGGCGGACTGT         | miRNA | miR-2885    |
| t0070518 | 24 | 1 CGGCGGGCGGCGGGGCGGGGCGGT    | miRNA | miR-2885    |
| t0071994 | 18 | 1 CGGCGGGCGGCGGGGCGG          | miRNA | miR-2885    |
| t0073054 | 19 | 1 GGGGGGCGGGACGACTGT          | miRNA | miR-2885    |
| t0075935 | 21 | 1 GCGGCGGCGGTCGGCGGGGGG       | miRNA | miR-2885    |
| t0076991 | 19 | 1 GGGGGGCGGGGCGGACTGG         | miRNA | miR-2885    |
| t0077526 | 23 | 1 CGGTCGGCGGGGGCGGGGCGGG      | miRNA | miR-2885    |
| t0085270 | 23 | 1 CGGCGGGCGGCGGGGCGGGGCGG     | miRNA | miR-2885    |
| t0088832 | 23 | 1 AAGGAGCTCACAGTCTATTGATC     | miRNA | miR-28-5p   |
| t0089506 | 24 | 1 ACTAGATTGTGAGCTCCTGGAGAT    | miRNA | miR-28-3p   |
| t0070406 | 24 | 1 TTCACAGTGGCTAAATTGTGCATC    | miRNA | miR-27b     |
| t0072269 | 24 | 1 TTCACAGTGGCTAAGTTCTGAATC    | miRNA | miR-27a-3p  |
| t0083351 | 24 | 1 TTCACAGTGGCTAAGTTCTGCATT    | miRNA | miR-27a-3p  |
| t0043214 | 24 | 1 TTCACAGTGGCTAAGTTCCGCATC    | miRNA | miR-27a-3p  |
| t0044797 | 21 | 1 GATGCGTATCGTTTAGTCAAT       | miRNA | miR-279d*   |
| t0059213 | 20 | 1 GATGCGTATCGTTTAGTCAA        | miRNA | miR-279d*   |
| t0068874 | 22 | 1 CGACTAGATATACTCATCCA        | miRNA | miR-279b    |
| t0074401 | 20 | 1 TGATCCGACTCGAAGGACCA        | miRNA | miR-2779    |
| t0079005 | 21 | 1 TAAATGCATTTTCTGGCCCGT       | miRNA | miR-277     |
| t0086255 | 24 | 1 TAGGAACTTCATACCGTGGTCATC    | miRNA | miR-276a-3p |
| t0086969 | 27 | 1 TGGTAAACCCGAACCACCGTTGGCATC | miRNA | miR-2765    |
| t0066748 | 27 | 1 TGGTAACTCAGAACCACCGTTGGCATC | miRNA | miR-2765    |

|          |    |                               |       |          |
|----------|----|-------------------------------|-------|----------|
| t0090919 | 27 | 1 TGGTAAATCCGAACCACCGTTGGCATC | miRNA | miR-2765 |
| t0091120 | 27 | 1 TGGTAACTCCGAACCACCGTTGACATC | miRNA | miR-2765 |
| t0053281 | 20 | 1 GCGCGATGTAACCAAGTGGA        | miRNA | miR-270  |
| t0063000 | 20 | 1 GCGCGATGTCGCCAAGTGGA        | miRNA | miR-270  |
| t0074604 | 20 | 1 GCGCGATGTAGCCAATTGGA        | miRNA | miR-270  |
| t0061374 | 20 | 1 GCGCGATGTAGCTAAGTGGA        | miRNA | miR-270  |
| t0065637 | 20 | 1 GCGCGATGAAGCCAAGTGGA        | miRNA | miR-270  |
| t0045635 | 23 | 1 GCGCGATGTAGCCAAGTGGAGCC     | miRNA | miR-270  |
| t0056798 | 23 | 1 GGAGGATGTAGCCAAGTGGATTA     | miRNA | miR-270  |
| t0050711 | 20 | 1 GCGCGATGTAGCCAAGTGAA        | miRNA | miR-270  |
| t0050643 | 20 | 1 GCGCGATGTAGCAAAGTGGA        | miRNA | miR-270  |
| t0047648 | 20 | 1 GCGCGATGGAGCCAAGTGGA        | miRNA | miR-270  |
| t0064500 | 22 | 1 TTTAAGTAATTCAGGATAGGTT      | miRNA | miR-26b  |
| t0067271 | 22 | 1 TTCAAGTAATTCAGGATAGCTT      | miRNA | miR-26b  |
| t0084856 | 22 | 1 TTCAAGTAATTCAGGATAGGTT      | miRNA | miR-26b  |
| t0046444 | 21 | 1 TTCAAGTAATTAAGGATAGGT       | miRNA | miR-26b  |
| t0046921 | 22 | 1 TTCAAGTGATTCAGGATAGGTT      | miRNA | miR-26b  |
| t0050700 | 21 | 1 TTCAAGTAATTCAGGTTAGGT       | miRNA | miR-26b  |
| t0054426 | 21 | 1 TTCAAGTAGTTCAGGATAGGT       | miRNA | miR-26b  |
| t0070424 | 21 | 1 TTCTAGTAATTCAGGATAGGT       | miRNA | miR-26b  |
| t0071708 | 22 | 1 TTCAAGTAATTTAGGATAGGTA      | miRNA | miR-26b  |
| t0073007 | 21 | 1 TTTAAGTGATTCAGGATAGGT       | miRNA | miR-26b  |
| t0083891 | 22 | 1 TTCATGTAATTCAGGATAGGTT      | miRNA | miR-26b  |
| t0089080 | 22 | 1 TTCAAGTAAATCAGGATAGGTT      | miRNA | miR-26b  |
| t0092181 | 21 | 1 TTCAAGTAAGTCAGGATAGGT       | miRNA | miR-26b  |
| t0042200 | 21 | 1 ATCAAGTAATTCAGGATAGGT       | miRNA | miR-26b  |
| t0042262 | 20 | 1 TTCAAGTAATTCAGAATAGG        | miRNA | miR-26b  |
| t0043198 | 24 | 1 TTCAAGTAATTCAGGATCGGTTGA    | miRNA | miR-26b  |
| t0044353 | 22 | 1 TTCAAGGAATTCAGGATAGGTA      | miRNA | miR-26b  |
| t0046476 | 23 | 1 CTCAAGTAATTCAGGATAGGTTA     | miRNA | miR-26b  |
| t0048225 | 22 | 1 TTCAAGTAATTGAGGATAGGTA      | miRNA | miR-26b  |
| t0048901 | 22 | 1 TTCAGGTAATTCAGGATAGGTT      | miRNA | miR-26b  |
| t0049245 | 22 | 1 TTCAAGTACTTCAGGATAGGTT      | miRNA | miR-26b  |
| t0052863 | 21 | 1 CTCAAGTAATTCAGGATAGGT       | miRNA | miR-26b  |
| t0053021 | 22 | 1 TTCAAGTAATTCAGGATAGGCC      | miRNA | miR-26b  |
| t0054104 | 21 | 1 TTCCAGTAATTCAGGATAGGT       | miRNA | miR-26b  |
| t0055177 | 22 | 1 TTCAAGTAATCCAGGATAGGTA      | miRNA | miR-26b  |
| t0055756 | 21 | 1 TTAAAGTAATTCAGGATAGGT       | miRNA | miR-26b  |
| t0056203 | 22 | 1 TCCAAGTAATTCAGGATAGGTT      | miRNA | miR-26b  |
| t0057308 | 21 | 1 TTCATGTAATTCAGGATAGGT       | miRNA | miR-26b  |
| t0057714 | 22 | 1 TTCAAGTAATTCAGGATATGTT      | miRNA | miR-26b  |
| t0058125 | 20 | 1 TTCAAGTAATTAAGGATAGG        | miRNA | miR-26b  |
| t0058140 | 22 | 1 TTCAAGTAATTCATGATAGGTT      | miRNA | miR-26b  |
| t0063745 | 21 | 1 TTCAAGTAATTCAGCATAGGT       | miRNA | miR-26b  |
| t0064611 | 23 | 1 TTCAAGTAATTCAGGAGAGGTTA     | miRNA | miR-26b  |
| t0067073 | 21 | 1 TTCAAGTAATTCAGGATGGGT       | miRNA | miR-26b  |
| t0067391 | 21 | 1 TTGAAGTAATTCAGGATAGGT       | miRNA | miR-26b  |
| t0070526 | 22 | 1 TTCAAGTAACTCAGGATAGGTT      | miRNA | miR-26b  |
| t0070913 | 21 | 1 TTTAAGTAATTCAGGATAGGT       | miRNA | miR-26b  |
| t0071029 | 23 | 1 TTCAAGTAATTCAGGATGGGTTT     | miRNA | miR-26b  |
| t0072384 | 24 | 1 CTCAAGTAATTCAGGATAGGTAGA    | miRNA | miR-26b  |
| t0073369 | 21 | 1 TTCGAGTAATTCAGGATAGGT       | miRNA | miR-26b  |
| t0074512 | 22 | 1 TTCAAGTAATTTAGGATAGGTT      | miRNA | miR-26b  |
| t0075170 | 21 | 1 TTCAAGTAATTTAGGATAGGT       | miRNA | miR-26b  |
| t0078149 | 21 | 1 TTCACGTAATTCAGGATAGGT       | miRNA | miR-26b  |
| t0079096 | 22 | 1 TTCAAGTAATTCAGGATAGGAA      | miRNA | miR-26b  |
| t0079469 | 22 | 1 TCAAGGAATTCAGGATAGGTTG      | miRNA | miR-26b  |
| t0080679 | 22 | 1 TTCAAGTAACCTAGGATAGGCT      | miRNA | miR-26a  |

|          |    |                             |       |         |
|----------|----|-----------------------------|-------|---------|
| t0081001 | 22 | 1 TTCAAGTAATCCAGGATAAGCA    | miRNA | miR-26a |
| t0082338 | 23 | 1 TTCAAGGAATCCAGGATAGGCTT   | miRNA | miR-26a |
| t0083290 | 20 | 1 TTCAAGTAATCCCGGATAGG      | miRNA | miR-26a |
| t0083387 | 24 | 1 TTCAAGTAATCCAGGACAGGCTAG  | miRNA | miR-26a |
| t0084051 | 20 | 1 TTCAAATAATCCAGGATAGG      | miRNA | miR-26a |
| t0084340 | 21 | 1 TCAAGTGATCCAGGATAGGCT     | miRNA | miR-26a |
| t0085610 | 21 | 1 TTCAAGTAATCCGGGATAGGC     | miRNA | miR-26a |
| t0085834 | 22 | 1 TTCAAGTACTCCAGGATCGGCT    | miRNA | miR-26a |
| t0086756 | 20 | 1 AAGTAATCCAGGATAGGCTT      | miRNA | miR-26a |
| t0086785 | 22 | 1 TTCGAGTAATCCAGGATAGGCG    | miRNA | miR-26a |
| t0088007 | 21 | 1 TCAAGTAATCCACGATAGGCT     | miRNA | miR-26a |
| t0091756 | 20 | 1 TTCAAGTAATACAGGATAGG      | miRNA | miR-26a |
| t0043610 | 22 | 1 TTCAGGTAATCCAGGATAGGCA    | miRNA | miR-26a |
| t0045274 | 22 | 1 TTCAAGTAATCCAGGATCGGAT    | miRNA | miR-26a |
| t0046040 | 22 | 1 TCAAGTAATCCAGGATAGGTTG    | miRNA | miR-26a |
| t0046099 | 21 | 1 TTCAAGTAGTCCAGGATAGGC     | miRNA | miR-26a |
| t0046488 | 22 | 1 TTCAAGAAATCTAGGATAGGCT    | miRNA | miR-26a |
| t0048834 | 20 | 1 TTCAAGGAATCCAGGATAGG      | miRNA | miR-26a |
| t0049145 | 22 | 1 TTCAAGTATTCCAGGATAGGCT    | miRNA | miR-26a |
| t0052769 | 21 | 1 TTCAAGTAATCCCGGATAGGC     | miRNA | miR-26a |
| t0054870 | 21 | 1 TTCAAGTAACCCAGGATAGGC     | miRNA | miR-26a |
| t0056216 | 22 | 1 TTCAAGTAATCCTGGATAGGCA    | miRNA | miR-26a |
| t0056494 | 25 | 1 TTCAAGTAATCCAGGATCGGCTAGA | miRNA | miR-26a |
| t0057275 | 23 | 1 TTCAAGTAATACAGGATAGGCTA   | miRNA | miR-26a |
| t0058236 | 21 | 1 TTCAAGTAATCCAAGATAGGC     | miRNA | miR-26a |
| t0058629 | 22 | 1 TTCAAGTAGTCCAGGATAGGCA    | miRNA | miR-26a |
| t0058736 | 22 | 1 TTCAAGTAATCCACGATAGGCT    | miRNA | miR-26a |
| t0058823 | 22 | 1 TTCAAGAAATCCAGGATAGGCA    | miRNA | miR-26a |
| t0059348 | 23 | 1 TTCGAGTAATCCAGGATAGGATC   | miRNA | miR-26a |
| t0059374 | 22 | 1 GTCAAGTAATCCAGGATAGGCT    | miRNA | miR-26a |
| t0060123 | 23 | 1 CTTCAAGTAATCCAGGATCGGCT   | miRNA | miR-26a |
| t0061197 | 21 | 1 TTCAAGTAATCCAGGATTGGC     | miRNA | miR-26a |
| t0061762 | 20 | 1 TTCAAGTAATCCAGGATCGG      | miRNA | miR-26a |
| t0062425 | 23 | 1 TTCAAGTAATCCAGGATAGGAAT   | miRNA | miR-26a |
| t0063333 | 20 | 1 TTCAAGTAATCCAGAATAGG      | miRNA | miR-26a |
| t0064346 | 22 | 1 TTCAAGTAATCCAGGAGAGGCT    | miRNA | miR-26a |
| t0065126 | 22 | 1 TTCAAGTCATCCAGGATAGGCT    | miRNA | miR-26a |
| t0066465 | 21 | 1 TTTAAGTAATCCAGGATAGGC     | miRNA | miR-26a |
| t0067037 | 19 | 1 AAGTAATACAGGATAGGCT       | miRNA | miR-26a |
| t0067262 | 22 | 1 ATCAAGTAATCCAGGATAGGCT    | miRNA | miR-26a |
| t0067570 | 21 | 1 TCAAGTAATCTAGGATAGGCT     | miRNA | miR-26a |
| t0069317 | 23 | 1 TTCAAGTAATCTGGGATAGGCTT   | miRNA | miR-26a |
| t0069398 | 22 | 1 TTCAAGTAATCCAGGAGAGGCA    | miRNA | miR-26a |
| t0069711 | 22 | 1 TTCAAGTAATCCAGGCTAGGCT    | miRNA | miR-26a |
| t0071447 | 21 | 1 TTCAAGTAATCCAGGGTAGGC     | miRNA | miR-26a |
| t0073915 | 23 | 1 TTCAAGTAATCCAGGATAGGCCA   | miRNA | miR-26a |
| t0077229 | 21 | 1 CTCAAGTAATCCAGGATAGGC     | miRNA | miR-26a |
| t0077986 | 22 | 1 TTCAAGTAATCAAGGATAGGCA    | miRNA | miR-26a |
| t0078243 | 22 | 1 CTCAAGTAATCCAGGATAGGCA    | miRNA | miR-26a |
| t0078873 | 22 | 1 TTCAAGTAATCCAGGATAGGGA    | miRNA | miR-26a |
| t0079034 | 24 | 1 TTCAAGTAATCCAGGATAGACTAA  | miRNA | miR-26a |
| t0080705 | 22 | 1 TGCAAGTAATCCAGGATAGGCT    | miRNA | miR-26a |
| t0081791 | 22 | 1 TTCAAGGAATCCAGGATAGCCT    | miRNA | miR-26a |
| t0082583 | 25 | 1 TTCAAGTAATCCAGGATAGGCTATA | miRNA | miR-26a |
| t0083123 | 22 | 1 TTCAAGTAAACCAGGATAGGCT    | miRNA | miR-26a |
| t0083595 | 22 | 1 TTCACGTAATCCAGGATAGGCT    | miRNA | miR-26a |
| t0084047 | 22 | 1 TTCAACTAATCCAGGATAGGCT    | miRNA | miR-26a |
| t0084853 | 20 | 1 TTCAAGTAATCCAGGAAAGG      | miRNA | miR-26a |

|          |    |                                  |       |             |
|----------|----|----------------------------------|-------|-------------|
| t0085351 | 22 | 1 TTCAAGTAATCCAGGATAGACT         | miRNA | miR-26a     |
| t0085822 | 22 | 1 TTCAAGTAATCCAGGATCGGCC         | miRNA | miR-26a     |
| t0085916 | 22 | 1 TTCAAGTAATCGAGGATAGGCT         | miRNA | miR-26a     |
| t0085926 | 24 | 1 TGAGGTAGGAGGGTGTGTGGTTAG       | miRNA | miR-265     |
| t0086119 | 20 | 1 TGAGGGAGGAGGTTGTGTGG           | miRNA | miR-265     |
| t0086345 | 22 | 1 TGAGGGAGGAGGGTGTGTGGTA         | miRNA | miR-265     |
| t0086520 | 20 | 1 TGAGGGAGGAGGTTGTGTAG           | miRNA | miR-265     |
| t0086786 | 21 | 1 TGAGGGAGGAGGTTGTGTAGT          | miRNA | miR-265     |
| t0086891 | 20 | 1 TGAGGGAGGAGGGTGTATAG           | miRNA | miR-265     |
| t0087246 | 21 | 1 TGAGGGAGGAGGATGTGTCTGT         | miRNA | miR-265     |
| t0087329 | 22 | 1 TGAGGGAGGAGGGTGTATAGTT         | miRNA | miR-265     |
| t0087798 | 25 | 1 TGAGGGAGGAGGTTGTGTGGTTATA      | miRNA | miR-265     |
| t0089929 | 25 | 1 AATGGCACTGGAAGAATTCACGGTC      | miRNA | miR-263a-5p |
| t0091457 | 24 | 1 TTAAGTAGTAGTCCGGAGAGATC        | miRNA | miR-252b    |
| t0092107 | 24 | 1 TTAAGTAGTAGGGCCGTAGAGATC       | miRNA | miR-252b    |
| t0092805 | 23 | 1 AGGCGGCGACTTGGGCAATTGCT        | miRNA | miR-25*     |
| t0042771 | 23 | 1 AGGCGAGACTTGGGCAATTGCT         | miRNA | miR-25*     |
| t0055711 | 21 | 1 AAGCGGAGACTTGGGCAATTG          | miRNA | miR-25*     |
| t0061463 | 23 | 1 AGACGGAGACTTGGGCAATTGCT        | miRNA | miR-25*     |
| t0067332 | 21 | 1 AGGCGGCGACTTGGGCAATTG          | miRNA | miR-25*     |
| t0071157 | 23 | 1 AGGAGGAGACTTGGGCAATTGCT        | miRNA | miR-25*     |
| t0080870 | 21 | 1 AGGCGCAGACTTGGGCAATTG          | miRNA | miR-25*     |
| t0083003 | 20 | 1 AGGCGGAGACTTAGGCAATT           | miRNA | miR-25*     |
| t0086994 | 23 | 1 AGGAGGAGAATTGGGCAATTGAT        | miRNA | miR-25*     |
| t0090428 | 21 | 1 AGGCGGAGCCTTGGGCAATTG          | miRNA | miR-25*     |
| t0050569 | 21 | 1 GGGCGGAGACTTGGGCAATTG          | miRNA | miR-25*     |
| t0049259 | 21 | 1 AGGCGAAGACTTGGGCAATTG          | miRNA | miR-25*     |
| t0066286 | 21 | 1 AGGCGGAGAATTGGGCAATTG          | miRNA | miR-25*     |
| t0043563 | 21 | 1 AGGCGGAACTTGGGCAATTG           | miRNA | miR-25*     |
| t0044519 | 21 | 1 AGGGGGAGACTTGGGCAATTG          | miRNA | miR-25*     |
| t0044589 | 23 | 1 AGGCGGAGACTTGGGGAATTGCT        | miRNA | miR-25*     |
| t0045266 | 21 | 1 AGGCGGAGACTTGGGTAATTG          | miRNA | miR-25*     |
| t0045840 | 23 | 1 AGGCGGAGACTTTGGCAATTGCT        | miRNA | miR-25*     |
| t0047074 | 21 | 1 AGGCGAGACTTGGGCAATTG           | miRNA | miR-25*     |
| t0050620 | 23 | 1 AGGCGGAGGCTTGGGCAATTGCT        | miRNA | miR-25*     |
| t0052029 | 21 | 1 AGCCGGAGACTTGGGCAATTG          | miRNA | miR-25*     |
| t0060218 | 23 | 1 AGGCGGAGACTTGGGCAATTTCT        | miRNA | miR-25*     |
| t0060736 | 20 | 1 AGGCGGAGGCTTGGGCAATT           | miRNA | miR-25*     |
| t0061071 | 23 | 1 AGGCGGAGACTCGGGCAATTGCT        | miRNA | miR-25*     |
| t0063589 | 22 | 1 AGGCGGAGCCTTGGGCAATTGA         | miRNA | miR-25*     |
| t0065403 | 22 | 1 AGGAGGAGACTTGGGCAATTGA         | miRNA | miR-25*     |
| t0065944 | 21 | 1 AGGCGGGGACTTGGGCAATTG          | miRNA | miR-25*     |
| t0066219 | 21 | 1 AGGCGAAGGCTTGGGCAATTG          | miRNA | miR-25*     |
| t0067469 | 22 | 1 CATTGCACTTGA CT CGGTATGA       | miRNA | miR-25      |
| t0068221 | 21 | 1 CATTGCAATTGTATCGGTCTG          | miRNA | miR-25      |
| t0074300 | 22 | 1 CATTGCAATTGTCTCGGTGTGA         | miRNA | miR-25      |
| t0075440 | 22 | 1 AATTGCACTTGTCTCGGTCTGT         | miRNA | miR-25      |
| t0076771 | 27 | 1 CATTGCACTTGTCTCGGTCTGGCGGGA    | miRNA | miR-25      |
| t0077673 | 19 | 1 CATTGCGCTTGTCTCGGTC            | miRNA | miR-25      |
| t0078712 | 22 | 1 TATTGCACTTGTCTCGGTCTGC         | miRNA | miR-25      |
| t0080462 | 21 | 1 CATTACACTTGTCTCGGTTTG          | miRNA | miR-25      |
| t0087131 | 27 | 1 CCTTGCACTTGTCTCGGTCTGGCGGGC    | miRNA | miR-25      |
| t0089546 | 23 | 1 CATTGCACTTGTCTCGGGCTGTA        | miRNA | miR-25      |
| t0090147 | 22 | 1 CCTTGCACTTGTCTCGGCCTGA         | miRNA | miR-25      |
| t0091840 | 19 | 1 GATTGCACTTGTCTCGGTC            | miRNA | miR-25      |
| t0092282 | 27 | 1 CATTGCACTTGCCTCGGTCTGAAGTAG    | miRNA | miR-25      |
| t0040945 | 35 | 1 CATTGCACTTGTCTCGGCCTGAATACTCTC | miRNA | miR-25      |
| t0041015 | 22 | 1 CATTGCACCTGTCTCGGTCTGT         | miRNA | miR-25      |



|          |    |                             |       |        |
|----------|----|-----------------------------|-------|--------|
| t0041265 | 21 | 1 CATTGCAGTTGTCTCGGGCTG     | miRNA | miR-25 |
| t0041578 | 20 | 1 CATTGCCCTTGTCTCGGTCT      | miRNA | miR-25 |
| t0042542 | 22 | 1 CATTGTA CTTGTCTCGGTCTTA   | miRNA | miR-25 |
| t0042561 | 22 | 1 CATTGCACTTGTATCGGTCTGT    | miRNA | miR-25 |
| t0042935 | 21 | 1 CATTGCACTTGTCTCGTTCTG     | miRNA | miR-25 |
| t0044272 | 22 | 1 CATTGCATTTGTTTCGGTCTGA    | miRNA | miR-25 |
| t0044884 | 22 | 1 CATTGCACTTCTCTCGGTCTGT    | miRNA | miR-25 |
| t0045283 | 21 | 1 CATTGCACTTGTCTAGGTATG     | miRNA | miR-25 |
| t0045420 | 22 | 1 CATTGAATTTGTCTCGGTCTGA    | miRNA | miR-25 |
| t0045803 | 22 | 1 CAATCCACTTGTCTCGGTCTGA    | miRNA | miR-25 |
| t0046700 | 23 | 1 CATTGCACTTGTCCC GG TCTGAA | miRNA | miR-25 |
| t0046843 | 19 | 1 CATTGTA CTTGTCTCGGTCT     | miRNA | miR-25 |
| t0048094 | 21 | 1 CATTGCTCTTGTCTCGGTCTG     | miRNA | miR-25 |
| t0048925 | 20 | 1 ATTGCACTTGTCTCAGTCTG      | miRNA | miR-25 |
| t0049611 | 19 | 1 CATTGCACTTATCTCGGTCT      | miRNA | miR-25 |
| t0050414 | 22 | 1 CATTGCACTTGTCTCGGTCTTC    | miRNA | miR-25 |
| t0050912 | 21 | 1 ATTGCACTTGTATCGGTCTGA     | miRNA | miR-25 |
| t0051114 | 19 | 1 CACTGCACTTGTCTCGGTCT      | miRNA | miR-25 |
| t0052070 | 21 | 1 CATTGCACTTGCCTCGGTCTT     | miRNA | miR-25 |
| t0053127 | 22 | 1 CATTGCACTTGTCTCGGTGTGT    | miRNA | miR-25 |
| t0053311 | 21 | 1 CATTGCACTGGTCTCGGTCTG     | miRNA | miR-25 |
| t0053529 | 21 | 1 CATTATACTTGTCTCGGTCTG     | miRNA | miR-25 |
| t0053597 | 22 | 1 CATTGCACTTGTCTCGGTCTG     | miRNA | miR-25 |
| t0053628 | 22 | 1 CATTGCTCTTGTCTCGGTCTGT    | miRNA | miR-25 |
| t0053693 | 21 | 1 CATTGCACTTGA CTAGGTCTG    | miRNA | miR-25 |
| t0053800 | 22 | 1 CATTGCCCTTGTCTCGGGCTGA    | miRNA | miR-25 |
| t0054164 | 21 | 1 CATTGCACGTGTCTCGGTCTG     | miRNA | miR-25 |
| t0054427 | 23 | 1 CATTGCACTTGTCTCGGTCTGCT   | miRNA | miR-25 |
| t0055652 | 23 | 1 CATTGCACTTGTCTCGGTCTGAA   | miRNA | miR-25 |
| t0055782 | 23 | 1 CATCGCACTTGTCTCGGTCTGAA   | miRNA | miR-25 |
| t0056298 | 21 | 1 ATTGCACTTGTCTCGGGCTGA     | miRNA | miR-25 |
| t0056902 | 20 | 1 CATTGCACTAGTCTCGGTCT      | miRNA | miR-25 |
| t0057234 | 21 | 1 CATTGTA CTTGTCTCGGTATG    | miRNA | miR-25 |
| t0057295 | 22 | 1 CATTGCGCTTGTCTCGGGCTGA    | miRNA | miR-25 |
| t0057453 | 22 | 1 CATTGCAATTGTCTCGGGCTGA    | miRNA | miR-25 |
| t0057561 | 19 | 1 CTTTGCCTTGTCTCGGTCT       | miRNA | miR-25 |
| t0057650 | 21 | 1 CATTGTA CTTGTCCC GG TCTG  | miRNA | miR-25 |
| t0057943 | 23 | 1 CATTGCACTTGTCTCGGGCTGAT   | miRNA | miR-25 |
| t0057957 | 22 | 1 CATTGTA CTTGTCTCGGGCTGA   | miRNA | miR-25 |
| t0058930 | 21 | 1 AATTGCACTTGTATCGGTCTG     | miRNA | miR-25 |
| t0059181 | 22 | 1 CATTGCACGTGTCTCGGTCTGA    | miRNA | miR-25 |
| t0059257 | 22 | 1 CATTGCACTTGTCTCTGTCTGC    | miRNA | miR-25 |
| t0059441 | 22 | 1 CATTGCCTTTGTCTCGGTCTGA    | miRNA | miR-25 |
| t0059874 | 23 | 1 CATTGCCCTTGTCTCGGTCTGAA   | miRNA | miR-25 |
| t0060514 | 22 | 1 CATTTA ACTTGTCTCGGTCTGA   | miRNA | miR-25 |
| t0060527 | 22 | 1 CATTGCACTTGTCTAGGGCTGA    | miRNA | miR-25 |
| t0060530 | 22 | 1 CATTGCACATGTCTCGGGCTGA    | miRNA | miR-25 |
| t0060863 | 22 | 1 CATTGCATTTGCCTCGGTCTGA    | miRNA | miR-25 |
| t0061600 | 19 | 1 CATTGCACTTGTCTCAGTC       | miRNA | miR-25 |
| t0061877 | 22 | 1 CACTGCACTTGTCTCGGTCTGT    | miRNA | miR-25 |
| t0062558 | 23 | 1 CATTACACTTGTCTCGGTCTGAA   | miRNA | miR-25 |
| t0062593 | 22 | 1 TATTGCAATTGTCTCGGTCTGA    | miRNA | miR-25 |
| t0062611 | 18 | 1 CATTGCACTTGTCTCGGG        | miRNA | miR-25 |
| t0063330 | 22 | 1 TATTGCACTTGTCTCAGTCTGA    | miRNA | miR-25 |
| t0064092 | 22 | 1 CATTACACTTGTCTCGGCCTGA    | miRNA | miR-25 |
| t0064121 | 22 | 1 CATCGCACTTGTCTCGGTCTTA    | miRNA | miR-25 |
| t0064995 | 22 | 1 CATTGCACTTGGCTCGGTCTGT    | miRNA | miR-25 |
| t0065910 | 21 | 1 CATTGAACTTGTCTCGGGCTG     | miRNA | miR-25 |

|          |    |                                 |       |         |
|----------|----|---------------------------------|-------|---------|
| t0066208 | 21 | 1 CATTGCACTTGTCTCGGGCTA         | miRNA | miR-25  |
| t0066290 | 23 | 1 CATTGCACTTGTCTCGGGCTGTT       | miRNA | miR-25  |
| t0066720 | 22 | 1 CATTGTA CTCTCGGTCTGA          | miRNA | miR-25  |
| t0067006 | 23 | 1 CATTGCACTTGTCCCGGTCTGAT       | miRNA | miR-25  |
| t0067068 | 20 | 1 ATTACACTTGTCTCGGTCTG          | miRNA | miR-25  |
| t0067246 | 23 | 1 CGTTGCACTTGTCTCGGTCTGAA       | miRNA | miR-25  |
| t0068302 | 21 | 1 ACTGCACTTGTCTCGGTCTGA         | miRNA | miR-25  |
| t0068412 | 21 | 1 CATTGCACTAGTCTCGGTCTG         | miRNA | miR-25  |
| t0068468 | 23 | 1 CATTGCAATTGTCTCGGTCTGAA       | miRNA | miR-25  |
| t0068562 | 22 | 1 CATTGCAGTTGTCTCGGTCTGA        | miRNA | miR-25  |
| t0069057 | 23 | 1 CATTGCAATTGTCTCGGTCTGAG       | miRNA | miR-25  |
| t0069574 | 22 | 1 CATTGCAATTGTCTCGGTCTCA        | miRNA | miR-25  |
| t0069775 | 22 | 1 CATTGCACTTGTCTCGGTCTGGA       | miRNA | miR-25  |
| t0070066 | 22 | 1 CATTGCAATTGTCTCGGTCTGC        | miRNA | miR-25  |
| t0071562 | 23 | 1 CATTGCACTTGTCTCAGTCTGTA       | miRNA | miR-25  |
| t0072303 | 42 | 1 CATTGCACTTGTCTCGGTCTGACGGGGCT | miRNA | miR-25  |
| t0072352 | 23 | 1 CATTGCACTTGTCTTGGTCTGAA       | miRNA | miR-25  |
| t0072855 | 22 | 1 CATTGCACTTGGCTCGGGCTGA        | miRNA | miR-25  |
| t0072985 | 29 | 1 CATTGCACTTGTCTCGGCCTGAAAATCAT | miRNA | miR-25  |
| t0075483 | 22 | 1 CATTGCATTTGTCTCGGCCTGA        | miRNA | miR-25  |
| t0076202 | 21 | 1 CATTGCAATTGTCTCGGACTG         | miRNA | miR-25  |
| t0076653 | 21 | 1 CATTCACTTGTCTCGGTCTG          | miRNA | miR-25  |
| t0076895 | 21 | 1 ATTGCACTTGTCTCGGTCCGA         | miRNA | miR-25  |
| t0077889 | 20 | 1 CATTGCACTTGTCTGGGTTT          | miRNA | miR-25  |
| t0077892 | 22 | 1 CATTGCACTTGTCTCGGTCTGC        | miRNA | miR-25  |
| t0079140 | 19 | 1 CATTGCACTAGTCTCGGTC           | miRNA | miR-25  |
| t0079819 | 21 | 1 CATTGCACTTGTCTCAGGTCTG        | miRNA | miR-25  |
| t0080012 | 22 | 1 CATTGTAATTGTCTCGGTCTGA        | miRNA | miR-25  |
| t0080412 | 23 | 1 CATTGTA CTCTCGGTCTGAA         | miRNA | miR-25  |
| t0080691 | 22 | 1 CATTGCAATTGTCTCGGTATGA        | miRNA | miR-25  |
| t0080733 | 22 | 1 CATTGCAGTTGTCTCGGTGTGA        | miRNA | miR-25  |
| t0081309 | 22 | 1 CGTTGCATTTGTCTCGGTCTGA        | miRNA | miR-25  |
| t0081398 | 27 | 1 AATTGCACTTGTCTCGGTCTGGCGGGC   | miRNA | miR-25  |
| t0081546 | 21 | 1 CATTGCACTTGTCTTGGGCTG         | miRNA | miR-25  |
| t0081587 | 18 | 1 CGTTGCACTTGTCTCGGT            | miRNA | miR-25  |
| t0081739 | 21 | 1 ATCGCACTTGTCTCGGTCTGA         | miRNA | miR-25  |
| t0082126 | 22 | 1 CATTGCACTTGTCTCAGTCTGT        | miRNA | miR-25  |
| t0082469 | 35 | 1 CATTGCACTTGTCTCGGGCTGCAGGAATT | miRNA | miR-25  |
| t0082686 | 21 | 1 CATTGTA CTCTCAGTCTG           | miRNA | miR-25  |
| t0083230 | 22 | 1 CATTGAACTTGTCTCGGGCTGA        | miRNA | miR-25  |
| t0084426 | 22 | 1 CATTGCTCTTGTCTCGGCCTGA        | miRNA | miR-25  |
| t0084629 | 21 | 1 CATTGCACTTGTCTCGGTCTC         | miRNA | miR-25  |
| t0085288 | 22 | 1 CATTGCAATTGTCTAGGTCTGA        | miRNA | miR-25  |
| t0086341 | 21 | 1 CATTGCACTCGTCTCGGTCTA         | miRNA | miR-25  |
| t0086373 | 26 | 1 TGGCTCAGTTCAGCAGGAACCGTATC    | miRNA | miR-24b |
| t0086612 | 23 | 1 TGGCTCAGTTCAGCAGGAATAGT       | miRNA | miR-24b |
| t0086694 | 24 | 1 TGA CT CAGTTCAGCAGGAACAGAA    | miRNA | miR-24b |
| t0087328 | 25 | 1 TGGCTCAGTTCAGCAGGAACAGATG     | miRNA | miR-24b |
| t0088095 | 24 | 1 TGGCTCAGTTAAGCAGGAACAGAA      | miRNA | miR-24b |
| t0088279 | 25 | 1 TGGCTCAGTTCAGCAGGCACAGATC     | miRNA | miR-24b |
| t0089513 | 21 | 1 TGGCTCAGTTCAGCAGGACCA         | miRNA | miR-24b |
| t0089992 | 23 | 1 TGGCTCAGTTCAGCAGGAAAAGT       | miRNA | miR-24b |
| t0090380 | 24 | 1 TGGCTTAGTTCAGCAGGAACAGAA      | miRNA | miR-24b |
| t0090784 | 23 | 1 TGGCTCAGTTCAGCAGGAACAGC       | miRNA | miR-24b |
| t0091143 | 26 | 1 TGGCTCAGTTCAGCAGTACCAGAATC    | miRNA | miR-24b |
| t0091471 | 24 | 1 TGGCTCAGTTCAGCAGGAACAGGT      | miRNA | miR-24b |
| t0092457 | 25 | 1 TGGCTCAGTTCAGCAGGAACAGGTC     | miRNA | miR-24b |
| t0042034 | 23 | 1 TGGCTCAGTTCAGCAGGAACGGT       | miRNA | miR-24b |

|          |    |                              |       |          |
|----------|----|------------------------------|-------|----------|
| t0042416 | 22 | 1 GACTCAGTTCAGCAGGAACAGA     | miRNA | miR-24b  |
| t0043153 | 21 | 1 TGGCTCAGTTCAGCAGGAGCA      | miRNA | miR-24b  |
| t0047166 | 25 | 1 CGGCTCAGTTCAGCAGGAACAGATC  | miRNA | miR-24b  |
| t0048869 | 22 | 1 TGGCTCAGTTCAGCAGGAACAC     | miRNA | miR-24b  |
| t0057723 | 23 | 1 TGGCTCAGTTCAGCAGGCAAAGT    | miRNA | miR-24b  |
| t0058308 | 21 | 1 TGGCTCAGTTCAGCAGGAATA      | miRNA | miR-24b  |
| t0062588 | 24 | 1 TGGCTCAGTTCAGCAGGAACAGGA   | miRNA | miR-24b  |
| t0067878 | 26 | 1 GGCTCTAAGGGCTGGGTCCGGCGGGC | miRNA | miR-2487 |
| t0068238 | 20 | 1 GATTGGCTCTGAGGGCTGGG       | miRNA | miR-2487 |
| t0068276 | 24 | 1 GGCTCTAAGGGCTGGGGCCGGTCGG  | miRNA | miR-2487 |
| t0073176 | 21 | 1 TATTTTTTTGTAGGTCGTTTT      | miRNA | miR-2421 |
| t0073518 | 23 | 1 TGGCTCAGTTCAGAAGGAACAGT    | miRNA | miR-24   |
| t0073830 | 26 | 1 TGGCACAGTTCAGCAGGAACAGTATC | miRNA | miR-24   |
| t0074158 | 23 | 1 TGGCTCAGTTAAGCAGGAACAGT    | miRNA | miR-24   |
| t0076480 | 21 | 1 TGGCTAAGTTCAGCAGGAACA      | miRNA | miR-24   |
| t0078280 | 24 | 1 TGGCTAAGTTCAGCAGGAACAGTG   | miRNA | miR-24   |
| t0079914 | 23 | 1 TGGCTCAGTTCAGCAGGAACAGT    | miRNA | miR-24   |
| t0082418 | 22 | 1 TGGCTCCGTTTTCAGCAGGAACAG   | miRNA | miR-24   |
| t0083086 | 23 | 1 TGGCTCAGCTCAGCAGGAACAGT    | miRNA | miR-24   |
| t0087016 | 23 | 1 TGGCTCGGTTTTCAGCAGGAACAGT  | miRNA | miR-24   |
| t0059769 | 21 | 1 TGGCTCAGTTCAGCAGGAACA      | miRNA | miR-24   |
| t0060950 | 23 | 1 CGGCTCAGTTCAGCAGGAACAGT    | miRNA | miR-24   |
| t0093250 | 24 | 1 TGGCTCAGTTCAGCCGGAACAGTG   | miRNA | miR-24   |
| t0069391 | 19 | 1 TCAGTTCAGCAGGGACAGT        | miRNA | miR-24   |
| t0041440 | 23 | 1 TAGCTCAGTTCAGCAGGAACAGT    | miRNA | miR-24   |
| t0045767 | 22 | 1 TGGCTCAGTCCAGCAGGAACAG     | miRNA | miR-24   |
| t0046007 | 23 | 1 TGGATCAGTTCAGCAGGAACAGT    | miRNA | miR-24   |
| t0046498 | 22 | 1 TGGCTCAGTTCAGCAAGAACAG     | miRNA | miR-24   |
| t0048995 | 24 | 1 TGGCTCGGTTTTCAGCAGGAACAGTT | miRNA | miR-24   |
| t0052082 | 22 | 1 TGGCTCAGTTGAGCAGGAACAG     | miRNA | miR-24   |
| t0054897 | 22 | 1 TGGCTCAGTTCAGCAGGAACAG     | miRNA | miR-24   |
| t0059279 | 22 | 1 TGCCTCAGTTCAGCAGGAACAG     | miRNA | miR-24   |
| t0060373 | 23 | 1 TGGCTCAGATCAGCAGGAACAGT    | miRNA | miR-24   |
| t0060707 | 18 | 1 TGGTTCAGTTCAGCAGGA         | miRNA | miR-24   |
| t0060997 | 22 | 1 TGGCTCAGCTCAGCAGGAACAG     | miRNA | miR-24   |
| t0062461 | 23 | 1 TGGCTCCGTTTTCAGCAGGAACAGT  | miRNA | miR-24   |
| t0063248 | 23 | 1 AGGCTCAGTTCAGCAGGAACAGT    | miRNA | miR-24   |
| t0064018 | 22 | 1 TGGCTCAATTCAGCAGGAACAG     | miRNA | miR-24   |
| t0065240 | 22 | 1 TGGCTCAGTTCAACAGGAACAG     | miRNA | miR-24   |
| t0067896 | 23 | 1 TGGCTCAGTTCAGTAGGAACAGT    | miRNA | miR-24   |
| t0069017 | 19 | 1 TGGCTCAGTTCAGCAGGA         | miRNA | miR-24   |
| t0071373 | 18 | 1 TGGCTCAGTTCAGCAGGC         | miRNA | miR-24   |
| t0073722 | 21 | 1 TGACTCAGTTCAGCAGGAACA      | miRNA | miR-24   |
| t0073798 | 23 | 1 TGGCTCAGTTCAGCAGGAACAGT    | miRNA | miR-24   |
| t0074220 | 24 | 1 TGGCTTAGTTCAGCAGGAACAGTT   | miRNA | miR-24   |
| t0074931 | 23 | 1 TGGCTCAGTTCAGGAGGAACAGT    | miRNA | miR-24   |
| t0075107 | 23 | 1 TTGGGTTTCTGGAATGCTGATTT    | miRNA | miR-23b* |
| t0075446 | 21 | 1 TGGGTTTCTGGCATGCTGCTT      | miRNA | miR-23b* |
| t0076086 | 20 | 1 TGGGATCCTGGCATGCTGAT       | miRNA | miR-23b* |
| t0076813 | 20 | 1 ATCACATTGCAAGGGATTAC       | miRNA | miR-23b  |
| t0081600 | 19 | 1 ATCACATTGCCAGGGCTTA        | miRNA | miR-23b  |
| t0082684 | 20 | 1 ATTACATTGCCAGGGATTAC       | miRNA | miR-23b  |
| t0083848 | 19 | 1 ATCACATTGCCAGGAATTA        | miRNA | miR-23b  |
| t0084438 | 24 | 1 ATCACATTGCCAGGGATTACCCCT   | miRNA | miR-23b  |
| t0085416 | 20 | 1 ATCACATTGCCCGGGATTAA       | miRNA | miR-23b  |
| t0086502 | 19 | 1 ATCACATTGCCAGGGACTA        | miRNA | miR-23b  |
| t0087703 | 20 | 1 ATCACATTGACAGGGATTAC       | miRNA | miR-23b  |
| t0089145 | 19 | 1 ATAACATTGCCAGGGATTA        | miRNA | miR-23b  |

|          |    |                           |       |         |
|----------|----|---------------------------|-------|---------|
| t0092178 | 21 | 1 ATCACATCGCCAGGGATTTCA   | miRNA | miR-23a |
| t0048967 | 21 | 1 AGCACATTGCCAGGGATTTCCG  | miRNA | miR-23a |
| t0060158 | 21 | 1 ATCAAATTGCCAGGGATTTCC   | miRNA | miR-23a |
| t0073207 | 20 | 1 ATCACGTTGCCAGGGATTTTC   | miRNA | miR-23a |
| t0049083 | 20 | 1 ATCACATTGTCAGGGATTTA    | miRNA | miR-23a |
| t0051777 | 19 | 1 ATCTCATTGCCAGGGATTT     | miRNA | miR-23a |
| t0055011 | 19 | 1 ATCAGATTGCCAGGGATTT     | miRNA | miR-23a |
| t0056471 | 20 | 1 ATCACATTGCCAGGGAGTTC    | miRNA | miR-23a |
| t0057419 | 22 | 1 ATCACATTGCCAGGGATTTACA  | miRNA | miR-23a |
| t0059468 | 20 | 1 ATCACGTTGCCAGGGATTTA    | miRNA | miR-23a |
| t0063717 | 20 | 1 ATCACCTTGCCAGGGATTTTC   | miRNA | miR-23a |
| t0082983 | 20 | 1 ATCACATCGCCAGGGATTTTC   | miRNA | miR-23a |
| t0088612 | 19 | 1 ATCACATTGCAAGGGCTTT     | miRNA | miR-23a |
| t0040904 | 23 | 1 ATCACATTGCCAGGGCTTTCCAA | miRNA | miR-23a |
| t0041704 | 18 | 1 TCACATTGCCAGGGATTT      | miRNA | miR-23a |
| t0043627 | 20 | 1 ATCACATTGCCAGGGATTTCC   | miRNA | miR-23a |
| t0045799 | 19 | 1 ATCACATTGCCAAGGATTT     | miRNA | miR-23a |
| t0046867 | 21 | 1 ATCACATAGCCAGGGATTTCA   | miRNA | miR-23a |
| t0047228 | 21 | 1 ATCACATTGCCAGGGATTTAC   | miRNA | miR-23a |
| t0048785 | 21 | 1 AATCATATTGCCAGGGATTTA   | miRNA | miR-23a |
| t0050527 | 19 | 1 GTCACATTGCCAGGGATTT     | miRNA | miR-23a |
| t0051144 | 21 | 1 ATAACATTGCCAGGGATTTAA   | miRNA | miR-23a |
| t0051758 | 20 | 1 ATCACATTGCCAGGGCTTTT    | miRNA | miR-23a |
| t0052037 | 20 | 1 ATCACATTGCCAGGGGTTTC    | miRNA | miR-23a |
| t0054634 | 21 | 1 ATCACATTGCAAGGGATTTCC   | miRNA | miR-23a |
| t0054753 | 20 | 1 ATCACATTGCCAGGGACTTC    | miRNA | miR-23a |
| t0055366 | 19 | 1 ATCACGTTGCCAGGGATTT     | miRNA | miR-23a |
| t0055491 | 19 | 1 ATCACATTGCCAGGGATGT     | miRNA | miR-23a |
| t0057146 | 20 | 1 ATCACATTGCTAGGGATTTTC   | miRNA | miR-23a |
| t0057444 | 20 | 1 ATCACATTGCCAAGGATTTTC   | miRNA | miR-23a |
| t0057657 | 22 | 1 ATAACATTGACAGGGATTTCCA  | miRNA | miR-23a |
| t0057950 | 20 | 1 ATCCCATTGCCAGGGATTTA    | miRNA | miR-23a |
| t0058302 | 20 | 1 ATTACATTGCCAGGGATTTT    | miRNA | miR-23a |
| t0059358 | 19 | 1 ACCACATTGCCAGGGATTT     | miRNA | miR-23a |
| t0063135 | 20 | 1 ATCACATTGACAGGGATTTT    | miRNA | miR-23a |
| t0064025 | 19 | 1 ATCAAATAGCCAGGGATTT     | miRNA | miR-23a |
| t0065811 | 20 | 1 ATCACATTGCCAGGGTTTTA    | miRNA | miR-23a |
| t0066691 | 19 | 1 ATCACATTGCCAGAGATTT     | miRNA | miR-23a |
| t0067409 | 23 | 1 ATCACATTGCCAGGGATTTCTAA | miRNA | miR-23a |
| t0067762 | 21 | 1 ATCACATTGCCAGAGATTTCC   | miRNA | miR-23a |
| t0067763 | 21 | 1 GTCACATTGCCAGGGATTTCA   | miRNA | miR-23a |
| t0067809 | 19 | 1 ATCACATTTCCAGGGATTT     | miRNA | miR-23a |
| t0067849 | 20 | 1 ATCAAATTGCCAGGGATTTA    | miRNA | miR-23a |
| t0069983 | 22 | 1 ATCACCTTGCCAGGGATTTCCA  | miRNA | miR-23a |
| t0070014 | 18 | 1 TTCACATTGCCAGGGATT      | miRNA | miR-23a |
| t0071467 | 20 | 1 ATCCCATTGCCAGGGATTTTC   | miRNA | miR-23a |
| t0071672 | 22 | 1 ATCACATTGCCAGGGCTTTCCA  | miRNA | miR-23a |
| t0073320 | 19 | 1 ATCACTTTGCCAGGGATTT     | miRNA | miR-23a |
| t0073625 | 22 | 1 ATCACATTGCCAGGGGTTTCCA  | miRNA | miR-23a |
| t0074797 | 19 | 1 TTCACATTGCCAGGGATTT     | miRNA | miR-23a |
| t0075012 | 20 | 1 ATCACATTGCCAGGGGTTTT    | miRNA | miR-23a |
| t0075348 | 18 | 1 ATCACATAGCCAGGGATT      | miRNA | miR-23a |
| t0076093 | 20 | 1 ATCACATTGCCAGGGATTTCA   | miRNA | miR-23a |
| t0076834 | 19 | 1 ATCACATTGCTAGGGATTT     | miRNA | miR-23a |
| t0076913 | 20 | 1 ATCACATTGCCAGGGATTTG    | miRNA | miR-23a |
| t0077981 | 23 | 1 ATCACATTGCCAGGGATTTCCCA | miRNA | miR-23a |
| t0078835 | 20 | 1 ATCACTTTGCCAGGGATTTTC   | miRNA | miR-23a |
| t0078855 | 19 | 1 ATCACATTGCCCGGGATTT     | miRNA | miR-23a |

|          |    |                            |       |           |
|----------|----|----------------------------|-------|-----------|
| t0079434 | 18 | 1 ATCATATTGCCAGGGATT       | miRNA | miR-23a   |
| t0080121 | 20 | 1 ACCACATTGCCAGGGATTC      | miRNA | miR-23a   |
| t0082945 | 22 | 1 TAGGAGGGGGTGTGATAGGATC   | miRNA | miR-2392  |
| t0083088 | 20 | 1 TATTGCACTCGCCCCGGCCA     | miRNA | miR-235   |
| t0083155 | 20 | 1 TATTGCACTCGGCCCGGCCA     | miRNA | miR-235   |
| t0083588 | 18 | 1 CGGCGGCGTCGGCGGCGG       | miRNA | miR-2305  |
| t0087559 | 23 | 1 CGGCGGCGTCGGCGGCGGGGGA   | miRNA | miR-2305  |
| t0087828 | 21 | 1 CGGTGGCGGCGGCGGCGGGGG    | miRNA | miR-2305  |
| t0088338 | 20 | 1 CGGCGGCGGCGGCGGGGGGG     | miRNA | miR-2305  |
| t0088730 | 22 | 1 CGGCGGTGGCGGCGGCGGGGGG   | miRNA | miR-2305  |
| t0089417 | 22 | 1 CGGTGGCGGCGGCGGCGGGGGC   | miRNA | miR-2305  |
| t0090079 | 19 | 1 AAAGATTGGTTTTGTTTT       | miRNA | miR-2284c |
| t0090861 | 23 | 1 AAGCAGCTGTAGAGTATGCCTGG  | miRNA | miR-2278  |
| t0092139 | 21 | 1 AAGCTGCCAGTTGAAGAATTT    | miRNA | miR-22-3p |
| t0092243 | 20 | 1 AAGCTACCAGTTGAAGAACT     | miRNA | miR-22-3p |
| t0066922 | 19 | 1 AAGCTGCCAGTTGCAGAAC      | miRNA | miR-22-3p |
| t0041395 | 18 | 1 AAAGTCCATTTGAAGAA        | miRNA | miR-22-3p |
| t0050609 | 20 | 1 GAGCTGCCAGTTGAAGAACT     | miRNA | miR-22-3p |
| t0053865 | 19 | 1 AGGCTGCCAGTTGAAGAAC      | miRNA | miR-22-3p |
| t0057319 | 19 | 1 AAGCTGCCAGTTGAAGACC      | miRNA | miR-22-3p |
| t0059365 | 23 | 1 AAGCTGACAGTTGAAGAAGTGT   | miRNA | miR-22-3p |
| t0063802 | 19 | 1 AAGCTGCTAGTTGAAGAAC      | miRNA | miR-22-3p |
| t0071034 | 22 | 1 AAGCTGCCAGTTGAAGACTGT    | miRNA | miR-22-3p |
| t0072603 | 22 | 1 ACGCTGCCAGTTGAAGAAGTGT   | miRNA | miR-22-3p |
| t0054892 | 20 | 1 AAGCTGCCAGTTGAAGATCT     | miRNA | miR-22-3p |
| t0073022 | 19 | 1 AAGCTGCCAGTTGAAGGAC      | miRNA | miR-22-3p |
| t0049691 | 22 | 1 TGTCAGTTTCGTCAAATACCCCA  | miRNA | miR-223   |
| t0057627 | 22 | 1 TGTCAGTTTGTCAAATACCCCA   | miRNA | miR-223   |
| t0057678 | 22 | 1 TGTCAGTTTGTCAAATAACCCCA  | miRNA | miR-223   |
| t0061409 | 22 | 1 TGTCAGGTTGTCAAATACCCCA   | miRNA | miR-223   |
| t0066612 | 22 | 1 TGTCAGTTTGTCTAATACCCCA   | miRNA | miR-223   |
| t0072243 | 21 | 1 AGCTACATCTGGCTAATGGGT    | miRNA | miR-222   |
| t0077746 | 21 | 1 AGCTACATCTGGCTAGTGGGT    | miRNA | miR-222   |
| t0080558 | 21 | 1 AGCTACATCCGGCTACTGGGT    | miRNA | miR-222   |
| t0080942 | 22 | 1 AGATACATCTGGCTACTGGGAA   | miRNA | miR-222   |
| t0081598 | 23 | 1 AGCTACATCTGGCTACTGGGCCT  | miRNA | miR-222   |
| t0085219 | 21 | 1 AGCTACAACCTGGCTACTGGGT   | miRNA | miR-222   |
| t0087342 | 21 | 1 AGCTACATCTGGCTCCTGGGT    | miRNA | miR-222   |
| t0088122 | 21 | 1 AGTTACATCTGGCTACTGGGT    | miRNA | miR-222   |
| t0041175 | 21 | 1 AGCTACACCTGGCTACTGGGT    | miRNA | miR-222   |
| t0041850 | 21 | 1 AGCTACATCTGGCTACTGGGC    | miRNA | miR-222   |
| t0050088 | 23 | 1 AGCTACATCTGGCTACTGGGTTT  | miRNA | miR-222   |
| t0054063 | 23 | 1 AGCTACATCTGGCTACTGGGTCC  | miRNA | miR-222   |
| t0061664 | 22 | 1 AGCTGCATCTGGCTACTGGGTA   | miRNA | miR-222   |
| t0043595 | 22 | 1 AGCTACATTTGGCTACTGGGAA   | miRNA | miR-222   |
| t0047506 | 21 | 1 ACCTGACATACAATGTAGATT    | miRNA | miR-221*  |
| t0052245 | 23 | 1 AAAGTGGCATAACAATGTAGATTT | miRNA | miR-221*  |
| t0053241 | 22 | 1 ACCTGGCATAACAATGTGGATTT  | miRNA | miR-221*  |
| t0055308 | 19 | 1 ACCTGGCATGCAATGTAGA      | miRNA | miR-221*  |
| t0060986 | 22 | 1 ACCTGGCATAAAAATGTAGATTT  | miRNA | miR-221*  |
| t0061609 | 21 | 1 AACTGGCATAACAATGTAGATT   | miRNA | miR-221*  |
| t0063818 | 21 | 1 ACATGGCATCCAATGTAGATT    | miRNA | miR-221*  |
| t0064224 | 21 | 1 AGCTACACTGTCTGCTGGGTT    | miRNA | miR-221   |
| t0072215 | 22 | 1 AGCTACATTGTCCGCTGGGTTA   | miRNA | miR-221   |
| t0073359 | 21 | 1 AGCTACATTGTATGCTGGGTT    | miRNA | miR-221   |
| t0078378 | 23 | 1 AGCTACATTGTCTGCTGGGGTAA  | miRNA | miR-221   |
| t0081809 | 20 | 1 AGCTACATTGTCTGCTGGGG     | miRNA | miR-221   |
| t0092153 | 22 | 1 AGCTACATTATCTGCTGGGTTT   | miRNA | miR-221   |

|          |    |                                 |       |              |
|----------|----|---------------------------------|-------|--------------|
| t0047432 | 20 | 1 AGTTCTTCAGTGGCAAGGTT          | miRNA | miR-22*      |
| t0057449 | 21 | 1 AGTTCTTGAGTGGCAAGCTTT         | miRNA | miR-22*      |
| t0057921 | 23 | 1 GACTGGGGCGGTACATCTGTTAC       | miRNA | miR-219-2-3p |
| t0068216 | 26 | 1 TGACTGGGGCGGTACATCTGTTCAAT    | miRNA | miR-219-2-3p |
| t0071762 | 25 | 1 GACTGGGGCGGAACATCTGTTAAAT     | miRNA | miR-219-2-3p |
| t0074112 | 24 | 1 TTGACTGGGGCGGGACATCTGTTA      | miRNA | miR-219-2-3p |
| t0083263 | 23 | 1 GACTGGGGCGGAACATCTGTTAA       | miRNA | miR-219-2-3p |
| t0052407 | 20 | 1 TGACTGGGGCGGAACATCTG          | miRNA | miR-219-2-3p |
| t0059749 | 20 | 1 GACTGTGGCGGGACATCTGT          | miRNA | miR-219-2-3p |
| t0065402 | 18 | 1 TTGACTGGGGCGGGACAT            | miRNA | miR-219-2-3p |
| t0066637 | 24 | 1 TGACTGGGGCGGAACATCTGTTAT      | miRNA | miR-219-2-3p |
| t0080167 | 21 | 1 TTGACTGGGGCGGAACATCTG         | miRNA | miR-219-2-3p |
| t0093074 | 19 | 1 TGACTGGGGCGGGACATCT           | miRNA | miR-219-2-3p |
| t0052094 | 22 | 1 GACTGGGGCGGAACATCTGTTA        | miRNA | miR-219-2-3p |
| t0052265 | 28 | 1 TGACTGGGGCGGGACATCTGTTAAATAT  | miRNA | miR-219-2-3p |
| t0041876 | 20 | 1 TGGGGCGGCACATCTGTAA           | miRNA | miR-219-2-3p |
| t0042524 | 22 | 1 TGACTGAGGCGGTACATCTGTT        | miRNA | miR-219-2-3p |
| t0044196 | 20 | 1 GACTGAGGCGGTACATCTGT          | miRNA | miR-219-2-3p |
| t0045046 | 27 | 1 GACTGGGGCGGAACATCTGTTAAATAT   | miRNA | miR-219-2-3p |
| t0045982 | 25 | 1 GACTGGGGCGGAACATCTGTTAAAG     | miRNA | miR-219-2-3p |
| t0047470 | 29 | 1 TGACTGGGGCGGTACATCTGTTAAATATT | miRNA | miR-219-2-3p |
| t0049470 | 19 | 1 ACTGGGGCGGGACATCTGT           | miRNA | miR-219-2-3p |
| t0052779 | 20 | 1 TGATTGGGGCGGGACATCTG          | miRNA | miR-219-2-3p |
| t0053523 | 20 | 1 GACTGCGGCGGTACATCTGT          | miRNA | miR-219-2-3p |
| t0056651 | 25 | 1 TTGACTGGGGCGGAACATCTGTTAA     | miRNA | miR-219-2-3p |
| t0058176 | 21 | 1 GACTGGGGCGGGACATCTTTT         | miRNA | miR-219-2-3p |
| t0060732 | 24 | 1 TGACTGGGGCGGAACATCTGTTAA      | miRNA | miR-219-2-3p |
| t0065405 | 20 | 1 TGACTGGGGCGGCACATCTG          | miRNA | miR-219-2-3p |
| t0066955 | 19 | 1 GACTGGGGCGGCACATCTG           | miRNA | miR-219-2-3p |
| t0068152 | 20 | 1 GACTGTGGCGGTACCTCTGT          | miRNA | miR-219-2-3p |
| t0071233 | 21 | 1 TGACTGAGGCGGTACATCTGT         | miRNA | miR-219-2-3p |
| t0074846 | 24 | 1 TGACTGGGGCGGGACATCTGTTAA      | miRNA | miR-219-2-3p |
| t0075606 | 21 | 1 AGAGTTGAGTCTGGACGCCTT         | miRNA | miR-219-1-3p |
| t0075642 | 21 | 1 AGAGTTGAGTCTGGATGTCTT         | miRNA | miR-219-1-3p |
| t0077550 | 23 | 1 TGATTGTCCATTCGCATTTCTTG       | miRNA | miR-219      |
| t0077833 | 20 | 1 TAATCGGACGAAATTTCTAA          | miRNA | miR-2178     |
| t0084469 | 25 | 1 TAATCTCAGCTGGAAACTGGGAATC     | miRNA | miR-216a     |
| t0084943 | 20 | 1 TGAGAGATTGTTGCATATTT          | miRNA | miR-2162-5p  |
| t0085173 | 19 | 1 AGTGAGATTGTTGCATCTA           | miRNA | miR-2162-5p  |
| t0085691 | 23 | 1 AGTGAGATTGTTGCATATTTACA       | miRNA | miR-2162-5p  |
| t0085858 | 19 | 1 ATTATGCAACGTTTCACTC           | miRNA | miR-2162-3p  |
| t0087908 | 21 | 1 TATTATGCAACGTTTCACTCT         | miRNA | miR-2162-3p  |
| t0087929 | 25 | 1 ATGACCTATGATTTGGCAGACAATC     | miRNA | miR-215      |
| t0090170 | 25 | 1 ATGACCTATGATTTGACCGACAATC     | miRNA | miR-215      |
| t0090382 | 25 | 1 ATGACCTATGATTTGACAGCCAATC     | miRNA | miR-215      |
| t0087032 | 25 | 1 ATGACCTATGATTTGACAGACAATC     | miRNA | miR-215      |
| t0088045 | 25 | 1 ATGACCTATAATTTGACAGACAATC     | miRNA | miR-215      |
| t0042417 | 25 | 1 ATGACCTATGATTTGACAGACAATA     | miRNA | miR-215      |
| t0069245 | 25 | 1 ATTACCTATGATTTGACAGACAATC     | miRNA | miR-215      |
| t0055353 | 25 | 1 ATGACCTATGACTTGACAGACAATC     | miRNA | miR-215      |
| t0043846 | 22 | 1 TTGGGGAAACGGCCGCTGCGAG        | miRNA | miR-2110     |
| t0087386 | 21 | 1 TTGGAGAAACGGCCGCTGAGT         | miRNA | miR-2110     |
| t0089477 | 23 | 1 TTGGGGAAAAGGCCGCGGAGTGG       | miRNA | miR-2110     |
| t0057451 | 21 | 1 TTGGGGAAACGGCCGCTGAGG         | miRNA | miR-2110     |
| t0091751 | 25 | 1 TTGGGGAAACGGCCGCTGAGGGAGA     | miRNA | miR-2110     |
| t0044434 | 21 | 1 TTGGGGAAACGGCCGCTGAGC         | miRNA | miR-2110     |
| t0053454 | 21 | 1 TTGGGGAAAACGGCCGCTGAGT        | miRNA | miR-2110     |
| t0055390 | 22 | 1 TTGGAGAAACGGCCGCTGAGTG        | miRNA | miR-2110     |

|          |    |                              |       |          |
|----------|----|------------------------------|-------|----------|
| t0056189 | 25 | 1 TTGGGGAAACGGCCGCTGAGTGGGA  | miRNA | miR-2110 |
| t0069497 | 22 | 1 TTGGGAAAACGGCCGCTGAGTG     | miRNA | miR-2110 |
| t0089654 | 22 | 1 TTGGGGAAACGGCCGCTGAGAG     | miRNA | miR-2110 |
| t0090922 | 22 | 1 TTGGGGAAACAGCCGCTGAGTG     | miRNA | miR-2110 |
| t0091059 | 23 | 1 TTGGGGAAACGGTCGCTGAGTGA    | miRNA | miR-2110 |
| t0044751 | 25 | 1 TTGGGGAAACGGCCGCTGAGAGAGA  | miRNA | miR-2110 |
| t0045563 | 21 | 1 TTGGGGAAACGGCCGCTGGGT      | miRNA | miR-2110 |
| t0046854 | 25 | 1 TTGGGGAAACGGCCGATGAGTGAGT  | miRNA | miR-2110 |
| t0048458 | 23 | 1 TTGGGGAAACGGCCGATGAGTGA    | miRNA | miR-2110 |
| t0048626 | 23 | 1 TTGAGGAAACGGCCGCTGAGTGA    | miRNA | miR-2110 |
| t0049172 | 21 | 1 TTGGGGAAACTGCCGCTGAGT      | miRNA | miR-2110 |
| t0052064 | 21 | 1 TTGGGGAAAAGGCCGCTGAGT      | miRNA | miR-2110 |
| t0058087 | 22 | 1 TTGGGGAAACGGCCACTGAGTG     | miRNA | miR-2110 |
| t0058338 | 22 | 1 TTGGGGAAAAGGCCGCTGAGTG     | miRNA | miR-2110 |
| t0059850 | 21 | 1 TTGGGGAAACGGCCGCTGCGT      | miRNA | miR-2110 |
| t0060261 | 24 | 1 TTGGGGAAACGGCCGCTGGGTGAG   | miRNA | miR-2110 |
| t0062057 | 25 | 1 TTGGGGCAACGGCCGCTGAGTGAGT  | miRNA | miR-2110 |
| t0063336 | 21 | 1 TTGGGGAAACGGCCGCCGAGT      | miRNA | miR-2110 |
| t0063942 | 25 | 1 TTGGGGCAACGGCCGCTGAGTGAGA  | miRNA | miR-2110 |
| t0067156 | 22 | 1 TTGGGGCAACGGCCGCTGAGTG     | miRNA | miR-2110 |
| t0073163 | 25 | 1 TTGGGGACACGGCCGCTGAGTGAGA  | miRNA | miR-2110 |
| t0073523 | 23 | 1 TTGGGGAAACGGCCGCTGAGAGA    | miRNA | miR-2110 |
| t0075645 | 23 | 1 TTGGGGAAACAGCCGCTGAGTGA    | miRNA | miR-2110 |
| t0075898 | 21 | 1 TTGGGGAAACGGCCGCTAAGT      | miRNA | miR-2110 |
| t0078651 | 21 | 1 TTGGGGAAACGACCGCTGAGT      | miRNA | miR-2110 |
| t0080777 | 24 | 1 TTGGGGAAACGGCCACTGAGTGAG   | miRNA | miR-2110 |
| t0082450 | 21 | 1 TTGGGAAACGGCCGCTGAGTG      | miRNA | miR-2110 |
| t0082645 | 21 | 1 TTATTTTTGTCATCCTTCGCC      | miRNA | miR-211  |
| t0083074 | 23 | 1 CTGTGCGCGTGACAGCGGCTGAT    | miRNA | miR-210  |
| t0083399 | 20 | 1 CTGTACGTGTGACAGCGGCT       | miRNA | miR-210  |
| t0083666 | 25 | 1 TAGCTTATCAGGCTGATGTTGAATC  | miRNA | miR-21   |
| t0083889 | 22 | 1 CAGCTTATCAGACTGATGTTGA     | miRNA | miR-21   |
| t0084424 | 24 | 1 TAGCTTATCAGACTGATGTTGCCA   | miRNA | miR-21   |
| t0084433 | 21 | 1 TAGCTTATCAGACTGATGCTG      | miRNA | miR-21   |
| t0085392 | 22 | 1 TAGCTTATCAGACTGATGTTTA     | miRNA | miR-21   |
| t0086838 | 25 | 1 TAGCTTATCAGACTGATGTTGACTC  | miRNA | miR-21   |
| t0087330 | 26 | 1 TAGCTTATCAGAATGATGTTGACATC | miRNA | miR-21   |
| t0088399 | 21 | 1 TAGCTCATCAGACTGATGTTG      | miRNA | miR-21   |
| t0091128 | 26 | 1 TAGCTTATCAGACTGATGTTAACATC | miRNA | miR-21   |
| t0092633 | 24 | 1 TAGCTTATCAGACTGATGTTGCTC   | miRNA | miR-21   |
| t0065249 | 22 | 1 TAGCTTATAAGACTGATGTTGA     | miRNA | miR-21   |
| t0062055 | 26 | 1 TAGCTTATCAGATTGATGTTGACATC | miRNA | miR-21   |
| t0073120 | 22 | 1 TAGCTTATCAGACTGACGTTGA     | miRNA | miR-21   |
| t0041041 | 22 | 1 TAGCTTTTCAGACTGATGTTGA     | miRNA | miR-21   |
| t0041073 | 20 | 1 TAGCTTATCCGACTGATGTT       | miRNA | miR-21   |
| t0041413 | 22 | 1 TAGCCTATCAGACTGATGTTGA     | miRNA | miR-21   |
| t0042828 | 21 | 1 TAGCTTATCAGAGTGATGTTG      | miRNA | miR-21   |
| t0042885 | 26 | 1 TAGCTTACCAGACTGATGTTGCCATC | miRNA | miR-21   |
| t0043626 | 22 | 1 TAGCTTATCAGACTGCTGTTGA     | miRNA | miR-21   |
| t0044066 | 21 | 1 TAGCCTATCAGACTGATGTTG      | miRNA | miR-21   |
| t0045781 | 21 | 1 TAGCTTATCAGACTGATATTG      | miRNA | miR-21   |
| t0045927 | 21 | 1 TAGCTTATCAAAGTATGTTG       | miRNA | miR-21   |
| t0046944 | 21 | 1 TAGCTTATCAGATTGATGTTG      | miRNA | miR-21   |
| t0048028 | 22 | 1 TAGCTTATGAGACTGATGTTGA     | miRNA | miR-21   |
| t0049688 | 24 | 1 TAGCTTATCACACTTATGTTGATC   | miRNA | miR-21   |
| t0051127 | 26 | 1 TAGCTTACCAGACTGATGTTGACATA | miRNA | miR-21   |
| t0051195 | 21 | 1 TAGCTTATCAGACTGATGGTG      | miRNA | miR-21   |
| t0051258 | 23 | 1 TCGCTTATCAGACTGATGTTGAC    | miRNA | miR-21   |

|          |    |                               |       |            |
|----------|----|-------------------------------|-------|------------|
| t0051344 | 24 | 1 TAGCTTATCAGACTGACGTTGATC    | miRNA | miR-21     |
| t0051747 | 27 | 1 TAGCTTATCAGACTGATGTTGCCTATC | miRNA | miR-21     |
| t0051781 | 22 | 1 TAGCTTATCAGCCTGATGTTGA      | miRNA | miR-21     |
| t0053349 | 22 | 1 TAGCTTATCAGACCGATGTTGA      | miRNA | miR-21     |
| t0054244 | 21 | 1 TAACTTATCAGACTGATGTTG       | miRNA | miR-21     |
| t0055168 | 21 | 1 TAGCTTATCAGACTGATGTTA       | miRNA | miR-21     |
| t0055475 | 20 | 1 TAGCTCATCAGACTGATGTT        | miRNA | miR-21     |
| t0057070 | 23 | 1 TAGCTTATTAGACTGATGTTGAC     | miRNA | miR-21     |
| t0059670 | 26 | 1 TAGCTTATCAGACTGATGTTGAGATC  | miRNA | miR-21     |
| t0059766 | 21 | 1 CAGCTTATCAGACTGATGTTG       | miRNA | miR-21     |
| t0062526 | 26 | 1 TAGCTTATCAAACCTGATGTTGACATC | miRNA | miR-21     |
| t0063192 | 21 | 1 TAGCTTATCAGCCTGATGTTG       | miRNA | miR-21     |
| t0063261 | 25 | 1 TACCTTATCAGACTGATGTTGAATC   | miRNA | miR-21     |
| t0065036 | 27 | 1 TAGCTTATCAGACTGATGTTGACCATC | miRNA | miR-21     |
| t0066648 | 22 | 1 TAGCTTATCGGACTGATGTTGA      | miRNA | miR-21     |
| t0067044 | 21 | 1 TAGCTTATCGGACTGATGTTG       | miRNA | miR-21     |
| t0067658 | 21 | 1 TAGCTTATCTGACTGATGTTG       | miRNA | miR-21     |
| t0068351 | 22 | 1 TAGCTTATCAGACTAATGTTGA      | miRNA | miR-21     |
| t0069118 | 26 | 1 TAGCTTATCAGACCGATGTTGACATC  | miRNA | miR-21     |
| t0070270 | 24 | 1 TAGCTTATCAGTCTGATGTTGATC    | miRNA | miR-21     |
| t0070549 | 21 | 1 TAGCTTATCAGACCGATGTTG       | miRNA | miR-21     |
| t0071110 | 26 | 1 TAGCTTATCAGACTGATGTTGACATA  | miRNA | miR-21     |
| t0071359 | 21 | 1 TAGCTTACCAGACTGATGTTG       | miRNA | miR-21     |
| t0071932 | 21 | 1 TACCTTATCAGACTGATGTTG       | miRNA | miR-21     |
| t0073199 | 21 | 1 TAGCTTATCAGACTGATTTTG       | miRNA | miR-21     |
| t0075749 | 22 | 1 TGGCTTATCAGACTGATGTTGA      | miRNA | miR-21     |
| t0077483 | 26 | 1 TAGCTTATTAGACTGATGTTGACATC  | miRNA | miR-21     |
| t0077694 | 24 | 1 TAGCTTATCAGACTGATGTTGCTT    | miRNA | miR-21     |
| t0080796 | 23 | 1 TAGCTTATCAGAATGATGTTGAC     | miRNA | miR-21     |
| t0081247 | 20 | 1 ACTGTAGTATGGGCAATTTT        | miRNA | miR-20b*   |
| t0082408 | 22 | 1 TACTGTAGTATGGGCAATTTT       | miRNA | miR-20b*   |
| t0083379 | 22 | 1 TACTGTAGTATGGGCACCTTTT      | miRNA | miR-20b*   |
| t0083819 | 23 | 1 CAAAGTGCTCACAGTGCAGGTAG     | miRNA | miR-20b    |
| t0084738 | 23 | 1 CAAGGTGCTCATAGTGCAGGTAG     | miRNA | miR-20b    |
| t0086961 | 24 | 1 CAAAGTGCTCATAGGGCAGGTAGT    | miRNA | miR-20b    |
| t0089702 | 24 | 1 CAAAGTGCTCATAGTGTAGGTAGA    | miRNA | miR-20b    |
| t0090039 | 23 | 1 CAAAGTGCTCATAGGGCAGGTAG     | miRNA | miR-20b    |
| t0090227 | 22 | 1 CAAAGTGCTCAAAGTGCAGGTA      | miRNA | miR-20b    |
| t0090245 | 23 | 1 CAAAGGGCTCATAGTGCAGGTAG     | miRNA | miR-20b    |
| t0091673 | 22 | 1 CAAAGTGCTCACAGTGCAGGTA      | miRNA | miR-20b    |
| t0092975 | 23 | 1 CAAAGTGCTCATAGTGCAGGAAG     | miRNA | miR-20b    |
| t0093005 | 25 | 1 TAGAATGTAAGGAAGTGTGTGGATC   | miRNA | miR-206    |
| t0045570 | 25 | 1 TGGAATGTAAGGAAGTGTATGGATC   | miRNA | miR-206    |
| t0048066 | 25 | 1 TGGAATGTAAGGAAGTGTGTGGGTC   | miRNA | miR-206    |
| t0053258 | 25 | 1 TGAAATGTAAGGAAGTGTGTGGATC   | miRNA | miR-206    |
| t0040798 | 25 | 1 TGGAATGTAATGAAGTGGGTGGATC   | miRNA | miR-206    |
| t0042336 | 24 | 1 TGGAATGTAAGGAAGTGTGTGATT    | miRNA | miR-206    |
| t0044153 | 25 | 1 TGGAATGCAAGGAAGTGTGTGGATC   | miRNA | miR-206    |
| t0052103 | 25 | 1 TGGAATGTAAGGAAGTGCCTGGATC   | miRNA | miR-206    |
| t0053276 | 25 | 1 TGGAATGTAAGGAAGCGTGTGGATC   | miRNA | miR-206    |
| t0055737 | 25 | 1 TGGAATGTAAGGAAGTGAGTGGATC   | miRNA | miR-206    |
| t0071947 | 25 | 1 TGGAATGTAAGGAAGTGTGTGGCTC   | miRNA | miR-206    |
| t0078761 | 25 | 1 TGGAATGTAAGGGAGTGTGTGGATC   | miRNA | miR-206    |
| t0086335 | 25 | 1 AGGAATGTAAGGAAGTGTGTGGATC   | miRNA | miR-206    |
| t0042199 | 25 | 1 TGGAATGTAAGGCAGTGTGTGGATC   | miRNA | miR-206    |
| t0043818 | 25 | 1 TGAAATGTTTAGGACCACTAGTCTC   | miRNA | miR-203    |
| t0048330 | 21 | 1 TTCCTGTGCATATACTTCTTT       | miRNA | miR-202-5p |
| t0048905 | 22 | 1 TTTCTATGCTTATACTTCTTT       | miRNA | miR-202*   |



|          |    |                               |       |          |
|----------|----|-------------------------------|-------|----------|
| t0053004 | 26 | 1 TAATACTGCCGGGAAATGATGGAATC  | miRNA | miR-200c |
| t0057028 | 26 | 1 TAATACTGCCGGGTAATGATGGAATT  | miRNA | miR-200c |
| t0059145 | 27 | 1 TAATACTGCCTGGCAATGATGACTATC | miRNA | miR-200b |
| t0065172 | 23 | 1 TAAAGTGCTTATAGTCCAGGTAT     | miRNA | miR-20   |
| t0067160 | 23 | 1 TAGAGTGCTTATAGTGCAGGTAG     | miRNA | miR-20   |
| t0073823 | 21 | 1 TAAAGTGTTTATAGTGCAGGT       | miRNA | miR-20   |
| t0075442 | 23 | 1 TAAAGTGCTTATAGCGCAGGTAA     | miRNA | miR-20   |
| t0080720 | 24 | 1 TAAAGTGCTTATAGTGTAGGTAGA    | miRNA | miR-20   |
| t0084677 | 22 | 1 TAAAGTGATTATAGTGCAGGTA      | miRNA | miR-20   |
| t0092464 | 22 | 1 TATAGTGCTTATAGTGCAGGTA      | miRNA | miR-20   |
| t0058639 | 24 | 1 TAAAGTGCTTATAGTGAAGGTAGC    | miRNA | miR-20   |
| t0073654 | 23 | 1 TAAAGTGCTTATAGTGCAGGTAT     | miRNA | miR-20   |
| t0060952 | 24 | 1 TAGAGTGCTTATAGTGCAGGTAGA    | miRNA | miR-20   |
| t0065799 | 20 | 1 TAAAGTGCTTATAGGGCAGG        | miRNA | miR-20   |
| t0092115 | 22 | 1 TAAAGTGCCTATAGTGCAGGTA      | miRNA | miR-20   |
| t0079202 | 23 | 1 TAAAGGGCTTATAGTGCAGGTAA     | miRNA | miR-20   |
| t0041510 | 21 | 1 TAAAGTGCTTATAGGGCAGGT       | miRNA | miR-20   |
| t0041532 | 23 | 1 TAAAGTGCTTACAGTGCAGGTAA     | miRNA | miR-20   |
| t0042703 | 24 | 1 TAAAGTGCTTATAGAGCAGGTAGA    | miRNA | miR-20   |
| t0042822 | 23 | 1 TAAAGTGCTTATAGTGCAGGTCA     | miRNA | miR-20   |
| t0044217 | 22 | 1 TAAAGTGCTTATAGTGCAGGTC      | miRNA | miR-20   |
| t0050619 | 23 | 1 TAAAGTGCCTATAGTGCAGGTAA     | miRNA | miR-20   |
| t0050812 | 24 | 1 TAAAGTGCTTATAGGGCAGGTAGA    | miRNA | miR-20   |
| t0051658 | 22 | 1 TAAAGTGATTATAGTGCCGGTA      | miRNA | miR-20   |
| t0052295 | 24 | 1 TAAAGTGCTCATAGTGCAGGTAGA    | miRNA | miR-20   |
| t0055217 | 21 | 1 TAAAGTGCTTATAGTGCAGGG       | miRNA | miR-20   |
| t0058111 | 23 | 1 TAAAGTGCTTATAGTGCAGGTAA     | miRNA | miR-20   |
| t0059373 | 21 | 1 TAAAGTGCTTATACTGCAGGT       | miRNA | miR-20   |
| t0061046 | 23 | 1 TAAAGTGCTTATAGTGAAGGTAG     | miRNA | miR-20   |
| t0062794 | 21 | 1 TAAAGGGCTTATAGTGCAGGT       | miRNA | miR-20   |
| t0065619 | 22 | 1 TAAAGTGCTTATAGTGCCGGTA      | miRNA | miR-20   |
| t0068826 | 23 | 1 TAAAGTGCTTATAGTGCAGGTAG     | miRNA | miR-20   |
| t0068951 | 24 | 1 TAAAGGGCTTATAGTGCAGGTAGA    | miRNA | miR-20   |
| t0070557 | 25 | 1 TGGAATGTAAAGAAGTATGGGGATC   | miRNA | miR-1b   |
| t0075201 | 25 | 1 TGGAATGTAAAGAAGTATGTAAATC   | miRNA | miR-1a   |
| t0076082 | 25 | 1 TGGAATGTAAAGAAGTATGAACATC   | miRNA | miR-1a   |
| t0077099 | 25 | 1 TGGAATGTAAAGAAGTATGTACATC   | miRNA | miR-1a   |
| t0079067 | 23 | 1 TGGAATGTAAGGAAGTATGTATC     | miRNA | miR-1a   |
| t0081528 | 24 | 1 TGAATGTAAAGAAGTATGTATGTC    | miRNA | miR-1a   |
| t0084036 | 25 | 1 TGGAATGTAAAGAAGTATGAATATC   | miRNA | miR-1a   |
| t0084240 | 25 | 1 TGGAATGTAAAGAAGTATGTCCATC   | miRNA | miR-1a   |
| t0086733 | 23 | 1 TGGAATGTAAAGAAGTATGTTTC     | miRNA | miR-1a   |
| t0087928 | 25 | 1 TGGAATGTAAAGCAGTATGTACATC   | miRNA | miR-1a   |
| t0092094 | 25 | 1 TGGAATGTAAAGAAGTATATACATC   | miRNA | miR-1a   |
| t0092634 | 25 | 1 TGGAATATAAAGAAGTATGTACATC   | miRNA | miR-1a   |
| t0093479 | 25 | 1 TGGAATGTAAAGAAGTATGTCTATC   | miRNA | miR-1a   |
| t0045440 | 24 | 1 TGAATGTAAAGAAGAATGTATATC    | miRNA | miR-1a   |
| t0044162 | 25 | 1 TGGGATGTAAAGAAGTATGTACATC   | miRNA | miR-1a   |
| t0045891 | 23 | 1 TGGAATGTAAAGAAGGATGTATC     | miRNA | miR-1a   |
| t0050501 | 25 | 1 TGGAATGTAAAGAAGTATGCATATC   | miRNA | miR-1a   |
| t0054322 | 22 | 1 TGTGCAAAGCCATGCAAAACTG      | miRNA | miR-19b  |
| t0056307 | 23 | 1 TGTGAAAATCCATGCAAAACTGA     | miRNA | miR-19b  |
| t0061740 | 20 | 1 TGTGCAAATCCATGCAACAC        | miRNA | miR-19b  |
| t0064162 | 21 | 1 TGTGAAAATCCATGCAAAACT       | miRNA | miR-19b  |
| t0065703 | 22 | 1 TGCGCAAATCCATGCAAAACTG      | miRNA | miR-19b  |
| t0069337 | 21 | 1 TGTGCAAATCCATGCAACACT       | miRNA | miR-19b  |
| t0084156 | 21 | 1 TGCGCAAATCCATGCAAAACT       | miRNA | miR-19b  |
| t0088555 | 23 | 1 TGTGCAAATTTATGCAAAACTGA     | miRNA | miR-19a  |

|          |    |                             |       |             |
|----------|----|-----------------------------|-------|-------------|
| t0089882 | 21 | 1 ACAGTAGTCTGCACATTGGGT     | miRNA | miR-199-3p  |
| t0090417 | 23 | 1 TCCTGCTCTCCTTGCTGTAGTTT   | miRNA | miR-1976    |
| t0091897 | 22 | 1 TAGGTAGTTTCCTGTTGTTGGC    | miRNA | miR-196b    |
| t0091947 | 22 | 1 TAGGCAGTTTCCTGTTGTCCGA    | miRNA | miR-196b    |
| t0092310 | 25 | 1 TAGGAAGTTTCCTGTTGTTGGGATC | miRNA | miR-196b    |
| t0042302 | 21 | 1 TAGGAAGTTTCCTGTTGTTGG     | miRNA | miR-196b    |
| t0048531 | 24 | 1 TAGGTAGTTTCATGTTGTTGGCTC  | miRNA | miR-196a    |
| t0053782 | 19 | 1 TGAGGTAGCTTGTATAGTT       | miRNA | miR-1961    |
| t0076129 | 18 | 1 TAAGGTAGATTGTATAGT        | miRNA | miR-1961    |
| t0079095 | 19 | 1 TGAAGTAGTTGTATAGTT        | miRNA | miR-1961    |
| t0080387 | 20 | 1 TAGCAGAACATAAATATTGG      | miRNA | miR-195     |
| t0080961 | 22 | 1 TAGAAGCACATAAATATTGGCG    | miRNA | miR-195     |
| t0054263 | 22 | 1 TAGCAGCACATAAATACTGGCA    | miRNA | miR-195     |
| t0078489 | 21 | 1 TAGCAGCACATAAATATTGGA     | miRNA | miR-195     |
| t0045287 | 22 | 1 TAGCAGCACATAAATATTGCCA    | miRNA | miR-195     |
| t0042050 | 21 | 1 TAGCAGCACATAAATATTGCG     | miRNA | miR-195     |
| t0046391 | 23 | 1 TGTAACGGCAACTCCATGTGGAA   | miRNA | miR-194     |
| t0053393 | 23 | 1 TGTAACAGCAACTCCATGGGGAA   | miRNA | miR-194     |
| t0069010 | 23 | 1 TGTAACAGCAACTCCATGCGGAA   | miRNA | miR-194     |
| t0093431 | 23 | 1 TGTAACAGAACTCCATGTGGAA    | miRNA | miR-194     |
| t0052380 | 23 | 1 TGTAACAGCAACTCCATGTGGAA   | miRNA | miR-194     |
| t0054528 | 23 | 1 TGTAACAGCAACTCCATGAGGAA   | miRNA | miR-194     |
| t0065606 | 23 | 1 TGTAACAGTAACTCCATGTGGAA   | miRNA | miR-194     |
| t0046044 | 23 | 1 TATAACAGCAACTCCATGTGGAA   | miRNA | miR-194     |
| t0047884 | 23 | 1 TGAAACAGCAACTCCATGTGGAA   | miRNA | miR-194     |
| t0050864 | 22 | 1 TGGGACTTTGCGGGCGAGATGA    | miRNA | miR-193a-5p |
| t0055809 | 22 | 1 TGGGTCTTTGCGGGCGAGTTGA    | miRNA | miR-193a-5p |
| t0075377 | 22 | 1 TGGGTCTTTGCGGGCGCGATGA    | miRNA | miR-193a-5p |
| t0091974 | 21 | 1 TGGGTCTTTGAGGCGAGATG      | miRNA | miR-193a-5p |
| t0040736 | 21 | 1 CTGACCTATGAATTTACAGCC     | miRNA | miR-192     |
| t0045893 | 21 | 1 CTGACCTATGAATTGACAGCC     | miRNA | miR-192     |
| t0059211 | 21 | 1 TGACCTATGAATTGGCAGCCA     | miRNA | miR-192     |
| t0076951 | 21 | 1 CTGACCTATGAATTGACTGCA     | miRNA | miR-192     |
| t0078526 | 21 | 1 CTGACCCATGAATTGACAGCC     | miRNA | miR-192     |
| t0081867 | 21 | 1 CTGACCTATGAATTGAGAGCC     | miRNA | miR-192     |
| t0083304 | 23 | 1 TGACCTATGAATTGACACCCAGT   | miRNA | miR-192     |
| t0092297 | 21 | 1 CTGGCCTATGAATTGACAGCT     | miRNA | miR-192     |
| t0093490 | 21 | 1 CTGAACTATGAATTGACAGCC     | miRNA | miR-192     |
| t0052516 | 21 | 1 TGACCTACGAATTGACAGCCA     | miRNA | miR-192     |
| t0060147 | 23 | 1 CTGACCTATGAATTAACAGCATC   | miRNA | miR-192     |
| t0072061 | 22 | 1 CTGACCTATGAATTGACCGCCG    | miRNA | miR-192     |
| t0072190 | 20 | 1 CTGACTTATGAATTGACAGC      | miRNA | miR-192     |
| t0040666 | 25 | 1 CTGACCTATGAATTGACAACCAGAA | miRNA | miR-192     |
| t0040840 | 21 | 1 CTGACCTATGAATTGAAAGCA     | miRNA | miR-192     |
| t0041293 | 25 | 1 CTGACATATGAATTGACAGACAGAA | miRNA | miR-192     |
| t0041639 | 23 | 1 TGACCTATGAATTGACAGCCAGG   | miRNA | miR-192     |
| t0041745 | 21 | 1 AGACCTATGAATTGACAGCCA     | miRNA | miR-192     |
| t0042425 | 23 | 1 TGACCTATGAATTGACACCCAGA   | miRNA | miR-192     |
| t0042695 | 23 | 1 TGACCTACGAATTGACAGCCAGA   | miRNA | miR-192     |
| t0042980 | 21 | 1 CTGATCTATGAATTGACAGCA     | miRNA | miR-192     |
| t0044251 | 21 | 1 TGACCTATGAATTGACAGCTC     | miRNA | miR-192     |
| t0044499 | 20 | 1 TGACCTATAAATTGACAGCC      | miRNA | miR-192     |
| t0045049 | 21 | 1 GGACCTATGAATTGACAGCCA     | miRNA | miR-192     |
| t0045393 | 22 | 1 CTGACCTATGAATTGACGGCCA    | miRNA | miR-192     |
| t0045759 | 22 | 1 TGACCTATGAATTGACAGCGAG    | miRNA | miR-192     |
| t0046159 | 22 | 1 CTGACCTAAGAATTGACAGCCA    | miRNA | miR-192     |
| t0046178 | 20 | 1 CTGACCTATGAATCGACAGC      | miRNA | miR-192     |
| t0046267 | 20 | 1 TGACCTATGCATTGACAGCC      | miRNA | miR-192     |

|          |    |                             |       |         |
|----------|----|-----------------------------|-------|---------|
| t0046768 | 22 | 1 TGACCTATGAATTGACACCCAG    | miRNA | miR-192 |
| t0046822 | 21 | 1 TGACCTATGGATTGACAGCTA     | miRNA | miR-192 |
| t0047984 | 20 | 1 AGACCTATGAATTGACAGCC      | miRNA | miR-192 |
| t0048277 | 24 | 1 TGACCTATGAATTGACAGCCAGCA  | miRNA | miR-192 |
| t0049016 | 24 | 1 CTGACCTATGAATTGACAGCCCTC  | miRNA | miR-192 |
| t0050944 | 24 | 1 TGAACCTATGAATTGACAGCCAGAA | miRNA | miR-192 |
| t0051164 | 21 | 1 TAACCTATGAATTGACAGCCA     | miRNA | miR-192 |
| t0051318 | 21 | 1 CTGACCAATGAATTGACAGCA     | miRNA | miR-192 |
| t0051439 | 23 | 1 TGACCTATGAAATGACAGCCAGT   | miRNA | miR-192 |
| t0051609 | 21 | 1 CTGGCCTATGAATTGACAGCC     | miRNA | miR-192 |
| t0052028 | 21 | 1 CTGACCTATGAATTGGCAGCA     | miRNA | miR-192 |
| t0052081 | 21 | 1 TGACCTATGAATTGACAGACA     | miRNA | miR-192 |
| t0052825 | 24 | 1 TGACCTATGAATTGACAGCAAGTA  | miRNA | miR-192 |
| t0053459 | 21 | 1 CCTGACCTCTGAATTGACAGC     | miRNA | miR-192 |
| t0054123 | 21 | 1 CTGAGCTATGAATTGACAGCC     | miRNA | miR-192 |
| t0054669 | 22 | 1 TGACCTATGAATTGAAAGCCAG    | miRNA | miR-192 |
| t0057140 | 20 | 1 TGACCTATGAATTAACAGCT      | miRNA | miR-192 |
| t0058792 | 21 | 1 CTGACCTATGATTTGACAGCC     | miRNA | miR-192 |
| t0058877 | 25 | 1 CTGACCTATGAATTGACAGCCCGTA | miRNA | miR-192 |
| t0059120 | 23 | 1 CTGACCTATGAATTGACCGCCAT   | miRNA | miR-192 |
| t0059194 | 21 | 1 CGACCTATGAATTGACAGCCA     | miRNA | miR-192 |
| t0059281 | 24 | 1 TGACCTATGAATTGACAGCCCGTA  | miRNA | miR-192 |
| t0059329 | 21 | 1 CTGACCTACGAATTGACAGCA     | miRNA | miR-192 |
| t0059824 | 20 | 1 CTGACCTATGAATTGCCAGC      | miRNA | miR-192 |
| t0060030 | 23 | 1 TGACCTATGAATTGACAGCAAGT   | miRNA | miR-192 |
| t0061424 | 20 | 1 TGACCTATGAATTGACACCC      | miRNA | miR-192 |
| t0061578 | 21 | 1 CAGACCTATGAATTGACAGCC     | miRNA | miR-192 |
| t0061814 | 20 | 1 CTGACCTATGAATTCACAGC      | miRNA | miR-192 |
| t0062509 | 21 | 1 CTGACCTATGAATTGACAACC     | miRNA | miR-192 |
| t0062609 | 23 | 1 TGACCTATGAATTGACAGACAGT   | miRNA | miR-192 |
| t0062839 | 23 | 1 TGAGCTATGAATTGACAGCCAGT   | miRNA | miR-192 |
| t0063127 | 23 | 1 TGACCTATGAATTGGCAGCCAGT   | miRNA | miR-192 |
| t0063344 | 21 | 1 TGACCTATGAACTGACAGCCA     | miRNA | miR-192 |
| t0063947 | 24 | 1 TGACCTATGAATTGACAGTCAAAA  | miRNA | miR-192 |
| t0064168 | 24 | 1 CTGACCTATGAACTGACAGCCAGT  | miRNA | miR-192 |
| t0064603 | 20 | 1 TGACCTATGAACTGACAGCC      | miRNA | miR-192 |
| t0064987 | 24 | 1 TGACCTATAAATTGACAGCCAGAT  | miRNA | miR-192 |
| t0065116 | 21 | 1 CTGACATATGAATTGACAGCC     | miRNA | miR-192 |
| t0065577 | 20 | 1 TTGACCTATGAATTGACAGC      | miRNA | miR-192 |
| t0065871 | 23 | 1 TGACCTATGAATTAACAGCCAGA   | miRNA | miR-192 |
| t0066119 | 22 | 1 CTGACCTATGAATTGAAAGCCA    | miRNA | miR-192 |
| t0066448 | 21 | 1 CTGACCTATGAAATGACAGCC     | miRNA | miR-192 |
| t0067121 | 21 | 1 CTGACCTATGAATTGACACCC     | miRNA | miR-192 |
| t0067225 | 23 | 1 TCACCTATGAATTGACAGCCAGA   | miRNA | miR-192 |
| t0067978 | 21 | 1 CTGACCTATGAGTTGACAGCC     | miRNA | miR-192 |
| t0069242 | 22 | 1 TCTGACCTATGAATTGAAAGCC    | miRNA | miR-192 |
| t0069522 | 23 | 1 CGACCTATGAATTGACAGCCAGT   | miRNA | miR-192 |
| t0070201 | 21 | 1 TGACCTATGAATTGAAAGCCA     | miRNA | miR-192 |
| t0070634 | 23 | 1 CTAACCTATGAATTGACAGCCAT   | miRNA | miR-192 |
| t0071225 | 21 | 1 CTCACCTATGAATTGACAGCA     | miRNA | miR-192 |
| t0071446 | 22 | 1 CTGACCTATGAATTGAAAGACA    | miRNA | miR-192 |
| t0071761 | 22 | 1 CTGACCTATGAATTAACAGCCG    | miRNA | miR-192 |
| t0072093 | 25 | 1 CTGACCTATGAATTGACAGCCCGTG | miRNA | miR-192 |
| t0072328 | 22 | 1 CTGACCTCTGAATTGACAGCTA    | miRNA | miR-192 |
| t0072744 | 22 | 1 CTGACCTATGAATTGACAGGCA    | miRNA | miR-192 |
| t0072969 | 22 | 1 CTGACCTATGAATTAACAGCCA    | miRNA | miR-192 |
| t0074066 | 20 | 1 TGACCTATGAATTGACAGAA      | miRNA | miR-192 |
| t0074106 | 23 | 1 TGACCTATGAGTTGACAGCCAGA   | miRNA | miR-192 |

|          |    |                            |       |         |
|----------|----|----------------------------|-------|---------|
| t0074282 | 21 | 1 CTGACCTATGAATTGATAGCC    | miRNA | miR-192 |
| t0075009 | 20 | 1 CTGACCTATGAATTGAAAGC     | miRNA | miR-192 |
| t0075074 | 22 | 1 CTGACCTATGAACTGACAGCCA   | miRNA | miR-192 |
| t0075150 | 21 | 1 CTGACCTATGAATTGACAGGG    | miRNA | miR-192 |
| t0075438 | 24 | 1 CTGACCTACGAATTGACAGCCAGT | miRNA | miR-192 |
| t0075883 | 20 | 1 CTGACCTATGAATTGACGGC     | miRNA | miR-192 |
| t0076159 | 21 | 1 CTGAGCTACGAATTGACAGCC    | miRNA | miR-192 |
| t0076366 | 21 | 1 CTGACCTATGAATTGCCCGCC    | miRNA | miR-192 |
| t0077982 | 20 | 1 ATGACCTATGAATTGACAGC     | miRNA | miR-192 |
| t0079119 | 23 | 1 TGACCTATGAATTGACGGCCAGG  | miRNA | miR-192 |
| t0079179 | 24 | 1 CTGACCTATGACTTGACAGCCAGT | miRNA | miR-192 |
| t0079519 | 21 | 1 CGACCTATGAATTGACAGCTA    | miRNA | miR-192 |
| t0079666 | 21 | 1 CTGACCTATGATTTGACAGCA    | miRNA | miR-192 |
| t0081308 | 20 | 1 TGACCTATGAATTGACCGTC     | miRNA | miR-192 |
| t0081761 | 20 | 1 TGACCTATGAATTGATCGCC     | miRNA | miR-192 |
| t0081980 | 22 | 1 TGACCTATGTATTGACAGCCAG   | miRNA | miR-192 |
| t0082400 | 20 | 1 TGACCTATGAATTGAAAGCT     | miRNA | miR-192 |
| t0082507 | 21 | 1 CTGACCTATGAATTGACAGAT    | miRNA | miR-192 |
| t0083381 | 23 | 1 TGACCTATGAATTGACAGCCGGT  | miRNA | miR-192 |
| t0083450 | 24 | 1 CTGACCTATGAATTCACAGCCAGT | miRNA | miR-192 |
| t0083577 | 21 | 1 CTGACCTATAAATTGACAGCT    | miRNA | miR-192 |
| t0083817 | 21 | 1 TAACCTATGAATTGACAGCTA    | miRNA | miR-192 |
| t0084480 | 22 | 1 CTGACCTATGAATTGACAGTCA   | miRNA | miR-192 |
| t0084560 | 24 | 1 TGACCTATGAATTAACAGCCAGTA | miRNA | miR-192 |
| t0084733 | 21 | 1 CTGACCTATGAAGTGACAGCC    | miRNA | miR-192 |
| t0084828 | 20 | 1 CTGACCTATGAATTGATAGC     | miRNA | miR-192 |
| t0085059 | 23 | 1 CTGACCTATGACTTGACAGCCAG  | miRNA | miR-192 |
| t0085536 | 20 | 1 TGACCTATCAATTGACAGCC     | miRNA | miR-192 |
| t0085772 | 20 | 1 TGACCTGTGAATTGACAGCC     | miRNA | miR-192 |
| t0086214 | 21 | 1 TGACCTGTGAATTGACAGCTA    | miRNA | miR-192 |
| t0086401 | 20 | 1 TGACCTATGAATTTACAGCC     | miRNA | miR-192 |
| t0086461 | 22 | 1 TGACCTATGAATTGACAGCCAT   | miRNA | miR-192 |
| t0086672 | 24 | 1 TGCCCTATGAATTGACAGCCAGAA | miRNA | miR-192 |
| t0087300 | 23 | 1 CAACGGAATCCCAAAATCAGCTG  | miRNA | miR-191 |
| t0088104 | 23 | 1 AACGGAATCTCAAAGCAGCTGT   | miRNA | miR-191 |
| t0088277 | 20 | 1 CAACGGGATCCCAAAAGCAG     | miRNA | miR-191 |
| t0089220 | 20 | 1 CAACGGAAACCCAAAAGCAG     | miRNA | miR-191 |
| t0089618 | 21 | 1 AACGGAATCCCAAAAGCAGCT    | miRNA | miR-191 |
| t0089881 | 23 | 1 AACGGAACCCCAAAAGCAGCTGA  | miRNA | miR-191 |
| t0089959 | 21 | 1 AACGGAATCCCAAAAGGAGCT    | miRNA | miR-191 |
| t0090226 | 23 | 1 AACGGAATCCCAAAAGAAGCTGT  | miRNA | miR-191 |
| t0090332 | 23 | 1 ACAACGGAATCCCAAAAGAAGCT  | miRNA | miR-191 |
| t0090343 | 20 | 1 CAACGGAATCCAAAAAGCAC     | miRNA | miR-191 |
| t0091379 | 24 | 1 CAACGGAATCCCACAAGCAGCTGT | miRNA | miR-191 |
| t0092288 | 23 | 1 CAACGTAATCCCAAAAGCAGCTG  | miRNA | miR-191 |
| t0092484 | 21 | 1 CAACGGAACCCCAAAAGCAGC    | miRNA | miR-191 |
| t0040880 | 21 | 1 CAACGGAATCCCAAAATCAGC    | miRNA | miR-191 |
| t0041350 | 21 | 1 AACGGAATCCCAAACGCAGCT    | miRNA | miR-191 |
| t0041739 | 23 | 1 CAACGGAATCCAAAAAGAAGCTG  | miRNA | miR-191 |
| t0041866 | 24 | 1 CAACGGAATCCCAAAAACAGCTGT | miRNA | miR-191 |
| t0041914 | 22 | 1 AACGGAATCCCAAAAGAAGCAG   | miRNA | miR-191 |
| t0042112 | 21 | 1 ACGGAATCCCAAAAGCAGCTG    | miRNA | miR-191 |
| t0042635 | 22 | 1 CCACGGAATCCCAAAAGAAGCT   | miRNA | miR-191 |
| t0043005 | 22 | 1 CAACGGAGTCCCGAAAGCAGCT   | miRNA | miR-191 |
| t0043381 | 19 | 1 CAACGGAATCCCACAAGCA      | miRNA | miR-191 |
| t0043561 | 22 | 1 AACCGAATCCCAAAAGCAGCTG   | miRNA | miR-191 |
| t0043721 | 24 | 1 CAACGGCATCCCAAAAGCAGCTGT | miRNA | miR-191 |
| t0043750 | 22 | 1 CAAAGGAATCCCAAAAGAAGCT   | miRNA | miR-191 |

|          |    |                              |       |         |
|----------|----|------------------------------|-------|---------|
| t0044332 | 23 | 1 AACCGAATCCCAAAAGCAGCTGA    | miRNA | miR-191 |
| t0044485 | 22 | 1 AACGGAATCCCGAAAAGCAGCTG    | miRNA | miR-191 |
| t0044523 | 22 | 1 AAGGGAATCCCAAAAGCAGCTG     | miRNA | miR-191 |
| t0045061 | 20 | 1 CACCGGAATCCCAAAAGCAG       | miRNA | miR-191 |
| t0045704 | 22 | 1 CAACGGAATCCAAAAAGCCGCT     | miRNA | miR-191 |
| t0045843 | 22 | 1 AACGGAATCCCAAAAGCGGCTG     | miRNA | miR-191 |
| t0045976 | 21 | 1 AACGGAATCCCAAAAACAGCT      | miRNA | miR-191 |
| t0046189 | 24 | 1 CAACGGAATCCAAAAAGCAGCTGT   | miRNA | miR-191 |
| t0046331 | 24 | 1 CAACGGAATCCCAAAAGCAGCCGT   | miRNA | miR-191 |
| t0046352 | 23 | 1 CAACGGAATCCCAAAAGCATCTG    | miRNA | miR-191 |
| t0046878 | 24 | 1 CAACGGAATCCCAAAAGCGGCTGA   | miRNA | miR-191 |
| t0046913 | 22 | 1 AACGGAATCCCAAAAGCAGCAG     | miRNA | miR-191 |
| t0046916 | 22 | 1 AACGGAATTCCAAAAGCCGCTG     | miRNA | miR-191 |
| t0047282 | 24 | 1 CAACGGAATACCAAAAGCAGCTGT   | miRNA | miR-191 |
| t0047413 | 20 | 1 CAACGGAATCCCAAACGCAG       | miRNA | miR-191 |
| t0047464 | 24 | 1 CAACGGAATGCCAAAAGCAGCTGA   | miRNA | miR-191 |
| t0047883 | 22 | 1 AACGGAATCCCAAATGCAGCTG     | miRNA | miR-191 |
| t0048311 | 21 | 1 AACGGAATCCCAAAAGCAGGT      | miRNA | miR-191 |
| t0048527 | 21 | 1 CCACGGAATCCCAAAAGCAGC      | miRNA | miR-191 |
| t0048690 | 20 | 1 AAAGGAATCCCAAAAGCAGC       | miRNA | miR-191 |
| t0048791 | 22 | 1 CAACGGAATACCAAAAGAAGCT     | miRNA | miR-191 |
| t0049022 | 22 | 1 AACGGAGTCCCAAAAGCAGCTG     | miRNA | miR-191 |
| t0049274 | 21 | 1 AACGGAATCCCAAGAGCAGGT      | miRNA | miR-191 |
| t0049457 | 23 | 1 CAACGGAATCGCAAAAGCAGCTG    | miRNA | miR-191 |
| t0049590 | 21 | 1 CAAAGGAATCCCAAAAGCAGA      | miRNA | miR-191 |
| t0049820 | 22 | 1 CAATGGAATCCTAAAAGCAGCT     | miRNA | miR-191 |
| t0049887 | 22 | 1 CAAAGGAATCACAAAAGCAGCT     | miRNA | miR-191 |
| t0050215 | 23 | 1 AACGGAATCCCAGAAAGCAGCTGA   | miRNA | miR-191 |
| t0050562 | 22 | 1 AACGGAATCCCACAAGCAGCTG     | miRNA | miR-191 |
| t0051096 | 22 | 1 AACGGACTCCCAAAAGCAGCTG     | miRNA | miR-191 |
| t0051448 | 24 | 1 CAACGGAATCCCAATAGCAGCTGT   | miRNA | miR-191 |
| t0051470 | 24 | 1 CAAGGGAATCCCAAAAGCAGCTGA   | miRNA | miR-191 |
| t0051548 | 24 | 1 CAACGGAATCCCAAAAGCAGTTGA   | miRNA | miR-191 |
| t0051567 | 26 | 1 CAACGGACTCCCAAAAGCAGCATAAA | miRNA | miR-191 |
| t0051847 | 22 | 1 AACGGCATCCCAAAAGCAGCTG     | miRNA | miR-191 |
| t0051852 | 23 | 1 AACAGAATCCCAAAAGCAGCTGA    | miRNA | miR-191 |
| t0051889 | 22 | 1 AACGGAATTCCAAAAGCAGATG     | miRNA | miR-191 |
| t0052473 | 22 | 1 CAACGGAATCCTAAAAGAAGCT     | miRNA | miR-191 |
| t0052872 | 23 | 1 CAACGGAATCCCAAAAGAAGCTT    | miRNA | miR-191 |
| t0053099 | 21 | 1 CAACGGAATCCCGAAAGCAGC      | miRNA | miR-191 |
| t0053466 | 21 | 1 AACGGAATCGCAAAAGCAGCT      | miRNA | miR-191 |
| t0053723 | 23 | 1 CAACGGAATCCCAAAAGCAGGTG    | miRNA | miR-191 |
| t0053836 | 20 | 1 CAATGGAATCCCAAAAGCAG       | miRNA | miR-191 |
| t0053898 | 22 | 1 CAACGGACTCCCAAAAGCAGTT     | miRNA | miR-191 |
| t0054711 | 19 | 1 CAACGGAATTCTAAAAGCA        | miRNA | miR-191 |
| t0054760 | 23 | 1 CAACGGAATCCCAAAAGCAGACG    | miRNA | miR-191 |
| t0054820 | 22 | 1 AACGGAATCTCAAAAGTAGCTG     | miRNA | miR-191 |
| t0054847 | 22 | 1 AAACGGAATCCAAAAAGCAGCT     | miRNA | miR-191 |
| t0054912 | 24 | 1 CAACGGAATCCCAAAAGCAGTTGT   | miRNA | miR-191 |
| t0054937 | 20 | 1 AACGGAATCCCAAGAGCAGC       | miRNA | miR-191 |
| t0055094 | 22 | 1 AACGGAATGCCAAAAGCAGCTG     | miRNA | miR-191 |
| t0055688 | 24 | 1 CAACGGGATCCCAAAAGCAGCTGT   | miRNA | miR-191 |
| t0055866 | 22 | 1 AACGGAATCCCAGAAAGCAGCTG    | miRNA | miR-191 |
| t0056146 | 22 | 1 AACGGAATCCCAAAAACAGCTG     | miRNA | miR-191 |
| t0056300 | 22 | 1 CAACGGAATGCCAAAAGCAGCT     | miRNA | miR-191 |
| t0056341 | 21 | 1 CAACGGAATCCCAAAAAGAAGA     | miRNA | miR-191 |
| t0056357 | 24 | 1 CAACGAAATCCCAAAAGCAGCTAA   | miRNA | miR-191 |
| t0056402 | 23 | 1 CAACGGAATCCCAAAAGGAGCTG    | miRNA | miR-191 |

|          |    |                             |       |         |
|----------|----|-----------------------------|-------|---------|
| t0056407 | 21 | 1 CAACGGAATCCCAAAAGCAAC     | miRNA | miR-191 |
| t0056723 | 19 | 1 CAACGGAATCCCAGAAGCA       | miRNA | miR-191 |
| t0056911 | 24 | 1 CAACGGAATCCCAAAAGCCGCTGT  | miRNA | miR-191 |
| t0057043 | 20 | 1 CAACGGAATCCCAAAAGTAG      | miRNA | miR-191 |
| t0057385 | 20 | 1 AACGGAATACCCAAAGCAGC      | miRNA | miR-191 |
| t0057750 | 24 | 1 AACGGAATCCCAAAAGAAGCTGAA  | miRNA | miR-191 |
| t0057986 | 21 | 1 AACGGAATACCAAAAGCAGCT     | miRNA | miR-191 |
| t0058462 | 20 | 1 CAACGGAATTCCAAAAGAAG      | miRNA | miR-191 |
| t0060132 | 19 | 1 CAACGGAATTGCAAAAGCA       | miRNA | miR-191 |
| t0060168 | 23 | 1 CGACGGAATCTCAAAGCAGCTG    | miRNA | miR-191 |
| t0060327 | 22 | 1 AACGGAATCCCAAAAGAAGCTT    | miRNA | miR-191 |
| t0060639 | 24 | 1 AAACGGAATCCCAAAAGCAGCTGA  | miRNA | miR-191 |
| t0061387 | 22 | 1 CAACGGAATCCAAAAGCAGAT     | miRNA | miR-191 |
| t0061630 | 21 | 1 CAACAGAATCCCAAAAGCAGC     | miRNA | miR-191 |
| t0063776 | 23 | 1 CAACGGAATCCCAACAGCAGCTG   | miRNA | miR-191 |
| t0064165 | 24 | 1 AAACGGAATCCCAAAAGCAGCTGT  | miRNA | miR-191 |
| t0065104 | 22 | 1 CAACGGAATCCCAAAAGAAGCA    | miRNA | miR-191 |
| t0065229 | 24 | 1 CAACGGAATCCCAAAAGCAGCTGC  | miRNA | miR-191 |
| t0065380 | 22 | 1 AACGAAATCCCAAAAGCAGCTG    | miRNA | miR-191 |
| t0065616 | 23 | 1 AACGGAATTCCAAAAGCAGCTGA   | miRNA | miR-191 |
| t0066186 | 22 | 1 CAACGGAATCCCAAAAGCAGAG    | miRNA | miR-191 |
| t0066314 | 24 | 1 CAACGGAATCCTAAAAGCAGCTGA  | miRNA | miR-191 |
| t0066317 | 21 | 1 AACGGAATCCCAAAAGCAGAT     | miRNA | miR-191 |
| t0066779 | 19 | 1 CAACGGAATACCAAAAGCA       | miRNA | miR-191 |
| t0066980 | 20 | 1 CAACGGAATCCCGAAAGCAG      | miRNA | miR-191 |
| t0067298 | 22 | 1 AACGGAATCCCAAAAGGAGCTG    | miRNA | miR-191 |
| t0067628 | 24 | 1 CACCGGAATCCCAAAAGCAGCTGT  | miRNA | miR-191 |
| t0067671 | 24 | 1 CAACGGAATCTCAAAGCAGCCGA   | miRNA | miR-191 |
| t0067822 | 23 | 1 AACGGAATCCCAAAAGCAGCTGG   | miRNA | miR-191 |
| t0068022 | 23 | 1 GAACGGAATCCCAAAAGCAGCTG   | miRNA | miR-191 |
| t0068025 | 24 | 1 CATCGGAATCCCAAAAGCAGCTGA  | miRNA | miR-191 |
| t0068153 | 22 | 1 AACGGAATCCCAAAAGGAGCTC    | miRNA | miR-191 |
| t0068166 | 21 | 1 AACGCAATCCCAAAAGCAGCT     | miRNA | miR-191 |
| t0068423 | 23 | 1 AACGCAATCCCAAAAGCAGCTGA   | miRNA | miR-191 |
| t0068945 | 21 | 1 AACGGCATCCCAAAAGCAGCT     | miRNA | miR-191 |
| t0069092 | 20 | 1 CAACGGAACCCCAAAAGCAG      | miRNA | miR-191 |
| t0069475 | 24 | 1 CAACGGAATACAAAAGCAGCTGT   | miRNA | miR-191 |
| t0070195 | 25 | 1 CAACGGAATCCCAAAACCAGCTGTG | miRNA | miR-191 |
| t0070328 | 20 | 1 CAACGGAATCCCACAAGCAG      | miRNA | miR-191 |
| t0070371 | 22 | 1 CAACGGAATCCCAATAGCAGCT    | miRNA | miR-191 |
| t0070373 | 24 | 1 CAACGGAATCCCAAAAGGAGCTGA  | miRNA | miR-191 |
| t0070749 | 24 | 1 CAATGGAATCCCAAAAGCAGCTGT  | miRNA | miR-191 |
| t0072168 | 22 | 1 CATCGGAATCCTAAAAGCAGCT    | miRNA | miR-191 |
| t0072567 | 22 | 1 CAACAGAATCCAAAAGCAGCT     | miRNA | miR-191 |
| t0072691 | 22 | 1 CAACGGAATCCCAAACGAAGCT    | miRNA | miR-191 |
| t0072953 | 22 | 1 TACCGGAATCCCAAAAGCAGCT    | miRNA | miR-191 |
| t0073000 | 21 | 1 CAACGGAATCCCAAAAGCAGC     | miRNA | miR-191 |
| t0073036 | 20 | 1 CAACGCAATCCCAAAAGCAG      | miRNA | miR-191 |
| t0073214 | 24 | 1 CAAAGGAATCCCAAAAGCAGCTGA  | miRNA | miR-191 |
| t0073425 | 23 | 1 CAACGGAATCTCAAGAGCAGCTG   | miRNA | miR-191 |
| t0073459 | 23 | 1 CAACGGAATTCCACAAGCAGCTG   | miRNA | miR-191 |
| t0073918 | 22 | 1 CAACGGAATACCAAAAGCAACT    | miRNA | miR-191 |
| t0074149 | 22 | 1 CAACGGACTCCCAAAAGCCGCT    | miRNA | miR-191 |
| t0074665 | 23 | 1 AACGGAATCCCAAAAGCAGCTGC   | miRNA | miR-191 |
| t0074962 | 19 | 1 CAACAGAATCCAAAAGCA        | miRNA | miR-191 |
| t0075041 | 21 | 1 CAGCGGAATCCCAAAAGCAGC     | miRNA | miR-191 |
| t0075070 | 22 | 1 CAACCGAATCCCAAAAGCAGCT    | miRNA | miR-191 |
| t0075481 | 22 | 1 CAACTGAATCCCAAAAGCAGCT    | miRNA | miR-191 |

|          |    |                             |       |          |
|----------|----|-----------------------------|-------|----------|
| t0075690 | 21 | 1 CAACGGAATCCCAAACGCAGC     | miRNA | miR-191  |
| t0075987 | 24 | 1 CAACGGAATCACAAAAGCAGCTGT  | miRNA | miR-191  |
| t0076285 | 21 | 1 AACAGAATCCCAAAGCAGCT      | miRNA | miR-191  |
| t0076666 | 23 | 1 CAACGGAATCCTAAAAGCAGCTT   | miRNA | miR-191  |
| t0076736 | 22 | 1 TAACGGAATCCCAAAGCAGTT     | miRNA | miR-191  |
| t0076971 | 22 | 1 AACTGAATCCCAAAGCAGCTG     | miRNA | miR-191  |
| t0078064 | 22 | 1 CACGGAATCCCAAAGCAGCTG     | miRNA | miR-191  |
| t0078191 | 24 | 1 CAACGGAATCCAAAAGCAGCTGA   | miRNA | miR-191  |
| t0078341 | 22 | 1 AAACGGAATACCAAAGCAGCT     | miRNA | miR-191  |
| t0078541 | 22 | 1 AACGGAATCCCAAAGCAGCCG     | miRNA | miR-191  |
| t0078834 | 20 | 1 CAACGGAATCTCAAAGCAG       | miRNA | miR-191  |
| t0078911 | 20 | 1 CAACGGAATCGCAAAGCAG       | miRNA | miR-191  |
| t0079104 | 22 | 1 CAACGGAATCCCAAAGACGCT     | miRNA | miR-191  |
| t0079895 | 22 | 1 CAACGTAATCCCAAAGAAGCT     | miRNA | miR-191  |
| t0080040 | 19 | 1 CCACGGAATTCCAAAAGCA       | miRNA | miR-191  |
| t0080275 | 22 | 1 CTACGGAATCCCAAAGCAGCT     | miRNA | miR-191  |
| t0080825 | 20 | 1 CAACGGAATCCTAAAAGCAG      | miRNA | miR-191  |
| t0081023 | 22 | 1 ATCGGAATCCCAAAGCAGCTG     | miRNA | miR-191  |
| t0081166 | 24 | 1 CAACGGAATCCCAAAGCAGCTGA   | miRNA | miR-191  |
| t0081257 | 21 | 1 AACGGAATCCAGAAAGCAGCT     | miRNA | miR-191  |
| t0081467 | 21 | 1 AACGGAATCCCAAAGCGGCT      | miRNA | miR-191  |
| t0081705 | 26 | 1 CAACGGAATCCCAAAGAAGCTGATC | miRNA | miR-191  |
| t0082130 | 24 | 1 CAACGGAACCCCAAAGCAGCTGA   | miRNA | miR-191  |
| t0082428 | 24 | 1 CAACGGACTCCCAAAGCAGCTGA   | miRNA | miR-191  |
| t0082560 | 20 | 1 AACGGAATCCCAAAGCCGC       | miRNA | miR-191  |
| t0082821 | 21 | 1 AACGGAATCCCGAAAGCAGCT     | miRNA | miR-191  |
| t0082941 | 21 | 1 CAACGGAATACCAAAGCAGA      | miRNA | miR-191  |
| t0082956 | 19 | 1 CAACGGAATCCCAAAGCC        | miRNA | miR-191  |
| t0083047 | 23 | 1 AACGGAATCCAAAAGCAGCTGA    | miRNA | miR-191  |
| t0083330 | 24 | 1 TAACGGAATCCCAAAGCAGCTGA   | miRNA | miR-191  |
| t0083606 | 24 | 1 CAACGCAATCTCAAAGCAGCTGA   | miRNA | miR-191  |
| t0083887 | 22 | 1 AACGGAATCTCAAAGAAGCTG     | miRNA | miR-191  |
| t0084630 | 24 | 1 CAACGGAATCCCAAAGACGCTGA   | miRNA | miR-191  |
| t0084751 | 24 | 1 CAACGGAATCCCAAAGCAGCTGG   | miRNA | miR-191  |
| t0085341 | 24 | 1 CAACGGAATCCAAAAGTAGCTGT   | miRNA | miR-191  |
| t0085409 | 24 | 1 CAACGGAATCCCAAAGCCGCTGA   | miRNA | miR-191  |
| t0085578 | 19 | 1 AACGGAATCCCAAAGCAG        | miRNA | miR-191  |
| t0085595 | 23 | 1 CAACGGTATCCCAAAGCAGCTG    | miRNA | miR-191  |
| t0086034 | 24 | 1 CAACGGAATTCCAAAAGAAGCTGT  | miRNA | miR-191  |
| t0086147 | 24 | 1 CGACGGAATCCCAAAGCAGCTGT   | miRNA | miR-191  |
| t0086543 | 22 | 1 CAACGGATTCCCAAAGCAGCT     | miRNA | miR-191  |
| t0086677 | 23 | 1 GACGGAATCCCAAAGCAGCTGA    | miRNA | miR-191  |
| t0086851 | 23 | 1 AACGGAATCCCAAAGCCGCTGT    | miRNA | miR-191  |
| t0086898 | 24 | 1 CAACAGAATCCCAAAGCAGCTGT   | miRNA | miR-191  |
| t0087193 | 23 | 1 AACGGAATCCCAAACGCAGCTGA   | miRNA | miR-191  |
| t0087245 | 21 | 1 AACGGAATCCCAAATGCAGCT     | miRNA | miR-191  |
| t0087502 | 24 | 1 CAACGGAATCCCAAAGCAGATGT   | miRNA | miR-191  |
| t0087594 | 22 | 1 CAACAGAATCACAAAAGCAGCT    | miRNA | miR-191  |
| t0087777 | 22 | 1 AACGGAATCCCAAACGCAGCTG    | miRNA | miR-191  |
| t0087871 | 19 | 1 AACGGAATCCCAAAGTAG        | miRNA | miR-191  |
| t0088724 | 21 | 1 AACGGAATCCACAAGCAGCT      | miRNA | miR-191  |
| t0088783 | 22 | 1 AGCGGAATCCCAAAGCAGCTG     | miRNA | miR-191  |
| t0088931 | 24 | 1 CAACGGAATCCTAAAAGCAGCTGT  | miRNA | miR-191  |
| t0088988 | 19 | 1 CAACGGAATCCCAAACGCA       | miRNA | miR-191  |
| t0089192 | 22 | 1 AACGGAATCCAAAAGCAGCTG     | miRNA | miR-191  |
| t0089394 | 23 | 1 CAAAGGAATCCCAAAGCAGCTT    | miRNA | miR-191  |
| t0089758 | 22 | 1 AACGGAATCCCAAAGCAGCGG     | miRNA | miR-191  |
| t0089768 | 21 | 1 CGGCGGGGACGGCGACTGGTC     | miRNA | miR-1908 |

|          |    |                            |       |            |
|----------|----|----------------------------|-------|------------|
| t0090538 | 23 | 1 CAGTGACCAGACATATCCCTTTT  | miRNA | miR-190-3p |
| t0091079 | 21 | 1 TAAGGTGCATCTAGTGGAGTT    | miRNA | miR-18b    |
| t0091201 | 22 | 1 TAAGGTGCATCTAGTGCCGTTA   | miRNA | miR-18b    |
| t0091267 | 22 | 1 TAAGGGGCATCTAGTGCAGTTA   | miRNA | miR-18b    |
| t0091866 | 21 | 1 TAAGGTGCATCTAGGGGAGTT    | miRNA | miR-18b    |
| t0092382 | 21 | 1 ACTGCCCTAAGTGCTCCTTCT    | miRNA | miR-18a*   |
| t0092386 | 21 | 1 TAAGGTGCATCTAGAGCAGAT    | miRNA | miR-18a    |
| t0092999 | 20 | 1 TAAGGTGCATCTAGTGC GGA    | miRNA | miR-18a    |
| t0093253 | 21 | 1 TAAGGTGCATCTAGTACAGAT    | miRNA | miR-18a    |
| t0093287 | 22 | 1 CAAAGAATTCTACTTTTGGGCT   | miRNA | miR-186    |
| t0093323 | 21 | 1 CCAAAGAATTCTCCTTTTCGGG   | miRNA | miR-186    |
| t0093496 | 20 | 1 CAAAGAATTCTCCTTTTGAA     | miRNA | miR-186    |
| t0069600 | 20 | 1 CAAAGAATTATCCTTTTGGA     | miRNA | miR-186    |
| t0077681 | 20 | 1 TAAAGAATTCTCCTTTTGGG     | miRNA | miR-186    |
| t0042632 | 19 | 1 CAAAGAATTCTCCTTTTGG      | miRNA | miR-186    |
| t0048513 | 22 | 1 CAGGGGCCGGCTTTCCTCTGGT   | miRNA | miR-185*   |
| t0069319 | 18 | 1 AGCAGGGGCTGGCTTTAC       | miRNA | miR-185*   |
| t0077414 | 21 | 1 AGGGGCTGGCTTTACTCTGGT    | miRNA | miR-185*   |
| t0090540 | 21 | 1 AGGGGCTGGATTTCTCTGGT     | miRNA | miR-185*   |
| t0062768 | 20 | 1 AGGGGCTGGCTTTTATCTGG     | miRNA | miR-185*   |
| t0064675 | 21 | 1 AGGGGCTGGCTTTCCTCCGGT    | miRNA | miR-185*   |
| t0072804 | 21 | 1 GGGGGCTGGCTTTCCTCTGGT    | miRNA | miR-185*   |
| t0049253 | 21 | 1 TGGAGAGAGAGGCATTTCTG     | miRNA | miR-185    |
| t0051454 | 21 | 1 GGAGAGAAAGGCAGTTACTGA    | miRNA | miR-185    |
| t0052775 | 23 | 1 CTGGAGGGAAAGGCAGTTCCTGA  | miRNA | miR-185    |
| t0057041 | 23 | 1 TGGAGAGACAGGCAGTTCCTGAT  | miRNA | miR-185    |
| t0069723 | 22 | 1 TGGAGAGAAAGGCAGTTCCTAA   | miRNA | miR-185    |
| t0083568 | 22 | 1 TGGAGCGAAAGGAAGTTCCTGA   | miRNA | miR-185    |
| t0049952 | 22 | 1 TGGAGAGAAAGGTAGTTCCTGA   | miRNA | miR-185    |
| t0050945 | 23 | 1 TGGAGAGAAAGGAAGTTCCTGAT  | miRNA | miR-185    |
| t0053138 | 22 | 1 TGGAGTGAAAGGCAGTTCCTGG   | miRNA | miR-185    |
| t0063662 | 21 | 1 TGGGGTGAAAGGCAGTTCCTG    | miRNA | miR-185    |
| t0080189 | 22 | 1 TGGAGATAAAGGCAGTTCCTGA   | miRNA | miR-185    |
| t0084258 | 23 | 1 TCGAGAGAAAGGCCGTTCTGAG   | miRNA | miR-185    |
| t0092637 | 24 | 1 TGGAGAGAAAGGGAGTTCCTGAAA | miRNA | miR-185    |
| t0040665 | 22 | 1 TGGAGAGAAAGGCTGTTTCATGA  | miRNA | miR-185    |
| t0041228 | 22 | 1 TGGAGAGAAAGGCAGTTCCTCT   | miRNA | miR-185    |
| t0041389 | 23 | 1 TGGAGAGAAAGGCAGTTCAGGAA  | miRNA | miR-185    |
| t0041768 | 24 | 1 TGGAGAGAAAGGCAGTTCCTGAAA | miRNA | miR-185    |
| t0041921 | 19 | 1 TGGAGGGAAAGGCAGTTCC      | miRNA | miR-185    |
| t0041939 | 22 | 1 TGGAGCGTAAGGCAGTTCCTGA   | miRNA | miR-185    |
| t0042212 | 22 | 1 TGGAGACAAAGGCAATTCCTGA   | miRNA | miR-185    |
| t0042407 | 22 | 1 TGGGGAGAAAGGCAGTTTCTGA   | miRNA | miR-185    |
| t0042409 | 23 | 1 TGGAAAGAAAGGAAGTTCCTGAT  | miRNA | miR-185    |
| t0042806 | 20 | 1 TGGAGAGAAAGGCAGTTACA     | miRNA | miR-185    |
| t0043150 | 23 | 1 TTGAGAGAACGGCAGTTCCTGAA  | miRNA | miR-185    |
| t0043247 | 23 | 1 TGGAGAGAAAGGAAGTTCCTAAA  | miRNA | miR-185    |
| t0043360 | 24 | 1 TGAAGAGAAAGGCAGTTCCTGAAT | miRNA | miR-185    |
| t0043547 | 22 | 1 TGGAGTGAAAGGCAGTTCCTGC   | miRNA | miR-185    |
| t0043695 | 24 | 1 TGGAGAGAAAGGCAGTTCCTGCAG | miRNA | miR-185    |
| t0043737 | 22 | 1 TGGAGTGAAAGGCAGTTCCTGT   | miRNA | miR-185    |
| t0043768 | 22 | 1 TGGAGAGCAAGGCATTCCTGA    | miRNA | miR-185    |
| t0043850 | 21 | 1 TGAGAGAAAGGCAGTTCCTTA    | miRNA | miR-185    |
| t0043893 | 22 | 1 TAGAGAGAAAGGCCGTTCTGA    | miRNA | miR-185    |
| t0044054 | 22 | 1 TGGAGGGAAAGGCAGTTCCTGA   | miRNA | miR-185    |
| t0044088 | 24 | 1 TGGAGAGGAAGGCAGTTCCTGAGT | miRNA | miR-185    |
| t0044305 | 23 | 1 TGGAGAGACAGGCAGTTCCTGAA  | miRNA | miR-185    |
| t0044924 | 25 | 1 TGGAGAGAAAGGCAGTTCCTGAAA | miRNA | miR-185    |



|          |    |                               |       |         |
|----------|----|-------------------------------|-------|---------|
| t0045205 | 25 | 1 TGGAGAGAAAGGCAATTCCTGAAAA   | miRNA | miR-185 |
| t0045355 | 23 | 1 TTGAGCGAAAGGCAGTTCCTGAA     | miRNA | miR-185 |
| t0045388 | 23 | 1 TGGAGAGAAAGGCAGTTCATGGA     | miRNA | miR-185 |
| t0045531 | 22 | 1 TGGAGAGAAAGGCAGTTCTTTA      | miRNA | miR-185 |
| t0045684 | 22 | 1 TGGAAAAAAGGCAGTTCCTGA       | miRNA | miR-185 |
| t0045955 | 22 | 1 TGGAGAGAAAGATAGTTCCTGA      | miRNA | miR-185 |
| t0045994 | 19 | 1 CGGAGAGAAAGGCAGTTCC         | miRNA | miR-185 |
| t0046072 | 22 | 1 TGGAGAGAAAGGCAGTTTCGGA      | miRNA | miR-185 |
| t0046080 | 22 | 1 CGGAGAAAAAGGCAGTTCCTGA      | miRNA | miR-185 |
| t0046093 | 20 | 1 TGGAGAGAAAGACAGTTCCG        | miRNA | miR-185 |
| t0046109 | 24 | 1 TGGAGAGAAAGGCAGTTCGTGAGA    | miRNA | miR-185 |
| t0046560 | 27 | 1 TGGAGAGATAGGCAGTTCCTGAACGTT | miRNA | miR-185 |
| t0047230 | 20 | 1 TCGAGAGAGAGGCAGTTCCT        | miRNA | miR-185 |
| t0047476 | 22 | 1 TGGAGAGAAACACAGTTCCTGA      | miRNA | miR-185 |
| t0047483 | 22 | 1 TGGAGAGAAAGGCCGGTCCTGA      | miRNA | miR-185 |
| t0047484 | 25 | 1 TCGAGAGAAAGGCAGTTCCTGAATC   | miRNA | miR-185 |
| t0047677 | 22 | 1 TAGAGAGAAAGGCAGTTACTGA      | miRNA | miR-185 |
| t0047785 | 23 | 1 TGGAGAGAAAGGCAGTTAATGAA     | miRNA | miR-185 |
| t0047815 | 18 | 1 TGGAGGGAAAGGCAGTTG          | miRNA | miR-185 |
| t0047919 | 22 | 1 TGGAGAGAAAGGCATTTACTGA      | miRNA | miR-185 |
| t0048588 | 23 | 1 TGGACAGAAAGGCAGTTCCTGAT     | miRNA | miR-185 |
| t0048592 | 21 | 1 GGAGAGAAAAGCAGTTCCTGA       | miRNA | miR-185 |
| t0048877 | 22 | 1 TGGAGAGAAAGGCAGGTCCTGT      | miRNA | miR-185 |
| t0048972 | 22 | 1 TGGAGAGAAAGGGAGTTCCTTA      | miRNA | miR-185 |
| t0048973 | 22 | 1 TGTAGAGAAAGGCAATTCCTGA      | miRNA | miR-185 |
| t0049126 | 24 | 1 TGGAGAGAAACGCAGTTCCTGAAA    | miRNA | miR-185 |
| t0049266 | 22 | 1 TGAAGAGAAAGGCAGTTCCTGT      | miRNA | miR-185 |
| t0049404 | 23 | 1 TGGAGAGAGAGGCAGTTTCTGAA     | miRNA | miR-185 |
| t0049516 | 22 | 1 TGGAGAGAGATGCAGTTCCTGA      | miRNA | miR-185 |
| t0049552 | 22 | 1 TAGGGAGAAAGGCAGTTCCTGA      | miRNA | miR-185 |
| t0049850 | 20 | 1 TCGAGAGAAAGGCAGTTCCT        | miRNA | miR-185 |
| t0049925 | 22 | 1 TGGAGAGAAAAGCAGTTCCTGC      | miRNA | miR-185 |
| t0049958 | 22 | 1 CGGAGAGAAAAGCAGTTCCTGA      | miRNA | miR-185 |
| t0050152 | 24 | 1 TGGAGAGAAAGGCAGTTTCTGAAT    | miRNA | miR-185 |
| t0050167 | 24 | 1 TGGGGAGAAAGGCAGTTCCTGAGT    | miRNA | miR-185 |
| t0050343 | 22 | 1 TGGGAGAAAGGCAGTTCCTGAA      | miRNA | miR-185 |
| t0050469 | 22 | 1 TGGAGAGAAAGGCAGTTACTGC      | miRNA | miR-185 |
| t0050729 | 23 | 1 TGGAGAGAAAGGAAGTTCCTGTA     | miRNA | miR-185 |
| t0050923 | 22 | 1 TGGAGAGAAAGGCAGTTTCTCA      | miRNA | miR-185 |
| t0051259 | 22 | 1 TGGAGAGAAAACCAGTTCCTGA      | miRNA | miR-185 |
| t0051508 | 21 | 1 TGGAGAGAAAGGAAGTTCGTG       | miRNA | miR-185 |
| t0051608 | 23 | 1 TTGGAGAGAAAGGCAATTCCTGA     | miRNA | miR-185 |
| t0051842 | 22 | 1 TGCAGAGAAAGGCAGTTCCTGA      | miRNA | miR-185 |
| t0051933 | 22 | 1 TGGAGAAAAAGGGAGTTCCTGA      | miRNA | miR-185 |
| t0051983 | 23 | 1 TGGAGAGAAAGGCAGTTTCTGAG     | miRNA | miR-185 |
| t0052244 | 23 | 1 ATGGAGAGAAAGGGAGTTCCTGA     | miRNA | miR-185 |
| t0052249 | 22 | 1 TAGAGAGAAAGGCAGTTCCTGC      | miRNA | miR-185 |
| t0052270 | 22 | 1 TGGATAGAAAGGCAGCTCCTGA      | miRNA | miR-185 |
| t0052356 | 23 | 1 TGGAGAGAAAGGCAGTTCCTTGA     | miRNA | miR-185 |
| t0052700 | 26 | 1 TGGAGAGAAAGGCAGTTCCTTAAGGT  | miRNA | miR-185 |
| t0052902 | 22 | 1 TCGAGAGAAACGCAGTTCCTGA      | miRNA | miR-185 |
| t0053120 | 23 | 1 ATGGAGAGGAAGGCAGTTCCTGA     | miRNA | miR-185 |
| t0053197 | 22 | 1 TGGAGAGAAAGGAAGCTCCTGA      | miRNA | miR-185 |
| t0053222 | 23 | 1 TGGAGAGAAAGGCAGCTCTTGAA     | miRNA | miR-185 |
| t0053289 | 22 | 1 TGGAGAGAAAGTAAGTTCCTGA      | miRNA | miR-185 |
| t0053300 | 22 | 1 TGGACAGCAAGGCAGTTCCTGA      | miRNA | miR-185 |
| t0053361 | 22 | 1 TGGAGAGAAAGGCAGTTCCTGA      | miRNA | miR-185 |
| t0054005 | 22 | 1 TGGAGTGAAGGAAGTTCCTGA       | miRNA | miR-185 |

|          |    |                             |       |         |
|----------|----|-----------------------------|-------|---------|
| t0054054 | 23 | 1 TGGAGAGAAAGGGAGTTCCTGTG   | miRNA | miR-185 |
| t0054154 | 18 | 1 ATGGAGAGGAAGGCAGTT        | miRNA | miR-185 |
| t0055067 | 24 | 1 TGGAGAGAAAGACAGTTCCTGAAA  | miRNA | miR-185 |
| t0055078 | 22 | 1 TGTAGAGAAAGGCAGTTCCTTA    | miRNA | miR-185 |
| t0055096 | 21 | 1 TGTAGAGAAAGGCAGTTCCTT     | miRNA | miR-185 |
| t0055193 | 24 | 1 TGGAGAGAAAGGTAGTTCCTGAAA  | miRNA | miR-185 |
| t0055267 | 23 | 1 TGGAGACAAAGGCAGTTCCTGAT   | miRNA | miR-185 |
| t0055544 | 20 | 1 TGGAGAGAAAGGCAGCTCCT      | miRNA | miR-185 |
| t0055845 | 21 | 1 TGGAGAGAAAGACAGTTCATG     | miRNA | miR-185 |
| t0055880 | 22 | 1 TGGAGGGAAAGGCAGTTCCTAA    | miRNA | miR-185 |
| t0055957 | 18 | 1 TGGAGAGAACGGCAGTTT        | miRNA | miR-185 |
| t0056035 | 19 | 1 TGGAGAGGAAGGCAGTTCC       | miRNA | miR-185 |
| t0056068 | 22 | 1 GGGAGAGAAAGACAGTTCCTGA    | miRNA | miR-185 |
| t0056118 | 24 | 1 TGGAGAGAAAGGCAGTTCATGAAT  | miRNA | miR-185 |
| t0056292 | 22 | 1 TGGAGAGAGAGGCAGTTCATGA    | miRNA | miR-185 |
| t0056514 | 23 | 1 TGGAGAGAAAGGCGTTCCTGGT    | miRNA | miR-185 |
| t0056554 | 24 | 1 TGGAGAGAAAGGCAGTTCCTGAAA  | miRNA | miR-185 |
| t0056586 | 23 | 1 TGGAGAGACAAGCAGTTCCTGAA   | miRNA | miR-185 |
| t0056995 | 23 | 1 TGGAGAGAAAGGCAGTTCCTGTA   | miRNA | miR-185 |
| t0057443 | 22 | 1 TGGAGAGAAAGGCTGCTCCTGA    | miRNA | miR-185 |
| t0057702 | 21 | 1 TGGAGAGAAAGGCCGTTCTTA     | miRNA | miR-185 |
| t0058440 | 21 | 1 TGAAGAGAAAGGCATTCCTG      | miRNA | miR-185 |
| t0058447 | 22 | 1 TCGAGAGAAAGGCAGTTTCTGA    | miRNA | miR-185 |
| t0058586 | 22 | 1 TGGAGCGAAAGGCAGTTCATGA    | miRNA | miR-185 |
| t0058796 | 23 | 1 TGGAGAGAAAGGCAGTTATTGAA   | miRNA | miR-185 |
| t0058848 | 18 | 1 TGGAGAGAAAAGCAGTTG        | miRNA | miR-185 |
| t0059019 | 23 | 1 TGGAGAGAAAGGTAGTTCCTGAG   | miRNA | miR-185 |
| t0059313 | 22 | 1 TGGAGAGAAATGAAGTTCCTGA    | miRNA | miR-185 |
| t0059408 | 24 | 1 TGGTGAGAAAGGCAGTTCCTGAAA  | miRNA | miR-185 |
| t0059430 | 18 | 1 TAGAGAGAAAGGCAGTTG        | miRNA | miR-185 |
| t0059596 | 22 | 1 TGAAGAGAAAGGCAGTTCCTGC    | miRNA | miR-185 |
| t0060020 | 23 | 1 TTGAGAGAAAGGCCGTTCTGAA    | miRNA | miR-185 |
| t0060538 | 23 | 1 CGGAGAGAAAGACAGTTCCTGAA   | miRNA | miR-185 |
| t0060568 | 23 | 1 TGGAGATAAAGGCAGTTCCTGAT   | miRNA | miR-185 |
| t0060572 | 21 | 1 TGGAGAGAACGGCAGTTTCTG     | miRNA | miR-185 |
| t0060599 | 25 | 1 TGGCGAGAAAGGCAGTTCCTGATGG | miRNA | miR-185 |
| t0060850 | 22 | 1 TGGAGAGAAGGGCAGTTCATGA    | miRNA | miR-185 |
| t0061069 | 23 | 1 TGGAGAGAAAGGCAGTTCCTTTA   | miRNA | miR-185 |
| t0061348 | 23 | 1 TGGAGAGAAAGGCCGTTCTGCA    | miRNA | miR-185 |
| t0061425 | 23 | 1 TGAAGAGAAAGGCAGTTCCTGAG   | miRNA | miR-185 |
| t0061486 | 22 | 1 TGAAGACAAAGGCAGTTCCTGA    | miRNA | miR-185 |
| t0061566 | 24 | 1 TGGAGAGAAAGGCAGCTCCTGAAT  | miRNA | miR-185 |
| t0061815 | 23 | 1 GGGAGAGAAAGGCAGTTGCTGAA   | miRNA | miR-185 |
| t0062264 | 19 | 1 AGAGAAAGGAAGTTCCTGA       | miRNA | miR-185 |
| t0062483 | 20 | 1 TGGTGAGAAAGGCAGTTCCT      | miRNA | miR-185 |
| t0062521 | 22 | 1 TGGAGAGAAAGCCAGTTCCTGC    | miRNA | miR-185 |
| t0062620 | 23 | 1 TGGAGATAAAGGCAGTTCCTGAA   | miRNA | miR-185 |
| t0062671 | 22 | 1 TGGAGAGAAAGGCAGTTCCTAC    | miRNA | miR-185 |
| t0062741 | 23 | 1 TGGAGAGAAGGGCAGTTCCTGCA   | miRNA | miR-185 |
| t0062843 | 22 | 1 TGGAGAGAAGGGCAGTTACTGA    | miRNA | miR-185 |
| t0063184 | 21 | 1 TGGAGAGAAAGGCCGTTACTG     | miRNA | miR-185 |
| t0063388 | 18 | 1 TGGAGAGAAAGGCAGTGC        | miRNA | miR-185 |
| t0063478 | 22 | 1 TAGAGAGAAAGGCATTCCTGA     | miRNA | miR-185 |
| t0063540 | 23 | 1 TGGAGAAAAAGGCAGTTCCTGCG   | miRNA | miR-185 |
| t0063617 | 22 | 1 TGCAGAGCAAGGCAGTTCCTGA    | miRNA | miR-185 |
| t0063747 | 22 | 1 TGAGAGAAAGGCAGTTCCTGAT    | miRNA | miR-185 |
| t0063801 | 23 | 1 ATGGAAAGAAAGGCAGTTCCTGA   | miRNA | miR-185 |
| t0063808 | 18 | 1 CGGAGAGAAAGGCAGTTG        | miRNA | miR-185 |

|          |    |                            |       |         |
|----------|----|----------------------------|-------|---------|
| t0063858 | 22 | 1 TGGAGAGAAAGGCAGATCCTGC   | miRNA | miR-185 |
| t0063867 | 22 | 1 TGAGAGAAATGCAGTTCCTGAA   | miRNA | miR-185 |
| t0063929 | 23 | 1 TGGAGAGAAAGGCCGTTCTGAG   | miRNA | miR-185 |
| t0063967 | 22 | 1 TGGAGAGAACGGAAAGTTCCTGA  | miRNA | miR-185 |
| t0064038 | 22 | 1 TGGAGAGAAAGGAAATTCCTGA   | miRNA | miR-185 |
| t0064222 | 23 | 1 TGGAGAGAAAGGCAGTTCCTCCA  | miRNA | miR-185 |
| t0064444 | 23 | 1 TGGAGAGAAAGGCCGTTTCATGAG | miRNA | miR-185 |
| t0064529 | 22 | 1 TGGAGAGAAAGGTAGTTACTGA   | miRNA | miR-185 |
| t0064785 | 18 | 1 TGGGGAGAAAGGCAGTTC       | miRNA | miR-185 |
| t0064793 | 22 | 1 TGGAGAGAAACGAAGTTCCTGA   | miRNA | miR-185 |
| t0064880 | 21 | 1 TGGAGAGAAAGGCCGTTTCTG    | miRNA | miR-185 |
| t0065025 | 22 | 1 TGGATAGAAAGGCAGTTCCTGT   | miRNA | miR-185 |
| t0065101 | 24 | 1 TGGAAAGAAAGGCAGTTCCTGAAA | miRNA | miR-185 |
| t0065142 | 22 | 1 TGGAGAGAAAGGTTGTTCTGA    | miRNA | miR-185 |
| t0065190 | 24 | 1 TGGAGAGAAAGGCAGTTCCTGCGA | miRNA | miR-185 |
| t0065284 | 22 | 1 TGGAGAGTAAGGCAGTTCCTGA   | miRNA | miR-185 |
| t0065610 | 22 | 1 TGGAGAGAAAGGCAATTACTGA   | miRNA | miR-185 |
| t0065763 | 20 | 1 CGGAGAGAAGGGCAGTTCCT     | miRNA | miR-185 |
| t0065766 | 23 | 1 TGGTGAGAAAGGCAGTTCCTGAG  | miRNA | miR-185 |
| t0065796 | 21 | 1 TGGAGGGAAAGGCAGTTCCTG    | miRNA | miR-185 |
| t0066084 | 22 | 1 TGGATAGAAAGGCAGTTACTGA   | miRNA | miR-185 |
| t0066151 | 22 | 1 TGGAGAGAAAGGCCGATCCTGA   | miRNA | miR-185 |
| t0066161 | 22 | 1 TGGAGAGAGAGGCAGTTGCTGA   | miRNA | miR-185 |
| t0066179 | 20 | 1 TGGGGAGAAAGGCCGTTCT      | miRNA | miR-185 |
| t0066510 | 21 | 1 TGGAGCGAAAGGAAGTTCCTG    | miRNA | miR-185 |
| t0066861 | 23 | 1 TGGAGAGAAAGGCAGTTCCTCAT  | miRNA | miR-185 |
| t0067004 | 22 | 1 TGGAGAGAAAGGCAGTTCCTCGT  | miRNA | miR-185 |
| t0067034 | 19 | 1 TAGAGAGAAAGGCAGTTCC      | miRNA | miR-185 |
| t0067242 | 22 | 1 TGGGGAGAAAGGCAGTTCCTGA   | miRNA | miR-185 |
| t0067270 | 22 | 1 TGGAGAGACAGGCCGTTCTGA    | miRNA | miR-185 |
| t0067728 | 21 | 1 GGAGAGAAAGGCAGTTCCTGC    | miRNA | miR-185 |
| t0067741 | 19 | 1 TGGAGAGAAATGCAGTTCC      | miRNA | miR-185 |
| t0068111 | 22 | 1 TGGAGAGAAACGCAGTTCCTGC   | miRNA | miR-185 |
| t0068245 | 23 | 1 TGGAGAGTAAGGCAGTTCCTGAG  | miRNA | miR-185 |
| t0068676 | 22 | 1 TGGAGAGAAAAGCAGTTCCTGT   | miRNA | miR-185 |
| t0069063 | 22 | 1 TGGAGAGAAAGGCAGTACCTTA   | miRNA | miR-185 |
| t0069112 | 23 | 1 TGGAGCGAAAGGCAGGTCCTGAT  | miRNA | miR-185 |
| t0069264 | 23 | 1 TGGAGAGAACGGCAGTTTCTGAT  | miRNA | miR-185 |
| t0069503 | 22 | 1 TGGAGACAAAGGCAGTTTCTGA   | miRNA | miR-185 |
| t0069698 | 22 | 1 TGGGGAGAAAGGCAGTTCCTGT   | miRNA | miR-185 |
| t0069774 | 20 | 1 TGGAGACAAAGGCAGTTCCT     | miRNA | miR-185 |
| t0070193 | 22 | 1 TGGAGAGATAGGAAGTTCCTGA   | miRNA | miR-185 |
| t0070316 | 22 | 1 TGGAGAGAAAGGCAGTTCATGG   | miRNA | miR-185 |
| t0070469 | 21 | 1 TGGAGGGAAAGGCAGTTACTG    | miRNA | miR-185 |
| t0071030 | 20 | 1 TGGAGAGATAGGCAGTTCCT     | miRNA | miR-185 |
| t0071489 | 22 | 1 TGGAGAGAAAGGCAGTTCCTGA   | miRNA | miR-185 |
| t0071549 | 24 | 1 TGGAGAGAAAGGCAGTTCATGAAA | miRNA | miR-185 |
| t0071567 | 23 | 1 TGGAGAGAAAGGCCGTTCCCGAA  | miRNA | miR-185 |
| t0071635 | 22 | 1 TGGATAGAAAGGAAGTTCCTGA   | miRNA | miR-185 |
| t0072001 | 21 | 1 TGGAGATAAAGGCAGTTCCTG    | miRNA | miR-185 |
| t0072057 | 22 | 1 TGGAGAGGAAGTCAGTTCCTGA   | miRNA | miR-185 |
| t0072445 | 20 | 1 TGGAGAGAAAGGAAGTTACT     | miRNA | miR-185 |
| t0072561 | 22 | 1 TGGAGAGAAAGGCAGTACCTGT   | miRNA | miR-185 |
| t0072624 | 22 | 1 TGGAGACAAAGGGAGTTCCTGA   | miRNA | miR-185 |
| t0072775 | 22 | 1 TGGAGAGAAAGGCAGTTGCTGT   | miRNA | miR-185 |
| t0072907 | 22 | 1 TGGAGAGAAAGGTAGTTCCTTA   | miRNA | miR-185 |
| t0072976 | 22 | 1 TGGAGAGAAAGGTAGTTCCTGC   | miRNA | miR-185 |
| t0073226 | 22 | 1 GGGAGAGAAAGGCAGTTCCTTA   | miRNA | miR-185 |

|          |    |                               |       |         |
|----------|----|-------------------------------|-------|---------|
| t0073381 | 23 | 1 GTGGAGGGAAAGGCAGTTCCTGA     | miRNA | miR-185 |
| t0073525 | 22 | 1 TGGAGAGAAAGGCAGTTCGTGT      | miRNA | miR-185 |
| t0073543 | 22 | 1 TGGAGATAAAGGGAGTTCCTGA      | miRNA | miR-185 |
| t0073615 | 22 | 1 CGGAGAGAAAGGCAGTTCCTGC      | miRNA | miR-185 |
| t0073616 | 22 | 1 TGGAGAGAAAGAAAGTTCCTGA      | miRNA | miR-185 |
| t0073821 | 20 | 1 TGGAGAGAAAGGGAGTTCAT        | miRNA | miR-185 |
| t0073831 | 22 | 1 TGGAGGGAAAGGTAGTTCCTGA      | miRNA | miR-185 |
| t0073954 | 22 | 1 TGGAGAGAAAGGCAGCTCCTGG      | miRNA | miR-185 |
| t0074305 | 21 | 1 TGGAGAGAAAGGAGTTCCTG        | miRNA | miR-185 |
| t0074411 | 22 | 1 TGAAGAGAAAGGAAGTTCCTGA      | miRNA | miR-185 |
| t0074527 | 23 | 1 ATGGAGAGAAAGGCAGTTCCTAA     | miRNA | miR-185 |
| t0074657 | 22 | 1 TGGGGAGAAAGGCCGTTTCCTGA     | miRNA | miR-185 |
| t0074770 | 20 | 1 TGGAGAGAAAGAAAGTTCCT        | miRNA | miR-185 |
| t0074873 | 21 | 1 TGAGAGAAAGGCAGTTTCTGA       | miRNA | miR-185 |
| t0075223 | 19 | 1 TGGGGAGAAAGGCAGTTCC         | miRNA | miR-185 |
| t0075288 | 22 | 1 TGGAGAGAAAGGCAGTACCCGA      | miRNA | miR-185 |
| t0075374 | 22 | 1 TGGAGAGAGAGGCAGTCCCTGA      | miRNA | miR-185 |
| t0075506 | 20 | 1 AGGAGAAAGGCAGTTCCTGA        | miRNA | miR-185 |
| t0075545 | 21 | 1 TGGAGAAAAAGGCAGTTCATG       | miRNA | miR-185 |
| t0075738 | 24 | 1 TGAGAGAAAGGCAGTTCCTGAAAG    | miRNA | miR-185 |
| t0076135 | 23 | 1 TGGAGGGAAAGGCAGTTCCTTAA     | miRNA | miR-185 |
| t0076166 | 22 | 1 GGGAGAGAAAGGCAGTTCCTGT      | miRNA | miR-185 |
| t0076313 | 24 | 1 TGGAGTGAAGGCAGTTCCTGAGT     | miRNA | miR-185 |
| t0076314 | 20 | 1 TGGAGAGAAAGTCAGTTCCT        | miRNA | miR-185 |
| t0076679 | 23 | 1 TGGAGAGAAAGGCAGTTCGTGAG     | miRNA | miR-185 |
| t0076784 | 22 | 1 TGGGGAGGAAGGCAGTTCCTGA      | miRNA | miR-185 |
| t0076792 | 27 | 1 TCGAGAGAAAGGCAGTTCCTGAACGTT | miRNA | miR-185 |
| t0076923 | 24 | 1 TGGAGAGAAAGGCAGCTCCTGAAA    | miRNA | miR-185 |
| t0077429 | 22 | 1 TGGAGGGAAAGGCAGCTCCTGA      | miRNA | miR-185 |
| t0077435 | 23 | 1 TGGAGAGAAAGGCAGTTCATGCG     | miRNA | miR-185 |
| t0077481 | 18 | 1 TGGAGAGAAAGCCAGTTG          | miRNA | miR-185 |
| t0077489 | 21 | 1 CGGAGAGAAAGGCAGTTCCTTG      | miRNA | miR-185 |
| t0077636 | 23 | 1 TGGACAGAAAGGGAGTTCCTGAA     | miRNA | miR-185 |
| t0077742 | 22 | 1 TGGAGAGGAAGGCAGTTCCTGC      | miRNA | miR-185 |
| t0078172 | 22 | 1 TGGGGAGAAAGGAAGTTCCTGA      | miRNA | miR-185 |
| t0079105 | 23 | 1 TGGAGGGAAAGGCAGTTCCTGCT     | miRNA | miR-185 |
| t0079498 | 21 | 1 TGGAGAGAAAGGTAGTTCCTA       | miRNA | miR-185 |
| t0079821 | 23 | 1 TGGAGAGCAAGGCAGTTCATGAT     | miRNA | miR-185 |
| t0080262 | 24 | 1 TGGAGAGAAAGGCAGTTCGTGATT    | miRNA | miR-185 |
| t0080608 | 19 | 1 TGGAGAGAAAGGAAGTTCC         | miRNA | miR-185 |
| t0081098 | 23 | 1 TGGAGAGAAAGCCAGTTCCTGAG     | miRNA | miR-185 |
| t0081127 | 22 | 1 TGGAGAAAAAGGCAGTTCATGA      | miRNA | miR-185 |
| t0081436 | 22 | 1 TGGAGGGATAGGCAGTTCCTGA      | miRNA | miR-185 |
| t0081756 | 22 | 1 TGGAGAGAAAGGCAGGTCCTTA      | miRNA | miR-185 |
| t0081907 | 22 | 1 TGGAGAGAAAGGTAGTTCCTGT      | miRNA | miR-185 |
| t0081959 | 22 | 1 TGGAGAGGAAGGCAGTTTCTGA      | miRNA | miR-185 |
| t0082160 | 22 | 1 GGGAGGGAAAGGCAGTTCCTGA      | miRNA | miR-185 |
| t0082687 | 23 | 1 TTGAGAGAAAGGCAGTTCCTGAT     | miRNA | miR-185 |
| t0082748 | 25 | 1 TGGAGTGAAGGCAGTTCCTGAAAA    | miRNA | miR-185 |
| t0082981 | 22 | 1 TGGAGAGAAAGGAAGTTCGTGA      | miRNA | miR-185 |
| t0083187 | 22 | 1 TGGAGGGAAAGGCAGTTCATGA      | miRNA | miR-185 |
| t0083200 | 23 | 1 TGGGGAGAAAGGAAGTTCCTGAA     | miRNA | miR-185 |
| t0083430 | 23 | 1 TGTAGAGAAAGGCAGTTCCTGAT     | miRNA | miR-185 |
| t0083564 | 24 | 1 GGGAGAGAAAGGCAGTTCCTGAAA    | miRNA | miR-185 |
| t0083976 | 23 | 1 TGGCGAGAAAGGCAGTTCCTGCT     | miRNA | miR-185 |
| t0084080 | 24 | 1 TGGAGAGAAAGGCAGTTCAGAAT     | miRNA | miR-185 |
| t0084091 | 22 | 1 TGGAGATAAAGGCAGTTCCTGA      | miRNA | miR-185 |
| t0084284 | 22 | 1 TGGAGAGAAAGTCAGTTCCTGT      | miRNA | miR-185 |

|          |    |                                 |       |            |
|----------|----|---------------------------------|-------|------------|
| t0084313 | 23 | 1 TGGAGACAAAGGAAGTTCCTGAA       | miRNA | miR-185    |
| t0084517 | 22 | 1 TGGAGAGAAAGGCAGTTCCTGC        | miRNA | miR-185    |
| t0084527 | 22 | 1 TGGAGAGGAAGGCCGTTCTGA         | miRNA | miR-185    |
| t0084719 | 21 | 1 TGGAGAGAAAGGCAATTGCTG         | miRNA | miR-185    |
| t0084736 | 23 | 1 TGGAGAGAAGGGAAGTTCCTGAT       | miRNA | miR-185    |
| t0084836 | 23 | 1 TGGAGGGAAACGCAGTTCCTGAT       | miRNA | miR-185    |
| t0084953 | 25 | 1 AGGAGAGAAAGGCAGTTCCTGAAAA     | miRNA | miR-185    |
| t0085176 | 23 | 1 TGGAGAGAAAGGCAGTTCCTGCC       | miRNA | miR-185    |
| t0085557 | 23 | 1 TGGAGAGAAAGGCAGTTTCTGCT       | miRNA | miR-185    |
| t0086036 | 22 | 1 TGGAGAGAAAGGCTGTTACTGA        | miRNA | miR-185    |
| t0086198 | 23 | 1 TGTAGAGAAAGGCAGTTCCTGCA       | miRNA | miR-185    |
| t0086242 | 22 | 1 TGGAGAGGAAGGTAGTTCCTGA        | miRNA | miR-185    |
| t0086331 | 23 | 1 TGGAGGGAAAGGCAGTTCCTTAG       | miRNA | miR-185    |
| t0086647 | 22 | 1 TGGGGAGAAAGGCAGTTCCTGC        | miRNA | miR-185    |
| t0086978 | 22 | 1 TGGAGAGAAAAGCATTTCTGA         | miRNA | miR-185    |
| t0087061 | 23 | 1 CGGAGAGAAAGGAAGTTCCTGAG       | miRNA | miR-185    |
| t0087116 | 23 | 1 AGGAGAGAAAGGAAGTTCCTGAG       | miRNA | miR-185    |
| t0087217 | 20 | 1 TGGAGACAAAGGCAGTTCCG          | miRNA | miR-185    |
| t0087823 | 25 | 1 TGGGGAGAAAGGCAGTTCCTGAAAA     | miRNA | miR-185    |
| t0087876 | 22 | 1 TGGAGAGAAAGGAAGTTCCTGG        | miRNA | miR-185    |
| t0087880 | 22 | 1 CGGAGAGAAAGGGAGTTCCTGA        | miRNA | miR-185    |
| t0087925 | 20 | 1 TGGAAAGAAAGGCAGTTCCT          | miRNA | miR-185    |
| t0088076 | 22 | 1 TTGAGAGAAAGGAAGTTCCTGA        | miRNA | miR-185    |
| t0088196 | 18 | 1 TGGGGAGAAAGGCAGTTG            | miRNA | miR-185    |
| t0088325 | 22 | 1 CGGAGATAAAGGCAGTTCCTGA        | miRNA | miR-185    |
| t0088406 | 23 | 1 TGGAGAGAAAGGCAGTTAATGAT       | miRNA | miR-185    |
| t0088481 | 22 | 1 TGGGGAGAAAGGCAGTTCATGA        | miRNA | miR-185    |
| t0088561 | 20 | 1 TGGAGAGACAGGCAGTTCCT          | miRNA | miR-185    |
| t0088668 | 18 | 1 TGGAGGGAAAGGCAGTTC            | miRNA | miR-185    |
| t0088738 | 21 | 1 TGGAGAGAAAGGCAGTTATTG         | miRNA | miR-185    |
| t0088762 | 18 | 1 TGGAGAGAAAGGCAGATC            | miRNA | miR-185    |
| t0089043 | 23 | 1 TGGAGAGAAAGGCAGCTCCTGAG       | miRNA | miR-185    |
| t0089128 | 22 | 1 TGGAGAGAACGGCAGTTACTGA        | miRNA | miR-185    |
| t0089172 | 18 | 1 TGGAGAGAAAGGCAGGTG            | miRNA | miR-185    |
| t0089262 | 23 | 1 TGGAGAGCAAGGCAGTTCCTGGA       | miRNA | miR-185    |
| t0089296 | 22 | 1 TGAAGCGAAAGGCAGTTCCTGA        | miRNA | miR-185    |
| t0089573 | 24 | 1 TGGAGAGAAAGGCAGTTCCTGCAT      | miRNA | miR-185    |
| t0089644 | 22 | 1 ATGGAGAGAAAGGCCGTTCTG         | miRNA | miR-185    |
| t0089666 | 20 | 1 GGAGAGAAAGGCAGGTCCTG          | miRNA | miR-185    |
| t0089680 | 22 | 1 TGGAGAGAGAGGCAGTTCCTGT        | miRNA | miR-185    |
| t0090026 | 22 | 1 TGGAGATAACGGCAGTTCCTGA        | miRNA | miR-185    |
| t0090314 | 22 | 1 TGGAGAGAAAGGCAGTTACTAA        | miRNA | miR-185    |
| t0090410 | 22 | 1 TAGAGAGCAAGGCAGTTCCTGA        | miRNA | miR-185    |
| t0090657 | 20 | 1 TGGAGAGAAAGCCAGTTCCT          | miRNA | miR-185    |
| t0091115 | 21 | 1 GGAGAGAAAGGCAGTTCCTGA         | miRNA | miR-185    |
| t0091151 | 20 | 1 TGGAGAGAAAGGCAGATCCA          | miRNA | miR-185    |
| t0091166 | 21 | 1 TGGAGAGAAAGGCAGTTCCTA         | miRNA | miR-185    |
| t0091294 | 22 | 1 CGGAGAGAAAGGAAGTTCCTGA        | miRNA | miR-185    |
| t0091362 | 22 | 1 TGGAGAGAAAGGCAGTTCATGT        | miRNA | miR-185    |
| t0091385 | 22 | 1 TGGAGAGAAAGGCAGTTCCTTA        | miRNA | miR-185    |
| t0091533 | 22 | 1 TGGAGAGAAAGGCAGTTCCTCC        | miRNA | miR-185    |
| t0091724 | 25 | 1 TGGCCGGAGAAGTCTGATAAGGGCATC   | miRNA | miR-184-3p |
| t0091791 | 25 | 1 TAGACGGAGAAGTCTGATAAGGGCATC   | miRNA | miR-184-3p |
| t0091951 | 25 | 1 TGGACGGAGAAGTCTGATAAGGGCGTC   | miRNA | miR-184-3p |
| t0092229 | 25 | 1 TGGACGGGGAAGTCTGATAAGGGCATC   | miRNA | miR-184-3p |
| t0092307 | 25 | 1 TGGACGGAGCAAGTCTGATAAGGGGAATC | miRNA | miR-184-3p |
| t0092397 | 25 | 1 TGGACGGAGAGCTGATAAGGGTATC     | miRNA | miR-184-3p |
| t0092421 | 24 | 1 TGGACGGTGAAGTCTGATAAGGGCTT    | miRNA | miR-184-3p |

|          |    |                               |       |             |
|----------|----|-------------------------------|-------|-------------|
| t0092564 | 25 | 1 TGGACGGAGAACTGATAAGGGAATT   | miRNA | miR-184-3p  |
| t0092762 | 25 | 1 TGGACGGAGAACTGATAAGGGAATA   | miRNA | miR-184-3p  |
| t0092931 | 22 | 1 TGGACGGAGAACTGATTGGGGC      | miRNA | miR-184-3p  |
| t0092955 | 25 | 1 TGGACGGAGAACTGATAAGGGGATC   | miRNA | miR-184-3p  |
| t0092962 | 27 | 1 TGGACGGAGAACTGATAAGGGTATATC | miRNA | miR-184-3p  |
| t0092977 | 25 | 1 TGGACGGAGAACTGATACGGGCATC   | miRNA | miR-184-3p  |
| t0040807 | 25 | 1 TGGACGGAGAACTGATAAGGGCATA   | miRNA | miR-184-3p  |
| t0042959 | 25 | 1 TGGAAGGAGAACTGATAAGGGAATC   | miRNA | miR-184-3p  |
| t0043122 | 25 | 1 TGGACGGAGGACTGATAAGGGAATC   | miRNA | miR-184-3p  |
| t0053378 | 23 | 1 TAGACGGAGAACTGATAAGGGCA     | miRNA | miR-184-3p  |
| t0060099 | 24 | 1 TGGACGGAGAACTGATTAGGGATC    | miRNA | miR-184     |
| t0065630 | 22 | 1 TGGACGGAGAACTGATAAGGGA      | miRNA | miR-184     |
| t0066870 | 24 | 1 TGGACGGAGAACTGATAAGGGATT    | miRNA | miR-184     |
| t0072955 | 24 | 1 TGGAAGGAGAACTGATAAGGGATC    | miRNA | miR-184     |
| t0075033 | 24 | 1 TGGACGGAGAACTGATGAGGGATC    | miRNA | miR-184     |
| t0079384 | 20 | 1 TGGACGGAGAATTGATAGGG        | miRNA | miR-184     |
| t0079849 | 23 | 1 TGGACGGAGAACTGATACGGGAA     | miRNA | miR-184     |
| t0083092 | 24 | 1 TGCACGGAGAACTGATAAGGGATC    | miRNA | miR-184     |
| t0084277 | 20 | 1 TGGACGGCGAACTGATAGGG        | miRNA | miR-184     |
| t0084937 | 21 | 1 AGACCTACTTGTCTACCAACA       | miRNA | miR-1839-3p |
| t0089625 | 21 | 1 AGACCTACTTATCTACCCACA       | miRNA | miR-1839-3p |
| t0089759 | 21 | 1 AGACCTACTTATTTACCAACC       | miRNA | miR-1839-3p |
| t0092301 | 22 | 1 AGACCTACTTATCTCCCAACAG      | miRNA | miR-1839-3p |
| t0044513 | 21 | 1 AAACCTACTTATCTACCAACA       | miRNA | miR-1839-3p |
| t0045625 | 21 | 1 AGACCTAGTTATCTACCAACA       | miRNA | miR-1839-3p |
| t0046807 | 23 | 1 AAGGAAGATAGAACAGGTCTTGA     | miRNA | miR-1839    |
| t0050262 | 20 | 1 AAGGTAGATAGGACAGGTCT        | miRNA | miR-1839    |
| t0050420 | 22 | 1 AAGGTAGATGGAACAGGTCTTG      | miRNA | miR-1839    |
| t0063893 | 22 | 1 AGGGAGATAGAACAGGTCTTGT      | miRNA | miR-1839    |
| t0078381 | 22 | 1 AAGGTAGATAGAACAGGACTTG      | miRNA | miR-1839    |
| t0078920 | 21 | 1 AGGTAGATAGAATAGGTCTTG       | miRNA | miR-1839    |
| t0091472 | 22 | 1 AGGTAGATAGAACAGGTCTTGG      | miRNA | miR-1839    |
| t0048476 | 22 | 1 AAGGTAGCTAGAACAGGTCTTG      | miRNA | miR-1839    |
| t0050724 | 21 | 1 AGGTAGAAAGAACAGGTCTTG       | miRNA | miR-1839    |
| t0053018 | 23 | 1 AAAGGTAGATAGAACAGATCTTG     | miRNA | miR-1839    |
| t0055372 | 22 | 1 AAGGTAGATAGCACAGGTTTTG      | miRNA | miR-1839    |
| t0066230 | 22 | 1 AGGTAGATAGAAAAGGTCTTGT      | miRNA | miR-1839    |
| t0077625 | 20 | 1 AAGGTAGATAGAACAGGCCT        | miRNA | miR-1839    |
| t0041702 | 21 | 1 AGGTAGATATAACAGGTCTTG       | miRNA | miR-1839    |
| t0042119 | 21 | 1 AGGGAGATAGAACAGGGCTTG       | miRNA | miR-1839    |
| t0043551 | 23 | 1 AAAGGTAGATAGAACAGGTCCTG     | miRNA | miR-1839    |
| t0045176 | 22 | 1 AGGTAGATAGAACGGGTCTTGT      | miRNA | miR-1839    |
| t0045903 | 21 | 1 AGGGAGATACAACAGGTCTTG       | miRNA | miR-1839    |
| t0046193 | 23 | 1 AGGTAGATAGAACAGGGCTTGT      | miRNA | miR-1839    |
| t0046449 | 22 | 1 AGGTAGATAGAACAGGTCTTAA      | miRNA | miR-1839    |
| t0046529 | 21 | 1 AGGTAGATAGACCAGGTCTTG       | miRNA | miR-1839    |
| t0047304 | 21 | 1 AGGTAGATAGAAGAGGTCTTG       | miRNA | miR-1839    |
| t0047308 | 20 | 1 AGTAGATAGAACAGGTCTTG        | miRNA | miR-1839    |
| t0047311 | 21 | 1 AAGGTAGATAGAACAGGGCTT       | miRNA | miR-1839    |
| t0048012 | 22 | 1 AAGGCAGATAGAACAGGTTTTG      | miRNA | miR-1839    |
| t0050257 | 23 | 1 AAGGTGGATAGAACAGGTCTTGA     | miRNA | miR-1839    |
| t0050704 | 24 | 1 AAAGGTAGATAGAACAGGGCTTGA    | miRNA | miR-1839    |
| t0050869 | 22 | 1 AAGGTAGATAGAACACGTCTTG      | miRNA | miR-1839    |
| t0050995 | 23 | 1 AAAGGTAGATAGGACAGGTCTTG     | miRNA | miR-1839    |
| t0051675 | 22 | 1 AAGGTAGATAGCACAGGTCTTG      | miRNA | miR-1839    |
| t0052878 | 23 | 1 AGGTAAATAGAACAGGTCTTGT      | miRNA | miR-1839    |
| t0053062 | 23 | 1 AAGGTAAATAGAACAGGTCTTGA     | miRNA | miR-1839    |
| t0053656 | 22 | 1 AAGGAAGATAGAACAAGTCTTG      | miRNA | miR-1839    |

|          |    |                            |       |          |
|----------|----|----------------------------|-------|----------|
| t0053930 | 22 | 1 AGGTAGATAGAATAGGTCTTGT   | miRNA | miR-1839 |
| t0054517 | 21 | 1 AGGTAGATAGAACAGATCTTG    | miRNA | miR-1839 |
| t0054694 | 22 | 1 AAGGTAGATTGAACAGGTCTTG   | miRNA | miR-1839 |
| t0055634 | 22 | 1 AGGTAGATAGAACAGGACTTGA   | miRNA | miR-1839 |
| t0055901 | 22 | 1 AAGGGAGATAGAACAGGTTTTG   | miRNA | miR-1839 |
| t0056742 | 22 | 1 AAGGTAGATAGAACCGGTCTTG   | miRNA | miR-1839 |
| t0057154 | 22 | 1 AAGGAAGATAGAACATGTCTTG   | miRNA | miR-1839 |
| t0057754 | 20 | 1 AAGGTAGATAGAACCGGTCT     | miRNA | miR-1839 |
| t0058355 | 21 | 1 TGGTAGATAGAACAGGTCTTG    | miRNA | miR-1839 |
| t0060644 | 22 | 1 AAGGTAGATACAACAGGTCTTG   | miRNA | miR-1839 |
| t0060721 | 20 | 1 AAGGTAGATAAAACAGGTCT     | miRNA | miR-1839 |
| t0060724 | 22 | 1 AAGGTAGATAGAACAGTCTTG    | miRNA | miR-1839 |
| t0060917 | 23 | 1 AAAGGTAGATAGAACAGGTCTGG  | miRNA | miR-1839 |
| t0061305 | 22 | 1 AGGTGGATAGAACAGGTCTTGA   | miRNA | miR-1839 |
| t0064795 | 20 | 1 AAGGTAGATAGACCAGGTCT     | miRNA | miR-1839 |
| t0064928 | 22 | 1 AGGTAGATAGAACAGGTCTAGT   | miRNA | miR-1839 |
| t0066270 | 22 | 1 AAGGTGATAGAACAGGTCTTG    | miRNA | miR-1839 |
| t0067213 | 22 | 1 AAGGTGGATAGAACAGGTCTTG   | miRNA | miR-1839 |
| t0067760 | 21 | 1 AGGTAGATAGAACCGGTCTTA    | miRNA | miR-1839 |
| t0069325 | 22 | 1 AAGGTAGATAGAACAGGTCATG   | miRNA | miR-1839 |
| t0069605 | 21 | 1 AGGTAGCTAGAACAGGTCTTG    | miRNA | miR-1839 |
| t0070024 | 21 | 1 AAGTAGATAGAACAGGTCTTG    | miRNA | miR-1839 |
| t0070334 | 22 | 1 AAGGTAGATAGGACAGGTCTTG   | miRNA | miR-1839 |
| t0070754 | 18 | 1 AAGGTAGATAGAACCGGT       | miRNA | miR-1839 |
| t0071121 | 21 | 1 AGGTAGATAGGACAGGTCTTG    | miRNA | miR-1839 |
| t0071366 | 22 | 1 AAGGTAGATAGAACATGTCTTG   | miRNA | miR-1839 |
| t0071649 | 22 | 1 AAGGTAGAAAGAACAGGTCTTG   | miRNA | miR-1839 |
| t0072011 | 24 | 1 AAAGGGAGATAGAACAGGTCTTGA | miRNA | miR-1839 |
| t0073020 | 22 | 1 AGGTAGATAGAACTGGTCTTGT   | miRNA | miR-1839 |
| t0073401 | 21 | 1 AGGTAGATAGAACAGGTCATG    | miRNA | miR-1839 |
| t0075032 | 22 | 1 AGGTAGATAGAACAGGTCTTGC   | miRNA | miR-1839 |
| t0076516 | 21 | 1 AGGTAGATAAAACAGGTCTTG    | miRNA | miR-1839 |
| t0076755 | 22 | 1 AAAGTAGATAGAACAGGTCTTG   | miRNA | miR-1839 |
| t0076881 | 21 | 1 AGGGAGATAGAACAGGTCTTA    | miRNA | miR-1839 |
| t0076964 | 22 | 1 AAGATAGATAGAACAGGTCTTG   | miRNA | miR-1839 |
| t0077968 | 22 | 1 AGGTAATAGAACAGGTCTTGT    | miRNA | miR-1839 |
| t0078462 | 18 | 1 AAGGGAGATAGAACAGGT       | miRNA | miR-1839 |
| t0079408 | 22 | 1 AGATAGATAGAACAGGTCTTGT   | miRNA | miR-1839 |
| t0079544 | 23 | 1 AAGGCAGATAGAACAGGTCTTGA  | miRNA | miR-1839 |
| t0081632 | 21 | 1 AGGTAGATAGAACGGGTCTTG    | miRNA | miR-1839 |
| t0081678 | 22 | 1 AAGGTAGATAGGACAGGTTTTG   | miRNA | miR-1839 |
| t0082488 | 23 | 1 AAAGGTAGATAGATCAGGTTTTG  | miRNA | miR-1839 |
| t0083272 | 21 | 1 AAGGGAGATAGAACAGGTCTT    | miRNA | miR-1839 |
| t0083657 | 20 | 1 TGAATTACCGAAGGGCCCTA     | miRNA | miR-183* |
| t0084522 | 20 | 1 TGAATTACCGAAGGGACATA     | miRNA | miR-183* |
| t0084822 | 19 | 1 TATGGAAGTGGTAGAATTA      | miRNA | miR-183  |
| t0085394 | 19 | 1 TATGGCACTGGTAGAATC       | miRNA | miR-183  |
| t0088184 | 21 | 1 TATGGCACTGGTAGAATTC      | miRNA | miR-183  |
| t0088903 | 22 | 1 TGTGGCACTGGTAGAATTC      | miRNA | miR-183  |
| t0089907 | 28 | 1 TATGGCACTTGTAGAATTC      | miRNA | miR-183  |
| t0091447 | 24 | 1 TATGGCACTGGTAGAATCC      | miRNA | miR-183  |
| t0092119 | 27 | 1 ATGGCACTGGTAGAATCC       | miRNA | miR-183  |
| t0092319 | 20 | 1 CATGGCACTGGTAGAATTA      | miRNA | miR-183  |
| t0092384 | 22 | 1 TATGGCACTGGTAGAATTA      | miRNA | miR-183  |
| t0092957 | 20 | 1 TATGGCACTGGTAGAATTA      | miRNA | miR-183  |
| t0093129 | 20 | 1 TATGGCACCGGTAGAATTA      | miRNA | miR-183  |
| t0055114 | 24 | 1 ATGGCACTGGTAGAATTC       | miRNA | miR-183  |
| t0092422 | 22 | 1 TGAGGGAGTACATTGTATAGT    | miRNA | miR-1827 |

|          |    |                               |       |          |
|----------|----|-------------------------------|-------|----------|
| t0041422 | 22 | 1 TGAGGAAGTAGATTGTATAGTC      | miRNA | miR-1827 |
| t0044889 | 21 | 1 TGAGGGAGTAGATTGTTAGTT       | miRNA | miR-1827 |
| t0049438 | 22 | 1 TGAGGGGAGTAGATTGTATAGTC     | miRNA | miR-1827 |
| t0068435 | 22 | 1 TGAGGGGAGTATATTGTATAGTT     | miRNA | miR-1827 |
| t0068838 | 22 | 1 TGAGGAAGAAGATTGTATAGGA      | miRNA | miR-1827 |
| t0077039 | 23 | 1 TGAGGGGAGTAGATTGTATACTTG    | miRNA | miR-1827 |
| t0080125 | 20 | 1 TGGGAGTAGATTGTATAGTT        | miRNA | miR-1827 |
| t0084931 | 22 | 1 TGAGGGGAGAAGATTGGATAGTT     | miRNA | miR-1827 |
| t0085310 | 21 | 1 TGAGGGGAGTAGAGTGTATAGT      | miRNA | miR-1827 |
| t0087518 | 21 | 1 AGGGAGTAGATTGTATAGTTG       | miRNA | miR-1827 |
| t0087819 | 21 | 1 CGAGGGAGTAGGTTGTATAGT       | miRNA | miR-1827 |
| t0089974 | 22 | 1 TGAGGGGAGTGGGTTGTATAGTT     | miRNA | miR-1827 |
| t0040786 | 20 | 1 TGAGGGGAGTAGATTGTGTCG       | miRNA | miR-1827 |
| t0040855 | 21 | 1 TGAGGGGAGTAGATCGTATAGT      | miRNA | miR-1827 |
| t0041108 | 22 | 1 TGGGGGGGTAGATTGTATAGTT      | miRNA | miR-1827 |
| t0041541 | 23 | 1 TGAGGGGAGTAGGTTGTATAGTAA    | miRNA | miR-1827 |
| t0041717 | 22 | 1 TGAGGGGAGTAGATTGTGCAGTT     | miRNA | miR-1827 |
| t0041752 | 22 | 1 TGAGGGGAGTAGACTGTATAGTT     | miRNA | miR-1827 |
| t0042574 | 21 | 1 TGGGGGAGTAGGTTGTATAGT       | miRNA | miR-1827 |
| t0042944 | 20 | 1 TGAGGGACTAGATTGTATAG        | miRNA | miR-1827 |
| t0043144 | 24 | 1 TGAGGGGAGTAGGTTGTATGGTTAG   | miRNA | miR-1827 |
| t0043210 | 19 | 1 TGAGGGGAGTAGATTGCAGT        | miRNA | miR-1827 |
| t0043681 | 20 | 1 TGAGGAAGTAGATTGTATTT        | miRNA | miR-1827 |
| t0044421 | 22 | 1 ATGAGGGGAGTAGATTGTATAGT     | miRNA | miR-1827 |
| t0045033 | 21 | 1 TGAGGGGAGTAGATTGTAGTTT      | miRNA | miR-1827 |
| t0045054 | 22 | 1 TGTGGGAGTAGATTGTATAGTT      | miRNA | miR-1827 |
| t0045081 | 21 | 1 TGAGGGGAGTAGATTTTATAGT      | miRNA | miR-1827 |
| t0045207 | 22 | 1 CTGAGGGGAGTAGATTGTATAGT     | miRNA | miR-1827 |
| t0045743 | 24 | 1 TGAGGGGAGTAGATTGTATAGTTAT   | miRNA | miR-1827 |
| t0045810 | 19 | 1 TGGGGGAGTAGATTGTATA         | miRNA | miR-1827 |
| t0047344 | 22 | 1 TAAGGGGAGTAGATTGTATAGTT     | miRNA | miR-1827 |
| t0047748 | 23 | 1 TGAGGGGAGTAGATTGAATAGTTG    | miRNA | miR-1827 |
| t0047879 | 20 | 1 TGAGGGGAGTAGAGTGTATAG       | miRNA | miR-1827 |
| t0048807 | 19 | 1 TGGGGGAGTAGATTGTATAG        | miRNA | miR-1827 |
| t0048828 | 23 | 1 TGAGGCAGTAGATTGTATAGGTG     | miRNA | miR-1827 |
| t0048986 | 26 | 1 TGAGGGGAGTAGGTTGTATGGTTATCT | miRNA | miR-1827 |
| t0049286 | 21 | 1 TGAGGGGAGTAGATTGTATGTT      | miRNA | miR-1827 |
| t0049770 | 20 | 1 TGAGGAAGTAGATTGTATAC        | miRNA | miR-1827 |
| t0050728 | 23 | 1 TGAGGGGAGTAGATTGTATAGTTC    | miRNA | miR-1827 |
| t0051085 | 21 | 1 TGAGGGGAGTAGATCGTATAGA      | miRNA | miR-1827 |
| t0051458 | 20 | 1 TGAGGGGAGTAGATTGTGGAG       | miRNA | miR-1827 |
| t0051468 | 21 | 1 TGAGGGGAGTAGATTGGATAGG      | miRNA | miR-1827 |
| t0052159 | 20 | 1 AGGCAGTAGATTGTATAGTG        | miRNA | miR-1827 |
| t0053474 | 23 | 1 TGAGGGGAGTAGGTTGTATGGTTA    | miRNA | miR-1827 |
| t0054038 | 21 | 1 TGAGGGGAGTAGATTGTAGAGT      | miRNA | miR-1827 |
| t0054170 | 21 | 1 TGAGGGGAGTAGATTGTATGGT      | miRNA | miR-1827 |
| t0054777 | 20 | 1 TGAGGGGAGTAGATTGTATAT       | miRNA | miR-1827 |
| t0055200 | 20 | 1 TGAGGGGAGTAGATTGGATAG       | miRNA | miR-1827 |
| t0055369 | 20 | 1 TGAGGGGAGTAGTTTGTGTTG       | miRNA | miR-1827 |
| t0055384 | 22 | 1 TTGAGGGGAGTAGATTGTATAGT     | miRNA | miR-1827 |
| t0056552 | 21 | 1 TGAGGGGAATAGATTGAATAGT      | miRNA | miR-1827 |
| t0056656 | 24 | 1 TGAGGGGAGTAGGTTGTATGGAATC   | miRNA | miR-1827 |
| t0057072 | 19 | 1 TAGGGGAGTAGATTGTATAG        | miRNA | miR-1827 |
| t0057198 | 20 | 1 TGAGGGGAGTAGATTGCATGT       | miRNA | miR-1827 |
| t0057361 | 22 | 1 TGAGGGGAGTAGATTGTGCTGTT     | miRNA | miR-1827 |
| t0057782 | 21 | 1 TGAGAGAGTAGATTGTATAGT       | miRNA | miR-1827 |
| t0058605 | 25 | 1 TGAGGGGAGTAGGTTGTATGGCTATC  | miRNA | miR-1827 |
| t0058650 | 21 | 1 TGAGGGGAGGAGATTGTATTGT      | miRNA | miR-1827 |



|          |    |                                |       |          |
|----------|----|--------------------------------|-------|----------|
| t0059002 | 21 | 1 TGAGGAAGTAGATTGTATAAT        | miRNA | miR-1827 |
| t0059643 | 21 | 1 TGAGGGAGTTGATTGTATAGT        | miRNA | miR-1827 |
| t0059686 | 22 | 1 GAGGGAGTAGATTGTATAGTTT       | miRNA | miR-1827 |
| t0060294 | 25 | 1 TGAGGGGAGTAGATTGTATAGTACGG   | miRNA | miR-1827 |
| t0060468 | 24 | 1 TGAGGGGAGTAGATTGTATAGTTGT    | miRNA | miR-1827 |
| t0060749 | 20 | 1 TGAGGGGAGCAGATTGTATAG        | miRNA | miR-1827 |
| t0060795 | 20 | 1 TGGGGTAGTAGATTGTATTT         | miRNA | miR-1827 |
| t0061318 | 20 | 1 TGAGGGGAGTAGATTGAATAC        | miRNA | miR-1827 |
| t0061783 | 20 | 1 TGGGGGAGTAGATTGTATAG         | miRNA | miR-1827 |
| t0061826 | 21 | 1 TGAGGGGAGTAGATAGTATAGT       | miRNA | miR-1827 |
| t0063186 | 22 | 1 TGAGGGGAGTAGGTTGTATATTT      | miRNA | miR-1827 |
| t0063681 | 22 | 1 TGAGGGGAGTAGATTGGCTAGTT      | miRNA | miR-1827 |
| t0064813 | 22 | 1 TGAGGAAGTAGATTGTATAGTG       | miRNA | miR-1827 |
| t0064918 | 24 | 1 TGAGGGGAGGAGATTGTATAGTTAA    | miRNA | miR-1827 |
| t0065506 | 23 | 1 TGAGGGGGTAGATTGTATAGTTA      | miRNA | miR-1827 |
| t0065534 | 23 | 1 TGAGGGGAGGAGATTGTATAGTTT     | miRNA | miR-1827 |
| t0066184 | 22 | 1 TGAGGGGAGTAGATGGTATAGTT      | miRNA | miR-1827 |
| t0066533 | 22 | 1 TGAGGGGAGTAGTTTGTACACTT      | miRNA | miR-1827 |
| t0066693 | 18 | 1 TGAGGGGAGTAGATTATAG          | miRNA | miR-1827 |
| t0066989 | 21 | 1 TCAGGGGAGTAGATTGTATAGT       | miRNA | miR-1827 |
| t0067610 | 22 | 1 TGAGGGGACTAGATTGTATAGTT      | miRNA | miR-1827 |
| t0068119 | 22 | 1 TGAGGGGTTAGATTGTATAGTT       | miRNA | miR-1827 |
| t0068773 | 21 | 1 TGGGGTAGTAGATTGTATGTT        | miRNA | miR-1827 |
| t0068806 | 25 | 1 TGAGGGGAGTAGATTGTATAGTTATC   | miRNA | miR-1827 |
| t0069392 | 23 | 1 CTGAGGGGAGTAGATTGTATAGTT     | miRNA | miR-1827 |
| t0069856 | 21 | 1 TGAGGGGAGTAGATTGTATAAC       | miRNA | miR-1827 |
| t0070572 | 20 | 1 TGCGGGGAGTAGATTGTATAG        | miRNA | miR-1827 |
| t0070641 | 20 | 1 TGAGGGGAGTAGGTTGGATAG        | miRNA | miR-1827 |
| t0070836 | 20 | 1 TGAGGGGAGTAGATTGTATGT        | miRNA | miR-1827 |
| t0070987 | 20 | 1 TGAGGGGAAGAGATTGTATAG        | miRNA | miR-1827 |
| t0071113 | 18 | 1 TGAGGGGAGTAGGTTGTAT          | miRNA | miR-1827 |
| t0071482 | 27 | 1 TGAGGGGAGTAGATTGTATAGTGGCCGA | miRNA | miR-1827 |
| t0071483 | 20 | 1 TGAGGGGAGTAGTTTGTATAG        | miRNA | miR-1827 |
| t0071753 | 20 | 1 TGAGGGGAGTAGATTGTACTT        | miRNA | miR-1827 |
| t0072457 | 21 | 1 TGAGGGGAGTAGTTTGTACAGG       | miRNA | miR-1827 |
| t0072973 | 21 | 1 TGAGGGGAGTAGATTGTAATGT       | miRNA | miR-1827 |
| t0073352 | 21 | 1 TGAGGGGAGTAGGTTGTTTAGT       | miRNA | miR-1827 |
| t0073385 | 22 | 1 TGACGGGAGTAGATTGTATAGTT      | miRNA | miR-1827 |
| t0073413 | 22 | 1 TGAGGGGAGTAGATAGTATAGTT      | miRNA | miR-1827 |
| t0073772 | 22 | 1 TGCGGGGAGTAGGTTGTATAGTT      | miRNA | miR-1827 |
| t0073825 | 21 | 1 TGAGGGGAGTAGATTGTGTGGT       | miRNA | miR-1827 |
| t0074776 | 20 | 1 TGAGGGGAGTAGATTGCATAG        | miRNA | miR-1827 |
| t0075120 | 22 | 1 TGAGGCAGTAGATTGTATCGTT       | miRNA | miR-1827 |
| t0075153 | 19 | 1 TGAGGGGAGTAGATTGTATT         | miRNA | miR-1827 |
| t0075980 | 22 | 1 TGAGGGTGTAGATTGTATAGTT       | miRNA | miR-1827 |
| t0076211 | 20 | 1 TGAGGGGAGTAGATTGTGCAG        | miRNA | miR-1827 |
| t0076592 | 24 | 1 TGAGGGGAGTAGGTTGTATGGTATC    | miRNA | miR-1827 |
| t0077015 | 22 | 1 TGAGGGGAGTAGTTTGTGTTGTT      | miRNA | miR-1827 |
| t0078498 | 22 | 1 TGAGGAAGAAGATTGTATAGGT       | miRNA | miR-1827 |
| t0078665 | 21 | 1 TGAGGTCGTAGATTGTATGTT        | miRNA | miR-1827 |
| t0078672 | 19 | 1 TGAGGGGAGTAGGTTGTAGT         | miRNA | miR-1827 |
| t0079049 | 22 | 1 TGAGGGGAGTAGATTCTATAGTT      | miRNA | miR-1827 |
| t0079099 | 21 | 1 GAGGAAGTAGATTGTATAGGT        | miRNA | miR-1827 |
| t0080304 | 21 | 1 TGACGGGAGTAGATTGTATAGT       | miRNA | miR-1827 |
| t0080415 | 21 | 1 TAAGGGGAGTAGATTGTATAGT       | miRNA | miR-1827 |
| t0080714 | 21 | 1 TGAGGGGAGTAGCTTGTATAGT       | miRNA | miR-1827 |
| t0083554 | 20 | 1 TGAAGTAGTAGATTGTATGT         | miRNA | miR-1827 |
| t0084052 | 22 | 1 TGAGGCAGTAGATTGTATAGCT       | miRNA | miR-1827 |

|          |    |                                 |       |             |
|----------|----|---------------------------------|-------|-------------|
| t0084895 | 24 | 1 TGAGGGAGTAGATTGTATAGTTAA      | miRNA | miR-1827    |
| t0085284 | 20 | 1 TGAGGGAGTAGATTCTATAG          | miRNA | miR-1827    |
| t0086468 | 20 | 1 TGAGGGAGTAGATTTTATAG          | miRNA | miR-1827    |
| t0086684 | 21 | 1 TGAGGGAGTTGGTTGTATAGT         | miRNA | miR-1827    |
| t0087885 | 22 | 1 TGAGGGAGTAGATTGAATAGTA        | miRNA | miR-1827    |
| t0088080 | 20 | 1 TGAGGGAGTAGATTGTATTG          | miRNA | miR-1827    |
| t0088711 | 22 | 1 TGAGGAAGTAGATTGTATTGTT        | miRNA | miR-1827    |
| t0089056 | 22 | 1 GGAGGGAGTAGATTGTATAGTT        | miRNA | miR-1827    |
| t0089269 | 21 | 1 TGAGGGAGTAGATTGGATAGT         | miRNA | miR-1827    |
| t0089486 | 22 | 1 TGAGGGAGTAGATTGTATAGAT        | miRNA | miR-1827    |
| t0089720 | 20 | 1 AGGGAGTAGATTGTATAGTT          | miRNA | miR-1827    |
| t0089830 | 21 | 1 TGAGGGAGAAGATTGGATAGT         | miRNA | miR-1827    |
| t0089984 | 22 | 1 TTTGGCAATGGTAGAAATCACA        | miRNA | miR-182     |
| t0090176 | 20 | 1 TTTGGCATTGGTAGAACTCA          | miRNA | miR-182     |
| t0090338 | 28 | 1 TTTGGCAATGGTAGAACTCACACCGATA  | miRNA | miR-182     |
| t0090434 | 22 | 1 TTTGACAATGGTAGAACTCACA        | miRNA | miR-182     |
| t0090939 | 20 | 1 TTTAGCAATGGTAGAACTCA          | miRNA | miR-182     |
| t0090960 | 27 | 1 TTTGGCAATGGTAGAACTCACACTAAA   | miRNA | miR-182     |
| t0091674 | 27 | 1 TTTGGCAATGGTAGAAATCACACTGGA   | miRNA | miR-182     |
| t0091752 | 22 | 1 TTTGGCAATGGTAGAATTCACA        | miRNA | miR-182     |
| t0092069 | 20 | 1 TTTGGCAATGGTAGGACTCA          | miRNA | miR-182     |
| t0092372 | 22 | 1 TTTGGCAATGGTAGAACTTACA        | miRNA | miR-182     |
| t0092608 | 24 | 1 TTTGGCAATGGAAGAACTTACACT      | miRNA | miR-182     |
| t0092610 | 27 | 1 TTTGGCAATGGTAGAACTCACCCCTGAT  | miRNA | miR-182     |
| t0093525 | 20 | 1 TTTGGCAATGGTAGAACCCA          | miRNA | miR-182     |
| t0044828 | 22 | 1 TTTGGCAATGGTGGAACTCACA        | miRNA | miR-182     |
| t0046600 | 29 | 1 TTTGGCAATGGTAGAAATCACACTGGATC | miRNA | miR-182     |
| t0048996 | 23 | 1 TTTGGCAATGGTAGAACTCAAAC       | miRNA | miR-182     |
| t0049755 | 20 | 1 TTTGGCAATGGAAGAATTCA          | miRNA | miR-182     |
| t0050035 | 22 | 1 TGTGGCAATGGTAGAACTCACA        | miRNA | miR-182     |
| t0054396 | 24 | 1 TTTAGCAATGGTAGAACTCACACT      | miRNA | miR-182     |
| t0056991 | 22 | 1 TTTGGCAATGCTAGAACTCACA        | miRNA | miR-182     |
| t0062474 | 24 | 1 TTTGGCAATGGTAGAACTAACACT      | miRNA | miR-182     |
| t0066157 | 22 | 1 ACATTCATTGCTGTCGGTGGGC        | miRNA | miR-181b    |
| t0070878 | 22 | 1 ACATTCATTGCTGTCGGGGGGG        | miRNA | miR-181b    |
| t0078312 | 26 | 1 AACATTCATTGCTGTCGGTGGGAATC    | miRNA | miR-181b    |
| t0079029 | 23 | 1 AACATTCATTGCTGTCGGGGGGT       | miRNA | miR-181b    |
| t0080778 | 20 | 1 AACATTCATTGATGTCGGTG          | miRNA | miR-181b    |
| t0081043 | 23 | 1 AACATTCATTGCTGTCGGTGGGC       | miRNA | miR-181b    |
| t0082001 | 24 | 1 AACATTCATTGTTGTCGGTGGCTC      | miRNA | miR-181b    |
| t0082476 | 19 | 1 AACATTCATTGGTGTCCGGT          | miRNA | miR-181b    |
| t0087051 | 23 | 1 ACATTCATTGCTGTCGGTGGGGT       | miRNA | miR-181b    |
| t0087668 | 20 | 1 TCATCACATTCATTACTGTC          | miRNA | miR-181b    |
| t0091445 | 19 | 1 AACATTCATTGCTGGCGGT           | miRNA | miR-181b    |
| t0091676 | 24 | 1 AACATTCATTGTTGTCGGTGGGGA      | miRNA | miR-181b    |
| t0092203 | 23 | 1 AACATTCATTGCTGTCGGTGGGG       | miRNA | miR-181b    |
| t0044514 | 22 | 1 ACATTCATTGCTGTCGGGGGGT        | miRNA | miR-181b    |
| t0047687 | 22 | 1 AACATTCATTGCTGTCGGGGGGG       | miRNA | miR-181b    |
| t0049644 | 23 | 1 AACATTCATTGCCGTCGGTGGGA       | miRNA | miR-181b    |
| t0050220 | 24 | 1 AACATTCACTGCTGTCGGTGGATC      | miRNA | miR-181b    |
| t0052095 | 23 | 1 GCATTCATTGCTGTCGGTGGGTT       | miRNA | miR-181b    |
| t0053831 | 22 | 1 ACATTCATTGCTGTCGGCGGGT        | miRNA | miR-181b    |
| t0053881 | 23 | 1 AACATTCATTGCTGACGGTGGGT       | miRNA | miR-181b    |
| t0053988 | 24 | 1 AACATTCATTGCTGTCGGGGGATC      | miRNA | miR-181b    |
| t0059469 | 20 | 1 GACATTCATTGCTGTCGGTG          | miRNA | miR-181b    |
| t0060977 | 19 | 1 ACCACTGACTGTTGACTGT           | miRNA | miR-181a-2* |
| t0061467 | 20 | 1 ACCACTGACCCTTGACTGTA          | miRNA | miR-181a-2* |
| t0062997 | 20 | 1 AACACTGACCGTTGACTGTA          | miRNA | miR-181a-2* |

|          |    |                                  |       |             |
|----------|----|----------------------------------|-------|-------------|
| t0065218 | 19 | 1 ACCACTGACCGCTGACTGT            | miRNA | miR-181a-2* |
| t0065253 | 19 | 1 ATCACTGACCGTTGACTGT            | miRNA | miR-181a-2* |
| t0065746 | 18 | 1 ACCACTGAACGTTGACTG             | miRNA | miR-181a-2* |
| t0066384 | 44 | 1 ACCACTGACCGTTGACTGTAACCTTTGAGC | miRNA | miR-181a-2* |
| t0069285 | 19 | 1 ACCACTGAACGTTGACTGT            | miRNA | miR-181a-2* |
| t0070605 | 20 | 1 ACCACTGACCGGTGACTGTA           | miRNA | miR-181a-2* |
| t0083257 | 22 | 1 ATCATTCAACGCTGTCGGTGAG         | miRNA | miR-181a    |
| t0085507 | 24 | 1 AACATTCAACGCTGTCGGTGAATA       | miRNA | miR-181a    |
| t0089131 | 25 | 1 AACATTCAACGTTGTCGGTGAGTTT      | miRNA | miR-181a    |
| t0092052 | 23 | 1 AACATTCAACGCTGTCGGGGAGT        | miRNA | miR-181a    |
| t0046288 | 24 | 1 AACATTCAACGCTGTCGGCGAGTT       | miRNA | miR-181a    |
| t0046513 | 24 | 1 AACATTCAACGCTGACGGTGAATA       | miRNA | miR-181a    |
| t0049417 | 22 | 1 AACATTCAACGCTGTCGGCGAG         | miRNA | miR-181a    |
| t0051901 | 22 | 1 AACATTCAACGATGTCGGGGAG         | miRNA | miR-181a    |
| t0060325 | 22 | 1 AACATTCAACGCTGGCGGTGAG         | miRNA | miR-181a    |
| t0064624 | 22 | 1 AACATTCAACGCTGTCGGTGAC         | miRNA | miR-181a    |
| t0079762 | 22 | 1 AACATTCAACGCTGTTGGTGAG         | miRNA | miR-181a    |
| t0091175 | 23 | 1 AACATTCAACGCTGTCGGAGAGG        | miRNA | miR-181a    |
| t0091776 | 20 | 1 AACATTCAACGCTGCCGGTG           | miRNA | miR-181a    |
| t0041333 | 21 | 1 AACATTCAACGCTGTCGGTG           | miRNA | miR-181a    |
| t0043798 | 24 | 1 AACATTCCACGCTGTCGGTGAGTT       | miRNA | miR-181a    |
| t0044569 | 21 | 1 AACATTCAACACTGTCGGTTA          | miRNA | miR-181a    |
| t0046958 | 20 | 1 AACATTAACGCTGTCGGTG            | miRNA | miR-181a    |
| t0047098 | 22 | 1 AACATTCAACACTGTCGGTGAG         | miRNA | miR-181a    |
| t0047795 | 19 | 1 AACATTCAACGCTGGCGGT            | miRNA | miR-181a    |
| t0049371 | 22 | 1 AACATTGAACGCTGTCGGTGAG         | miRNA | miR-181a    |
| t0050814 | 22 | 1 ACATTCAACGCTGTCGGGGAGT         | miRNA | miR-181a    |
| t0052008 | 22 | 1 AACATTCAACGCTGTAGGTGAG         | miRNA | miR-181a    |
| t0052218 | 23 | 1 AACATTCAACGCTGTCGGTGCGT        | miRNA | miR-181a    |
| t0055620 | 19 | 1 AACATTCAAAGCTGTCGGT            | miRNA | miR-181a    |
| t0056100 | 21 | 1 AACATTCAACGCTGTCAGTGA          | miRNA | miR-181a    |
| t0057196 | 24 | 1 AACATTCAACGCTGTCGGTGCGTT       | miRNA | miR-181a    |
| t0058206 | 22 | 1 AACCTTCAACGCTGTCGGTGAG         | miRNA | miR-181a    |
| t0058225 | 22 | 1 ACATTCAACGCTGTCGGCGAGT         | miRNA | miR-181a    |
| t0062873 | 19 | 1 AACACTCAACGCTGTCGGT            | miRNA | miR-181a    |
| t0066466 | 21 | 1 AACATTCAACGCTGTCGGTTC          | miRNA | miR-181a    |
| t0068743 | 19 | 1 GACATTCAACGCTGTCGGT            | miRNA | miR-181a    |
| t0069481 | 19 | 1 AACATTCAACGCTGTCGGG            | miRNA | miR-181a    |
| t0070418 | 19 | 1 AACATTCAACGCTGTCGGA            | miRNA | miR-181a    |
| t0071147 | 22 | 1 AAAATTCAACGCTGTCGGTGAG         | miRNA | miR-181a    |
| t0071681 | 22 | 1 AACATTCAACGCCGTCGGTGAG         | miRNA | miR-181a    |
| t0074928 | 22 | 1 AACATTCAACGCTGTCGGTTAG         | miRNA | miR-181a    |
| t0075089 | 20 | 1 AACATTCAACGCTGTCGGTG           | miRNA | miR-181a    |
| t0077536 | 22 | 1 AATATTCAACGCTGTCGGTGAG         | miRNA | miR-181a    |
| t0077764 | 19 | 1 AACATTCAACGATGTCGGT            | miRNA | miR-181a    |
| t0078337 | 24 | 1 CAAAGTGCTTATAGTGCAGGTA         | miRNA | miR-17a     |
| t0080159 | 24 | 1 CAAAGTGCTTACAGTGCAGGTCGA       | miRNA | miR-17a     |
| t0080495 | 23 | 1 TCGGGGAGGCGGCCGGCGGGG          | miRNA | miR-1777a   |
| t0083137 | 21 | 1 TCGGGGCGGCCGGCGGTGG            | miRNA | miR-1777a   |
| t0083602 | 20 | 1 TCGGGGCGGCCGGCGGAG             | miRNA | miR-1777a   |
| t0084862 | 20 | 1 TCGGGGCGGCCGGTGGCG             | miRNA | miR-1777a   |
| t0086948 | 18 | 1 TCGGGGCGCCGGCGGCGG             | miRNA | miR-1777a   |
| t0087023 | 20 | 1 TCGGGGCGGCCGGTGGCGG            | miRNA | miR-1777a   |
| t0087733 | 18 | 1 TCGGGGCGGCCGGTGGCGG            | miRNA | miR-1777a   |
| t0088059 | 20 | 1 TCGGGGCGGAGGCGGAGGCG           | miRNA | miR-1777a   |
| t0089005 | 19 | 1 TCGGGGCGGCCGGCGGGG             | miRNA | miR-1777a   |
| t0091955 | 24 | 1 CGGGTTCGGGCGGCCGGCGGG          | miRNA | miR-1777a   |
| t0092171 | 23 | 1 TCGGGGCGGAGGCGGAGGCGGG         | miRNA | miR-1777a   |

|          |    |                            |       |           |
|----------|----|----------------------------|-------|-----------|
| t0066630 | 21 | 1 TCGGGGCGGCGGCGGCGGGGG    | miRNA | miR-1777a |
| t0075043 | 25 | 1 TCGGGGCGGCGGCGGCGGGGGC   | miRNA | miR-1777a |
| t0044211 | 29 | 1 TCGGGGCGGCGGCGGCGGGGGCGG | miRNA | miR-1777a |
| t0044458 | 23 | 1 TAGGGACGGGAGCGCGGGGGGA   | miRNA | miR-1763  |
| t0048429 | 22 | 1 TCGGTGTATGTGCTTGGCTATC   | miRNA | miR-1755  |
| t0055585 | 22 | 1 TTGGTGTATGAGCTTGGCTATC   | miRNA | miR-1755  |
| t0057847 | 22 | 1 ACTGCAGTGAAGGCACTTGTA    | miRNA | miR-17-3p |
| t0060269 | 22 | 1 ACTGCAGTGAAGGCACTTGAT    | miRNA | miR-17-3p |
| t0063014 | 21 | 1 ACTGCAGTGAAGGCACATGTA    | miRNA | miR-17*   |
| t0071332 | 20 | 1 ACTGCAGTGGAGGCACTTGT     | miRNA | miR-17*   |
| t0074907 | 23 | 1 ACTGCAGTGAAGGAACTTGTAGA  | miRNA | miR-17*   |
| t0077411 | 23 | 1 ACTGCAGTGAAGGCGCTTGTAGA  | miRNA | miR-17*   |
| t0077921 | 22 | 1 ACTACAGTGAAGGCACTTGTAG   | miRNA | miR-17*   |
| t0078235 | 19 | 1 ACTGTAGTGAAGGCACTTG      | miRNA | miR-17*   |
| t0080759 | 19 | 1 GAAGTGAAGGCACTTGTAG      | miRNA | miR-17*   |
| t0089355 | 19 | 1 ACTGCGGTGAAGGCACTTG      | miRNA | miR-17*   |
| t0087968 | 23 | 1 ACTGCAGGGAAGGCACTTGTAGA  | miRNA | miR-17*   |
| t0047732 | 23 | 1 ACTCCAGTGAAGGCACTTGTAGA  | miRNA | miR-17*   |
| t0054696 | 22 | 1 ACTGCAATGAAGGCACTTGTAG   | miRNA | miR-17*   |
| t0062542 | 22 | 1 ACTGCAGTGAAGGCCCTTGTAG   | miRNA | miR-17*   |
| t0079707 | 19 | 1 ACTGCAGTGAAGGCACTCG      | miRNA | miR-17*   |
| t0041101 | 19 | 1 ACTGCAGTGAAGGCAATTG      | miRNA | miR-17*   |
| t0046597 | 19 | 1 ACTGCCGTGAAGGCACTTG      | miRNA | miR-17*   |
| t0049219 | 23 | 1 ACTGCAGTGAAGCCACTTGTAGA  | miRNA | miR-17*   |
| t0052715 | 23 | 1 ACTGCAGAGAAGGCACTTGTAGA  | miRNA | miR-17*   |
| t0054299 | 20 | 1 ACTGCAGTGAAGGCCCTTGT     | miRNA | miR-17*   |
| t0054422 | 23 | 1 ACTGCGGTGAAGGCACTTGTAGA  | miRNA | miR-17*   |
| t0057967 | 22 | 1 AAAGTGCTTACAGTGCCGGTAG   | miRNA | miR-17    |
| t0064063 | 24 | 1 CAAAGTGCTTACAGTGCCGGTAG  | miRNA | miR-17    |
| t0073674 | 23 | 1 CAAAGTGCTTACAGTGCACGTAG  | miRNA | miR-17    |
| t0075418 | 23 | 1 CAAAGTGCTTGCAGTGCAGGTAG  | miRNA | miR-17    |
| t0075554 | 23 | 1 CAAGGTGCTTACAGTGCAGGTAG  | miRNA | miR-17    |
| t0076694 | 22 | 1 AAAGTGCTTAGAGTGCAGGTAG   | miRNA | miR-17    |
| t0080914 | 21 | 1 TCAAAGTGCTTACAGGGCAGG    | miRNA | miR-17    |
| t0082497 | 24 | 1 CAAAGTGCTTACAGTGCAGGAAGA | miRNA | miR-17    |
| t0086334 | 22 | 1 AAAGTGATTACAGTGCAGGTAG   | miRNA | miR-17    |
| t0088467 | 24 | 1 CAAGGTGCTTACAGTGCAGGTAGA | miRNA | miR-17    |
| t0092057 | 23 | 1 CAAAGTACTTACAGTGCAGGTAG  | miRNA | miR-17    |
| t0093070 | 21 | 1 CAAAGTGCTTATACTGCAGGT    | miRNA | miR-17    |
| t0093474 | 22 | 1 AAAGCGCTTACAGTGCAGGTAG   | miRNA | miR-17    |
| t0041124 | 24 | 1 CAAAGAGCTTACAGTGCAGGTAGA | miRNA | miR-17    |
| t0041880 | 24 | 1 CAAAGTGATTACAGTGCAGGTAGA | miRNA | miR-17    |
| t0043651 | 22 | 1 GAAAGTGCTTACAGTGCAGGTA   | miRNA | miR-17    |
| t0043731 | 22 | 1 CAAAGCGCTTACAGAGCAGGTA   | miRNA | miR-17    |
| t0044393 | 22 | 1 CAAAGTGCTTACAGGGCAGGTA   | miRNA | miR-17    |
| t0044606 | 21 | 1 CAAAGAGCTTACAGTGCAGGT    | miRNA | miR-17    |
| t0044825 | 20 | 1 CAAAGTACTTACAGTGCAGG     | miRNA | miR-17    |
| t0045259 | 22 | 1 ACAAAGTGCTTACAGTGCCGGT   | miRNA | miR-17    |
| t0045809 | 22 | 1 CAAAGTGCTTACGGTGCAGGTA   | miRNA | miR-17    |
| t0052129 | 23 | 1 CAAAGTGCTTACAGTGCAGGTAG  | miRNA | miR-17    |
| t0058419 | 22 | 1 CAAAGTGCTTACCGTGCAGGTA   | miRNA | miR-17    |
| t0058548 | 21 | 1 CAAAGTGCTTACAGCGCAGGT    | miRNA | miR-17    |
| t0058847 | 21 | 1 CAAAGTGCTTACAGGGCAGGT    | miRNA | miR-17    |
| t0059346 | 21 | 1 CAAAGTGCATACAGTGCAGGT    | miRNA | miR-17    |
| t0061760 | 24 | 1 CAAAGTGTTTACAGTGCAGGTAGA | miRNA | miR-17    |
| t0061888 | 22 | 1 AAAGTGCTTACAGTGCAGGGAG   | miRNA | miR-17    |
| t0062349 | 23 | 1 CAAAGAGCTTACAGTGCAGGTAG  | miRNA | miR-17    |
| t0065980 | 23 | 1 CAAAGTGCTTATAGTGCAGGTAG  | miRNA | miR-17    |

|          |    |                               |       |         |
|----------|----|-------------------------------|-------|---------|
| t0068867 | 23 | 1 CAAAGTGCTTACAGTGCAAGTAG     | miRNA | miR-17  |
| t0069476 | 22 | 1 ACAGTGCTTACAGTGCAAGTAG      | miRNA | miR-17  |
| t0069627 | 22 | 1 CAAAGTGCTTACAGTGAAGCTA      | miRNA | miR-17  |
| t0070098 | 22 | 1 CAAAGGGCTTACAGTGCAAGTA      | miRNA | miR-17  |
| t0070126 | 22 | 1 ACAAAGTGCTTACACTGCAGGT      | miRNA | miR-17  |
| t0070191 | 23 | 1 CAAAGTGCTTACAGGGCAGGTAG     | miRNA | miR-17  |
| t0073763 | 24 | 1 CAAAGTGCTTGCAGTGCAAGTAGA    | miRNA | miR-17  |
| t0074625 | 24 | 1 CAAAATGCTTACAGTGCAAGTAGA    | miRNA | miR-17  |
| t0074733 | 23 | 1 CAAAGTGCTTACAATGCAGGTAG     | miRNA | miR-17  |
| t0075961 | 22 | 1 AAGGTGCTTACAGTGCAAGTAG      | miRNA | miR-17  |
| t0077247 | 24 | 1 CAAAGCGCTTACAGTGCAAGTAGA    | miRNA | miR-17  |
| t0077890 | 22 | 1 TAGTAGCATGTAAATATTGGCG      | miRNA | miR-16c |
| t0078809 | 22 | 1 TAACAGCATGTAAATATTGGCG      | miRNA | miR-16c |
| t0079810 | 19 | 1 TAGCACGTAAATATTGGAG         | miRNA | miR-16c |
| t0081811 | 19 | 1 TAGCACATAAATATTGGCG         | miRNA | miR-16c |
| t0082156 | 19 | 1 CAGCATGTAAGTATTGGCG         | miRNA | miR-16c |
| t0083916 | 19 | 1 TAGCATGTAATATTGGAG          | miRNA | miR-16c |
| t0084414 | 19 | 1 TAGCACGTAAATATAGGCG         | miRNA | miR-16c |
| t0086295 | 19 | 1 TAGCACGAAAATATTGGCG         | miRNA | miR-16c |
| t0086570 | 19 | 1 TAGCACGTAAATATTGACG         | miRNA | miR-16c |
| t0086636 | 22 | 1 TAGCAGCACGCAAATATTGGCA      | miRNA | miR-16b |
| t0087262 | 22 | 1 TAGCAGGACGTAAATATTTGCA      | miRNA | miR-16b |
| t0090077 | 24 | 1 TAGCAGCACGTAAATATTGGCTCT    | miRNA | miR-16b |
| t0091911 | 22 | 1 TAGCAGCACGTAAGTATTGGCT      | miRNA | miR-16b |
| t0040723 | 27 | 1 TAGCAGCACGTAAATATTCGCAATAAC | miRNA | miR-16b |
| t0048542 | 22 | 1 TAGCAGCACGTATATATTGGCT      | miRNA | miR-16b |
| t0051425 | 22 | 1 TAGCAGCACGTAAATATTCGCA      | miRNA | miR-16b |
| t0053442 | 26 | 1 TAGCAGCACGTAAATATTGCTCGTGT  | miRNA | miR-16b |
| t0061528 | 22 | 1 TCGCAGCACGTAAATATTGGCT      | miRNA | miR-16b |
| t0063787 | 24 | 1 TAGCAGCACGTAAATATTGGCATT    | miRNA | miR-16b |
| t0075324 | 25 | 1 TAGCAGCACGTAAATATTGGCCAAA   | miRNA | miR-16b |
| t0078017 | 22 | 1 TAGCGGCACGTAAATATTGGCA      | miRNA | miR-16b |
| t0085282 | 22 | 1 TAGCAGCACGTAAATATTGGCA      | miRNA | miR-16b |
| t0041459 | 22 | 1 TGGCAGCACGTAAATATTGGCA      | miRNA | miR-16b |
| t0042423 | 23 | 1 AAGCAGCACGTAAATATTGGCTT     | miRNA | miR-16b |
| t0042842 | 22 | 1 TAGCAGCACGTCAATATTGGCA      | miRNA | miR-16b |
| t0044116 | 22 | 1 TAGCAGCACATAAATATTGGCT      | miRNA | miR-16b |
| t0046363 | 22 | 1 TAGCAGCACGTAAATTTTGGCA      | miRNA | miR-16b |
| t0049602 | 22 | 1 TAGCAGCAGGTAATATTGGCC       | miRNA | miR-16b |
| t0051527 | 22 | 1 TAACAGCACGTAAATATTGGCT      | miRNA | miR-16b |
| t0053024 | 22 | 1 TAGCAGCACGTAAACATTGGCA      | miRNA | miR-16b |
| t0053165 | 22 | 1 TAGCAGAACGTAAATATTGGAA      | miRNA | miR-16b |
| t0054331 | 22 | 1 TAGCAGCACGTAAATATTGGAT      | miRNA | miR-16b |
| t0055427 | 22 | 1 TAGCAGCACGGAAATATTGGCA      | miRNA | miR-16b |
| t0056805 | 23 | 1 TAGCAGCACGTAAATATTGGCCC     | miRNA | miR-16b |
| t0059203 | 22 | 1 TAGCAGCACGTAAATGTTGGCA      | miRNA | miR-16b |
| t0061172 | 22 | 1 TAGCAGCACGTACATATTGGCT      | miRNA | miR-16b |
| t0061341 | 22 | 1 TAGCAGCACGTGAATATTGGCA      | miRNA | miR-16b |
| t0061722 | 22 | 1 TAGCAGCACGTAAATATCGGCC      | miRNA | miR-16b |
| t0062101 | 22 | 1 TAGCAGCACGTAAATATTGGTC      | miRNA | miR-16b |
| t0062408 | 22 | 1 CAGCAGCACGTAAATATTGGCA      | miRNA | miR-16b |
| t0064190 | 23 | 1 ATAGCAGCACGTAAATATTGGCT     | miRNA | miR-16b |
| t0064635 | 22 | 1 TAGCAGTACGTAAATATTGGCA      | miRNA | miR-16b |
| t0064910 | 22 | 1 TAGCAGCACGTAAACATTGGCT      | miRNA | miR-16b |
| t0065047 | 22 | 1 TAGCATCACGTAAATATTGGCT      | miRNA | miR-16b |
| t0065076 | 22 | 1 TAGCAGCACATAAATATTGGCC      | miRNA | miR-16b |
| t0065457 | 24 | 1 TAGCAGCACGTAAATATTGGCAAG    | miRNA | miR-16b |
| t0065548 | 22 | 1 TAGCAGCACGTAAATATTGGGA      | miRNA | miR-16b |

|          |    |                                |       |           |
|----------|----|--------------------------------|-------|-----------|
| t0065948 | 22 | 1 TAGCAGCACGTAATATGGGCA        | miRNA | miR-16b   |
| t0066038 | 22 | 1 TAGCAGCACGTAATCTTGGCA        | miRNA | miR-16b   |
| t0067053 | 22 | 1 TAGCAGCACGTAATACTATTGGCA     | miRNA | miR-16b   |
| t0070452 | 27 | 1 TAGCAGCACGTAATATTGGCCATAAC   | miRNA | miR-16b   |
| t0071544 | 22 | 1 TAGGAGCACGTAATATTGGCC        | miRNA | miR-16b   |
| t0073360 | 22 | 1 TAGCTGCACGTAATATTGGCA        | miRNA | miR-16b   |
| t0074378 | 22 | 1 TAGCAGCACGTAATACTATTGGCC     | miRNA | miR-16b   |
| t0076307 | 22 | 1 TAGCAGCACGTAATACTGGCT        | miRNA | miR-16b   |
| t0077076 | 22 | 1 TAGCACCACGTAATATTGGCA        | miRNA | miR-16b   |
| t0079159 | 22 | 1 TAGCAGCACGTTAATATTGGCC       | miRNA | miR-16b   |
| t0079907 | 22 | 1 AAGCGGCGATGGCGGAGCTGCA       | miRNA | miR-1636  |
| t0081392 | 25 | 1 AAGCGGCGATGGCGGGGCTGAATTA    | miRNA | miR-1636  |
| t0082709 | 25 | 1 AAGCGGCGATGGCGGAGCTGGATTA    | miRNA | miR-1636  |
| t0084162 | 20 | 1 AAGCGGCGATGGCGGGGCTG         | miRNA | miR-1636  |
| t0084198 | 22 | 1 AAGCGGCGATGGCGGAGATGAA       | miRNA | miR-1636  |
| t0085857 | 24 | 1 GAAGCGGCGATGGCGGAGCTGGAA     | miRNA | miR-1636  |
| t0086276 | 20 | 1 AAGCGGCGATGGCGGAGCCG         | miRNA | miR-1636  |
| t0087256 | 24 | 1 GAAGCGGCGATGGCGGGGCTGAAA     | miRNA | miR-1636  |
| t0089356 | 22 | 1 CAGCGGCGCTGGCGGGGCTGAA       | miRNA | miR-1636  |
| t0091657 | 24 | 1 GAAGCGGCGATGGCGGAGATGAAA     | miRNA | miR-1636  |
| t0091775 | 22 | 1 AAGCGGCGATGGCGGCGCTGAA       | miRNA | miR-1636  |
| t0092195 | 24 | 1 GAAGCGGCGATGGCGGAGCGGAAA     | miRNA | miR-1636  |
| t0092584 | 22 | 1 AAGCGGCGATGGCGGAGCTTAA       | miRNA | miR-1636  |
| t0042319 | 20 | 1 CCAATATTACTATGCTGCTT         | miRNA | miR-16-2* |
| t0047589 | 20 | 1 CCAATATTACTGGGCTGCTT         | miRNA | miR-16-2* |
| t0051009 | 24 | 1 GCGGGGCGGGTCGGGCGGCGGCG      | miRNA | miR-1607  |
| t0052205 | 19 | 1 TGGGGGCGGGGGGCGGTCG          | miRNA | miR-1607  |
| t0056583 | 26 | 1 TGGGGGCGGGGAGCGGGCGGGCGGTT   | miRNA | miR-1607  |
| t0064613 | 29 | 1 GGGGGCGGGGAGCGGTTCGGGCGGCGGA | miRNA | miR-1607  |
| t0068000 | 27 | 1 GGCGGGGAGCGGGCCGGGCGGCGGGG   | miRNA | miR-1607  |
| t0070511 | 27 | 1 GGCGGGGAGCGGGCGGGCGGCGGCGG   | miRNA | miR-1607  |
| t0073684 | 26 | 1 CTGGGGGCGGGGAGCGGCCGGGCGGC   | miRNA | miR-1607  |
| t0074222 | 28 | 1 GGCGGGGAGCGGTTCGGGCGGCGGCGG  | miRNA | miR-1607  |
| t0078327 | 26 | 1 GGGGCGGGGAGCGGTTGGGCGGCGGC   | miRNA | miR-1607  |
| t0080036 | 26 | 1 GGGGCGGGGAGCGGTTCGGGCGGCGGG  | miRNA | miR-1607  |
| t0085089 | 26 | 1 GCTGGGGGCGGGGAGCGGTTCGGGGG   | miRNA | miR-1607  |
| t0063826 | 26 | 1 GGGGGCGGGGAGCGGTTCGGGCGGGG   | miRNA | miR-1607  |
| t0067483 | 18 | 1 GGGGGCGGGGAGAGGTCC           | miRNA | miR-1607  |
| t0046483 | 27 | 1 GGGCGGGGAGCGGTTCGGGCGGCGGCGG | miRNA | miR-1607  |
| t0047205 | 25 | 1 GGGGGCGGGGAGCGGTTCGGGCGGCG   | miRNA | miR-1607  |
| t0048364 | 30 | 1 GGGGGCGGGGAGCGGTAGGGCGGCGGC  | miRNA | miR-1607  |
| t0052341 | 21 | 1 GCGGGGAGCGGTTGGGGGCG         | miRNA | miR-1607  |
| t0053244 | 24 | 1 GCGGGGAGCGGTTCGGGAGCGGCG     | miRNA | miR-1607  |
| t0057552 | 28 | 1 GGCGGGGAGCGGTTCGGGCGGCGGCGGT | miRNA | miR-1607  |
| t0060295 | 28 | 1 GGGGCGGGGAGCGGCCGGGCGGCGGCG  | miRNA | miR-1607  |
| t0060482 | 27 | 1 GGCGGGGGGCGGTTCGGGCGGCGGCGGT | miRNA | miR-1607  |
| t0060573 | 22 | 1 GGGGGCGGGGAGCGGTAGGGCG       | miRNA | miR-1607  |
| t0062086 | 27 | 1 GCGGCGGGGAGCGGTTCGGGCGGCGGCG | miRNA | miR-1607  |
| t0062730 | 26 | 1 TGGGGGCGGGGAGCGGGCGGGCGGCG   | miRNA | miR-1607  |
| t0066653 | 26 | 1 TGGGGGCGGGGAGCGGTAGGGAGGCG   | miRNA | miR-1607  |
| t0067231 | 24 | 1 GGGGCGGGGAGCGGGCGGGCGGCG     | miRNA | miR-1607  |
| t0071911 | 26 | 1 TGGGGGCGGGGAGCGGTTCGGGCGGGT  | miRNA | miR-1607  |
| t0072386 | 24 | 1 GGGGCGGGGGGCGGTTCGGGCGGCG    | miRNA | miR-1607  |
| t0072600 | 22 | 1 TAGCGGAACGTAATATTGGCG        | miRNA | miR-16    |
| t0072801 | 21 | 1 AGCAGCACGTGAATATTGGCG        | miRNA | miR-16    |
| t0075113 | 21 | 1 TAGCAGCACGTAATAATGGT         | miRNA | miR-16    |
| t0075921 | 24 | 1 TAGCAGCACGTAATATTTCGCGTA     | miRNA | miR-16    |
| t0081745 | 24 | 1 TAGCAGCACGTAACATTGGCGAA      | miRNA | miR-16    |

|          |    |                               |       |        |
|----------|----|-------------------------------|-------|--------|
| t0083191 | 22 | 1 TATCAGCACGGAAATATTGGCG      | miRNA | miR-16 |
| t0083583 | 24 | 1 TAGCACCACGTAATATTGGCGAA     | miRNA | miR-16 |
| t0084163 | 22 | 1 TTGAAGCACGTAATATTGGCG       | miRNA | miR-16 |
| t0086173 | 22 | 1 TCGCAGCACGTAATCTTGGCG       | miRNA | miR-16 |
| t0089216 | 23 | 1 TAGCAGCACGTACATATTGGCGA     | miRNA | miR-16 |
| t0089837 | 22 | 1 TAGCAGCGCTTAAATATTGGCG      | miRNA | miR-16 |
| t0090035 | 22 | 1 TAGCAGGACGTAATATTGGTG       | miRNA | miR-16 |
| t0091933 | 20 | 1 TAGCAGCACGTAATACTGG         | miRNA | miR-16 |
| t0040688 | 22 | 1 TAGCAGCACGCAAATATTGACG      | miRNA | miR-16 |
| t0040708 | 21 | 1 AGCAGCACGTAATGTTGGCG        | miRNA | miR-16 |
| t0041001 | 24 | 1 TAGCAGCACATAAATATTGGCGTA    | miRNA | miR-16 |
| t0041109 | 22 | 1 TAGCAGCACGTAATTATTGGTG      | miRNA | miR-16 |
| t0041162 | 24 | 1 TAGGAGCACGTAATATTGGCGTA     | miRNA | miR-16 |
| t0041368 | 21 | 1 AGCAGTACGTAATATTGGCG        | miRNA | miR-16 |
| t0041470 | 22 | 1 TAGCAGCACGGAAATCTTGGCG      | miRNA | miR-16 |
| t0041516 | 23 | 1 TAGCAGCATGTAATATTGGCGT      | miRNA | miR-16 |
| t0041895 | 22 | 1 TAGCAGCACGTAATACTGGTG       | miRNA | miR-16 |
| t0041936 | 21 | 1 TAGAAGCACGTAATATTGGA        | miRNA | miR-16 |
| t0042076 | 20 | 1 TAGCTGCACGTAATATTGG         | miRNA | miR-16 |
| t0042155 | 23 | 1 TAGCAGCACGTAATATAGGCGT      | miRNA | miR-16 |
| t0042167 | 23 | 1 TAGCATCACGTAATATTGGCGA      | miRNA | miR-16 |
| t0042226 | 31 | 1 TAGCAGCACGTAATATTGGCGAAAAAA | miRNA | miR-16 |
| t0042361 | 22 | 1 TAGCAGCAAGTAAATTTTGGCG      | miRNA | miR-16 |
| t0042371 | 22 | 1 TCGCAGCACGTACATATTGGCG      | miRNA | miR-16 |
| t0042499 | 21 | 1 TAGCAGTACGTAATATTGGC        | miRNA | miR-16 |
| t0042548 | 22 | 1 TAGCAGCACGTAATGTTTGGCG      | miRNA | miR-16 |
| t0042816 | 24 | 1 TAGGAGCACGTAATATTGGCGAA     | miRNA | miR-16 |
| t0043303 | 20 | 1 TAGCAGCAAGTAAAATTGG         | miRNA | miR-16 |
| t0043532 | 20 | 1 AAGCAGGACGTAATATTGG         | miRNA | miR-16 |
| t0043687 | 23 | 1 ATAGCAGCACGTAATATTAGCG      | miRNA | miR-16 |
| t0043948 | 22 | 1 TAGAAGCACGTTAATATTGGCG      | miRNA | miR-16 |
| t0044268 | 22 | 1 TAGCAGCATGTAATATTAGCG       | miRNA | miR-16 |
| t0044293 | 20 | 1 TAGCAACACGTAACTATTGG        | miRNA | miR-16 |
| t0044578 | 22 | 1 TAGCAGCACATAAATATTAGCG      | miRNA | miR-16 |
| t0044631 | 22 | 1 TAGCAGTACGTAATATTTCGCG      | miRNA | miR-16 |
| t0044822 | 24 | 1 ATAGCAGCACATAAATATTGGCGT    | miRNA | miR-16 |
| t0044882 | 21 | 1 AGCAGCACGTAATATTGGGG        | miRNA | miR-16 |
| t0044919 | 22 | 1 TAGAAGCACGGAAATATTGGCG      | miRNA | miR-16 |
| t0045052 | 22 | 1 TAGCAGAACGTAACTATTGGCG      | miRNA | miR-16 |
| t0045194 | 22 | 1 TAGCAGCACGTATATATTGCCG      | miRNA | miR-16 |
| t0045501 | 23 | 1 ATAGCAGCTCGTAATATTGGCG      | miRNA | miR-16 |
| t0045525 | 22 | 1 TAGCAGCACGTAAGTATTGTCG      | miRNA | miR-16 |
| t0045636 | 20 | 1 TCGCAGCACGTAATATTGG         | miRNA | miR-16 |
| t0045653 | 25 | 1 TAGCAGCACGTAATATTGGTGTA     | miRNA | miR-16 |
| t0045715 | 22 | 1 TAGCCGCACGTAATCTTGGCG       | miRNA | miR-16 |
| t0045726 | 23 | 1 TAGCAGCACGTAATATTTCGCGA     | miRNA | miR-16 |
| t0045760 | 24 | 1 TGGCAGCACGTAATATTGGCGTT     | miRNA | miR-16 |
| t0045776 | 22 | 1 TAGCAGCACGCAAATATTTCGCG     | miRNA | miR-16 |
| t0045898 | 24 | 1 TAGCAGCACGTAATTATTGGCGAA    | miRNA | miR-16 |
| t0045922 | 20 | 1 TAGCAGAACGTAATATTTG         | miRNA | miR-16 |
| t0046023 | 20 | 1 TACCAACACGTAATATTGG         | miRNA | miR-16 |
| t0046033 | 24 | 1 TAGCAGCGCGTAATATTGGCGAG     | miRNA | miR-16 |
| t0046564 | 22 | 1 TAGCAGCGCGTAATATTGCCG       | miRNA | miR-16 |
| t0046817 | 22 | 1 TAGCAGTACGGAATATTGGCG       | miRNA | miR-16 |
| t0047053 | 23 | 1 TAGCAGCACGTAATATTGGTGT      | miRNA | miR-16 |
| t0047224 | 24 | 1 TAGCAGCAAGTAATATTGGCGAA     | miRNA | miR-16 |
| t0047251 | 22 | 1 TTGCAGCACGGAAATATTGGCG      | miRNA | miR-16 |
| t0047336 | 22 | 1 TAGCAGCACGCAACTATTGGCG      | miRNA | miR-16 |

|          |    |                               |       |        |
|----------|----|-------------------------------|-------|--------|
| t0047488 | 24 | 1 TAGCAGCACGTAATATTGACGAA     | miRNA | miR-16 |
| t0047604 | 20 | 1 TAGCAGCACGTAAGATTGG         | miRNA | miR-16 |
| t0047756 | 19 | 1 CAGCACGTAATATTGGCG          | miRNA | miR-16 |
| t0047945 | 22 | 1 TGGCAGCACGTAATATTGTCTG      | miRNA | miR-16 |
| t0048262 | 24 | 1 TAGCAACACGTAATATTGGCGTA     | miRNA | miR-16 |
| t0048317 | 22 | 1 TAGCAGGATGTAATATTGGCG       | miRNA | miR-16 |
| t0048428 | 22 | 1 CAGCTGCACGTAATATTGGCG       | miRNA | miR-16 |
| t0048504 | 22 | 1 TAGCAGCAGGCAAATATTGGCG      | miRNA | miR-16 |
| t0049097 | 22 | 1 CAGCAGCACGTAATATTGTCTG      | miRNA | miR-16 |
| t0049217 | 22 | 1 TAGCAGCAGGTAATATTGGTG       | miRNA | miR-16 |
| t0049337 | 22 | 1 TAGCAGTAGGTAATATTGGCG       | miRNA | miR-16 |
| t0049388 | 22 | 1 TAGCAGCACGTAATATTACCG       | miRNA | miR-16 |
| t0049635 | 22 | 1 TAGCAGCACGTACATATTGGAG      | miRNA | miR-16 |
| t0049885 | 22 | 1 TAGCAGCAAGTAATATTTGCG       | miRNA | miR-16 |
| t0049927 | 20 | 1 GCAGCACGTAATATTGGAG         | miRNA | miR-16 |
| t0049989 | 22 | 1 TAGCATCACGTAATATTGGGG       | miRNA | miR-16 |
| t0050340 | 20 | 1 TAGCAGCACGTAACCATTGG        | miRNA | miR-16 |
| t0050631 | 20 | 1 GCAGCACGTAACATTGGCG         | miRNA | miR-16 |
| t0050879 | 25 | 1 TAGCAGCACGTAATATTGACGAAA    | miRNA | miR-16 |
| t0050937 | 20 | 1 TAGCAGCACGTAATAAATGG        | miRNA | miR-16 |
| t0050940 | 22 | 1 TAGCAGGAAGTAATATTGGCG       | miRNA | miR-16 |
| t0051005 | 20 | 1 TACAGCACGTAATATTGGC         | miRNA | miR-16 |
| t0051083 | 24 | 1 TAGCAGCACGTAATGTTGGCGAA     | miRNA | miR-16 |
| t0051177 | 23 | 1 TAGCAGCACGTAATATTGACGA      | miRNA | miR-16 |
| t0051774 | 22 | 1 TAGCAGTACGTAATATTGCCG       | miRNA | miR-16 |
| t0051848 | 25 | 1 GAGTAGCAGCACGTAACACTATTGGCG | miRNA | miR-16 |
| t0051849 | 22 | 1 TAGGAGCAAGTAATATTGGCG       | miRNA | miR-16 |
| t0051890 | 22 | 1 TAAGAGCACGTAATATTGGCG       | miRNA | miR-16 |
| t0051973 | 23 | 1 TAGCAGCACGTAACATTGGCGA      | miRNA | miR-16 |
| t0052118 | 22 | 1 TAGCAGCATGTAATATAGGCG       | miRNA | miR-16 |
| t0052156 | 25 | 1 TAGAAGCACGTAATATTGGCGACA    | miRNA | miR-16 |
| t0052484 | 21 | 1 TAGCAGCAAGTAATATTGGC        | miRNA | miR-16 |
| t0052838 | 22 | 1 TAGCAGCACGTAACACTATTGGAG    | miRNA | miR-16 |
| t0052897 | 24 | 1 TAGCAGCACGTAATATTGGAGAT     | miRNA | miR-16 |
| t0053002 | 23 | 1 ATAGCAGCAAGTAATATTGGCG      | miRNA | miR-16 |
| t0053015 | 23 | 1 ATAGCAGCACGTAATAATGGCG      | miRNA | miR-16 |
| t0053082 | 22 | 1 TAGCAGAACGTACATATTGGCG      | miRNA | miR-16 |
| t0053083 | 22 | 1 GAGGAGCACGTAATATTGGCG       | miRNA | miR-16 |
| t0053273 | 22 | 1 TAACAGCACGTAATATTTGCG       | miRNA | miR-16 |
| t0053387 | 22 | 1 TAGCAGCACGTAATATCGTCTG      | miRNA | miR-16 |
| t0053655 | 21 | 1 AGCAGCACGTAACACTATTGGCG     | miRNA | miR-16 |
| t0053674 | 22 | 1 TAGCAGCACGTCAATGTTGGCG      | miRNA | miR-16 |
| t0053766 | 22 | 1 TAGCAGCACGAAAATATTTGCG      | miRNA | miR-16 |
| t0053848 | 21 | 1 AGCCGCCCGTAATATTGGCG        | miRNA | miR-16 |
| t0054227 | 24 | 1 TAGCAGCATGTAATATTGGCGTT     | miRNA | miR-16 |
| t0054382 | 24 | 1 TAGCAGTAGGTAATATTGGCGAT     | miRNA | miR-16 |
| t0054409 | 23 | 1 ATAGCAGCACGTAAGTATTGGCG     | miRNA | miR-16 |
| t0054431 | 21 | 1 AGCAGCACCTAATATTGGCG        | miRNA | miR-16 |
| t0054583 | 18 | 1 TAGCAGAACGTAATATT           | miRNA | miR-16 |
| t0054695 | 21 | 1 TAGCGGCACGTAATATTTGC        | miRNA | miR-16 |
| t0054738 | 21 | 1 GAGCAGCACGTAATATTGGC        | miRNA | miR-16 |
| t0054741 | 22 | 1 TAGCAGCACGTACATATTGTCTG     | miRNA | miR-16 |
| t0055323 | 23 | 1 TAGCAGCACGTAACATTGGCGT      | miRNA | miR-16 |
| t0055838 | 24 | 1 TAGCAGAACGTAATATTGGCGAG     | miRNA | miR-16 |
| t0055844 | 24 | 1 TAGCAGCACGTCAATATTGGCGAG    | miRNA | miR-16 |
| t0055921 | 23 | 1 TAGCAGCACGTAATTTTGGCGT      | miRNA | miR-16 |
| t0055941 | 22 | 1 TAGCAGCCCGTAATATTGGTG       | miRNA | miR-16 |
| t0056196 | 22 | 1 TAGCAGCACTTAATATTGGAG       | miRNA | miR-16 |



|          |    |                                |       |        |
|----------|----|--------------------------------|-------|--------|
| t0056374 | 22 | 1 TAGCAGTACGTCAATATTGGCG       | miRNA | miR-16 |
| t0056797 | 22 | 1 TAGCAGCACCTAAATATTGTCG       | miRNA | miR-16 |
| t0056875 | 22 | 1 TAGCAGCACGTAATCTTGGAG        | miRNA | miR-16 |
| t0057034 | 22 | 1 TAGGAGCACGTAATGTTGGCG        | miRNA | miR-16 |
| t0057281 | 22 | 1 GAGCAGCACGTAATATTGGAG        | miRNA | miR-16 |
| t0057292 | 22 | 1 TAGCAGACCGTAAATATTGGCG       | miRNA | miR-16 |
| t0057389 | 22 | 1 TAGCAGCCCGGAAATATTGGCG       | miRNA | miR-16 |
| t0057434 | 22 | 1 TAGAAGCACGTAATAATGGCG        | miRNA | miR-16 |
| t0057456 | 22 | 1 TAGCAGCATGTAATAATGGCG        | miRNA | miR-16 |
| t0057488 | 23 | 1 TAGCAACACGTAATATTGGCGT       | miRNA | miR-16 |
| t0057609 | 23 | 1 TAGCAGCACGTACCTATTGGCGC      | miRNA | miR-16 |
| t0057641 | 21 | 1 AGCAGCCCGTAAATATTGGCG        | miRNA | miR-16 |
| t0057644 | 44 | 1 TAGCAGCACGTAATATTGGCGTGGTTTG | miRNA | miR-16 |
| t0057889 | 20 | 1 TGCAGCACGTAATGTTGGC          | miRNA | miR-16 |
| t0057926 | 25 | 1 TAGCAGCACGTAATATGGGCGAAA     | miRNA | miR-16 |
| t0057969 | 19 | 1 TAGCAGCACGTAACTATTG          | miRNA | miR-16 |
| t0058071 | 22 | 1 TAGCAGCACGTAATAATGCCG        | miRNA | miR-16 |
| t0058429 | 24 | 1 TAGCAACACGTAATATTGGCGAA      | miRNA | miR-16 |
| t0058633 | 22 | 1 TAGCAGCATGTGAATATTGGCG       | miRNA | miR-16 |
| t0058799 | 22 | 1 TAGCATCACGTAACTATTGGCG       | miRNA | miR-16 |
| t0058900 | 21 | 1 TGCAGCACATAAATATTGGCG        | miRNA | miR-16 |
| t0059049 | 24 | 1 TAGCAGCACGTAATAATGGCGAA      | miRNA | miR-16 |
| t0059146 | 22 | 1 TAGCAGCACGTAATACCGGCG        | miRNA | miR-16 |
| t0059391 | 22 | 1 TAGTAGCACGTAATATTGCCG        | miRNA | miR-16 |
| t0059713 | 19 | 1 TAGCAGCACGTGAATATGG          | miRNA | miR-16 |
| t0059976 | 22 | 1 TAGCAGCAAGTAAATATTGGGG       | miRNA | miR-16 |
| t0060106 | 22 | 1 TAGCAGCATGTAACATTGGCG        | miRNA | miR-16 |
| t0060262 | 25 | 1 GAATAGCAGCACGTAATATTGGCG     | miRNA | miR-16 |
| t0060341 | 24 | 1 TTTTGTAGCACCGTAAATATTGG      | miRNA | miR-16 |
| t0060729 | 22 | 1 TAGCAGAACGCAAATATTGGCG       | miRNA | miR-16 |
| t0060822 | 22 | 1 TAGAAGCACGTAATATAGGCG        | miRNA | miR-16 |
| t0060921 | 23 | 1 ATAGCAGCACGTAGATATTGGTG      | miRNA | miR-16 |
| t0061118 | 19 | 1 TAGCAGCACGTAATATCG           | miRNA | miR-16 |
| t0061471 | 24 | 1 TAGCAGCACGTAATATCGGCGAA      | miRNA | miR-16 |
| t0061512 | 24 | 1 AATAGCAGCACGTAATCTTGGCG      | miRNA | miR-16 |
| t0061638 | 22 | 1 TAGAAGCACGTAATATTGGGG        | miRNA | miR-16 |
| t0061660 | 23 | 1 TAGCAGCACGTACATATTGGCGT      | miRNA | miR-16 |
| t0061765 | 23 | 1 ATGGCAGCACGTAATATTGGCG       | miRNA | miR-16 |
| t0061850 | 19 | 1 TAGCAGCACGTAATATTA           | miRNA | miR-16 |
| t0061976 | 24 | 1 ATAGCAGCACGTAATATTGGAGA      | miRNA | miR-16 |
| t0062170 | 21 | 1 TAGCAGCATGTAATATTTGC         | miRNA | miR-16 |
| t0062220 | 22 | 1 TAGAAGTACGTAATATTGGCG        | miRNA | miR-16 |
| t0062708 | 20 | 1 GAGCAGCACGTAATATTGG          | miRNA | miR-16 |
| t0062749 | 21 | 1 TAGCAGCACGTAAGTATTGGC        | miRNA | miR-16 |
| t0062850 | 24 | 1 TAGAAGCAAGTAAATATTGGCGAA     | miRNA | miR-16 |
| t0063151 | 23 | 1 TAGCAGCACGTAATACTGGCGT       | miRNA | miR-16 |
| t0063623 | 21 | 1 AGCAGCACGCAAATATTGGCG        | miRNA | miR-16 |
| t0063680 | 22 | 1 TAGCAGCACGTGAATATTGACG       | miRNA | miR-16 |
| t0063848 | 24 | 1 TAGCAGCACGTAATATTAGCGAA      | miRNA | miR-16 |
| t0063861 | 23 | 1 ATAGCAGCACGAAAATATTGGCG      | miRNA | miR-16 |
| t0064252 | 20 | 1 TAGCAGCAAGTAAATATGGG         | miRNA | miR-16 |
| t0064265 | 20 | 1 TAGCAGCACGTAATAATTAG         | miRNA | miR-16 |
| t0064315 | 22 | 1 TAGCAGCTCGAAAATATTGGCG       | miRNA | miR-16 |
| t0064336 | 20 | 1 TAGCAGCACGTAATATCCG          | miRNA | miR-16 |
| t0064470 | 24 | 1 TAGCAGCACGTAATATTGGGGTA      | miRNA | miR-16 |
| t0064526 | 22 | 1 TAGCCGCAAGTAAATATTGGCG       | miRNA | miR-16 |
| t0064707 | 22 | 1 TATCAGCACGTAGATATTGGCG       | miRNA | miR-16 |
| t0064773 | 25 | 1 TAGCAGCATGTAATATTGGCGAAA     | miRNA | miR-16 |

|          |    |                              |       |        |
|----------|----|------------------------------|-------|--------|
| t0064966 | 24 | 1 TAGAAGCACGTAAATATTGGCGAG   | miRNA | miR-16 |
| t0065166 | 22 | 1 TAGGAGAACGTAAATATTGGCG     | miRNA | miR-16 |
| t0065450 | 19 | 1 TAGCAGCACCTAAATATTG        | miRNA | miR-16 |
| t0065647 | 22 | 1 TAGCAGCAAGTAAACATTGGCG     | miRNA | miR-16 |
| t0065923 | 22 | 1 TAGCAGCACGTAAATATCCGCG     | miRNA | miR-16 |
| t0066174 | 23 | 1 CTAGCAGCACGTAAATATTGGGG    | miRNA | miR-16 |
| t0066363 | 23 | 1 TAGTAGCACGAAAATATTGGCGT    | miRNA | miR-16 |
| t0066542 | 19 | 1 TAGCAGCACGTAAAGTATTG       | miRNA | miR-16 |
| t0066553 | 23 | 1 TAGAAGAACGTAAATATTGGCGA    | miRNA | miR-16 |
| t0066701 | 23 | 1 TAGCAGTACGTAAATATTGGCGT    | miRNA | miR-16 |
| t0067008 | 22 | 1 TAGAAGCAGGTAAATATTGGCG     | miRNA | miR-16 |
| t0067228 | 21 | 1 TAGCAGCACGTAAATATGGGC      | miRNA | miR-16 |
| t0067301 | 23 | 1 TAGCCGCACGTAAATATTGGCGT    | miRNA | miR-16 |
| t0067309 | 21 | 1 TAGCAGAACGTAAATATTGGA      | miRNA | miR-16 |
| t0067846 | 23 | 1 TAGCAGCACGTAAATACTGGCGA    | miRNA | miR-16 |
| t0067868 | 24 | 1 TAGCAGCACGTAAAAATTGGCGAA   | miRNA | miR-16 |
| t0067869 | 22 | 1 TAGCAGCACGTAAAAATTGGGG     | miRNA | miR-16 |
| t0067895 | 20 | 1 TAGCAGCACGGAAAAATTGG       | miRNA | miR-16 |
| t0068336 | 21 | 1 TAGCAGCACGTTAATATTGGC      | miRNA | miR-16 |
| t0068420 | 22 | 1 TAGAAGCACGCAAATATTGGCG     | miRNA | miR-16 |
| t0068485 | 22 | 1 CAGCAGTACGTAAATATTGGCG     | miRNA | miR-16 |
| t0068603 | 23 | 1 TAGCAGCACGTAAATATGGGCGT    | miRNA | miR-16 |
| t0068733 | 22 | 1 TAGCAGCTCGGAAATATTGGCG     | miRNA | miR-16 |
| t0068778 | 22 | 1 TAGCAGTAAGTAAATATTGGCG     | miRNA | miR-16 |
| t0068943 | 20 | 1 TAGCGGCACGTAAATATTCCG      | miRNA | miR-16 |
| t0068995 | 21 | 1 AGCAGCACGTAAATATTGACG      | miRNA | miR-16 |
| t0069076 | 22 | 1 TAGCAGCAAGTAAATATTGGTG     | miRNA | miR-16 |
| t0069556 | 26 | 1 TAGCAGCCCGTAAATATTGGCGAAAA | miRNA | miR-16 |
| t0069570 | 21 | 1 TGGCAGCACGTAAATATTGGC      | miRNA | miR-16 |
| t0069846 | 22 | 1 TGGCAGCCCGTAAATATTGGCG     | miRNA | miR-16 |
| t0070069 | 25 | 1 TAGCAGCACGTAAATATTGACGACA  | miRNA | miR-16 |
| t0070147 | 21 | 1 CGCAGCACGTAAATATTGGCG      | miRNA | miR-16 |
| t0070204 | 22 | 1 TAGCAGCACGTGAATATTGTCTG    | miRNA | miR-16 |
| t0070273 | 25 | 1 TAGCAGCATGTAAATATTGGCGGAA  | miRNA | miR-16 |
| t0070361 | 22 | 1 TGGCGGCACGTAAATATTGGCG     | miRNA | miR-16 |
| t0070849 | 22 | 1 TAGCAGCACGTAGATATTGGAG     | miRNA | miR-16 |
| t0070903 | 24 | 1 TAGCAGCACGTAAATATCGGCGTT   | miRNA | miR-16 |
| t0071058 | 25 | 1 TAGCAGCACGCAAATATTGGCGAAA  | miRNA | miR-16 |
| t0071074 | 21 | 1 TAGCAGCACGGAAATATTGGC      | miRNA | miR-16 |
| t0071331 | 22 | 1 TAGCCGCGCGTAAATATTGGCG     | miRNA | miR-16 |
| t0071452 | 23 | 1 GAGCAGCACGTAAATATTGGCGA    | miRNA | miR-16 |
| t0071617 | 22 | 1 TAACAGCACGTAAATATTGCCG     | miRNA | miR-16 |
| t0071632 | 23 | 1 TAGCAGCACGTAAATATTGGGGA    | miRNA | miR-16 |
| t0072361 | 23 | 1 TAGCAGCACGTAAAGTATTGGCGA   | miRNA | miR-16 |
| t0072381 | 22 | 1 TAGCAGCAAGTAAAAATTGGCG     | miRNA | miR-16 |
| t0072506 | 25 | 1 TAGAAGCACGTAAATATTGGCGAAA  | miRNA | miR-16 |
| t0072527 | 22 | 1 AAGCACCACGTAAATATTGGCG     | miRNA | miR-16 |
| t0072784 | 22 | 1 TAGCAGCACGTAGATATTGGTG     | miRNA | miR-16 |
| t0073097 | 22 | 1 TAGCGGCACGTAAATATTGACG     | miRNA | miR-16 |
| t0073223 | 22 | 1 TAGCAGCACGTTAATATTGGTG     | miRNA | miR-16 |
| t0073499 | 23 | 1 TAGCAGGACGTAAATATTGGCGT    | miRNA | miR-16 |
| t0073633 | 22 | 1 TAGCAGCCCGTAAATCTTGGCG     | miRNA | miR-16 |
| t0073745 | 20 | 1 TGGCAGCACGGAAATATTGG       | miRNA | miR-16 |
| t0074014 | 22 | 1 TAGCATAACGTAAATATTGGCG     | miRNA | miR-16 |
| t0074186 | 22 | 1 TAGGAGCACGGAAATATTGGCG     | miRNA | miR-16 |
| t0074543 | 22 | 1 TAGCAGCCCGTAAAGTATTGGCG    | miRNA | miR-16 |
| t0074850 | 24 | 1 ATAGAAGCACGTAAATATTGGCGT   | miRNA | miR-16 |
| t0074957 | 21 | 1 CTAGCAGCACGTCAATATTGG      | miRNA | miR-16 |

|          |    |                              |       |        |
|----------|----|------------------------------|-------|--------|
| t0075019 | 25 | 1 GAGTAGCAGCACGTAAACATTGGCG  | miRNA | miR-16 |
| t0075072 | 21 | 1 AGCAGCACGAAAATATTGGCG      | miRNA | miR-16 |
| t0075177 | 24 | 1 TAGCAGCACGTAAATATTGGCGCA   | miRNA | miR-16 |
| t0075195 | 22 | 1 TAGCAGTGCGTAAATATTGGCG     | miRNA | miR-16 |
| t0075332 | 25 | 1 AAATAGAAGCACGTAAATATTGGCG  | miRNA | miR-16 |
| t0075550 | 23 | 1 TAGCAGCACGAAAATATTGGCGT    | miRNA | miR-16 |
| t0075724 | 22 | 1 TAGCAGCACGTAGATGTTGGCG     | miRNA | miR-16 |
| t0075984 | 26 | 1 TAGCGGCACGTAAATATTGGCGTTAT | miRNA | miR-16 |
| t0076000 | 21 | 1 AGCAGCACGTCAATATTGGCG      | miRNA | miR-16 |
| t0076150 | 23 | 1 ATAGCAGCACCTAAATATTGGCG    | miRNA | miR-16 |
| t0076212 | 22 | 1 TAGCAACACGTAAATATTGCCG     | miRNA | miR-16 |
| t0076315 | 25 | 1 ATAACAGCACGTAAATATTGGCGAA  | miRNA | miR-16 |
| t0077047 | 22 | 1 TAGCAGGACGGAAATATTGGCG     | miRNA | miR-16 |
| t0077284 | 25 | 1 GAGGAGCAGCACGTAAATATTGGCG  | miRNA | miR-16 |
| t0077314 | 20 | 1 TAGCAGCCCTTAAATATTGG       | miRNA | miR-16 |
| t0077419 | 20 | 1 ATAGCAGCACGTAAATATTG       | miRNA | miR-16 |
| t0077622 | 23 | 1 TAGCGGCACGTAAATATTGGCGT    | miRNA | miR-16 |
| t0077897 | 22 | 1 TAGCAGCAAGTAAATATGGGCG     | miRNA | miR-16 |
| t0077979 | 21 | 1 TAGCGGCACGTAAATATTGCC      | miRNA | miR-16 |
| t0078043 | 22 | 1 TAGCAGCACGTACAAATTGGCG     | miRNA | miR-16 |
| t0078128 | 22 | 1 TAGCAGCACGTAAATATTGTTG     | miRNA | miR-16 |
| t0078195 | 22 | 1 TAGCAGCACGTAAACATTGCCG     | miRNA | miR-16 |
| t0078315 | 21 | 1 TAGCAGAACGTAAATATTGGT      | miRNA | miR-16 |
| t0078486 | 21 | 1 TAGAAGCACGTAAATATTGGT      | miRNA | miR-16 |
| t0078506 | 22 | 1 TAGCAGCAAGTAAATCTTGGCG     | miRNA | miR-16 |
| t0078556 | 23 | 1 TAGCAGCACGTAAATCTTGGCGT    | miRNA | miR-16 |
| t0078619 | 23 | 1 ATAGCAGCACGTAAATACTGGCG    | miRNA | miR-16 |
| t0079175 | 23 | 1 TAGCAGCACGTAGATATTGGCGT    | miRNA | miR-16 |
| t0079690 | 23 | 1 TAGCAGCACGTAAATGTTGGCGA    | miRNA | miR-16 |
| t0079844 | 22 | 1 TAGCAGCACGTAAATATTGGAG     | miRNA | miR-16 |
| t0080146 | 19 | 1 TAGTAGCACGTAAATATTG        | miRNA | miR-16 |
| t0080155 | 23 | 1 TAGCAGCACGTAAATATTGGGGC    | miRNA | miR-16 |
| t0080252 | 20 | 1 TAGCAGCACGTAAATAGTCG       | miRNA | miR-16 |
| t0080257 | 22 | 1 TAGAAGCACGTCAATATTGGCG     | miRNA | miR-16 |
| t0080515 | 24 | 1 TAGCAGCATGTAAATATTGGCGAT   | miRNA | miR-16 |
| t0080602 | 20 | 1 TAGCAGCGCGTAAATATTCCG      | miRNA | miR-16 |
| t0080729 | 22 | 1 TAGCAGTACGTAAATAATGGCG     | miRNA | miR-16 |
| t0080826 | 22 | 1 TAGCAACAAGTAAATATTGGCG     | miRNA | miR-16 |
| t0080879 | 22 | 1 TGGCAGCACGTAAATATTGGTG     | miRNA | miR-16 |
| t0080895 | 22 | 1 TAGCAGCACGTAGATATTGCCG     | miRNA | miR-16 |
| t0081229 | 22 | 1 TAGCAGTTCGTAAATATTGGCG     | miRNA | miR-16 |
| t0081388 | 22 | 1 TAGCAGTACGTAAATATTGGTG     | miRNA | miR-16 |
| t0081409 | 22 | 1 TAGCAGCCCTTAAATATTGGCG     | miRNA | miR-16 |
| t0081490 | 21 | 1 TAGCAGCACGTGAATATTGGC      | miRNA | miR-16 |
| t0081789 | 22 | 1 TAGCAGCACGTAAATATTCTCG     | miRNA | miR-16 |
| t0081948 | 22 | 1 TAGCAGCCCGTAACTATTGGCG     | miRNA | miR-16 |
| t0082037 | 21 | 1 GGCAGCACGTAAATATTGGCG      | miRNA | miR-16 |
| t0082172 | 22 | 1 TAGCAGCACGCACATATTGGCG     | miRNA | miR-16 |
| t0082242 | 23 | 1 TAGCAGCCCGTAAATATTGGCGT    | miRNA | miR-16 |
| t0082243 | 21 | 1 AGCAGCACGTAAATATTGGCG      | miRNA | miR-16 |
| t0082515 | 23 | 1 TAGCAGCACGTAAATATTGGCGA    | miRNA | miR-16 |
| t0082656 | 22 | 1 TAGCAGAACGTAAATATTCCG      | miRNA | miR-16 |
| t0082745 | 22 | 1 TATCAGCACGTAAATAGTGGCG     | miRNA | miR-16 |
| t0083382 | 25 | 1 TGGCAGCACGTAAATATTGGCGAAA  | miRNA | miR-16 |
| t0083384 | 24 | 1 TAGGAGCACGGAAATATTGGCGTA   | miRNA | miR-16 |
| t0083491 | 22 | 1 TAGCAGCACGTAAATTTTGGTG     | miRNA | miR-16 |
| t0083983 | 23 | 1 TAGCAGCACGTAGATATTGGCGA    | miRNA | miR-16 |
| t0084292 | 23 | 1 TAGCAGCACGTAAATATTGGCGT    | miRNA | miR-16 |

|          |    |                             |       |         |
|----------|----|-----------------------------|-------|---------|
| t0084418 | 22 | 1 TAGCGGCACGTAAGTATTGGCG    | miRNA | miR-16  |
| t0084594 | 22 | 1 TAGCAGCACGAAAATATCGGCG    | miRNA | miR-16  |
| t0084698 | 22 | 1 TAGCAGCACGCAAATATTGGTG    | miRNA | miR-16  |
| t0084732 | 22 | 1 TAGCAGCTTGTAATATTGGCG     | miRNA | miR-16  |
| t0085060 | 22 | 1 TAGCAGTACGTAATATTGACG     | miRNA | miR-16  |
| t0085127 | 23 | 1 TAGCAGCACGTATATATTGGCGT   | miRNA | miR-16  |
| t0085225 | 22 | 1 TAGCAGCACGTAAATCTTGGTG    | miRNA | miR-16  |
| t0085255 | 22 | 1 TAGCAGCTCGTAAATATTTGCG    | miRNA | miR-16  |
| t0085471 | 22 | 1 TAGCAGCAAGTAAATGTTGGCG    | miRNA | miR-16  |
| t0085487 | 22 | 1 TAGCAGCCCGTAAATATTGGGG    | miRNA | miR-16  |
| t0085645 | 23 | 1 TAACAGCACGTAATATTGGCGT    | miRNA | miR-16  |
| t0085770 | 21 | 1 CAGCAGCACGTAATATTGGC      | miRNA | miR-16  |
| t0086028 | 23 | 1 CTAGCAGCCCGTAAATATTGGCG   | miRNA | miR-16  |
| t0086291 | 21 | 1 TAGCAGCACGTAATATTAGA      | miRNA | miR-16  |
| t0086614 | 19 | 1 TAGCAGCACGTAACATTG        | miRNA | miR-16  |
| t0086718 | 22 | 1 TAGCAGCACTTAAATATTGCGG    | miRNA | miR-16  |
| t0086887 | 21 | 1 AGCCGCACGTAATATTGGCG      | miRNA | miR-16  |
| t0087047 | 22 | 1 TAGCAGCCCGTAAATATTGGAG    | miRNA | miR-16  |
| t0087127 | 22 | 1 TATCAGTACGTAATATTGGCG     | miRNA | miR-16  |
| t0087237 | 21 | 1 CAGCAGCACGTAATATTGGT      | miRNA | miR-16  |
| t0087573 | 20 | 1 TAGGAGCACGTAATATTGA       | miRNA | miR-16  |
| t0087890 | 22 | 1 CAGCAGCACGTAAGTATTGGCG    | miRNA | miR-16  |
| t0087955 | 23 | 1 TAGCAGCACGTAATATTGCGGT    | miRNA | miR-16  |
| t0088023 | 22 | 1 TAGCAGTACGCAAATATTGGCG    | miRNA | miR-16  |
| t0088187 | 23 | 1 TAGCAGCACGTAATATTGACGT    | miRNA | miR-16  |
| t0088993 | 26 | 1 CAAGTAGCAGCACGTAATATTGGAG | miRNA | miR-16  |
| t0089302 | 23 | 1 TAGCAGCACGTAATTATTGGCGT   | miRNA | miR-16  |
| t0089435 | 22 | 1 TAGCCGCACGTACATATTGGCG    | miRNA | miR-16  |
| t0089629 | 22 | 1 TAGCAGCCCGTAAATATTTGCG    | miRNA | miR-16  |
| t0089669 | 22 | 1 TAGCAGCACGTCAATATTGGTG    | miRNA | miR-16  |
| t0089809 | 23 | 1 TAGCAGCACGTCAATATTGGCGA   | miRNA | miR-16  |
| t0089853 | 22 | 1 TAGAAGCACGTGAATATTGGCG    | miRNA | miR-16  |
| t0089864 | 22 | 1 TAGCAGCGCGTAAATATTGGAG    | miRNA | miR-16  |
| t0090045 | 22 | 1 GTAGCAGCACGTAATATTGGC     | miRNA | miR-16  |
| t0090288 | 22 | 1 TAGCAGAACGTAATCTTGGCG     | miRNA | miR-16  |
| t0090499 | 22 | 1 TAGCAGCCTGTAATATTGGCG     | miRNA | miR-16  |
| t0090531 | 20 | 1 TACCAGCACGTATATATTGG      | miRNA | miR-16  |
| t0090757 | 24 | 1 TAGCAGTACGTAATATTGGCGTT   | miRNA | miR-16  |
| t0090801 | 22 | 1 TAGCAGAACGTA AAAATTGGCG   | miRNA | miR-16  |
| t0090851 | 23 | 1 ATAGCAGCGCGTAAATATTGGCG   | miRNA | miR-16  |
| t0090858 | 22 | 1 TAGCAGCAAGTGAATATTGGCG    | miRNA | miR-16  |
| t0090962 | 22 | 1 AGCAGCACGTAATATTGGCGC     | miRNA | miR-16  |
| t0091007 | 24 | 1 GTAGCAGCCCGTAAATATTGGCGT  | miRNA | miR-16  |
| t0091192 | 23 | 1 ATAGCAGAACGTAATATTGGCG    | miRNA | miR-16  |
| t0091204 | 22 | 1 TAGCATCACGTAATATTGTCG     | miRNA | miR-16  |
| t0091429 | 22 | 1 TGGCAGCACGTAATATTGCGG     | miRNA | miR-16  |
| t0091510 | 19 | 1 TAGCAGCACGTCAATATTG       | miRNA | miR-16  |
| t0091829 | 19 | 1 TACCAGCACGTAATATTG        | miRNA | miR-16  |
| t0091997 | 22 | 1 TAGCAGCACGTAAGGATTGGCG    | miRNA | miR-16  |
| t0092113 | 23 | 1 ATAGCAGCACGTCAATATTGGCG   | miRNA | miR-16  |
| t0092145 | 21 | 1 TAGCCGCCCATCATGGTTTTA     | miRNA | miR-15c |
| t0092279 | 22 | 1 TAGCAGCAAATCATGGTTTTCA    | miRNA | miR-15c |
| t0092370 | 22 | 1 TAGCGGCACATCATGGTTTTCA    | miRNA | miR-15c |
| t0092413 | 22 | 1 TAGCAGCACATCATGGGTTTTCA   | miRNA | miR-15c |
| t0092474 | 20 | 1 TAGAAGCACATCATGGTTTT      | miRNA | miR-15c |
| t0092478 | 20 | 1 TAGCAGAAGATCATGGTTTT      | miRNA | miR-15c |
| t0092657 | 22 | 1 TAGCAGCACATCATGGTTATCC    | miRNA | miR-15c |
| t0092766 | 22 | 1 TAGCAGAACATCATGGTTTTCA    | miRNA | miR-15c |

|          |    |                                 |       |          |
|----------|----|---------------------------------|-------|----------|
| t0092779 | 20 | 1 TAGCGGCACATCATGGTTTT          | miRNA | miR-15c  |
| t0093002 | 20 | 1 TAGACGCACATCATGGTTTT          | miRNA | miR-15c  |
| t0093303 | 22 | 1 TAGAAGCACATCATGGTTTTCA        | miRNA | miR-15c  |
| t0093340 | 20 | 1 TAGCCGCAAATCATGGTTTT          | miRNA | miR-15c  |
| t0093342 | 22 | 1 TAGCAGCACATTATGGTTTTAA        | miRNA | miR-15c  |
| t0044815 | 20 | 1 TAGCAGCCATCATGGTTTT           | miRNA | miR-15c  |
| t0044843 | 21 | 1 TAGCAGCAAATCATGGTTTTA         | miRNA | miR-15c  |
| t0048084 | 20 | 1 TAGCAGCGCATCATGGTTTT          | miRNA | miR-15c  |
| t0049433 | 20 | 1 TAGTAGCACATCATGGTTTT          | miRNA | miR-15c  |
| t0049715 | 22 | 1 TAGCAGAACATCATGGTTATCA        | miRNA | miR-15c  |
| t0049801 | 22 | 1 CGAATCATTATTTGCTGCTCTC        | miRNA | miR-15b* |
| t0055033 | 19 | 1 CGAATCATTATTTGCTGAT           | miRNA | miR-15b* |
| t0059405 | 18 | 1 AGCGGCACATCATGGTTT            | miRNA | miR-15b  |
| t0062410 | 19 | 1 CAGCCGCACATCATGGTTT           | miRNA | miR-15b  |
| t0068209 | 22 | 1 AATAGAAGCACATCATGGTTTA        | miRNA | miR-15b  |
| t0068759 | 19 | 1 TACCAGCACATTATGGTTT           | miRNA | miR-15b  |
| t0071289 | 21 | 1 ACTAGCAGCGCATCATGGTTT         | miRNA | miR-15b  |
| t0074756 | 18 | 1 TAGCAGCACATCATGCTC            | miRNA | miR-15b  |
| t0077447 | 20 | 1 TAGTAGCATATCATGGTTTA          | miRNA | miR-15b  |
| t0077963 | 19 | 1 TAGCAGACCATCATGGTTT           | miRNA | miR-15b  |
| t0080958 | 22 | 1 TAGCAGTACATCATGGTTTACC        | miRNA | miR-15b  |
| t0082457 | 21 | 1 TAGCAGCGCATCATGGTTTAA         | miRNA | miR-15b  |
| t0088149 | 19 | 1 TAGTAGCACATCATGCTTT           | miRNA | miR-15b  |
| t0074593 | 19 | 1 TAGCAGCACATCAGGGTTT           | miRNA | miR-15b  |
| t0085436 | 22 | 1 TAGCGGCACATCTTGGTTTACA        | miRNA | miR-15b  |
| t0040969 | 19 | 1 TAGCAGCACGTTATGGTTT           | miRNA | miR-15b  |
| t0041376 | 19 | 1 TAGCAGCCGATCATGGTTT           | miRNA | miR-15b  |
| t0041514 | 20 | 1 TAGCAGCACCTCATGGGTTA          | miRNA | miR-15b  |
| t0041889 | 22 | 1 TAGCAGCACATCATGGGTTACC        | miRNA | miR-15b  |
| t0042002 | 21 | 1 AGCAGCACATCATGGTTTACA         | miRNA | miR-15b  |
| t0042379 | 19 | 1 TAGCGGCACATCATGATTT           | miRNA | miR-15b  |
| t0043833 | 24 | 1 TAGCAGCACATCATGGGTTAAGTT      | miRNA | miR-15b  |
| t0043924 | 21 | 1 TAGCAGCACATAATGGTTTAC         | miRNA | miR-15b  |
| t0044015 | 22 | 1 TAGAAGCACAACATGGTTTACA        | miRNA | miR-15b  |
| t0045173 | 18 | 1 TAGCAGCAAATCATGTTT            | miRNA | miR-15b  |
| t0045209 | 20 | 1 TAGCAGCACATTATGGATTA          | miRNA | miR-15b  |
| t0045692 | 20 | 1 TAGCAGCACATCATGGGGTA          | miRNA | miR-15b  |
| t0045780 | 25 | 1 TAGCAGCACATAATGGTTTACAATA     | miRNA | miR-15b  |
| t0045822 | 20 | 1 GCAGCACATCATGGTTTACG          | miRNA | miR-15b  |
| t0046011 | 19 | 1 TAGTAGCACATCATGGGTT           | miRNA | miR-15b  |
| t0046943 | 18 | 1 TAGCAGCACATCATGGCT            | miRNA | miR-15b  |
| t0047013 | 20 | 1 TAGCAGCACATAATGATTTA          | miRNA | miR-15b  |
| t0047114 | 18 | 1 TACCAGCACATCATGGTT            | miRNA | miR-15b  |
| t0047160 | 22 | 1 TAGCCGCACATCATGGTTTACC        | miRNA | miR-15b  |
| t0047554 | 19 | 1 TAGAAGCACATCATGGGTT           | miRNA | miR-15b  |
| t0047736 | 30 | 1 TAGCAGCACATCATGGTTTACCAATCATG | miRNA | miR-15b  |
| t0048802 | 19 | 1 TAGCAGCCATCATGGTTA            | miRNA | miR-15b  |
| t0049529 | 24 | 1 AAAATAGAAGCACATCATGGTTTA      | miRNA | miR-15b  |
| t0049964 | 20 | 1 TAGAAGCACATGATGGTTTA          | miRNA | miR-15b  |
| t0050144 | 22 | 1 TAGCAGCACATTATGTTTTACA        | miRNA | miR-15b  |
| t0050176 | 19 | 1 AAGCAGCACATCATGGTTC           | miRNA | miR-15b  |
| t0050850 | 19 | 1 TAGCAGCACAGCATGGGTT           | miRNA | miR-15b  |
| t0050885 | 18 | 1 TAGCAGCACATCATGGTC            | miRNA | miR-15b  |
| t0050953 | 24 | 1 TAGCAGCATATCATGGTTTAAGTT      | miRNA | miR-15b  |
| t0051044 | 19 | 1 TATCAGCACATCATGGATT           | miRNA | miR-15b  |
| t0051330 | 23 | 1 TAGCAGCACATCATGGATTACAA       | miRNA | miR-15b  |
| t0051345 | 21 | 1 TAGCAGCACATCATGGTTACG         | miRNA | miR-15b  |
| t0051525 | 19 | 1 TAGAAGCCATCATGGTTT            | miRNA | miR-15b  |

|          |    |                                 |       |         |
|----------|----|---------------------------------|-------|---------|
| t0051637 | 20 | 1 TAGCAGCAGATCATGGGTTA          | miRNA | miR-15b |
| t0051677 | 21 | 1 TACCAGCACATCATGGTTTAC         | miRNA | miR-15b |
| t0051899 | 21 | 1 TAGCAGCACATCATGTTTTAC         | miRNA | miR-15b |
| t0051959 | 22 | 1 TAGCAGCACATCATGCTTTACC        | miRNA | miR-15b |
| t0052049 | 19 | 1 TAGCAGGATATCATGGTTT           | miRNA | miR-15b |
| t0052191 | 20 | 1 AAGCAGCACATCATGGGTTA          | miRNA | miR-15b |
| t0052605 | 20 | 1 TACCAGCACATCGTGGTTTA          | miRNA | miR-15b |
| t0052686 | 22 | 1 TAGCAACACATCATGTTTTACA        | miRNA | miR-15b |
| t0053972 | 22 | 1 TAGCAGCACATCATGGTTTGTG        | miRNA | miR-15b |
| t0054119 | 21 | 1 TAGCAGAACATCATGGTTTAA         | miRNA | miR-15b |
| t0054487 | 24 | 1 TAGCAGAACATCATGGTTTACAAA      | miRNA | miR-15b |
| t0054499 | 18 | 1 TAGCAGCTCATCATGGTT            | miRNA | miR-15b |
| t0054527 | 30 | 1 TAGCAGCACATCATGGTTTACAAATCATG | miRNA | miR-15b |
| t0054947 | 21 | 1 AATAGCAGCACATCATGGGTT         | miRNA | miR-15b |
| t0054948 | 22 | 1 TAGCAGCACATCATGGTTTAAAC       | miRNA | miR-15b |
| t0055113 | 22 | 1 TGGCAGAACATCATGGTTTACA        | miRNA | miR-15b |
| t0055457 | 20 | 1 TAGCAGTACATCATGGGTTA          | miRNA | miR-15b |
| t0055659 | 22 | 1 TAGCAGAAAATCATGGTTTACA        | miRNA | miR-15b |
| t0055706 | 18 | 1 TTGCAGCACATCATGGTT            | miRNA | miR-15b |
| t0055850 | 21 | 1 TAGCAGCACATCATGGCTTAC         | miRNA | miR-15b |
| t0057223 | 19 | 1 TAGTAGCACATCATGGTTA           | miRNA | miR-15b |
| t0058279 | 22 | 1 TAGCAGCACATCATGGTTAACA        | miRNA | miR-15b |
| t0058289 | 26 | 1 TTGGTAGCAGCACATCATGGTTTACA    | miRNA | miR-15b |
| t0059026 | 19 | 1 TAGCAGCAGATCATGGATT           | miRNA | miR-15b |
| t0059386 | 28 | 1 TAGCAGCATATCATGGTTTACATGCCAC  | miRNA | miR-15b |
| t0059419 | 22 | 1 TAGCAGAACATCATGGTTTACC        | miRNA | miR-15b |
| t0059501 | 20 | 1 CAGCAGCACATTATGGTTTA          | miRNA | miR-15b |
| t0060487 | 19 | 1 TAGCAGCACATCATGGTGT           | miRNA | miR-15b |
| t0060625 | 22 | 1 TAGCAGCATATCATGGTTTACC        | miRNA | miR-15b |
| t0060628 | 20 | 1 TAGAAGCACATCATGGATTA          | miRNA | miR-15b |
| t0061149 | 22 | 1 TAGTAGCACATCATGGTTTATA        | miRNA | miR-15b |
| t0061261 | 20 | 1 TAGCAGCACATCATGCTTTA          | miRNA | miR-15b |
| t0062075 | 20 | 1 GAGAAGCACATCATGGTTTA          | miRNA | miR-15b |
| t0062180 | 21 | 1 TAGCAGCACATCATGGCTTAA         | miRNA | miR-15b |
| t0062352 | 22 | 1 TAGGAGCACATCATGGTTTATA        | miRNA | miR-15b |
| t0062528 | 19 | 1 TAGCAACACATTATGGTTT           | miRNA | miR-15b |
| t0063719 | 21 | 1 TCGCAGCACATCATGGTTTAA         | miRNA | miR-15b |
| t0064071 | 19 | 1 TAGAAGCAGATCATGGTTT           | miRNA | miR-15b |
| t0064499 | 21 | 1 TAGCAGCACATCATGGGTTAA         | miRNA | miR-15b |
| t0064788 | 20 | 1 TAGCAGAATATCATGGTTTA          | miRNA | miR-15b |
| t0065265 | 21 | 1 TAGCAGCACATCATGGTTGAA         | miRNA | miR-15b |
| t0065786 | 20 | 1 TAGCAGCACATAATGGATTA          | miRNA | miR-15b |
| t0066334 | 21 | 1 TAGCAACACATCATGGTTTAC         | miRNA | miR-15b |
| t0066640 | 18 | 1 AGCAGGACATCATGGTTT            | miRNA | miR-15b |
| t0066937 | 20 | 1 TAGCAGCACTTCATGGGTTA          | miRNA | miR-15b |
| t0067261 | 22 | 1 TAGCAGAACATCATGGTTTAAA        | miRNA | miR-15b |
| t0067675 | 19 | 1 TAGCAGCGCATCATGGGTT           | miRNA | miR-15b |
| t0067996 | 20 | 1 TAGCGGCATATCATGGTTTA          | miRNA | miR-15b |
| t0068088 | 19 | 1 TAGCATCACATCATGGTTA           | miRNA | miR-15b |
| t0069286 | 18 | 1 AGCAGTACATCATGGTTT            | miRNA | miR-15b |
| t0069318 | 22 | 1 TAGCAGCACATCATGGGTCACA        | miRNA | miR-15b |
| t0069732 | 21 | 1 TAGCAGTACATCATGGTTTAC         | miRNA | miR-15b |
| t0069883 | 30 | 1 TAGCAGCAAATCATGGTTTACAAATTATG | miRNA | miR-15b |
| t0070570 | 19 | 1 TAGCGGCACATTATGGTTT           | miRNA | miR-15b |
| t0070943 | 19 | 1 TAGGAGCACATCATGGTTA           | miRNA | miR-15b |
| t0070997 | 22 | 1 TAGCAGCGCATTATGGTTTACA        | miRNA | miR-15b |
| t0071398 | 20 | 1 TAGCAGCATATAATGGTTTA          | miRNA | miR-15b |
| t0071760 | 21 | 1 TAGCGGCACATCATGGTTTAC         | miRNA | miR-15b |

|          |    |                           |       |         |
|----------|----|---------------------------|-------|---------|
| t0072150 | 19 | 1 TAGCACCACATCATGGTTA     | miRNA | miR-15b |
| t0072986 | 20 | 1 TAGCGGCACATCATGGGTTA    | miRNA | miR-15b |
| t0073245 | 22 | 1 TAGCAGTACGTCATGGTTTACA  | miRNA | miR-15b |
| t0074026 | 20 | 1 TAGCAGACCATCATGGTTTA    | miRNA | miR-15b |
| t0074050 | 22 | 1 TAGCAGCACATCATTGTTTACC  | miRNA | miR-15b |
| t0074426 | 19 | 1 TAGCAGCACATCGTGGTTA     | miRNA | miR-15b |
| t0074619 | 20 | 1 TAGAAACACATCATGGTTTA    | miRNA | miR-15b |
| t0074676 | 18 | 1 AGCATCACATCATGGTTT      | miRNA | miR-15b |
| t0075176 | 18 | 1 TAGCAGCACTTCATGGTT      | miRNA | miR-15b |
| t0075564 | 22 | 1 TAGCAGCACATAATGGTTTATT  | miRNA | miR-15b |
| t0075877 | 22 | 1 TAGCAGTACATCCTGGTTTACA  | miRNA | miR-15b |
| t0075925 | 20 | 1 TAGCAGAAAATCATGGTTTA    | miRNA | miR-15b |
| t0076470 | 23 | 1 TAGCAGCACATCATGGTTTAAAT | miRNA | miR-15b |
| t0076942 | 21 | 1 TAGCAGCGCATCATGGTTTAC   | miRNA | miR-15b |
| t0077233 | 20 | 1 TAGCGGCACTTCATGGTTTA    | miRNA | miR-15b |
| t0077243 | 22 | 1 TAGCAGCACATCAGGGTTTACA  | miRNA | miR-15b |
| t0077291 | 19 | 1 TAGAATCACATCATGGTTT     | miRNA | miR-15b |
| t0077687 | 22 | 1 TACCAGCACATCATGGTTTACA  | miRNA | miR-15b |
| t0077841 | 19 | 1 AAGCAGCACATTATGGTTT     | miRNA | miR-15b |
| t0078145 | 20 | 1 TAGCAGCATATCATGGGTTA    | miRNA | miR-15b |
| t0078290 | 18 | 1 TAGTAGCACATCATGGTT      | miRNA | miR-15b |
| t0078296 | 18 | 1 TAGAAGCACATTATGGTT      | miRNA | miR-15b |
| t0078945 | 19 | 1 TAGCAGCACATGATGCTTT     | miRNA | miR-15b |
| t0079137 | 20 | 1 TAGCAGCACATCAAGGGTTA    | miRNA | miR-15b |
| t0079837 | 20 | 1 TAGCAGCATATCATGGATTA    | miRNA | miR-15b |
| t0080031 | 19 | 1 TGGCAGCACATCATGGTTA     | miRNA | miR-15b |
| t0080355 | 20 | 1 TAGCAGCACATAATGGGTTA    | miRNA | miR-15b |
| t0080664 | 20 | 1 TAGCAGCACATCAGGGTTTA    | miRNA | miR-15b |
| t0081515 | 20 | 1 TTGCAGCACATCATGGTTTA    | miRNA | miR-15b |
| t0081618 | 19 | 1 TAGCAAAACATCATGGTTT     | miRNA | miR-15b |
| t0081642 | 19 | 1 TAGCGGCCCATCATGGTTT     | miRNA | miR-15b |
| t0081740 | 22 | 1 TAGCAGCCCATCATGTTTACA   | miRNA | miR-15b |
| t0082491 | 19 | 1 TAGAAGCATATCATGGTTT     | miRNA | miR-15b |
| t0082795 | 22 | 1 TAGCAGCACATTATGGTTTACC  | miRNA | miR-15b |
| t0082963 | 19 | 1 TAGCAGCGCATTATGGTTT     | miRNA | miR-15b |
| t0083161 | 20 | 1 TAGCAGCACATCAATGTTTA    | miRNA | miR-15b |
| t0083505 | 22 | 1 TAGTAGCATCACATCATGGTTT  | miRNA | miR-15b |
| t0085493 | 19 | 1 TAGCCGGACATCATGGTTT     | miRNA | miR-15b |
| t0085553 | 22 | 1 TAGAAGCACATCATGGTTTAAA  | miRNA | miR-15b |
| t0085647 | 22 | 1 TAGCAGCAAATAATGGTTTACA  | miRNA | miR-15b |
| t0086226 | 19 | 1 TAGCAGCACGTCATGGTTA     | miRNA | miR-15b |
| t0086241 | 22 | 1 TAGCAGCATATCATGGGTTACA  | miRNA | miR-15b |
| t0086657 | 22 | 1 TAGCTGCACATCATGGTTTACA  | miRNA | miR-15b |
| t0086717 | 22 | 1 TAGAAGCACATCATGGGTTACA  | miRNA | miR-15b |
| t0087033 | 18 | 1 TAGCAACACATCATGGTT      | miRNA | miR-15b |
| t0087103 | 21 | 1 TAGTAGCACATCATGGTTTAC   | miRNA | miR-15b |
| t0087456 | 19 | 1 TAGCAGTAAATCATGGTTT     | miRNA | miR-15b |
| t0087490 | 20 | 1 TAGCCGCATATCATGGTTTA    | miRNA | miR-15b |
| t0087685 | 19 | 1 TAGCAGAACATCATGGATT     | miRNA | miR-15b |
| t0087773 | 20 | 1 AAGCAGCATATCATGGTTTA    | miRNA | miR-15b |
| t0087960 | 22 | 1 TAGCAGCACATGATGGTTTACA  | miRNA | miR-15b |
| t0088111 | 21 | 1 TAGCAGCACATCCTGGTTTGT   | miRNA | miR-15b |
| t0088225 | 20 | 1 TAGCAGCACATCGTGGGTTA    | miRNA | miR-15b |
| t0088568 | 22 | 1 TAGCAGAACATCATGTTTACA   | miRNA | miR-15b |
| t0088986 | 21 | 1 AATAGCAGCACCTCATGGTTT   | miRNA | miR-15b |
| t0090082 | 21 | 1 TAGCAGCACATAATGGCTTTT   | miRNA | miR-15a |
| t0090131 | 19 | 1 TTGCAGCACATAATGGGTT     | miRNA | miR-15a |
| t0090291 | 21 | 1 GAGCAGCACATAATGGTTTGT   | miRNA | miR-15a |

|          |    |                                 |       |         |
|----------|----|---------------------------------|-------|---------|
| t0090309 | 21 | 1 TAGCAGCACCTAATGGCTTGT         | miRNA | miR-15a |
| t0091453 | 18 | 1 TAGCAGCACATACTGGTT            | miRNA | miR-15a |
| t0092186 | 23 | 1 TAGCAGCACACAATGGTTTGTGG       | miRNA | miR-15a |
| t0092228 | 20 | 1 TAGCAGCACATAATGGGTTT          | miRNA | miR-15a |
| t0092476 | 20 | 1 TAGCAGCACACAATGATTTG          | miRNA | miR-15a |
| t0092592 | 19 | 1 TAGCAGCACATAACGGTTT           | miRNA | miR-15a |
| t0092709 | 20 | 1 TAGCAGCACATAATGGTGTG          | miRNA | miR-15a |
| t0092788 | 20 | 1 TAGTAGAACATAATGGTTTTG         | miRNA | miR-15a |
| t0093451 | 19 | 1 TGGCAGCACATAATGGTTT           | miRNA | miR-15a |
| t0093521 | 20 | 1 TAGTAGTACATAATGGTTTTG         | miRNA | miR-15a |
| t0041030 | 20 | 1 TAGAAGCACATAATGGGTTG          | miRNA | miR-15a |
| t0041574 | 22 | 1 TAGCAGTACATAATGGTTTACA        | miRNA | miR-15a |
| t0042421 | 22 | 1 TAGCAGCACATAATGGTTAGTG        | miRNA | miR-15a |
| t0042767 | 20 | 1 TAACAGCACATAATGGGTTG          | miRNA | miR-15a |
| t0042780 | 18 | 1 TAGCAGCACATATTGGTT            | miRNA | miR-15a |
| t0043081 | 19 | 1 TCGCAGCACATAATGGTTT           | miRNA | miR-15a |
| t0043105 | 23 | 1 ATAGCAGCACATAATGGTTTGGG       | miRNA | miR-15a |
| t0043756 | 22 | 1 TAGCAGCACATGATGGTTTGTG        | miRNA | miR-15a |
| t0043928 | 20 | 1 TAGAAGCACATACTGGTTTG          | miRNA | miR-15a |
| t0044592 | 19 | 1 TAGCAGCACATACTGGGTT           | miRNA | miR-15a |
| t0045117 | 24 | 1 TAGCAGCACATAATGGTTTTTTGGA     | miRNA | miR-15a |
| t0045246 | 20 | 1 TAGCAGCACATAACGTTTTTG         | miRNA | miR-15a |
| t0046074 | 19 | 1 TAGGAGCACATAATGGTTT           | miRNA | miR-15a |
| t0046192 | 23 | 1 TAGCAGCACATAATGGTTTGTCA       | miRNA | miR-15a |
| t0046438 | 20 | 1 TAGAAGCAAATAATGGTTTG          | miRNA | miR-15a |
| t0046561 | 19 | 1 TAGCAGCACATAGTGGTTT           | miRNA | miR-15a |
| t0047016 | 19 | 1 TAGCAGAACATAATGGTTA           | miRNA | miR-15a |
| t0047153 | 19 | 1 TAGCAGCACATAAAGGTTT           | miRNA | miR-15a |
| t0047708 | 22 | 1 TAGCAGAACATAATGGTTTGTT        | miRNA | miR-15a |
| t0047767 | 18 | 1 TAGCGGCACATAATGGTT            | miRNA | miR-15a |
| t0047949 | 19 | 1 TAGCAGCACATAATGGTAC           | miRNA | miR-15a |
| t0048285 | 23 | 1 TAGCAGCACGTAATGGTTTGTGG       | miRNA | miR-15a |
| t0048963 | 19 | 1 TAGCAGCACATACTGGTTT           | miRNA | miR-15a |
| t0049622 | 22 | 1 TAGCAGCATATAATGGTTTGTG        | miRNA | miR-15a |
| t0049705 | 19 | 1 TACCAGCACATAATGGTTT           | miRNA | miR-15a |
| t0050862 | 20 | 1 TAGAAGCACACAATGGTTTG          | miRNA | miR-15a |
| t0051355 | 22 | 1 TGGCAGCACATAATGGTTTGTG        | miRNA | miR-15a |
| t0051851 | 42 | 1 TAGCAGCACATAATGGTTTGTCTGATGAG | miRNA | miR-15a |
| t0053447 | 22 | 1 TAGCAGCACATAATGGTTTGTCA       | miRNA | miR-15a |
| t0054127 | 22 | 1 TAGTAGCAGCACATAATGGTTT        | miRNA | miR-15a |
| t0054136 | 22 | 1 TAGCAGCCCATAATGGTTTGTG        | miRNA | miR-15a |
| t0056758 | 22 | 1 TAGCAGCACATAATGGCTTGTG        | miRNA | miR-15a |
| t0056888 | 20 | 1 TAGCAGCACATAAATGTTTG          | miRNA | miR-15a |
| t0057135 | 22 | 1 TAGCAGCATATAATGGTTTGTGTA      | miRNA | miR-15a |
| t0057493 | 22 | 1 TAGCAGCACATGATGGTTTGTT        | miRNA | miR-15a |
| t0057577 | 22 | 1 TAGCAGCTCATAATGGTTTGTG        | miRNA | miR-15a |
| t0059021 | 21 | 1 AGCAGCACATAATGGTTTGGG         | miRNA | miR-15a |
| t0059688 | 23 | 1 TAGCAGCACATAATGGTTTGGGA       | miRNA | miR-15a |
| t0060017 | 22 | 1 CAGCAGCACATAATGGTTTGTGTA      | miRNA | miR-15a |
| t0060282 | 22 | 1 TAGAAGCACATAATGGTTTTTG        | miRNA | miR-15a |
| t0060391 | 22 | 1 TAGTAGCACATAATGGTTTGTG        | miRNA | miR-15a |
| t0060840 | 22 | 1 ATAGCAGCACGTAATGGTTTGT        | miRNA | miR-15a |
| t0062339 | 24 | 1 TAGCAGCACATAATGGGTTGTGGA      | miRNA | miR-15a |
| t0062722 | 22 | 1 TAGCAGCACATAATGGTTGGTG        | miRNA | miR-15a |
| t0063503 | 18 | 1 TAGCAGCACATAATGGTC            | miRNA | miR-15a |
| t0064716 | 19 | 1 TATCAGCACATAATGGTTT           | miRNA | miR-15a |
| t0065033 | 21 | 1 TAGCAGAACATAATGGTTTAC         | miRNA | miR-15a |
| t0065215 | 21 | 1 TAGCAGCACATAATGGGATGT         | miRNA | miR-15a |



|          |    |                              |       |          |
|----------|----|------------------------------|-------|----------|
| t0065271 | 24 | 1 TAGCAGGACATAATGGTTTGTGAA   | miRNA | miR-15a  |
| t0065317 | 19 | 1 TAGCAGCTCATAATGGTTG        | miRNA | miR-15a  |
| t0065322 | 22 | 1 TAGCAGCACATACTGGTTTGTG     | miRNA | miR-15a  |
| t0065740 | 18 | 1 TAGCAGCACGTAATGGTG         | miRNA | miR-15a  |
| t0065880 | 21 | 1 TAGCAGCACATAATGGGGTGT      | miRNA | miR-15a  |
| t0066713 | 18 | 1 TAGCAGCACATAATGCTG         | miRNA | miR-15a  |
| t0066744 | 23 | 1 TAGCAGCACATAATGGTTTGGGG    | miRNA | miR-15a  |
| t0066961 | 20 | 1 CAGCAGCACATAATGGGTTG       | miRNA | miR-15a  |
| t0067248 | 19 | 1 TAGCAGCACATAATAGTTT        | miRNA | miR-15a  |
| t0067329 | 22 | 1 CAGCAGCACATAATGGTTTGTG     | miRNA | miR-15a  |
| t0067651 | 21 | 1 TAGCAGCACATAATGGTATGT      | miRNA | miR-15a  |
| t0067677 | 19 | 1 TAGCGGCACATAATGGTTG        | miRNA | miR-15a  |
| t0067777 | 22 | 1 TAGCAGCACATAATGGTTGGGG     | miRNA | miR-15a  |
| t0068203 | 20 | 1 TAGCAGCACATAAGGGTTTG       | miRNA | miR-15a  |
| t0068301 | 20 | 1 TAGCGGCGCATAATGGTTTG       | miRNA | miR-15a  |
| t0068507 | 22 | 1 ATAGCAGAACATAATGGTTTGT     | miRNA | miR-15a  |
| t0068993 | 22 | 1 TAGCAGCACATAATGGGTTGTT     | miRNA | miR-15a  |
| t0069378 | 26 | 1 GAGTTAGCAGCACATAATGGTTTTTG | miRNA | miR-15a  |
| t0070564 | 21 | 1 TTGCAGCACATAATGGTTTGT      | miRNA | miR-15a  |
| t0070676 | 23 | 1 ATAGCAGAACATAATGGTTTGTG    | miRNA | miR-15a  |
| t0071348 | 20 | 1 TAGAAGCATATAATGGTTTG       | miRNA | miR-15a  |
| t0072019 | 23 | 1 TAGCAGCACATAATGGGTTGTGG    | miRNA | miR-15a  |
| t0072513 | 22 | 1 TAGCATCACATAATGGTTTGTG     | miRNA | miR-15a  |
| t0072692 | 19 | 1 TAGTAGCACATAATGGTTG        | miRNA | miR-15a  |
| t0072795 | 21 | 1 TAGCTGCACATAATGGTTTGT      | miRNA | miR-15a  |
| t0072952 | 22 | 1 TAGCCGCACATAATGGTTTGTG     | miRNA | miR-15a  |
| t0072954 | 20 | 1 TAGCAGAACATAATGGTTTT       | miRNA | miR-15a  |
| t0073073 | 20 | 1 TAGCAGAATATAATGGTTTG       | miRNA | miR-15a  |
| t0073178 | 20 | 1 TTGCAGCACATAATGGTTTG       | miRNA | miR-15a  |
| t0073476 | 19 | 1 TAGAAGCACATAATGGTTG        | miRNA | miR-15a  |
| t0073910 | 22 | 1 TAGCACCACATAATGGTTTGTG     | miRNA | miR-15a  |
| t0073953 | 18 | 1 TAGCAGCACATAATGGGG         | miRNA | miR-15a  |
| t0075936 | 19 | 1 TAGCAGCACATAATGGTTC        | miRNA | miR-15a  |
| t0076225 | 18 | 1 TAGCAGGACATAATGGTT         | miRNA | miR-15a  |
| t0076674 | 20 | 1 TAGAAGAACATAATGGTTTG       | miRNA | miR-15a  |
| t0078100 | 20 | 1 TAGCAGAACCTAATGGTTTG       | miRNA | miR-15a  |
| t0078206 | 21 | 1 TAGCAGAACATAATGGATTGT      | miRNA | miR-15a  |
| t0078300 | 21 | 1 TAGCAGCACATAATTGTTTGT      | miRNA | miR-15a  |
| t0078410 | 18 | 1 AGCAGCACATAATGGTTT         | miRNA | miR-15a  |
| t0080094 | 24 | 1 TAGCAGCACGTAATGGTTTGTGGA   | miRNA | miR-15a  |
| t0080828 | 20 | 1 TGGCAGAACATAATGGTTTG       | miRNA | miR-15a  |
| t0080910 | 20 | 1 TAGCAGAAAATAATGGTTTG       | miRNA | miR-15a  |
| t0081200 | 22 | 1 TAGCAGCACACAATGATTTGTG     | miRNA | miR-15a  |
| t0082343 | 20 | 1 TAGCCGCACATAATGGGTTG       | miRNA | miR-15a  |
| t0082950 | 20 | 1 TAGCATCACATAATGGGTTG       | miRNA | miR-15a  |
| t0083570 | 20 | 1 TAGCATCACATAACGGTTTG       | miRNA | miR-15a  |
| t0083652 | 19 | 1 TAGCAGCCATAATGGTTT         | miRNA | miR-15a  |
| t0083929 | 19 | 1 TAGCAGCGCATAATGGTTG        | miRNA | miR-15a  |
| t0084547 | 20 | 1 TCGCAGCACATAATGGGTTG       | miRNA | miR-15a  |
| t0084952 | 19 | 1 TAACAGCACATAATGGTTT        | miRNA | miR-15a  |
| t0086195 | 21 | 1 TAGCAGCACATATTGGTTTGT      | miRNA | miR-15a  |
| t0086696 | 20 | 1 TAGCAGCACATAATGGTTGG       | miRNA | miR-15a  |
| t0086922 | 20 | 1 TAGCAGCACCTAATGGGTTG       | miRNA | miR-15a  |
| t0087696 | 20 | 1 AAGCAGAACATAATGGTTTG       | miRNA | miR-15a  |
| t0088543 | 22 | 1 TAGCAGGACATAATGGTTTGTG     | miRNA | miR-15a  |
| t0089031 | 20 | 1 TAGCCGCATATAATGGTTTG       | miRNA | miR-15a  |
| t0089698 | 19 | 1 TAGCAGCGCATAATGGTTT        | miRNA | miR-15a  |
| t0089800 | 23 | 1 AATCTCCTTCGAATGCCACTTTT    | miRNA | miR-1596 |

|          |    |                             |       |            |
|----------|----|-----------------------------|-------|------------|
| t0090016 | 20 | 1 AACACCTCCTTCGAATGCCA      | miRNA | miR-1596   |
| t0090110 | 20 | 1 ACCCGTCGGCTGTCAGCGGA      | miRNA | miR-1557   |
| t0090917 | 18 | 1 CCCGTCGGCTGTCAGCGG        | miRNA | miR-1557   |
| t0091015 | 25 | 1 ACCCGTCGGCTGTCAGCGGACTGCT | miRNA | miR-1557   |
| t0091319 | 21 | 1 TCAGGGCATGACAGAACTTGG     | miRNA | miR-152    |
| t0091547 | 24 | 1 TCAGTGCATGACATAACTTGGATC  | miRNA | miR-152    |
| t0091616 | 24 | 1 TCAGTGCATGACAGAACTTGGATA  | miRNA | miR-152    |
| t0091739 | 22 | 1 TCAGTGCATGACAGAACTTGGG    | miRNA | miR-152    |
| t0091786 | 22 | 1 TCAGTACATGACAGAACTTGGT    | miRNA | miR-152    |
| t0092241 | 22 | 1 TCAGGGCATGACAGAACTTGGT    | miRNA | miR-152    |
| t0092534 | 22 | 1 TTAGTGCATGACAGAACTTGGT    | miRNA | miR-152    |
| t0092621 | 22 | 1 TCAGTGCATGACAGGACTTGGT    | miRNA | miR-152    |
| t0046316 | 22 | 1 TTGAGGAGCTCACAGTCTAGTA    | miRNA | miR-151-5p |
| t0089248 | 21 | 1 TCGAGGAGCTCACAGTCAAGT     | miRNA | miR-151-5p |
| t0051589 | 20 | 1 TCGAGGAGCTCACAGTCCAG      | miRNA | miR-151-5p |
| t0085431 | 21 | 1 TCGAGGAGCACACAGTCTAGT     | miRNA | miR-151-5p |
| t0089204 | 21 | 1 TCGAGGAGCTCACAGCCTAGT     | miRNA | miR-151-5p |
| t0042637 | 21 | 1 TCGGGGAGCTCACAGTCTAGT     | miRNA | miR-151-5p |
| t0042690 | 22 | 1 TCGAGGAGCTCACAGTCTAGTC    | miRNA | miR-151-5p |
| t0043848 | 22 | 1 CTAGACTGAAGCTCCTTGCGGA    | miRNA | miR-151-3p |
| t0053909 | 25 | 1 CTAGACCGAAGCTCCTTGAGGAAGA | miRNA | miR-151-3p |
| t0057944 | 24 | 1 CTAGACTGAAGCTCCTTGCGGAAG  | miRNA | miR-151-3p |
| t0074494 | 24 | 1 CTTGACTGAAGCTCCTTGAGGAAG  | miRNA | miR-151-3p |
| t0075459 | 25 | 1 CTAGACTGAAGCTCCCTGAGGAAGA | miRNA | miR-151-3p |
| t0080081 | 20 | 1 CTAGACTGAAGATCCTTGAG      | miRNA | miR-151-3p |
| t0052692 | 25 | 1 CTAGACTGAAGCTCCTTGAGTAAGA | miRNA | miR-151-3p |
| t0058688 | 20 | 1 CTAGACTAAAGCTCCTTGAG      | miRNA | miR-151-3p |
| t0059095 | 20 | 1 CTAGACTGAGGCTTCTTGAG      | miRNA | miR-151-3p |
| t0071687 | 20 | 1 CCAGACTGAAGCTCCTTGAG      | miRNA | miR-151-3p |
| t0072743 | 25 | 1 CTAGACTGAGGCTCCTTGAGAAATC | miRNA | miR-151-3p |
| t0074358 | 23 | 1 CTAGACTGAAGCTCCTTGAGGGA   | miRNA | miR-151-3p |
| t0075659 | 22 | 1 GGAAGATCTTGTAGCATGGTTT    | miRNA | miR-1503   |
| t0048675 | 21 | 1 GAAGATCTTGTAGCATGGTAT     | miRNA | miR-1503   |
| t0049909 | 21 | 1 CCAGGAAGATCTTGAAGCATA     | miRNA | miR-1503   |
| t0055081 | 24 | 1 CTGGTACAGGCCTGGGGGACAATC  | miRNA | miR-150*   |
| t0057699 | 22 | 1 TCTCCAACCCTTGACCAGTG      | miRNA | miR-150    |
| t0057873 | 21 | 1 TCTCGCAACCCTTGACCAGT      | miRNA | miR-150    |
| t0060900 | 22 | 1 TCTCCAACCCTTGACCAGTG      | miRNA | miR-150    |
| t0065925 | 22 | 1 CCTCCAACCCTTGACCAGTG      | miRNA | miR-150    |
| t0075747 | 22 | 1 TCTCCAACTCTTGACCAGTA      | miRNA | miR-150    |
| t0079617 | 22 | 1 TCTCCAATCCTTGACCAGTG      | miRNA | miR-150    |
| t0084598 | 22 | 1 TTTCCAACCCTTGACCAGTG      | miRNA | miR-150    |
| t0090799 | 21 | 1 TCTCACAACCCTTGACCAGT      | miRNA | miR-150    |
| t0092797 | 22 | 1 TCTCCAACCCTCGTACCAGTA     | miRNA | miR-150    |
| t0082270 | 23 | 1 TCTGCCAACCCTTGACCAGTGT    | miRNA | miR-150    |
| t0083040 | 22 | 1 TCTCCAACCCTTGACCAGAG      | miRNA | miR-150    |
| t0083446 | 23 | 1 TCTCCAACCCTTGAACCAGTGT    | miRNA | miR-150    |
| t0042740 | 21 | 1 TCTCCAACCCTTGACCAGC       | miRNA | miR-150    |
| t0042530 | 22 | 1 TCTCACAACCCTTGACCAGTG     | miRNA | miR-150    |
| t0042679 | 21 | 1 TCTCCAACCCTTGACCGGT       | miRNA | miR-150    |
| t0044160 | 22 | 1 TCTCCAACCATTGTACCAGTG     | miRNA | miR-150    |
| t0047233 | 21 | 1 TCTCCAACCCTTGACCAGA       | miRNA | miR-150    |
| t0050264 | 23 | 1 TCTCCAACCCTTGACCAGAGT     | miRNA | miR-150    |
| t0052297 | 21 | 1 TCTCCAACCCTGTACAAGT       | miRNA | miR-150    |
| t0055449 | 23 | 1 TCTCCAACCCTTGACCAGTGA     | miRNA | miR-150    |
| t0057428 | 21 | 1 TCTCCAACCCTTGACCAGT       | miRNA | miR-150    |
| t0059499 | 20 | 1 TCTCCAACCCTTGATCAG        | miRNA | miR-150    |
| t0060404 | 21 | 1 TCTCCAACCCTTATACCAGT      | miRNA | miR-150    |

|          |    |                               |       |             |
|----------|----|-------------------------------|-------|-------------|
| t0061174 | 22 | 1 TCTCCCAAACCTTGTACCAGTG      | miRNA | miR-150     |
| t0062081 | 21 | 1 TCTTCCAACCCTTGTACCAGT       | miRNA | miR-150     |
| t0062952 | 21 | 1 TCTCCCAAACCTTGGACCAGT       | miRNA | miR-150     |
| t0064848 | 21 | 1 TATCCCAAACCTTGTACCAGT       | miRNA | miR-150     |
| t0066869 | 18 | 1 TATTGCTGTACCGGCCTG          | miRNA | miR-1492    |
| t0066974 | 20 | 1 TATTGCTGTACCGGCCTGTA        | miRNA | miR-1492    |
| t0068649 | 18 | 1 TATTGCACTACCGGCCTG          | miRNA | miR-1492    |
| t0070982 | 21 | 1 TCAGTGCATCACCGAACTTTG       | miRNA | miR-148b-3p |
| t0072983 | 21 | 1 TCAGTGCATCACAGAACTTTG       | miRNA | miR-148b-3p |
| t0073060 | 21 | 1 TCAGTGTATCACAGAACTTTG       | miRNA | miR-148b-3p |
| t0076727 | 21 | 1 TAAGTGCATCACAGAACTTTG       | miRNA | miR-148b-3p |
| t0078469 | 27 | 1 TCAGTGCATCACAGAACTTTGTATATC | miRNA | miR-148b-3p |
| t0080717 | 19 | 1 TCAGTGCCTTACAGAACTT         | miRNA | miR-148b-3p |
| t0081652 | 21 | 1 TCAGTGCATCACAGAACTTTA       | miRNA | miR-148b-3p |
| t0086443 | 18 | 1 TCAGAGCATCACAGAACT          | miRNA | miR-148b-3p |
| t0090465 | 21 | 1 TCAGTGAATCACAGAACTTTG       | miRNA | miR-148b-3p |
| t0092738 | 21 | 1 TCAGCGCATCACAGAACTTTG       | miRNA | miR-148b-3p |
| t0057949 | 18 | 1 TCAGTGCATCACATAACT          | miRNA | miR-148b-3p |
| t0084820 | 20 | 1 TCAGGGCATCACAGAACTTT        | miRNA | miR-148b-3p |
| t0092972 | 19 | 1 CAGTGCCTACAGAAGTTT          | miRNA | miR-148a    |
| t0051277 | 25 | 1 TCAGTGCCTACAGAATTTGGTAG     | miRNA | miR-148a    |
| t0057490 | 25 | 1 TCAGTGCCTACAGAACTTTGGATC    | miRNA | miR-148a    |
| t0061599 | 23 | 1 TCAGTGCCTACAGAACTTTGGA      | miRNA | miR-148a    |
| t0062213 | 23 | 1 TCAGTGCCTCCAGAACTTTGAA      | miRNA | miR-148a    |
| t0062322 | 21 | 1 TCAGTGCCTACAGAACCTTG        | miRNA | miR-148a    |
| t0070544 | 22 | 1 TCAGGGCACTACAGAACTTTGT      | miRNA | miR-148a    |
| t0071493 | 18 | 1 TCAGTGCCTCCAGAACT           | miRNA | miR-148a    |
| t0071715 | 18 | 1 TCAGTCCACTACAGAACT          | miRNA | miR-148a    |
| t0075600 | 25 | 1 TCAGTGCCTACGGAACCTTTGTATC   | miRNA | miR-148a    |
| t0083596 | 22 | 1 TCAATGCACTACAGAACTTTGA      | miRNA | miR-148a    |
| t0083714 | 25 | 1 TCGGTGCACTACAGAACTTTGTATC   | miRNA | miR-148a    |
| t0090806 | 21 | 1 TAAGTGCCTACAGAACTTTG        | miRNA | miR-148a    |
| t0040957 | 21 | 1 CCACTGCACTACAGAACTTTG       | miRNA | miR-148a    |
| t0041037 | 22 | 1 TCAGTGTACTACAGAACTTTGA      | miRNA | miR-148a    |
| t0042083 | 25 | 1 TCAGTGCCTACAGAACTTTGCGTG    | miRNA | miR-148a    |
| t0044149 | 21 | 1 TTAGTGCCTACAGAACTTTG        | miRNA | miR-148a    |
| t0044355 | 21 | 1 TCAGTACTACTACAGAACTTTG      | miRNA | miR-148a    |
| t0044810 | 20 | 1 TCAGTGCCTACAGAGCTTT         | miRNA | miR-148a    |
| t0045548 | 21 | 1 TCAGTGCCTACAGAACTTTT        | miRNA | miR-148a    |
| t0049813 | 22 | 1 CCACTGCACTACAGAACTTTGA      | miRNA | miR-148a    |
| t0052440 | 25 | 1 TCAGTGCCTACAGGACTTTGTATC    | miRNA | miR-148a    |
| t0052856 | 19 | 1 TCAGTACTACTACAGAACTT        | miRNA | miR-148a    |
| t0053638 | 20 | 1 TCAGTGAACTACAGAACTTT        | miRNA | miR-148a    |
| t0062816 | 23 | 1 TCAGAGCACTACAGAACTTTGAA     | miRNA | miR-148a    |
| t0064938 | 20 | 1 TCAGTACATTACAGAACTTT        | miRNA | miR-148     |
| t0065638 | 23 | 1 TGAGAACTGAATTCCATAGACTG     | miRNA | miR-146c    |
| t0066169 | 24 | 1 TGAGAACTGAATTCCATAGGCATC    | miRNA | miR-146b-5p |
| t0066760 | 26 | 1 TGAGAACTGAATTCCATGGTTTATC   | miRNA | miR-146b-5p |
| t0067485 | 25 | 1 TGAGAACTGAATTCCATAGGCTGGA   | miRNA | miR-146b    |
| t0067603 | 22 | 1 CGAGAACTGAATTCCATAGGCT      | miRNA | miR-146b    |
| t0073150 | 27 | 1 TGAGAACTGAATTCCATAGGTTGTATC | miRNA | miR-146b    |
| t0074734 | 26 | 1 TGAGAACTGAATTCCATAGGCTGATC  | miRNA | miR-146b    |
| t0077022 | 23 | 1 TGAGAACTGAATTCCATCGGCTG     | miRNA | miR-146b    |
| t0079918 | 27 | 1 TGAGAACTGAATTCCATCGGCTGTATC | miRNA | miR-146b    |
| t0081438 | 27 | 1 TGAGAACTGAGTTCCATAGGCTGTATC | miRNA | miR-146b    |
| t0090208 | 23 | 1 GGATATCATCATACACTGTAAGT     | miRNA | miR-144*    |
| t0092481 | 22 | 1 GGATATCATCATATCCTGTAAG      | miRNA | miR-144*    |
| t0057240 | 23 | 1 GGATATCATCATATACTATAAGT     | miRNA | miR-144*    |

|          |    |                            |       |          |
|----------|----|----------------------------|-------|----------|
| t0075104 | 20 | 1 AGATATCATCATATACTGTA     | miRNA | miR-144* |
| t0062960 | 21 | 1 GGATATCATCATAAAAGTGTAA   | miRNA | miR-144* |
| t0065966 | 23 | 1 GGATATCATCATATGCTGTAAGT  | miRNA | miR-144* |
| t0053593 | 20 | 1 GGATATCATCATATATTGTA     | miRNA | miR-144* |
| t0054355 | 23 | 1 GGGTATCATCATATACTGTAAGT  | miRNA | miR-144* |
| t0059859 | 24 | 1 GGATATAATCATATACTGTAAGTT | miRNA | miR-144* |
| t0066343 | 21 | 1 GGATACCATCATATACTGTAA    | miRNA | miR-144* |
| t0080894 | 21 | 1 GGATATCATCATACACTGTAA    | miRNA | miR-144* |
| t0083573 | 21 | 1 GGATATCATCATATACTGTAG    | miRNA | miR-144* |
| t0090501 | 21 | 1 TGATATCATCATATACTGTAA    | miRNA | miR-144* |
| t0040991 | 23 | 1 GGATATCAATATATACTGTAAGT  | miRNA | miR-144* |
| t0042206 | 23 | 1 GGATACCATCATATACTGTAAGT  | miRNA | miR-144* |
| t0042572 | 22 | 1 GGATACCATCATATACTGTAAG   | miRNA | miR-144* |
| t0043388 | 20 | 1 GGATATCATCATATACTATA     | miRNA | miR-144* |
| t0044559 | 23 | 1 GGATATCATTATATACTGTCAGT  | miRNA | miR-144* |
| t0045437 | 23 | 1 GGATATCAACATATACTGTAAGT  | miRNA | miR-144* |
| t0045850 | 23 | 1 GGATAACATCATATACTGTAAGT  | miRNA | miR-144* |
| t0049099 | 23 | 1 GGATATCATGATATACTGTAAGT  | miRNA | miR-144* |
| t0049834 | 21 | 1 GAATATCATCATATACTGTAA    | miRNA | miR-144* |
| t0051002 | 23 | 1 GGATATCATCATATACTGTATGT  | miRNA | miR-144* |
| t0051298 | 20 | 1 GGATATCATCATATACTGAA     | miRNA | miR-144* |
| t0052207 | 24 | 1 GGATATCATCATACACTGTAAGTT | miRNA | miR-144* |
| t0052510 | 21 | 1 GGATATCATCATATACCGTAA    | miRNA | miR-144* |
| t0053041 | 22 | 1 GGATATCATCATATACTGTAGG   | miRNA | miR-144* |
| t0053348 | 23 | 1 GGATATCATTATATACTGTACGT  | miRNA | miR-144* |
| t0053888 | 24 | 1 GATATCATCATATACTGTAAGTTT | miRNA | miR-144* |
| t0053921 | 18 | 1 GGATATCATCATAAAAGTGT     | miRNA | miR-144* |
| t0055162 | 23 | 1 GGATATCATCATATACTGGAAGT  | miRNA | miR-144* |
| t0057487 | 20 | 1 GGATCTCATCATATACTGTA     | miRNA | miR-144* |
| t0058503 | 24 | 1 GGATATCATCATATACTGCAAGTT | miRNA | miR-144* |
| t0059139 | 22 | 1 CGATATCATCATATACTGTAAG   | miRNA | miR-144* |
| t0059728 | 23 | 1 GGATATCATCATATACTGAAAGT  | miRNA | miR-144* |
| t0060060 | 22 | 1 GGATATCATCGTATACTGTAAG   | miRNA | miR-144* |
| t0060264 | 22 | 1 GGATATCATCATATACTGCAAG   | miRNA | miR-144* |
| t0061056 | 22 | 1 GTATATCATCATATACTGTAAG   | miRNA | miR-144* |
| t0062971 | 22 | 1 GCATATCATCATATACTGTAAG   | miRNA | miR-144* |
| t0063043 | 23 | 1 GGATATCATCATCTACTGTAAGT  | miRNA | miR-144* |
| t0064042 | 22 | 1 GGTTATCATCATATACTGTAAG   | miRNA | miR-144* |
| t0064990 | 21 | 1 GGATATCATCATATAATGTAA    | miRNA | miR-144* |
| t0065517 | 23 | 1 GGATATCATCATGTACTGTAAGT  | miRNA | miR-144* |
| t0068327 | 21 | 1 GGATAACATCATATACTGTAA    | miRNA | miR-144* |
| t0069984 | 23 | 1 GGATATCATCATATAATGTAAGT  | miRNA | miR-144* |
| t0071258 | 23 | 1 GGATATCATCATATACTGTAAGT  | miRNA | miR-144* |
| t0073329 | 22 | 1 TACAGTATAGATGATGTATTAT   | miRNA | miR-144  |
| t0075477 | 21 | 1 TATAGTATAGATGATGTACTA    | miRNA | miR-144  |
| t0082624 | 20 | 1 AATACAGTATAGATGAAGTA     | miRNA | miR-144  |
| t0084988 | 21 | 1 ATACAGTTTAGATGATGTACT    | miRNA | miR-144  |
| t0085804 | 19 | 1 ATACAGTATAGATGATGCA      | miRNA | miR-144  |
| t0086337 | 19 | 1 TACAGGATAGATGATGTAA      | miRNA | miR-144  |
| t0086750 | 22 | 1 TACAGTATAGATGATGTAATAT   | miRNA | miR-144  |
| t0087473 | 18 | 1 CTACAGTATAGATGGTGT       | miRNA | miR-144  |
| t0090689 | 21 | 1 TACAGTATAGATGATGTACCA    | miRNA | miR-144  |
| t0092385 | 21 | 1 TACAGTATAGATGATGGAATT    | miRNA | miR-144  |
| t0092496 | 20 | 1 TACAGTATAGATGATGTCAA     | miRNA | miR-144  |
| t0093497 | 19 | 1 CTATAGTATAGATGATGTA      | miRNA | miR-144  |
| t0093543 | 18 | 1 TTCAGTATAGATGATGTA       | miRNA | miR-144  |
| t0041620 | 22 | 1 TACGGTATAGATGATGTACTAA   | miRNA | miR-144  |
| t0042372 | 19 | 1 CTACAGTATATATGATGTA      | miRNA | miR-144  |

|          |    |                           |       |         |
|----------|----|---------------------------|-------|---------|
| t0042684 | 18 | 1 TACAGCATAGATGATGTA      | miRNA | miR-144 |
| t0042893 | 21 | 1 ACAGTATAGATGTTGTACTTT   | miRNA | miR-144 |
| t0043011 | 19 | 1 TACAGTATAGATGAGGTAA     | miRNA | miR-144 |
| t0043856 | 23 | 1 TACAGTATAGATGATGTCCATAA | miRNA | miR-144 |
| t0046876 | 21 | 1 GACAGTATAGATGATGTACTT   | miRNA | miR-144 |
| t0047272 | 19 | 1 CTACAGTATAGATGATATA     | miRNA | miR-144 |
| t0047369 | 19 | 1 CTACAGTGTAGATGATGTA     | miRNA | miR-144 |
| t0047843 | 20 | 1 CTACAGTATAGATGATGCAT    | miRNA | miR-144 |
| t0048224 | 18 | 1 TACAGTATAGATGGTGTA      | miRNA | miR-144 |
| t0048708 | 18 | 1 CTACAGTATGGATGATGT      | miRNA | miR-144 |
| t0048875 | 21 | 1 TACAGTGTAGATGATGTACTT   | miRNA | miR-144 |
| t0050166 | 18 | 1 TGCAGTATAGATGATGTA      | miRNA | miR-144 |
| t0050924 | 19 | 1 CTACCGTATAGATGATGTA     | miRNA | miR-144 |
| t0051250 | 20 | 1 TACAGTGTAGATGATGGACT    | miRNA | miR-144 |
| t0051665 | 21 | 1 TACAGTATAGATGATGTAAAC   | miRNA | miR-144 |
| t0052055 | 19 | 1 GTACAGTATAGATGATGTA     | miRNA | miR-144 |
| t0052717 | 19 | 1 CTACAGTATAGATGTTGTA     | miRNA | miR-144 |
| t0053675 | 19 | 1 CTACAGTATAGATGATTTA     | miRNA | miR-144 |
| t0054345 | 22 | 1 TACAGTATAGATAATGTACTAT  | miRNA | miR-144 |
| t0054399 | 18 | 1 TACAGTATAAATGATGTA      | miRNA | miR-144 |
| t0055147 | 19 | 1 TACAGTATAGATGATGAAC     | miRNA | miR-144 |
| t0056246 | 23 | 1 TACAGTAAAGATGATGTACATAA | miRNA | miR-144 |
| t0056821 | 20 | 1 TACAGTATGGATGATGTACT    | miRNA | miR-144 |
| t0056974 | 18 | 1 TAAAGTATAGATGATGTA      | miRNA | miR-144 |
| t0057497 | 18 | 1 TACAGGATAGATGATGTA      | miRNA | miR-144 |
| t0057682 | 20 | 1 TGCAGTATAGATGATGTACT    | miRNA | miR-144 |
| t0058476 | 20 | 1 CACAGTATAGATGATGTATT    | miRNA | miR-144 |
| t0058829 | 19 | 1 CTACAGGATAGATGATGTA     | miRNA | miR-144 |
| t0059722 | 18 | 1 TACAGTATACATGATGTA      | miRNA | miR-144 |
| t0060267 | 20 | 1 TACAGTATAGTTGATGTACT    | miRNA | miR-144 |
| t0060351 | 18 | 1 TACAGTATAGAAGATGTA      | miRNA | miR-144 |
| t0061012 | 22 | 1 TACAGTATAGACGATGTACTAT  | miRNA | miR-144 |
| t0061705 | 23 | 1 TACAGTATAGATGATGTAAATAA | miRNA | miR-144 |
| t0061743 | 20 | 1 TACAGTATAGATGACGTACT    | miRNA | miR-144 |
| t0061979 | 22 | 1 TACAGTATAGATGATGTCCTAA  | miRNA | miR-144 |
| t0062715 | 19 | 1 CTACAGTTTATAGATGATGTA   | miRNA | miR-144 |
| t0063158 | 22 | 1 TACAGTATAGATGGTGTACTAT  | miRNA | miR-144 |
| t0064530 | 19 | 1 CTACAGCATAGATGATGTA     | miRNA | miR-144 |
| t0064831 | 20 | 1 ATACAGTATAGCTGATGTAA    | miRNA | miR-144 |
| t0065087 | 21 | 1 ATACGGTATAGATGATGTACT   | miRNA | miR-144 |
| t0065294 | 20 | 1 TACAGTATATATGATGTACT    | miRNA | miR-144 |
| t0066052 | 22 | 1 TACAGTATAGATGATGTACCAT  | miRNA | miR-144 |
| t0066203 | 19 | 1 TACAGCATAGATGATGTAG     | miRNA | miR-144 |
| t0066778 | 19 | 1 TCCAGTATAGATGATGTAA     | miRNA | miR-144 |
| t0068382 | 22 | 1 TACAGTATAGATGATGCACTTT  | miRNA | miR-144 |
| t0070399 | 21 | 1 TACAGTATAGATAATGTACTT   | miRNA | miR-144 |
| t0070681 | 20 | 1 TACAGTATAGATGATATTCT    | miRNA | miR-144 |
| t0070876 | 20 | 1 TACAGTGTAGATGATGTAAT    | miRNA | miR-144 |
| t0070985 | 21 | 1 TACAGTATAGATGATGGACTT   | miRNA | miR-144 |
| t0071444 | 20 | 1 TACAGTATAGATGATATACT    | miRNA | miR-144 |
| t0073790 | 19 | 1 TACAGTATAGATGTTGTAC     | miRNA | miR-144 |
| t0074055 | 18 | 1 TACACTATAGATGATGTA      | miRNA | miR-144 |
| t0074349 | 22 | 1 AATTACAGTATAGATGATGTAA  | miRNA | miR-144 |
| t0074703 | 20 | 1 TACAGTATAAATGATGTACT    | miRNA | miR-144 |
| t0075821 | 19 | 1 TACAGTATAGATGATGTCC     | miRNA | miR-144 |
| t0075977 | 21 | 1 TACAGTGTAGATGATGTACTA   | miRNA | miR-144 |
| t0078267 | 19 | 1 CTACGGTATAGATGATGTA     | miRNA | miR-144 |
| t0078520 | 22 | 1 TACAGTACAGATGATGTACTTT  | miRNA | miR-144 |

|          |    |                              |       |            |
|----------|----|------------------------------|-------|------------|
| t0080494 | 19 | 1 TAGAGTATAGATGATGTAC        | miRNA | miR-144    |
| t0081679 | 18 | 1 TACAGTATATATGATGTA         | miRNA | miR-144    |
| t0083278 | 25 | 1 TACAGTATAGATGACGTAATAAAAA  | miRNA | miR-144    |
| t0084278 | 19 | 1 CTACAGTATAGAAGATGTA        | miRNA | miR-144    |
| t0084308 | 21 | 1 TACAGTATGGATGATGTACTT      | miRNA | miR-144    |
| t0084956 | 19 | 1 CTACAGTATAGAGGATGTA        | miRNA | miR-144    |
| t0085437 | 21 | 1 TACAGTAGAGATGATGTTTTT      | miRNA | miR-144    |
| t0085549 | 20 | 1 TACAGTATAGATAATGTACT       | miRNA | miR-144    |
| t0086256 | 23 | 1 TGAGGTGAAGCACTGTAGCTATC    | miRNA | miR-143    |
| t0087991 | 25 | 1 TGAGATGAAGCACTGTAGCTCTAAC  | miRNA | miR-143    |
| t0089307 | 23 | 1 TGAGATAAAGCACTGTAGCTATC    | miRNA | miR-143    |
| t0089439 | 25 | 1 TGAGATGAAGCACTGTAGCTATATC  | miRNA | miR-143    |
| t0089721 | 23 | 1 TGAGATGAAGCAGTGTAGCTATC    | miRNA | miR-143    |
| t0089859 | 23 | 1 CGAGATGAAGCACTGTACCTATC    | miRNA | miR-143    |
| t0090447 | 23 | 1 TGAGATTAAGCACTGCAGCTATC    | miRNA | miR-143    |
| t0090815 | 23 | 1 TGAGATGAAGCATTGTAGCTCTC    | miRNA | miR-143    |
| t0090938 | 23 | 1 GGAGATGAAGCACTGTAGCTATC    | miRNA | miR-143    |
| t0091422 | 23 | 1 TGAGATGAAGCACTGTAGCTGTC    | miRNA | miR-143    |
| t0091838 | 23 | 1 TGAGATGATGCACTGTAGCTATC    | miRNA | miR-143    |
| t0093063 | 23 | 1 TGAGATGAAGCACTGTAGCTACC    | miRNA | miR-143    |
| t0093240 | 23 | 1 TGAGATGAAGCACTGTAGCACTC    | miRNA | miR-143    |
| t0041719 | 23 | 1 TGAGATGAAGGACTGTAGCTATC    | miRNA | miR-143    |
| t0043146 | 23 | 1 TGAAATGAAGCACTGTAGCTATC    | miRNA | miR-143    |
| t0049148 | 23 | 1 TGAGATGAAGCACTGTAGCGATC    | miRNA | miR-143    |
| t0049420 | 23 | 1 TGAGATGAAGCACTGTAGCTAAC    | miRNA | miR-143    |
| t0054946 | 23 | 1 TGAGATGAAGCACTGTAGGTATC    | miRNA | miR-143    |
| t0055818 | 23 | 1 TGAGACGAAGCACTGTAGCTATC    | miRNA | miR-143    |
| t0058388 | 23 | 1 TGAGATGAAGCACTGTGGCTATC    | miRNA | miR-143    |
| t0059796 | 26 | 1 TGAGATGAAGCACTGTAGCTCTAATA | miRNA | miR-143    |
| t0060451 | 23 | 1 TGAGATGAAGCGCTGTAGCTATC    | miRNA | miR-143    |
| t0061494 | 23 | 1 TCAGATGAAGCACTGTAGCTATC    | miRNA | miR-143    |
| t0061739 | 23 | 1 TGAGATTAAGCACTGTAGCTGTC    | miRNA | miR-143    |
| t0064186 | 23 | 1 TGAGATGAAGCACTGTAGCCATC    | miRNA | miR-143    |
| t0065550 | 23 | 1 TGAGATGAAGTACTGTAGCTATC    | miRNA | miR-143    |
| t0067016 | 23 | 1 TGAGATGAATCACTGTAGCTATC    | miRNA | miR-143    |
| t0067528 | 19 | 1 CATAAAGTAGAAATCACTA        | miRNA | miR-142-5p |
| t0072483 | 20 | 1 CATAAAGTAGAAAGCGCTAC       | miRNA | miR-142-5p |
| t0074790 | 21 | 1 CATAAAGTAGTAAGCACTACT      | miRNA | miR-142-5p |
| t0076184 | 22 | 1 ATAAAGTAGAAAGCACTACTAC     | miRNA | miR-142-5p |
| t0076756 | 21 | 1 CATAAAGTGGAAGCACCCTACT     | miRNA | miR-142-5p |
| t0079733 | 21 | 1 CATAAAGTAGGAAGCACTACT      | miRNA | miR-142-5p |
| t0080647 | 20 | 1 CATAAAGTAGAAAGAACTAC       | miRNA | miR-142-5p |
| t0081157 | 19 | 1 CATAAAGTAGAAAGCGCTA        | miRNA | miR-142-5p |
| t0084520 | 18 | 1 CATAAAGTAGAAAGCACC         | miRNA | miR-142-5p |
| t0085380 | 21 | 1 ACCATAAAGTAGAAAGCACTA      | miRNA | miR-142-5p |
| t0087475 | 18 | 1 TCCATAAAGTAGGAAGCA         | miRNA | miR-142-5p |
| t0091549 | 20 | 1 CATAAAGTGGAAGCACTAG        | miRNA | miR-142-5p |
| t0092161 | 19 | 1 TATAAAGTAGAAAGCACTA        | miRNA | miR-142-5p |
| t0045864 | 21 | 1 CATAAAGAAGAAAGCACTACT      | miRNA | miR-142-5p |
| t0049122 | 21 | 1 CATAAAGGAGAAAGCACCCTACT    | miRNA | miR-142-5p |
| t0049929 | 21 | 1 CATAAAGTAGAAAGCACCACC      | miRNA | miR-142-5p |
| t0051342 | 21 | 1 CATAAAGGAGAAAGCACTACT      | miRNA | miR-142-5p |
| t0051839 | 22 | 1 ATAAAGTAGAAAGAAATACTAA     | miRNA | miR-142-5p |
| t0053303 | 21 | 1 CACATAAAGTAGAAAGCACTA      | miRNA | miR-142-5p |
| t0053840 | 19 | 1 CATAAAGTAGAAAGAAATA        | miRNA | miR-142-5p |
| t0054585 | 21 | 1 GTGGTGTTCCTACTTTATGG       | miRNA | miR-142-3p |
| t0054875 | 22 | 1 GTAGTGTTCCTACTTTATAGT      | miRNA | miR-142-3p |
| t0057833 | 21 | 1 GTAGTGTTCCTACTTTATGG       | miRNA | miR-142-3p |

|          |    |                             |       |            |
|----------|----|-----------------------------|-------|------------|
| t0065323 | 21 | 1 GTAGGGTTTCCTACTTTATGG     | miRNA | miR-142-3p |
| t0066279 | 22 | 1 GTAGTGGTTTCCTACTTTATGGT   | miRNA | miR-142-3p |
| t0069859 | 22 | 1 GTAGTATTTTCCTACTTTATGGA   | miRNA | miR-142-3p |
| t0072062 | 21 | 1 GTAGAGTTTCCTACTTTATGG     | miRNA | miR-142-3p |
| t0075907 | 22 | 1 GTAGTGTTCCTACTTTATGGA     | miRNA | miR-142-3p |
| t0087472 | 21 | 1 GTAGTGTTCCTACTTTATGG      | miRNA | miR-142-3p |
| t0087934 | 21 | 1 GTAGCGTTTCCTACTTTATGG     | miRNA | miR-142-3p |
| t0088879 | 21 | 1 GTAGTGTTCCTACTTTATGG      | miRNA | miR-142-3p |
| t0090137 | 23 | 1 GTAGGGTTTCCTACTTTATGGCA   | miRNA | miR-142-3p |
| t0092984 | 21 | 1 GTAGTGTTCCTACTTTAAGG      | miRNA | miR-142-3p |
| t0045971 | 18 | 1 CCCATAAAGTAGGAAGCA        | miRNA | miR-142    |
| t0046284 | 19 | 1 CCCATAAAGTAGCAAGAAC       | miRNA | miR-142    |
| t0047490 | 19 | 1 CCCATGAAGTAGAAAGCAC       | miRNA | miR-142    |
| t0049524 | 20 | 1 CCTATAAAGTAGAAAGCAAT      | miRNA | miR-142    |
| t0052242 | 21 | 1 CCCATAAAGTAGAAAGCACTT     | miRNA | miR-142    |
| t0054581 | 22 | 1 CCCATAAAGTAGAAAGCAATAC    | miRNA | miR-142    |
| t0056479 | 19 | 1 CCCATAAAGTAGAAAACAC       | miRNA | miR-142    |
| t0057812 | 20 | 1 CCATAAAGTAGAAAGCACTA      | miRNA | miR-142    |
| t0069432 | 22 | 1 CCTATAAAGTAGAAAGCACTAT    | miRNA | miR-142    |
| t0073891 | 22 | 1 CCCACAAAGTAGAAAGCACTAA    | miRNA | miR-142    |
| t0078902 | 20 | 1 CCCATAAAGTAGAAAACACT      | miRNA | miR-142    |
| t0083791 | 22 | 1 CCCATAAAGTAGATAGCACTAA    | miRNA | miR-142    |
| t0092736 | 18 | 1 CCCATAAAGTAGCAAGCA        | miRNA | miR-142    |
| t0041417 | 20 | 1 CCCATAAAGAAGAAAACACT      | miRNA | miR-142    |
| t0045182 | 20 | 1 CCCATAGAGTAGAAAGCACT      | miRNA | miR-142    |
| t0045853 | 21 | 1 CCCATAAAGTAGCAAGCACTA     | miRNA | miR-142    |
| t0045987 | 20 | 1 CCCATAAAGCAGAACGCACT      | miRNA | miR-142    |
| t0048149 | 20 | 1 CCCATAAAGTAGAAAGCACA      | miRNA | miR-142    |
| t0049345 | 22 | 1 CCCATAAAGTAGAAAGAACTAT    | miRNA | miR-142    |
| t0049623 | 20 | 1 CCCATAAAGGTAGAAAGCACT     | miRNA | miR-142    |
| t0050660 | 20 | 1 CCCATAAAGTAGAAAGAATT      | miRNA | miR-142    |
| t0050706 | 22 | 1 CCCAAAAGTAGAAAGCACTAA     | miRNA | miR-142    |
| t0051349 | 20 | 1 CCCATAAACTAGAAAGCACT      | miRNA | miR-142    |
| t0055360 | 20 | 1 CCCATAAAGTAGAAACCCT       | miRNA | miR-142    |
| t0056686 | 18 | 1 CCCATGAAGTAGAAAGCA        | miRNA | miR-142    |
| t0057201 | 20 | 1 CCCTTAAAGTAGAAAGCACT      | miRNA | miR-142    |
| t0061419 | 22 | 1 CCCATAAAGTAGAAAGAAGTAG    | miRNA | miR-142    |
| t0062224 | 19 | 1 CCTATAAAGTAGAAAGCAC       | miRNA | miR-142    |
| t0062256 | 20 | 1 CCTATCAAGTAGAAAGCACT      | miRNA | miR-142    |
| t0064449 | 18 | 1 CCCGTAAAGTAGAAAGCA        | miRNA | miR-142    |
| t0065057 | 21 | 1 CCCATAAAGTAGAAAGATCTA     | miRNA | miR-142    |
| t0065423 | 23 | 1 CCCATAAAGTAGAAAGCACTCGA   | miRNA | miR-142    |
| t0066521 | 22 | 1 CCCATAAAGTGGAAGCACTAT     | miRNA | miR-142    |
| t0067371 | 19 | 1 CCCAAAAGTAGAAAGCAC        | miRNA | miR-142    |
| t0068740 | 20 | 1 CCCATATAGTAGAAAGCACT      | miRNA | miR-142    |
| t0069672 | 19 | 1 CCCACAAAGTAGAAAGCAC       | miRNA | miR-142    |
| t0069788 | 21 | 1 CCCATAAAGTAGAACGCACTA     | miRNA | miR-142    |
| t0070705 | 20 | 1 CCCATAAAGTAGAAAGCGCT      | miRNA | miR-142    |
| t0071542 | 25 | 1 CCCATAAAGTAGAAAGCACTGCATC | miRNA | miR-142    |
| t0074563 | 21 | 1 CCCATAAAGTAGAACGAACTA     | miRNA | miR-142    |
| t0074608 | 20 | 1 CATAAAGTAGAAAGCACTCA      | miRNA | miR-142    |
| t0074890 | 21 | 1 CCCTATAAAGTAGAAAGCACT     | miRNA | miR-142    |
| t0075609 | 20 | 1 CCCACAAAGTAGAAAGCACT      | miRNA | miR-142    |
| t0075733 | 20 | 1 CCCATAAAGTATAAAGCCCT      | miRNA | miR-142    |
| t0076030 | 20 | 1 CCCATAAAGTAGGAAGCACT      | miRNA | miR-142    |
| t0076543 | 21 | 1 CCCATAAAGTACAAAGCACTA     | miRNA | miR-142    |
| t0077397 | 23 | 1 TACCCTGGGTAGAATCACGGAT    | miRNA | miR-140    |
| t0080540 | 24 | 1 TACCACAGGGTACAACCAAGGACG  | miRNA | miR-140    |

|          |    |                             |       |         |
|----------|----|-----------------------------|-------|---------|
| t0081117 | 22 | 1 TAACACAGGGTAGAACTACGGA    | miRNA | miR-140 |
| t0081156 | 23 | 1 ACCACAGGGTAGAATCACGGAAA   | miRNA | miR-140 |
| t0084327 | 22 | 1 TACAACAAGGTAGAACCACGGA    | miRNA | miR-140 |
| t0084775 | 23 | 1 ACCCCAGGGTAGAACCACGGACT   | miRNA | miR-140 |
| t0088404 | 23 | 1 ACCACAGGGTAGGACCACGGACG   | miRNA | miR-140 |
| t0088808 | 21 | 1 CCACAGGGGAGAACCACGGAC     | miRNA | miR-140 |
| t0090354 | 24 | 1 TACCGCAGGGTAGAACCACGGACT  | miRNA | miR-140 |
| t0091489 | 23 | 1 TACCACAGGGTGAACCACAGAA    | miRNA | miR-140 |
| t0093046 | 22 | 1 ACAACAGGGTAGAACCACGGAG    | miRNA | miR-140 |
| t0093148 | 22 | 1 TACCACAGGGTCGAACTACGGA    | miRNA | miR-140 |
| t0093195 | 23 | 1 ACCACAGGGTAGAACAACGGAAT   | miRNA | miR-140 |
| t0040675 | 21 | 1 ACCAAAGGGTAGAACCAAGGA     | miRNA | miR-140 |
| t0040690 | 24 | 1 TGCCACAGGGTAGAACCACGGACG  | miRNA | miR-140 |
| t0040811 | 23 | 1 ACCACAGGGTAGAAACACGGAAG   | miRNA | miR-140 |
| t0040876 | 23 | 1 ACCACGGGGTAGAACCACGGACG   | miRNA | miR-140 |
| t0041069 | 22 | 1 ACCACAGGGTAGAACCAGGGCA    | miRNA | miR-140 |
| t0041132 | 24 | 1 TACCACAGGGTAGAACCCTCGGTAA | miRNA | miR-140 |
| t0041239 | 21 | 1 ACCACGGGGAGAACCACGGGA     | miRNA | miR-140 |
| t0041310 | 22 | 1 TACCACAGGGCAGAACTACGGA    | miRNA | miR-140 |
| t0041344 | 24 | 1 TACCACAGGGTAGAATCACAGACA  | miRNA | miR-140 |
| t0041444 | 23 | 1 TACCACAGGGCAGCACCACGGAC   | miRNA | miR-140 |
| t0041487 | 22 | 1 TACCACATGGTAGAACCACGGC    | miRNA | miR-140 |
| t0041641 | 22 | 1 ACCACAGGGTAGAAGCACGGAC    | miRNA | miR-140 |
| t0041725 | 23 | 1 ACCACAGGGTAGCACCATGGACG   | miRNA | miR-140 |
| t0041832 | 23 | 1 ACCACATGGTAGAACCACGGACT   | miRNA | miR-140 |
| t0041837 | 21 | 1 ACCACAGGGGAAGAACTACGGA    | miRNA | miR-140 |
| t0041900 | 24 | 1 TACCACAGGGTAGAAACACGGACT  | miRNA | miR-140 |
| t0041953 | 22 | 1 TACCACAGGGTAGAAACACGGT    | miRNA | miR-140 |
| t0042032 | 22 | 1 ACGACAGGGTAGAACCACGGAT    | miRNA | miR-140 |
| t0042124 | 21 | 1 CCACAGGGTACAACCACGGAT     | miRNA | miR-140 |
| t0042278 | 24 | 1 TACCACAGGGTAGAAACACGGATA  | miRNA | miR-140 |
| t0042403 | 23 | 1 ACCACAGGGTAGGACCACGGACT   | miRNA | miR-140 |
| t0042405 | 24 | 1 TACCACAGGGTACAACCATGGACG  | miRNA | miR-140 |
| t0042444 | 23 | 1 ACCACAGGGTAGAAGCACGGACA   | miRNA | miR-140 |
| t0042516 | 24 | 1 TAACACAGGGTAGAACCACGGACG  | miRNA | miR-140 |
| t0042525 | 22 | 1 TACCACAGGGTAGAACCAAGGC    | miRNA | miR-140 |
| t0042528 | 21 | 1 CCACAGGGTAGAACCACGGCT     | miRNA | miR-140 |
| t0042712 | 22 | 1 CCACAGGGTAGAACCCTCGGACT   | miRNA | miR-140 |
| t0042738 | 22 | 1 ACCACAGGGTAGAACCACGGAT    | miRNA | miR-140 |
| t0042797 | 23 | 1 ACCACAGGGTAGAACTACGGGCA   | miRNA | miR-140 |
| t0042874 | 23 | 1 GCCACAGGGTAGAACCAAGGACA   | miRNA | miR-140 |
| t0042936 | 21 | 1 CCACAGGGTCGAACCACGGAT     | miRNA | miR-140 |
| t0042953 | 23 | 1 ACAACAGGGTAGAACCAAGGACG   | miRNA | miR-140 |
| t0042986 | 24 | 1 TACCACAGGGGAGAACAACGGACA  | miRNA | miR-140 |
| t0043000 | 22 | 1 TACCACAGGGGAAGAACTACGGA   | miRNA | miR-140 |
| t0043033 | 23 | 1 TACCAGAGGGTAGAACCACGGAA   | miRNA | miR-140 |
| t0043160 | 21 | 1 ACCACAGAGTAGAACTACGGA     | miRNA | miR-140 |
| t0043251 | 21 | 1 ACTACGGGGTAGAACCACGGA     | miRNA | miR-140 |
| t0043391 | 24 | 1 TACCACAGGGTAGAACCACGGCGT  | miRNA | miR-140 |
| t0043399 | 22 | 1 TACCACAGGGTATAACTACGGA    | miRNA | miR-140 |
| t0043462 | 19 | 1 CACAGGGTAGAACAACGGA       | miRNA | miR-140 |
| t0043468 | 21 | 1 ACCACAGGGTAAAACAACGGA     | miRNA | miR-140 |
| t0043544 | 22 | 1 ACCACAGGGTCGAACCACGGAG    | miRNA | miR-140 |
| t0043558 | 24 | 1 TACCACAGGGTAGACCCACGGACA  | miRNA | miR-140 |
| t0043729 | 23 | 1 TAACACAGGGTAGAACAACGGAA   | miRNA | miR-140 |
| t0043792 | 23 | 1 TACCACAGGGTAGAACCAAGAAC   | miRNA | miR-140 |
| t0043884 | 23 | 1 TACCACAGGGTAGATCCAAGGAA   | miRNA | miR-140 |
| t0043890 | 23 | 1 ACCACAGGGTAGAAAAACGGACA   | miRNA | miR-140 |



|          |    |                              |       |         |
|----------|----|------------------------------|-------|---------|
| t0043895 | 21 | 1 TACCACAGGGTGAACACGG        | miRNA | miR-140 |
| t0043984 | 22 | 1 ACCACAGGGTAGAGCCACGGAG     | miRNA | miR-140 |
| t0043992 | 21 | 1 ACTACAGGGTAGAAACACGGA      | miRNA | miR-140 |
| t0044017 | 23 | 1 TAACAAAGGGTAGAACCACGGAA    | miRNA | miR-140 |
| t0044094 | 24 | 1 TACCACAGGGGAGAACCACGGATC   | miRNA | miR-140 |
| t0044224 | 24 | 1 CTACCACAGGGTAGAACCACGGCC   | miRNA | miR-140 |
| t0044310 | 22 | 1 TAGCACAGGGTAGAACCCCGGA     | miRNA | miR-140 |
| t0044334 | 22 | 1 AACACAGGGTAGAAACACGGAA     | miRNA | miR-140 |
| t0044459 | 21 | 1 ACCACAGGGCAGAACTACGGA      | miRNA | miR-140 |
| t0044568 | 22 | 1 GCCACAGGGTAGAACCACGGAG     | miRNA | miR-140 |
| t0044601 | 23 | 1 TACCACACGGTAGAACCCCGGAC    | miRNA | miR-140 |
| t0044626 | 23 | 1 ACCACAGGGTAGAACCCCGGAAA    | miRNA | miR-140 |
| t0044652 | 22 | 1 TACCACAAGGTAGAACAACGGA     | miRNA | miR-140 |
| t0044706 | 22 | 1 TACCCTAGGGTAGAACCACGGA     | miRNA | miR-140 |
| t0044738 | 24 | 1 TACCACAGGGTAGAACCCCGGGCA   | miRNA | miR-140 |
| t0044791 | 23 | 1 TCCACAGGGTAGAACCACGGACA    | miRNA | miR-140 |
| t0045111 | 24 | 1 ACAACAGGGTAGAACCACGGAAGA   | miRNA | miR-140 |
| t0045202 | 22 | 1 TACCACAGGGTAGAACTGCGGA     | miRNA | miR-140 |
| t0045217 | 23 | 1 TACCACAGGGTAGAAATACGGAC    | miRNA | miR-140 |
| t0045238 | 22 | 1 ACCACAGGGTAGAAGCACGGAT     | miRNA | miR-140 |
| t0045292 | 24 | 1 TACCACAGGGTAGAACCACGGCTA   | miRNA | miR-140 |
| t0045349 | 24 | 1 TACCCTAGGGTAGAACCACGGACT   | miRNA | miR-140 |
| t0045421 | 20 | 1 CCACAGGGTAAAACACGGA        | miRNA | miR-140 |
| t0045429 | 21 | 1 ACCACAGGGTAGAACTATGGA      | miRNA | miR-140 |
| t0045608 | 23 | 1 TACCACAGGGTCGAACTACGGAA    | miRNA | miR-140 |
| t0045616 | 26 | 1 TACCACAGGGTAGAACAACGGACAAT | miRNA | miR-140 |
| t0045657 | 23 | 1 ACAACAGGGTAGAACCACGGCCT    | miRNA | miR-140 |
| t0045725 | 23 | 1 TACCACAGGGCAGAACACGGCC     | miRNA | miR-140 |
| t0045751 | 23 | 1 ACCACAGGGTAGAACCCCGGACG    | miRNA | miR-140 |
| t0045866 | 21 | 1 ACCACAAGTTAGAACCACGGA      | miRNA | miR-140 |
| t0045972 | 23 | 1 TACCATAGGGTAGAACCACGGCA    | miRNA | miR-140 |
| t0046064 | 21 | 1 GCCACAGGGGAGAACCACGGA      | miRNA | miR-140 |
| t0046210 | 24 | 1 TACCATAGGGTAGAACCACGGAAA   | miRNA | miR-140 |
| t0046262 | 21 | 1 ACCACAGGGTATAAACACGGA      | miRNA | miR-140 |
| t0046265 | 23 | 1 TACCACAGGGCAGAACACGGCA     | miRNA | miR-140 |
| t0046308 | 21 | 1 ACCACAGGGCAGAACTACGGA      | miRNA | miR-140 |
| t0046441 | 22 | 1 ACCACAGGATAGAACCACGGAT     | miRNA | miR-140 |
| t0046525 | 21 | 1 ACAACAGGGTAGAACCAAGGA      | miRNA | miR-140 |
| t0046527 | 21 | 1 ACCACAGGGATGAACCACGGA      | miRNA | miR-140 |
| t0046574 | 22 | 1 ACCACAGGGTAGAACCGCGGAG     | miRNA | miR-140 |
| t0046588 | 21 | 1 TACCACAGGGTAGCACCACGG      | miRNA | miR-140 |
| t0046589 | 23 | 1 TACCACAGGGGAGAACCPCGGAC    | miRNA | miR-140 |
| t0046698 | 21 | 1 ACCACAGGGTAGAACCTCGGC      | miRNA | miR-140 |
| t0046875 | 23 | 1 TACAACAGGGTAGAACCACGGAG    | miRNA | miR-140 |
| t0046899 | 23 | 1 ACCACAGGGAAGAACCACGGACC    | miRNA | miR-140 |
| t0046941 | 23 | 1 ACCACAGGGTAGAACACAGATA     | miRNA | miR-140 |
| t0046985 | 23 | 1 AACACAGGGTAGAACACGGCCG     | miRNA | miR-140 |
| t0047283 | 22 | 1 TACCGTAGGGTAGAACACGGA      | miRNA | miR-140 |
| t0047334 | 24 | 1 TACCACAGGGGAGAACCAAGGACT   | miRNA | miR-140 |
| t0047393 | 23 | 1 ATCACAGGGTAGAACACGGACA     | miRNA | miR-140 |
| t0047441 | 23 | 1 TAACACAGGGTAGAAACACGGAC    | miRNA | miR-140 |
| t0047631 | 24 | 1 TACCACAGGGTAGAACACGGCGA    | miRNA | miR-140 |
| t0047653 | 24 | 1 TACCACAGGGTAGAATCACGGCCG   | miRNA | miR-140 |
| t0047993 | 24 | 1 TACCAAAGGGTAGAACACGGCCA    | miRNA | miR-140 |
| t0048006 | 23 | 1 ACCACAGGCTAGAACCACGGACT    | miRNA | miR-140 |
| t0048029 | 21 | 1 ACCACAGGTTAGAACCACGGC      | miRNA | miR-140 |
| t0048035 | 21 | 1 CCACATGGTAGAACTACGGAT      | miRNA | miR-140 |
| t0048070 | 23 | 1 ACCACAGGGTAGACCCACGGACT    | miRNA | miR-140 |

|          |    |                              |       |         |
|----------|----|------------------------------|-------|---------|
| t0048357 | 24 | 1 TACAATAGGGTAGAACCACGGACA   | miRNA | miR-140 |
| t0048387 | 23 | 1 ACCCCAGGGTAGAACCACGGATA    | miRNA | miR-140 |
| t0048489 | 24 | 1 TACCACAGGGTAGAACCACGCAGA   | miRNA | miR-140 |
| t0048529 | 24 | 1 ACCACAGGGTAGAACAACGGACAA   | miRNA | miR-140 |
| t0048573 | 21 | 1 CTACAGGGTAGAACCACGGAA      | miRNA | miR-140 |
| t0048658 | 22 | 1 ACCACAGGGAAAAACCACGGAC     | miRNA | miR-140 |
| t0048669 | 21 | 1 ATCACAGGGTAGAACCACGGC      | miRNA | miR-140 |
| t0048676 | 22 | 1 ACCACAGGGTAGAACTACGAAT     | miRNA | miR-140 |
| t0048714 | 23 | 1 ACCAAAGGGTAGAACCACGGACT    | miRNA | miR-140 |
| t0048735 | 23 | 1 ACCACAGGGTATAACCACGGACG    | miRNA | miR-140 |
| t0048813 | 23 | 1 AGCACAGGGTAGAACCACGGAGT    | miRNA | miR-140 |
| t0048827 | 20 | 1 CCACAGGGTATAACCACGGGA      | miRNA | miR-140 |
| t0048837 | 23 | 1 TACCACCGGGTAGAACCACGGCC    | miRNA | miR-140 |
| t0049017 | 24 | 1 TACCACAGGGTACAACCACGGACT   | miRNA | miR-140 |
| t0049131 | 22 | 1 TACCACAAGGTAGAACCAAGGA     | miRNA | miR-140 |
| t0049190 | 22 | 1 ACAACAGGGTAGAACAACGGAT     | miRNA | miR-140 |
| t0049200 | 20 | 1 CCACAGGGAAGAACCACGGGA      | miRNA | miR-140 |
| t0049243 | 21 | 1 TACCACAGAGTAGAACCACGG      | miRNA | miR-140 |
| t0049366 | 24 | 1 TACCACAGGGGACAACCACGGACG   | miRNA | miR-140 |
| t0049379 | 22 | 1 TACCACAGGGTAGAACTACTGA     | miRNA | miR-140 |
| t0049427 | 23 | 1 ACCAAAGGGTAGAACAACGGGAAG   | miRNA | miR-140 |
| t0049459 | 22 | 1 AACACAGGGTAGAACCAAGGAT     | miRNA | miR-140 |
| t0049625 | 24 | 1 TACCACAGGGTCGAACCACGGAAA   | miRNA | miR-140 |
| t0049696 | 23 | 1 TACCACAGGGTAGATCCACGGAT    | miRNA | miR-140 |
| t0049752 | 21 | 1 ACCAAAGGGTAGAACCACGGC      | miRNA | miR-140 |
| t0049756 | 22 | 1 ACCACAGGGTCGAACCACGGCC     | miRNA | miR-140 |
| t0049773 | 24 | 1 TACCACAGAGTAGAACCACGGACT   | miRNA | miR-140 |
| t0049868 | 22 | 1 TACCACAGTGTAGAACCACCGA     | miRNA | miR-140 |
| t0049872 | 23 | 1 TACAACAGGGTAGAACAACGGAC    | miRNA | miR-140 |
| t0049980 | 24 | 1 TACCAAAGGGTAGAACCACGGAAA   | miRNA | miR-140 |
| t0049988 | 22 | 1 TACCACAGGGTAGGACTACGGA     | miRNA | miR-140 |
| t0050010 | 23 | 1 TACCAGAGGGTAGAACCACGGCA    | miRNA | miR-140 |
| t0050075 | 24 | 1 TACGACAGGGTAGAACCACGGTCA   | miRNA | miR-140 |
| t0050078 | 23 | 1 TACCACACGGTAGAACCACGGAT    | miRNA | miR-140 |
| t0050190 | 22 | 1 ACCACCGGGTAGAACAACGGAC     | miRNA | miR-140 |
| t0050344 | 21 | 1 ACCACAGGGTAGACCCACGGC      | miRNA | miR-140 |
| t0050473 | 21 | 1 ACCACAGGGTAGAACAACGGC      | miRNA | miR-140 |
| t0050549 | 22 | 1 TACCACAGGGTATAACCTCGGA     | miRNA | miR-140 |
| t0050673 | 23 | 1 TACCAAAGGGTAGAACCACGAAC    | miRNA | miR-140 |
| t0050901 | 20 | 1 ACCACAGGGTAGAACCAGGG       | miRNA | miR-140 |
| t0050996 | 23 | 1 TACCACATGGTAGAACCACGGCC    | miRNA | miR-140 |
| t0051140 | 26 | 1 ACCACAGGGTAGAACCACGGAAGATA | miRNA | miR-140 |
| t0051172 | 23 | 1 TACCAGAGGGTAGAACCACGGGC    | miRNA | miR-140 |
| t0051247 | 23 | 1 ACCACAGGGTAGAACCACTGACA    | miRNA | miR-140 |
| t0051255 | 23 | 1 TCCACAGGGTAGAACCACGGAAA    | miRNA | miR-140 |
| t0051289 | 23 | 1 TACCCAGGGTAGAACCCCGGAA     | miRNA | miR-140 |
| t0051358 | 22 | 1 TACCGCAGGGTAGAACTACGGA     | miRNA | miR-140 |
| t0051399 | 23 | 1 TACCACAGGGTAGAGCTACGGAA    | miRNA | miR-140 |
| t0051576 | 22 | 1 TACCACAGGGTAGAGCCACGGT     | miRNA | miR-140 |
| t0051590 | 22 | 1 TAACACAGGGTAGAATCACGGA     | miRNA | miR-140 |
| t0051791 | 26 | 1 TACCACAGGGTAGAACCACGGCCAGA | miRNA | miR-140 |
| t0051805 | 21 | 1 ATCACAGGGTAGAACTACGGA      | miRNA | miR-140 |
| t0051831 | 24 | 1 TACCACATGGTGGAACCACGGAAA   | miRNA | miR-140 |
| t0051878 | 23 | 1 TACCACAGGGTAGAACCCCGGCG    | miRNA | miR-140 |
| t0051962 | 23 | 1 TACCATAGGGTAGAACCACGGGC    | miRNA | miR-140 |
| t0052012 | 23 | 1 TACCACAGGGTAGAAACACGGTA    | miRNA | miR-140 |
| t0052048 | 23 | 1 TACCACAGGGTAGACACACGGAC    | miRNA | miR-140 |
| t0052106 | 23 | 1 TACCACAGGGTAGAAACACCGAA    | miRNA | miR-140 |

|          |    |                               |       |         |
|----------|----|-------------------------------|-------|---------|
| t0052287 | 21 | 1 ACCACAGGGTAGAATAACGGA       | miRNA | miR-140 |
| t0052335 | 23 | 1 TACCACAGGTTAGAACCACGGAA     | miRNA | miR-140 |
| t0052394 | 22 | 1 ACCACAGGGTTGAACCACGGAC      | miRNA | miR-140 |
| t0052447 | 23 | 1 ATCACAGGGTAGAACCACGGACT     | miRNA | miR-140 |
| t0052555 | 24 | 1 TACCACAGGGTAGAACCATGGACG    | miRNA | miR-140 |
| t0052666 | 23 | 1 ACCACAGGGTAGAACCATGGACT     | miRNA | miR-140 |
| t0052732 | 22 | 1 ACCACAGGGTAGAAGCACGGAG      | miRNA | miR-140 |
| t0052737 | 22 | 1 ACCACAGGGTAGCACAACGGAC      | miRNA | miR-140 |
| t0052765 | 23 | 1 TACCACAGGGTAGAACCACGAAG     | miRNA | miR-140 |
| t0052802 | 23 | 1 TACCATAGGGTAGAACCCCGGAA     | miRNA | miR-140 |
| t0052823 | 22 | 1 CACCACAGGGTAGAACCAAGGA      | miRNA | miR-140 |
| t0052876 | 23 | 1 TACACAGGGTAGAACCACGGACG     | miRNA | miR-140 |
| t0052923 | 27 | 1 ACCACAGGGTAGAACCACGGACGAATC | miRNA | miR-140 |
| t0052938 | 22 | 1 TACCACAGGATAGAACCCCGGA      | miRNA | miR-140 |
| t0052950 | 21 | 1 ACCACATGGTAGAACAACGGA       | miRNA | miR-140 |
| t0052955 | 20 | 1 CCACAGGGTAGAACCACGGC        | miRNA | miR-140 |
| t0052970 | 20 | 1 CACAGGGTAGAACCACGGTA        | miRNA | miR-140 |
| t0052986 | 24 | 1 TATCACAGGGTAGAACCACGGCAA    | miRNA | miR-140 |
| t0053179 | 20 | 1 ACCACAGGGTAGAACTGCGG        | miRNA | miR-140 |
| t0053340 | 24 | 1 TACCACAGGGTAGAACCACGACAA    | miRNA | miR-140 |
| t0053417 | 22 | 1 TACCACAGGGCAGAACCACGGT      | miRNA | miR-140 |
| t0053530 | 21 | 1 ACCACAGGGCAGAACCAAGGA       | miRNA | miR-140 |
| t0053667 | 23 | 1 TACCACAGGGTAGAAACACGGCA     | miRNA | miR-140 |
| t0053719 | 24 | 1 ACCACAGGGTAGAACCGCGGAAGA    | miRNA | miR-140 |
| t0053731 | 20 | 1 CCACAGGGTAGACCCACGGA        | miRNA | miR-140 |
| t0053811 | 22 | 1 ACCACAGGGTACAACCAAGGAC      | miRNA | miR-140 |
| t0053816 | 23 | 1 TACCACAGGGGAGAACCACGGCA     | miRNA | miR-140 |
| t0053821 | 22 | 1 ACTACAGGGTAGAACCACGGAG      | miRNA | miR-140 |
| t0053901 | 23 | 1 CACCACAGGGTAGAACCCCGGAC     | miRNA | miR-140 |
| t0053966 | 24 | 1 TACCACAGGGTGAACCACGGACG     | miRNA | miR-140 |
| t0054023 | 22 | 1 AACACAGGGTAGAAACACGGAT      | miRNA | miR-140 |
| t0054057 | 23 | 1 ACCACAGGGTAGAACAACGGACG     | miRNA | miR-140 |
| t0054085 | 22 | 1 ACCACCGGGTAGAACCACGGCT      | miRNA | miR-140 |
| t0054137 | 22 | 1 ACCACAGGGTAGAACCACGCAC      | miRNA | miR-140 |
| t0054226 | 23 | 1 ACCACAGGGTAGAACCACGGTCT     | miRNA | miR-140 |
| t0054406 | 21 | 1 CCACAGGATAGAACCACGGAT       | miRNA | miR-140 |
| t0054423 | 21 | 1 CCACAGGGTATAACCACGGAA       | miRNA | miR-140 |
| t0054424 | 23 | 1 ACCACAGGGGAGAACCACGGATA     | miRNA | miR-140 |
| t0054446 | 23 | 1 TACGACAGGGTAGAACTACGGAC     | miRNA | miR-140 |
| t0054555 | 24 | 1 ACCACAGGGTAAAACCACGGAGGA    | miRNA | miR-140 |
| t0054589 | 23 | 1 TACAACAGGGTAGAACCAAGGAG     | miRNA | miR-140 |
| t0054764 | 21 | 1 CCACAGGGTAGAACCACGGCC       | miRNA | miR-140 |
| t0054863 | 22 | 1 TACCGCAGGGTAGAACCACGGC      | miRNA | miR-140 |
| t0054980 | 21 | 1 ACCACAGGCTAGAACCCCGGA       | miRNA | miR-140 |
| t0055021 | 22 | 1 ACAACAGGGTAGAACCCCGGAA      | miRNA | miR-140 |
| t0055030 | 21 | 1 ACCACAGGGAAGAACCAAGGA       | miRNA | miR-140 |
| t0055072 | 23 | 1 ACCACAGGGTGAACCACGGACT      | miRNA | miR-140 |
| t0055118 | 21 | 1 ACCACAGGGGAGAACCATGGA       | miRNA | miR-140 |
| t0055244 | 22 | 1 TACCACAGGGTAGCACCACGGT      | miRNA | miR-140 |
| t0055264 | 20 | 1 ACCACAGGATAAAAACCACGG       | miRNA | miR-140 |
| t0055326 | 22 | 1 ACCACATGGAAGAACCACGGAA      | miRNA | miR-140 |
| t0055446 | 22 | 1 ACCACAGGGTAGAACCACCGAG      | miRNA | miR-140 |
| t0055508 | 24 | 1 TACCACAGGGAAGAACCACGGAAA    | miRNA | miR-140 |
| t0055668 | 22 | 1 ACAACAGGGTAGAACCAAGGAC      | miRNA | miR-140 |
| t0055699 | 22 | 1 ACCACAGTGTAGAACCGCGGAA      | miRNA | miR-140 |
| t0055710 | 23 | 1 GACAACAGGGTAGAACCACGGAA     | miRNA | miR-140 |
| t0055760 | 23 | 1 TACCACGGGGTAGAACCACGGCA     | miRNA | miR-140 |
| t0055766 | 23 | 1 TACCACAGGGTAGAACTACGGCA     | miRNA | miR-140 |

|          |    |                              |       |         |
|----------|----|------------------------------|-------|---------|
| t0055768 | 23 | 1 TACCGCAGGGTAGAACCACGGAG    | miRNA | miR-140 |
| t0055801 | 24 | 1 TACCACAGGGTAGAACCACGTCCG   | miRNA | miR-140 |
| t0055868 | 23 | 1 TACAACAGGGTAGCACCACGGAA    | miRNA | miR-140 |
| t0055933 | 21 | 1 TATCACAGGGTAGAACCACGG      | miRNA | miR-140 |
| t0056019 | 22 | 1 ACAACAGGGTAGAACCACGGTC     | miRNA | miR-140 |
| t0056023 | 26 | 1 ACCACAGGGGAGAACCACGGACGGTG | miRNA | miR-140 |
| t0056084 | 22 | 1 TACCAAAGGGAAGAACCACGGGA    | miRNA | miR-140 |
| t0056110 | 23 | 1 TACCACCGGGTAGAACTACGGAA    | miRNA | miR-140 |
| t0056227 | 22 | 1 TACCGCACGGTAGAACCACGGGA    | miRNA | miR-140 |
| t0056239 | 23 | 1 TACCACCGGGTAGAACCCCGGAC    | miRNA | miR-140 |
| t0056441 | 24 | 1 TACCACAGGGTAGAACCACGGGAA   | miRNA | miR-140 |
| t0056467 | 22 | 1 ACCCCAGGGTAGAACCACGGAT     | miRNA | miR-140 |
| t0056472 | 24 | 1 TACCACAGGGTAGAACACCGGACA   | miRNA | miR-140 |
| t0056544 | 22 | 1 ACCTCAGGGTAGAACCACGGAT     | miRNA | miR-140 |
| t0056569 | 22 | 1 ACCACGGGGTAGAACCGCGGAC     | miRNA | miR-140 |
| t0056590 | 23 | 1 TACAACAGGGTAGAACACGGAA     | miRNA | miR-140 |
| t0056728 | 22 | 1 TACCGCAGGGGAGAACCACGGGA    | miRNA | miR-140 |
| t0056807 | 23 | 1 TACCACAGGGTAGAAGCACGGAG    | miRNA | miR-140 |
| t0056891 | 23 | 1 TACCACATGGTAGAACCACGGAG    | miRNA | miR-140 |
| t0056944 | 21 | 1 CCACAGGGTAGAATCACGGAT      | miRNA | miR-140 |
| t0056956 | 25 | 1 TACCACAGGGGAGAACCACGGACAA  | miRNA | miR-140 |
| t0057030 | 23 | 1 TACAACAGGGTAGAAACACGGAA    | miRNA | miR-140 |
| t0057065 | 25 | 1 TACCACAGGGTAGAACCACGGGTAA  | miRNA | miR-140 |
| t0057242 | 22 | 1 TACCACAGGGTGAACACAGAG      | miRNA | miR-140 |
| t0057339 | 22 | 1 ACCACAGGGTAGAACAAAGGAC     | miRNA | miR-140 |
| t0057548 | 23 | 1 TACCACAGGGTAGAACTACGGCT    | miRNA | miR-140 |
| t0057567 | 23 | 1 TACCACAGGGTAGAAACAAGGAG    | miRNA | miR-140 |
| t0057604 | 21 | 1 ACGACAGGGTAGAACCACGGC      | miRNA | miR-140 |
| t0057616 | 25 | 1 TACCACAGGGTAGAACCACGGACAC  | miRNA | miR-140 |
| t0057666 | 23 | 1 TACCACAGGGTATAACCCCGGAA    | miRNA | miR-140 |
| t0057685 | 20 | 1 ACCACAGGGTAGAACCATGG       | miRNA | miR-140 |
| t0057745 | 23 | 1 TACCACAGGGTAGGACCATGGAC    | miRNA | miR-140 |
| t0057773 | 21 | 1 ACCACAGGGAAGAACCACGTA      | miRNA | miR-140 |
| t0057879 | 22 | 1 ACCACAGGGGAGAACCACGGCG     | miRNA | miR-140 |
| t0057909 | 23 | 1 ACCACAGGGCAGAACCACGGACT    | miRNA | miR-140 |
| t0057971 | 22 | 1 TACCACAGAGTAGAAACACGGGA    | miRNA | miR-140 |
| t0058064 | 21 | 1 ACCACAGGGTAGAACCAAGAA      | miRNA | miR-140 |
| t0058094 | 24 | 1 TACCACAGGGTAGAAACAAGGACG   | miRNA | miR-140 |
| t0058312 | 20 | 1 ACCACATGGTAGAACCACGG       | miRNA | miR-140 |
| t0058402 | 23 | 1 GACCACAGGGTAGAATCACGGAC    | miRNA | miR-140 |
| t0058477 | 22 | 1 CACCACAGGGTAGAACCACGGC     | miRNA | miR-140 |
| t0058502 | 23 | 1 ACAACAGGGTAGAACACGGACG     | miRNA | miR-140 |
| t0058565 | 22 | 1 TCCCACCGGGTAGAACCACGGGA    | miRNA | miR-140 |
| t0058630 | 24 | 1 TACCACAGGGTAGAACACGGACT    | miRNA | miR-140 |
| t0058654 | 22 | 1 ACCACAGGGTAGAACCAAGGAA     | miRNA | miR-140 |
| t0058744 | 21 | 1 ACCACAGGTTAGGACCACGGGA     | miRNA | miR-140 |
| t0058751 | 22 | 1 ACCACAGGGTAGAACTGCGGAT     | miRNA | miR-140 |
| t0058803 | 24 | 1 TAACACAGGGTACAACCACGGACG   | miRNA | miR-140 |
| t0058810 | 23 | 1 ACCACAGGGTACAACCACGGAAA    | miRNA | miR-140 |
| t0058811 | 21 | 1 CCCACAGGGTAGAACACGGGA      | miRNA | miR-140 |
| t0058884 | 25 | 1 ACCACAGGGTAGAACACGGCCATC   | miRNA | miR-140 |
| t0059084 | 24 | 1 TACCACGGGGTAGAACCACGGGAAT  | miRNA | miR-140 |
| t0059328 | 22 | 1 ACCACAGGGTAGAACGACGGAT     | miRNA | miR-140 |
| t0059338 | 23 | 1 ACCACAGGGAAGAACCACGGAGA    | miRNA | miR-140 |
| t0059396 | 28 | 1 AACACAGGGTAGAACACGGACAAAAA | miRNA | miR-140 |
| t0059675 | 21 | 1 ACCGCAGGGTAGAACTACGGGA     | miRNA | miR-140 |
| t0059730 | 20 | 1 ACCACAGGATAGAACACGG        | miRNA | miR-140 |
| t0059741 | 22 | 1 TACCACAGGGTAGAGCTACGGGA    | miRNA | miR-140 |

|          |    |                              |       |         |
|----------|----|------------------------------|-------|---------|
| t0059901 | 22 | 1 TACCACAGGGTATAACCACAGA     | miRNA | miR-140 |
| t0059972 | 24 | 1 TACCACAGGGTAGAACCACGTAAT   | miRNA | miR-140 |
| t0060035 | 21 | 1 ACCACAAGGTAGACCCACGGA      | miRNA | miR-140 |
| t0060061 | 22 | 1 ACCACAGGGTAGAACCACCGAA     | miRNA | miR-140 |
| t0060187 | 23 | 1 ACCACAGGGTAGAACAACGGAAG    | miRNA | miR-140 |
| t0060251 | 22 | 1 ACCACAAGGTAGAACCAAGGAA     | miRNA | miR-140 |
| t0060268 | 23 | 1 AACCACAGGGTAGAACCACGGGT    | miRNA | miR-140 |
| t0060280 | 23 | 1 TACCATAGGGTAGAACCACGGAG    | miRNA | miR-140 |
| t0060367 | 22 | 1 ACCACAGGGAAGAACCAAGGAT     | miRNA | miR-140 |
| t0060638 | 22 | 1 ACCACAGGGTAAAACCACGGAG     | miRNA | miR-140 |
| t0060654 | 20 | 1 ACCACAGGGTAGAACCACTG       | miRNA | miR-140 |
| t0060855 | 22 | 1 ACCACAGGGAAGAACAACGGAC     | miRNA | miR-140 |
| t0060906 | 21 | 1 ACCACAGGGTAGAAACCCGGA      | miRNA | miR-140 |
| t0060980 | 22 | 1 CCCACAGGGTAGAACCACGGAA     | miRNA | miR-140 |
| t0060995 | 21 | 1 ACCACACGGTAGAATCACGGA      | miRNA | miR-140 |
| t0061080 | 23 | 1 TACCACAGGGTACAACCCCGGAA    | miRNA | miR-140 |
| t0061107 | 23 | 1 TACCACAGGGTCGAACCACGGAT    | miRNA | miR-140 |
| t0061131 | 23 | 1 ACCACAGGGTAGAGCCACGGACT    | miRNA | miR-140 |
| t0061159 | 23 | 1 TACCACCTGGTAGAACCACGGAA    | miRNA | miR-140 |
| t0061170 | 22 | 1 ACCACAAGGTAGAACCACGGAG     | miRNA | miR-140 |
| t0061180 | 23 | 1 TACCACAGGGGAGAACCACGGCC    | miRNA | miR-140 |
| t0061258 | 20 | 1 CCACAGGGCAGAACCACGGA       | miRNA | miR-140 |
| t0061329 | 22 | 1 ATCACAGGGAAGAACCACGGAA     | miRNA | miR-140 |
| t0061385 | 23 | 1 CACCACAGGGTAGAGCCACGGAA    | miRNA | miR-140 |
| t0061410 | 23 | 1 ACCACAGGTTAGAACCACGGACT    | miRNA | miR-140 |
| t0061457 | 21 | 1 ACCACAGGGGAGAATCACGGA      | miRNA | miR-140 |
| t0061466 | 21 | 1 ACCACAGTGTAGAACCAGGGA      | miRNA | miR-140 |
| t0061520 | 23 | 1 ACCACAGGGTAGAACCACGCAGA    | miRNA | miR-140 |
| t0061721 | 26 | 1 ACCACAGGGTAGAACCACGGCCGGCC | miRNA | miR-140 |
| t0061729 | 20 | 1 TACCACAGGGGAGAACCACG       | miRNA | miR-140 |
| t0061778 | 22 | 1 CCACAGGGTAGAAAAACGGACA     | miRNA | miR-140 |
| t0061818 | 24 | 1 AACCACAGGGTAGAACCACGGACG   | miRNA | miR-140 |
| t0061878 | 23 | 1 ACCACAGGGTAGAACCACGGAAC    | miRNA | miR-140 |
| t0061892 | 24 | 1 TACGACAGGGTAGAACCACGGAAA   | miRNA | miR-140 |
| t0061920 | 23 | 1 TACCACAGGGTAGAATCACGGCA    | miRNA | miR-140 |
| t0061941 | 23 | 1 ACCACAGGGTAGAACCAAGGAAT    | miRNA | miR-140 |
| t0061959 | 20 | 1 CCACAGGATAGAACCACGGA       | miRNA | miR-140 |
| t0061970 | 23 | 1 ACCACAGGGGAGAACCACGGATT    | miRNA | miR-140 |
| t0062007 | 24 | 1 ACAACAGGGTAGAACCACGGCAGA   | miRNA | miR-140 |
| t0062125 | 23 | 1 ACCACAGGGTAGAAACACGGACC    | miRNA | miR-140 |
| t0062151 | 23 | 1 TACCACAGGGGAGAATCACGGAC    | miRNA | miR-140 |
| t0062182 | 23 | 1 ACCACAGGGAAGAACCACGGATG    | miRNA | miR-140 |
| t0062257 | 23 | 1 ACCACAGGGTAGCACCACGGACA    | miRNA | miR-140 |
| t0062375 | 21 | 1 ACCACAGGGTAGAATCCCGGA      | miRNA | miR-140 |
| t0062438 | 23 | 1 TACCACAGGGTAGAACCATGGCC    | miRNA | miR-140 |
| t0062502 | 24 | 1 TAGCACAGGGTAGAACCACGGACG   | miRNA | miR-140 |
| t0062621 | 22 | 1 TACCACATGGTAGAACAACGGA     | miRNA | miR-140 |
| t0062644 | 22 | 1 ACCACAGGGTACAACCACGGCC     | miRNA | miR-140 |
| t0062676 | 23 | 1 CACCACAGGGTAGAACCACGGCC    | miRNA | miR-140 |
| t0062783 | 23 | 1 ACCACAGGGTAGAACCACGGTT     | miRNA | miR-140 |
| t0062896 | 22 | 1 ATCACAGGGTAGAACCACGGAG     | miRNA | miR-140 |
| t0062930 | 24 | 1 TACCACAGGGTAAAACAACGGACA   | miRNA | miR-140 |
| t0063033 | 23 | 1 TACCAAAGGGTAGAACCAAGGAT    | miRNA | miR-140 |
| t0063128 | 23 | 1 ACCACAGGGTAGAACCACAGAAA    | miRNA | miR-140 |
| t0063286 | 24 | 1 TACTACAGGGTAGAACCACAGACA   | miRNA | miR-140 |
| t0063300 | 22 | 1 ACCACAGGGTAGAATTACGGAG     | miRNA | miR-140 |
| t0063528 | 23 | 1 TACTACAGGGTAGAACTACGGAA    | miRNA | miR-140 |
| t0063586 | 23 | 1 TACCACAGAGTAGAACCACGGAG    | miRNA | miR-140 |

|          |    |                             |       |         |
|----------|----|-----------------------------|-------|---------|
| t0063618 | 24 | 1 TACCACAGGGTAGAACCACGCAGT  | miRNA | miR-140 |
| t0063677 | 23 | 1 TACCACAGGGAAGAACCACAGAA   | miRNA | miR-140 |
| t0063794 | 22 | 1 ACCACAGAGAAGAACCACGGAA    | miRNA | miR-140 |
| t0063836 | 22 | 1 TACCGCAGGGTAGAACCCCGGA    | miRNA | miR-140 |
| t0064195 | 22 | 1 TACCACAAGGTAGAACCACGGT    | miRNA | miR-140 |
| t0064288 | 22 | 1 ACCACAGGGTACAAACACGGAC    | miRNA | miR-140 |
| t0064453 | 22 | 1 ACCACAGGGTAGAAACACGGCA    | miRNA | miR-140 |
| t0064477 | 23 | 1 ACCACGGGGTAGAACCACGGAAG   | miRNA | miR-140 |
| t0064528 | 24 | 1 TACCACAGGGTAAAACCACGGACG  | miRNA | miR-140 |
| t0064711 | 24 | 1 TATCACAGGGTAGAACCACGGAAT  | miRNA | miR-140 |
| t0064766 | 23 | 1 TATCACAGGGTAGAACCCCGGAC   | miRNA | miR-140 |
| t0064784 | 25 | 1 TACCACAGGGTAGAACCACGGCCAA | miRNA | miR-140 |
| t0064845 | 22 | 1 ACCACAGGGTAGAACCCCGGCC    | miRNA | miR-140 |
| t0064948 | 21 | 1 CCACAGGGTTGAACCACGGAT     | miRNA | miR-140 |
| t0065031 | 21 | 1 CCACAGGGTAGAACCAAGGAA     | miRNA | miR-140 |
| t0065058 | 24 | 1 TACCACAGGGTAGAACCACCGATA  | miRNA | miR-140 |
| t0065086 | 22 | 1 TACCACAGGGTAGAACCCCGGG    | miRNA | miR-140 |
| t0065156 | 24 | 1 TACCACGGGGTAGAACCACGGAAA  | miRNA | miR-140 |
| t0065340 | 23 | 1 TACCACAAGGTAGAACCACGGAG   | miRNA | miR-140 |
| t0065394 | 23 | 1 TACCACAAGGTAGAACCAAGGAA   | miRNA | miR-140 |
| t0065404 | 22 | 1 TGCCACAGCGTAGAACCACGGA    | miRNA | miR-140 |
| t0065498 | 23 | 1 TACCACAGGGTAGAACAAGGGAT   | miRNA | miR-140 |
| t0065526 | 21 | 1 ACCACAGGGTAGAAACAAGGA     | miRNA | miR-140 |
| t0065552 | 24 | 1 ACCACAGGGTAGAACCATGGAATC  | miRNA | miR-140 |
| t0065768 | 22 | 1 ACCACAGGGCAGAATCACGGAT    | miRNA | miR-140 |
| t0065775 | 23 | 1 TACCACAGGGTAGAACTACGGCG   | miRNA | miR-140 |
| t0065861 | 23 | 1 ACCACAGGGTAGAACCAGGGACG   | miRNA | miR-140 |
| t0065969 | 23 | 1 TACCACAGGGTACAACCACGGAG   | miRNA | miR-140 |
| t0066102 | 24 | 1 TACCACAGGGGAGAACCACGGAGA  | miRNA | miR-140 |
| t0066163 | 22 | 1 TGCCACAGGGTAGAACTACGGA    | miRNA | miR-140 |
| t0066301 | 24 | 1 TACCACAGGGTAGAACCACGGCTC  | miRNA | miR-140 |
| t0066360 | 23 | 1 ACCACAGGGGAGAACCACGGAAT   | miRNA | miR-140 |
| t0066537 | 24 | 1 TACGACAGGGTAGAACCACGGACG  | miRNA | miR-140 |
| t0066552 | 25 | 1 TACCACAGGGTAGAAACACGGACAA | miRNA | miR-140 |
| t0066576 | 23 | 1 TACCACAGGGTATAAGCACGGAA   | miRNA | miR-140 |
| t0066609 | 20 | 1 CCACAGGGTAGAACCTCGGA      | miRNA | miR-140 |
| t0066679 | 21 | 1 TAGCACAGGGTAGAACCACGG     | miRNA | miR-140 |
| t0066702 | 21 | 1 ACCACAGGGTTGAACAACGGA     | miRNA | miR-140 |
| t0066773 | 22 | 1 ACCAGAGGGTAGAACCACGGAA    | miRNA | miR-140 |
| t0066801 | 23 | 1 TACAACAGGGTAGAACCAAGGAC   | miRNA | miR-140 |
| t0066817 | 22 | 1 TACCACAGGGGAGAACCACGGG    | miRNA | miR-140 |
| t0066898 | 22 | 1 TACCACAAGGTAGAACTACGGA    | miRNA | miR-140 |
| t0066901 | 24 | 1 TACCACAGGGGAGAACCAAGGACA  | miRNA | miR-140 |
| t0066910 | 21 | 1 ACCATAGGGTAGAACCACGGG     | miRNA | miR-140 |
| t0066965 | 23 | 1 TACCACAGGGTAGATCTACGGAA   | miRNA | miR-140 |
| t0067043 | 24 | 1 TACCACAGGGTAGAACCGCGGACG  | miRNA | miR-140 |
| t0067152 | 23 | 1 CTACCACAGGGTAGAACAACGGA   | miRNA | miR-140 |
| t0067299 | 21 | 1 ACCACAGGGTAGAACAAGGGA     | miRNA | miR-140 |
| t0067317 | 23 | 1 ACCTCAGGGTAGAACCACGGACA   | miRNA | miR-140 |
| t0067342 | 22 | 1 ACCACAGGGTTGAACCACGGAT    | miRNA | miR-140 |
| t0067449 | 23 | 1 TACCCAAGGGTAGAACCACGGAC   | miRNA | miR-140 |
| t0067495 | 23 | 1 ACCACAGGGTAGAACCGCGGACG   | miRNA | miR-140 |
| t0067542 | 20 | 1 CAACAGGGTAGAACAACGGA      | miRNA | miR-140 |
| t0067550 | 23 | 1 ACAACAGGGTAGAACCACGGATG   | miRNA | miR-140 |
| t0067569 | 23 | 1 TACCACAGGGTAGAACCCCGGGC   | miRNA | miR-140 |
| t0067615 | 24 | 1 TACCATAGGGTAGAACCACAGACA  | miRNA | miR-140 |
| t0067642 | 23 | 1 TACCACAGGGGAGAACCCCGGAA   | miRNA | miR-140 |
| t0067657 | 22 | 1 ACCACTGGGTAGAACCACGGAG    | miRNA | miR-140 |

|          |    |                              |       |         |
|----------|----|------------------------------|-------|---------|
| t0067884 | 23 | 1 TCCCACAGGGTAGAACCATGGAC    | miRNA | miR-140 |
| t0067942 | 21 | 1 ACCACAGGGAAGAACCATGGA      | miRNA | miR-140 |
| t0068029 | 24 | 1 TACCACGGGGTAGAACCCCGGACA   | miRNA | miR-140 |
| t0068112 | 22 | 1 TACAACAGGGAAGAACCACGGA     | miRNA | miR-140 |
| t0068304 | 22 | 1 ACCAAAGGGTAGAACAACGGAC     | miRNA | miR-140 |
| t0068312 | 25 | 1 ACCACAAGGTAGAACCACGGACAGA  | miRNA | miR-140 |
| t0068425 | 21 | 1 CCACAGGGTAGAACAACGGAC      | miRNA | miR-140 |
| t0068584 | 24 | 1 TACCACAGGGTGAACACCGGAAA    | miRNA | miR-140 |
| t0068621 | 23 | 1 ACCACAGGGTAGAACCACGGCGA    | miRNA | miR-140 |
| t0068635 | 24 | 1 TACCACAGGGTAGAAACCCCGGACA  | miRNA | miR-140 |
| t0068827 | 23 | 1 TACCACAGGGTAGAACCACTGAT    | miRNA | miR-140 |
| t0068898 | 23 | 1 ACCACAGGTTAGAACCACGGACA    | miRNA | miR-140 |
| t0069015 | 22 | 1 AACACAGGGTAGAACCACGGAG     | miRNA | miR-140 |
| t0069024 | 23 | 1 TACCACAGGGTAGAACCCCGAA     | miRNA | miR-140 |
| t0069056 | 23 | 1 TACCACAGGGGAGAATCACGGAA    | miRNA | miR-140 |
| t0069066 | 20 | 1 TACCACAGGGTAGAACCCCG       | miRNA | miR-140 |
| t0069160 | 24 | 1 ATCACAGGGTAGAACCACGGATAA   | miRNA | miR-140 |
| t0069247 | 23 | 1 TACCACGGGTAGAACCACGGCA     | miRNA | miR-140 |
| t0069433 | 24 | 1 TACCACAGGGTAGAAGCACGGACA   | miRNA | miR-140 |
| t0069434 | 21 | 1 CTACAGGGTAGAACCACGGAC      | miRNA | miR-140 |
| t0069479 | 21 | 1 ACCACAGGGGATAACCACGGGA     | miRNA | miR-140 |
| t0069496 | 23 | 1 TACCACAGGGTAGAAAAACGGAC    | miRNA | miR-140 |
| t0069565 | 22 | 1 ACCACAGGGGAGAACAACGGAA     | miRNA | miR-140 |
| t0069601 | 24 | 1 TACTACAGGGTAGAACCACGGATA   | miRNA | miR-140 |
| t0069613 | 23 | 1 TACCACATGGTAGAACCACGGCT    | miRNA | miR-140 |
| t0069724 | 22 | 1 TACTACAGGGTAGAAACACGGGA    | miRNA | miR-140 |
| t0069813 | 24 | 1 ACCACAGGGGAGAACCACGGGAATC  | miRNA | miR-140 |
| t0070199 | 23 | 1 TACCACAGGGAAGAACAACGGAA    | miRNA | miR-140 |
| t0070234 | 24 | 1 TACCAAAGGGTAGAACCACAGACA   | miRNA | miR-140 |
| t0070367 | 26 | 1 ACCACAGGGTAGAACCACGGACGGGG | miRNA | miR-140 |
| t0070389 | 23 | 1 TACCACAGGGTAGAACCCCGAC     | miRNA | miR-140 |
| t0070407 | 23 | 1 TACCACAGGATAGAACCAAGGAC    | miRNA | miR-140 |
| t0070543 | 22 | 1 ACCACAGGGTAGAACAACGGAG     | miRNA | miR-140 |
| t0070594 | 21 | 1 ACCACAGGGGAGAACAACGGGA     | miRNA | miR-140 |
| t0070692 | 24 | 1 TACCACAGGGTCGAACCACGGGAAG  | miRNA | miR-140 |
| t0070765 | 22 | 1 ACCACAGGGTAGAATCAAGGAC     | miRNA | miR-140 |
| t0070785 | 23 | 1 ACCACAGGGAAGAACCACGGACG    | miRNA | miR-140 |
| t0070824 | 24 | 1 GACCACAGGGTAGAACCACGGACG   | miRNA | miR-140 |
| t0070874 | 22 | 1 TACCACAGGGTAGAACTACGGG     | miRNA | miR-140 |
| t0070940 | 22 | 1 TACCACAGGGTAGCACCACGGC     | miRNA | miR-140 |
| t0070947 | 24 | 1 ACCACAGGGTAAAACCACGGACAA   | miRNA | miR-140 |
| t0071006 | 24 | 1 TACCACAGGGGAGAACCACGGAGT   | miRNA | miR-140 |
| t0071085 | 21 | 1 TCACAGGGTAGAACCACGGAT      | miRNA | miR-140 |
| t0071114 | 21 | 1 TACTACAGGGTAGAACCACGG      | miRNA | miR-140 |
| t0071141 | 23 | 1 TACCACAGGGTAGAACCACGCAT    | miRNA | miR-140 |
| t0071164 | 20 | 1 TACCACAGGGTAGGACCACG       | miRNA | miR-140 |
| t0071187 | 24 | 1 TACCACAGGGTAGGACCACGGACG   | miRNA | miR-140 |
| t0071243 | 22 | 1 ACCACAGGGTAGAACTACGGTT     | miRNA | miR-140 |
| t0071266 | 22 | 1 TACCAGAGGGTATAACCACGGGA    | miRNA | miR-140 |
| t0071268 | 23 | 1 TACAACAGGGTAGAACCATGGAC    | miRNA | miR-140 |
| t0071279 | 21 | 1 ACCACAGGGTAGAACCACAGC      | miRNA | miR-140 |
| t0071301 | 23 | 1 TACCAAAGGGTAGAACAACGGAC    | miRNA | miR-140 |
| t0071302 | 22 | 1 TAACAAAGGGTAGAACCACGGGA    | miRNA | miR-140 |
| t0071361 | 22 | 1 CCACAGGGAAGAACCACGGACT     | miRNA | miR-140 |
| t0071414 | 22 | 1 ACCACAGGGTAGAACCACGTAA     | miRNA | miR-140 |
| t0071491 | 21 | 1 ACCACAAGGTAGAACTACGGGA     | miRNA | miR-140 |
| t0071842 | 23 | 1 ACCACAGGGGAGAACCACGGATG    | miRNA | miR-140 |
| t0071848 | 23 | 1 ACCACAGGGTAGAACAACGGATA    | miRNA | miR-140 |

|          |    |                              |       |         |
|----------|----|------------------------------|-------|---------|
| t0071861 | 20 | 1 TCACAGGGGAGAACCACGGA       | miRNA | miR-140 |
| t0071928 | 24 | 1 TACCACAGGGTAGAACAACGGAAT   | miRNA | miR-140 |
| t0072004 | 22 | 1 ACCACAGGGTAGAACCACGCAT     | miRNA | miR-140 |
| t0072131 | 22 | 1 TACCACTGGGTAGAACTACGGA     | miRNA | miR-140 |
| t0072172 | 24 | 1 TACCATAGGGTAGAACCACGGAAT   | miRNA | miR-140 |
| t0072255 | 19 | 1 CACAGAGTAGAACCACGGA        | miRNA | miR-140 |
| t0072268 | 22 | 1 ACCACAGGGTAGAGCTACGGAT     | miRNA | miR-140 |
| t0072412 | 21 | 1 TTCACAGGGTAGAACCACGGA      | miRNA | miR-140 |
| t0072509 | 21 | 1 ACCACAGAGTAGAACAACGGA      | miRNA | miR-140 |
| t0072570 | 20 | 1 ACCACAGGTTAGAACCACGG       | miRNA | miR-140 |
| t0072730 | 23 | 1 TACCAGAGGGTAGAACCACGGAT    | miRNA | miR-140 |
| t0072741 | 23 | 1 AACACAGGGTAGAAACACGGACA    | miRNA | miR-140 |
| t0072762 | 21 | 1 ACCACAGGGTAGATCAACGGA      | miRNA | miR-140 |
| t0072826 | 23 | 1 ACCACAGGGAAGAACCACGGATT    | miRNA | miR-140 |
| t0072878 | 21 | 1 ACCACAGTGTAGAGCCACGGA      | miRNA | miR-140 |
| t0073038 | 21 | 1 ACCACGGGGTAGAACTACGGA      | miRNA | miR-140 |
| t0073208 | 23 | 1 TACCGCAGGGTAGAAACACGGAC    | miRNA | miR-140 |
| t0073236 | 22 | 1 AGAACAGGGTAGAACCACGGAT     | miRNA | miR-140 |
| t0073335 | 22 | 1 ACCACAGGGGAGAACTACGGAA     | miRNA | miR-140 |
| t0073439 | 23 | 1 TACCACAGGGTAGAACCAGGAAA    | miRNA | miR-140 |
| t0073495 | 23 | 1 CACCACAGGGTAGAATCACGGAC    | miRNA | miR-140 |
| t0073872 | 23 | 1 TACCACAGAGTAGAACCTCGGAT    | miRNA | miR-140 |
| t0073925 | 23 | 1 ACCAGAGGGTAGAACCACGGACT    | miRNA | miR-140 |
| t0073951 | 23 | 1 TACCATAGGGTAGAACAACGGAA    | miRNA | miR-140 |
| t0073956 | 21 | 1 ATCACATGGTAGAACCACGGA      | miRNA | miR-140 |
| t0073967 | 21 | 1 ACAAAGGGTAGAACCACGGA       | miRNA | miR-140 |
| t0074008 | 22 | 1 TACCACACGGTACAACCACGGA     | miRNA | miR-140 |
| t0074016 | 22 | 1 ACCACAGGGTGAACCACGGAG      | miRNA | miR-140 |
| t0074063 | 22 | 1 TACCACAAGGTAGAACCACGGA     | miRNA | miR-140 |
| t0074159 | 23 | 1 ACCACAAGGTAGAACCACGGACT    | miRNA | miR-140 |
| t0074171 | 24 | 1 TACCACAGGGCAGAACCACGGATC   | miRNA | miR-140 |
| t0074526 | 23 | 1 ACCACAGGGTAGAACCTCGGACA    | miRNA | miR-140 |
| t0074568 | 23 | 1 TACCACAGGGGAGAACAACGGAC    | miRNA | miR-140 |
| t0074656 | 23 | 1 TAACACAGGGTAGAACCAAGGAC    | miRNA | miR-140 |
| t0074662 | 24 | 1 TACCACAGGGTAGAACCGCGGACT   | miRNA | miR-140 |
| t0074788 | 24 | 1 TACCACAGGGTAGAGCCACGGAAA   | miRNA | miR-140 |
| t0074792 | 20 | 1 CCACAGGGTAGAACTACGGC       | miRNA | miR-140 |
| t0074839 | 24 | 1 TAACACAGGGTAGAACCACGGAAA   | miRNA | miR-140 |
| t0074944 | 22 | 1 ACCACAGGGTAGAACTAAGGAC     | miRNA | miR-140 |
| t0075085 | 22 | 1 ACCAAAGGGTAGAATCACGGAC     | miRNA | miR-140 |
| t0075131 | 24 | 1 TACCAGAGGGTAGAACCACGGATA   | miRNA | miR-140 |
| t0075281 | 23 | 1 TACCAGAGGGTAGAACCCCGGAC    | miRNA | miR-140 |
| t0075302 | 26 | 1 ACCACAGGGTAGAACCACGGAAAAGA | miRNA | miR-140 |
| t0075450 | 22 | 1 ACCACAGGGTAGAACAAAGGAT     | miRNA | miR-140 |
| t0075487 | 20 | 1 CCACAGGGGAGAACCACGGT       | miRNA | miR-140 |
| t0075509 | 21 | 1 CCCCCAGGGTAGAACCACGGA      | miRNA | miR-140 |
| t0075522 | 24 | 1 CACCACAGGGTAGAACCACGGAAG   | miRNA | miR-140 |
| t0075525 | 24 | 1 GCCACAGGGTAGAACACGGACAA    | miRNA | miR-140 |
| t0075585 | 22 | 1 TACCACAGCGTAGAACCAAGGA     | miRNA | miR-140 |
| t0075632 | 22 | 1 TACCACAGGGTAGAATCAAGGA     | miRNA | miR-140 |
| t0075633 | 22 | 1 TACCACAAGGTAGAACCACGGGA    | miRNA | miR-140 |
| t0075762 | 23 | 1 ACCAGAGGGTAGAACACGGACA     | miRNA | miR-140 |
| t0075772 | 22 | 1 ACCACAGGGTAGCACCACGGAT     | miRNA | miR-140 |
| t0075878 | 23 | 1 ACCACAGGGGAGAACCACGGAAA    | miRNA | miR-140 |
| t0075879 | 21 | 1 ACCACAGGGTAGCAACACGGA      | miRNA | miR-140 |
| t0075944 | 23 | 1 TACCACAGGGTCGAACAACGGAC    | miRNA | miR-140 |
| t0075998 | 25 | 1 ACCACAGGGTAGAAACACGGACATC  | miRNA | miR-140 |
| t0076007 | 22 | 1 TACCACAGGGTAGAACACACA      | miRNA | miR-140 |



|          |    |                            |       |         |
|----------|----|----------------------------|-------|---------|
| t0076098 | 23 | 1 ACCACAGGGAAGAACTACGGACA  | miRNA | miR-140 |
| t0076354 | 22 | 1 TGCCACAGTGTAGAACCACGGA   | miRNA | miR-140 |
| t0076494 | 22 | 1 TACCACAGTGTAGAACTACGGA   | miRNA | miR-140 |
| t0076600 | 22 | 1 TATCACAGGGTAGAAACACGGA   | miRNA | miR-140 |
| t0076608 | 21 | 1 ACCACAGGGTAGAACAACGGG    | miRNA | miR-140 |
| t0076681 | 22 | 1 ACCACAGGGTAGAAACACGGGC   | miRNA | miR-140 |
| t0076739 | 22 | 1 TACCACGGGGGAGAACCACGGA   | miRNA | miR-140 |
| t0076914 | 24 | 1 TACCACAGGCTAGAACCACGGACA | miRNA | miR-140 |
| t0076943 | 23 | 1 ACCACAGGGGAGAACCACGGACT  | miRNA | miR-140 |
| t0077085 | 22 | 1 ACAAAGGGTAGAACCACGGAT    | miRNA | miR-140 |
| t0077143 | 23 | 1 TACCACAGGGTAGAAACAGGGAC  | miRNA | miR-140 |
| t0077168 | 23 | 1 ACTACAGGGTAGAACCACGGACT  | miRNA | miR-140 |
| t0077246 | 24 | 1 TACCACAGGGTAGTACCACGGAAA | miRNA | miR-140 |
| t0077262 | 22 | 1 ACCAAAGGGTAGAACAACGGAA   | miRNA | miR-140 |
| t0077310 | 21 | 1 TACCACAAGGTAGAACCACGG    | miRNA | miR-140 |
| t0077418 | 20 | 1 AACACAGGGTAGAACCACGG     | miRNA | miR-140 |
| t0077649 | 23 | 1 TACCACAAGGTAGAACCACGGAC  | miRNA | miR-140 |
| t0077671 | 22 | 1 ACCACAGGGTCGAACCACGGAT   | miRNA | miR-140 |
| t0077715 | 20 | 1 CCGCAGGGTAGAACCACGGA     | miRNA | miR-140 |
| t0077894 | 22 | 1 CACCACAGGGTAGAACCACGGT   | miRNA | miR-140 |
| t0078029 | 21 | 1 CCACAGGGTAGGACCACGGAC    | miRNA | miR-140 |
| t0078088 | 23 | 1 ACCACAGGGTAGAACCAGGGACA  | miRNA | miR-140 |
| t0078164 | 22 | 1 ACCACAGGTTAGAACCACGGAT   | miRNA | miR-140 |
| t0078171 | 23 | 1 TACCACACGGTAGAACCACGGAG  | miRNA | miR-140 |
| t0078177 | 21 | 1 ATCACAGGGTAGAACCAAGGA    | miRNA | miR-140 |
| t0078355 | 23 | 1 TACCACATGGTAGAACCCCGGAC  | miRNA | miR-140 |
| t0078607 | 23 | 1 TACCGCAGGGTAGAACCCCGGAC  | miRNA | miR-140 |
| t0078642 | 23 | 1 ACCACAGGGTAGAACCGCGGATT  | miRNA | miR-140 |
| t0078767 | 23 | 1 TACCACAGGGTAGATCCCCGGAA  | miRNA | miR-140 |
| t0078874 | 23 | 1 ACCACAGGGTAGAATCACGGCCA  | miRNA | miR-140 |
| t0078991 | 22 | 1 TACCACCGGGTAGAAACACGGA   | miRNA | miR-140 |
| t0079083 | 23 | 1 ACCACAGGGTCGAACCACGGACG  | miRNA | miR-140 |
| t0079111 | 20 | 1 ACCAAAGGGTAGAACCACGG     | miRNA | miR-140 |
| t0079168 | 22 | 1 TAACACAGGGAAGAACCACGGA   | miRNA | miR-140 |
| t0079208 | 23 | 1 TACCACAGGGAAGAACCAAGGAC  | miRNA | miR-140 |
| t0079209 | 22 | 1 CCACAGGGTAGAACCACAGACA   | miRNA | miR-140 |
| t0079240 | 21 | 1 ACCACATGGTAGAACCACGGC    | miRNA | miR-140 |
| t0079275 | 23 | 1 TACCACAGGGGAGAACCACTGAA  | miRNA | miR-140 |
| t0079339 | 24 | 1 AACAAAGGGTAGAACCACGGACG  | miRNA | miR-140 |
| t0079439 | 24 | 1 TACAACAGGGTAGAACCAAGGAAG | miRNA | miR-140 |
| t0079471 | 22 | 1 ACCACAGGGTAGAACTACGGCC   | miRNA | miR-140 |
| t0079688 | 22 | 1 TACCACAGCGTAGAACGACGGA   | miRNA | miR-140 |
| t0079697 | 23 | 1 TACCACAAGGGAGAACCACGGAC  | miRNA | miR-140 |
| t0079790 | 22 | 1 TACCACAGTGTAGAACCAAGGA   | miRNA | miR-140 |
| t0079794 | 22 | 1 TACCACAGGGTTGAACCACGGC   | miRNA | miR-140 |
| t0079838 | 22 | 1 TACCGCAGGGTAGAACCACGGT   | miRNA | miR-140 |
| t0079868 | 21 | 1 CCAAAGGGTAGAACCACGGAT    | miRNA | miR-140 |
| t0079877 | 20 | 1 ACCACAGGGTAAAACCACGG     | miRNA | miR-140 |
| t0080074 | 23 | 1 TACCACAGGGGATAACCACGGAA  | miRNA | miR-140 |
| t0080176 | 21 | 1 ACCACAGTTTAGAACCACGGA    | miRNA | miR-140 |
| t0080214 | 22 | 1 ACCACAGGGTAGGATCACGGAA   | miRNA | miR-140 |
| t0080276 | 23 | 1 ACCACAGGGTAAAACCACGGACG  | miRNA | miR-140 |
| t0080279 | 23 | 1 ACAACAGGGGAGAACCACGGGAAG | miRNA | miR-140 |
| t0080313 | 22 | 1 TACCACAGGGTAGAACCCAGA    | miRNA | miR-140 |
| t0080400 | 23 | 1 TACCACGGGGTAGAACCAACGGAC | miRNA | miR-140 |
| t0080465 | 20 | 1 TCACAGGGTAGAACCAAGGA     | miRNA | miR-140 |
| t0080546 | 23 | 1 TAACACAGGGTAGAACCAAGGAA  | miRNA | miR-140 |
| t0080564 | 20 | 1 ACCACAGGGTAGAAAAACGG     | miRNA | miR-140 |

|          |    |                                |       |         |
|----------|----|--------------------------------|-------|---------|
| t0080802 | 22 | 1 TACCACAGGGGTAGAATCACGGG      | miRNA | miR-140 |
| t0081039 | 21 | 1 ACCACAGGGGAGAAACACGGA        | miRNA | miR-140 |
| t0081055 | 24 | 1 TACCACGGGGTAGAACCACGGATA     | miRNA | miR-140 |
| t0081202 | 22 | 1 ATCACAGGGGTAGAACCACAGAA      | miRNA | miR-140 |
| t0081291 | 20 | 1 ACTACAGGGGTAGAACCACGG        | miRNA | miR-140 |
| t0081316 | 22 | 1 ACTACAGGGGTAGAACTACGGAT      | miRNA | miR-140 |
| t0081451 | 22 | 1 TACCACGGGGTAGAACCCCGGA       | miRNA | miR-140 |
| t0081526 | 22 | 1 ACCACAGGGGTAGAACAACGGCT      | miRNA | miR-140 |
| t0081585 | 22 | 1 ACCACAGGGGTAGAACTATGGAA      | miRNA | miR-140 |
| t0081591 | 21 | 1 ACCAAAGGGGTAGAACTACGGA       | miRNA | miR-140 |
| t0081604 | 21 | 1 ACCACAGGGCAGATCCACGGA        | miRNA | miR-140 |
| t0081648 | 22 | 1 TACCACAGGGGTAGAACAAGGGA      | miRNA | miR-140 |
| t0081820 | 22 | 1 ACCACAGGGGTATAACCACGGCC      | miRNA | miR-140 |
| t0081832 | 24 | 1 TACCACAGGGGAGAAACACGGAGA     | miRNA | miR-140 |
| t0081940 | 23 | 1 TATCACAGGGGTAGAACCACGGCA     | miRNA | miR-140 |
| t0081971 | 24 | 1 TACCGCAGGGGTAGAATCACGGACA    | miRNA | miR-140 |
| t0082065 | 22 | 1 TACCACAGGGGTAGAACAACGGC      | miRNA | miR-140 |
| t0082195 | 24 | 1 CACCACAGGGGTACAACCACGGACG    | miRNA | miR-140 |
| t0082225 | 23 | 1 TACCACAGGGGTAGAACTAAGGAA     | miRNA | miR-140 |
| t0082367 | 21 | 1 ACCACAAGGTAGAATCACGGA        | miRNA | miR-140 |
| t0082439 | 23 | 1 TACCACATGGCAGAACCACGGAC      | miRNA | miR-140 |
| t0082483 | 20 | 1 ACCACAGGGGTAGAACCACGC        | miRNA | miR-140 |
| t0082527 | 24 | 1 TACCACAGAGTAGAACCACGGTCA     | miRNA | miR-140 |
| t0082556 | 25 | 1 TACCACAGGGGTAGAACCACGGGAAA   | miRNA | miR-140 |
| t0082563 | 22 | 1 GCAACAGGGGTAGAACCACGGAT      | miRNA | miR-140 |
| t0082642 | 23 | 1 TACCACAGGATAGAACCCCGGAA      | miRNA | miR-140 |
| t0082654 | 22 | 1 TACCACAGGGGTAGAATCACTGA      | miRNA | miR-140 |
| t0082820 | 22 | 1 TATCACAGGGGAGAACCACGGA       | miRNA | miR-140 |
| t0082960 | 24 | 1 TACCACAGGGGTAGAACCCCGGACC    | miRNA | miR-140 |
| t0083037 | 22 | 1 ACCACAGGGGTAGAACTACGGCA      | miRNA | miR-140 |
| t0083084 | 22 | 1 ACCACATGGTAGAACCACGGAC       | miRNA | miR-140 |
| t0083089 | 23 | 1 ACCACAGGGGTAGAACCTCGGAAA     | miRNA | miR-140 |
| t0083156 | 23 | 1 TACCACAGAGTATAACCACGGAA      | miRNA | miR-140 |
| t0083193 | 22 | 1 TACCACAGGGTAAACTACGGA        | miRNA | miR-140 |
| t0083322 | 22 | 1 TACCACAGGGGTAGAACCCTGGA      | miRNA | miR-140 |
| t0083432 | 21 | 1 ACCACAGTGTAGAACCACGGT        | miRNA | miR-140 |
| t0083506 | 22 | 1 ACCACAGGGGTAGAAAAACGGAA      | miRNA | miR-140 |
| t0083519 | 23 | 1 TACCACAGGGGTAGAACCCTGGAA     | miRNA | miR-140 |
| t0083591 | 23 | 1 ACCACAGGGGTAGAACCACGGCAT     | miRNA | miR-140 |
| t0083605 | 23 | 1 TATCACAGGGGTAGAACCACGGAG     | miRNA | miR-140 |
| t0083856 | 26 | 1 ACCACAGGGGTAGAACCACGGCCGGAT  | miRNA | miR-140 |
| t0083918 | 21 | 1 ACCACGGGGGTAGAACCACTGA       | miRNA | miR-140 |
| t0083938 | 22 | 1 AACACAGGGGTAGAACCAGGGAT      | miRNA | miR-140 |
| t0083939 | 24 | 1 TACCATAGGGGTAGAACAACGGACA    | miRNA | miR-140 |
| t0084053 | 20 | 1 CCCACAGGGGTAGAACCACGG        | miRNA | miR-140 |
| t0084083 | 27 | 1 ACCACAGGGGTAGAACCCCGGACACCGG | miRNA | miR-140 |
| t0084087 | 24 | 1 TACCACAGGGGTAGAATCACGGCCA    | miRNA | miR-140 |
| t0084304 | 22 | 1 ACCACCGGGGTAGAACCACGGAG      | miRNA | miR-140 |
| t0084372 | 24 | 1 TACCCACAGGGGTAGAACCACGGAAA   | miRNA | miR-140 |
| t0084413 | 23 | 1 ACCACAGGGGTAGATCCACGGACA     | miRNA | miR-140 |
| t0084427 | 21 | 1 ACAACAGGGGAGAAACCACGGA       | miRNA | miR-140 |
| t0084569 | 22 | 1 ACCACAGGGGTAGAGCTACGGAA      | miRNA | miR-140 |
| t0084583 | 23 | 1 GACCACAGGGGTAGAACCACGGAT     | miRNA | miR-140 |
| t0084658 | 24 | 1 TACCACAGGGCAGAACTACGGACA     | miRNA | miR-140 |
| t0084864 | 23 | 1 TCCCACAGGGGTAGAACCACGGAC     | miRNA | miR-140 |
| t0085073 | 21 | 1 ACCATAGGGGTAGAACCACGGC       | miRNA | miR-140 |
| t0085136 | 22 | 1 TACCACAGGGGTAGACCCACGGC      | miRNA | miR-140 |
| t0085146 | 20 | 1 CCCCAGGGGTAGAACCACGGA        | miRNA | miR-140 |

|          |    |                             |       |         |
|----------|----|-----------------------------|-------|---------|
| t0085331 | 24 | 1 TACCAGAGGGTAGTACCACGGACA  | miRNA | miR-140 |
| t0085373 | 23 | 1 TACCACGGGGTAGAACCACGGAG   | miRNA | miR-140 |
| t0085384 | 22 | 1 ACCACAGGGTAGAAAAACGGAT    | miRNA | miR-140 |
| t0085419 | 24 | 1 TACCACAGTGTAGAACCACGGAAA  | miRNA | miR-140 |
| t0085550 | 22 | 1 AGCACAGGGTAGAACCACGGAT    | miRNA | miR-140 |
| t0085585 | 24 | 1 TACAACAGGGTAGAACCACGGAAA  | miRNA | miR-140 |
| t0085725 | 24 | 1 TACCACAGGGTAGAACCACAGAAT  | miRNA | miR-140 |
| t0085785 | 22 | 1 CCACAGGGTAGAACCACGGCCT    | miRNA | miR-140 |
| t0085892 | 24 | 1 TACCCACAGGGTAGAACCACGGAAT | miRNA | miR-140 |
| t0085895 | 24 | 1 TACCACAGGGTAGAACCACGGAGT  | miRNA | miR-140 |
| t0085904 | 20 | 1 ACACAGGGTAGAACCACGGGA     | miRNA | miR-140 |
| t0085914 | 22 | 1 TACCACAGGGTAGAACCACGGCA   | miRNA | miR-140 |
| t0085915 | 23 | 1 TACCACAGGGTAGAAAGACGGAC   | miRNA | miR-140 |
| t0085958 | 20 | 1 CCACAGGGTGAACCACGGGA      | miRNA | miR-140 |
| t0086003 | 22 | 1 TACCACAGGGTAGGATCACGGGA   | miRNA | miR-140 |
| t0086026 | 21 | 1 TACCACAGGGTAGAACCACGCG    | miRNA | miR-140 |
| t0086044 | 24 | 1 TACCACAGAGTAGAACCACGGAAA  | miRNA | miR-140 |
| t0086182 | 21 | 1 ATCACAGGGTAGAACCACGGG     | miRNA | miR-140 |
| t0086190 | 21 | 1 ACCTCAGGGGAGAACCACGGGA    | miRNA | miR-140 |
| t0086213 | 24 | 1 TACCATAGGGTAGAACCACGGACT  | miRNA | miR-140 |
| t0086251 | 24 | 1 TACCATAGGGTAGAACCACGGATA  | miRNA | miR-140 |
| t0086312 | 20 | 1 CCACAGGGTAGAACCACGGGA     | miRNA | miR-140 |
| t0086327 | 23 | 1 TACCACAGGGTAGAACTAAGGAC   | miRNA | miR-140 |
| t0086487 | 21 | 1 ACCACAGGGTAGAACCACGGCG    | miRNA | miR-140 |
| t0086584 | 24 | 1 TACCACAGGGTAGAACCACGGGCT  | miRNA | miR-140 |
| t0086695 | 21 | 1 CCACAGGGTAAAACCACGGAT     | miRNA | miR-140 |
| t0086704 | 23 | 1 TACCACAGGCTAGAACCAAGGAA   | miRNA | miR-140 |
| t0086938 | 23 | 1 ACCACAGGGTAGACCCACGGACA   | miRNA | miR-140 |
| t0087036 | 23 | 1 ACCACAGGGGAGAACCACGGACA   | miRNA | miR-140 |
| t0087105 | 23 | 1 TACCACAGCGTAGAACCACGGAT   | miRNA | miR-140 |
| t0087119 | 22 | 1 ACCACAGGGTAGAACGACGGAC    | miRNA | miR-140 |
| t0087125 | 21 | 1 ACCACAGGGTAAAACACTACGGA   | miRNA | miR-140 |
| t0087203 | 21 | 1 ACCACAGGGTAGACCCACGGGA    | miRNA | miR-140 |
| t0087241 | 22 | 1 TACCACAGGCTAGAACCACGGG    | miRNA | miR-140 |
| t0087255 | 22 | 1 TACCACTGGGTAGAACAACGGGA   | miRNA | miR-140 |
| t0087316 | 23 | 1 ACCGCAGGGTAGAACCACGGACA   | miRNA | miR-140 |
| t0087431 | 21 | 1 ACCACAGGGTATAACCACCGA     | miRNA | miR-140 |
| t0087504 | 23 | 1 TACCACAGGGTAGAACCACGGGG   | miRNA | miR-140 |
| t0087604 | 22 | 1 TACCACAGGGAAGAAACACGGGA   | miRNA | miR-140 |
| t0087633 | 24 | 1 AACCAGAGGGTAGAACCACGGACA  | miRNA | miR-140 |
| t0087780 | 22 | 1 ACTACAGGGTATAACCACGGAC    | miRNA | miR-140 |
| t0087855 | 22 | 1 TACCACAGTGTAGAACAACGGGA   | miRNA | miR-140 |
| t0087899 | 22 | 1 ACCACAGGGTAGAAATACGGAT    | miRNA | miR-140 |
| t0087924 | 22 | 1 TACCATAGCGTAGAACCACGGGA   | miRNA | miR-140 |
| t0087988 | 22 | 1 TACCACAGGGTAGACCCACGGGA   | miRNA | miR-140 |
| t0088082 | 24 | 1 TACCACAGGATAGAACCACGGAAA  | miRNA | miR-140 |
| t0088284 | 22 | 1 TACCACAGAGTAGAACCACGGC    | miRNA | miR-140 |
| t0088318 | 22 | 1 ACCACAGGGTAGAAACACGGCC    | miRNA | miR-140 |
| t0088367 | 24 | 1 TACCACAGGGTAGAACCACGGTCCG | miRNA | miR-140 |
| t0088371 | 21 | 1 ACAACAGTGTAGAACCACGGGA    | miRNA | miR-140 |
| t0088441 | 23 | 1 TACCACCGGGTAGAACCACGGAA   | miRNA | miR-140 |
| t0088494 | 23 | 1 CCCACAGGGTAGAACCACGGAC    | miRNA | miR-140 |
| t0088495 | 24 | 1 TACCACAGGGTAGAACCACGGGAAT | miRNA | miR-140 |
| t0088520 | 24 | 1 TACCACCGGGTAGAACCACGGACA  | miRNA | miR-140 |
| t0088572 | 23 | 1 TACCACAGGATAGAACTACGGAA   | miRNA | miR-140 |
| t0088608 | 21 | 1 ACCACAGGGTTAAACCACGGGA    | miRNA | miR-140 |
| t0088619 | 23 | 1 ACCATAGGGTAGAACCACGGACT   | miRNA | miR-140 |
| t0088687 | 24 | 1 ACCACAGGGTAGAACAACGGATGA  | miRNA | miR-140 |

|          |    |                              |       |          |
|----------|----|------------------------------|-------|----------|
| t0088702 | 23 | 1 TACCACAGGGTGAACCACGGAG     | miRNA | miR-140  |
| t0088937 | 23 | 1 AGCACAGGGTAGAACCACGGACA    | miRNA | miR-140  |
| t0088950 | 21 | 1 ACCACAGGGTGAACACTACGGA     | miRNA | miR-140  |
| t0088978 | 24 | 1 TACCACAGGGTAGAATCACGAACG   | miRNA | miR-140  |
| t0089004 | 23 | 1 ACCACAAGGTAGAACCACGGCAG    | miRNA | miR-140  |
| t0089150 | 21 | 1 ACCACGGCGTAGAACCACGGA      | miRNA | miR-140  |
| t0089151 | 23 | 1 TACCACAGGGTCGAACCACGGAG    | miRNA | miR-140  |
| t0089160 | 24 | 1 TTCCACAGGGTAGAACCACGGACA   | miRNA | miR-140  |
| t0089188 | 23 | 1 TACCACAGGGTAGAACTACGGTT    | miRNA | miR-140  |
| t0089244 | 23 | 1 TACCACAGGGTAGTACCCCGGAT    | miRNA | miR-140  |
| t0089249 | 23 | 1 ACCACAGGGTGAACCACGGAGA     | miRNA | miR-140  |
| t0089286 | 22 | 1 ACCACAGGGATGAACCACGGAA     | miRNA | miR-140  |
| t0089361 | 23 | 1 TACGACAGGGTAGAACCCCGGAC    | miRNA | miR-140  |
| t0089522 | 23 | 1 TACCAAAGGGTAGAACCAAGGAC    | miRNA | miR-140  |
| t0089582 | 24 | 1 CACCACAGGGTAGAACCACGGAAA   | miRNA | miR-140  |
| t0089622 | 24 | 1 ACCACAGGGTAGAACCAAGGAAGA   | miRNA | miR-140  |
| t0089662 | 21 | 1 ACCACAGGCTAGAATCACGGA      | miRNA | miR-140  |
| t0089679 | 23 | 1 TACCACAGGGCAGAACCAAGGAA    | miRNA | miR-140  |
| t0090076 | 23 | 1 ACCACGGGGTAGAACCACGCACA    | miRNA | miR-140  |
| t0090127 | 20 | 1 CCACAGCGTAGAACCACGGA       | miRNA | miR-140  |
| t0090330 | 21 | 1 ACCACAGGGTATACCCACGGA      | miRNA | miR-140  |
| t0090415 | 23 | 1 TACCACAGGGTAGAACTCCGGAC    | miRNA | miR-140  |
| t0090528 | 23 | 1 TACCACAGGGTAGAAGCCCGGAC    | miRNA | miR-140  |
| t0090552 | 22 | 1 ACCACAGGGTTGAACCGCGGAA     | miRNA | miR-140  |
| t0090617 | 23 | 1 TACCACAGGCTAGAACCACGGGC    | miRNA | miR-140  |
| t0090885 | 22 | 1 CCACAGGGTAGAAACACGGACA     | miRNA | miR-140  |
| t0090934 | 24 | 1 ACCACAGGGCAGAACCACGGAAGA   | miRNA | miR-140  |
| t0090975 | 23 | 1 TAACACAGGGTAGAACCACGGAG    | miRNA | miR-140  |
| t0091014 | 23 | 1 TACCACAAGGTAGAACCACGGCT    | miRNA | miR-140  |
| t0091084 | 23 | 1 TACCACAAGGTAGAACCCCGGAC    | miRNA | miR-140  |
| t0091426 | 22 | 1 ACCACAGGGCAGAACCACAGAC     | miRNA | miR-140  |
| t0091460 | 22 | 1 CCACAGGGTAGAATCACGGAAA     | miRNA | miR-140  |
| t0091467 | 21 | 1 ACAACAAGGTAGAACCACGGA      | miRNA | miR-140  |
| t0091637 | 21 | 1 ACCACAGGGTAGCACCACGGC      | miRNA | miR-140  |
| t0091686 | 22 | 1 ACCATAGGGTAGAATCACGGAC     | miRNA | miR-140  |
| t0091729 | 23 | 1 TACCACAGGGTAGTACCACGGAC    | miRNA | miR-140  |
| t0091761 | 23 | 1 TACCAAAGGGTAGAACCACGGAT    | miRNA | miR-140  |
| t0092103 | 21 | 1 TACCACAGGGTAGAACTACGA      | miRNA | miR-140  |
| t0092219 | 24 | 1 TACCACAGGGTAGGACCACGGACT   | miRNA | miR-140  |
| t0092257 | 21 | 1 ACCACAGGGTAGAATCACAGA      | miRNA | miR-140  |
| t0092304 | 24 | 1 TACCACAGAGTAGAACCACGGACG   | miRNA | miR-140  |
| t0092340 | 20 | 1 ACCACAGGGTAGAGCCACGG       | miRNA | miR-140  |
| t0092500 | 22 | 1 ACCACTGGGTAGAACCACGGAA     | miRNA | miR-140  |
| t0092537 | 22 | 1 ACCACAGGGTAGAACCATGGAG     | miRNA | miR-140  |
| t0092542 | 21 | 1 ACCACAGTGTAGAACCAAGGA      | miRNA | miR-140  |
| t0092553 | 23 | 1 ACCACTGGGTAGAACCACGGACA    | miRNA | miR-140  |
| t0092578 | 22 | 1 TACCACAGTGTAGAACCACGGT     | miRNA | miR-140  |
| t0092597 | 23 | 1 ACCACAGGGTTGAACCACGGACA    | miRNA | miR-140  |
| t0092614 | 23 | 1 ACCACAGGGTAGAACCACGAACA    | miRNA | miR-140  |
| t0092639 | 22 | 1 TACCACAGGGTAGAATAACGGA     | miRNA | miR-140  |
| t0092650 | 21 | 1 ACCAAAAGGTAGAACCACGGA      | miRNA | miR-140  |
| t0092693 | 22 | 1 TACCACACGGGAGAACCACGGA     | miRNA | miR-140  |
| t0092809 | 23 | 1 TACCACAGGGTAGAACCTCGGCT    | miRNA | miR-140  |
| t0092835 | 20 | 1 ACCACAGAGTAGAACCACGG       | miRNA | miR-140  |
| t0092871 | 24 | 1 CACCACAGGGTAGAACCCCGGACA   | miRNA | miR-140  |
| t0092914 | 26 | 1 TGGAATGTAAAGAAGTATGGACCATC | miRNA | miR-1-3p |
| t0092918 | 22 | 1 TGGAATGAAAAGAAGTATGGAG     | miRNA | miR-1-3p |
| t0092937 | 25 | 1 TGGAATGTAAAGAAGTATGGAGCTC  | miRNA | miR-1-3p |

|          |    |                             |       |          |
|----------|----|-----------------------------|-------|----------|
| t0092958 | 25 | 1 TGGAATGTAAAGAAGTATGGTGATC | miRNA | miR-1-3p |
| t0093040 | 22 | 1 TGGAATGGAAAGAAGTATGGAG    | miRNA | miR-1-3p |
| t0093067 | 21 | 1 TGGAGTGTAAAGAAGTATGGA     | miRNA | miR-1-3p |
| t0093088 | 21 | 1 TGGAATGTAGAGAAGTATGGA     | miRNA | miR-1-3p |
| t0093167 | 22 | 1 TGGAATGTAAAGAAGGATGGAG    | miRNA | miR-1-3p |
| t0093231 | 25 | 1 TGGAATGTAAAGAAGTATGGACATC | miRNA | miR-1-3p |
| t0093319 | 24 | 1 TGGAATGTAAAGAAGTATGTAATA  | miRNA | miR-1-3p |
| t0093337 | 22 | 1 TGGAACGTAAAGAAGTATGGAG    | miRNA | miR-1-3p |
| t0093461 | 25 | 1 TGGAGACGCGGCCCTGTTGGGGATC | miRNA | miR-139* |
| t0093498 | 20 | 1 TCTACAGAGCTATGTGACAT      | miRNA | miR-139  |
| t0040656 | 21 | 1 CAGTGCAATGTTAAAAAGGCCA    | miRNA | miR-130d |
| t0040660 | 22 | 1 CAGTGCAATGTTAAAAAGGCAT    | miRNA | miR-130d |
| t0043346 | 21 | 1 GAGTGCAATGATGAAAGGGCA     | miRNA | miR-130b |
| t0049018 | 21 | 1 CGGTGCAATGATGAAAGGGCA     | miRNA | miR-130b |
| t0054861 | 22 | 1 CAGTGCAATGATGTAAGGGCAT    | miRNA | miR-130b |
| t0054954 | 21 | 1 CAGTGCAATGATGAAAGGGAA     | miRNA | miR-130b |
| t0061505 | 22 | 1 CAGTGCAATGATGAAAGGGCTT    | miRNA | miR-130b |
| t0064060 | 21 | 1 CAGTGCAATGATGAGAGGGCA     | miRNA | miR-130b |
| t0073129 | 22 | 1 CAGTGCAATGATGCAAGGGCAT    | miRNA | miR-130b |
| t0074884 | 22 | 1 CAGTGCAATAATGAAAGGGCAT    | miRNA | miR-130b |
| t0077739 | 21 | 1 CAGTGCAATGGTGAAGGGCA      | miRNA | miR-130b |
| t0088683 | 23 | 1 CAGTGCAATGATGAAAGGGGAATA  | miRNA | miR-130b |
| t0061151 | 23 | 1 CAGTGCAATGATGAAAGGACATT   | miRNA | miR-130b |
| t0055306 | 21 | 1 CAGGGCAATGATGAAAGGGCA     | miRNA | miR-130b |
| t0090348 | 22 | 1 CAGTACAATGATGAAAGGGCAT    | miRNA | miR-130b |
| t0042347 | 22 | 1 CATTGCAATGATGAAAGGGCAT    | miRNA | miR-130b |
| t0043526 | 22 | 1 CAGGGCAATGATGAAAGGGCAT    | miRNA | miR-130b |
| t0044230 | 21 | 1 CAGTGAAATGTTAAAAGGGCA     | miRNA | miR-130a |
| t0048468 | 21 | 1 CAGTGTAATGTTAAAAGGGAA     | miRNA | miR-130a |
| t0052304 | 23 | 1 CAGTGCAATGTTAAAAGGGCCTA   | miRNA | miR-130a |
| t0053236 | 23 | 1 CAGTGCCATGTTAAAAGGGCCTT   | miRNA | miR-130a |
| t0060318 | 22 | 1 CAGTGAAATGTTAAAAGGGCAT    | miRNA | miR-130a |
| t0063037 | 21 | 1 CAGTGCAATGTCAAAGGGCA      | miRNA | miR-130a |
| t0063968 | 22 | 1 CAGTGCAATGTTAACAGGGCAA    | miRNA | miR-130a |
| t0066446 | 22 | 1 CAGTGCAATGATAAAAAGGGCAT   | miRNA | miR-130a |
| t0076076 | 22 | 1 CAGTGCAATGTTAAAATGGCAT    | miRNA | miR-130a |
| t0077347 | 21 | 1 CAGTGCAATGCTAAAAGGGCA     | miRNA | miR-130a |
| t0085831 | 21 | 1 CAGTGCAATGTTGAAAGGGCA     | miRNA | miR-130a |
| t0086646 | 22 | 1 CAGTGCAATGTTAAAAGGCCAT    | miRNA | miR-130a |
| t0089534 | 22 | 1 CAGAGCAATGTTAAAAGGGCAT    | miRNA | miR-130a |
| t0040870 | 22 | 1 CAGTACAATGTTAAAAGGGCAT    | miRNA | miR-130a |
| t0042737 | 22 | 1 CAGTGCCATGTTAAAAGGGCAT    | miRNA | miR-130a |
| t0044932 | 22 | 1 CAGTGCAATGCTAAAAGGGCAT    | miRNA | miR-130a |
| t0045667 | 23 | 1 GCAGTGCAATGTTAAAAGGGCCT   | miRNA | miR-130a |
| t0046856 | 22 | 1 CAGTGCAACGTTAAAAGGGCAT    | miRNA | miR-130a |
| t0049180 | 22 | 1 CAGTGCAATGTTAAAAGGACAT    | miRNA | miR-130a |
| t0050207 | 22 | 1 CAGTGCAATGTTGAAAGGGCAT    | miRNA | miR-130a |
| t0050793 | 21 | 1 CAGTGCAATGATAAAAAGGGCA    | miRNA | miR-130a |
| t0051534 | 21 | 1 CAGGGCAATGTTAAAAGGGCA     | miRNA | miR-130a |
| t0051940 | 21 | 1 CAGTGCAATGTTAAAAGGGTA     | miRNA | miR-130a |
| t0060105 | 22 | 1 CAGTGCAAGTGTAAAAGGGCAT    | miRNA | miR-130a |
| t0060540 | 20 | 1 CAGTGCAATGTTAAAAGGGT      | miRNA | miR-130a |
| t0062161 | 22 | 1 TAGTGCAATGTTAAAAGGGCAT    | miRNA | miR-130a |
| t0062525 | 21 | 1 AAGTGCAATGTTAAAAGGGCA     | miRNA | miR-130a |
| t0064949 | 22 | 1 CAGTCCAATGTTAAAAGGGCAT    | miRNA | miR-130a |
| t0072076 | 22 | 1 CAGTGTAATGTTAAAAGGGCAT    | miRNA | miR-130a |
| t0076250 | 22 | 1 CCGTGCAATGTTAAAAGGGCAT    | miRNA | miR-130a |
| t0077222 | 20 | 1 ACTCGGCGTGGCGTCGGTCT      | miRNA | miR-1307 |

|          |    |                            |       |           |
|----------|----|----------------------------|-------|-----------|
| t0077355 | 21 | 1 CTCGTCGTGGCGTCGGTCGTG    | miRNA | miR-1307  |
| t0077533 | 20 | 1 ACTCGGAGTGGCGTCGGTTCG    | miRNA | miR-1307  |
| t0081188 | 19 | 1 ACTCGGCGTGGCGTGGGTC      | miRNA | miR-1307  |
| t0081255 | 19 | 1 ACTCGGCGGGGCGTCGGTC      | miRNA | miR-1307  |
| t0082724 | 22 | 1 ACTCGGCGTGGCGTCGGTTGTT   | miRNA | miR-1307  |
| t0084098 | 21 | 1 CTCGGCGTGGAGTCGGTCGTG    | miRNA | miR-1307  |
| t0086689 | 21 | 1 CTCGGCGTGGCGTAGGTCGTG    | miRNA | miR-1307  |
| t0086789 | 20 | 1 ACTCGGCGTGGCGCCGGTTCG    | miRNA | miR-1307  |
| t0089164 | 19 | 1 ACTCGGCGTGGCGTCGGGC      | miRNA | miR-1307  |
| t0090339 | 22 | 1 ACTCGACGTGGCGTCGGTCGTG   | miRNA | miR-1307  |
| t0090494 | 20 | 1 ACTCGGCGTGGCGCCGGGCG     | miRNA | miR-1307  |
| t0091785 | 22 | 1 ACTCGGCGTGGCGTCGGGCGTG   | miRNA | miR-1307  |
| t0041203 | 21 | 1 TTCGGCGTGGCGTCGGTCGTG    | miRNA | miR-1307  |
| t0045629 | 22 | 1 ACTCGGCGTGGCGTCGGTCGAG   | miRNA | miR-1307  |
| t0045731 | 22 | 1 ACTCGGCGTGGCGTCGGTCGGG   | miRNA | miR-1307  |
| t0048950 | 19 | 1 CTCGGCGTGGTGTCTGGTTCG    | miRNA | miR-1307  |
| t0051487 | 20 | 1 ACTCGGCGTGGCGTCGGTCA     | miRNA | miR-1307  |
| t0052501 | 22 | 1 ACTCGGCGTGGCATCGGTTCGTG  | miRNA | miR-1307  |
| t0053492 | 20 | 1 CTCGGCGTGGCGTCGGGCGT     | miRNA | miR-1307  |
| t0053542 | 20 | 1 ACTCGGCGTGGCGTCAGTTCG    | miRNA | miR-1307  |
| t0053634 | 21 | 1 ACTCGGCGTGGCGTCGGGCGT    | miRNA | miR-1307  |
| t0053708 | 20 | 1 ACTCGGCGTGGCATCGGTTCG    | miRNA | miR-1307  |
| t0055019 | 20 | 1 ATTCGGCGTGGCGTCGGGCG     | miRNA | miR-1307  |
| t0057046 | 21 | 1 CTCGACGTGGCGTCGGTCGTG    | miRNA | miR-1307  |
| t0059144 | 22 | 1 CTCGGCGTGGCGTCGGTAGTGG   | miRNA | miR-1307  |
| t0060215 | 21 | 1 ACTCGGCGTGGCGTCGGTAGT    | miRNA | miR-1307  |
| t0062892 | 19 | 1 ACTCAGCGTGGCGTCGGTC      | miRNA | miR-1307  |
| t0066115 | 20 | 1 GCTCGGCGTGGCGTCGGTTCG    | miRNA | miR-1307  |
| t0067971 | 22 | 1 ACTCGGCGTGGGGTCGGTCGTT   | miRNA | miR-1307  |
| t0067986 | 19 | 1 ACTCGGCGTGGCGTCGGTA      | miRNA | miR-1307  |
| t0069550 | 21 | 1 TTTGAGGCTACCGTGAGATGT    | miRNA | miR-1304  |
| t0070154 | 21 | 1 TTCGAGGCTACAGTGAGATTT    | miRNA | miR-1304  |
| t0072610 | 21 | 1 TTTGAGGCTACAGTGAGATGG    | miRNA | miR-1304  |
| t0073201 | 21 | 1 TTTGAGGCTACAGTGAGGTGT    | miRNA | miR-1304  |
| t0073372 | 23 | 1 CGGTTTCGAGGCTACAGTGAGATT | miRNA | miR-1304  |
| t0076420 | 20 | 1 TTTAGAGACGGGGTCTTGGT     | miRNA | miR-1303  |
| t0078448 | 23 | 1 TAGGGCCCTGTCTCCATCTCCTT  | miRNA | miR-1296  |
| t0083874 | 19 | 1 TGTGAGGTTGGCATCGTTG      | miRNA | miR-1294  |
| t0085946 | 19 | 1 TGTGCGGTTGGCATTGTTG      | miRNA | miR-1294  |
| t0086138 | 20 | 1 TGTGCGGTTGGCATTGTTGT     | miRNA | miR-1294  |
| t0086315 | 19 | 1 TGTGAGGTTGGCCTTGTTG      | miRNA | miR-1294  |
| t0086667 | 20 | 1 TGTGAGGTTGGGATTGTTGT     | miRNA | miR-1294  |
| t0086690 | 19 | 1 AGTGAGGTTGGCATTGTTG      | miRNA | miR-1294  |
| t0042251 | 20 | 1 TATGAGGTTGGCATTGTTGT     | miRNA | miR-1294  |
| t0054292 | 19 | 1 TGTGAGGTTGCCATTGTTG      | miRNA | miR-1294  |
| t0080588 | 20 | 1 TGTGAGGTTGGAATTGTTGT     | miRNA | miR-1294  |
| t0087818 | 20 | 1 TGTGAGGGTGGCATTGTTGT     | miRNA | miR-1294  |
| t0093550 | 19 | 1 TATGAGGTTGGCATTGTTG      | miRNA | miR-1294  |
| t0085673 | 19 | 1 TGTGAGGGTGGCATTGTTG      | miRNA | miR-1294  |
| t0041334 | 19 | 1 TGTGAGGTTGGCGTTGTTG      | miRNA | miR-1294  |
| t0041169 | 20 | 1 TGTGAGGTTGACATTGTTGT     | miRNA | miR-1294  |
| t0049449 | 19 | 1 TGCGAGGTTGGCATTGTTG      | miRNA | miR-1294  |
| t0053516 | 20 | 1 ATGGATTTTTGGCGCAGGGA     | miRNA | miR-1290  |
| t0059584 | 24 | 1 CTTTTTGTGGTCTGGGCTTGCATC | miRNA | miR-129   |
| t0061321 | 24 | 1 CTTTTTGCGGTCTGGGATTGCATC | miRNA | miR-129   |
| t0062533 | 24 | 1 CTTTTTGCGGTCTGGGCTTGTATC | miRNA | miR-129   |
| t0063557 | 24 | 1 TCTAGGCAACAAAGTGAGACCTGA | miRNA | miR-1285a |
| t0068941 | 23 | 1 TCCGGGCAACAAAGTGAGACCTA  | miRNA | miR-1285  |

|          |    |                                 |       |             |
|----------|----|---------------------------------|-------|-------------|
| t0071377 | 23 | 1 TCTGGGCAACAAAGGGAGACCTA       | miRNA | miR-1285    |
| t0073312 | 21 | 1 TCTGGGTAACAAAGTGAGACC         | miRNA | miR-1285    |
| t0075197 | 24 | 1 TCTGGGCAACATAGTGAGACCTGA      | miRNA | miR-1285    |
| t0079229 | 24 | 1 TCTGGGCAACAAAGTGGGACCTGA      | miRNA | miR-1285    |
| t0082880 | 24 | 1 TCTGGACAACAAAGTGAGACCTGA      | miRNA | miR-1285    |
| t0087348 | 20 | 1 TCTGGGCAACAAAGTGAAAC          | miRNA | miR-1285    |
| t0090774 | 20 | 1 TCTGGGCAAAAAAGTGAGAC          | miRNA | miR-1285    |
| t0091365 | 19 | 1 TCACAGTGAACCGGTCTAT           | miRNA | miR-128     |
| t0054550 | 20 | 1 TCGCAGTGAACCGGTCTCTT          | miRNA | miR-128     |
| t0063633 | 21 | 1 TCACAGTGGACCGGTCTCTTT         | miRNA | miR-128     |
| t0069798 | 20 | 1 TCACAGTGAACCGGTTTCTT          | miRNA | miR-128     |
| t0050269 | 21 | 1 TCACAGCGAACCGGTCTCTTG         | miRNA | miR-128     |
| t0043852 | 20 | 1 TCACAGTGAACCGGTCTCTT          | miRNA | miR-128     |
| t0044977 | 21 | 1 TCACAGTGAACCGGGCTCTTT         | miRNA | miR-128     |
| t0046022 | 20 | 1 TCACAGTGATCCGGTCTCTT          | miRNA | miR-128     |
| t0059777 | 21 | 1 TCACAGTGAACCGATCTCTTT         | miRNA | miR-128     |
| t0067010 | 20 | 1 TAGGACTGTGCATATCATCT          | miRNA | miR-1278    |
| t0071568 | 20 | 1 TACGTAGATATATATGTATT          | miRNA | miR-1277    |
| t0077691 | 21 | 1 GCGGGGAGAGGCTGTAATTT          | miRNA | miR-1275    |
| t0083064 | 21 | 1 TGAGAGGCAGAGGTTGCAGGG         | miRNA | miR-1273f   |
| t0040791 | 23 | 1 TGAGAGGCAGAGGTTGCCGTGGA       | miRNA | miR-1273f   |
| t0054343 | 21 | 1 TGGGAGGCCGAGGTTGCAGTG         | miRNA | miR-1273f   |
| t0054817 | 25 | 1 GCGGACAAAACGAGACCTGGCAA       | miRNA | miR-1273c   |
| t0058105 | 23 | 1 CTGGAGATATGGAAGAGCTGTGG       | miRNA | miR-1270    |
| t0074372 | 22 | 1 CTGGAGATATGGCAGAGCTGTG        | miRNA | miR-1270    |
| t0076598 | 23 | 1 ACTGGAGACATGGAAGAGCTGTG       | miRNA | miR-1270    |
| t0082918 | 23 | 1 ACTGGAGATATGGAAGAGCTGGG       | miRNA | miR-1270    |
| t0084452 | 24 | 1 TCGGAACCGTCTGAGCTTGGTATC      | miRNA | miR-127     |
| t0092276 | 24 | 1 TCGGATCCGTCCGAGCTTGGCATC      | miRNA | miR-127     |
| t0057338 | 24 | 1 TCGGATCCGTCCGAGCTTGGTATC      | miRNA | miR-127     |
| t0059590 | 24 | 1 TCGGATCCGTCTGAGATTGGTATC      | miRNA | miR-127     |
| t0083864 | 21 | 1 ATCCTACCGTGCCACCAAAA          | miRNA | miR-1260b   |
| t0063790 | 20 | 1 ATCCCACCGTGCCACCACG           | miRNA | miR-1260b   |
| t0070018 | 21 | 1 ATCCCACCTTGCCACCAAAA          | miRNA | miR-1260b   |
| t0071648 | 21 | 1 ATCCCACCACTGCCACCAAAA         | miRNA | miR-1260b   |
| t0066484 | 21 | 1 ATCCCACCGTGCCACAAAGA          | miRNA | miR-1260b   |
| t0060176 | 20 | 1 ATCCCACCGTGCCACGAAG           | miRNA | miR-1260b   |
| t0073420 | 20 | 1 ATCCCAACGCTGCCACCAAA          | miRNA | miR-1260    |
| t0081625 | 20 | 1 ATCCCAACGCTGCCACCAAG          | miRNA | miR-1260    |
| t0089691 | 26 | 1 CTCGTACCGTGAGTAATCATGCGATC    | miRNA | miR-126     |
| t0049500 | 25 | 1 TCGTACCGTGAGTGATAATGCAATC     | miRNA | miR-126     |
| t0051992 | 25 | 1 TCGTACCGTGAGTAATAATGCAATA     | miRNA | miR-126     |
| t0077055 | 24 | 1 CGTACCGTGAGTAATAATGCGCTC      | miRNA | miR-126     |
| t0085953 | 25 | 1 ACGTACCGTGAGTAATAATGCGATC     | miRNA | miR-126     |
| t0052553 | 25 | 1 TCGTACCGTGAGTAATAATGCGCTC     | miRNA | miR-126     |
| t0053384 | 25 | 1 TCGTACCGTGAGTGATAATGCGATC     | miRNA | miR-126     |
| t0059332 | 23 | 1 GTACCGTGAGTAATAATGCGATC       | miRNA | miR-126     |
| t0060497 | 25 | 1 TCGTACCGTGAGGAATAATGCGATC     | miRNA | miR-126     |
| t0078576 | 25 | 1 TCGTACCGTGAGGACTAATGCGATC     | miRNA | miR-126     |
| t0090165 | 25 | 1 TCGTACCGTGGTAATAATGCGATC      | miRNA | miR-126     |
| t0053074 | 26 | 1 CCCGTACCGTGAGTAATAATGCGATC    | miRNA | miR-126     |
| t0068640 | 42 | 1 TCCCTGAGACCCTAACTTGTGAGTCTGGG | miRNA | miR-125b-5p |
| t0045740 | 22 | 1 AGTCATTGACTTCTCTTAGCT         | miRNA | miR-1256    |
| t0048912 | 22 | 1 AGGCATTGACTTCTACTAGAT         | miRNA | miR-1256    |
| t0049055 | 22 | 1 CGGCTGAGCAAAGAAAGTGGTT        | miRNA | miR-1255b   |
| t0054208 | 22 | 1 TGGATGAGCAAAGAAAGTGGTT        | miRNA | miR-1255b   |
| t0061530 | 22 | 1 CGGATGAGCAAAGAAAGAGGTT        | miRNA | miR-1255b   |
| t0062458 | 22 | 1 CGGATGAGCAAAGAAAGTGGGT        | miRNA | miR-1255b   |

|          |    |                              |       |             |
|----------|----|------------------------------|-------|-------------|
| t0066747 | 21 | 1 CGGATGAGAAAAGAAAGTGGT      | miRNA | miR-1255b   |
| t0079121 | 21 | 1 CGGATGCGCAAAGAAAGTGGT      | miRNA | miR-1255b   |
| t0081370 | 22 | 1 CGGATGACCAAAGAAAGTGGTT     | miRNA | miR-1255b   |
| t0082705 | 22 | 1 AGCCTGGAAGCTGGAGCCTGCC     | miRNA | miR-1254    |
| t0083218 | 21 | 1 TAGGCACGCTGTGAAGAGACA      | miRNA | miR-124e    |
| t0083608 | 20 | 1 TAAGACTCGGTGGATGCTCA       | miRNA | miR-124b    |
| t0046537 | 20 | 1 GTGGGCGGGGGCAGGTGGGT       | miRNA | miR-1228*   |
| t0045102 | 21 | 1 GTGGGCGGGGGCAGGTGTGGG      | miRNA | miR-1228*   |
| t0069508 | 20 | 1 GTGGGCGGGGGCAGGTATGT       | miRNA | miR-1228*   |
| t0049247 | 21 | 1 GGGGGCGGGGGCAGGTGTGGG      | miRNA | miR-1228*   |
| t0050984 | 21 | 1 CGTGCCACCCTTTTTCCAGT       | miRNA | miR-1227    |
| t0057149 | 21 | 1 GTGAGGACTCGGGAGGTGAGA      | miRNA | miR-1224-5p |
| t0065341 | 21 | 1 CCCCTCACCTCTCCTGCAG        | miRNA | miR-1224-3p |
| t0077385 | 23 | 1 CTTCCCCACCCTCTCCTGCAGGA    | miRNA | miR-1224-3p |
| t0078129 | 21 | 1 GTGAGGACTCGGGAAGTGGAG      | miRNA | miR-1224    |
| t0086202 | 20 | 1 GCGAGGACTTGGGAGGTGGA       | miRNA | miR-1224    |
| t0085837 | 20 | 1 GCGAGGACTCGGGAAGTGGAG      | miRNA | miR-1224    |
| t0070993 | 19 | 1 GTGGGGACTCGGGAGGTGG        | miRNA | miR-1224    |
| t0041758 | 22 | 1 GTGAGGACTCGGGAGGTGGAGC     | miRNA | miR-1224    |
| t0057574 | 20 | 1 GTGAGGATTCGGGAGGTGGA       | miRNA | miR-1224    |
| t0057710 | 19 | 1 GTGATGACTCGGGAGGTGG        | miRNA | miR-1224    |
| t0067147 | 21 | 1 GGGAGGACTCGGGAGGTGGAG      | miRNA | miR-1224    |
| t0092579 | 21 | 1 GGGAGGACTCGGGAGGGGGAG      | miRNA | miR-1224    |
| t0090618 | 21 | 1 GTGAGGACTCGGGAGGCGGAG      | miRNA | miR-1224    |
| t0082206 | 21 | 1 GTGAGGACTCGGGAGGTTGAA      | miRNA | miR-1224    |
| t0071479 | 24 | 1 TGGAGGGTGACAATGGTGTTCATC   | miRNA | miR-122     |
| t0072201 | 21 | 1 TGGAGTGTGACAATGGGGTTT      | miRNA | miR-122     |
| t0043412 | 22 | 1 TGGAGTGTGGCAATGGTGTTC      | miRNA | miR-122     |
| t0052725 | 26 | 1 TGGAGTGTGACAATGGTGTTCGTTTC | miRNA | miR-122     |
| t0054698 | 24 | 1 TTGAGTGTGACAATGGTGTTCATC   | miRNA | miR-122     |
| t0062027 | 21 | 1 TGGAGTGTGACAATGGAGTTT      | miRNA | miR-122     |
| t0069154 | 24 | 1 TGGAGTGTGACAATGGTGTTCCTC   | miRNA | miR-122     |
| t0070968 | 24 | 1 TGGAGTGAGACAATGGTGTTCATC   | miRNA | miR-122     |
| t0076155 | 20 | 1 TTTCCGGCTCGCGTGGGCGT       | miRNA | miR-1180    |
| t0078083 | 20 | 1 TTTCCGGCTCGCGTGGGCGC       | miRNA | miR-1180    |
| t0082496 | 25 | 1 ACCCTGTAGAACCGAATTTGTGATC  | miRNA | miR-10d     |
| t0086491 | 25 | 1 TACCCTGTAGAACCGAATTTTATC   | miRNA | miR-10b     |
| t0092216 | 24 | 1 ACCCTGTAGAACCGAATTTGTATC   | miRNA | miR-10b     |
| t0049698 | 25 | 1 TACCCTGTAGATCCAAATTTGTATC  | miRNA | miR-10a     |
| t0050012 | 25 | 1 TACCCTGAAGATCCGAATTTGTATC  | miRNA | miR-10a     |
| t0051225 | 25 | 1 TACCCTGTAGATCCGAATTTTATC   | miRNA | miR-10a     |
| t0054270 | 25 | 1 TACCCTGTAGATCCGAATTTGGATC  | miRNA | miR-10a     |
| t0059543 | 25 | 1 TACCCTGTAGATCCGATTTTGTATC  | miRNA | miR-10a     |
| t0063331 | 22 | 1 TACTCTGTAGATCCGAATTTGT     | miRNA | miR-10a     |
| t0074591 | 25 | 1 TACCCTGTAGATCCGAATTTGAATC  | miRNA | miR-10a     |
| t0091410 | 25 | 1 TACCCTGTAGATCCGAATTTGCATC  | miRNA | miR-10a     |
| t0081175 | 21 | 1 TACCCTATAGATCCGAATTTG      | miRNA | miR-10a     |
| t0082641 | 25 | 1 TACTACTGAAGATCCGAATTTGTATC | miRNA | miR-10a     |
| t0081544 | 21 | 1 AGAAGCATTGTACAGGGCATT      | miRNA | miR-107b    |
| t0058974 | 22 | 1 AGCAGTATTGTACAGGGCTTTG     | miRNA | miR-107b    |
| t0059132 | 21 | 1 AGCAGCATTGTACAGGGGTTT      | miRNA | miR-107b    |
| t0042978 | 20 | 1 AGCAGCATAGTACAGGGCTT       | miRNA | miR-107b    |
| t0045016 | 20 | 1 AGCAGCATTGTGCAGGGCTT       | miRNA | miR-107b    |
| t0047900 | 20 | 1 AGCAGCATTGTACAGGGATT       | miRNA | miR-107b    |
| t0050568 | 21 | 1 AGCAGCATTGTACAGGGATTT      | miRNA | miR-107b    |
| t0053321 | 22 | 1 AGCAGCATTGTACAGGGCTTTT     | miRNA | miR-107b    |
| t0060874 | 20 | 1 AGCAGCATTGTACAGGGGAT       | miRNA | miR-107b    |
| t0062999 | 23 | 1 AACAGCATTGTACAGGGCTATAA    | miRNA | miR-107     |



|          |    |                                 |       |           |
|----------|----|---------------------------------|-------|-----------|
| t0064956 | 23 | 1 AGCAGCATTGTACAGGGTTATAA       | miRNA | miR-107   |
| t0069518 | 23 | 1 AGCAGCATTGTACAGGGATATCT       | miRNA | miR-107   |
| t0081310 | 22 | 1 AGCAGCTTTGTACAGGGCTATT        | miRNA | miR-107   |
| t0057355 | 25 | 1 GGCAGCATTGTACAGGGCTATAAAC     | miRNA | miR-107   |
| t0058444 | 22 | 1 AGCAGCATTGTAGAGGGCTATT        | miRNA | miR-107   |
| t0060330 | 22 | 1 AGCAGCATTGTATAGGGCTCTT        | miRNA | miR-107   |
| t0076463 | 22 | 1 GGCAGCATTGTACAGGGCTATA        | miRNA | miR-107   |
| t0082409 | 24 | 1 AGCAGCATTGTACAGGGCTATAAT      | miRNA | miR-107   |
| t0082421 | 22 | 1 AGGAGCATTGTACAGGGCTATA        | miRNA | miR-107   |
| t0086784 | 22 | 1 AGCAGCATAGTACAGGGCTATA        | miRNA | miR-107   |
| t0090516 | 22 | 1 AGCAGCATTGTACAGGGGTATT        | miRNA | miR-107   |
| t0092015 | 23 | 1 AGCAGCATTGTACAGGGCTATAG       | miRNA | miR-107   |
| t0041083 | 23 | 1 AGTAGCATTGTACAGGGCTATAA       | miRNA | miR-107   |
| t0044966 | 22 | 1 AGCAGCATTGTACCGGGCTATT        | miRNA | miR-107   |
| t0045072 | 23 | 1 AGCAGCATTGGACAGGGCTATAA       | miRNA | miR-107   |
| t0047131 | 22 | 1 AGCACCATTGTACAGGGCTAGT        | miRNA | miR-107   |
| t0048601 | 22 | 1 AGCAGCATTGTACAGGACTATT        | miRNA | miR-107   |
| t0054029 | 22 | 1 AGCAGCATTGTACAAGGCTATA        | miRNA | miR-107   |
| t0054493 | 22 | 1 AGCAGCATTGTCCAGGGCTATT        | miRNA | miR-107   |
| t0056366 | 22 | 1 AGCAGCACTGTACAGGGCTATA        | miRNA | miR-107   |
| t0056405 | 22 | 1 AGCAGCATTGTACATGGCTATT        | miRNA | miR-107   |
| t0058235 | 23 | 1 AGAAGCATTGTACAGGGCTATAA       | miRNA | miR-107   |
| t0058927 | 22 | 1 AGCAGCATTGTACAGGGCAATT        | miRNA | miR-107   |
| t0061500 | 22 | 1 AGCAGCCTTGTACAGGGCTATT        | miRNA | miR-107   |
| t0066217 | 23 | 1 AGCAGCATGGTACAGGGCTATAA       | miRNA | miR-107   |
| t0066752 | 22 | 1 AGCAGGATTGTACAGGGCTATA        | miRNA | miR-107   |
| t0066824 | 22 | 1 AGCAGGATTGTACAGGGCTATT        | miRNA | miR-107   |
| t0070217 | 23 | 1 ACCAGCATTGTACAGGGCTATAA       | miRNA | miR-107   |
| t0070319 | 23 | 1 AGCAGCATTGTACAAGGCTATAA       | miRNA | miR-107   |
| t0071688 | 22 | 1 AGCAGCATTGTACGGGGCTATT        | miRNA | miR-107   |
| t0073683 | 23 | 1 AGCGGCATTGTACAGGGCTATAA       | miRNA | miR-107   |
| t0073687 | 22 | 1 AGCAGCATTGTGCAGGGCTATA        | miRNA | miR-107   |
| t0076733 | 20 | 1 CAGCATTGTACAGGGCTATC          | miRNA | miR-107   |
| t0077961 | 22 | 1 AGCACCATTGTACAGGGCTATT        | miRNA | miR-107   |
| t0080940 | 21 | 1 CCGCACTGTGGGTACTTGCTT         | miRNA | miR-106b* |
| t0083706 | 22 | 1 TACCGCACTGTGGGTACTTACT        | miRNA | miR-106b* |
| t0084031 | 21 | 1 ACCGCGCTGTGGGTACTTGCT         | miRNA | miR-106b* |
| t0085063 | 24 | 1 CCGCACTGTGGGTACTTGCTGAGA      | miRNA | miR-106b* |
| t0085099 | 21 | 1 TACCGCACTGTGGGTAATTGT         | miRNA | miR-106b* |
| t0088728 | 22 | 1 CCGCACTGTGGGGACTTGCTGA        | miRNA | miR-106b* |
| t0089494 | 20 | 1 CCGCACCGTGGGTACTTGCT          | miRNA | miR-106b* |
| t0089537 | 22 | 1 CCGCACTGTGGGTACTTGCTGG        | miRNA | miR-106b* |
| t0090561 | 29 | 1 TACCGCACTGTGGGTAATTGCTAAAAAGC | miRNA | miR-106b* |
| t0090864 | 21 | 1 ACCGCACTGTGGGTACTTGTT         | miRNA | miR-106b* |
| t0090976 | 23 | 1 CCGCACTGGGGGTACTTGCTGAA       | miRNA | miR-106b* |
| t0092136 | 22 | 1 TACCGCACTGTGGGCACTTGCA        | miRNA | miR-106b* |
| t0092751 | 21 | 1 ATCGCACTGTGGGTACTTGCT         | miRNA | miR-106b* |
| t0040846 | 23 | 1 CCGCACTGTGGGTACTTACTGCA       | miRNA | miR-106b* |
| t0041321 | 21 | 1 CCGCACTGTGGGTAATTGCTG         | miRNA | miR-106b* |
| t0041527 | 22 | 1 TACCGCCCTGTGGGTACTTGCT        | miRNA | miR-106b* |
| t0042045 | 20 | 1 CCGCGCTGTGGGTACTTGAT          | miRNA | miR-106b* |
| t0042346 | 29 | 1 TACCGCACTGTGGGTACTTGCTAAAAAAC | miRNA | miR-106b* |
| t0043748 | 20 | 1 TACCGCACTGTGGGTACTTT          | miRNA | miR-106b* |
| t0047723 | 20 | 1 CCGCGCTGTGGGTACTTGCT          | miRNA | miR-106b* |
| t0047960 | 21 | 1 ACCGCACTGTGGGCACTTGCT         | miRNA | miR-106b* |
| t0047978 | 20 | 1 ACGCACTGTGGGTACTTGCT          | miRNA | miR-106b* |
| t0048985 | 21 | 1 GCCGCACTGTGGGTACTTGCT         | miRNA | miR-106b* |
| t0049369 | 20 | 1 CCGCACTGTGGGTACTCGCT          | miRNA | miR-106b* |

|          |    |                            |       |           |
|----------|----|----------------------------|-------|-----------|
| t0053633 | 21 | 1 ACCGCACTGTGGGTACTTGCT    | miRNA | miR-106b* |
| t0053783 | 22 | 1 CCGAACTGTGGGTACTTGCTGA   | miRNA | miR-106b* |
| t0054441 | 20 | 1 CCGCACTGTGGGTACTTACT     | miRNA | miR-106b* |
| t0055137 | 22 | 1 GCGCACTGTGGGTACTTGCTGA   | miRNA | miR-106b* |
| t0055190 | 23 | 1 CCGCACTGCGGGTACTTGCTGAA  | miRNA | miR-106b* |
| t0057128 | 20 | 1 CCGAACTGTGGGTACTTGCT     | miRNA | miR-106b* |
| t0059136 | 22 | 1 TACCGCACTGAGGGTACTTGCT   | miRNA | miR-106b* |
| t0060063 | 23 | 1 CCGCACTGTGGGGACTTGCTGCA  | miRNA | miR-106b* |
| t0060083 | 22 | 1 TACCGCACTGGGGGACTTGCT    | miRNA | miR-106b* |
| t0060111 | 21 | 1 ACCGCACTGTGGGTACTGGCT    | miRNA | miR-106b* |
| t0060979 | 22 | 1 TACCGCACTGTGGGTAATTGCT   | miRNA | miR-106b* |
| t0062015 | 24 | 1 CCGCACTGTGGGTCCTTGCTGCGA | miRNA | miR-106b* |
| t0062844 | 21 | 1 ACCGCACTGTGGGTGCTTGCT    | miRNA | miR-106b* |
| t0063210 | 22 | 1 TACCACACTGTGGGTACTTGCT   | miRNA | miR-106b* |
| t0063904 | 22 | 1 TACCGCACCGTGGGTACTTGCT   | miRNA | miR-106b* |
| t0066719 | 21 | 1 TACCGCACTGTGGGTACTTCT    | miRNA | miR-106b* |
| t0067025 | 21 | 1 CCGCACTGTGGGGACTTGCTG    | miRNA | miR-106b* |
| t0067635 | 22 | 1 CCGCACTGTGGGAACCTTGCTGA  | miRNA | miR-106b* |
| t0068087 | 22 | 1 TACCGAACTGTGGGTACTTGCT   | miRNA | miR-106b* |
| t0068721 | 22 | 1 TACCGCACTGTGGGTACTTGCC   | miRNA | miR-106b* |
| t0068852 | 20 | 1 CCGCACTGTGGGTACATGCT     | miRNA | miR-106b* |
| t0069951 | 20 | 1 CCGCACTGTAGGTACTTGCT     | miRNA | miR-106b* |
| t0070238 | 21 | 1 AACGCACTGTGGGTACTTGCT    | miRNA | miR-106b* |
| t0070292 | 23 | 1 TACCGCACTGTGGGTAATTGCTA  | miRNA | miR-106b* |
| t0070829 | 20 | 1 GCGCACTGTGGGTAATTGCT     | miRNA | miR-106b* |
| t0070841 | 21 | 1 CCGCACTGTGGGCACTTGCTG    | miRNA | miR-106b* |
| t0071177 | 20 | 1 CCGCACTGTGGGCACTTGCT     | miRNA | miR-106b* |
| t0071374 | 20 | 1 CCGCACTGGGGGTACTTGCT     | miRNA | miR-106b* |
| t0071412 | 23 | 1 TACCGCACTGTGGGGACTTGCTA  | miRNA | miR-106b* |
| t0076138 | 22 | 1 CCGCACTGTGGGTACTTGCTGC   | miRNA | miR-106b* |
| t0077815 | 24 | 1 TAAAGTGCTGACAGCGCAGATAGA | miRNA | miR-106b  |
| t0078114 | 20 | 1 TAAAGTGCTGACAGTGGAGA     | miRNA | miR-106b  |
| t0078635 | 21 | 1 TAAAGTGCCGACAGTGCAGAT    | miRNA | miR-106b  |
| t0079603 | 20 | 1 TAAATGCTGACAGTGCAGA      | miRNA | miR-106b  |
| t0080955 | 24 | 1 TAAAGAGCTGACAGTGCAGATAGT | miRNA | miR-106b  |
| t0083560 | 23 | 1 TAAAGTGCTGACAGTGCCGATAG  | miRNA | miR-106b  |
| t0084512 | 20 | 1 TAAAGTGCTGACAGTGCAGC     | miRNA | miR-106b  |
| t0084884 | 20 | 1 TAAAGTGCTGACAGTGCCTA     | miRNA | miR-106b  |
| t0085240 | 21 | 1 TAAAGTGCTGACAGTGTAGAT    | miRNA | miR-106b  |
| t0086607 | 20 | 1 TGAAGTGCTGACAGTGCAGA     | miRNA | miR-106b  |
| t0090841 | 23 | 1 TAAAGTGCTGACAGAGCAGATAG  | miRNA | miR-106b  |
| t0091376 | 22 | 1 TAAAGTGCTGACAGTGCCGATG   | miRNA | miR-106b  |
| t0091968 | 22 | 1 TAAAGTGCTGACAGTGCCGATT   | miRNA | miR-106b  |
| t0041384 | 20 | 1 TAAAGTGCTGACAGTGCAGG     | miRNA | miR-106b  |
| t0041766 | 20 | 1 AAAGAGCTGACAGTGCAGAT     | miRNA | miR-106b  |
| t0043442 | 23 | 1 TAAAGTGCTGACAGTGCAGATCA  | miRNA | miR-106b  |
| t0043923 | 21 | 1 TAAAGTGCTGACAATGCAGAT    | miRNA | miR-106b  |
| t0044104 | 23 | 1 TAAAGTGCTGACAGTGCCGATAA  | miRNA | miR-106b  |
| t0044693 | 23 | 1 TAAAGTGCTGACACTGCAGATAT  | miRNA | miR-106b  |
| t0044710 | 22 | 1 TAAAGTGCTGACAGGGCAGAAA   | miRNA | miR-106b  |
| t0045135 | 22 | 1 TAAAGTGCTAACAGTGCAGATT   | miRNA | miR-106b  |
| t0045280 | 21 | 1 TAAAGTGCTGACAGAGCAGAA    | miRNA | miR-106b  |
| t0045603 | 20 | 1 TAAAGTGCTGACAGTGCAAA     | miRNA | miR-106b  |
| t0046067 | 21 | 1 TAAAGTGCTGATAGTGCAGAT    | miRNA | miR-106b  |
| t0046282 | 20 | 1 TAAAGTGCTGAAAGTGCAGA     | miRNA | miR-106b  |
| t0046852 | 21 | 1 TAAAGTGCTGACAGTACAGAT    | miRNA | miR-106b  |
| t0046901 | 20 | 1 TAAAGTGCTGACAATGCAGA     | miRNA | miR-106b  |
| t0047358 | 20 | 1 TAAAGTGCTGACAGTGTGA      | miRNA | miR-106b  |

|          |    |                            |       |          |
|----------|----|----------------------------|-------|----------|
| t0047738 | 23 | 1 TAAAGTGCTGACAGTGCCGATGA  | miRNA | miR-106b |
| t0048104 | 21 | 1 TAAGGTGCTGACAGTGCAGAT    | miRNA | miR-106b |
| t0050300 | 21 | 1 TAAAGTGCTGACGGTGCAGAA    | miRNA | miR-106b |
| t0052025 | 24 | 1 TAAAGTGCTGACAGTGCCGATAGA | miRNA | miR-106b |
| t0053025 | 20 | 1 TAAACTGCTGACAGTGCAGA     | miRNA | miR-106b |
| t0053132 | 22 | 1 TAAAGTACTGACAGTGCAGATA   | miRNA | miR-106b |
| t0053519 | 20 | 1 TAAAGTGCTGGCAGTGCAGA     | miRNA | miR-106b |
| t0058115 | 22 | 1 TAAAGGGCTGACAGTGCAGATA   | miRNA | miR-106b |
| t0058158 | 20 | 1 TAAAGGGCTGACAGGGCAGA     | miRNA | miR-106b |
| t0058592 | 21 | 1 TAAAGTGCTGACAGTGGAGAA    | miRNA | miR-106b |
| t0058908 | 24 | 1 TAAAGTGCTGACAGCGCAGATAGT | miRNA | miR-106b |
| t0059533 | 21 | 1 TAAAGTGTTGACAGTGCAGAT    | miRNA | miR-106b |
| t0061059 | 22 | 1 TAAAGTGCTTACAGTGCAGATA   | miRNA | miR-106b |
| t0061290 | 22 | 1 TAAAGTGCTAACAGTGCAGATA   | miRNA | miR-106b |
| t0061969 | 20 | 1 TAAGGTGCTGACAGTGCAGA     | miRNA | miR-106b |
| t0062980 | 20 | 1 TAAAGTGCAGACAGTGCAGA     | miRNA | miR-106b |
| t0063189 | 20 | 1 TAAAGTGCTGAGAGTGCAGA     | miRNA | miR-106b |
| t0063480 | 22 | 1 TAAAGTGCTGACAGGGCAGATT   | miRNA | miR-106b |
| t0063749 | 21 | 1 TAAAGTGCTGACAGTGCAAAT    | miRNA | miR-106b |
| t0063970 | 22 | 1 TAAAGTGCTGATAGTGCAGATA   | miRNA | miR-106b |
| t0064128 | 20 | 1 TAAAGTGCTGACAGTACAGA     | miRNA | miR-106b |
| t0065872 | 22 | 1 TAAAGTGCTGACAGTGAAGATG   | miRNA | miR-106b |
| t0066134 | 22 | 1 TAGAGTGCTGACAGTGCAGATA   | miRNA | miR-106b |
| t0066427 | 19 | 1 TAAGTGCTGACAGTGCAGA      | miRNA | miR-106b |
| t0067104 | 22 | 1 TAAAGTGCTGACAGTGCCGATC   | miRNA | miR-106b |
| t0069127 | 20 | 1 TAAAGTGCTGATAGGGCAGA     | miRNA | miR-106b |
| t0069250 | 22 | 1 TAAAGTGCTGACAGAGCAGAAA   | miRNA | miR-106b |
| t0069424 | 22 | 1 TAAAGTGCTGACAGGGCAGATG   | miRNA | miR-106b |
| t0072353 | 21 | 1 TAAACTGCTGACAGTGCAGAT    | miRNA | miR-106b |
| t0073446 | 22 | 1 ATAAAGTGCTGACCGTGCAGAT   | miRNA | miR-106b |
| t0073949 | 22 | 1 TAAAGTGCTGAGAGTGCAGATA   | miRNA | miR-106b |
| t0074105 | 20 | 1 TAAAGTGCTGACATTGCAGA     | miRNA | miR-106b |
| t0074428 | 21 | 1 TAAAGTGCAGACAGTGCAGAT    | miRNA | miR-106b |
| t0074534 | 20 | 1 TAACGTGCTGACAGTGCAGA     | miRNA | miR-106b |
| t0075929 | 20 | 1 TAAAGTGCTGACAGTGCAGT     | miRNA | miR-106b |
| t0076788 | 20 | 1 TAAAGTGCGGACAGTGCAGA     | miRNA | miR-106b |
| t0077082 | 21 | 1 TAAAGTGCTGTCACTGCAGAT    | miRNA | miR-106b |
| t0077172 | 22 | 1 ATAAAGGGCTGACAGTGAAGAA   | miRNA | miR-106b |
| t0077577 | 20 | 1 TAAAGTGCTGACAGGGAAGA     | miRNA | miR-106b |
| t0077740 | 21 | 1 TAAAGTGCTGACAGCGCAGAA    | miRNA | miR-106b |
| t0078666 | 20 | 1 TAAAGTACTGACAGTGCAGA     | miRNA | miR-106b |
| t0078748 | 21 | 1 TAAAGAGCTGACAGTGCAGAA    | miRNA | miR-106b |
| t0081381 | 23 | 1 AAAAGTGCTTACAGTGAAGGTAG  | miRNA | miR-106  |
| t0083022 | 21 | 1 AAAAGTGCTTACAGTGCAGGA    | miRNA | miR-106  |
| t0083231 | 21 | 1 AAAAGTGCTCACAGTGCAGGT    | miRNA | miR-106  |
| t0083285 | 23 | 1 AAAAGTGCTTACAGTGCAGGCAG  | miRNA | miR-106  |
| t0083336 | 22 | 1 AAAAGTACTTACAGTGCAGGTA   | miRNA | miR-106  |
| t0083851 | 21 | 1 AGAAGTGCTTACAGTGCAGGT    | miRNA | miR-106  |
| t0085180 | 24 | 1 AAAAGTGCTTACAGTGCAGGTAGA | miRNA | miR-106  |
| t0087267 | 22 | 1 AAAAGTGCTTACAGTGCAGGTC   | miRNA | miR-106  |
| t0090281 | 22 | 1 AAAAGTGCCTACAGTGCAGGTA   | miRNA | miR-106  |
| t0090594 | 23 | 1 AAAAGTGATTACAGTGCAGGTAG  | miRNA | miR-106  |
| t0093198 | 22 | 1 AAAAGTGCTTACAGTGAAGGTA   | miRNA | miR-106  |
| t0093438 | 21 | 1 AAAAATGCTTACAGTGCAGGT    | miRNA | miR-106  |
| t0093489 | 22 | 1 AAAGGGCTTACAGTGCAGGTAA   | miRNA | miR-106  |
| t0046905 | 22 | 1 AAAAGTGCTTAAAGTGCAGGTA   | miRNA | miR-106  |
| t0047343 | 22 | 1 AAAAGTGCTTACAGTGCCGGTC   | miRNA | miR-106  |
| t0052392 | 22 | 1 AAAAGTGCTTACAGCGCAGGTA   | miRNA | miR-106  |

|          |    |                              |       |             |
|----------|----|------------------------------|-------|-------------|
| t0052418 | 22 | 1 AAAAGTGCTTACAGTGCAAGTA     | miRNA | miR-106     |
| t0052834 | 21 | 1 AAAAGTGCTTACAGTGCAGGC      | miRNA | miR-106     |
| t0053873 | 23 | 1 AAAAGTGCTTACAGTGCTGGTAG    | miRNA | miR-106     |
| t0054092 | 23 | 1 AAAAGTACTTACAGTGCAGGTAG    | miRNA | miR-106     |
| t0056427 | 22 | 1 AAAAGTGCTTACAGGGCAGGTA     | miRNA | miR-106     |
| t0060709 | 23 | 1 AACAGTGCTTACAGTGCCGGTAG    | miRNA | miR-106     |
| t0060786 | 22 | 1 AAAAGAGCTTACAGTGCAGGAA     | miRNA | miR-106     |
| t0060823 | 22 | 1 AAAAGTGCTTACAGTGCCGGTA     | miRNA | miR-106     |
| t0063044 | 21 | 1 AAAAGTGATTACAGTGCAGGT      | miRNA | miR-106     |
| t0071102 | 26 | 1 ACCCTGTAGATCCGAGTTTGTGAATC | miRNA | miR-10-5p   |
| t0079002 | 21 | 1 ACCCTGTGGATCCGAATTTGT      | miRNA | miR-10-5p   |
| t0079164 | 22 | 1 AGCTTCTTTACAGGGCTGCCTT     | miRNA | miR-103a-2* |
| t0079710 | 25 | 1 AGCAGCATTGTACAGGGCTATGAGA  | miRNA | miR-103a    |
| t0079832 | 22 | 1 AGCAGCATAGTACAGGGTTATG     | miRNA | miR-103a    |
| t0081505 | 23 | 1 AGCAGCATTGTACAGGGCGAAGA    | miRNA | miR-103a    |
| t0082009 | 21 | 1 AGCAGCATCGTACAGGGCTAA      | miRNA | miR-103a    |
| t0084269 | 21 | 1 AGCAGCATTTTACAGTGCTAT      | miRNA | miR-103a    |
| t0085222 | 23 | 1 AGCAGCATTGTCCAGGGCTATGT    | miRNA | miR-103a    |
| t0085588 | 19 | 1 AGCAGCATTGTACAAGGCA        | miRNA | miR-103a    |
| t0085789 | 21 | 1 CAGCATTGTACAGGGCTATGC      | miRNA | miR-103a    |
| t0086451 | 20 | 1 AAGAAGCATTGTACAGGGCT       | miRNA | miR-103a    |
| t0087536 | 24 | 1 AGCAGCATTGTACAGTGCTATGAA   | miRNA | miR-103a    |
| t0049941 | 22 | 1 AGCAGTATTGTGCAGGGCTATG     | miRNA | miR-103a    |
| t0073578 | 22 | 1 CAGGAGCATTGTACAGGGCTAT     | miRNA | miR-103a    |
| t0080303 | 22 | 1 AGCAGCATTTTACAGAGCTATG     | miRNA | miR-103a    |
| t0040751 | 25 | 1 AGCACCATTGTACAGGGCTATGAAA  | miRNA | miR-103a    |
| t0041145 | 24 | 1 AGCAGCATTGTACAGGGCTAAGAA   | miRNA | miR-103a    |
| t0041931 | 22 | 1 CGCAGCATTGTAAAGGGCTATG     | miRNA | miR-103a    |
| t0042340 | 21 | 1 CAGCATTGTACAGGCCTATGA      | miRNA | miR-103a    |
| t0042573 | 20 | 1 AGCAGCATTGTAAAGGGCTC       | miRNA | miR-103a    |
| t0042660 | 22 | 1 GCAGCATTGTACAGGGATATGT     | miRNA | miR-103a    |
| t0043794 | 21 | 1 AGCAGCATTGTATAGGGTTAT      | miRNA | miR-103a    |
| t0044437 | 19 | 1 AGCAGAATTGTACAGGGCT        | miRNA | miR-103a    |
| t0045149 | 22 | 1 AGCAGCATTGTAGAGGGATATG     | miRNA | miR-103a    |
| t0045197 | 21 | 1 AGCACCATTGTACAAGGCTAT      | miRNA | miR-103a    |
| t0045798 | 19 | 1 AGCAGCATTGTACAGGGGT        | miRNA | miR-103a    |
| t0046028 | 23 | 1 ACCAGCATTGTGCAGGGCTATGA    | miRNA | miR-103a    |
| t0046756 | 22 | 1 AGAAGCAATGTACAGGGCTATG     | miRNA | miR-103a    |
| t0047425 | 19 | 1 AGCAGGATTGTACAGGGCT        | miRNA | miR-103a    |
| t0047724 | 23 | 1 AGCAGCATTGTACAGGGCTGTGT    | miRNA | miR-103a    |
| t0047889 | 20 | 1 AGCAGCATTGCACATGGCTA       | miRNA | miR-103a    |
| t0048479 | 22 | 1 AGCAGCATTGTACAGCCCTATG     | miRNA | miR-103a    |
| t0049001 | 18 | 1 AGCAGCATTGTATAGGGC         | miRNA | miR-103a    |
| t0049024 | 23 | 1 AGCAGTATTGTACAGGGCTATGC    | miRNA | miR-103a    |
| t0049573 | 23 | 1 AGCAGCATTGTACCTGGCTATGA    | miRNA | miR-103a    |
| t0050391 | 23 | 1 GGCAGCATTGTACAGGGCTATGT    | miRNA | miR-103a    |
| t0050433 | 19 | 1 AGCAGCATTGTACCGGGCT        | miRNA | miR-103a    |
| t0050530 | 20 | 1 AGCAGCATTGTACACGGCTC       | miRNA | miR-103a    |
| t0051198 | 21 | 1 AGCAGCTTTGTACCGGGCTAT      | miRNA | miR-103a    |
| t0051578 | 23 | 1 AGCAGAATTGTAAAGGGCTATGA    | miRNA | miR-103a    |
| t0051735 | 23 | 1 GGCAGCATTATACAGGGCTATGA    | miRNA | miR-103a    |
| t0051840 | 21 | 1 AGCAGTATTGTACCGGGCTAT      | miRNA | miR-103a    |
| t0052427 | 23 | 1 AGCAGCATTGTACGGGGCTATGT    | miRNA | miR-103a    |
| t0052511 | 23 | 1 AGCAGCATTGAAAAGGGCTATGA    | miRNA | miR-103a    |
| t0052520 | 24 | 1 AGCAGCATTGTATAGGGCTATGAA   | miRNA | miR-103a    |
| t0053122 | 24 | 1 AGCAGGATTGTACAGGGCTATGAT   | miRNA | miR-103a    |
| t0053355 | 24 | 1 AACAGCATTGTACAGGGCTATGAG   | miRNA | miR-103a    |
| t0053547 | 22 | 1 GCAGCACTGTACAGGGCTATGA     | miRNA | miR-103a    |

|          |    |                                 |       |          |
|----------|----|---------------------------------|-------|----------|
| t0053886 | 21 | 1 AGCAGAATTGTACAGGGCTAA         | miRNA | miR-103a |
| t0054525 | 23 | 1 ACCAGCATTGTACAGGGCTATGT       | miRNA | miR-103a |
| t0055120 | 19 | 1 AGCAGCATTGTACAGGGCG           | miRNA | miR-103a |
| t0055249 | 24 | 1 AGCAGAATTGCACAGGGCTATGAA      | miRNA | miR-103a |
| t0055408 | 22 | 1 AACAGCATTGTACAGGGCTACG        | miRNA | miR-103a |
| t0055938 | 18 | 1 AGCAGCCTTGTACAGGGC            | miRNA | miR-103a |
| t0056060 | 18 | 1 AGCAGCATTGTACAGGGA            | miRNA | miR-103a |
| t0056220 | 24 | 1 AAAGCAGCATTGTACAGGGCTCTG      | miRNA | miR-103a |
| t0056375 | 23 | 1 AGCAGCATTGTACAGGGCGATGA       | miRNA | miR-103a |
| t0056443 | 23 | 1 AGCAGCAGTGTACAGGGCTAGGA       | miRNA | miR-103a |
| t0056820 | 21 | 1 CAGCATTGTATAGGGCTATGA         | miRNA | miR-103a |
| t0056961 | 21 | 1 AAGCAGCCTTGTACAGGGCTA         | miRNA | miR-103a |
| t0057124 | 21 | 1 AGCAGCATTGTACAGGGTTAA         | miRNA | miR-103a |
| t0057707 | 22 | 1 TGCAGCATTGTACATGGCTATG        | miRNA | miR-103a |
| t0057724 | 23 | 1 AGCAGCATTGCACAGTGCTATGA       | miRNA | miR-103a |
| t0058272 | 23 | 1 AGCACCATTGTACAGGGCCATGA       | miRNA | miR-103a |
| t0058771 | 22 | 1 AGCAACATTGTACAGGGTTATG        | miRNA | miR-103a |
| t0059011 | 22 | 1 AGCAGCATTGTACAAGGATATG        | miRNA | miR-103a |
| t0059308 | 23 | 1 AGCAGCATTGTACATGGCTCTGA       | miRNA | miR-103a |
| t0059560 | 23 | 1 AGCAGCATTGTACAGGACTATGT       | miRNA | miR-103a |
| t0060069 | 21 | 1 AGCAGCATTGGACAGGGCTAA         | miRNA | miR-103a |
| t0061654 | 23 | 1 TAGCAGCATTGTACAGGGCTATG       | miRNA | miR-103a |
| t0061821 | 21 | 1 AGCAGCATAGTACAGGGCTAT         | miRNA | miR-103a |
| t0062072 | 20 | 1 CAGCATTGTACAGGCCTATG          | miRNA | miR-103a |
| t0062288 | 24 | 1 AGCAGCATTGCACAGGGCTATGAT      | miRNA | miR-103a |
| t0062724 | 23 | 1 AGCAGCATTGTACAAGGCTATGT       | miRNA | miR-103a |
| t0062848 | 22 | 1 AGCAGAATTGTACAGGGATATG        | miRNA | miR-103a |
| t0063667 | 21 | 1 AGCAGCATCGTACAGGGCTAG         | miRNA | miR-103a |
| t0063966 | 37 | 1 AGCAGCATTGTACAGGGCTATGACATACT | miRNA | miR-103a |
| t0064764 | 19 | 1 AGCAGCATTGTACAAGGCT           | miRNA | miR-103a |
| t0064882 | 24 | 1 AGCAGCATTGTACAGGGATATGAA      | miRNA | miR-103a |
| t0065280 | 23 | 1 AGCAGCATTGGACAGGGCTATGT       | miRNA | miR-103a |
| t0065337 | 25 | 1 AAGCAGCATTGTACAGGGATATGAA     | miRNA | miR-103a |
| t0065409 | 24 | 1 AGCAGAATTGTACAGGGCTATGAA      | miRNA | miR-103a |
| t0065860 | 22 | 1 AGAAGTATTGTACAGGGCTATG        | miRNA | miR-103a |
| t0067096 | 24 | 1 AGCAGCATTGTACAGGGCTCTGAA      | miRNA | miR-103a |
| t0067473 | 19 | 1 AGCAGCATTATACAGGGCT           | miRNA | miR-103a |
| t0067861 | 21 | 1 AGCAGCATTGTAACGGGCTAT         | miRNA | miR-103a |
| t0068983 | 23 | 1 AGCAGCATTGTACAGGGCTCTGT       | miRNA | miR-103a |
| t0068994 | 22 | 1 AGCAGCATTCTGCAGGGCTATG        | miRNA | miR-103a |
| t0069097 | 22 | 1 GCAGTATTGTACAGGGCTATGA        | miRNA | miR-103a |
| t0069443 | 18 | 1 AGCAGCATTGTCCAGGGC            | miRNA | miR-103a |
| t0069493 | 23 | 1 AACAGCATTCTACAGGGCTATGA       | miRNA | miR-103a |
| t0069972 | 24 | 1 AGCAGCATTGTACACGGCTATGAA      | miRNA | miR-103a |
| t0070376 | 21 | 1 AGCAGCATTGTAAAGGGCTAA         | miRNA | miR-103a |
| t0070725 | 23 | 1 AGAAGCATTGTACAGGCCTATGA       | miRNA | miR-103a |
| t0070857 | 22 | 1 AGCAGCATTGAACGGGCTATG         | miRNA | miR-103a |
| t0072012 | 22 | 1 AGCAGAATTGTACAAGGCTATG        | miRNA | miR-103a |
| t0072400 | 24 | 1 AGCAGCATTGTACGGGGCTATGAA      | miRNA | miR-103a |
| t0072489 | 23 | 1 AGCAGCATTGTACAGGCCTATGT       | miRNA | miR-103a |
| t0072612 | 23 | 1 AACAGCATTGTACAGGGCTATGT       | miRNA | miR-103a |
| t0072652 | 21 | 1 AGCAGCATTGAACAGGACTAT         | miRNA | miR-103a |
| t0073123 | 23 | 1 AGCAGCATTTTACAGGGCTATGT       | miRNA | miR-103a |
| t0073191 | 23 | 1 AGCAGCATTGAACAGGGCTATGT       | miRNA | miR-103a |
| t0073200 | 23 | 1 AGCAGCATTGTTACAGGGCTATGA      | miRNA | miR-103a |
| t0073393 | 20 | 1 AGCAGCATAGTACAGGGCTA          | miRNA | miR-103a |
| t0073563 | 22 | 1 AGCAGCAGTGTACAGGGCTATG        | miRNA | miR-103a |
| t0073698 | 25 | 1 AGCAACATTGTACAGGGCTATGAGC     | miRNA | miR-103a |

|          |    |                                 |       |          |
|----------|----|---------------------------------|-------|----------|
| t0074409 | 23 | 1 AAGCAGCATTGTACAGAGCTATG       | miRNA | miR-103a |
| t0074661 | 26 | 1 AGCAGCATTGTACCGGGCTATGAATC    | miRNA | miR-103a |
| t0075017 | 35 | 1 AGCAGCATTGTACAGGGCTATGAAACTCT | miRNA | miR-103a |
| t0075340 | 21 | 1 AAGCAGCATTATACAGGGCTA         | miRNA | miR-103a |
| t0075375 | 21 | 1 CAGCATTGCACAGGGCTATGA         | miRNA | miR-103a |
| t0075407 | 19 | 1 AGCAGCATTGTAAAGGGCA           | miRNA | miR-103a |
| t0075456 | 22 | 1 AGAAGCATTGTACAGGGATATG        | miRNA | miR-103a |
| t0077437 | 23 | 1 AGAAGCATTGGACAGGGCTATGA       | miRNA | miR-103a |
| t0077705 | 24 | 1 AGCAGCATTGTACAGGGCCATGAT      | miRNA | miR-103a |
| t0077828 | 21 | 1 AAGAAGCATTGTACAGGGCTA         | miRNA | miR-103a |
| t0078236 | 21 | 1 AGCAGCACTGTACAGGGCTAG         | miRNA | miR-103a |
| t0078424 | 23 | 1 AGCAGCATTCTACAGGGCTATGT       | miRNA | miR-103a |
| t0078680 | 19 | 1 AGCAGCATTGTACAGCGCT           | miRNA | miR-103a |
| t0078958 | 21 | 1 AGCAGCATTGAACAGGGATAT         | miRNA | miR-103a |
| t0079515 | 20 | 1 AGCAGCATTGTACAGGGCGA          | miRNA | miR-103a |
| t0079701 | 23 | 1 AGCAGCCTTGTCCAGGGCTATGA       | miRNA | miR-103a |
| t0080255 | 21 | 1 AGCAGCATGGTACAGGGCTAT         | miRNA | miR-103a |
| t0080907 | 22 | 1 AGCAGCATTGTACACGGATATG        | miRNA | miR-103a |
| t0081441 | 22 | 1 AGCCGCATTGTCCAGGGCTATG        | miRNA | miR-103a |
| t0081749 | 21 | 1 AGCAGCATTGTCCAGGGATAT         | miRNA | miR-103a |
| t0081845 | 21 | 1 AGCAGCATTGTACAGGGCAAT         | miRNA | miR-103a |
| t0081885 | 22 | 1 AGAAGCTTTGTACAGGGCTATG        | miRNA | miR-103a |
| t0082211 | 23 | 1 AGCAGCATTGTACAGGGGTATGT       | miRNA | miR-103a |
| t0082451 | 22 | 1 AGCAGCATTCTACAGGGTTATG        | miRNA | miR-103a |
| t0082552 | 24 | 1 CGCAGCATTGTACAGGGCTATGAA      | miRNA | miR-103a |
| t0082636 | 20 | 1 AGCAGTAATGTACAGGGCTA          | miRNA | miR-103a |
| t0082729 | 22 | 1 AGAAGCATTGGACAGGGCTATG        | miRNA | miR-103a |
| t0083043 | 21 | 1 AGCAGCATTGTACAGTGCTGT         | miRNA | miR-103a |
| t0084177 | 23 | 1 AGCAGCATTGTACAGGGCCATGT       | miRNA | miR-103a |
| t0084704 | 24 | 1 AGCAGCATCGTACAGGGCTATGTA      | miRNA | miR-103a |
| t0085078 | 23 | 1 AGCAGCATTGGACATGGCTATGA       | miRNA | miR-103a |
| t0085687 | 24 | 1 AGCAGCGTTGTACAGGGCTATGAA      | miRNA | miR-103a |
| t0086365 | 24 | 1 AGCAGCATTGTACAGGACTATGAT      | miRNA | miR-103a |
| t0086873 | 20 | 1 AGCAGCATTGTACAGGCCTA          | miRNA | miR-103a |
| t0086879 | 22 | 1 AGCAGCATTGTACCGTGCTATG        | miRNA | miR-103a |
| t0087223 | 18 | 1 AGCAGCATTGTAAAGGGC            | miRNA | miR-103a |
| t0087360 | 22 | 1 CAGCAGCATTGTACAGGGCTAT        | miRNA | miR-103a |
| t0087394 | 21 | 1 AGCAGCATCGGACAGGGCTAT         | miRNA | miR-103a |
| t0087791 | 24 | 1 AAAGCAGCATTGTACAGGGATATG      | miRNA | miR-103a |
| t0088083 | 22 | 1 AACAGCATTGCACAGGGCTATG        | miRNA | miR-103a |
| t0088208 | 21 | 1 TAGAGTACTGTGATAACTGAT         | miRNA | miR-101c |
| t0088269 | 22 | 1 CACAGTACTGTGATAACTGAAG        | miRNA | miR-101c |
| t0089637 | 21 | 1 TACAGTACTGGGATAACTGAT         | miRNA | miR-101c |
| t0089745 | 19 | 1 CACAGTACTGTGATAACTG           | miRNA | miR-101c |
| t0090435 | 22 | 1 GGACAGTACTGGGATAACTGAA        | miRNA | miR-101c |
| t0090458 | 22 | 1 TACGGTACTGTGATAACTGACA        | miRNA | miR-101c |
| t0090950 | 22 | 1 TACAGAAGTGTGATAACTGATT        | miRNA | miR-101c |
| t0091261 | 22 | 1 GAAAAGTACTGTGATAACTGAA        | miRNA | miR-101c |
| t0091737 | 22 | 1 CACAGTACTGTGATAACTGAAT        | miRNA | miR-101c |
| t0092872 | 19 | 1 CAGTACTGTGGTAACTGAA           | miRNA | miR-101c |
| t0093153 | 22 | 1 GTACGGTACTGTGATAACTGAG        | miRNA | miR-101c |
| t0093510 | 22 | 1 TACAGTACTCTGATAACTGACT        | miRNA | miR-101c |
| t0093556 | 19 | 1 CAGGACTGTGATAACTGAA           | miRNA | miR-101c |
| t0040802 | 22 | 1 TAGAGTACTGTGATAACTGATT        | miRNA | miR-101c |
| t0042152 | 22 | 1 GTACAGTAATGTGATAACTGAT        | miRNA | miR-101c |
| t0042249 | 22 | 1 TACAGTACTGTGGTAACTGACT        | miRNA | miR-101c |
| t0044285 | 22 | 1 TACAGTACTGTGATAACTGAGG        | miRNA | miR-101c |
| t0044708 | 22 | 1 GACAGTACTGTGATAACTGATA        | miRNA | miR-101c |

|          |    |                               |       |          |
|----------|----|-------------------------------|-------|----------|
| t0045198 | 22 | 1 TAGAGTACTGTGATAACTGATA      | miRNA | miR-101c |
| t0046003 | 19 | 1 CAGTACTGTGATAACGGAA         | miRNA | miR-101c |
| t0046240 | 22 | 1 TACAGTACTGTGATCACTGACT      | miRNA | miR-101c |
| t0046895 | 19 | 1 CAGTACTGGGATAACTGAA         | miRNA | miR-101c |
| t0047041 | 22 | 1 GGACAGTACTGTGATAACTGAT      | miRNA | miR-101c |
| t0047291 | 22 | 1 GTACAGAACTGTGATAACTGAC      | miRNA | miR-101c |
| t0047896 | 22 | 1 TACAGTACTGCGATAACTGACT      | miRNA | miR-101c |
| t0048796 | 22 | 1 TACAGTCTGTGATAACTGACT       | miRNA | miR-101c |
| t0049138 | 22 | 1 TACAGTACTGTAATAACTGACC      | miRNA | miR-101c |
| t0049546 | 22 | 1 GTACAGTACTGTGATAAATGAT      | miRNA | miR-101c |
| t0050104 | 21 | 1 AAAGTACTGTGATAACTGAAG       | miRNA | miR-101c |
| t0050354 | 21 | 1 TACAGTACTGTGATAAATGAT       | miRNA | miR-101c |
| t0050466 | 22 | 1 TACAGTACTGTTATAACTGATA      | miRNA | miR-101c |
| t0051588 | 22 | 1 TACAGGACTGTGATAACTGACT      | miRNA | miR-101c |
| t0054648 | 21 | 1 GACAGTACTGTGATAACTGAA       | miRNA | miR-101c |
| t0054793 | 21 | 1 TACAGTACTGTGTTAACTGAT       | miRNA | miR-101c |
| t0055370 | 19 | 1 CAGTCTGTGATAACTGAA          | miRNA | miR-101c |
| t0055429 | 22 | 1 GTACAGTACTGTTATAACTGAC      | miRNA | miR-101c |
| t0057023 | 21 | 1 TACAGTACTGTGATCACTGAT       | miRNA | miR-101c |
| t0058652 | 22 | 1 TGCAGTACTGTGATAACTGATA      | miRNA | miR-101c |
| t0063925 | 25 | 1 TACAGTACTGTGATAACTGACTATT   | miRNA | miR-101c |
| t0064009 | 19 | 1 CAGCACTGTGATAACTGAA         | miRNA | miR-101c |
| t0064157 | 25 | 1 TACAGTACTGTGATAGCTGACGATC   | miRNA | miR-101c |
| t0064589 | 19 | 1 CAGTACTGTGATAAATGAA         | miRNA | miR-101c |
| t0065335 | 21 | 1 TACAGTACTGTGGTAACTGAT       | miRNA | miR-101c |
| t0065382 | 22 | 1 GAACAGTAATGTGATAACTGAA      | miRNA | miR-101c |
| t0066254 | 22 | 1 TACAGTACTGTGATAACTGCTT      | miRNA | miR-101c |
| t0067107 | 21 | 1 TACAGTATTGTGATAACTGAC       | miRNA | miR-101c |
| t0068051 | 22 | 1 TACAGTACTGTGATAACTGCCT      | miRNA | miR-101c |
| t0069973 | 21 | 1 TACAGTGTGTGATAACTGAT        | miRNA | miR-101c |
| t0071507 | 22 | 1 GTACAGTACTGTGATAACTGCT      | miRNA | miR-101c |
| t0072941 | 26 | 1 GTACAGTACTGTGATAACTGACCCCA  | miRNA | miR-101c |
| t0072975 | 22 | 1 GTACAGGACTGTGATAACTGAT      | miRNA | miR-101c |
| t0073624 | 22 | 1 TACAGTATTGTGATAACTGACT      | miRNA | miR-101c |
| t0075219 | 22 | 1 GTACAGTACTGTGATACCTGAT      | miRNA | miR-101c |
| t0076387 | 21 | 1 TACAGTACTGTGATAACTGCT       | miRNA | miR-101c |
| t0077209 | 22 | 1 TACAGTACTGTGATAACTAACT      | miRNA | miR-101c |
| t0077667 | 19 | 1 CAGTACTGCGATAACTGAA         | miRNA | miR-101c |
| t0078289 | 22 | 1 GTACAGTCTGTGATAACTGAC       | miRNA | miR-101c |
| t0078713 | 19 | 1 ACAGCACTGTGATAACTGA         | miRNA | miR-101c |
| t0079407 | 22 | 1 TACAGTACTGTGATAACCGACT      | miRNA | miR-101c |
| t0079920 | 21 | 1 ACAGTACTATGATAACTGAAG       | miRNA | miR-101b |
| t0080516 | 20 | 1 TACAGTATTATGATAACTGA        | miRNA | miR-101b |
| t0080897 | 22 | 1 GTACAGTACTATGATAACTGAG      | miRNA | miR-101b |
| t0081180 | 22 | 1 GTACAGTACTATGATAAGTGAA      | miRNA | miR-101b |
| t0081405 | 22 | 1 TACAGTAATGTGATAACTGAAT      | miRNA | miR-101  |
| t0082250 | 21 | 1 TATAGTACTGTGATTACTGAA       | miRNA | miR-101  |
| t0082548 | 21 | 1 GTACAGTACTTTGATAACTGC       | miRNA | miR-101  |
| t0083674 | 27 | 1 TACAGTACTGTGATAGCTGAAGAAATC | miRNA | miR-101  |
| t0084123 | 23 | 1 TACAGTACTGTAATAACTGAAGA     | miRNA | miR-101  |
| t0084168 | 22 | 1 TACAGTAATGTGATAACTGAAG      | miRNA | miR-101  |
| t0087889 | 23 | 1 TACAGTACTGTGATAACGGAAGA     | miRNA | miR-101  |
| t0091121 | 22 | 1 TACAGTACTGTGTTAACTGAAA      | miRNA | miR-101  |
| t0093109 | 22 | 1 TACAGTACTGTGAGAACTGAAG      | miRNA | miR-101  |
| t0045614 | 22 | 1 TCCAGTACTGTGATAACTGAAA      | miRNA | miR-101  |
| t0065393 | 22 | 1 TACAGTACTGTGATAACAGAAG      | miRNA | miR-101  |
| t0081819 | 19 | 1 TATAGTACTGTGATAACTG         | miRNA | miR-101  |
| t0091701 | 27 | 1 GTACAGTACTGTGATAACTGAATCGGC | miRNA | miR-101  |

|          |    |                                 |       |         |
|----------|----|---------------------------------|-------|---------|
| t0041140 | 19 | 1 TCCAGTACTGTGATAACTG           | miRNA | miR-101 |
| t0041593 | 26 | 1 TACAGTACTGTGATAGCTGAAGTATC    | miRNA | miR-101 |
| t0041663 | 29 | 1 GTACAGTACTGTGCTAACTGAACTCTGAA | miRNA | miR-101 |
| t0042106 | 22 | 1 TACAGTACTGCGATAACTGTAG        | miRNA | miR-101 |
| t0043493 | 22 | 1 GTACAGTACTGTGAAAAGTAACTGAA    | miRNA | miR-101 |
| t0044077 | 23 | 1 GTACAGTACTGTGACAAGTAACTGAAA   | miRNA | miR-101 |
| t0045788 | 21 | 1 GTACAGTACTGTGATATCTGA         | miRNA | miR-101 |
| t0045916 | 27 | 1 TACGGTACTGTGATAACTGAAGAGGGA   | miRNA | miR-101 |
| t0047226 | 21 | 1 TTACAGTACTGTGATAACTGA         | miRNA | miR-101 |
| t0048137 | 21 | 1 GTACACTACTGTGATAACTGA         | miRNA | miR-101 |
| t0048210 | 21 | 1 TACAGTTCTGTGATAACTGAA         | miRNA | miR-101 |
| t0048627 | 23 | 1 TCGTACAGTACTGTGATAACTGA       | miRNA | miR-101 |
| t0048747 | 23 | 1 TACAGTACTGTGGTAACTGAAGA       | miRNA | miR-101 |
| t0049405 | 19 | 1 TACAGGACTGTGATAACTG           | miRNA | miR-101 |
| t0049477 | 42 | 1 GTACAGTACTGTGATAACTGAACCGGCTC | miRNA | miR-101 |
| t0050040 | 21 | 1 TACAGTAATGTGATAAATGAA         | miRNA | miR-101 |
| t0051160 | 22 | 1 TACAGTACTGTGATAACTAAAT        | miRNA | miR-101 |
| t0051876 | 21 | 1 TACAGTAATGTGATAATTGAA         | miRNA | miR-101 |
| t0052321 | 22 | 1 TACAGTACTGTGATCACTGAAG        | miRNA | miR-101 |
| t0053277 | 21 | 1 TAAAGTACTGTGATAAATGAA         | miRNA | miR-101 |
| t0053278 | 20 | 1 TACAGTACTGTGATAAGTGA          | miRNA | miR-101 |
| t0053812 | 21 | 1 TACAGTACTGTGATAACTGTA         | miRNA | miR-101 |
| t0053894 | 20 | 1 TACAGTACTGTGATACCTGA          | miRNA | miR-101 |
| t0054088 | 23 | 1 GTACAGTACTGTGGTAACTGAAT       | miRNA | miR-101 |
| t0054341 | 22 | 1 GTACAGTACTGTGATTACTGAA        | miRNA | miR-101 |
| t0054578 | 20 | 1 TACAGTACTGTGATAACAGA          | miRNA | miR-101 |
| t0055170 | 21 | 1 TACAGGACTGGGATAACTGAA         | miRNA | miR-101 |
| t0055562 | 22 | 1 GTACAGTACTGTGAGAAGTAACTGAA    | miRNA | miR-101 |
| t0055642 | 22 | 1 TACAGTACTGTGATGACTGAAG        | miRNA | miR-101 |
| t0056005 | 22 | 1 GTACAGTACTGTGATAAATGCA        | miRNA | miR-101 |
| t0056187 | 21 | 1 TACAGTACTGTGATGAATGAA         | miRNA | miR-101 |
| t0057246 | 22 | 1 GTAGAGTACTGTGATAACTGAA        | miRNA | miR-101 |
| t0057461 | 22 | 1 TACAGTACTGTGGTAACTGAAA        | miRNA | miR-101 |
| t0057940 | 23 | 1 GTACACTACTGTGATAACTGAAA       | miRNA | miR-101 |
| t0057984 | 22 | 1 TGCAGTACTGTGATAACTGAAA        | miRNA | miR-101 |
| t0058934 | 21 | 1 GTACAGTACAGTATAACTGA          | miRNA | miR-101 |
| t0059551 | 21 | 1 TACAGTAATGCGATAACTGAA         | miRNA | miR-101 |
| t0059844 | 22 | 1 TACAGTACTGTGATAACTGGAG        | miRNA | miR-101 |
| t0059950 | 23 | 1 GTACAGTACCGTGATAACTGAAA       | miRNA | miR-101 |
| t0061744 | 21 | 1 GTACAGTACTGTGCTAACTGA         | miRNA | miR-101 |
| t0062626 | 21 | 1 TAAAGTACTGTGATCACTGAA         | miRNA | miR-101 |
| t0063318 | 25 | 1 TACAGTACTGTCATAGCTGAAGATC     | miRNA | miR-101 |
| t0063650 | 21 | 1 GTACATTACTGTGATAACTGA         | miRNA | miR-101 |
| t0063744 | 21 | 1 GTACAGTACTGTGATAAGTGA         | miRNA | miR-101 |
| t0063763 | 22 | 1 TACAGTACTGTGTTAACTGAAG        | miRNA | miR-101 |
| t0063892 | 26 | 1 TACAGTACTGTGATAACTGAATCCAA    | miRNA | miR-101 |
| t0063949 | 27 | 1 TACAGTACTGTGTTAACTGAACACGGC   | miRNA | miR-101 |
| t0064088 | 22 | 1 TACAGTACTGTGAAAAGTAACTGAAT    | miRNA | miR-101 |
| t0064730 | 22 | 1 TACAGTAATGTGATAACTCAAG        | miRNA | miR-101 |
| t0064741 | 21 | 1 TACAGTACAGTATAACTGAA          | miRNA | miR-101 |
| t0065049 | 22 | 1 TGCAGTACTGTTATAACTGAAG        | miRNA | miR-101 |
| t0065348 | 22 | 1 TACAGGACTGTGATAACTGAAA        | miRNA | miR-101 |
| t0066066 | 23 | 1 GTACAGTACTGGGATAACTGAAC       | miRNA | miR-101 |
| t0066307 | 22 | 1 TACAGTACTGTGGTAACTGAAG        | miRNA | miR-101 |
| t0066410 | 22 | 1 TAAAGTACTGTGATAACTGAAA        | miRNA | miR-101 |
| t0066468 | 21 | 1 GTCCAGTACTGTGATAACTGA         | miRNA | miR-101 |
| t0066578 | 21 | 1 TGCAGTACTGTGATACCTGAA         | miRNA | miR-101 |
| t0066858 | 22 | 1 TACACTACTGTGATAACTGAAA        | miRNA | miR-101 |



|          |    |                                 |       |         |
|----------|----|---------------------------------|-------|---------|
| t0066864 | 22 | 1 TACAGAACTGTGATAACTGAAG        | miRNA | miR-101 |
| t0066949 | 22 | 1 TACAGGACTGTGATAACTGAAG        | miRNA | miR-101 |
| t0067101 | 22 | 1 GTACAGTTCTGTGATAACTGAA        | miRNA | miR-101 |
| t0067168 | 22 | 1 TACAGTACTGTGATATCTGAAG        | miRNA | miR-101 |
| t0068171 | 22 | 1 TACAGTACGGTGATAACTGAAG        | miRNA | miR-101 |
| t0068329 | 22 | 1 TACAGTACTGTGATACCTGAAG        | miRNA | miR-101 |
| t0068924 | 21 | 1 GTACAGTACTGTGATAACAGA         | miRNA | miR-101 |
| t0069167 | 25 | 1 TACAGTACTGTGATAACTGAATATC     | miRNA | miR-101 |
| t0069546 | 22 | 1 TACAGTACTGTAATAACTGAAA        | miRNA | miR-101 |
| t0069779 | 22 | 1 GTACAGTACTGTCATAACTGAA        | miRNA | miR-101 |
| t0070936 | 22 | 1 TACAGTCCCTGTGATAACTGAAG       | miRNA | miR-101 |
| t0072204 | 22 | 1 GTACAGTACTTTTGATAACTGAA       | miRNA | miR-101 |
| t0072216 | 22 | 1 TACAGTACTGTGATAACTGGAT        | miRNA | miR-101 |
| t0072382 | 20 | 1 TACAGTACTGTTATAACTGA          | miRNA | miR-101 |
| t0072613 | 25 | 1 TACGGTACTGTGATAACTGAAGTCC     | miRNA | miR-101 |
| t0072810 | 25 | 1 TACAGTACTGTGATAACTGAAGGCC     | miRNA | miR-101 |
| t0073579 | 21 | 1 GTTCAGTACTGTGATAACTGA         | miRNA | miR-101 |
| t0074115 | 22 | 1 TACAGTACTGTGCTAACTGAAT        | miRNA | miR-101 |
| t0074646 | 20 | 1 TAAAGTACTGTGATAAATGA          | miRNA | miR-101 |
| t0074826 | 23 | 1 GTACAGAACTGTGATAACTGAAA       | miRNA | miR-101 |
| t0076308 | 22 | 1 GTACAGTACTGTGATAACGGAA        | miRNA | miR-101 |
| t0077338 | 22 | 1 TACAGTACTGTGATAACTAAAA        | miRNA | miR-101 |
| t0077720 | 22 | 1 TACGTTACTGTGATAACTGAAG        | miRNA | miR-101 |
| t0077846 | 22 | 1 TACAGTACTGTCATAACTGAAG        | miRNA | miR-101 |
| t0078037 | 21 | 1 GTACAGTACTGTGATAACCGA         | miRNA | miR-101 |
| t0078046 | 23 | 1 TACAGTACTGGGATAACTGAAGA       | miRNA | miR-101 |
| t0078510 | 21 | 1 GTACAGTACTGTAATAACTGA         | miRNA | miR-101 |
| t0078771 | 23 | 1 TGCAGTACTGTGATAACTGAATA       | miRNA | miR-101 |
| t0079173 | 28 | 1 TACAGTACTGTGATAACTGAAACAAGCA  | miRNA | miR-101 |
| t0079355 | 22 | 1 TACAGTACTGCGATAACTGAAT        | miRNA | miR-101 |
| t0079618 | 22 | 1 TAAAGTACTGTGATAACTGAAT        | miRNA | miR-101 |
| t0079704 | 22 | 1 TACCGTACTGTGATAACTGAAG        | miRNA | miR-101 |
| t0080130 | 22 | 1 TACAGTACTGTGATAAATCAAG        | miRNA | miR-101 |
| t0080615 | 20 | 1 TTCAGTACTGTGATAACTGA          | miRNA | miR-101 |
| t0080695 | 21 | 1 GTACAGTACTGTGAAAACTGA         | miRNA | miR-101 |
| t0081468 | 22 | 1 TACAGTATTGTGATAAATGAAA        | miRNA | miR-101 |
| t0081814 | 23 | 1 TACAGTACCGTGATAACTGAAGA       | miRNA | miR-101 |
| t0082068 | 22 | 1 TACAGTACTGCGATAACTGAAA        | miRNA | miR-101 |
| t0082214 | 21 | 1 TCCAGTACTGTGCTAACTGAA         | miRNA | miR-101 |
| t0082248 | 21 | 1 GTECTGTACTGTGATAACTGA         | miRNA | miR-101 |
| t0082364 | 22 | 1 TACAGTGCTGTGATAACTGAAT        | miRNA | miR-101 |
| t0082406 | 20 | 1 TACAGTACTCTGATAACTGA          | miRNA | miR-101 |
| t0082412 | 22 | 1 TACAGTAATGTGATAACTGAAA        | miRNA | miR-101 |
| t0082444 | 22 | 1 TACAGCACTGTGATAACTGAAT        | miRNA | miR-101 |
| t0082883 | 22 | 1 TCCAGTACTGTGATAACTGAAG        | miRNA | miR-101 |
| t0083168 | 20 | 1 TACAGTACTGTGATAACCGA          | miRNA | miR-101 |
| t0083178 | 21 | 1 TACAGTACTCTGATAACTGAA         | miRNA | miR-101 |
| t0083518 | 25 | 1 TACAGTACTGTGATAGCTGAAGATT     | miRNA | miR-101 |
| t0083765 | 22 | 1 TACAGTACTGTGATAACCGAAG        | miRNA | miR-101 |
| t0083866 | 20 | 1 GTACAGCACTGTGATAACTG          | miRNA | miR-101 |
| t0085292 | 22 | 1 TACAGTACTGAGATAACTGAAT        | miRNA | miR-101 |
| t0085648 | 20 | 1 TACATTAATGTGATAACTGA          | miRNA | miR-101 |
| t0085651 | 21 | 1 GTAGAGTACTGTGATAACTGA         | miRNA | miR-101 |
| t0086411 | 21 | 1 TACAGCACTGGGATAACTGAA         | miRNA | miR-101 |
| t0086659 | 20 | 1 TACAGTACTGTGATAACTGT          | miRNA | miR-101 |
| t0086683 | 42 | 1 GTACAGTACTGTGATAACTGAACCGGCTC | miRNA | miR-101 |
| t0086839 | 19 | 1 TACATTACTGTGATAACTG           | miRNA | miR-101 |
| t0087350 | 21 | 1 TACGGTATTGTGATAACTGAA         | miRNA | miR-101 |

|          |    |                                 |       |         |
|----------|----|---------------------------------|-------|---------|
| t0087840 | 21 | 1 ATCCAGTACTGTGATAACTGA         | miRNA | miR-101 |
| t0088031 | 23 | 1 TACAGTACTGTGATGACTGAAGA       | miRNA | miR-101 |
| t0088151 | 20 | 1 TACAGTACTGTGAGAACTGA          | miRNA | miR-101 |
| t0088302 | 44 | 1 GTACAGTACTGTGATAACTGAATCGGCTC | miRNA | miR-101 |
| t0089322 | 24 | 1 AACCCGTAGATCCGAAC TTGTCTC     | miRNA | miR-100 |
| t0089790 | 24 | 1 TACCCTGTAGAACCGAATTTGTTC      | miRNA | miR-10  |
| t0089901 | 26 | 1 TACCTTGTAGATCCGAATTTGTGATC    | miRNA | miR-10  |
| t0090392 | 25 | 1 TACCCTGTAGATCCGAATTTGT TTC    | miRNA | miR-10  |
| t0090431 | 26 | 1 ACCCTGTAGAACCGAATTTGTGTATC    | miRNA | miR-10  |
| t0090442 | 26 | 1 TACCCTGTAGATCAGAATTTGTGATC    | miRNA | miR-10  |
| t0090897 | 25 | 1 TACCCTGTAGATCCGAATTTGTACC     | miRNA | miR-10  |
| t0090974 | 26 | 1 TACCCTGTAGATCCGAATTTGTGCTC    | miRNA | miR-10  |
| t0091027 | 25 | 1 TGGAATGTAAAGAAGTGTGGACATC     | miRNA | miR-1   |
| t0091417 | 25 | 1 TGGAATGTAAAGAAGCGTGTATATC     | miRNA | miR-1   |
| t0091799 | 23 | 1 TGGAATGTAAAGAAGTGTGTATA       | miRNA | miR-1   |
| t0093053 | 25 | 1 TGGAATGAAAAGAAGTGTGTACATC     | miRNA | miR-1   |
| t0093386 | 25 | 1 TGGAATGTAAAGAAGTGTGTACATA     | miRNA | miR-1   |
| t0078758 | 25 | 1 TGGAATGTAAAGAAGTGTGTATATA     | miRNA | miR-1   |
| t0053882 | 25 | 1 TGGAATGTAATGAAGTGTGTATATC     | miRNA | miR-1   |
| t0059636 | 25 | 1 TGGAATGTAAAGAAGTGTGCACATC     | miRNA | miR-1   |
| t0060179 | 25 | 1 TAGAATGTAAAGAAGTGTGTACATC     | miRNA | miR-1   |
| t0060828 | 25 | 1 TGGAATGTAAAGAAGTGGGTGTATC     | miRNA | miR-1   |
| t0064058 | 25 | 1 TGGAATGTAAAGACGTGTGTATATC     | miRNA | miR-1   |
| t0071032 | 25 | 1 TGGAATGTAAAGAAGTGTGTAATC      | miRNA | miR-1   |
| t0082505 | 25 | 1 TGGAATGTAAAGAAGTGTGTCTATC     | miRNA | miR-1   |
| t0042025 | 25 | 1 TGGAATGTAAAGGAGTGTGTACATC     | miRNA | miR-1   |
| t0043308 | 25 | 1 TGGAATGTAAAGAAGTGCCTACATC     | miRNA | miR-1   |
| t0046955 | 25 | 1 TGGAATGTAAAGAAGTGTGCATATC     | miRNA | miR-1   |
| t0047403 | 25 | 1 TGGAATGGAAAGAAGTGTGTATATC     | miRNA | miR-1   |
| t0052532 | 25 | 1 CGGAATGTAAAGAAGTGTGTACATC     | miRNA | miR-1   |
| t0058222 | 25 | 1 TGGAATGTAAAGAAGTGTGTACATT     | miRNA | miR-1   |
| t0062990 | 25 | 1 TGGAATGTAAAGAAGGGTGTATATC     | miRNA | miR-1   |
| t0064875 | 25 | 1 TGGAATGAAAAGAAGTGTGTATATC     | miRNA | miR-1   |
| t0065345 | 25 | 1 TGGAATGTAAAGAAGTGTGTATAAC     | miRNA | miR-1   |
| t0067939 | 25 | 1 TGAGGTAGTAGATTGAATTGTTATC     | miRNA | let-7k  |
| t0069301 | 18 | 1 TGAGGTAGTAGATTGAAG            | miRNA | let-7k  |
| t0070926 | 21 | 1 TAGGTAGTAGATTGAATAGTT         | miRNA | let-7k  |
| t0074455 | 18 | 1 TGAGGTAGTAGATTGAAT            | miRNA | let-7k  |
| t0078031 | 22 | 1 TGAGGTACTAGATTGAATAGTT        | miRNA | let-7k  |
| t0080391 | 21 | 1 GAGGTAGTAGATTGAATAGTT         | miRNA | let-7k  |
| t0081486 | 21 | 1 TGAGGTAGTAGATGGAATAGT         | miRNA | let-7k  |
| t0082588 | 22 | 1 TGAGCTAGTAGATTGAATAGTT        | miRNA | let-7k  |
| t0083778 | 20 | 1 TGAGGTAGTAGATTGAGTAG          | miRNA | let-7k  |
| t0084951 | 22 | 1 TGAGGTAGTAGATTGAATGGTT        | miRNA | let-7k  |
| t0085012 | 20 | 1 TGAGGTAGTAGATTGAACAG          | miRNA | let-7k  |
| t0090480 | 20 | 1 TGAGGTAGTAGATTGAATAA          | miRNA | let-7k  |
| t0091470 | 21 | 1 TGAGGTAGTAGATTGAATATT         | miRNA | let-7k  |
| t0042420 | 21 | 1 TGAGGTAGAAGATTGAATAGT         | miRNA | let-7k  |
| t0042633 | 21 | 1 AGAGGTAGTAGATTGAATAGT         | miRNA | let-7k  |
| t0043117 | 20 | 1 TGAGATAATAGATTGAATAG          | miRNA | let-7k  |
| t0044155 | 21 | 1 TGAGGTAGTAGATTGAATAGA         | miRNA | let-7k  |
| t0047474 | 23 | 1 TGAGGTAGTAGATTGAATAGTAA       | miRNA | let-7k  |
| t0048574 | 22 | 1 AGAGGTAGTAGATTGAATAGTT        | miRNA | let-7k  |
| t0049719 | 22 | 1 TGAGGTAGTAGATTGAGTAGTT        | miRNA | let-7k  |
| t0051227 | 20 | 1 TGAGGTAGTAGATTGAATTT          | miRNA | let-7k  |
| t0052683 | 23 | 1 TGAGGTAGAAGATTGAATAGTTG       | miRNA | let-7k  |
| t0052813 | 22 | 1 TGAGGTAGTAGATTGAATATTT        | miRNA | let-7k  |
| t0053582 | 22 | 1 TAAGGTAGTAGATTGAATAGTT        | miRNA | let-7k  |

|          |    |                             |       |        |
|----------|----|-----------------------------|-------|--------|
| t0055260 | 21 | 1 TGAGGTAATAGATTGAATAGT     | miRNA | let-7k |
| t0055879 | 20 | 1 GAGGTAGTAGATTGAATAGT      | miRNA | let-7k |
| t0057063 | 21 | 1 TGAGGTAGTAGAATGAATAGT     | miRNA | let-7k |
| t0057861 | 21 | 1 TGAGGTGGTAGATTGAATAGT     | miRNA | let-7k |
| t0059009 | 22 | 1 TGAGGTAGTAGATTAATAGTT     | miRNA | let-7k |
| t0061992 | 22 | 1 TGATGTAGTAGATTGAATAGTT    | miRNA | let-7k |
| t0064895 | 20 | 1 TGAGGAAGTAGATTGAATAG      | miRNA | let-7k |
| t0069192 | 21 | 1 TGAGGTAGTAGATTGAATAGG     | miRNA | let-7k |
| t0069272 | 20 | 1 TGAGGTAGTAGATTTTGCAG      | miRNA | let-7j |
| t0074339 | 19 | 1 TGAGGTAGTAGATTGTTTCG      | miRNA | let-7j |
| t0076778 | 23 | 1 TGAGGTAGTAGATTGTTTCAGAGG  | miRNA | let-7j |
| t0080921 | 22 | 1 TGATGTAGTAGTTTGTGCTGTT    | miRNA | let-7i |
| t0083534 | 19 | 1 TCAGGTAGTAGTCTGTGCT       | miRNA | let-7i |
| t0083767 | 18 | 1 TGAGGTAGTAGTTTGTGG        | miRNA | let-7i |
| t0085081 | 19 | 1 TGAGTTAGTCGTTTGTGCT       | miRNA | let-7i |
| t0086137 | 23 | 1 TGAGGTAGTAGTTTGTGGTGT     | miRNA | let-7i |
| t0089526 | 22 | 1 TGAGGTAGGAGCTTGTGCTGTT    | miRNA | let-7i |
| t0089681 | 20 | 1 TGAGGTAGTAGTTTGGGCTT      | miRNA | let-7i |
| t0091528 | 22 | 1 TGAGGTAGTAGTTTTTGTGCTGTT  | miRNA | let-7i |
| t0092157 | 21 | 1 TGAGGTAGTAATTTGTGCTGT     | miRNA | let-7i |
| t0093309 | 22 | 1 TGAGGGAGTAGTTTGTGCTGTA    | miRNA | let-7i |
| t0043966 | 20 | 1 GGAGGTAGTAGTTTGTGCTG      | miRNA | let-7i |
| t0059788 | 22 | 1 TGAGGTAGTATTTTGTGCTGTT    | miRNA | let-7i |
| t0083239 | 25 | 1 TGCGGTAGTAGTTTGTGCTGTTAGA | miRNA | let-7i |
| t0040760 | 25 | 1 TGAGGTAGTAGTTTGTGCTGTTAGG | miRNA | let-7i |
| t0041261 | 21 | 1 TGAGGTAGTCGTTTGTGCTGT     | miRNA | let-7i |
| t0041467 | 23 | 1 TGAGGTAGTAGTATGTGCTGTTA   | miRNA | let-7i |
| t0042332 | 22 | 1 TGAGGTAGGAGTTTGTGGTGT     | miRNA | let-7i |
| t0042385 | 23 | 1 TGAGGTAGTAGTTTATGCTGTAA   | miRNA | let-7i |
| t0043511 | 21 | 1 TGAGGTAGTAGTCTGTGCTGT     | miRNA | let-7i |
| t0043609 | 22 | 1 TGAGGGGGTAGTTTGTGCTGTT    | miRNA | let-7i |
| t0044564 | 21 | 1 TCAGGTAGTAGTTTGTGCTGT     | miRNA | let-7i |
| t0045007 | 20 | 1 TAAGGTAGTAGTTTGTGTTG      | miRNA | let-7i |
| t0045131 | 22 | 1 TGAGGTATTAGTTTGTGCTGTT    | miRNA | let-7i |
| t0045161 | 21 | 1 TGAGGTCGTAGTTTGTGCTGT     | miRNA | let-7i |
| t0045538 | 23 | 1 TGAGGCAGTAGTTTGTGCTGTTA   | miRNA | let-7i |
| t0046146 | 21 | 1 TGTGGTAGTAGTTTGTGCTGT     | miRNA | let-7i |
| t0046309 | 20 | 1 TGAGGTAGTAGTTTGTGGTG      | miRNA | let-7i |
| t0046536 | 22 | 1 TGAGGTGGAAGTTTGTGCTGTT    | miRNA | let-7i |
| t0046832 | 20 | 1 TGAGGTACTAGTTTGTGCTG      | miRNA | let-7i |
| t0047010 | 20 | 1 TCAGGTAGTAGTTTGTGCTG      | miRNA | let-7i |
| t0047038 | 23 | 1 TGAGGAAGTAGTTTGTGCTGTTG   | miRNA | let-7i |
| t0047528 | 22 | 1 TGAGGTAATAGTTTGTGCTGTT    | miRNA | let-7i |
| t0047950 | 19 | 1 TGACGTAGTAGTTTGTGCT       | miRNA | let-7i |
| t0049364 | 23 | 1 TGAGGTCGTAGTTTGTGCTGTTA   | miRNA | let-7i |
| t0049937 | 23 | 1 TGAGATAGTAGTTTGTGCTGTTA   | miRNA | let-7i |
| t0051206 | 20 | 1 TGAGATAGTAGTTTGTGCTG      | miRNA | let-7i |
| t0051978 | 19 | 1 AGAGGTAGTAGTTTGTGCT       | miRNA | let-7i |
| t0052004 | 19 | 1 TGAGGAAGTAGTTTGTGCT       | miRNA | let-7i |
| t0052189 | 23 | 1 TGAGGTATTAGTTTGCCTGTTT    | miRNA | let-7i |
| t0052386 | 22 | 1 TGAGGGAATAGTTTGTGCTGTT    | miRNA | let-7i |
| t0052763 | 23 | 1 TGAGGTAGTCGTTTGTGCTGTTA   | miRNA | let-7i |
| t0053503 | 21 | 1 TGAGGTAGTACTTTGTGCTGT     | miRNA | let-7i |
| t0053591 | 23 | 1 TGAGGTCGTAGTTTGTGCTGTTT   | miRNA | let-7i |
| t0053630 | 21 | 1 TGAGATAGTAGTTTGTGCTGT     | miRNA | let-7i |
| t0053700 | 19 | 1 TGAGGTAGTTGTTTGTGCT       | miRNA | let-7i |
| t0055003 | 23 | 1 TAAGGTAGTAGTTTGTGCTGTTA   | miRNA | let-7i |
| t0055598 | 23 | 1 TGAGGTAATAGTTTGTGCTGTAA   | miRNA | let-7i |

|          |    |                              |       |        |
|----------|----|------------------------------|-------|--------|
| t0056412 | 23 | 1 TGAGGTAGCAGTTTGTGCTGTTG    | miRNA | let-7i |
| t0056465 | 20 | 1 TGCGGTAGTAGTTTGTGCTG       | miRNA | let-7i |
| t0057175 | 22 | 1 TGAGAGAGTAGTTTGTGCTGTT     | miRNA | let-7i |
| t0058445 | 21 | 1 TGAGGTAGTAGTTTGAGCTGT      | miRNA | let-7i |
| t0058723 | 20 | 1 TGAGGTAGTAGTTTGTGATT       | miRNA | let-7i |
| t0058754 | 23 | 1 TGAGGTAGTGGTTTGTGCTGTTA    | miRNA | let-7i |
| t0059054 | 20 | 1 TGTGGTAGTAGTTTGTGCTG       | miRNA | let-7i |
| t0059954 | 19 | 1 TGAGGTAGAAAGTTTGTGCT       | miRNA | let-7i |
| t0060226 | 21 | 1 TGAGGTAGTAGTTAGTGCTGT      | miRNA | let-7i |
| t0061061 | 23 | 1 TGAGGTAGTAGATTGTGCTGTTT    | miRNA | let-7i |
| t0061164 | 20 | 1 TGAGGTAGTCGTTTGTGCTG       | miRNA | let-7i |
| t0061177 | 26 | 1 TGAGGTAGGAGTTTGTGCTGTTAATC | miRNA | let-7i |
| t0061375 | 20 | 1 TGGGGAAGTAGTTTGTGCTG       | miRNA | let-7i |
| t0061452 | 24 | 1 TGAGGTAGTAGTTTGTGTTGTAGG   | miRNA | let-7i |
| t0061639 | 22 | 1 TGAGGGAGTAGTTTGTGCTCTT     | miRNA | let-7i |
| t0061816 | 19 | 1 TGAGGTAGTAGTTTGTGCC        | miRNA | let-7i |
| t0062019 | 21 | 1 TGAGGTTGTAGTTTGTGCTGT      | miRNA | let-7i |
| t0062265 | 23 | 1 TGAGGTAGTAGTTTGTGCTTTAA    | miRNA | let-7i |
| t0062823 | 20 | 1 TGGGGTAGTAGTTTTTGCTG       | miRNA | let-7i |
| t0063324 | 20 | 1 TGAGGTGGTAGTTTGTGTTG       | miRNA | let-7i |
| t0064030 | 19 | 1 TGAGGTAGTAGTTTGGGCT        | miRNA | let-7i |
| t0064742 | 21 | 1 TGAGGGGGTAGTTTGTGCTGT      | miRNA | let-7i |
| t0064748 | 19 | 1 TGAGATAGTAGTTTGTGCT        | miRNA | let-7i |
| t0065167 | 22 | 1 TGAGGTAGTAGTTTGTGCCGTA     | miRNA | let-7i |
| t0065936 | 23 | 1 TGAGGCCGTAGTTTGTGCTGTTA    | miRNA | let-7i |
| t0066471 | 23 | 1 TTAGGTAGCAGTTTGTGCTGTTT    | miRNA | let-7i |
| t0066726 | 26 | 1 TGATGTAGTAGTTTGTGCTGTTAATC | miRNA | let-7i |
| t0067983 | 19 | 1 TGAGGTAGTGGTTTGTGCT        | miRNA | let-7i |
| t0068020 | 26 | 1 TGAGGGAGTAGTTTGTGCTGTTAATC | miRNA | let-7i |
| t0068236 | 26 | 1 TGAGGTAGTAGTTTGCCTGTTAATC  | miRNA | let-7i |
| t0068725 | 21 | 1 TGAGGTACTAGTTTGTGCTGT      | miRNA | let-7i |
| t0068882 | 22 | 1 TGAGGTAGTAGTTTGGGCTGTA     | miRNA | let-7i |
| t0069237 | 22 | 1 TGAGGTAGTAGTTAGTGCTGTT     | miRNA | let-7i |
| t0069305 | 22 | 1 TGAGGTAGTAGTCTGTGCTGTA     | miRNA | let-7i |
| t0069425 | 23 | 1 TGAGGGAGTAGTTTGTGCTGCTT    | miRNA | let-7i |
| t0069437 | 19 | 1 CGAGGTAGTAGTTTGTGCT        | miRNA | let-7i |
| t0071181 | 22 | 1 TGGGGTAGTAGTTTGTGCTGTA     | miRNA | let-7i |
| t0071394 | 26 | 1 TGAGGCAGTAGTTTGTGCTGTTAATC | miRNA | let-7i |
| t0071768 | 23 | 1 CGAGGTAGTAGTTTGTGCTGTTA    | miRNA | let-7i |
| t0072096 | 21 | 1 TGAGGTAGTAGTTTGGGCTGT      | miRNA | let-7i |
| t0072157 | 22 | 1 TGAGGAGGTAGTTTGTGCTGTT     | miRNA | let-7i |
| t0072978 | 23 | 1 TGAGGTAATAGTTTGTGCTGTTT    | miRNA | let-7i |
| t0072992 | 22 | 1 TGAGGTAGTAGCTTGTGCTGTG     | miRNA | let-7i |
| t0073307 | 23 | 1 TGAGGTAGTAGTTTATGCTGTTA    | miRNA | let-7i |
| t0073996 | 22 | 1 TGAGGTAGGAGTTTGCCTGTT      | miRNA | let-7i |
| t0074168 | 21 | 1 TGAGGTAGTAGTTTGTCTGT       | miRNA | let-7i |
| t0074185 | 20 | 1 TGAGGTAGTAGATTGTGCTT       | miRNA | let-7i |
| t0074694 | 23 | 1 TGAGCTAGTAGTTTGTGCTGTTT    | miRNA | let-7i |
| t0075726 | 22 | 1 TGAGGTAGTAGTTTGTGCTGGA     | miRNA | let-7i |
| t0075971 | 26 | 1 TGAGGTAGTAGTTTGTGCTGTTTATC | miRNA | let-7i |
| t0076423 | 21 | 1 TGAGGTAGTATTTTGTGCTGT      | miRNA | let-7i |
| t0077166 | 22 | 1 TGAGGTAGTAGTTTGGGATGTT     | miRNA | let-7i |
| t0077299 | 19 | 1 GGAGGTAGTAGTTTGTGCT        | miRNA | let-7i |
| t0078264 | 22 | 1 TGAAGCAGTAGTTTGTGCTGTT     | miRNA | let-7i |
| t0078705 | 22 | 1 TGACGTAGTAGTTTGTGCTGTT     | miRNA | let-7i |
| t0079235 | 21 | 1 TGAGGTAGTAGTATGTGCTGT      | miRNA | let-7i |
| t0079280 | 19 | 1 TGAGGTAGTAGTTTATGCT        | miRNA | let-7i |
| t0079491 | 27 | 1 TGAGGTAGTAGTTTGTGCTGTTAATC | miRNA | let-7i |

|          |    |                              |       |        |
|----------|----|------------------------------|-------|--------|
| t0079903 | 21 | 1 TGAGGCAGTAGTTTGTGCTTT      | miRNA | let-7i |
| t0080772 | 22 | 1 TGAGGTAAGTAGTTTGTGCTGTG    | miRNA | let-7i |
| t0081238 | 23 | 1 TGAGGTAGTAGTTTGTGCTATTA    | miRNA | let-7i |
| t0082812 | 19 | 1 TGAGGTAGTAGTTTGAGCT        | miRNA | let-7i |
| t0083059 | 23 | 1 TGAGGTAGTAGTTTTTGCTGTTG    | miRNA | let-7i |
| t0084003 | 19 | 1 TGCGGTAGTAGTTTGTGCT        | miRNA | let-7i |
| t0084056 | 23 | 1 TGAGGTAGTAGTTTGTGCTGTCA    | miRNA | let-7i |
| t0084351 | 23 | 1 TGAGGTAGTGGTTTGTGCTGTTT    | miRNA | let-7i |
| t0084617 | 19 | 1 TGAGGTAGCAGTTTGTGCT        | miRNA | let-7i |
| t0084984 | 25 | 1 TGAGGTAGTAGATTGTGCTGTTAGA  | miRNA | let-7i |
| t0085042 | 21 | 1 TGAGCTAGTAGTTTGTGCTGT      | miRNA | let-7i |
| t0085685 | 23 | 1 CGAGGTAGTAGTTTGTGCTGTTG    | miRNA | let-7i |
| t0086016 | 23 | 1 TGAGGTAGTAGTTTGTGTTGTTA    | miRNA | let-7i |
| t0086413 | 21 | 1 TGATGTAGTAGTTTGTGCTGT      | miRNA | let-7i |
| t0087429 | 22 | 1 TGAGGAAGTAGTTTGTGCTGTA     | miRNA | let-7i |
| t0088427 | 20 | 1 TGGGGTAGTAGTTTGTGCTT       | miRNA | let-7i |
| t0088772 | 23 | 1 TGTGGTAGTAGTTTGTGCTGTTT    | miRNA | let-7i |
| t0089039 | 20 | 1 TGAGGGAGTAGTTTTGCTG        | miRNA | let-7i |
| t0089554 | 22 | 1 TGAGGTAGTAGTTCGCGTGGTT     | miRNA | let-7h |
| t0089576 | 23 | 1 TGAGGTAGTAATTTGTACAGTTG    | miRNA | let-7g |
| t0090542 | 21 | 1 GAGGAAGTAGTTTGTATAGTT      | miRNA | let-7g |
| t0091248 | 24 | 1 TCAGGTAGTAGTTTGTACAGTTAA   | miRNA | let-7g |
| t0091469 | 22 | 1 TGAGGTAGTAGTTTGTGCAGGT     | miRNA | let-7g |
| t0091690 | 21 | 1 TGAGGTAGTAGTTTGTACAAT      | miRNA | let-7g |
| t0091758 | 23 | 1 TGAGGTGGTAGTTTGTACAGTTA    | miRNA | let-7g |
| t0092128 | 22 | 1 TGAGGTAGTATTTTGTACCGTT     | miRNA | let-7g |
| t0092173 | 23 | 1 TGAGATAGTAGTTTGTACAGTTA    | miRNA | let-7g |
| t0092387 | 22 | 1 TGAGGTAGTAGCTTGTACAGGT     | miRNA | let-7g |
| t0092507 | 23 | 1 TCAGGTAGTAGTTTGTACAGTTA    | miRNA | let-7g |
| t0093458 | 21 | 1 GAGGAAGTAGTTTGTACAGTT      | miRNA | let-7g |
| t0093506 | 25 | 1 TGAGGTAGTAGTTTGTACAGTTTTTC | miRNA | let-7g |
| t0069978 | 22 | 1 TGAGGTAATAGTTTGTACAGAT     | miRNA | let-7g |
| t0040771 | 23 | 1 GGAGGTAGTAGTTTGTACAGTTA    | miRNA | let-7g |
| t0042117 | 21 | 1 TGACGTAGTAGTTTGTACAGT      | miRNA | let-7g |
| t0042221 | 22 | 1 TGAGCTGGTAGTTTGTACAGTT     | miRNA | let-7g |
| t0042287 | 21 | 1 TGAGGTAGTAGTGTGTACAGT      | miRNA | let-7g |
| t0042390 | 20 | 1 TGAGGTAGTAGCTTGTACAG       | miRNA | let-7g |
| t0042727 | 22 | 1 TGAGGTAGTAGTTTGTACTGTA     | miRNA | let-7g |
| t0043260 | 22 | 1 TGAGGTAGTAGCTTTTACAGTT     | miRNA | let-7g |
| t0044275 | 20 | 1 TGAGGTAGCAGTTTGTACAG       | miRNA | let-7g |
| t0044952 | 19 | 1 TGAGGTGGTAGTTTGTACA        | miRNA | let-7g |
| t0045247 | 21 | 1 TGAGGCAGTAGTTTGTATAGT      | miRNA | let-7g |
| t0046111 | 21 | 1 TGAGGTAGTAGTTTGTACACT      | miRNA | let-7g |
| t0046415 | 26 | 1 TGAGGTAGTAGTTTGTACAGTTAATC | miRNA | let-7g |
| t0046962 | 20 | 1 TGAGGTAGTAGTTCGTACAG       | miRNA | let-7g |
| t0047367 | 22 | 1 TGAGGTAGTAGTTTGTGAAGTT     | miRNA | let-7g |
| t0047480 | 22 | 1 TGAGGAGGTAGTTTGTACAGTT     | miRNA | let-7g |
| t0047966 | 23 | 1 TGAGGTAATAGTTTGTACAGTTT    | miRNA | let-7g |
| t0048560 | 22 | 1 TGAGGGAGTAGTTTGGACAGTT     | miRNA | let-7g |
| t0049883 | 24 | 1 TGGGGTAGTAGTTTGTACAGTTGA   | miRNA | let-7g |
| t0050034 | 23 | 1 TGGGGTAGTAGTTTGTACAGTTT    | miRNA | let-7g |
| t0050091 | 22 | 1 TGAGTTAGTAGTTTATACAGTT     | miRNA | let-7g |
| t0050591 | 23 | 1 TGAGGAAGTAGTTTGTACAGTTT    | miRNA | let-7g |
| t0051135 | 20 | 1 TGAGGGAGAAGTTTGTACAG       | miRNA | let-7g |
| t0053139 | 21 | 1 TGAGGTTGTAGTTTGTACAGT      | miRNA | let-7g |
| t0053808 | 23 | 1 TGAGGTAGTAGTTCGTACAGTTA    | miRNA | let-7g |
| t0055371 | 22 | 1 TGAGGCAGTAGTTTGTATAGTT     | miRNA | let-7g |
| t0055967 | 19 | 1 TGAGGTAGTAGTTTGTACT        | miRNA | let-7g |

|          |    |                            |       |           |
|----------|----|----------------------------|-------|-----------|
| t0056362 | 21 | 1 TGAGGTAGTCGTTTGTACAGG    | miRNA | let-7g    |
| t0057256 | 21 | 1 TGAGGTCGTAGTTTGTACAGT    | miRNA | let-7g    |
| t0059244 | 23 | 1 TGAGGTAGTAGTGTGTACAGTTA  | miRNA | let-7g    |
| t0059360 | 22 | 1 TGAGGTCGTCGTTTGTACAGTT   | miRNA | let-7g    |
| t0059966 | 22 | 1 TGAGTTAGCAGTTTGTACAGTT   | miRNA | let-7g    |
| t0060734 | 21 | 1 TGAGGTAGTAGTTTGTAAACGT   | miRNA | let-7g    |
| t0060750 | 22 | 1 TGAGGGGGTAGTTTGTACAGTT   | miRNA | let-7g    |
| t0061018 | 22 | 1 TGAGGTAGAAAGTATGTACAGTT  | miRNA | let-7g    |
| t0061344 | 23 | 1 TGAGGTAGGAGTTTGTACAGTTG  | miRNA | let-7g    |
| t0061362 | 22 | 1 TGAGGTGGTAGTTTGTAAAGTT   | miRNA | let-7g    |
| t0061774 | 21 | 1 TGAGGCAGTAGTTTGTAAAGT    | miRNA | let-7g    |
| t0061972 | 22 | 1 TGCGGTAGTAGTTTTTACAGTT   | miRNA | let-7g    |
| t0063039 | 23 | 1 TGAGGTAGTAGTTTATACAGTTA  | miRNA | let-7g    |
| t0063220 | 23 | 1 TGAGGAAGTAGTTTGTACAGTTG  | miRNA | let-7g    |
| t0063297 | 22 | 1 TGAGGTGGTCGTTTGTACAGTT   | miRNA | let-7g    |
| t0063688 | 21 | 1 TGAGGCAGTAGTTTGTGCAGT    | miRNA | let-7g    |
| t0063853 | 21 | 1 TGAGCTAGTAGTTTGTACAGT    | miRNA | let-7g    |
| t0064182 | 19 | 1 TGCGGTAGTAGTTTGTACA      | miRNA | let-7g    |
| t0064215 | 22 | 1 TGAGGGAGTAGTTTGAACAGTT   | miRNA | let-7g    |
| t0065542 | 22 | 1 TGAGGTATTAGTTCGTACAGTT   | miRNA | let-7g    |
| t0065927 | 23 | 1 TGAGGTAGCAGTTTGTACAGTTA  | miRNA | let-7g    |
| t0067910 | 23 | 1 TGAGATAGTAGTTTGTACAGTTG  | miRNA | let-7g    |
| t0068082 | 20 | 1 TGAGGTAGTAGTTTATACAG     | miRNA | let-7g    |
| t0068632 | 23 | 1 TGAGGTGGTAGTTTGTACAGTTG  | miRNA | let-7g    |
| t0069141 | 22 | 1 TGAGGTAGCGGTTTGTACAGTT   | miRNA | let-7g    |
| t0069516 | 20 | 1 TGAGGAAGTAGTTTGTACAG     | miRNA | let-7g    |
| t0070989 | 20 | 1 TGAGGAAGTAGTTTGTATAG     | miRNA | let-7g    |
| t0071316 | 23 | 1 TGAGGTAGTAGTTTATACAGTTG  | miRNA | let-7g    |
| t0072187 | 21 | 1 TGAGGTAGTAGTTTGTACTTT    | miRNA | let-7g    |
| t0072641 | 21 | 1 TGAGGTAGTAGTTTGTTCAGT    | miRNA | let-7g    |
| t0073846 | 22 | 1 TGAAGTAGTAGTTCGTACAGTT   | miRNA | let-7g    |
| t0075182 | 23 | 1 CGAGGTAGTAGTTTGTACAGTTA  | miRNA | let-7g    |
| t0075369 | 23 | 1 TGAGGTAGTAGCTTGTACAGTTT  | miRNA | let-7g    |
| t0075397 | 23 | 1 TGAGGTAGTAGTTTGTACTGTTT  | miRNA | let-7g    |
| t0075712 | 20 | 1 GAGGTAGTAGTTTGTACAGT     | miRNA | let-7g    |
| t0075781 | 22 | 1 TGGGGTAGTAGTTTGCACAGTT   | miRNA | let-7g    |
| t0076498 | 22 | 1 TGAGTTAGTAGTTTGTACAGAT   | miRNA | let-7g    |
| t0076646 | 19 | 1 TGAGGTAGTAGTTTGTTC       | miRNA | let-7g    |
| t0076785 | 22 | 1 TGAGGTAGTAGTTTGTGGAGTT   | miRNA | let-7g    |
| t0078454 | 19 | 1 TGAGGTAGTAGTTTGAACA      | miRNA | let-7g    |
| t0078484 | 20 | 1 TGAGATAGTAGTTTGTACAG     | miRNA | let-7g    |
| t0078622 | 24 | 1 TGAGGAAGTAGTTTGTACAGTTGA | miRNA | let-7g    |
| t0078987 | 21 | 1 TGGGGTGGTAGTTTGTACAGT    | miRNA | let-7g    |
| t0079242 | 23 | 1 TGAGGTAGTAGTTTGTACTGTAG  | miRNA | let-7g    |
| t0079509 | 22 | 1 TGAGTTAGTAGTTTGTAGAGTT   | miRNA | let-7g    |
| t0079842 | 23 | 1 TGAGGTAGTAGTTTGTACCGTTA  | miRNA | let-7g    |
| t0079965 | 21 | 1 TGAGGTAGTAGTATGTACAGT    | miRNA | let-7g    |
| t0080350 | 22 | 1 TGAGGGAGTATTTTGTACAGTT   | miRNA | let-7g    |
| t0081945 | 23 | 1 ATGAGGTAGTAGTTTGTACAGTT  | miRNA | let-7g    |
| t0082434 | 22 | 1 TGAGGTGGTAGTTTGTATAGTT   | miRNA | let-7g    |
| t0083055 | 22 | 1 TGAGGCAGTAGTTTGTACCGTT   | miRNA | let-7g    |
| t0083228 | 22 | 1 TGAGGTAGTCGTTTGTGCAGTT   | miRNA | let-7g    |
| t0083882 | 21 | 1 CGAGGTAGTGGATTGTATAGT    | miRNA | let-7f-5p |
| t0084930 | 22 | 1 TGAGGTAGTCGATTGTATAGCT   | miRNA | let-7f-5p |
| t0085793 | 23 | 1 TGAGGTAGTGGGTTGTATGGATC  | miRNA | let-7f-5p |
| t0086007 | 22 | 1 TGAGGGGGTGGATTGTATAGTT   | miRNA | let-7f-5p |
| t0086325 | 22 | 1 TGTGGTAGTGGATTGTATAGTT   | miRNA | let-7f-5p |
| t0086993 | 20 | 1 AGGTAGTAGATTGTATAGGG     | miRNA | let-7f-5p |

|          |    |                                  |       |           |
|----------|----|----------------------------------|-------|-----------|
| t0087252 | 21 | 1 TGAGGTAGTAGATTGTATGGA          | miRNA | let-7f-5p |
| t0087530 | 22 | 1 TGAGGTAGTAGATTGTATCGGG         | miRNA | let-7f-5p |
| t0088461 | 22 | 1 TGAGGTAGTAGATTGTAGTTTT         | miRNA | let-7f-5p |
| t0089211 | 21 | 1 TGGGGTAGTGGATTGTTTGGT          | miRNA | let-7f-5p |
| t0089862 | 21 | 1 AGAGGTAGTAGATTGTATCCT          | miRNA | let-7f-5p |
| t0090384 | 22 | 1 TGAGGTAGTGGGTTGTATATTT         | miRNA | let-7f-5p |
| t0091441 | 22 | 1 TGAGGTAGTAGATTGTATTGGT         | miRNA | let-7f-5p |
| t0042028 | 22 | 1 AGAGGTAGTAGATTGTATGGGT         | miRNA | let-7f-5p |
| t0042210 | 22 | 1 TGAGGTGGTGGATTGTGTAGTT         | miRNA | let-7f-5p |
| t0043293 | 20 | 1 GAGGTAGTGGATTGTATAGT           | miRNA | let-7f-5p |
| t0044049 | 19 | 1 TGAGGTAGTGGATTGTAGT            | miRNA | let-7f-5p |
| t0044200 | 22 | 1 CGAGGTAGTGGATTGTATAGTT         | miRNA | let-7f-5p |
| t0044318 | 21 | 1 TGAGGTAGTGGATTGTATATT          | miRNA | let-7f-5p |
| t0044870 | 21 | 1 TAGGTAGTGGATTGTATAGTT          | miRNA | let-7f-5p |
| t0045256 | 23 | 1 TGAGGTAGTAGATTGTATAGGAA        | miRNA | let-7f-5p |
| t0047885 | 22 | 1 TGAGGTAGTGGACTGTATAGTT         | miRNA | let-7f-5p |
| t0049594 | 24 | 1 TGAGGTAGTGGATTGTATAGTTAA       | miRNA | let-7f-5p |
| t0050359 | 22 | 1 TGGGGTAGTGGATTGTGTAGTT         | miRNA | let-7f-5p |
| t0050553 | 22 | 1 TGAGGTAGTGGCTTGTATAGTT         | miRNA | let-7f-5p |
| t0051312 | 22 | 1 TGAGGTAGTAGATTGTATACAA         | miRNA | let-7f-5p |
| t0051510 | 21 | 1 TGAGGTAGTGGGTTGTATAGA          | miRNA | let-7f-5p |
| t0051730 | 22 | 1 TGAGGTAGTTGATTGTATTGTT         | miRNA | let-7f-5p |
| t0052417 | 20 | 1 TGAGGTAGTAGATAGTATGT           | miRNA | let-7f-5p |
| t0052768 | 20 | 1 TGAGGTAGTACATTGTATTT           | miRNA | let-7f-5p |
| t0053436 | 22 | 1 AGAGGTAGTGGATTGTATAGTT         | miRNA | let-7f-5p |
| t0053640 | 22 | 1 TGAGTTAGTGGATTGTATAGTT         | miRNA | let-7f-5p |
| t0055060 | 22 | 1 TGAGGTAGTAGATTGTATCGTA         | miRNA | let-7f-5p |
| t0055414 | 22 | 1 TGAGGTAGTAGATTGTATGGGT         | miRNA | let-7f-5p |
| t0056498 | 22 | 1 TGAGGTAGTGGGTTGTATTGTT         | miRNA | let-7f-5p |
| t0057756 | 21 | 1 TGAGGTAGTGGATTGGATAGT          | miRNA | let-7f-5p |
| t0058177 | 20 | 1 TGAGGTAGTAGATTGGATTT           | miRNA | let-7f-5p |
| t0058676 | 20 | 1 TGAGGTAGTAGATCGTATGT           | miRNA | let-7f-5p |
| t0058749 | 20 | 1 TGAGGTAGTAGAGTGTATTT           | miRNA | let-7f-5p |
| t0059567 | 20 | 1 TGAGGTAGTAGATTGTATGC           | miRNA | let-7f-5p |
| t0059923 | 22 | 1 TGAGGTAGTAGATTGTATGGTC         | miRNA | let-7f-5p |
| t0060167 | 22 | 1 TGAGGTAGTGGATTGTATAGTC         | miRNA | let-7f-5p |
| t0060481 | 24 | 1 TGAGGTAGTGGATTGTATAGTTAG       | miRNA | let-7f-5p |
| t0061279 | 22 | 1 TGAGGTAGTTCGATTGTATAGTA        | miRNA | let-7f-5p |
| t0061323 | 44 | 1 TGAGGTAGTAGATTGTTTGGTGGTGTGGG  | miRNA | let-7f-5p |
| t0062803 | 22 | 1 TGCGGTAGTGGATTGTATAGTT         | miRNA | let-7f-5p |
| t0062988 | 22 | 1 TGAGGTAGTAGATTGTATGTTT         | miRNA | let-7f-5p |
| t0063542 | 21 | 1 TGAGGTAGTTGATTGTATAGG          | miRNA | let-7f-5p |
| t0065020 | 22 | 1 TGAGGTAGTGGATTGTATCGTT         | miRNA | let-7f-5p |
| t0065555 | 20 | 1 TGAGGCAGTGGATTGTATAG           | miRNA | let-7f-5p |
| t0066013 | 22 | 1 TGGGGTAGTGGGTTGTATAGTT         | miRNA | let-7f-5p |
| t0066129 | 20 | 1 TGAGGTAGTAGACTGTATTT           | miRNA | let-7f-5p |
| t0066333 | 20 | 1 TGAGGTAGTAGATCGTATTT           | miRNA | let-7f-5p |
| t0066893 | 21 | 1 TGAGGTA CTGGATTGTATAGT         | miRNA | let-7f-5p |
| t0066953 | 21 | 1 TGAGGTAGTTCGATCGTATAGA         | miRNA | let-7f-5p |
| t0067235 | 23 | 1 TGAGGTAGTGGATTGTATGGTTA        | miRNA | let-7f-5p |
| t0067974 | 24 | 1 TGAGGTAGTAGATTGTATAGAATC       | miRNA | let-7f-5p |
| t0068563 | 43 | 1 TGAGGTAGTGGATTGTTTGGTTTGGTTTGC | miRNA | let-7f-5p |
| t0069451 | 22 | 1 TGAGGTAGTGGATTTTATAGTT         | miRNA | let-7f-5p |
| t0070814 | 21 | 1 TGAGGTAGTGGTTTGTATAGT          | miRNA | let-7f-5p |
| t0071134 | 21 | 1 TGAGGCAGTGGATTGTATAGT          | miRNA | let-7f-5p |
| t0071758 | 26 | 1 TGAGGTAGTGGGTTGTATGGTTTATC     | miRNA | let-7f-5p |
| t0072380 | 22 | 1 TGAGGTAGTAGATTGTATGGGG         | miRNA | let-7f-5p |
| t0072939 | 22 | 1 TGAGGTAGTGGATTGTATACTT         | miRNA | let-7f-5p |

|          |    |                            |       |           |
|----------|----|----------------------------|-------|-----------|
| t0073689 | 22 | 1 TGATGTAGTGGGTTGTATGGTT   | miRNA | let-7f-5p |
| t0074095 | 21 | 1 TGGGGTAGTGGATTGTATAGT    | miRNA | let-7f-5p |
| t0077169 | 21 | 1 GGAGGTAGTAGATTGTATATA    | miRNA | let-7f-5p |
| t0077228 | 21 | 1 TGAGGTAGTGGATTGTTAGTT    | miRNA | let-7f-5p |
| t0077540 | 22 | 1 TGAGGTAGTGGATTGTATAGTG   | miRNA | let-7f-5p |
| t0078090 | 19 | 1 GGATTAAGGCAGTGGATTG      | miRNA | let-7f-5p |
| t0078463 | 23 | 1 ATGAGGTAGTAGATTGTATAGGG  | miRNA | let-7f-5p |
| t0078468 | 22 | 1 TGAGGTAGTAGATTGTATTGCC   | miRNA | let-7f-5p |
| t0078613 | 22 | 1 TGAGGTAGCGGATTGTATAGTT   | miRNA | let-7f-5p |
| t0080899 | 22 | 1 TGAGGTAGTAGATTGTATAATA   | miRNA | let-7f-5p |
| t0081029 | 20 | 1 TGAGGTAGTCGATTGTATCG     | miRNA | let-7f-5p |
| t0082856 | 20 | 1 TGAGGTAGTCGATTGTAGTT     | miRNA | let-7f-5p |
| t0083997 | 22 | 1 TGAGGTAGTAGATTGTAGAGTA   | miRNA | let-7f    |
| t0084194 | 22 | 1 TGAGTTAGTAGATTGTATAGTA   | miRNA | let-7f    |
| t0085810 | 21 | 1 TGAGGTAGTAGATTATATTGT    | miRNA | let-7f    |
| t0086063 | 22 | 1 TGAGGTAGTCGATTGTCTAGTT   | miRNA | let-7f    |
| t0086517 | 21 | 1 GAGATAGTAGATTGTATAGTT    | miRNA | let-7f    |
| t0087379 | 22 | 1 TGAGGTAGTAGAGTTTATAGTT   | miRNA | let-7f    |
| t0088990 | 22 | 1 TGGGGTAATAGATTGTATAGTT   | miRNA | let-7f    |
| t0089541 | 22 | 1 TGAAGTAGTAGATCGTATAGTT   | miRNA | let-7f    |
| t0089577 | 23 | 1 GGAGGTAGTAGATTGTATAGTTG  | miRNA | let-7f    |
| t0090136 | 22 | 1 TTGAGGTTGTAGATTGTATAGT   | miRNA | let-7f    |
| t0091178 | 22 | 1 TGAGGTGGTAGACTGTATAGTT   | miRNA | let-7f    |
| t0092737 | 20 | 1 AGGTAGTAGATTGTAAAGTG     | miRNA | let-7f    |
| t0093414 | 21 | 1 TGAGGTAGAAGATTATATAGT    | miRNA | let-7f    |
| t0040789 | 20 | 1 TCGGTTAGTAGATTGTCTAG     | miRNA | let-7f    |
| t0040843 | 22 | 1 TGAGGTAGTAGATTATATTGTT   | miRNA | let-7f    |
| t0041033 | 20 | 1 TGAGGTAGTCGATTGTGTAG     | miRNA | let-7f    |
| t0041082 | 22 | 1 TGAGGTATTAGATTGTATAGGT   | miRNA | let-7f    |
| t0041084 | 22 | 1 TGAGGTAGTAGATCGTATACTT   | miRNA | let-7f    |
| t0041088 | 21 | 1 GAGGTAGTAGACTGTATAGTT    | miRNA | let-7f    |
| t0041127 | 23 | 1 TGAGGTAGTAGATTCTATAGTAA  | miRNA | let-7f    |
| t0041171 | 22 | 1 AGAGGTAGTAGATTGTATAGGT   | miRNA | let-7f    |
| t0041186 | 22 | 1 TGAGGTAGTCGCTTGTATAGTT   | miRNA | let-7f    |
| t0041202 | 22 | 1 TGAGGTAGTATATTGTACAGTT   | miRNA | let-7f    |
| t0041232 | 20 | 1 TGAGGTAGTAGATTGGTTAG     | miRNA | let-7f    |
| t0041319 | 22 | 1 AGAGCTAGTAGATTGTATAGTT   | miRNA | let-7f    |
| t0041456 | 24 | 1 TGAGGTAGTAAATTGTATAGTTTG | miRNA | let-7f    |
| t0041557 | 22 | 1 TGAGGTAGTAGATTGCACAGTT   | miRNA | let-7f    |
| t0041594 | 23 | 1 TGAGGTCGTAGCTTGTATAGTTT  | miRNA | let-7f    |
| t0041622 | 21 | 1 TCAGGTAGTAGATTGTTTAGT    | miRNA | let-7f    |
| t0041657 | 21 | 1 AGGTAGTAGATTGTATAGATG    | miRNA | let-7f    |
| t0041686 | 22 | 1 TGAGATAGTAGATTGTATTGTT   | miRNA | let-7f    |
| t0041697 | 21 | 1 GAGGTAGTAGCTTGTATAGTT    | miRNA | let-7f    |
| t0041989 | 22 | 1 TCCGGTAGTAGATTGTATAGTT   | miRNA | let-7f    |
| t0042297 | 22 | 1 AGAGGCAGTAGATTGTATAGTT   | miRNA | let-7f    |
| t0042388 | 21 | 1 TGAGGTAGTAGATTGTGTAGG    | miRNA | let-7f    |
| t0042443 | 23 | 1 TGAGGTAGTAGATTGTACAGTGT  | miRNA | let-7f    |
| t0042493 | 23 | 1 TGAGGTAGTAGATTGGATAGTTG  | miRNA | let-7f    |
| t0042754 | 22 | 1 TGAGGCAGTAGATTGTGTAGTT   | miRNA | let-7f    |
| t0042757 | 22 | 1 TGGGGTCGTAGATTGTATAGTT   | miRNA | let-7f    |
| t0042862 | 22 | 1 TGTGGTAGTAGATTGTTTAGTT   | miRNA | let-7f    |
| t0042925 | 20 | 1 TGAGGCAGTAGATTGGATAG     | miRNA | let-7f    |
| t0042995 | 21 | 1 TGAGGTAGAAGATTGTATAGG    | miRNA | let-7f    |
| t0043053 | 22 | 1 TGAGGTATTAGAATGTATAGTT   | miRNA | let-7f    |
| t0043155 | 22 | 1 TGAGCTAGTAGATTGTATACTT   | miRNA | let-7f    |
| t0043185 | 21 | 1 TGGGGTTGTAGATTGTATAGT    | miRNA | let-7f    |
| t0043379 | 20 | 1 TGAGGTAGTACATTGTATCG     | miRNA | let-7f    |



|          |    |                            |       |        |
|----------|----|----------------------------|-------|--------|
| t0043439 | 20 | 1 TGAGCAAGTAGATTGTATAG     | miRNA | let-7f |
| t0043543 | 21 | 1 TGAGGTAGTAGATCGTTTAGT    | miRNA | let-7f |
| t0043625 | 23 | 1 ATGAGGTAGTAGATTGTATGGTT  | miRNA | let-7f |
| t0043643 | 22 | 1 TAAGGTAGTAGATTCTATAGTT   | miRNA | let-7f |
| t0043661 | 19 | 1 TGCGGTAGTAGCTTGATA       | miRNA | let-7f |
| t0043826 | 22 | 1 TCAGGTAGTAGCTTGATAGTT    | miRNA | let-7f |
| t0043842 | 22 | 1 TGAGGCAGTAGATTGGATAGTT   | miRNA | let-7f |
| t0043867 | 22 | 1 TGAGGTAATAGATTGTACAGTT   | miRNA | let-7f |
| t0043869 | 22 | 1 TGCGGTAGTAGATTGTATCGTT   | miRNA | let-7f |
| t0043879 | 22 | 1 TGAGATAGTAGATTGTATAGGT   | miRNA | let-7f |
| t0043996 | 21 | 1 TGGGGTATTAGATTGTATAGT    | miRNA | let-7f |
| t0044000 | 24 | 1 TGAGGTAGTCGATTGTATAGTTAA | miRNA | let-7f |
| t0044042 | 22 | 1 TGAGGTAGTAGATCGGTAGTT    | miRNA | let-7f |
| t0044256 | 22 | 1 TGAGATAGTAGATTTTATAGTT   | miRNA | let-7f |
| t0044491 | 20 | 1 TGAGGTAGTAGATTGTGAAG     | miRNA | let-7f |
| t0044531 | 22 | 1 TGAGGTAGTTGATTGTAAAGTT   | miRNA | let-7f |
| t0044677 | 22 | 1 TGCGGCAGTAGATTGTATAGTT   | miRNA | let-7f |
| t0044680 | 22 | 1 TGAGGTAGTAGATTGTAAGTT    | miRNA | let-7f |
| t0044743 | 22 | 1 TGTGGTAGTAGATTGTATACTT   | miRNA | let-7f |
| t0044779 | 22 | 1 TTAGGTAGTAGATTGTATAGCT   | miRNA | let-7f |
| t0044986 | 22 | 1 GAGGTAGCAGATTGTATAGTTG   | miRNA | let-7f |
| t0045132 | 22 | 1 TGAGGTAGTAGTTTCTATAGTT   | miRNA | let-7f |
| t0045466 | 22 | 1 TGAGGTAGTATATTGTATATTT   | miRNA | let-7f |
| t0045476 | 24 | 1 TGAGGTAGTAGATTGTATCGTTAA | miRNA | let-7f |
| t0045775 | 22 | 1 TGAGGTAGTAGACTGCATAGTT   | miRNA | let-7f |
| t0046082 | 21 | 1 TGAGGTAGTAGATTGTGGAGT    | miRNA | let-7f |
| t0046170 | 21 | 1 TGAGGCAGTAGATTGTACAGT    | miRNA | let-7f |
| t0046241 | 21 | 1 TGAGGTAGTAGATTGTAAAGT    | miRNA | let-7f |
| t0046393 | 21 | 1 TGAGGTCGTAGATTGTATCGT    | miRNA | let-7f |
| t0046466 | 24 | 1 TGAGGTAGAAGATTGTATAGTTGA | miRNA | let-7f |
| t0046596 | 21 | 1 TGAGGTAGCAGATTGTATAGA    | miRNA | let-7f |
| t0046656 | 22 | 1 TGAGGTTGTAGATTGTATAGAT   | miRNA | let-7f |
| t0046679 | 20 | 1 AGGTACTAGATTGTATAGTG     | miRNA | let-7f |
| t0046736 | 21 | 1 TGAGGTAGTAGAATGCATAGT    | miRNA | let-7f |
| t0046783 | 23 | 1 TGACGTAGTAGATTGTATAGTTT  | miRNA | let-7f |
| t0046810 | 21 | 1 TGAGGCAGTAGATTGCATAGT    | miRNA | let-7f |
| t0046839 | 21 | 1 TGAGGTAGTAGATTGTACCGT    | miRNA | let-7f |
| t0046853 | 19 | 1 TTAGGTAGTAGATTGTATA      | miRNA | let-7f |
| t0047027 | 22 | 1 TTAGGTAGTAGCTTGATAGTT    | miRNA | let-7f |
| t0047036 | 20 | 1 GAGGTAGTAGATTGTATAGG     | miRNA | let-7f |
| t0047047 | 19 | 1 TGTAGTAGATTGTATAGTC      | miRNA | let-7f |
| t0047077 | 24 | 1 TGAGGTTGTAGATTGTATAGTTAG | miRNA | let-7f |
| t0047315 | 21 | 1 TTGAGGAAGTAGATTGTAAAG    | miRNA | let-7f |
| t0047575 | 21 | 1 TAAGGTAGCAGATTGTATAGT    | miRNA | let-7f |
| t0047606 | 22 | 1 TGCGGTGGTAGATTGTATAGTT   | miRNA | let-7f |
| t0047780 | 22 | 1 CTGAGGAAGTAGATTGTATAGT   | miRNA | let-7f |
| t0047814 | 23 | 1 TGAGGTAGTAGACTGTATAGTTA  | miRNA | let-7f |
| t0048067 | 22 | 1 CGAGGTAGTAGATTGTATAGGT   | miRNA | let-7f |
| t0048118 | 22 | 1 TGAGGTAGTAGCTGGATAGTT    | miRNA | let-7f |
| t0048233 | 22 | 1 CGAGGCAGTAGATTGTATAGTT   | miRNA | let-7f |
| t0048258 | 20 | 1 TAGGGTAGTAGATTGTATAG     | miRNA | let-7f |
| t0048349 | 21 | 1 GTGAGGTAGTAGATTGTATAG    | miRNA | let-7f |
| t0048472 | 20 | 1 TAGGTAGTAGATTGTATAGA     | miRNA | let-7f |
| t0048478 | 22 | 1 TGAGGTAGTAGATTGTGTAGTG   | miRNA | let-7f |
| t0048543 | 22 | 1 TGAGGTAGTAGATTCTATAGGT   | miRNA | let-7f |
| t0048600 | 21 | 1 TGCGGTAGTAGATTGTATAGG    | miRNA | let-7f |
| t0048649 | 22 | 1 TGAGGTAGTAGTTTGTATATTT   | miRNA | let-7f |
| t0048850 | 20 | 1 TGAGGTAGTAGATTGTGTAT     | miRNA | let-7f |

|          |    |                             |       |        |
|----------|----|-----------------------------|-------|--------|
| t0048962 | 22 | 1 TGATGTAGTAGATTGTATAGCT    | miRNA | let-7f |
| t0049289 | 22 | 1 TGAGGTAGTAGTTTGTATAGGT    | miRNA | let-7f |
| t0049380 | 22 | 1 TGAGGTAGTCGTTTGTATAGTT    | miRNA | let-7f |
| t0049400 | 22 | 1 AAAGGTAGTAGATTGTATAGTT    | miRNA | let-7f |
| t0049519 | 21 | 1 TGAGGTAGTAGATTGTGTAGC     | miRNA | let-7f |
| t0049659 | 24 | 1 TGAGGTAGTAGACTGTATAGTTAA  | miRNA | let-7f |
| t0049771 | 20 | 1 TGAGGTAGTAGATTGTGTTG      | miRNA | let-7f |
| t0050134 | 22 | 1 TAGGGTAGTAGATTGTATAGTT    | miRNA | let-7f |
| t0050145 | 19 | 1 TGAGGTAGTACATTGTATA       | miRNA | let-7f |
| t0050201 | 21 | 1 GCGGTAGTAGATTGTATAGTT     | miRNA | let-7f |
| t0050541 | 22 | 1 TAAGGTAGTAGATCGTATAGTT    | miRNA | let-7f |
| t0050740 | 18 | 1 TGAGCTAGTAGATTGTAG        | miRNA | let-7f |
| t0050906 | 21 | 1 TAAGATAGTAGATTGTATAGT     | miRNA | let-7f |
| t0050981 | 23 | 1 TGATGTAGTAGATTGTATAGTTG   | miRNA | let-7f |
| t0051395 | 24 | 1 TGAGGTAGTAGATTGTATAGTAAG  | miRNA | let-7f |
| t0051423 | 22 | 1 TGAGGTAGTAGACTGTATAGCT    | miRNA | let-7f |
| t0051480 | 21 | 1 TGAAGTGGTAGATTGTATAGT     | miRNA | let-7f |
| t0051681 | 22 | 1 TGAGGTAGCAGATTGTATAGAT    | miRNA | let-7f |
| t0051966 | 20 | 1 TGAGGAAGTAGATTGTGTAG      | miRNA | let-7f |
| t0052133 | 23 | 1 TGAGGTAGTAGAATGTATAGTTG   | miRNA | let-7f |
| t0052175 | 22 | 1 TGAGGTATTAGATTGTGTAGTT    | miRNA | let-7f |
| t0052326 | 22 | 1 TTAGGTAGTAGATTGTTAGTT     | miRNA | let-7f |
| t0052330 | 22 | 1 TGAGGTCGCAGATTGTATAGTT    | miRNA | let-7f |
| t0052350 | 22 | 1 TGACGTAGTAGATTGTACAGTT    | miRNA | let-7f |
| t0052626 | 22 | 1 TGAGGTAGTAGATTATGTAGTT    | miRNA | let-7f |
| t0052655 | 25 | 1 TCAGGTAGTAGATTGTATAGTTACA | miRNA | let-7f |
| t0052741 | 22 | 1 TGATGTAGTAGATTGTATACTT    | miRNA | let-7f |
| t0053140 | 22 | 1 TCAGGTGGTAGATTGTATAGTT    | miRNA | let-7f |
| t0053183 | 24 | 1 TGAGGTAGTAGATTGTATTGTTTG  | miRNA | let-7f |
| t0053235 | 21 | 1 GTGGTAGTAGATTGTATAGTT     | miRNA | let-7f |
| t0053380 | 22 | 1 CGAGGTAGTAGATTGTATGGTT    | miRNA | let-7f |
| t0053471 | 22 | 1 TGAGGTAGTAGATCGCATAGTT    | miRNA | let-7f |
| t0053754 | 22 | 1 TGTGGTAGTAGATTGTATAGTA    | miRNA | let-7f |
| t0054022 | 21 | 1 TGAGGTAGTAGATGGTATGGT     | miRNA | let-7f |
| t0054252 | 20 | 1 TTAGGTAGTAGATTGTGTAG      | miRNA | let-7f |
| t0054344 | 22 | 1 TGAGGTAGTAGATTGCGTAGTT    | miRNA | let-7f |
| t0054508 | 22 | 1 TGAGGTAGTATCTTGTATAGTT    | miRNA | let-7f |
| t0054586 | 24 | 1 TGAGGTAGTAGACTGTATAGTTGA  | miRNA | let-7f |
| t0054631 | 21 | 1 TGTGGTAGTAGATTGTGTAGT     | miRNA | let-7f |
| t0054645 | 21 | 1 TGAGGTAGTAGATTGTGTCGT     | miRNA | let-7f |
| t0054787 | 23 | 1 TGAGGCGGTAGATTGTATAGTTG   | miRNA | let-7f |
| t0054815 | 21 | 1 TGAGGTAGTAGATCGTATAGG     | miRNA | let-7f |
| t0054900 | 22 | 1 TGAGGTAGTAGATTGTGTCGTT    | miRNA | let-7f |
| t0054993 | 23 | 1 TGAGGTAGTAGATTGTATAGTGG   | miRNA | let-7f |
| t0055009 | 23 | 1 TTGAGGTAGTAGAATGTATAGTT   | miRNA | let-7f |
| t0055100 | 21 | 1 TTGCGGAAGTAGATTGTATAG     | miRNA | let-7f |
| t0055111 | 21 | 1 TGAGGCAGTAGATTGTGTAGT     | miRNA | let-7f |
| t0055130 | 22 | 1 TGAAGTAGTCGATTGTATAGTT    | miRNA | let-7f |
| t0055262 | 21 | 1 TTGAGGTAGTAGATTGGATAG     | miRNA | let-7f |
| t0055356 | 20 | 1 TGAGGTAGCAGATTGTATAT      | miRNA | let-7f |
| t0055375 | 22 | 1 TGAGGTAGTAGATTGTACGGTT    | miRNA | let-7f |
| t0055556 | 24 | 1 TGAGGTAGTAGATTGGATAGTTGA  | miRNA | let-7f |
| t0055648 | 21 | 1 TGAGGTAGTAGATTGCCTAGT     | miRNA | let-7f |
| t0055651 | 21 | 1 TGAGGTAGTAGTTTGTATAGG     | miRNA | let-7f |
| t0055691 | 22 | 1 TGAAGTAGTAGATTGTATACTT    | miRNA | let-7f |
| t0055858 | 20 | 1 TGAGGTAGTAGATTGTGTAA      | miRNA | let-7f |
| t0055911 | 22 | 1 AGAGGTTGTAGATTGTATAGTT    | miRNA | let-7f |
| t0056007 | 21 | 1 TGAGGTCGTAGATTGTCTAGT     | miRNA | let-7f |

|          |    |                                  |       |        |
|----------|----|----------------------------------|-------|--------|
| t0056233 | 22 | 1 TGAGGTAGTAGATTGTTAATT          | miRNA | let-7f |
| t0056415 | 22 | 1 AGAGGTGGTAGATTGTATAGTT         | miRNA | let-7f |
| t0056420 | 22 | 1 TGAGCTAGTAGATTGTATAGGT         | miRNA | let-7f |
| t0056429 | 22 | 1 TGAGGCCGTAGATTGTATAGTT         | miRNA | let-7f |
| t0056497 | 22 | 1 TAAGGTAGTAGATTGTATACTT         | miRNA | let-7f |
| t0056596 | 22 | 1 TAAGGTAGTAGACTGTATAGTT         | miRNA | let-7f |
| t0056643 | 22 | 1 TGGGGTAGTAGATTGTATTGTT         | miRNA | let-7f |
| t0056794 | 21 | 1 TGACGTACTAGATTGTATAGT          | miRNA | let-7f |
| t0056895 | 22 | 1 TGAGGTAACAGATTGTATAGTT         | miRNA | let-7f |
| t0057141 | 21 | 1 AGTGGTAGTAGATTGTATAGT          | miRNA | let-7f |
| t0057148 | 22 | 1 ATGAGGTAGTAGATTATATAGT         | miRNA | let-7f |
| t0057553 | 21 | 1 AGAGGTGGTAGATTGTATAGT          | miRNA | let-7f |
| t0057660 | 24 | 1 TGAGGTAGTAGATTGTATAGTATA       | miRNA | let-7f |
| t0057853 | 22 | 1 TGAGGTAGTAGATTGTGTAGTC         | miRNA | let-7f |
| t0057855 | 20 | 1 CGAGGTAGTAGATCGTATAG           | miRNA | let-7f |
| t0057900 | 22 | 1 TTATGTAGTAGATTGTATAGTT         | miRNA | let-7f |
| t0058298 | 21 | 1 TGAGGTATTCGATTGTATAGT          | miRNA | let-7f |
| t0058408 | 18 | 1 TGAGGTAGTAGATTGTGG             | miRNA | let-7f |
| t0058499 | 22 | 1 TGAGGTAGTACATTGTATAGTA         | miRNA | let-7f |
| t0058923 | 24 | 1 TGAGGTAGTAGATAGTATAGTTAA       | miRNA | let-7f |
| t0058929 | 21 | 1 GAGGTAGTAGATCGTATAGTT          | miRNA | let-7f |
| t0058941 | 22 | 1 TGAGGTAGTAGATTGTCTCGTT         | miRNA | let-7f |
| t0059029 | 21 | 1 TAAGGTAGTAGATTGTGTAGT          | miRNA | let-7f |
| t0059179 | 21 | 1 AGGGGTAGTAGATTGTATAGT          | miRNA | let-7f |
| t0059283 | 24 | 1 TGAGGTAGAAGATTGTATAGTTTG       | miRNA | let-7f |
| t0059306 | 22 | 1 TGCGGAAGTAGATTGTATAGTT         | miRNA | let-7f |
| t0059323 | 18 | 1 AGGTAGTAGATTGTGTAG             | miRNA | let-7f |
| t0059341 | 22 | 1 TGAGGTAATATATTGTATAGTT         | miRNA | let-7f |
| t0059466 | 24 | 1 TTTGAGGCAGTAGATTGTATAGTT       | miRNA | let-7f |
| t0059491 | 22 | 1 TGAGGCAGTAGATTGTACAGTT         | miRNA | let-7f |
| t0059495 | 20 | 1 TGCGGTAGTAGATTGGATAG           | miRNA | let-7f |
| t0059610 | 23 | 1 TGAGGTAGTAGATTGTACAGTTT        | miRNA | let-7f |
| t0059787 | 21 | 1 CCAGGTAGTAGATTGTATAGT          | miRNA | let-7f |
| t0059808 | 21 | 1 TGAGGTGGTAGCTTGTATAGT          | miRNA | let-7f |
| t0059926 | 22 | 1 TGAGTTAGTATATTGTATAGTT         | miRNA | let-7f |
| t0060178 | 23 | 1 TGAGGTCGTAGATTGTATAGTAT        | miRNA | let-7f |
| t0060198 | 22 | 1 TGAGGTACTAGATTATATAGTT         | miRNA | let-7f |
| t0060453 | 23 | 1 TGAGGTAGTTCGATTGTATAGTTT       | miRNA | let-7f |
| t0060588 | 19 | 1 AGGTAGTAGATTGTCTAGT            | miRNA | let-7f |
| t0060605 | 22 | 1 ATGAGGTAGTAGATTGGATAGT         | miRNA | let-7f |
| t0060645 | 24 | 1 TGGGGTAGTAGATTGTATAGTTAA       | miRNA | let-7f |
| t0060701 | 21 | 1 TTAGGTAGTAGATTGTATAGA          | miRNA | let-7f |
| t0060810 | 21 | 1 TGTGGTAGTAGTTTGTATAGT          | miRNA | let-7f |
| t0060816 | 23 | 1 TGAGGTAGTAGATTGTATACTTA        | miRNA | let-7f |
| t0060877 | 21 | 1 TGAGGTAGTAGCTTATATAGT          | miRNA | let-7f |
| t0060907 | 21 | 1 TAGGAAGTAGATTGTATAGTT          | miRNA | let-7f |
| t0061102 | 22 | 1 TTTGAGGTAGTAGATTGTATCG         | miRNA | let-7f |
| t0061189 | 23 | 1 TGAGGTAGTAGATAGTATAGTTT        | miRNA | let-7f |
| t0061395 | 21 | 1 TGAGGTAGTAGAATGTATATT          | miRNA | let-7f |
| t0061625 | 41 | 1 TGAGGTAGTAGATTGTATAGTTTTGTTTGC | miRNA | let-7f |
| t0061675 | 22 | 1 TGAGGTAGTATATTGCATAGTT         | miRNA | let-7f |
| t0061720 | 22 | 1 TGAGGTAATAGATTGTATACTT         | miRNA | let-7f |
| t0061839 | 22 | 1 TGAGGTAATAGATTGTTTAGTT         | miRNA | let-7f |
| t0061890 | 21 | 1 GAGGTAATAGATTGTATAGTT          | miRNA | let-7f |
| t0062266 | 22 | 1 TGAGGTAGTAGACTGTATAGTG         | miRNA | let-7f |
| t0062388 | 22 | 1 TGAGATAGTAGATTGTATAATT         | miRNA | let-7f |
| t0062544 | 20 | 1 TGAGGTGGAAGATTGTATAG           | miRNA | let-7f |
| t0062576 | 21 | 1 TTGAGGTAGTAGATTGCATAG          | miRNA | let-7f |

|          |    |                                  |       |        |
|----------|----|----------------------------------|-------|--------|
| t0062589 | 21 | 1 GAGGTAGTAGATTGTATTGTT          | miRNA | let-7f |
| t0062670 | 22 | 1 CTAGGTAGTAGATTGTATAGTT         | miRNA | let-7f |
| t0062761 | 22 | 1 TTAGGTAGTATATTGTATAGTT         | miRNA | let-7f |
| t0062762 | 21 | 1 TGAGGTGGCAGATTGTATAGT          | miRNA | let-7f |
| t0062861 | 21 | 1 TGAGGTTGTAGATTGTATAGA          | miRNA | let-7f |
| t0063001 | 21 | 1 CGAGGTAGTAGATCGTATAGT          | miRNA | let-7f |
| t0063011 | 22 | 1 TTAGGTAGTAGATTATATAGTT         | miRNA | let-7f |
| t0063047 | 20 | 1 TGGAGTAGTAGATTGTATAG           | miRNA | let-7f |
| t0063074 | 23 | 1 TGACGTAGTAGATTGTATAGTTA        | miRNA | let-7f |
| t0063157 | 22 | 1 TGAGGTAGAAGATTATATAGTT         | miRNA | let-7f |
| t0063293 | 21 | 1 TGAGGTGGTAGATTGCATAGT          | miRNA | let-7f |
| t0063458 | 44 | 1 TGAGGTAGTAGATTGTATAGTTTGGTTTGC | miRNA | let-7f |
| t0063603 | 22 | 1 TGAGGTAGCAGATTGTCTAGTT         | miRNA | let-7f |
| t0063621 | 20 | 1 TGAGGTAGTAGATTGGGTAG           | miRNA | let-7f |
| t0063678 | 21 | 1 TGGGGTAGTAGATTGTATCGT          | miRNA | let-7f |
| t0063699 | 21 | 1 GAGGTAGTAGATTGTACAGTT          | miRNA | let-7f |
| t0063708 | 22 | 1 CGAGGTAGTAGATTGTAAAGTT         | miRNA | let-7f |
| t0063823 | 24 | 1 TGAGGTAGTAGATTGTATAGTTCA       | miRNA | let-7f |
| t0063838 | 22 | 1 TGACGTAGTAGATTGTATAGTA         | miRNA | let-7f |
| t0063843 | 21 | 1 CGCGGTAGTAGATTGTATAGT          | miRNA | let-7f |
| t0063955 | 21 | 1 TGAGGTAGTAGCTTGATACT           | miRNA | let-7f |
| t0064129 | 22 | 1 TGAGGTAGTAGAATGTATAGTA         | miRNA | let-7f |
| t0064318 | 21 | 1 TGAGGTAGTAGATTGTCTTGT          | miRNA | let-7f |
| t0064392 | 22 | 1 CGAGGTAGTAGATTGTATAGTG         | miRNA | let-7f |
| t0064457 | 22 | 1 TGAGGTAGTAGATTATATATTT         | miRNA | let-7f |
| t0064462 | 22 | 1 GTTTGGAGGTAGTAGATTGTATC        | miRNA | let-7f |
| t0064482 | 22 | 1 TCAGGTAGTAGATTGTATGGTT         | miRNA | let-7f |
| t0064512 | 44 | 1 TGAGGTAGTAGATTGTATAGTTTCGTATAC | miRNA | let-7f |
| t0064569 | 20 | 1 TGGTAGTAGATTGGATAGTT           | miRNA | let-7f |
| t0064723 | 21 | 1 TGACGTAGTAGCTTGTATAGT          | miRNA | let-7f |
| t0064871 | 22 | 1 TGACGTAGTAGATTGTATAGTG         | miRNA | let-7f |
| t0064957 | 23 | 1 ATGAGGAAGTAGATTGTATAGTT        | miRNA | let-7f |
| t0065059 | 22 | 1 TGAGGCCGTAGATTGTATAGTT         | miRNA | let-7f |
| t0065084 | 21 | 1 TGAGGTAGTAGATTGGATGGT          | miRNA | let-7f |
| t0065120 | 22 | 1 ATGAGGAAGTAGATTGTATAGT         | miRNA | let-7f |
| t0065282 | 22 | 1 TGAGGAAGAAGATTGTATAGTT         | miRNA | let-7f |
| t0065304 | 19 | 1 TGAAGTAGTAGATTGTATA            | miRNA | let-7f |
| t0065390 | 23 | 1 TCAGGTAGTAGATTGTATAGTAA        | miRNA | let-7f |
| t0065426 | 22 | 1 TGAGGTAGTAGCTTGTCTAGTT         | miRNA | let-7f |
| t0065520 | 22 | 1 TTGAGGTAGTAGATTGGATAGT         | miRNA | let-7f |
| t0065660 | 22 | 1 CTGAGGTGGTAGATTGTATAGT         | miRNA | let-7f |
| t0065845 | 22 | 1 TGAGCTAGTAGATTGTATAGCT         | miRNA | let-7f |
| t0065999 | 23 | 1 TGAGGTAGTAGATCGTATAGTTG        | miRNA | let-7f |
| t0066196 | 18 | 1 TGAGGCAGTAGATTGTAT             | miRNA | let-7f |
| t0066204 | 22 | 1 TGAGGTAGTCGATTGTGTAGTT         | miRNA | let-7f |
| t0066255 | 23 | 1 ATGAGGTAGTAGATTGGATAGTT        | miRNA | let-7f |
| t0066394 | 23 | 1 TGGGGTAGTAGATTGTATAGTAA        | miRNA | let-7f |
| t0066412 | 21 | 1 AGAGGTAGTAGATTGTATAGA          | miRNA | let-7f |
| t0066443 | 22 | 1 TGACATAGTAGATTGTATAGTT         | miRNA | let-7f |
| t0066963 | 22 | 1 TGATGTAGTAGATTGTATAGGT         | miRNA | let-7f |
| t0067072 | 21 | 1 TTGAGGTTGTAGATTGTATAG          | miRNA | let-7f |
| t0067119 | 22 | 1 TGAGACAGTAGATTGTATAGTT         | miRNA | let-7f |
| t0067187 | 20 | 1 CAGGTAGTAGATTGTATCGT           | miRNA | let-7f |
| t0067276 | 21 | 1 TTAGGTAGTAGATTGTATCGT          | miRNA | let-7f |
| t0067405 | 22 | 1 GGAGGTGGTAGATTGTATAGTT         | miRNA | let-7f |
| t0067428 | 21 | 1 TGAGGTAGTAGATTATATAAT          | miRNA | let-7f |
| t0067481 | 22 | 1 TGAGGCAGTAGCTTGTATAGTT         | miRNA | let-7f |
| t0067786 | 28 | 1 TGAGGTAGTAGATTGCATAGTTGGTAGT   | miRNA | let-7f |

|          |    |                                  |       |        |
|----------|----|----------------------------------|-------|--------|
| t0067839 | 22 | 1 TGAGGTGGCAGATTGTATAGTT         | miRNA | let-7f |
| t0067938 | 22 | 1 TGAGCTAGTAGATTGTATATTT         | miRNA | let-7f |
| t0067941 | 26 | 1 TGAGGCAGTAGATTGTATAGTTAAAA     | miRNA | let-7f |
| t0067967 | 22 | 1 TGGGGTAGTAGATTGTATAGAT         | miRNA | let-7f |
| t0068076 | 22 | 1 TCAGGTAGTCGATTGTATAGTT         | miRNA | let-7f |
| t0068094 | 25 | 1 TGAGGTAGTAGATTGTATAGTTGGG      | miRNA | let-7f |
| t0068143 | 19 | 1 CAGGTAGTAGATTGTATAG            | miRNA | let-7f |
| t0068293 | 22 | 1 TGCGGTAGTATATTGTATAGTT         | miRNA | let-7f |
| t0068376 | 21 | 1 TGAGGTAGTAGATTCTGTAGT          | miRNA | let-7f |
| t0068554 | 21 | 1 TTGAGGTAGTAGACTGTATAG          | miRNA | let-7f |
| t0068681 | 21 | 1 TGAGCTAGTAGATTGTATCGT          | miRNA | let-7f |
| t0068709 | 23 | 1 TGAGGTAGTAGATTGTATGGTTT        | miRNA | let-7f |
| t0068973 | 21 | 1 TGAGGTAGTAGATCATATAGT          | miRNA | let-7f |
| t0069035 | 20 | 1 GAGGTAGTAGACTGTATAGT           | miRNA | let-7f |
| t0069065 | 20 | 1 TGCGGTAGTAGATTGTTTAG           | miRNA | let-7f |
| t0069119 | 20 | 1 TGGGGTAGTAGATTGTATCG           | miRNA | let-7f |
| t0069206 | 21 | 1 GAGGTAGTAGATTGCATAGTT          | miRNA | let-7f |
| t0069467 | 22 | 1 CGAGGTAGTAGACTGTATAGTT         | miRNA | let-7f |
| t0069634 | 22 | 1 TAAGGTAATAGATTGTATAGTT         | miRNA | let-7f |
| t0069714 | 23 | 1 TGAGGTATTAGATTGTATAGTTA        | miRNA | let-7f |
| t0069787 | 21 | 1 CGAGGTAGTAGATTGTATAAT          | miRNA | let-7f |
| t0069823 | 22 | 1 CGAGGTAGTAGATTCTATAGTT         | miRNA | let-7f |
| t0069866 | 22 | 1 TGATGTACTAGATTGTATAGTT         | miRNA | let-7f |
| t0069903 | 21 | 1 GAGGTAGTAGTTTGTATAGTT          | miRNA | let-7f |
| t0069987 | 22 | 1 TGATGTAGAAGATTGTATAGTT         | miRNA | let-7f |
| t0070054 | 22 | 1 TGATGTAGTAGATTGTGTAGTT         | miRNA | let-7f |
| t0070207 | 22 | 1 TGAGGTAGTAGATAGTATAGAT         | miRNA | let-7f |
| t0070279 | 20 | 1 TGAGGTAGCAGATTGTGTAG           | miRNA | let-7f |
| t0070338 | 22 | 1 TGAGGTGGTAGATTGTACAGTT         | miRNA | let-7f |
| t0070387 | 22 | 1 TGAGGTAGTAGATTATACAGTT         | miRNA | let-7f |
| t0070408 | 22 | 1 CGAGGTAGTAGATTGTATATTT         | miRNA | let-7f |
| t0070409 | 21 | 1 TGAGGTCGTAGATTGTATACT          | miRNA | let-7f |
| t0070428 | 22 | 1 TTGGGTAGTAGATTGTATAGTT         | miRNA | let-7f |
| t0070497 | 22 | 1 TTAGGAAGTAGATTGTATAGTT         | miRNA | let-7f |
| t0070527 | 22 | 1 TAAGGAAGTAGATTGTATAGTT         | miRNA | let-7f |
| t0070539 | 24 | 1 TGAGGTAGTAGATTGTGTAGTTAA       | miRNA | let-7f |
| t0070550 | 21 | 1 TGAGGTAGTAGCTTGTATTGT          | miRNA | let-7f |
| t0070643 | 41 | 1 TGAGGTAGTAGATTGTTTGGTTTGGTTTGC | miRNA | let-7f |
| t0070722 | 22 | 1 ATGAGGTAGAAGATTGTATAGT         | miRNA | let-7f |
| t0070761 | 22 | 1 TGAGGTAGTAGCTTGTATACTT         | miRNA | let-7f |
| t0070770 | 22 | 1 TGAGGTGGTAGATTGTATCGTT         | miRNA | let-7f |
| t0070811 | 22 | 1 TAAGGTAGCAGATTGTATAGTT         | miRNA | let-7f |
| t0070976 | 21 | 1 TGGGGTAGTAGATTGTGTAGT          | miRNA | let-7f |
| t0071042 | 21 | 1 TGAGATAGTAGATTGTATTGT          | miRNA | let-7f |
| t0071156 | 20 | 1 GAGGTGGTAGATTGTATAGT           | miRNA | let-7f |
| t0071255 | 21 | 1 TTGGGTAGTAGATTGTATAGT          | miRNA | let-7f |
| t0071298 | 23 | 1 TGAGGTGGTATATTGTATAGTTA        | miRNA | let-7f |
| t0071309 | 22 | 1 TGGGGTAGTATATTGTATAGTT         | miRNA | let-7f |
| t0071436 | 22 | 1 TGAGGAAGTAAATTGTATAGTT         | miRNA | let-7f |
| t0071449 | 21 | 1 GAGGTAGTAGATTGTATAGAT          | miRNA | let-7f |
| t0071639 | 22 | 1 TGAGGTGGTAGATTGTGTAGTT         | miRNA | let-7f |
| t0071710 | 22 | 1 GGAGGTAGTAGATTGTATAATT         | miRNA | let-7f |
| t0071729 | 21 | 1 TGAGGTAGTAGATTGTCCAGT          | miRNA | let-7f |
| t0071830 | 22 | 1 AGAGGTAGTAGACTGTATAGTT         | miRNA | let-7f |
| t0072052 | 21 | 1 GTAGTAGTTTGTATAGTTGAG          | miRNA | let-7f |
| t0072053 | 23 | 1 TGAGGTAGTAGATTGTGTAGTAA        | miRNA | let-7f |
| t0072067 | 18 | 1 CGAGGTAGTAGATTGTAT             | miRNA | let-7f |
| t0072104 | 22 | 1 TAAGGTAGTAGATTGTATAGAT         | miRNA | let-7f |

|          |    |                             |       |        |
|----------|----|-----------------------------|-------|--------|
| t0072114 | 22 | 1 TGAGGTGATAGATTGTATAGTT    | miRNA | let-7f |
| t0072267 | 22 | 1 ATGAGGTAGTAGATTGTCTAGT    | miRNA | let-7f |
| t0072275 | 22 | 1 TGTGGTAGTAGATTGTATTGTT    | miRNA | let-7f |
| t0072315 | 22 | 1 GGAGGTAGTAGATTGTATAGTA    | miRNA | let-7f |
| t0072447 | 22 | 1 TGAGGTATTAGATTGTATCGTT    | miRNA | let-7f |
| t0072679 | 24 | 1 TGAGGTAGTAGATTGTATAGTTAC  | miRNA | let-7f |
| t0072686 | 20 | 1 AGGAAGTAGATTGTATAGTT      | miRNA | let-7f |
| t0072901 | 22 | 1 TAAGGCAGTAGATTGTATAGTT    | miRNA | let-7f |
| t0073304 | 22 | 1 TGAGGAAGTAGATTTTATAGTT    | miRNA | let-7f |
| t0073315 | 21 | 1 TGAGGTAGTAGCTTGGATAGT     | miRNA | let-7f |
| t0073474 | 25 | 1 TGAGGTAGTAGATTATATAGTCGTC | miRNA | let-7f |
| t0073637 | 21 | 1 TGATGTAGTAGCTTGTATAGT     | miRNA | let-7f |
| t0073638 | 22 | 1 TGAGGTAGTAGATTGTCTAGAT    | miRNA | let-7f |
| t0073994 | 22 | 1 TGATGTAGTAGCTTGTATAGTT    | miRNA | let-7f |
| t0074225 | 23 | 1 TGAGGTCGTAGATTGTATAGTTT   | miRNA | let-7f |
| t0074230 | 23 | 1 CTGAAGTAGTAGATTGTATAGTT   | miRNA | let-7f |
| t0074283 | 22 | 1 TGAGGTGGTAGATTGTATAGTC    | miRNA | let-7f |
| t0074312 | 23 | 1 ACGAGGTAGTAGATTGTATAGTT   | miRNA | let-7f |
| t0074403 | 21 | 1 TGAGGAACTAGATTGTATAGT     | miRNA | let-7f |
| t0074407 | 21 | 1 TGAGGTAGTAGATTGCGTAGT     | miRNA | let-7f |
| t0074532 | 22 | 1 TGAGGTAGTAGATAGTATCGTT    | miRNA | let-7f |
| t0074726 | 22 | 1 TGAGGTGGTAGATTGTATACTT    | miRNA | let-7f |
| t0074888 | 23 | 1 AGAGGTAGTAGATTGTATAGTTG   | miRNA | let-7f |
| t0075264 | 22 | 1 TGAGGTAGTAGAATGCATAGTT    | miRNA | let-7f |
| t0075321 | 21 | 1 TGAGGTAGTAGATTCTAGAGT     | miRNA | let-7f |
| t0075426 | 25 | 1 TGAGGTAGTAGATTGTGTAGTTGTG | miRNA | let-7f |
| t0075498 | 22 | 1 TGTGGTAGTAGATTGTATGGTT    | miRNA | let-7f |
| t0075584 | 20 | 1 TCAGGTAGTAGATTTTATAG      | miRNA | let-7f |
| t0075591 | 24 | 1 TGAGGTAGTAGATTGTATAGTTCCG | miRNA | let-7f |
| t0076049 | 21 | 1 GAGGTAGAAGATTGTATAGTT     | miRNA | let-7f |
| t0076067 | 22 | 1 GAGGTAGTAGATTGTATCGTTT    | miRNA | let-7f |
| t0076097 | 21 | 1 TGAGGTAGTAGTTTCTATAGT     | miRNA | let-7f |
| t0076190 | 22 | 1 TGAGGTAGTAGATTGTGTAGCT    | miRNA | let-7f |
| t0076226 | 18 | 1 TGGGGTAGTAGATTGTAT        | miRNA | let-7f |
| t0076293 | 22 | 1 TGAGGTAGCAGACTGTATAGTT    | miRNA | let-7f |
| t0076553 | 20 | 1 TTAGGCAGTAGATTGTATAG      | miRNA | let-7f |
| t0076663 | 21 | 1 TGAGGTAGCAGATTGTATCGT     | miRNA | let-7f |
| t0076802 | 22 | 1 TGAGGAAGTAGAATGTATAGTT    | miRNA | let-7f |
| t0076937 | 21 | 1 TGAGGTAGTAGATTGGATTGT     | miRNA | let-7f |
| t0076941 | 22 | 1 TGAGGTAGTAGATTGTACAGTC    | miRNA | let-7f |
| t0077130 | 22 | 1 TGAGGAAGTAGATTATATAGTT    | miRNA | let-7f |
| t0077173 | 21 | 1 TGAGGTAGTAGTTTGTGTAGT     | miRNA | let-7f |
| t0077308 | 21 | 1 TGAGGTAGTAGCTTGTATATT     | miRNA | let-7f |
| t0077392 | 21 | 1 TGAGGTAGTAGCTTGTATAGC     | miRNA | let-7f |
| t0077417 | 21 | 1 GAGGTAGTAGATTGTATAGCT     | miRNA | let-7f |
| t0077462 | 20 | 1 TGAGGTAGTAGATCATATAG      | miRNA | let-7f |
| t0077523 | 22 | 1 CGAGGTCGTAGATTGTATAGTT    | miRNA | let-7f |
| t0077736 | 23 | 1 TTGAGGTAGTAGATTGTATATTT   | miRNA | let-7f |
| t0077946 | 22 | 1 TGCGGTAGTCGATTGTATAGTT    | miRNA | let-7f |
| t0078003 | 24 | 1 TGCGGTAGTAGATTGTATAGTTGA  | miRNA | let-7f |
| t0078383 | 19 | 1 TGAGGTCGTAGATTGTATA       | miRNA | let-7f |
| t0078501 | 22 | 1 TGGGGTAGTAGATTGTTTAGTT    | miRNA | let-7f |
| t0078585 | 22 | 1 TGAGGAAGTAGATTGTAAAGTT    | miRNA | let-7f |
| t0078601 | 21 | 1 TGAGCTAGTAGATTGTACAGT     | miRNA | let-7f |
| t0078723 | 20 | 1 TGAGGTGGTACATTGTATAG      | miRNA | let-7f |
| t0078797 | 22 | 1 TGAAGTAGTAGTTTGTATAGTT    | miRNA | let-7f |
| t0078808 | 22 | 1 TGAGGTAGTAGAGTGTATAGTA    | miRNA | let-7f |
| t0078866 | 22 | 1 CGAGGTAGTACATTGTATAGTT    | miRNA | let-7f |

|          |    |                                 |       |        |
|----------|----|---------------------------------|-------|--------|
| t0078914 | 25 | 1 TGAGGTAGTAGATTGTATAGTTTTG     | miRNA | let-7f |
| t0079211 | 22 | 1 TGAGGTAGTAGATTATATAGGT        | miRNA | let-7f |
| t0079803 | 22 | 1 TGAGGAAGTAGATTGTACAGTT        | miRNA | let-7f |
| t0079807 | 22 | 1 CTGAGGTAGTAGATTGTATAGC        | miRNA | let-7f |
| t0079836 | 22 | 1 TGAGGTAGTAGATCATATAGTT        | miRNA | let-7f |
| t0079839 | 21 | 1 TGAGGTAGTAGTTTGGATAGT         | miRNA | let-7f |
| t0079881 | 22 | 1 TGAGGTAGAAGATTGTACAGTT        | miRNA | let-7f |
| t0079949 | 24 | 1 ATGAGGCAGTAGATTGTATAGTTT      | miRNA | let-7f |
| t0080232 | 20 | 1 GAGGTAGTAGCTTGTATAGT          | miRNA | let-7f |
| t0080521 | 22 | 1 TCAGGAAGTAGATTGTATAGTT        | miRNA | let-7f |
| t0080830 | 21 | 1 TGAGGTAGCAGAATGTATAGT         | miRNA | let-7f |
| t0081033 | 18 | 1 TGAGCTAGTAGATTGTAT            | miRNA | let-7f |
| t0081071 | 21 | 1 TGAGGTAGTAGATCGTATTGT         | miRNA | let-7f |
| t0081415 | 22 | 1 TGAGGTAGTAGCTTGTATTGTT        | miRNA | let-7f |
| t0081454 | 21 | 1 TGAGGAAGAAGATTGTATAGT         | miRNA | let-7f |
| t0081481 | 24 | 1 TGAGGTAGTAGCTTGTATAGTTAA      | miRNA | let-7f |
| t0081542 | 22 | 1 TGAGGTAGTATATTGTAAAGTT        | miRNA | let-7f |
| t0081662 | 19 | 1 GGAGGTAGCAGATTGTATA           | miRNA | let-7f |
| t0081724 | 22 | 1 TGAGGTAGAAGTTTGTATAGTT        | miRNA | let-7f |
| t0081734 | 23 | 1 ATGAGGTGGTAGATTGTATAGTT       | miRNA | let-7f |
| t0081746 | 21 | 1 TGAGGTAGAAGATTGTATTGT         | miRNA | let-7f |
| t0081797 | 21 | 1 TGAGGTCGTAGATTGTATAGC         | miRNA | let-7f |
| t0081817 | 22 | 1 TGAGGTAATAGATTGTATGGTT        | miRNA | let-7f |
| t0082045 | 21 | 1 TGAGGTAGCAGATTGTATAGG         | miRNA | let-7f |
| t0082064 | 20 | 1 TGAGGTCGTAGCTTGTATAG          | miRNA | let-7f |
| t0082095 | 22 | 1 ATGAGGTAGTAGATTGTATAGG        | miRNA | let-7f |
| t0082259 | 22 | 1 TGAGGTGGTAGATTGTATATTT        | miRNA | let-7f |
| t0082308 | 21 | 1 TGAGGTTGTAGATTGTATAGG         | miRNA | let-7f |
| t0082340 | 22 | 1 TGAGGTAGTAGATTGTCCAGTT        | miRNA | let-7f |
| t0082506 | 20 | 1 GAGGAAGTAGATTGGATAGT          | miRNA | let-7f |
| t0082520 | 22 | 1 TGGGGTAGAAGATTGTATAGTT        | miRNA | let-7f |
| t0082592 | 23 | 1 TGAGGTAATAGATTGTATAGTTT       | miRNA | let-7f |
| t0082618 | 21 | 1 TGAGGTGGTAGATTGTATAGA         | miRNA | let-7f |
| t0082825 | 22 | 1 TGAGGTAGTAGAGGGTATAGTT        | miRNA | let-7f |
| t0082855 | 22 | 1 TGAGGTATTAGATTGTACAGTT        | miRNA | let-7f |
| t0083017 | 22 | 1 TGAGGAAGTAGACTGTATAGTT        | miRNA | let-7f |
| t0083035 | 25 | 1 TGAGGTAGTAGATTCTATAGTTATC     | miRNA | let-7f |
| t0083077 | 22 | 1 TGAGGTAGTAGATTGTTTAGAT        | miRNA | let-7f |
| t0083103 | 23 | 1 CTGAGGAAGTAGATTGTATAGTT       | miRNA | let-7f |
| t0083121 | 22 | 1 TGAGGTAGTAGATTGTACAGTG        | miRNA | let-7f |
| t0083145 | 19 | 1 TGAGGTAGTAGATCGTATT           | miRNA | let-7f |
| t0083361 | 22 | 1 TGAGGTAGTAGATTGTTTATTT        | miRNA | let-7f |
| t0083390 | 22 | 1 TGGGGTAGTAGATTGTATAGTA        | miRNA | let-7f |
| t0083400 | 21 | 1 TGATGTAGTAGATTGTATCGT         | miRNA | let-7f |
| t0083510 | 18 | 1 TGAGGTAGTAGATTGCAG            | miRNA | let-7f |
| t0083544 | 23 | 1 TGAGGTAGTAAATTGTATAGTTT       | miRNA | let-7f |
| t0083555 | 21 | 1 TAAGGTAGTAGATCGTATAGT         | miRNA | let-7f |
| t0083574 | 22 | 1 TGGGGTAGCAGATTGTATAGTT        | miRNA | let-7f |
| t0083772 | 28 | 1 TGAGGTAGTAGATTGTATAGTCCGAACGG | miRNA | let-7f |
| t0083839 | 22 | 1 TTGAGGTAGTAGATTGTCTAGT        | miRNA | let-7f |
| t0084001 | 22 | 1 CTGAGGCAGTAGATTGTATAGT        | miRNA | let-7f |
| t0084160 | 22 | 1 GAGGCAGTAGATTGTATAGTTA        | miRNA | let-7f |
| t0084335 | 22 | 1 TGAGGTAGTAGTTTGCATAGTT        | miRNA | let-7f |
| t0084365 | 21 | 1 CGAGGTTGTAGATTGTATAGT         | miRNA | let-7f |
| t0084465 | 26 | 1 TGAGGTAGTAGATTGTATAGTTAATC    | miRNA | let-7f |
| t0084495 | 20 | 1 TAAGGAAGTAGATTGTATAG          | miRNA | let-7f |
| t0084498 | 22 | 1 TGATGTAGTAGAATGTATAGTT        | miRNA | let-7f |
| t0084568 | 22 | 1 CGAGGTAGTTGATTGTATAGTT        | miRNA | let-7f |

|          |    |                                  |       |        |
|----------|----|----------------------------------|-------|--------|
| t0084619 | 21 | 1 TAAGGTAGTAGATTATATAGT          | miRNA | let-7f |
| t0084697 | 21 | 1 TGTGGTAGTAGATTGTATCGT          | miRNA | let-7f |
| t0085038 | 21 | 1 TGAGGTAGTAGATTGGATAGG          | miRNA | let-7f |
| t0085334 | 20 | 1 AGGTAGCAGATTGTATAGTT           | miRNA | let-7f |
| t0085364 | 22 | 1 TGGGGTAGTAGATTATATAGTT         | miRNA | let-7f |
| t0085369 | 21 | 1 TAGGTAGTAGATTATATAGTT          | miRNA | let-7f |
| t0085535 | 22 | 1 TGAGGTAGTAGCTTCTATAGTT         | miRNA | let-7f |
| t0085571 | 22 | 1 TGAGGTAGAAGATTGTATCGTT         | miRNA | let-7f |
| t0085751 | 20 | 1 GAGGCAGTAGATTGTATAGT           | miRNA | let-7f |
| t0085842 | 44 | 1 TGAGGTAGTAGATTGTATAGTTTCGTTTGC | miRNA | let-7f |
| t0085912 | 22 | 1 TGATGTAGTAGATTTTATAGTT         | miRNA | let-7f |
| t0086257 | 21 | 1 TGGGGTAGTAGATTGTATACT          | miRNA | let-7f |
| t0086286 | 20 | 1 TGAGGTTGTAGATTGTATAT           | miRNA | let-7f |
| t0086592 | 22 | 1 TGAGGTAGTAGTTTGGATAGTT         | miRNA | let-7f |
| t0086597 | 22 | 1 GGAAGTAGTAGATTGTATAGTT         | miRNA | let-7f |
| t0086628 | 21 | 1 TGAGGTAGTAGTCTGTATAGT          | miRNA | let-7f |
| t0086691 | 20 | 1 TGGGGAAGTAGATTGTATAG           | miRNA | let-7f |
| t0086721 | 22 | 1 TGTGGAAGTAGATTGTATAGTT         | miRNA | let-7f |
| t0086727 | 22 | 1 TGAGATAGCAGATTGTATAGTT         | miRNA | let-7f |
| t0086747 | 21 | 1 AAGGTAGTAGATTGTATAGTT          | miRNA | let-7f |
| t0086827 | 22 | 1 TGAGGTAGTAGAGTGTATAGGT         | miRNA | let-7f |
| t0086890 | 21 | 1 TTAAGGTAGTAGATTGTATAG          | miRNA | let-7f |
| t0087001 | 21 | 1 GTTGAGGCAGTAGATTGTATA          | miRNA | let-7f |
| t0087059 | 23 | 1 TGAGCTAGTAGATTGTATAGTTG        | miRNA | let-7f |
| t0087152 | 22 | 1 TGAGGTCGTAGATTGTATAGCT         | miRNA | let-7f |
| t0087198 | 21 | 1 TGAGGTAGTAGATTGTTTAGG          | miRNA | let-7f |
| t0087264 | 22 | 1 CGAGGTAGTAGATTATATAGTT         | miRNA | let-7f |
| t0087276 | 20 | 1 TTAGGTAGTAGATTGTCTAG           | miRNA | let-7f |
| t0087282 | 22 | 1 GAGGTAGTAGATTGTATCGTTG         | miRNA | let-7f |
| t0087321 | 21 | 1 TGAGGTAGTAGATTGTGTAGA          | miRNA | let-7f |
| t0087436 | 22 | 1 TGTGATAGTAGATTGTATAGTT         | miRNA | let-7f |
| t0087537 | 21 | 1 TTGAGGTAGTAGATTGTATAT          | miRNA | let-7f |
| t0087546 | 21 | 1 ATAGGTAGTAGATTGTATAGT          | miRNA | let-7f |
| t0087590 | 21 | 1 TTGAGGTATTAGATTGTATAG          | miRNA | let-7f |
| t0087609 | 22 | 1 TGAGGTAAGTAGATTGTGTAGTT        | miRNA | let-7f |
| t0087751 | 20 | 1 TAGGTAGTAGCTTGTATAGT           | miRNA | let-7f |
| t0088026 | 22 | 1 TGCGGTAGTAGACTGTATAGTT         | miRNA | let-7f |
| t0088070 | 22 | 1 TGAGGTAGAAGATTTTATAGTT         | miRNA | let-7f |
| t0088096 | 22 | 1 TGAGGCAGAAGATTGTATAGTT         | miRNA | let-7f |
| t0088107 | 19 | 1 TGAGCTAGTATATTGTATA            | miRNA | let-7f |
| t0088113 | 22 | 1 CGAGGTAGTAGATTGTATAGCT         | miRNA | let-7f |
| t0088243 | 21 | 1 TGAGGTAGTAGATTGTCTCGT          | miRNA | let-7f |
| t0088322 | 21 | 1 TGAGGTAGTAGCTTGTATAGG          | miRNA | let-7f |
| t0088376 | 22 | 1 TTGAGGTGGTAGATTGTATAGT         | miRNA | let-7f |
| t0088476 | 22 | 1 TGTGGTAGTAGATTGTATAGAT         | miRNA | let-7f |
| t0088514 | 21 | 1 TGAGGTAGTAGATGGGATAGT          | miRNA | let-7f |
| t0088606 | 22 | 1 TGAGGTGGTAGATTGTTAGTT          | miRNA | let-7f |
| t0088750 | 22 | 1 TGAGGTAGTAGATTGCATAGCT         | miRNA | let-7f |
| t0088949 | 22 | 1 TGAGGTAGTAGATTGGATAGAT         | miRNA | let-7f |
| t0088980 | 21 | 1 TTGAGCTAGTAGATTGTATAG          | miRNA | let-7f |
| t0089202 | 22 | 1 GAGGTAGTAGATTGGATAGTTA         | miRNA | let-7f |
| t0089265 | 23 | 1 TGAGGTAGTAGATAGTATAGTTG        | miRNA | let-7f |
| t0089328 | 22 | 1 TGAGGTTATAGATTGTATAGTT         | miRNA | let-7f |
| t0089549 | 20 | 1 TGAGGAAGTAGATTATATAG           | miRNA | let-7f |
| t0089602 | 22 | 1 TGAGGTAGTAGATTGTCTAGCT         | miRNA | let-7f |
| t0089709 | 22 | 1 TGAGGTAGAAGATTGCATAGTT         | miRNA | let-7f |
| t0089743 | 23 | 1 TGAGATAGTAGATTGTATAGTTG        | miRNA | let-7f |
| t0089777 | 22 | 1 TGGGGTAGTAGACTGTATAGTT         | miRNA | let-7f |



|          |    |                             |       |        |
|----------|----|-----------------------------|-------|--------|
| t0089869 | 23 | 1 ATGAGGTAGAAGATTGTATAGTG   | miRNA | let-7f |
| t0089952 | 21 | 1 TGATGTAGTAGATTGCATAGT     | miRNA | let-7f |
| t0090031 | 22 | 1 TGAGGTCGTAGATTGTATAGGT    | miRNA | let-7f |
| t0090073 | 21 | 1 TGAGGTAGTAGATCGTATAGC     | miRNA | let-7f |
| t0090141 | 19 | 1 TGACGTAGTAGATTGTATA       | miRNA | let-7f |
| t0090212 | 22 | 1 TGAGGTAGTAAATTTTATAGTT    | miRNA | let-7f |
| t0090333 | 22 | 1 TGAGGTAGTATATTGTATAGTA    | miRNA | let-7f |
| t0090545 | 22 | 1 TGAGCTAGTAGATTGTACAGTT    | miRNA | let-7f |
| t0090580 | 23 | 1 ATGCGGTAGTAGATTGTATAGTT   | miRNA | let-7f |
| t0091086 | 22 | 1 TGAGGTAGTAGACTATATAGTT    | miRNA | let-7f |
| t0091093 | 19 | 1 CGAGGTAGTAGATTGTATT       | miRNA | let-7f |
| t0091119 | 20 | 1 TTAGGTAGTAGATTGTAAAG      | miRNA | let-7f |
| t0091209 | 22 | 1 TGAGGTAGTAGTTTGTTTAGTT    | miRNA | let-7f |
| t0091363 | 21 | 1 GGTAGTAGATTGTATAGTTGG     | miRNA | let-7f |
| t0091601 | 20 | 1 TGAGGAACTAGATTGTATAG      | miRNA | let-7f |
| t0091697 | 23 | 1 TGAGGTAGTAGAATGTATAGTTT   | miRNA | let-7f |
| t0091771 | 19 | 1 TGAGGTAGTAGATGGTATA       | miRNA | let-7f |
| t0091940 | 22 | 1 TGAGTTAGTAGATTGTACAGTT    | miRNA | let-7f |
| t0091959 | 22 | 1 TGCGGTAGTAGATTGTATGGTT    | miRNA | let-7f |
| t0092000 | 23 | 1 AGAGGTAGTAGATTGTATAGTTT   | miRNA | let-7f |
| t0092133 | 21 | 1 GAGGTTGTAGATTGTATAGTT     | miRNA | let-7f |
| t0092179 | 20 | 1 TGAGGTAGGAGAATGTATAG      | miRNA | let-7e |
| t0092325 | 20 | 1 TGAGGTAGGAGATTGGATAG      | miRNA | let-7e |
| t0092354 | 22 | 1 TGAGGTAGGAGATCGTATAGTT    | miRNA | let-7e |
| t0092596 | 21 | 1 TGAGGTAGGAGATTGAATAGT     | miRNA | let-7e |
| t0092773 | 22 | 1 TGAGGTAGGAGATTCTATAGTT    | miRNA | let-7e |
| t0092804 | 23 | 1 TGAGGTAGGAGATTGTATAGTAA   | miRNA | let-7e |
| t0092900 | 22 | 1 TGAGGTTGGAGCTTGTATAGTT    | miRNA | let-7e |
| t0093238 | 21 | 1 TGAGGTAGGAGATTGTATTGT     | miRNA | let-7e |
| t0093267 | 21 | 1 TGAGGTAGGAGATTGGATAGT     | miRNA | let-7e |
| t0093271 | 20 | 1 TGAGGAAGGAGATTGTATAG      | miRNA | let-7e |
| t0093350 | 22 | 1 TGAGGGGGGAGATTGTATAGTT    | miRNA | let-7e |
| t0093371 | 21 | 1 TGAGGTAGGAGATTGTACAGT     | miRNA | let-7e |
| t0093553 | 20 | 1 TGAGGTAGGAGATCGTATAG      | miRNA | let-7e |
| t0042320 | 22 | 1 TGAGGTAGGAGATTGTATCGTT    | miRNA | let-7e |
| t0042427 | 20 | 1 TGAGGTAGGAGATTGTAGAT      | miRNA | let-7e |
| t0043816 | 22 | 1 TGAGGTAGGAGTTTGTATAGTT    | miRNA | let-7e |
| t0047399 | 20 | 1 TGCGGTAGGAGATTGTATAG      | miRNA | let-7e |
| t0047615 | 22 | 1 TGAGGTAGGAGATTGTTTAGTT    | miRNA | let-7e |
| t0049273 | 21 | 1 TGAGGGGGGAGATTGTATAGT     | miRNA | let-7e |
| t0051913 | 21 | 1 TGAGGTAGGAGATTGTATAGG     | miRNA | let-7e |
| t0054030 | 20 | 1 TGAGGTAGGAGATTGTACAG      | miRNA | let-7e |
| t0055099 | 22 | 1 TGAGGTAGGAGATTGTATTGTT    | miRNA | let-7e |
| t0056955 | 21 | 1 TGAGGTAGGAGTTTGTATCGT     | miRNA | let-7e |
| t0058376 | 23 | 1 TGAGGTAGGAGATTGTATAGTGA   | miRNA | let-7e |
| t0059429 | 20 | 1 TGAGGTAGGAGATTGTGTAG      | miRNA | let-7e |
| t0060202 | 26 | 1 TGGGGTAGGAGTTGTATAGTTGATC | miRNA | let-7e |
| t0063143 | 22 | 1 TGAGGTAGGGGATTGTATAGTT    | miRNA | let-7e |
| t0063219 | 21 | 1 TGAGGCAGGAGATTGTATAGT     | miRNA | let-7e |
| t0065012 | 21 | 1 GAGGTAGGAGATTGTATAGTT     | miRNA | let-7e |
| t0066525 | 20 | 1 TGAGGTAGGAGATTGCATAG      | miRNA | let-7e |
| t0066911 | 20 | 1 TTAGGTAGGAGATTGTATAG      | miRNA | let-7e |
| t0068083 | 22 | 1 TTAGGTAGGAGATTGTATAGTT    | miRNA | let-7e |
| t0068624 | 22 | 1 TGAAGTAGGAGATTGTATAGTT    | miRNA | let-7e |
| t0069517 | 22 | 1 TGAGGTAGGAGATTGTATATTT    | miRNA | let-7e |
| t0069528 | 25 | 1 TGAGGTAGGAGATTGAATAGTTATC | miRNA | let-7e |
| t0070230 | 22 | 1 TGAGGTAGGAGATTGGATAGTT    | miRNA | let-7e |
| t0071028 | 22 | 1 TGAGGTAGGAAATTGTATAGTT    | miRNA | let-7e |

|          |    |                             |       |         |
|----------|----|-----------------------------|-------|---------|
| t0072197 | 22 | 1 TGAGGTAGGAGATTGTATACT     | miRNA | let-7e  |
| t0072581 | 22 | 1 TGAGGCAGGAGATTGTATAGTT    | miRNA | let-7e  |
| t0074375 | 23 | 1 TTGAGGTAGGAGATTGTATAGTT   | miRNA | let-7e  |
| t0074777 | 20 | 1 TGAGGTAGGAGATTGAATAG      | miRNA | let-7e  |
| t0076032 | 21 | 1 TGAGGTAGGAGATTGTATACT     | miRNA | let-7e  |
| t0076384 | 20 | 1 AGGTAGGAGGTTGTATAGTT      | miRNA | let-7e  |
| t0078153 | 22 | 1 TGAGGTAGGAGATTGTAGAGTT    | miRNA | let-7e  |
| t0079352 | 20 | 1 CTATACGACCTGCTGACTTT      | miRNA | let-7d* |
| t0079717 | 21 | 1 AAAGGAAGTAGGTTGCATAGT     | miRNA | let-7d  |
| t0080845 | 22 | 1 AGCGGTAGTAGGTTGCATCGTT    | miRNA | let-7d  |
| t0082307 | 22 | 1 AGAGGTAGTAGGATGCATGGTT    | miRNA | let-7d  |
| t0083335 | 19 | 1 AGAGGTACTAGGTTGCATA       | miRNA | let-7d  |
| t0083547 | 24 | 1 AGAGGTAGTAGGTTGCGTAGTTCT  | miRNA | let-7d  |
| t0084519 | 20 | 1 AGAGGTAGTAGGCTGCATAA      | miRNA | let-7d  |
| t0085523 | 20 | 1 AGAGGGAGGAGGTTGCATAG      | miRNA | let-7d  |
| t0088824 | 23 | 1 AGAGGTAGTAGGTTGCATACTTA   | miRNA | let-7d  |
| t0089621 | 21 | 1 AGAGGTAGTAGCTTGCATAGT     | miRNA | let-7d  |
| t0092510 | 22 | 1 AGAGGAAGTAGGTTGCATAGTA    | miRNA | let-7d  |
| t0092927 | 20 | 1 ATAGGTAGTGGGTTGCATAG      | miRNA | let-7d  |
| t0093232 | 19 | 1 AGAGGTAGTAGGTTGCAAA       | miRNA | let-7d  |
| t0091903 | 22 | 1 AGAGGTCGTATGTTGCATAGTT    | miRNA | let-7d  |
| t0040949 | 20 | 1 AGAGGTAGTAGGGTGCAAAG      | miRNA | let-7d  |
| t0041008 | 25 | 1 AGAGGTAGTAGGGTGCATAGTTAAA | miRNA | let-7d  |
| t0041065 | 19 | 1 AGAGGTAATAGGTTGCATA       | miRNA | let-7d  |
| t0041191 | 23 | 1 AGAGGTAGTAGGTTGCATAGCTA   | miRNA | let-7d  |
| t0042373 | 23 | 1 AGAGGTAGTAGGTTGCTTAGTTA   | miRNA | let-7d  |
| t0042406 | 23 | 1 AGAGGTAGTAGGTTTCATAGTTA   | miRNA | let-7d  |
| t0042776 | 23 | 1 AGAGGTAGTAGGTTGCATAGATG   | miRNA | let-7d  |
| t0043163 | 20 | 1 AGAGCTAGTAGGTTGCATAG      | miRNA | let-7d  |
| t0044125 | 22 | 1 AGACGTGGTAGGTTGCATAGTT    | miRNA | let-7d  |
| t0044620 | 25 | 1 AGAGGTAGTAGGGTGCATAGTTATC | miRNA | let-7d  |
| t0045941 | 25 | 1 AGAGGTAGTAGGTTGCATAGTTAAC | miRNA | let-7d  |
| t0046400 | 22 | 1 AGAGGTAGTAGGTTGCATAGGG    | miRNA | let-7d  |
| t0046512 | 20 | 1 AGAGGTAGGAGGGTGCATAG      | miRNA | let-7d  |
| t0047066 | 22 | 1 AGAGGGAGTAGGATGCATAGTT    | miRNA | let-7d  |
| t0047099 | 22 | 1 AGAGGAAGTAGGTTGCATAGAT    | miRNA | let-7d  |
| t0048072 | 19 | 1 AGAGGTAGTAGGTTGCGTA       | miRNA | let-7d  |
| t0048420 | 20 | 1 AGACGTAGTAGGTTGCATAG      | miRNA | let-7d  |
| t0048566 | 20 | 1 ACAGGTAGTAGGTTGCATAG      | miRNA | let-7d  |
| t0048710 | 23 | 1 AGAGGTAGTAGGTTGTATAGTTT   | miRNA | let-7d  |
| t0049127 | 23 | 1 AGAGGTAGTAGGTTGCATAGTTC   | miRNA | let-7d  |
| t0049221 | 21 | 1 AGAGGTAGTAGGTGGCATAGT     | miRNA | let-7d  |
| t0049587 | 18 | 1 AGAGGTAGTAGGTCGCAT        | miRNA | let-7d  |
| t0050041 | 21 | 1 AGCGGTAGTAGGTTGAATAGT     | miRNA | let-7d  |
| t0050345 | 22 | 1 AGACGTAGTAGGTTGCATAGTT    | miRNA | let-7d  |
| t0050470 | 22 | 1 AGAGGGGGTAGGTTGCATAGTT    | miRNA | let-7d  |
| t0050874 | 21 | 1 AGAGGTAGTGGGTTGTATAGT     | miRNA | let-7d  |
| t0051419 | 22 | 1 AAGAGGTATTAGGTTGCATAGT    | miRNA | let-7d  |
| t0051636 | 22 | 1 AGAGGTAGTAGGTTGCGTAGTA    | miRNA | let-7d  |
| t0052584 | 20 | 1 AGAGGTAGTAGGTAGCATAG      | miRNA | let-7d  |
| t0052611 | 23 | 1 AGAGGTGGTAGGTTGCATAGTTG   | miRNA | let-7d  |
| t0053271 | 21 | 1 TAGAGGTAGTAGGTTGCCTAG     | miRNA | let-7d  |
| t0053837 | 20 | 1 AGAGGGAGTAGGGTGCATAG      | miRNA | let-7d  |
| t0054000 | 21 | 1 TAGAGGAAGTAGGTTGCATAG     | miRNA | let-7d  |
| t0054069 | 21 | 1 AGAGGTATTAGGTTGCATAGT     | miRNA | let-7d  |
| t0055754 | 22 | 1 AGAGGTAGTCGGTTGCATAGTA    | miRNA | let-7d  |
| t0055885 | 24 | 1 AGAGGTAGTAGGCTGCATAGTTAA  | miRNA | let-7d  |
| t0056093 | 22 | 1 AGGGGTAGTAGGTTGCATAGTA    | miRNA | let-7d  |

|          |    |                             |       |        |
|----------|----|-----------------------------|-------|--------|
| t0056541 | 22 | 1 AGAGGTAGTAGGTTGCGTGGTT    | miRNA | let-7d |
| t0057045 | 22 | 1 AGAGGTAGTAGGTTGCATAGAC    | miRNA | let-7d |
| t0057506 | 22 | 1 AGCGGCAGTAGGTTGCATAGTT    | miRNA | let-7d |
| t0057610 | 18 | 1 AGATGTAGTAGGTTGCAT        | miRNA | let-7d |
| t0057937 | 20 | 1 AGAGGGAGAAGGTTGCATAG      | miRNA | let-7d |
| t0058469 | 19 | 1 AGAGGTAGTAGGGTGCATA       | miRNA | let-7d |
| t0059083 | 20 | 1 ATAGGTAGTAGGGTGCATAG      | miRNA | let-7d |
| t0059097 | 19 | 1 AGAGGTAGTAGGCTGCATA       | miRNA | let-7d |
| t0059250 | 20 | 1 AGAGGTAGTCGGTTGCATAG      | miRNA | let-7d |
| t0059327 | 21 | 1 ACAGGTAGTAGTTTGCATAGT     | miRNA | let-7d |
| t0059963 | 24 | 1 AGAGGTAGTAGGTTCCATAGTTAT  | miRNA | let-7d |
| t0060339 | 21 | 1 AGAGGTAGTAGGTTGGATAGA     | miRNA | let-7d |
| t0060344 | 19 | 1 AGAGGCAGTAGGTTGCATA       | miRNA | let-7d |
| t0061496 | 21 | 1 AGAGGGAGTAGGTTGAATAGT     | miRNA | let-7d |
| t0062010 | 21 | 1 TGGAGGTAGTAGGTTGCATAG     | miRNA | let-7d |
| t0062155 | 21 | 1 AGAGGTAGTAGGTTGCATATT     | miRNA | let-7d |
| t0062261 | 21 | 1 GAGGAAGTAGGTTGCATAGTT     | miRNA | let-7d |
| t0062742 | 23 | 1 AGAGGTAGTAGGCTGCATAGTTT   | miRNA | let-7d |
| t0062825 | 21 | 1 AGAGGGAGTAGGTTGCATAGA     | miRNA | let-7d |
| t0063716 | 22 | 1 AGAGGTAGTAGGTTGCAAAGTA    | miRNA | let-7d |
| t0064096 | 19 | 1 AGAGGTAGTAGGTTGCCTA       | miRNA | let-7d |
| t0064221 | 22 | 1 AGAGGTGGTAGGTTGCATAGGT    | miRNA | let-7d |
| t0064676 | 22 | 1 AGAGGGAGAAGGTTGCATAGTT    | miRNA | let-7d |
| t0065952 | 21 | 1 AGAGCTAGTAGGTTGCATAGT     | miRNA | let-7d |
| t0066480 | 23 | 1 AGAGGGAGTAGGTTGCATAGTTG   | miRNA | let-7d |
| t0066689 | 19 | 1 AGAGGTAGTAGGTTGCATC       | miRNA | let-7d |
| t0066774 | 24 | 1 AGAGGTAGTAGGTTGCGTAGTTAT  | miRNA | let-7d |
| t0067137 | 22 | 1 AGAAGTAGTAGGTTGCATAGTA    | miRNA | let-7d |
| t0067250 | 21 | 1 AGAGGTAGTGGGTTGCATAGA     | miRNA | let-7d |
| t0067914 | 25 | 1 AGAGGTAGTAGGATGCATAGTTATC | miRNA | let-7d |
| t0068747 | 19 | 1 AGAGGTGGTAGGTTGCATA       | miRNA | let-7d |
| t0070242 | 22 | 1 AGAGGTAGTAGGTGGCATAGTT    | miRNA | let-7d |
| t0070813 | 20 | 1 AGAGGTAGTAGTTTGCCTAG      | miRNA | let-7d |
| t0071170 | 23 | 1 AGAGGTAGTAGGGTGCATAGTTG   | miRNA | let-7d |
| t0071466 | 22 | 1 AGAGGTAGTAGGATGCATAGTA    | miRNA | let-7d |
| t0071547 | 19 | 1 AGAGGTAGTGGGTTGCATA       | miRNA | let-7d |
| t0071558 | 20 | 1 GAGGCAGTAGGTTGCATAGT      | miRNA | let-7d |
| t0072250 | 22 | 1 AGCGGTAGTCGGTTGCATAGTT    | miRNA | let-7d |
| t0072263 | 19 | 1 AGAGGTAGTAGGTTACATA       | miRNA | let-7d |
| t0073362 | 20 | 1 AGAGGTAGTAGGTTGCATAC      | miRNA | let-7d |
| t0074663 | 20 | 1 AAAGGTAGTAGGTTGCATAG      | miRNA | let-7d |
| t0075293 | 20 | 1 AGAGGTAGTAGGTTGCATAT      | miRNA | let-7d |
| t0075715 | 23 | 1 AGAGGTAGTAGGTTACATAGTTG   | miRNA | let-7d |
| t0076174 | 22 | 1 ACAGGTAGTAGGGTGCATAGTT    | miRNA | let-7d |
| t0077213 | 23 | 1 AGAGGTAGTAGGTTGCGTAGTTG   | miRNA | let-7d |
| t0077339 | 20 | 1 AGAGGGGGTAGGTTGCATAG      | miRNA | let-7d |
| t0077472 | 21 | 1 GGTAGTAGGTTGCATAGTTGA     | miRNA | let-7d |
| t0077697 | 24 | 1 AGAGGGAGTAGGTTGCATAGTTTT  | miRNA | let-7d |
| t0078008 | 21 | 1 AGAGGTAGTAGGGTGCACAGT     | miRNA | let-7d |
| t0078052 | 21 | 1 AGAGGTTGTAGGTTGCATAGT     | miRNA | let-7d |
| t0078660 | 22 | 1 AGAGGGAGTAGGTTGCATAGTA    | miRNA | let-7d |
| t0078978 | 21 | 1 AGAGGAAGTAGGTTGCATAAT     | miRNA | let-7d |
| t0081219 | 25 | 1 AGAGGCAGTAGGTTGCATAGTTATC | miRNA | let-7d |
| t0082041 | 23 | 1 AGAGGTAGTAGGTTGCATAGGTA   | miRNA | let-7d |
| t0082302 | 22 | 1 AGAGGTAGCAGGTTGCATAGTA    | miRNA | let-7d |
| t0082954 | 21 | 1 AGAGGTAGCAGGTTGTATAGT     | miRNA | let-7d |
| t0083722 | 22 | 1 AGAGGTAGGAGGGTGCATAGTT    | miRNA | let-7d |
| t0083928 | 23 | 1 AGACGTAGTAGGTTGCATAGTTG   | miRNA | let-7d |

|          |    |                              |       |         |
|----------|----|------------------------------|-------|---------|
| t0084731 | 26 | 1 AAGAGGTAGTAGGATGCATAGTAATT | miRNA | let-7d  |
| t0085199 | 23 | 1 AGAGGTAGTAGGCTGCATAGTTG    | miRNA | let-7d  |
| t0085242 | 22 | 1 AGAGGGAGGAGGTTGCATAGTT     | miRNA | let-7d  |
| t0086515 | 22 | 1 AGAGGTAGTAGGATGCATAGGT     | miRNA | let-7d  |
| t0087231 | 21 | 1 AGAGGTAGTAGGATGTATAGT      | miRNA | let-7d  |
| t0088254 | 23 | 1 AGAGGTAGTAGGTTGCGTAGTTT    | miRNA | let-7d  |
| t0088360 | 21 | 1 AGAGGAAGTAGGTTCCATAGT      | miRNA | let-7d  |
| t0089305 | 25 | 1 TGAGGTAGTAGGCTGTATGGTTATC  | miRNA | let-7c  |
| t0090046 | 22 | 1 TGAGGTAGTAGGTTGTATGGAT     | miRNA | let-7c  |
| t0090191 | 22 | 1 TGAGGTAGTTGGTTATATGGTT     | miRNA | let-7c  |
| t0090234 | 25 | 1 TGAGGTAGTAGGTTGAATGGTTATC  | miRNA | let-7c  |
| t0090566 | 22 | 1 TGAGGTAGTAGGTTGTATGGGT     | miRNA | let-7c  |
| t0090734 | 25 | 1 TGAGGTTGTAGGTTGTATGGTTATC  | miRNA | let-7c  |
| t0090811 | 21 | 1 TGAGGTAGTAGGTTGTATGGA      | miRNA | let-7c  |
| t0091290 | 25 | 1 TGAGGTAGTAGGTTCTATGGTTATC  | miRNA | let-7c  |
| t0091773 | 25 | 1 TGAGGCAGTAGGTTGTATGGTTATC  | miRNA | let-7c  |
| t0092296 | 22 | 1 TTAGGTAGTAGGTTGTATGGTT     | miRNA | let-7c  |
| t0092867 | 20 | 1 TGCGGTAGTAGGTTGTATGG       | miRNA | let-7c  |
| t0093158 | 25 | 1 TGAGGTAGTAGGTTGTACGGTTATC  | miRNA | let-7c  |
| t0093310 | 22 | 1 TGAGGTGGTTGGTTGTATGGTT     | miRNA | let-7c  |
| t0041693 | 21 | 1 TGAGGTAGTAGGTTGCATGGT      | miRNA | let-7c  |
| t0042691 | 21 | 1 TGGGGTAGTAGGTTGTATGGT      | miRNA | let-7c  |
| t0044087 | 25 | 1 TGAGGTAGTAGGTCGTATGGTTATC  | miRNA | let-7c  |
| t0045644 | 22 | 1 TGCGGTAGTAGGTTGTATGGTT     | miRNA | let-7c  |
| t0045793 | 22 | 1 TGAGGTAGTTGGTTGTATGGTT     | miRNA | let-7c  |
| t0048245 | 21 | 1 TGAGATAGTAGGTTGTATGTT      | miRNA | let-7c  |
| t0048744 | 22 | 1 TGAGGTAGTAGGTTGTATGTTT     | miRNA | let-7c  |
| t0050015 | 22 | 1 TGAGGTGGTGGGTTGTATGGTT     | miRNA | let-7c  |
| t0052347 | 19 | 1 TGAGGTAGTAGGATGTATG        | miRNA | let-7c  |
| t0052792 | 25 | 1 TGAGGTAGGAGGTTGTATGGTTATC  | miRNA | let-7c  |
| t0052820 | 22 | 1 TGAGGTGGTAGGTTGTATGGTT     | miRNA | let-7c  |
| t0053360 | 22 | 1 TGAGGTAATAGGTTGTATGGTT     | miRNA | let-7c  |
| t0054455 | 22 | 1 TGAGGTAGTATGTTGTATGGTT     | miRNA | let-7c  |
| t0054587 | 20 | 1 TGAGGTAGTCGGTTGTATGG       | miRNA | let-7c  |
| t0059103 | 25 | 1 TTAGGTAGTAGGTTGTATGGTTATC  | miRNA | let-7c  |
| t0059761 | 20 | 1 TGAGGTAGTAGGGTGTATGG       | miRNA | let-7c  |
| t0061262 | 21 | 1 TGAGGTAGTAGGTTGTAAGGT      | miRNA | let-7c  |
| t0061924 | 24 | 1 GAGGTAGTAGGTTGTATGGTTATC   | miRNA | let-7c  |
| t0063120 | 25 | 1 TGACGTAGTAGGTTGTATGGTTATC  | miRNA | let-7c  |
| t0063874 | 25 | 1 TGAGGTAGTCGGTTGTATGGTTATC  | miRNA | let-7c  |
| t0066862 | 22 | 1 TGAGGCAGTAGGTTGTATGGTT     | miRNA | let-7c  |
| t0067238 | 20 | 1 TGAGGTAGTAGCTTGTATGT       | miRNA | let-7c  |
| t0067407 | 20 | 1 TCAGGTAGTAGGTTGTATGG       | miRNA | let-7c  |
| t0069680 | 21 | 1 TGAGGTAGTAGTTTGTATGGT      | miRNA | let-7c  |
| t0070383 | 20 | 1 TGAGGTAGTAGGTTATATGG       | miRNA | let-7c  |
| t0071441 | 19 | 1 CTATACAACCTGCTGCCTT        | miRNA | let-7b* |
| t0073950 | 19 | 1 CTATGCAACCTACTGCCTT        | miRNA | let-7b* |
| t0076994 | 20 | 1 CTATACAACATACTGCCTTC       | miRNA | let-7b* |
| t0078376 | 21 | 1 CTATACAACATACTGCCTTCC      | miRNA | let-7b* |
| t0078864 | 21 | 1 TGGGGTAGTGGGTTGTGTGGT      | miRNA | let-7b  |
| t0078892 | 23 | 1 TGAGGTAGTAGATTGTGTGGTAT    | miRNA | let-7b  |
| t0080296 | 21 | 1 TGAGGTATTAGGTTGTGCGGT      | miRNA | let-7b  |
| t0080789 | 26 | 1 TGAGGTAGTGGGTTGTGTGGTAAGAA | miRNA | let-7b  |
| t0081075 | 21 | 1 TGAGGTAGTAGGCTGAGTGGT      | miRNA | let-7b  |
| t0083981 | 21 | 1 TGAGGCAGTAGGTTGTGTGGA      | miRNA | let-7b  |
| t0084457 | 24 | 1 TGAGGAAGTAGGTAGTGTGGTTAA   | miRNA | let-7b  |
| t0090918 | 21 | 1 TGAGGTAGTAGGTCGTGTAGT      | miRNA | let-7b  |
| t0092104 | 22 | 1 TGAGGTGGTCGGTTGTGTGGTT     | miRNA | let-7b  |



|          |    |                                |       |        |
|----------|----|--------------------------------|-------|--------|
| t0046214 | 24 | 1 TAAGGTAGTAGGTTGTGTGGTTAT     | miRNA | let-7b |
| t0046268 | 26 | 1 TGAGGTCGTAGGTTGTGTGGTTAGAT   | miRNA | let-7b |
| t0046342 | 21 | 1 TGAGGAAGTAGGTTGTGTAGT        | miRNA | let-7b |
| t0046394 | 24 | 1 TGAGGTAGTAGGTTGTTTGGTTAT     | miRNA | let-7b |
| t0046482 | 24 | 1 TGAGGTAGTAGGTTGTGCGGTTAT     | miRNA | let-7b |
| t0046533 | 25 | 1 TGAGGTAGCAGGTTGTGTGGTTATC    | miRNA | let-7b |
| t0046633 | 24 | 1 TGAGCTAGTAGGTTGTGTGGTTAA     | miRNA | let-7b |
| t0046763 | 19 | 1 TGAGGTAGTAGGTTGCGTG          | miRNA | let-7b |
| t0046777 | 24 | 1 TGAGGTAGTAGGTTGTATGGTTTC     | miRNA | let-7b |
| t0046785 | 21 | 1 TGAGGTACCAGGTTGTGTGGT        | miRNA | let-7b |
| t0046887 | 22 | 1 TGAGGTAGTAGTTTGTCTGGTT       | miRNA | let-7b |
| t0046926 | 24 | 1 TGAGGTAGTAGGTTGTGTGGTTCT     | miRNA | let-7b |
| t0047031 | 21 | 1 TGAGGTAGTAGGGTGTGTGGA        | miRNA | let-7b |
| t0047265 | 24 | 1 TGAGGTAGTAGGATGTGTGGTTAA     | miRNA | let-7b |
| t0047397 | 21 | 1 TGAGGTAGTAGGTTGTGGGGG        | miRNA | let-7b |
| t0047478 | 22 | 1 TGAGGTAGCAGGTTGTGTGGGT       | miRNA | let-7b |
| t0047558 | 21 | 1 TGAGGTAGTGGGTTGTTTGGT        | miRNA | let-7b |
| t0047694 | 25 | 1 TGAGGTAGTAGGGTGTGTGGTTAGA    | miRNA | let-7b |
| t0047809 | 24 | 1 TGAGGTAAGTAGGTTGTGTGGTTAT    | miRNA | let-7b |
| t0047811 | 19 | 1 TGAGGTAGTAGGTTTTGTG          | miRNA | let-7b |
| t0047831 | 42 | 1 TGAGGTGGTAGGTTGTGTGGTTTTGTTG | miRNA | let-7b |
| t0048018 | 22 | 1 TAAGGTAGTAGGTTGTGCGGTT       | miRNA | let-7b |
| t0048129 | 20 | 1 TGAGGTAGTAGGTAGTGTGG         | miRNA | let-7b |
| t0048474 | 21 | 1 TGCGGCAGTAGGTTGTGTGGT        | miRNA | let-7b |
| t0048607 | 22 | 1 TAAGGTAGTAGGTTGTGAGGTT       | miRNA | let-7b |
| t0048642 | 24 | 1 TGAGGTAGTAGGTTGTGTGATTGA     | miRNA | let-7b |
| t0048656 | 21 | 1 TGAGGTAAGTAGGTTGTGGGGT       | miRNA | let-7b |
| t0049057 | 21 | 1 TGAGATAGTAGGGTGTGTGGT        | miRNA | let-7b |
| t0049084 | 22 | 1 TGTGGTAGTCCGTTGTGTGGTT       | miRNA | let-7b |
| t0049238 | 21 | 1 TGACGTAGTGGGTTGTGTGGT        | miRNA | let-7b |
| t0049556 | 21 | 1 TGAGCTAGAAGGTTGTGTGGT        | miRNA | let-7b |
| t0049575 | 23 | 1 TAAGGTAGTAGGTTGTGTGGTAT      | miRNA | let-7b |
| t0049609 | 21 | 1 TGGGGTAGTAGATTGTGTGGT        | miRNA | let-7b |
| t0049666 | 25 | 1 TGAGGTAGTAGGTTGTGTGGTTGTC    | miRNA | let-7b |
| t0049679 | 23 | 1 TGAGGTAGTGGGTTGTGTGGTTG      | miRNA | let-7b |
| t0049758 | 22 | 1 TGAGGTAGTAGGTTATGTAGTT       | miRNA | let-7b |
| t0049816 | 21 | 1 TGAGGCAGTAGGTTGTGTGTT        | miRNA | let-7b |
| t0049886 | 25 | 1 TGAGGTAGTAGGTTGTGTGGTTGGA    | miRNA | let-7b |
| t0050066 | 24 | 1 TGAGGTAGTAGGTTGTGTGGCTAA     | miRNA | let-7b |
| t0050458 | 24 | 1 TGAGGTAGTAGATTGTGTGGTTAA     | miRNA | let-7b |
| t0050667 | 24 | 1 TGAGGAAGTAGGTTGTGTGGTTAG     | miRNA | let-7b |
| t0050683 | 22 | 1 TGAGGTAGTAGGTTGTTTGGTA       | miRNA | let-7b |
| t0050703 | 22 | 1 TAAGGAAGTAGGTTGTGTGGTT       | miRNA | let-7b |
| t0050963 | 22 | 1 TGAGGTAGTTGGTTGTGTGGGT       | miRNA | let-7b |
| t0051136 | 25 | 1 TGAGGTAGTAGGTTGTATGGTTGTC    | miRNA | let-7b |
| t0051149 | 24 | 1 TGAGGTAGTAGGTTGCGTGGTTAG     | miRNA | let-7b |
| t0051325 | 21 | 1 TGAGGTAGTAGGTTGTGCGGA        | miRNA | let-7b |
| t0051887 | 19 | 1 TGAGGTAGTACGTTGTGTG          | miRNA | let-7b |
| t0051970 | 23 | 1 TGAGGTAGTAGGTTGCGTGGTAG      | miRNA | let-7b |
| t0052010 | 22 | 1 TGTGGTAGCAGGTTGTGTGGTT       | miRNA | let-7b |
| t0052063 | 23 | 1 TGAGGTAGTCCGTTGTGTGGTAT      | miRNA | let-7b |
| t0052071 | 21 | 1 TGAGGTAGTAGGTTGCGTGGA        | miRNA | let-7b |
| t0052165 | 42 | 1 TGAGGTAGTAGGTTGTGTGGTTTGTGTG | miRNA | let-7b |
| t0052253 | 22 | 1 ATGAGGTAGTAGGTTGTGTGGT       | miRNA | let-7b |
| t0052595 | 42 | 1 TGAGGTAGTAGGTTGTGTGGTTTGTG   | miRNA | let-7b |
| t0052833 | 22 | 1 TGTGGTAGTTGGTTGTGTGGTT       | miRNA | let-7b |
| t0052880 | 23 | 1 CGAGGTAGTAGGTTGTGTGGATC      | miRNA | let-7b |
| t0052891 | 21 | 1 TGAGGCAGTAGGTAGTGTGGT        | miRNA | let-7b |

|          |    |                                  |       |        |
|----------|----|----------------------------------|-------|--------|
| t0052943 | 22 | 1 TGGGGTAGTAGGTTGTGTGTTT         | miRNA | let-7b |
| t0052958 | 24 | 1 TGAGGTAGTAGGTTGTGTAGTTAG       | miRNA | let-7b |
| t0053129 | 19 | 1 TGAGGTAGTTGGTTGTGTG            | miRNA | let-7b |
| t0053234 | 23 | 1 TGAGGTAGTAGGTTATGTGGTTG        | miRNA | let-7b |
| t0053371 | 22 | 1 TGAGGTAGTAGGGTGTGCGGTT         | miRNA | let-7b |
| t0053435 | 21 | 1 TGAGGCTGTAGGTTGTGTGGT          | miRNA | let-7b |
| t0053598 | 19 | 1 GAGGTAGTAGGTTGTGTGG            | miRNA | let-7b |
| t0053654 | 23 | 1 TGAGGTAGTCGGTTGTGTGGTTG        | miRNA | let-7b |
| t0053775 | 19 | 1 TGAGGTAGTAGGTTGCGTT            | miRNA | let-7b |
| t0053778 | 20 | 1 TGAGGTAGTAGGGTGTGTAG           | miRNA | let-7b |
| t0053805 | 24 | 1 TGAGGTAGTAGGTTGTGTGGATAA       | miRNA | let-7b |
| t0053846 | 24 | 1 TGAGGTAGTAGGTTGTGTGGTAGG       | miRNA | let-7b |
| t0053855 | 23 | 1 TGGGGTAGTAGGTTGTGTGGTTG        | miRNA | let-7b |
| t0054498 | 22 | 1 TGGGGAAGTAGGTTGTGTGGTT         | miRNA | let-7b |
| t0054582 | 22 | 1 TGAGTTAGCAGGTTGTGTGGTT         | miRNA | let-7b |
| t0054690 | 23 | 1 TGAGGTAGTAGGTTGTGTGGCTC        | miRNA | let-7b |
| t0054744 | 22 | 1 TGAGGTAAGTAGGTTGTGTGGTA        | miRNA | let-7b |
| t0054991 | 18 | 1 TGTAGTAGGTTGCGTGGT             | miRNA | let-7b |
| t0055004 | 24 | 1 CTGAGGAAGTAGGTTGTGTGGTTA       | miRNA | let-7b |
| t0055232 | 21 | 1 TGAGGTAGTAGGCCGTGTGGT          | miRNA | let-7b |
| t0055233 | 22 | 1 TGAGGTAGTAGCTTTTGTGGTT         | miRNA | let-7b |
| t0055305 | 21 | 1 TGAGGTAGTAGGGTGTGTAGT          | miRNA | let-7b |
| t0055330 | 22 | 1 TGAGGTAGTAGGTTGTGCGGTG         | miRNA | let-7b |
| t0055362 | 24 | 1 TGAGGTAGTAGGTTGTGAGGTA         | miRNA | let-7b |
| t0055437 | 21 | 1 TTAGGTAGTAGGGTGTGTGGT          | miRNA | let-7b |
| t0055477 | 21 | 1 TGAGGTAGTAGGTCGTGTGTT          | miRNA | let-7b |
| t0055516 | 22 | 1 TGAGGAAGTAGGTTGTGTGGGT         | miRNA | let-7b |
| t0055522 | 26 | 1 TGAGGTAGTAGGTTGTGCGGTTTATC     | miRNA | let-7b |
| t0055581 | 22 | 1 TGAGGTAGTAGGTTGTCTCGTT         | miRNA | let-7b |
| t0055721 | 23 | 1 TGAGGTAGTAGGTTGTGTGATTG        | miRNA | let-7b |
| t0055802 | 23 | 1 TGAGGTTGTAGGTTGTGTGGTTT        | miRNA | let-7b |
| t0056184 | 22 | 1 TGAGGAAGTAGTTTGTGTGGTT         | miRNA | let-7b |
| t0056397 | 21 | 1 TGGGGTAGTAGGTTGTCTGGT          | miRNA | let-7b |
| t0056539 | 22 | 1 TGAGGTAGTAGGGTATGTGGTT         | miRNA | let-7b |
| t0056703 | 22 | 1 TGAGGTAGTAGATTGTGGGGTT         | miRNA | let-7b |
| t0056765 | 21 | 1 TGAGGTAGTAGGTTGTGGAGT          | miRNA | let-7b |
| t0056969 | 24 | 1 TGAGGTAGTAGGTTGTATGTTGA        | miRNA | let-7b |
| t0057051 | 24 | 1 TGAGGTAGTGGGTTGTGTGGTTAG       | miRNA | let-7b |
| t0057159 | 23 | 1 TGAGGTAGTAGGTTGTGAGGTAA        | miRNA | let-7b |
| t0057502 | 24 | 1 TGAGGAAGTAGGTTGTGTGGTTGA       | miRNA | let-7b |
| t0057739 | 22 | 1 TGAGGTCGTAGGTTGTGTGGTA         | miRNA | let-7b |
| t0057781 | 19 | 1 TGAGGTAGTGGGTTGTGTA            | miRNA | let-7b |
| t0057966 | 23 | 1 CGAGGTAGTAGGTTGTGTGGTAA        | miRNA | let-7b |
| t0058527 | 21 | 1 CGAGGTAGTAGGTTGTGTTGT          | miRNA | let-7b |
| t0058563 | 22 | 1 TGAGATAGTAGGTAGTGTGGTT         | miRNA | let-7b |
| t0058741 | 22 | 1 TGGGGTAGTAGGTTGTGTAGTT         | miRNA | let-7b |
| t0058789 | 22 | 1 TGAGGCAGTAGGTTGTGTGATT         | miRNA | let-7b |
| t0058807 | 24 | 1 TGGGGTAGTAGGTTGTGGGGTTAT       | miRNA | let-7b |
| t0058882 | 23 | 1 TGAGGTAGTAGGTTCTGTGGTAA        | miRNA | let-7b |
| t0058946 | 21 | 1 TGAGGTAGTAGCTTGTGTGGC          | miRNA | let-7b |
| t0058978 | 21 | 1 TGAGGTCGTAGGTTGTGGGGT          | miRNA | let-7b |
| t0058995 | 22 | 1 TGAGGTATTAGGGTGTGTGGTT         | miRNA | let-7b |
| t0059038 | 22 | 1 TGAGGTAGTAGGTTGTGGGGTG         | miRNA | let-7b |
| t0059069 | 22 | 1 TGAGGTAGTAGCTTGTGTGGGT         | miRNA | let-7b |
| t0059081 | 41 | 1 TGAGGTAGTTGGTTGTGTAGTTTGGTTTGC | miRNA | let-7b |
| t0059331 | 21 | 1 TGACGTAGTAGGTTGTGTAGT          | miRNA | let-7b |
| t0059347 | 24 | 1 TGAGGTAATAGGTTGTGTGGTTAT       | miRNA | let-7b |
| t0059540 | 22 | 1 TGAGGTAAGTAGGTTGGGTGGTT        | miRNA | let-7b |

|          |    |                                 |       |        |
|----------|----|---------------------------------|-------|--------|
| t0059631 | 21 | 1 TGAGCTAGTAGTTTGTGTGGT         | miRNA | let-7b |
| t0059745 | 23 | 1 TGAGGTAGTAAGTTGTGTGGTTT       | miRNA | let-7b |
| t0059818 | 23 | 1 TGTGGTAGTAGGTTGTGTGGTTA       | miRNA | let-7b |
| t0059895 | 23 | 1 TGAGCTAGTAGGTTGTGTGGTTG       | miRNA | let-7b |
| t0060144 | 23 | 1 TGAGGTAGTAGGTCGTGTGGTGA       | miRNA | let-7b |
| t0060207 | 23 | 1 TGAGATATTAGGTTGTGTGGTTA       | miRNA | let-7b |
| t0060242 | 23 | 1 TGAGGTAGTAGGTTGTGTGGTGC       | miRNA | let-7b |
| t0060273 | 22 | 1 TGAGGTAGTAGTTTGTGTGATT        | miRNA | let-7b |
| t0060350 | 23 | 1 TGAGGTAGTAGTTTGTGTGGTAT       | miRNA | let-7b |
| t0060414 | 21 | 1 TGAGGTGGTAGTTTGTGTGGT         | miRNA | let-7b |
| t0060457 | 21 | 1 TGAGGCAGTAGGTTGTGTAGT         | miRNA | let-7b |
| t0060494 | 44 | 1 TGAGGTAGTGGGTTGTGTGGTTTGGTTTG | miRNA | let-7b |
| t0060500 | 20 | 1 TGAGGTAGTAGGCTGTGGGG          | miRNA | let-7b |
| t0060631 | 24 | 1 TGAGGTAGGAGTTGTGTGGTATC       | miRNA | let-7b |
| t0060636 | 21 | 1 TGAGGTAGTATGTTGTGTAGT         | miRNA | let-7b |
| t0060973 | 22 | 1 TGAGGTACTAGGTTGCGTGGTT        | miRNA | let-7b |
| t0060982 | 21 | 1 TCAGGTAGTATGTTGTGTGGT         | miRNA | let-7b |
| t0061140 | 24 | 1 TGTGGTAGTAGGTTGTGTGGTTAT      | miRNA | let-7b |
| t0061234 | 23 | 1 TGAGGAAGTAGGTTGTGTGGTAG       | miRNA | let-7b |
| t0061303 | 25 | 1 TGAAGTAGTAGGTTGTGTGGTAGTC     | miRNA | let-7b |
| t0061426 | 22 | 1 TGAGGTAGTAGGGGTGTGGTT         | miRNA | let-7b |
| t0061628 | 23 | 1 TGAGGTAGTAGGTTGTGTGGGAA       | miRNA | let-7b |
| t0061633 | 25 | 1 TGAGGTAGTAGGTTGTGTGGTCATC     | miRNA | let-7b |
| t0061702 | 24 | 1 TGAGGTAGTAGGTTGTGTGGCTAG      | miRNA | let-7b |
| t0061795 | 22 | 1 AGAGGTGGTAGGTTGTGTGGTT        | miRNA | let-7b |
| t0062036 | 18 | 1 GGAGGTAGTAGGTTGTGT            | miRNA | let-7b |
| t0062047 | 22 | 1 TGAGGTCGTGGGTTGTGTGGTT        | miRNA | let-7b |
| t0062108 | 21 | 1 TGAGGTAGTAAGTTGTGTGGA         | miRNA | let-7b |
| t0062208 | 24 | 1 TGAGGTAGTAGGTTGTGTGGTTCG      | miRNA | let-7b |
| t0062212 | 21 | 1 TGATCTAGTAGGTTGTGTGGT         | miRNA | let-7b |
| t0062405 | 25 | 1 TGAGGTAGTAGGTTGTGTGGTTAGG     | miRNA | let-7b |
| t0062541 | 23 | 1 TGAGCTAGTAGGTTGTGTGGTAT       | miRNA | let-7b |
| t0062641 | 25 | 1 TGAGGTAGTAGGTTGTGTGGATATC     | miRNA | let-7b |
| t0062812 | 22 | 1 TGAGGTAGTGGGTTATGTGGTT        | miRNA | let-7b |
| t0062856 | 18 | 1 TGAGGTAGTAGGTTGTCT            | miRNA | let-7b |
| t0063029 | 21 | 1 TGCGGTAGTAGGTTGTGGGGT         | miRNA | let-7b |
| t0063303 | 21 | 1 TGAGGTTGTAGGTTGGGTGGT         | miRNA | let-7b |
| t0063326 | 24 | 1 TGAGGTAGTAGGTAGTGTGGTTAA      | miRNA | let-7b |
| t0063461 | 22 | 1 TGAGGTAGTAGGTGGTGTGGTC        | miRNA | let-7b |
| t0063533 | 22 | 1 TGAGCTAGTAGGGTGTGTGGTT        | miRNA | let-7b |
| t0063728 | 23 | 1 TGTGGTAGTAGGTTGTGTGGTTT       | miRNA | let-7b |
| t0063888 | 24 | 1 TGAGGTACTAGGTTGTGTGGTTAA      | miRNA | let-7b |
| t0064095 | 22 | 1 TGAGGTAGTAGGCCGTGTGGTT        | miRNA | let-7b |
| t0064210 | 23 | 1 TGAGGTAATAGGTTGTGTGGTAA       | miRNA | let-7b |
| t0064289 | 22 | 1 TGAGGTATTAGGTTGTGCGGTT        | miRNA | let-7b |
| t0064351 | 22 | 1 TGGGGTAGTAGGGTGTGTGGTT        | miRNA | let-7b |
| t0064352 | 23 | 1 TGAGGTAGTAGGGTGTGCGGTTT       | miRNA | let-7b |
| t0064509 | 21 | 1 TGAGGTAGTAGGGTGTCTGGT         | miRNA | let-7b |
| t0064543 | 22 | 1 TGAGTTAGTAGGTTGTGCGGTT        | miRNA | let-7b |
| t0064662 | 24 | 1 GGAGGTAGTAGGTTGTGTGGTTAT      | miRNA | let-7b |
| t0065109 | 24 | 1 TGACGTAGTAGGTTGTGTGGTTAA      | miRNA | let-7b |
| t0065206 | 21 | 1 TGAGGTAGTAGGTTGCTTGGT         | miRNA | let-7b |
| t0065214 | 25 | 1 TGCGGTAGTAGGTTGTGTGGTGAGT     | miRNA | let-7b |
| t0065288 | 23 | 1 TGAGGTAGCAGGTTGTGTGGTAA       | miRNA | let-7b |
| t0065609 | 25 | 1 TGAGGTAGTAGGTTGTGCGGTTATC     | miRNA | let-7b |
| t0065702 | 25 | 1 TGAGGTAGTAGGTTGTGGGGTTATC     | miRNA | let-7b |
| t0065751 | 20 | 1 TGGGTAGTAGGTTGTGTGGT          | miRNA | let-7b |
| t0066011 | 22 | 1 TGAGGTAGTAGGTTGTGGGGGT        | miRNA | let-7b |



|          |    |                                  |       |        |
|----------|----|----------------------------------|-------|--------|
| t0066085 | 24 | 1 GTTGAGGTAGTAGGATGTGTGGTT       | miRNA | let-7b |
| t0066117 | 22 | 1 TGGGGCAGTAGGTTGTGTGGTT         | miRNA | let-7b |
| t0066128 | 23 | 1 TGAGGTAGTAGGTTATGTGGTAT        | miRNA | let-7b |
| t0066518 | 25 | 1 TGAGGTAGTAGGCTGTGTGGTTAGA      | miRNA | let-7b |
| t0066646 | 23 | 1 TGAGGTAGTAGGTTGTGTGGAGC        | miRNA | let-7b |
| t0066746 | 20 | 1 TGGGGTAGTAGGTTGTGTAG           | miRNA | let-7b |
| t0066936 | 22 | 1 CGAGGTAGTAGGTTGTGTAGTT         | miRNA | let-7b |
| t0067185 | 26 | 1 TGAGGTAGTAGGTTGTATGGGTAATC     | miRNA | let-7b |
| t0067507 | 24 | 1 TGAGGTAGTAGGATGTGTGGTATC       | miRNA | let-7b |
| t0067536 | 23 | 1 TGAGGTAGTAAGTTGTGTGGTAA        | miRNA | let-7b |
| t0067577 | 23 | 1 CGAGGTAGTAGGTTGTGTGGTAG        | miRNA | let-7b |
| t0067833 | 24 | 1 TGAGGTAGTAGGTTGTGTGGGAAA       | miRNA | let-7b |
| t0068108 | 22 | 1 TGCGGTAGTAGGTTGTGGGGTT         | miRNA | let-7b |
| t0068178 | 21 | 1 TGAGGCAGTTGGTTGTGTGGT          | miRNA | let-7b |
| t0068185 | 22 | 1 TGAGATAGTAGGGTGTGTGGTT         | miRNA | let-7b |
| t0068371 | 22 | 1 TAAGGTAGTAGGGTGTGTGGTT         | miRNA | let-7b |
| t0068416 | 21 | 1 TGAGGTAGTGGGTTGTGTCGT          | miRNA | let-7b |
| t0068431 | 21 | 1 TGAGGTGGTAGGTTGTGGGGT          | miRNA | let-7b |
| t0068449 | 23 | 1 TGAGGTGGTAGGTTGTGTGGTAT        | miRNA | let-7b |
| t0068637 | 25 | 1 TGAGGTAGTAGGTTGTGCGGTTGAT      | miRNA | let-7b |
| t0068903 | 21 | 1 TGAGGTAGCAGGTTGTGTGGA          | miRNA | let-7b |
| t0069083 | 24 | 1 TGAGGTAGGAGGTTGTGTGGTAGA       | miRNA | let-7b |
| t0069120 | 24 | 1 TGAGGTAGTAGGTTGTGGGGTATC       | miRNA | let-7b |
| t0069271 | 21 | 1 TGGGGTAGTAGGTTGTGTGTT          | miRNA | let-7b |
| t0069327 | 21 | 1 TGAGGTACTAGGTTGTGTGTT          | miRNA | let-7b |
| t0069399 | 24 | 1 TGAGGTTGTAGGTTGTGTGGTTAA       | miRNA | let-7b |
| t0069486 | 21 | 1 TAAGGTAGTAGGTTGGGTGGT          | miRNA | let-7b |
| t0069557 | 21 | 1 TGAGGTATCAGGTTGTGTGGT          | miRNA | let-7b |
| t0069655 | 24 | 1 TGAGGTAGTAGGGTGTGTGGTTAT       | miRNA | let-7b |
| t0069760 | 23 | 1 TGAGGTAGTTGGTTGTGTGGTAT        | miRNA | let-7b |
| t0069804 | 19 | 1 TGAAGTAGTAGGTTGTGTG            | miRNA | let-7b |
| t0069855 | 23 | 1 TGCGGTAGTAGGTTGTGTGGTAA        | miRNA | let-7b |
| t0070040 | 24 | 1 TGCGGTAGTAGGTTGTGTGGTTAG       | miRNA | let-7b |
| t0070106 | 24 | 1 TGAGATAGTAGGTTGTGTGGTTAT       | miRNA | let-7b |
| t0070141 | 22 | 1 TGAGGCAGTAGGATGTGTGGTT         | miRNA | let-7b |
| t0070162 | 21 | 1 TGAGGTGGTAGGTTGTGTGTT          | miRNA | let-7b |
| t0070249 | 22 | 1 TGAGGAAGAAGGTTGTGTGGTT         | miRNA | let-7b |
| t0070370 | 21 | 1 TGAGGAAGTAGGTTGGGTGGT          | miRNA | let-7b |
| t0070419 | 21 | 1 TGAGGTGGTGGGTTGTGTGGT          | miRNA | let-7b |
| t0070443 | 24 | 1 TGAGGTAGTAGGTTATGTGGTTGA       | miRNA | let-7b |
| t0070596 | 21 | 1 TGGGGTGGTAGGTTGTGTGGT          | miRNA | let-7b |
| t0070784 | 42 | 1 TGAGGTAGTTGGTTGTGTGGTTTGGTTTGC | miRNA | let-7b |
| t0070795 | 21 | 1 TGAGGCATTAGGTTGTGTGGT          | miRNA | let-7b |
| t0070910 | 21 | 1 TGAGGTAGTAGGATGTGTGGA          | miRNA | let-7b |
| t0070950 | 22 | 1 TGAGGAAGTAGGTTGTCTGGTT         | miRNA | let-7b |
| t0070974 | 22 | 1 TGAGGTAGTCGGTTGTGGGGTT         | miRNA | let-7b |
| t0071169 | 22 | 1 AAAGGTAGTAGGTTGTGTGGTT         | miRNA | let-7b |
| t0071598 | 22 | 1 TAAGGTAGTAGGTTGTGGGGTT         | miRNA | let-7b |
| t0071744 | 20 | 1 TGAGATAGTAGGTTGTGTGA           | miRNA | let-7b |
| t0071896 | 21 | 1 TGAGGTAGTGAGTTGTGTGGT          | miRNA | let-7b |
| t0071902 | 23 | 1 TGAGGTGGTAGGTTGTGTGGTAA        | miRNA | let-7b |
| t0071954 | 21 | 1 GAGGTAGTAGGTTGCGTGGTT          | miRNA | let-7b |
| t0072103 | 21 | 1 TGAGTTAATAGGTTGTGTGGT          | miRNA | let-7b |
| t0072139 | 22 | 1 TGAGGTAGTAGGTCGTGGGGTT         | miRNA | let-7b |
| t0072160 | 23 | 1 TGAGGTAGTAGGTTGTCTGGTTT        | miRNA | let-7b |
| t0072214 | 22 | 1 TGCGTTAGTAGGTTGTGTGGTT         | miRNA | let-7b |
| t0072312 | 22 | 1 TGAGGTAGTAGGTTGTGGGGCT         | miRNA | let-7b |
| t0072688 | 21 | 1 TGAGGTAGCAGGTTGTGTTGT          | miRNA | let-7b |

|          |    |                                  |       |        |
|----------|----|----------------------------------|-------|--------|
| t0072756 | 23 | 1 TGAGGTAGAAGGTTGTGTGGTTT        | miRNA | let-7b |
| t0072832 | 19 | 1 AGAGGTAGTAGGTTGTGTG            | miRNA | let-7b |
| t0072861 | 21 | 1 CCAGGTAGTAGGTTGTGTGGT          | miRNA | let-7b |
| t0072882 | 20 | 1 AGAGGTAGTAGGTTGTGTGG           | miRNA | let-7b |
| t0072896 | 20 | 1 GAGGAAGTAGGTTGTGTGGT           | miRNA | let-7b |
| t0073364 | 22 | 1 TGAGGTAGTAGGTTGTGGGTTT         | miRNA | let-7b |
| t0073370 | 24 | 1 TGAGGTAGTAGGTTGGGTGGTTGA       | miRNA | let-7b |
| t0073448 | 21 | 1 GAGGTAGGAGGTTGTGTGGTT          | miRNA | let-7b |
| t0073553 | 21 | 1 TAAGGTAGTAGGTTGTGCGGT          | miRNA | let-7b |
| t0073581 | 24 | 1 TGAGGTAGTAGGTTATGTGGTTAT       | miRNA | let-7b |
| t0073591 | 24 | 1 TGAGGTAGCAGGTTGTGTGGTTTT       | miRNA | let-7b |
| t0073709 | 24 | 1 TGAGGTAGTAGGGTGTGTGGTTAA       | miRNA | let-7b |
| t0073764 | 27 | 1 TGAGGTAGTAGGTTGTGTGGGAATATC    | miRNA | let-7b |
| t0073820 | 24 | 1 TGAGGTGGTAGGTTGTGTGGTTAG       | miRNA | let-7b |
| t0073911 | 22 | 1 TGTGGTAGTAGGTTGTTTGGTT         | miRNA | let-7b |
| t0073929 | 22 | 1 TGAGGTAGTAGGTCGTGTAGTT         | miRNA | let-7b |
| t0073936 | 22 | 1 TGAGGTAGTAGGTTGTGGGGAT         | miRNA | let-7b |
| t0074122 | 24 | 1 TGAGGTAGTAGGCTGTGTGGTTAG       | miRNA | let-7b |
| t0074130 | 23 | 1 TGAGGTAGTAGGTTGTGAGGTTG        | miRNA | let-7b |
| t0074212 | 27 | 1 TGAGGTAGTAGGTTGTGTGGTTATATA    | miRNA | let-7b |
| t0074219 | 22 | 1 TGAGGTGGTGGGTTGTGTGGTT         | miRNA | let-7b |
| t0074269 | 23 | 1 TGAGGTAGTATGTTGTGTGGTTT        | miRNA | let-7b |
| t0074288 | 21 | 1 TGAGGTAGTAGGTTCTGTGGA          | miRNA | let-7b |
| t0074430 | 23 | 1 TGAGGTATTAGGTTGTGTGGTTA        | miRNA | let-7b |
| t0074535 | 21 | 1 TGAGGTAGTAAGTTGTGGGGT          | miRNA | let-7b |
| t0074554 | 27 | 1 TGAGGTAGTAGGTTGTGTGGTTGTATC    | miRNA | let-7b |
| t0074597 | 20 | 1 TGAGGTAGTAGGCCGTGTGG           | miRNA | let-7b |
| t0074634 | 21 | 1 TTAGGTAGTAGTTTGTGTGGT          | miRNA | let-7b |
| t0074824 | 21 | 1 TGAGGTAGTAGGTTGTGCGTT          | miRNA | let-7b |
| t0074856 | 22 | 1 TGAGGTAGAAGGTTGTGGGGTT         | miRNA | let-7b |
| t0074872 | 23 | 1 TGAGGTAATAGGTTGTGTGGTTG        | miRNA | let-7b |
| t0075458 | 25 | 1 TGAGGCAGTAGGTTGTGTGGTTATC      | miRNA | let-7b |
| t0075647 | 21 | 1 TGAGGTAGTAGGGGTGTGGT           | miRNA | let-7b |
| t0075819 | 22 | 1 TAAGGTAGGAGGTTGTGTGGTT         | miRNA | let-7b |
| t0075870 | 21 | 1 TGATGTAGTAGGCTGTGTGGT          | miRNA | let-7b |
| t0075912 | 22 | 1 TGAGGAAGTAGGTTGTGTGTTT         | miRNA | let-7b |
| t0075920 | 22 | 1 TGAGGTGGTAGGTTGTGCGGTT         | miRNA | let-7b |
| t0076113 | 23 | 1 TGAGGTAGTAGGTTGTGCGGTAT        | miRNA | let-7b |
| t0076395 | 21 | 1 TGAGCTAGTAGGTTGTGGGGT          | miRNA | let-7b |
| t0076427 | 23 | 1 TGAGGTAGTAGGTTCTGTGGTTA        | miRNA | let-7b |
| t0076488 | 21 | 1 CGAGGTAGTAGGTTGTGTAGT          | miRNA | let-7b |
| t0076535 | 21 | 1 TGAGGTAGTAGGTTGTGTGTA          | miRNA | let-7b |
| t0076546 | 20 | 1 TTAGGTAGTAGGTTGTGTGG           | miRNA | let-7b |
| t0076656 | 22 | 1 TGAGGTAGTAGGGTGGGTGGTT         | miRNA | let-7b |
| t0076687 | 42 | 1 TGAGGTGGTTGGTTGTGTGGTTTTGGTTTG | miRNA | let-7b |
| t0076740 | 25 | 1 TGAGGTAGTAGGTTGTGGGGTAGTC      | miRNA | let-7b |
| t0076925 | 26 | 1 TGAGGTAGTAGGTTGTGTGGTCTATC     | miRNA | let-7b |
| t0077390 | 21 | 1 TGAGGTAGTAGGATGTGGGGT          | miRNA | let-7b |
| t0077575 | 27 | 1 TGAGGAAGTAGGTTGTATGGTTGAATC    | miRNA | let-7b |
| t0077663 | 21 | 1 TGAGGTAGGAGGTTGTGGGGT          | miRNA | let-7b |
| t0077727 | 22 | 1 TGGGGTATTAGGTTGTGTGGTT         | miRNA | let-7b |
| t0077738 | 22 | 1 TGAGGTGGTAGGTTGTGTGTTT         | miRNA | let-7b |
| t0077976 | 22 | 1 TGAGGTGGTAGTTTGTGTGGTT         | miRNA | let-7b |
| t0078113 | 19 | 1 TGAGATAGTAGGTTGTGTG            | miRNA | let-7b |
| t0078189 | 26 | 1 CGAGGTAGTAGGTTGTGTGGTTAAAA     | miRNA | let-7b |
| t0078205 | 22 | 1 TGAGGTTGTAGGTTGTGGGGTT         | miRNA | let-7b |
| t0078285 | 21 | 1 TGAGGTAGCAGGTTGTGTAGT          | miRNA | let-7b |
| t0078382 | 20 | 1 TGAGGTAGTAGGTTGTGCAG           | miRNA | let-7b |

|          |    |                                 |       |        |
|----------|----|---------------------------------|-------|--------|
| t0078527 | 19 | 1 TGAGGTAGGTTGTGTGGGT           | miRNA | let-7b |
| t0078559 | 25 | 1 TGAGGTAGTAGGGTGTGTGGTTATC     | miRNA | let-7b |
| t0078659 | 26 | 1 TGAGGTAGCAGGTTGTATGGTTAATC    | miRNA | let-7b |
| t0078919 | 25 | 1 TGAGGTAGTAGGCTGTGTGGTTGAT     | miRNA | let-7b |
| t0078952 | 23 | 1 CTGAGGTAGTAGGTTGTGTGGTA       | miRNA | let-7b |
| t0079097 | 21 | 1 TGAGGTAGCAGGTTGTGGGGT         | miRNA | let-7b |
| t0079134 | 22 | 1 TGAGGAAGTAGGTTGTTTGGTT        | miRNA | let-7b |
| t0079191 | 18 | 1 CGAGGTAGTAGGTTGTGT            | miRNA | let-7b |
| t0079238 | 22 | 1 CTGAGGAAGTAGGTTGTGTGGT        | miRNA | let-7b |
| t0079298 | 25 | 1 TGAGGTAGTAGATTGTGTGGTTAAA     | miRNA | let-7b |
| t0079458 | 20 | 1 TGAGGTTGTAGGTTGTGTGG          | miRNA | let-7b |
| t0079639 | 26 | 1 TGAGGTAGTAGGTCGTATGGTTTATC    | miRNA | let-7b |
| t0079851 | 21 | 1 TGAGGAGGTAGGTTGTGTGGT         | miRNA | let-7b |
| t0079927 | 22 | 1 TGAGGTAGTAGGTTGTGAGGTA        | miRNA | let-7b |
| t0079932 | 26 | 1 TGAGGTAGTAGGTTGTGTGGTTCATC    | miRNA | let-7b |
| t0079975 | 19 | 1 TGAGGTAGTAGGATGTGTG           | miRNA | let-7b |
| t0080144 | 21 | 1 TAAGGTAATAGGTTGTGTGGT         | miRNA | let-7b |
| t0080211 | 25 | 1 TGAGGTAGTAGGATGTGTGGTTAAA     | miRNA | let-7b |
| t0080228 | 22 | 1 TGAGGTAGTAGGTTGTCTGGGT        | miRNA | let-7b |
| t0080373 | 22 | 1 TAGGTAGTAGGTTGCGTGGTTA        | miRNA | let-7b |
| t0080431 | 22 | 1 CGAGGTAGTGGGTTGTGTGGTT        | miRNA | let-7b |
| t0080442 | 23 | 1 TGAGGTAGTAGGTTGGTGTGGTTA      | miRNA | let-7b |
| t0080450 | 25 | 1 TAAGGTAGTAGGTTGTGTGGTTTAA     | miRNA | let-7b |
| t0080769 | 23 | 1 GGAGGTAGTAGGTTGTGTGGTTA       | miRNA | let-7b |
| t0080868 | 24 | 1 TGAGGTAGTAGGCTGTGTGGTTAA      | miRNA | let-7b |
| t0080992 | 25 | 1 TGAGGTAGTAGGTTGTATGGCTATA     | miRNA | let-7b |
| t0081251 | 44 | 1 TGAGGTAGTAGGTTGTGTGGTTCGTCTGG | miRNA | let-7b |
| t0081298 | 22 | 1 TGAGGTAGTAGGGTGCCTGGTT        | miRNA | let-7b |
| t0081685 | 21 | 1 GAGGTAGTACGTTGTGTGGTT         | miRNA | let-7b |
| t0081738 | 21 | 1 TGAGGTAGTAGGCTGTGGGGT         | miRNA | let-7b |
| t0081754 | 22 | 1 TGAGGAAGTAGGTAGTGTGGTT        | miRNA | let-7b |
| t0081801 | 22 | 1 TGAGGTAGTAGGTTGGGGGGTT        | miRNA | let-7b |
| t0081858 | 24 | 1 TGAGGTAGTAGGTTGTGCGGTTGA      | miRNA | let-7b |
| t0081897 | 24 | 1 TGGGGTAGTAGGTTGTGTGGTAAT      | miRNA | let-7b |
| t0082026 | 22 | 1 TGTGGTAGTAGGTTGTGTGGGT        | miRNA | let-7b |
| t0082112 | 28 | 1 TGAGGTAGTAGGTTGTATGGTTAAGATC  | miRNA | let-7b |
| t0082163 | 22 | 1 TGAGGTAGTAGGTTGTGTATTT        | miRNA | let-7b |
| t0082203 | 23 | 1 TGAGGCAGTAGGTTGTGTGGTTG       | miRNA | let-7b |
| t0082432 | 21 | 1 TGAGGAAGGAGGTTGTGTGGT         | miRNA | let-7b |
| t0082481 | 23 | 1 TGAGGTAGTAGGTCGTGTGGTAT       | miRNA | let-7b |
| t0082486 | 23 | 1 TGAGGTAGTAGGTTGAGTGGTTT       | miRNA | let-7b |
| t0082677 | 21 | 1 TGAGGTAGTAGGTTGGGGGGT         | miRNA | let-7b |
| t0082718 | 20 | 1 TGAGGTAGTAGGTTGTGCGA          | miRNA | let-7b |
| t0083457 | 24 | 1 TGAGGTAGTAGGTTGTTTGGTTAA      | miRNA | let-7b |
| t0083541 | 25 | 1 TGAGGTAGTAGGTTGTGTGGGTATC     | miRNA | let-7b |
| t0083612 | 21 | 1 TGAGTTACTAGGTTGTGTGGT         | miRNA | let-7b |
| t0083634 | 21 | 1 CGAGGTAGTGGGTTGTGTGGT         | miRNA | let-7b |
| t0084063 | 21 | 1 TGCGGTAGTAGGTTGTGTGGA         | miRNA | let-7b |
| t0084124 | 20 | 1 TGAGGTAGTAGGTTGCGTAG          | miRNA | let-7b |
| t0084352 | 21 | 1 TGAGGCAGTAAGTTGTGTGGT         | miRNA | let-7b |
| t0084449 | 21 | 1 TGAGATAGTAGGTTGTGTAGT         | miRNA | let-7b |
| t0084556 | 19 | 1 GGAGGTAGTAGGTTGTGTG           | miRNA | let-7b |
| t0084782 | 22 | 1 TGAGGTTGTTGGTTGTGTGGTT        | miRNA | let-7b |
| t0084793 | 22 | 1 TGAAGTAGTAGGTTGTGTGGGT        | miRNA | let-7b |
| t0084874 | 21 | 1 TGGGGTAGTAGGTTGTGGGGT         | miRNA | let-7b |
| t0085054 | 21 | 1 TGTGGTAGTTGGTTGTGTGGT         | miRNA | let-7b |
| t0085067 | 21 | 1 TGAGGTAATAGGTTGTGTGGA         | miRNA | let-7b |
| t0085082 | 25 | 1 TGAGGTAGTGGGTTGTGTGGTTAAA     | miRNA | let-7b |

|          |    |                                  |       |        |
|----------|----|----------------------------------|-------|--------|
| t0085198 | 23 | 1 TGAGGTAGTAGGTTATGTGGTAA        | miRNA | let-7b |
| t0085237 | 22 | 1 TGAGGTGGTAGGTTGTGGTT           | miRNA | let-7b |
| t0085387 | 24 | 1 TGAGGTAGTAGGTTGTGTGCTTAA       | miRNA | let-7b |
| t0085556 | 23 | 1 TGAGGTAGAAGGTTGTGTAGTTT        | miRNA | let-7b |
| t0085649 | 41 | 1 TGAGGTAGTAGGTTGTGTGGTTTTCGTTTG | miRNA | let-7b |
| t0085656 | 23 | 1 TGGGGTAGAAGGTTGTGTGGTTA        | miRNA | let-7b |
| t0085688 | 23 | 1 TGAGGTAGTAGGTTGTGTGATTT        | miRNA | let-7b |
| t0085903 | 24 | 1 TGAGGTAGTAGATTGTGTGGTTAG       | miRNA | let-7b |
| t0086091 | 21 | 1 TGAGGAAGTAGGATGTGTGGT          | miRNA | let-7b |
| t0086152 | 23 | 1 TGAGGTAGTAGGCTGTGTGGTAT        | miRNA | let-7b |
| t0086217 | 25 | 1 TGAGGTTGTAGGGTGTGTGGTTATC      | miRNA | let-7b |
| t0086421 | 22 | 1 TGAGGTAGTAGGCTGTGTGGTG         | miRNA | let-7b |
| t0086467 | 23 | 1 CGAGGTAGTAGGTTGTGTGGTAT        | miRNA | let-7b |
| t0086601 | 20 | 1 TGAGGGCGTAGGTTGTGTGG           | miRNA | let-7b |
| t0086775 | 42 | 1 TGAGGTAGTGGGTTGTGTGGTTTGGTTTG  | miRNA | let-7b |
| t0086882 | 24 | 1 TGGGGTAGTAGGTTGTATGGTTAG       | miRNA | let-7b |
| t0087123 | 25 | 1 TGTGGTAGTAGGTTGTGTGGTTATC      | miRNA | let-7b |
| t0087136 | 22 | 1 TGTGGTTGTAGGTTGTGTGGTT         | miRNA | let-7b |
| t0087214 | 24 | 1 TGAGGTAGTAGGTTGTGTGGTATG       | miRNA | let-7b |
| t0087263 | 24 | 1 TGAGGTAGTAGGTTGTGTGGCTTT       | miRNA | let-7b |
| t0087610 | 19 | 1 TGAGGTAGTAGATTGTGTG            | miRNA | let-7b |
| t0087896 | 22 | 1 TGAGGTAGTAAGTTGTGTGGAT         | miRNA | let-7b |
| t0088075 | 24 | 1 TGAGGTAGTAGGTTGTGTGGTTTC       | miRNA | let-7b |
| t0088081 | 24 | 1 TGAGGTATTAGGTTGTGTGGTTAA       | miRNA | let-7b |
| t0088167 | 22 | 1 TGAGGCAGGAGGTTGTGTGGTT         | miRNA | let-7b |
| t0088253 | 22 | 1 TGAGATAGTAGGTTGTGTGTTT         | miRNA | let-7b |
| t0088586 | 21 | 1 TGAGGTGGTAGGTTGTGTGGC          | miRNA | let-7b |
| t0088685 | 23 | 1 TCGGTTAGTAGGTTGTGTGGTAT        | miRNA | let-7b |
| t0088781 | 20 | 1 TGAGGCAGTAGGTTGTGCGG           | miRNA | let-7b |
| t0088964 | 24 | 1 TGAGGTCGTAGGTTGTGTGGTTAT       | miRNA | let-7b |
| t0089443 | 27 | 1 TGAGGCAGTAGGTTGTGTGGTAATATC    | miRNA | let-7b |
| t0089488 | 21 | 1 TGAGGTAGTAGGTTGTGTGCA          | miRNA | let-7b |
| t0089553 | 23 | 1 TGAGGTAGCAGGTTGTGTGGTAT        | miRNA | let-7b |
| t0089594 | 24 | 1 TGAGGTAGTAGGTTCTGTGGTTAG       | miRNA | let-7b |
| t0089663 | 23 | 1 TAAGGTAGTAGGTTGTGTGGTTG        | miRNA | let-7b |
| t0089935 | 26 | 1 TGAGGTAATAGGTTGTGTGGTAAGAA     | miRNA | let-7b |
| t0089972 | 22 | 1 TGAGGTAGTCAGTTGTGTGGTT         | miRNA | let-7b |
| t0090033 | 22 | 1 TCAGGTAGTAGGTTGTGTGGTA         | miRNA | let-7b |
| t0090060 | 24 | 1 TGAGGTAGTAGGTTGTGCGGTTTT       | miRNA | let-7b |
| t0090089 | 23 | 1 TGAGGAAGTAGGTTGTGTGGTTG        | miRNA | let-7b |
| t0090143 | 24 | 1 TGAGGTAGTAGGTCGTGTGGTTAG       | miRNA | let-7b |
| t0090158 | 23 | 1 TGAGGTCGTAGGTTGTGTGGTTA        | miRNA | let-7b |
| t0090287 | 22 | 1 TGGGGTAGTAGGTTGTTGGTT          | miRNA | let-7b |
| t0090293 | 22 | 1 TGATGTAGTAGGGTGTGTGGTT         | miRNA | let-7b |
| t0090396 | 25 | 1 TGAGGTAGTAGGTTGGGTGGTTATC      | miRNA | let-7b |
| t0090515 | 21 | 1 TGAGGAAGTAGGTCGTGTGGT          | miRNA | let-7b |
| t0090546 | 24 | 1 TCGGTTAGTAGGTTGTGTGGTTAT       | miRNA | let-7b |
| t0090557 | 21 | 1 TGAGGTAGGAGGTTGTGTGGG          | miRNA | let-7b |
| t0090739 | 20 | 1 TGAGGAAGTAGGTTGTGTGT           | miRNA | let-7b |
| t0090773 | 24 | 1 TGAGGTAGTAGGTTGTGTGGAAAA       | miRNA | let-7b |
| t0090827 | 22 | 1 TGAGGTAGGAGGTTGGGTGGTT         | miRNA | let-7b |
| t0090874 | 23 | 1 TGAGGTGGTAGGTTGTGTGGTTG        | miRNA | let-7b |
| t0091246 | 22 | 1 TGAGGTAGTAGGTTCTGCGGTT         | miRNA | let-7b |
| t0091311 | 22 | 1 TGAGGTAGGAGGTTGTGGGGTT         | miRNA | let-7b |
| t0091335 | 18 | 1 TGAGGTGGTAGGTTGTGT             | miRNA | let-7b |
| t0091446 | 21 | 1 TGAGGAAGTAGGTTGTGGGGT          | miRNA | let-7b |
| t0091466 | 22 | 1 TGAAGTAGTAGATTGTGTGGTT         | miRNA | let-7b |
| t0091689 | 22 | 1 TGAGGTAGTATGTTGTGTAGTT         | miRNA | let-7b |

|          |    |                              |       |          |
|----------|----|------------------------------|-------|----------|
| t0091826 | 19 | 1 TGAGGTAGGAGGTGTGGTT        | miRNA | let-7a   |
| t0091975 | 18 | 1 TGAGGTAGCAGGTGTGGT         | miRNA | let-7a   |
| t0092056 | 21 | 1 TGAGGTAGTAGGTTGGGTGTT      | miRNA | let-7a   |
| t0092222 | 22 | 1 TGAGGTAGTAGATTTGATAGGT     | miRNA | let-7a   |
| t0092453 | 23 | 1 TGAGGTAGTAGATTTGGATAGTT    | miRNA | let-7a   |
| t0092456 | 19 | 1 TGAGGTAGTAGTTGTGGTG        | miRNA | let-7a   |
| t0092783 | 20 | 1 TGAGGTAGTAGGTTGGGGGT       | miRNA | let-7a   |
| t0092790 | 22 | 1 TGAGGTAGTAGGTTCTGTGGAA     | miRNA | let-7a   |
| t0092950 | 24 | 1 TGGGGTAGTAGGTTGTATAGTATC   | miRNA | let-7-5p |
| t0093243 | 24 | 1 TGAGGTAGGAGTTGTATGGTATC    | miRNA | let-7-5p |
| t0093249 | 22 | 1 TGAGGTCGTAGGTTGTATAGTG     | miRNA | let-7-5p |
| t0093304 | 25 | 1 TGAGGTAGTAGGTTGTATGGTCATC  | miRNA | let-7-5p |
| t0093410 | 22 | 1 TGAGGTAGTAGGTTGTATGATC     | miRNA | let-7-5p |
| t0041290 | 22 | 1 TGAGGTAGTAGGTTGTATCGTA     | miRNA | let-7-5p |
| t0043686 | 24 | 1 TGAGGTAGTAGGTTGCATAGTATC   | miRNA | let-7-5p |
| t0053134 | 22 | 1 TGAGGTAGTAGGTTGTATTGTA     | miRNA | let-7-5p |
| t0060225 | 23 | 1 TGAGGAAGTAGGTTGTATAGTAT    | miRNA | let-7-5p |
| t0069769 | 22 | 1 TGAGGTAGTAGGTTGTATGGTG     | miRNA | let-7-5p |
| t0080393 | 24 | 1 TGAGGTAGTAGGTTGTATAGTAAA   | miRNA | let-7-5p |
| t0086158 | 24 | 1 TTAGGTAGTAGGTTGTATGGTATC   | miRNA | let-7-5p |
| t0088001 | 23 | 1 TGAGGTAGTAGGTTGTATAGTGT    | miRNA | let-7-5p |
| t0040950 | 22 | 1 TGAGGTGGTAGGTTGTATAGTA     | miRNA | let-7-5p |
| t0042237 | 24 | 1 TGAGGTAGTAGGCTGTATAGTATC   | miRNA | let-7-5p |
| t0042241 | 24 | 1 TGAGGTAGTAGGTTGTATGGTGTC   | miRNA | let-7-5p |
| t0043208 | 22 | 1 TGAGGTAGTAGGTTGCATAGTA     | miRNA | let-7-5p |
| t0045820 | 23 | 1 TAAGGTAGTAGGTTGTATAGTAA    | miRNA | let-7-5p |
| t0046950 | 24 | 1 TGAGGTAGTAGCTTGTATAGTATC   | miRNA | let-7-5p |
| t0047485 | 21 | 1 TGGGTAGTAGGTTGTATAGTA      | miRNA | let-7-5p |
| t0048794 | 22 | 1 TGTGGTAGTAGGTTGTATAGTA     | miRNA | let-7-5p |
| t0049012 | 24 | 1 TGAGGTAGTAGGTCGTATAGTATC   | miRNA | let-7-5p |
| t0050690 | 23 | 1 TGAGGTAGTAGGTTGTATAGTCA    | miRNA | let-7-5p |
| t0052323 | 22 | 1 TGAGGTAGTAGGTTGTACAGTA     | miRNA | let-7-5p |
| t0053679 | 26 | 1 TGAGGTAGTCGGTTGTATGGTAAATC | miRNA | let-7-5p |
| t0055413 | 22 | 1 TGAGGTAGTAGTTTGTAAAGTA     | miRNA | let-7-5p |
| t0058031 | 22 | 1 CGAGGTAGTAGGTTGTATAGTA     | miRNA | let-7-5p |
| t0059734 | 22 | 1 TGAGGTAGTAGGTTGTGTAGAA     | miRNA | let-7-5p |
| t0060878 | 24 | 1 TGAGGTAGTAGGTTGTATGGTCTC   | miRNA | let-7-5p |
| t0061220 | 24 | 1 TGAGGTAGTAGGCTGTATGGTATC   | miRNA | let-7-5p |
| t0062746 | 25 | 1 TGAGGTAGTAGCTTGTATAGTCCGG  | miRNA | let-7-5p |
| t0063543 | 23 | 1 TGAGGTGGTAGGTTGTATAGTAA    | miRNA | let-7-5p |
| t0064001 | 25 | 1 TTGAGGTAGTAGGTTGTATGGTATC  | miRNA | let-7-5p |
| t0064560 | 23 | 1 TGAGGTAGTAGGTTGTATGGTAT    | miRNA | let-7-5p |
| t0065222 | 22 | 1 TGAGGAAGTAGGTTGTATAGTA     | miRNA | let-7-5p |
| t0065897 | 23 | 1 TGAGGTAGTAGGTTGTACAGTAA    | miRNA | let-7-5p |
| t0066310 | 22 | 1 TGAGGTAGTAGGCTGTATAGTG     | miRNA | let-7-5p |
| t0068038 | 22 | 1 TGAGGTAGTAGGGTGTATAGTG     | miRNA | let-7-5p |
| t0068093 | 22 | 1 TGAGGTAGTAGGTTGTATGGTC     | miRNA | let-7-5p |
| t0071390 | 23 | 1 TGAGGTAGTAGGTTGTGTAGTAA    | miRNA | let-7-5p |
| t0072023 | 24 | 1 TGAGGTAGTAGGTTGTATGGTATA   | miRNA | let-7-5p |
| t0076930 | 23 | 1 TGAGGTAGTAGGTCGTATAGTTT    | miRNA | let-7    |
| t0077066 | 19 | 1 TGAGGTAGTAGGTTGTATAGTATA   | miRNA | let-7    |
| t0081924 | 21 | 1 TGAGGGGGTAGGTTGTATAGT      | miRNA | let-7    |
| t0083134 | 22 | 1 TGATGTAGTAGGCTGTATAGTT     | miRNA | let-7    |
| t0083749 | 21 | 1 GTGAGGAAGTAGGTTGTATAG      | miRNA | let-7    |
| t0084221 | 23 | 1 TGAGGTGGTAGGTTGTATAGTTG    | miRNA | let-7    |
| t0085066 | 22 | 1 AGACGTAGTAGGTTGTATAGTT     | miRNA | let-7    |
| t0085559 | 22 | 1 TGAGGTAGTAGGTTGTACAGGT     | miRNA | let-7    |
| t0085869 | 20 | 1 TGAGGTAGTAGGTTGTAGAG       | miRNA | let-7    |

|          |    |                              |       |       |
|----------|----|------------------------------|-------|-------|
| t0086131 | 22 | 1 TGCGGTAGTAGGCTGTATAGTT     | miRNA | let-7 |
| t0089290 | 21 | 1 TGAGGCAGTAGGATGTATAGT      | miRNA | let-7 |
| t0091266 | 22 | 1 TGAGGTAGTAGGGTCTATAGTT     | miRNA | let-7 |
| t0091682 | 21 | 1 TGGGGAAGTAGGTTGTATAGT      | miRNA | let-7 |
| t0040868 | 23 | 1 TGAGGTAGCAGGTTGTATAGTTG    | miRNA | let-7 |
| t0041434 | 23 | 1 CTGAGGAAGTAGGTTGTATAGTT    | miRNA | let-7 |
| t0041673 | 20 | 1 TGAGGTAGTAGGTTGGTATAG      | miRNA | let-7 |
| t0042263 | 23 | 1 TGAGGTAGTCGGTTGTATAGTTA    | miRNA | let-7 |
| t0042404 | 22 | 1 TGAGGTAGTAGGTTGGATCGTT     | miRNA | let-7 |
| t0042482 | 22 | 1 TGAGGTAGTAGGTTGTACAGAT     | miRNA | let-7 |
| t0043142 | 19 | 1 TGAGGTAGTAGGTTGTATC        | miRNA | let-7 |
| t0043418 | 21 | 1 TGGGTAGTAGGTTGTATAGTT      | miRNA | let-7 |
| t0043521 | 23 | 1 TGAGGTAGTAGGTTGTACAGTTT    | miRNA | let-7 |
| t0043622 | 21 | 1 TAAGGTAGTAGGTCGTATAGT      | miRNA | let-7 |
| t0044380 | 23 | 1 TGAGGTAGTAGGCTGTATAGTTT    | miRNA | let-7 |
| t0044453 | 23 | 1 TGAGGTAGTAGGTTGTATCGTTT    | miRNA | let-7 |
| t0044647 | 20 | 1 TGAGGTAGTAGGGTGGATAG       | miRNA | let-7 |
| t0044668 | 23 | 1 TGAGGTAGTACGTTGTATAGTTA    | miRNA | let-7 |
| t0045487 | 25 | 1 TGAGGTAGTAGGTTGTATAGTTGTC  | miRNA | let-7 |
| t0045507 | 21 | 1 TGAGATAGTAGGTTGAATAGT      | miRNA | let-7 |
| t0045617 | 22 | 1 TGAGGTAGCAGGTTCTATAGTT     | miRNA | let-7 |
| t0046423 | 21 | 1 TGAGGTAGTAGGACGTATAGT      | miRNA | let-7 |
| t0046493 | 23 | 1 TGAGGTAGTGGGTTGTATAGTTA    | miRNA | let-7 |
| t0046604 | 23 | 1 TGAGGCAGTAGGTTGTATAGTTT    | miRNA | let-7 |
| t0046840 | 22 | 1 TGAGATTGTAGGTTGTATAGTT     | miRNA | let-7 |
| t0047274 | 23 | 1 TGGGGTAGTAGGTTGTATAGTTT    | miRNA | let-7 |
| t0047333 | 18 | 1 TGAGGTAGTAGGGTGTAT         | miRNA | let-7 |
| t0047354 | 20 | 1 TGAGGTAGTAGGATGTATAC       | miRNA | let-7 |
| t0047433 | 21 | 1 TGAGGTAGTGGGTTGTTAGT       | miRNA | let-7 |
| t0047801 | 22 | 1 CTGAGGAAGTAGGTTGTATAGT     | miRNA | let-7 |
| t0047810 | 23 | 1 TGAGGTAGGAGGTTGTATAGTTT    | miRNA | let-7 |
| t0048557 | 20 | 1 GAGGAAGTAGGTTGTATAGT       | miRNA | let-7 |
| t0048634 | 25 | 1 TGAGGTAGTAGGTTGTATAGTTATA  | miRNA | let-7 |
| t0048886 | 23 | 1 TGAGGTAGTAGGTTGTATAGGTA    | miRNA | let-7 |
| t0048910 | 20 | 1 TGGGGTAGTAGGTTGTATCG       | miRNA | let-7 |
| t0048929 | 21 | 1 TGCGGTAGTAGGTTGCATAGT      | miRNA | let-7 |
| t0049132 | 20 | 1 TGAGGTTGTAGGTTGTATAG       | miRNA | let-7 |
| t0049234 | 20 | 1 TGAGGTAGGAGGTCGTATAG       | miRNA | let-7 |
| t0049284 | 21 | 1 TGAGGTAGTAGGGTGTATACT      | miRNA | let-7 |
| t0049633 | 19 | 1 TGAGGTAATAGGTTGTATA        | miRNA | let-7 |
| t0049657 | 21 | 1 GTGAGGTCGTAGGTTGTATAG      | miRNA | let-7 |
| t0049760 | 20 | 1 CGAGGTAGTAGGTTGTATAA       | miRNA | let-7 |
| t0050032 | 21 | 1 TGCGGTAGTAGGTTGTATATT      | miRNA | let-7 |
| t0050051 | 20 | 1 CGGGGTAGTAGGTTGTATAG       | miRNA | let-7 |
| t0050296 | 23 | 1 TGCGGTAGTAGGTTGTATAGTTG    | miRNA | let-7 |
| t0050477 | 22 | 1 TGAGGAAGTAGGCTGTATAGTT     | miRNA | let-7 |
| t0050481 | 22 | 1 TGAGATAGTAGGTTGTATTGTT     | miRNA | let-7 |
| t0050764 | 21 | 1 TAAGGTAGTTGTTGTATAGT       | miRNA | let-7 |
| t0050925 | 21 | 1 TGAGATAGTAGGTTGTAAAGT      | miRNA | let-7 |
| t0051105 | 22 | 1 TGAGGTAGTAAGCTGTATAGTT     | miRNA | let-7 |
| t0051199 | 21 | 1 GAGGAAGTAGGTTGTATAGTT      | miRNA | let-7 |
| t0051428 | 23 | 1 TGAGGTAGTAGGTTCTATAGTTG    | miRNA | let-7 |
| t0051699 | 21 | 1 CGGGGTAGTAGGTTGTATAGT      | miRNA | let-7 |
| t0051799 | 21 | 1 TGAGGTGGTGGGTTGTATAGT      | miRNA | let-7 |
| t0052444 | 19 | 1 TGACGTAGTAGGTTGTATA        | miRNA | let-7 |
| t0053114 | 24 | 1 TGAGGAAGTAGGTTGTATAGTTAA   | miRNA | let-7 |
| t0053151 | 26 | 1 TGAGGTAGTAGGGTGTATAGTTAATC | miRNA | let-7 |
| t0053463 | 21 | 1 TGAGGTAGTTGGTTATATAGT      | miRNA | let-7 |

|          |    |                                  |       |       |
|----------|----|----------------------------------|-------|-------|
| t0054635 | 22 | 1 TGAGGTAGGAGGTTGTACAGTT         | miRNA | let-7 |
| t0054758 | 19 | 1 TGAGGTAGAAGGTTGTATA            | miRNA | let-7 |
| t0054923 | 20 | 1 TGAGGTAGTAGGGTCTATAG           | miRNA | let-7 |
| t0055854 | 23 | 1 TGAGGTAGTAGGTTGGATAGTTA        | miRNA | let-7 |
| t0056140 | 19 | 1 TGAAGTAGTAGGTTGTATA            | miRNA | let-7 |
| t0056229 | 20 | 1 TGAGGAAGTAGGTTGTACAG           | miRNA | let-7 |
| t0056598 | 23 | 1 TGAGGTAGTAGGCTGTATAGTTA        | miRNA | let-7 |
| t0057375 | 22 | 1 GGAGGTAGTATGTTGTATAGTT         | miRNA | let-7 |
| t0057435 | 20 | 1 GAGGTAGTATGTTGTATAGC           | miRNA | let-7 |
| t0057708 | 23 | 1 TAAGGTAGTAGGTTGTATAGTTG        | miRNA | let-7 |
| t0058230 | 21 | 1 TGAGGTAGTAGGGTGTATAGA          | miRNA | let-7 |
| t0058570 | 25 | 1 TGAGGCAGTAGGTTGTATAGTTATC      | miRNA | let-7 |
| t0058611 | 21 | 1 TGAGGTAGAAGGATGTATAGT          | miRNA | let-7 |
| t0058718 | 22 | 1 TGACGTACTAGGTTGTATAGTT         | miRNA | let-7 |
| t0058815 | 23 | 1 TGAGGTAGTAGGCTGTATAGTTG        | miRNA | let-7 |
| t0059254 | 22 | 1 TGCGGTAGTAGGTTGTTTAGTT         | miRNA | let-7 |
| t0059443 | 21 | 1 TGCGGAAGTAGGTTGTATAGT          | miRNA | let-7 |
| t0059790 | 22 | 1 TGAAGTACTAGGTTGTATAGTT         | miRNA | let-7 |
| t0060299 | 25 | 1 TGAGGTAGTAGGTTGTAAAGTTATC      | miRNA | let-7 |
| t0060508 | 19 | 1 TGAGATAGTAGGTTGTATA            | miRNA | let-7 |
| t0060813 | 20 | 1 TGGGGTAGTAGGTTGTATAA           | miRNA | let-7 |
| t0061414 | 21 | 1 TGAGGTAGTAGGTTTTATTGT          | miRNA | let-7 |
| t0061608 | 21 | 1 TGAGGTAGGAGGTTGGATAGT          | miRNA | let-7 |
| t0062171 | 23 | 1 TCAGGTAGTAGGTTGTATAGTTA        | miRNA | let-7 |
| t0062205 | 25 | 1 TGAGGTAGTAGGGTGTATAGTTATC      | miRNA | let-7 |
| t0062702 | 19 | 1 TGAGGTAGTAGGTTATATA            | miRNA | let-7 |
| t0063212 | 20 | 1 TGCGGTAGTAGGCTGTATAG           | miRNA | let-7 |
| t0063460 | 21 | 1 GGAGGTGGTAGGTTGTATAGT          | miRNA | let-7 |
| t0063498 | 23 | 1 TGAGGTAGTAGGGTGTATAGTTT        | miRNA | let-7 |
| t0063596 | 20 | 1 GAGGTAGTAGGTTGTATAGC           | miRNA | let-7 |
| t0064017 | 25 | 1 TGGGGTAGTAGGTTGTATAGTTATC      | miRNA | let-7 |
| t0065053 | 18 | 1 TGAGGTAGTGGGTTGTAT             | miRNA | let-7 |
| t0066555 | 22 | 1 TGAGGGGGTAGGTTGTATAGTT         | miRNA | let-7 |
| t0066914 | 21 | 1 TGAGTTAGTAGGTTGTACAGT          | miRNA | let-7 |
| t0067170 | 22 | 1 TGTGGTTGTAGGTTGTATAGTT         | miRNA | let-7 |
| t0067343 | 21 | 1 TGCGGTCGTAGGTTGTATAGT          | miRNA | let-7 |
| t0067346 | 23 | 1 TGAGGTAGTAAGTTGTATAGTTG        | miRNA | let-7 |
| t0067465 | 22 | 1 TGAGGTAGCAGGCTGTATAGTT         | miRNA | let-7 |
| t0067716 | 22 | 1 TGAGGTAGTAGGTTGTACCGTT         | miRNA | let-7 |
| t0067803 | 22 | 1 TGAGGAAGTAGGTTGGATAGTT         | miRNA | let-7 |
| t0068575 | 23 | 1 TGAGGCAGTAGGTTGTATAGTTA        | miRNA | let-7 |
| t0069144 | 21 | 1 TGTGGTAGTAGGTTGTTTAGT          | miRNA | let-7 |
| t0069472 | 21 | 1 TGAGGTAGTAGGGTGAATAGT          | miRNA | let-7 |
| t0069756 | 25 | 1 TGAGGTAGTAGGTTGTATAGTTACA      | miRNA | let-7 |
| t0070533 | 22 | 1 TGAGGTAGTAGGTTGTATATCT         | miRNA | let-7 |
| t0070755 | 23 | 1 TGAGGCAGTAGGTTGTATAGTTG        | miRNA | let-7 |
| t0071288 | 20 | 1 TGAGGTAGTAGGGTGAATAG           | miRNA | let-7 |
| t0071674 | 20 | 1 TGAGGTAGTAGGGTGTCTAG           | miRNA | let-7 |
| t0071938 | 22 | 1 TGGGGTAGTAGGTTGTACAGTT         | miRNA | let-7 |
| t0071965 | 22 | 1 TGAGGTAGTCGTTGTATATTT          | miRNA | let-7 |
| t0072041 | 42 | 1 TGAGGTAGTAGGTTGTATTGTTTGTGTGTC | miRNA | let-7 |
| t0072408 | 21 | 1 TGACGTACTAGGTTGTATAGT          | miRNA | let-7 |
| t0072569 | 20 | 1 GAGGCAGTAGGTTGTATAGT           | miRNA | let-7 |
| t0072588 | 23 | 1 TGAGGTAGGAGGTTGTATATTTG        | miRNA | let-7 |
| t0072930 | 19 | 1 TGAGGTACTAGGTTGTATA            | miRNA | let-7 |
| t0073269 | 21 | 1 TGAGGTAGTATGTTTTATAGT          | miRNA | let-7 |
| t0073886 | 19 | 1 TGAGGTAGTAGGTTGAATA            | miRNA | let-7 |
| t0075688 | 22 | 1 TGAGGCAGTAGGTTGTATATTT         | miRNA | let-7 |

|          |    |   |                           |       |        |
|----------|----|---|---------------------------|-------|--------|
| t0076195 | 21 | 1 | GAGGTAGTGGGTTGTATAGTT     | miRNA | let-7  |
| t0077179 | 20 | 1 | TGAGGTGGTAGGTTGTATAA      | miRNA | let-7  |
| t0077257 | 21 | 1 | TGAGCTGGTAGGTTGTATAGT     | miRNA | let-7  |
| t0077967 | 19 | 1 | TGAGGTAGTAGGTTGGATA       | miRNA | let-7  |
| t0078096 | 23 | 1 | TGAGGTAGTAGGATGTATAGTTT   | miRNA | let-7  |
| t0078240 | 21 | 1 | TGAGGTAGTAGGATATATAGT     | miRNA | let-7  |
| t0078404 | 22 | 1 | CGAGGTAGTAGGTTGTATTGTT    | miRNA | let-7  |
| t0078918 | 21 | 1 | TGGGGTAGTAGGTTGTTTAGT     | miRNA | let-7  |
| t0078948 | 19 | 1 | TGAGGTAGTAGGTTCTATA       | miRNA | let-7  |
| t0079054 | 20 | 1 | TGAGGTAGTAGGTTGTAGAT      | miRNA | let-7  |
| t0079113 | 21 | 1 | TGAGGCAGTAGGGTGTATAGT     | miRNA | let-7  |
| t0079386 | 19 | 1 | TGAGGTAGTATGTTGTATA       | miRNA | let-7  |
| t0080087 | 22 | 1 | TAAGGAAGTAGGTTGTATAGTT    | miRNA | let-7  |
| t0080173 | 24 | 1 | TGAGGTAGTAGGTTGTATAGTTTC  | miRNA | let-7  |
| t0080277 | 21 | 1 | CGAGGTAGTAGGTCGTATAGT     | miRNA | let-7  |
| t0080554 | 23 | 1 | TGAGGTAGTAGGTTGTATAGCTT   | miRNA | let-7  |
| t0080606 | 22 | 1 | TGAGGAAGTTGGTTGTATAGTT    | miRNA | let-7  |
| t0081047 | 21 | 1 | TGAGGTGGAAGTTGTATAGT      | miRNA | let-7  |
| t0081280 | 22 | 1 | TGGGGTAGTAGGTTGTATATTT    | miRNA | let-7  |
| t0081657 | 20 | 1 | TAAGGTGGTAGGTTGTATAG      | miRNA | let-7  |
| t0081732 | 18 | 1 | TGAGTTGTAGTTGTAT          | miRNA | let-7  |
| t0082472 | 23 | 1 | TGAGGTAGTAGGTTGTAAAGTTA   | miRNA | let-7  |
| t0082699 | 19 | 1 | TGAGGTAGTTGGTTGTATA       | miRNA | let-7  |
| t0082787 | 25 | 1 | TGAGGTAATAGGTTGTATAGTTATC | miRNA | let-7  |
| t0082970 | 22 | 1 | GTTTGAGGCAGTAGGTTGTATA    | miRNA | let-7  |
| t0083356 | 22 | 1 | TGAAGTAGTAGGCTGTATAGTT    | miRNA | let-7  |
| t0083395 | 21 | 1 | TGAGGTAGCAGGCTGTATAGT     | miRNA | let-7  |
| t0083529 | 22 | 1 | TGAGCTAGCAGGTTGTATAGTT    | miRNA | let-7  |
| t0083642 | 21 | 1 | GGAGGTAGTAGGTTGGATAGT     | miRNA | let-7  |
| t0083736 | 22 | 1 | TGAGGTAGTAGGTTGAATTGTT    | miRNA | let-7  |
| t0084491 | 19 | 1 | TGAGGTAGTAGGTTGTACA       | miRNA | let-7  |
| t0085336 | 22 | 1 | TGAGGTAGAGGGTTGTATAGTT    | miRNA | let-7  |
| t0085402 | 23 | 1 | TGAGGTAGTAGGATGTATAGTTG   | miRNA | let-7  |
| t0085611 | 19 | 1 | TGAGGTAGTAGGTTGCATA       | miRNA | let-7  |
| t0085763 | 23 | 1 | TGAGGTCGTAGGTTGTATAGTTG   | miRNA | let-7  |
| t0085775 | 23 | 1 | TGAGGTAGTAGGTTGTATTGTTG   | miRNA | let-7  |
| t0086513 | 22 | 1 | TGAGGTTGTAGGTTGTATATTT    | miRNA | let-7  |
| t0087909 | 20 | 1 | TGAGGGGGTAGGTTGTATAG      | miRNA | let-7  |
| t0088153 | 23 | 1 | TGAGGTAGTAGGATGTATAGTTA   | miRNA | let-7  |
| t0088251 | 23 | 1 | TGTGGTAGTAGGTTGTATAGTTT   | miRNA | let-7  |
| t0088355 | 22 | 1 | CTGAGGTAGTAGGTTGTCTAGT    | miRNA | let-7  |
| t0088576 | 21 | 1 | TGAGGTCGTAGGTTGTCTAGT     | miRNA | let-7  |
| t0088755 | 23 | 1 | TGAGGTAGTAGGTTGTATAGATT   | miRNA | let-7  |
| t0089263 | 18 | 1 | TGAGGTATTAGGTTGTAT        | miRNA | let-7  |
| t0089387 | 23 | 1 | TGAGGTAGTTGGTTGTATAGTTA   | miRNA | let-7  |
| t0089457 | 23 | 1 | TGAGCTAGTAGGTTGTATAGTTT   | miRNA | let-7  |
| t0089475 | 23 | 1 | TGAGGTAGCAGGTTGTATAGTTA   | miRNA | let-7  |
| t0090399 | 21 | 1 | TGCGGTAGTAGGCTGTATAGT     | miRNA | let-7  |
| t0090489 | 22 | 1 | TGGGGTAGTAGGATGTATAGTT    | miRNA | let-7  |
| t0090692 | 20 | 1 | TGGGGTAGTAGGTTGTTTAG      | miRNA | let-7  |
| t0090967 | 22 | 1 | TGAGGTGGTAGGTTGTACAGTT    | miRNA | let-7  |
| t0091046 | 22 | 1 | TGAGATCATTGCGAAGGCCACT    | miRNA | bantam |
| t0091183 | 22 | 1 | TGAGATCATTGTGAAGGACACT    | miRNA | bantam |

#### nRBCs

| Seq ID   | Length | Read Count | Seq                    | Category | Annotation   |
|----------|--------|------------|------------------------|----------|--------------|
| t0000001 | 21     | 230509     | AAACCGTTACCATTACTGAGT  | miRNA    | hsa-mir-451a |
| t0000003 | 22     | 174024     | TTTGGCAATGGTAGAACTCACA | miRNA    | hsa-mir-182  |



|          |    |        |                           |       |                |
|----------|----|--------|---------------------------|-------|----------------|
| t0000005 | 24 | 159790 | TTTGGCAATGGTAGAACTCACACT  | miRNA | hsa-mir-182    |
| t0000006 | 22 | 136475 | TAGCAGCACGTAATATTGGCG     | miRNA | hsa-mir-16-2   |
| t0000007 | 22 | 126146 | AAACCGTTACCATTACTGAGTT    | miRNA | hsa-mir-451a   |
| t0000008 | 22 | 119769 | TGAGGTAGTAGTTTGTGCTGTT    | miRNA | hsa-let-7i     |
| t0000009 | 22 | 100272 | TATTGCACTTGTCCCGGCCTGT    | miRNA | hsa-mir-92a-2  |
| t0000010 | 22 | 91019  | TGAGGTAGTAGATTGTATAGTT    | miRNA | hsa-let-7f-2   |
| t0000011 | 20 | 80084  | TCCTGTA CTGAGCTGCCCCG     | miRNA | hsa-mir-486    |
| t0000012 | 21 | 76791  | TGAGGTAGTAGGTTGTATAGT     | miRNA | hsa-let-7a-3   |
| t0000013 | 23 | 67678  | AAACCGTTACCATTACTGAGTTT   | miRNA | hsa-mir-451a   |
| t0000014 | 22 | 57560  | AACATTCAACGCTGTCGGTGAG    | miRNA | hsa-mir-181a-1 |
| t0000015 | 22 | 56715  | CATTGCACTTGTCTCGGTCTGA    | miRNA | hsa-mir-25     |
| t0000016 | 22 | 52930  | TGAGGTAGTAGGTTGTATAGTT    | miRNA | hsa-let-7a-3   |
| t0000017 | 19 | 47538  | AGCAGCATTGTACAGGGCT       | miRNA | hsa-mir-107    |
| t0000018 | 21 | 38124  | TGAGGGGCAGAGAGCGAGACT     | miRNA | hsa-mir-423    |
| t0000020 | 20 | 31976  | CCCATAAAGTAGAAAGCACT      | miRNA | hsa-mir-142    |
| t0000021 | 22 | 27859  | TTCAAGTAATCCAGGATAGGCT    | miRNA | hsa-mir-26a-2  |
| t0000022 | 22 | 26767  | AAGCTGCCAGTTGAAGA ACTGT   | miRNA | hsa-mir-22     |
| t0000023 | 21 | 25774  | TATTGCACTTGTCCCGGCCTG     | miRNA | hsa-mir-92a-2  |
| t0000025 | 20 | 24468  | TTTGGCAATGGTAGAACTCA      | miRNA | hsa-mir-182    |
| t0000027 | 23 | 20255  | GGATATCATCATATACTGTAAGT   | miRNA | hsa-mir-144    |
| t0000028 | 20 | 18060  | CATTGCACTTGTCTCGGTCT      | miRNA | hsa-mir-25     |
| t0000029 | 23 | 17256  | TATTGCACTTGTCCCGGCCTGTT   | miRNA | hsa-mir-92a-1  |
| t0000030 | 20 | 16205  | TAGCAGCACATAATGGTTTG      | miRNA | hsa-mir-15a    |
| t0000033 | 23 | 15009  | CAACGGAATCCCAAAGCAGCTG    | miRNA | hsa-mir-191    |
| t0000036 | 22 | 13538  | TACAGTACTGTGATAACTGAA G   | miRNA | hsa-mir-101-2  |
| t0000037 | 21 | 13340  | CATTATTACTTTTGGTACGCG     | miRNA | hsa-mir-126    |
| t0000038 | 21 | 13017  | TAGCAGCACGTAATATTGGC      | miRNA | hsa-mir-16-2   |
| t0000039 | 23 | 12866  | AACATTCAACGCTGTCGGTGAGT   | miRNA | hsa-mir-181a-1 |
| t0000040 | 20 | 12719  | CCGCACTGTGGGTA CTTGCT     | miRNA | hsa-mir-106b   |
| t0000042 | 21 | 12475  | CTGACCTATGAATTGACAGCC     | miRNA | hsa-mir-192    |
| t0000043 | 21 | 12292  | CAAAGTGCTGTTCGTGCAGGT     | miRNA | hsa-mir-93     |
| t0000044 | 20 | 12180  | ACCAATATTACTGTGCTGCT      | miRNA | hsa-mir-16-2   |
| t0000045 | 20 | 11887  | AAACCGTTACCATTACTGAG      | miRNA | hsa-mir-451a   |
| t0000046 | 22 | 11790  | TACCGCACTGTGGGTA CTTGCT   | miRNA | hsa-mir-106b   |
| t0000047 | 24 | 11697  | TGTAAACATCCTTGACTGGAAGCT  | miRNA | hsa-mir-30e    |
| t0000048 | 21 | 11601  | TGAGGTAGTAGTTTGTGCTGT     | miRNA | hsa-let-7i     |
| t0000049 | 20 | 11453  | CTGTA CTGAGCTGCCCCGAG     | miRNA | hsa-mir-486    |
| t0000050 | 21 | 9552   | TGAGGTAGTAGTTTGTACAGT     | miRNA | hsa-let-7g     |
| t0000051 | 22 | 9447   | AGCAGCATTGTACAGGGCTATG    | miRNA | hsa-mir-103a-1 |
| t0000053 | 21 | 8892   | CATAAAGTAGAAAGCACTACT     | miRNA | hsa-mir-142    |
| t0000056 | 23 | 8820   | TTTGGCAATGGTAGAACTCACAC   | miRNA | hsa-mir-182    |
| t0000057 | 21 | 8776   | CATTGCACTTGTCTCGGTCTG     | miRNA | hsa-mir-25     |
| t0000059 | 22 | 8647   | GGATATCATCATATACTGTAAG    | miRNA | hsa-mir-144    |
| t0000060 | 21 | 8060   | TACAGTACTGTGATAACTGAA     | miRNA | hsa-mir-101-2  |
| t0000062 | 23 | 7574   | TGAGGGGCAGAGAGCGAGACTTT   | miRNA | hsa-mir-423    |
| t0000063 | 19 | 7460   | TGAGGTAGTAGGTTGTATA       | miRNA | hsa-let-7a-3   |
| t0000067 | 21 | 7318   | TTTGGCAATGGTAGAACTCAC     | miRNA | hsa-mir-182    |
| t0000069 | 23 | 7313   | TCCTGTA CTGAGCTGCCCCGAGG  | miRNA | hsa-mir-486    |
| t0000071 | 22 | 7121   | TGAGGTAGTAGTTTGTACAGTT    | miRNA | hsa-let-7g     |
| t0000072 | 21 | 6888   | AAGCTGCCAGTTGAAGA ACTG    | miRNA | hsa-mir-22     |
| t0000073 | 21 | 6323   | AGCAGCATTGTACAGGGCTAT     | miRNA | hsa-mir-107    |
| t0000076 | 23 | 6022   | AGCAGCATTGTACAGGGCTATGA   | miRNA | hsa-mir-103a-1 |
| t0000077 | 21 | 5978   | ACCAATATTACTGTGCTGCTT     | miRNA | hsa-mir-16-2   |
| t0000078 | 19 | 5900   | TCCTGTA CTGAGCTGCCCC      | miRNA | hsa-mir-486    |
| t0000082 | 22 | 5693   | TGAGGGGCAGAGAGCGAGACTT    | miRNA | hsa-mir-423    |
| t0000083 | 20 | 5391   | TACAGTATAGATGATGTA CT     | miRNA | hsa-mir-144    |
| t0000086 | 21 | 5117   | GTACAGTACTGTGATAACTGA     | miRNA | hsa-mir-101-2  |
| t0000088 | 24 | 5067   | TGTAAACATCCCGCA CTGGAAGCT | miRNA | hsa-mir-30d    |

|          |    |      |                            |       |                |
|----------|----|------|----------------------------|-------|----------------|
| t0000091 | 20 | 4986 | TGAGGTAGTAGGTTGTATAG       | miRNA | hsa-let-7a-3   |
| t0000094 | 26 | 4800 | TTTGGCAATGGTAGAACTCACACTGG | miRNA | hsa-mir-182    |
| t0000096 | 22 | 4800 | GTACAGTACTGTGATAACTGAA     | miRNA | hsa-mir-101-2  |
| t0000097 | 20 | 4799 | TGAGGTAGTAGTTTGTGCTG       | miRNA | hsa-let-7i     |
| t0000100 | 20 | 4699 | TGAGGTAGTAGATTGTATAG       | miRNA | hsa-let-7f-2   |
| t0000101 | 22 | 4613 | TGTGCAAATCCATGCAAAACTG     | miRNA | hsa-mir-19b-2  |
| t0000102 | 22 | 4324 | TAGCTTATCAGACTGATGTTGA     | miRNA | hsa-mir-21     |
| t0000104 | 22 | 4277 | TCAGTGCCTACAGAACTTTGT      | miRNA | hsa-mir-148a   |
| t0000106 | 22 | 4263 | CTAGACTGAAGCTCCTTGAGGA     | miRNA | hsa-mir-151a   |
| t0000110 | 22 | 4147 | TGTAAACATCCTACACTCAGCT     | miRNA | hsa-mir-30b    |
| t0000111 | 24 | 4088 | TGTAAACATCCTACACTCTCAGCT   | miRNA | hsa-mir-30c-1  |
| t0000112 | 22 | 3919 | CAAAGAATTCTCCTTTTGGGCT     | miRNA | hsa-mir-186    |
| t0000116 | 20 | 3867 | AGCAGCATTGTACAGGGCTA       | miRNA | hsa-mir-107    |
| t0000118 | 26 | 3855 | AAACCGTTACCATTACTGAGTTTAGT | miRNA | hsa-mir-451a   |
| t0000121 | 19 | 3814 | TATTGCACTTGTCCCGGCC        | miRNA | hsa-mir-92a-2  |
| t0000123 | 21 | 3767 | AACATTC AACGCTGTCGGTGA     | miRNA | hsa-mir-181a-1 |
| t0000124 | 21 | 3726 | AGAGGTAGTAGTTGCATAGT       | miRNA | hsa-let-7d     |
| t0000126 | 19 | 3715 | CTGTA CTGAGCTGCCCCGA       | miRNA | hsa-mir-486    |
| t0000127 | 19 | 3661 | TGAGGTAGTAGATTGTATA        | miRNA | hsa-let-7f-2   |
| t0000128 | 19 | 3506 | CATTGCACTTGTCTCGGTC        | miRNA | hsa-mir-25     |
| t0000129 | 21 | 3455 | TAGCAGCACATAATGGTTTGT      | miRNA | hsa-mir-15a    |
| t0000130 | 22 | 3396 | ATCCTGTA CTGAGCTGCCCCGA    | miRNA | hsa-mir-486    |
| t0000132 | 18 | 3172 | AGCAGCATTGTACAGGGC         | miRNA | hsa-mir-107    |
| t0000133 | 25 | 3170 | TTTGGCAATGGTAGAACTCACACTG  | miRNA | hsa-mir-182    |
| t0000136 | 23 | 3139 | CAAAGTGCTGTTCTGTCAGGTAG    | miRNA | hsa-mir-93     |
| t0000142 | 18 | 3119 | TTTGGCAATGGTAGAACT         | miRNA | hsa-mir-182    |
| t0000143 | 18 | 3003 | TGAGGTAGTAGTTTGTGC         | miRNA | hsa-let-7i     |
| t0000145 | 20 | 2913 | TATTGCACTTGTCCCGGCCT       | miRNA | hsa-mir-92a-2  |
| t0000146 | 21 | 2912 | TTCAAGTAATCCAGGATAGGC      | miRNA | hsa-mir-26a-2  |
| t0000148 | 22 | 2893 | TAGCAGCACATCATGGTTTACA     | miRNA | hsa-mir-15b    |
| t0000150 | 24 | 2789 | AAACCGTTACCATTACTGAGTTTA   | miRNA | hsa-mir-451a   |
| t0000151 | 18 | 2711 | TCCTGTA CTGAGCTGCC         | miRNA | hsa-mir-486    |
| t0000152 | 21 | 2674 | CATGCCTTGAGTGTAGGACCG      | miRNA | hsa-mir-532    |
| t0000154 | 22 | 2648 | TGAGGTAGTAGGTTGTGTGGTT     | miRNA | hsa-let-7b     |
| t0000158 | 22 | 2616 | CAAAGTGCTGTTCTGTCAGGTA     | miRNA | hsa-mir-93     |
| t0000159 | 20 | 2540 | TACAGTACTGTGATAACTGA       | miRNA | hsa-mir-101-2  |
| t0000162 | 21 | 2512 | TGAGGTAGTAGGTTGTGTGGT      | miRNA | hsa-let-7b     |
| t0000164 | 21 | 2422 | TTCAAGTAATTCAGGATAGGT      | miRNA | hsa-mir-26b    |
| t0000165 | 19 | 2411 | GTACAGTACTGTGATAACT        | miRNA | hsa-mir-101-2  |
| t0000167 | 25 | 2346 | AAACCGTTACCATTACTGAGTTTAG  | miRNA | hsa-mir-451a   |
| t0000170 | 21 | 2342 | TAAAGTGCTTATAGTGCAGGT      | miRNA | hsa-mir-20a    |
| t0000171 | 20 | 2315 | CATGCCTTGAGTGTAGGACC       | miRNA | hsa-mir-532    |
| t0000172 | 20 | 2284 | GGATATCATCATATACTGTA       | miRNA | hsa-mir-144    |
| t0000173 | 21 | 2172 | CGGGGCAGCTCAGTACAGGAT      | miRNA | hsa-mir-486    |
| t0000176 | 20 | 2170 | TGACCTATGAATTGACAGCC       | miRNA | hsa-mir-192    |
| t0000177 | 22 | 2161 | TTCAAGTAATTCAGGATAGGTT     | miRNA | hsa-mir-26b    |
| t0000179 | 23 | 2037 | GTAAACATCCTTGACTGGAAGCT    | miRNA | hsa-mir-30e    |
| t0000180 | 21 | 1887 | CAAAGTGCTTACAGTGCAGGT      | miRNA | hsa-mir-17     |
| t0000181 | 22 | 1857 | AAAAGCTGGGTTGAGAGGGCGA     | miRNA | hsa-mir-320a   |
| t0000185 | 21 | 1845 | CAAAGAATTCTCCTTTTGGGC      | miRNA | hsa-mir-186    |
| t0000192 | 19 | 1830 | GGATATCATCATATACTGT        | miRNA | hsa-mir-144    |
| t0000195 | 20 | 1804 | CGGGGCAGCTCAGTACAGGA       | miRNA | hsa-mir-486    |
| t0000196 | 22 | 1787 | AGAGGTAGTAGGTTGCATAGTT     | miRNA | hsa-let-7d     |
| t0000197 | 21 | 1767 | CTAGACTGAAGCTCCTTGAGG      | miRNA | hsa-mir-151a   |
| t0000200 | 22 | 1748 | AACGGAATCCCAAAGCAGCTG      | miRNA | hsa-mir-191    |
| t0000202 | 20 | 1739 | TAAAGTGCTGACAGTGCAGA       | miRNA | hsa-mir-106b   |
| t0000203 | 21 | 1707 | TCGAGGAGCTCACAGTCTAGT      | miRNA | hsa-mir-151a   |
| t0000205 | 20 | 1594 | TTCACAGTGGCTAAGTTCTG       | miRNA | hsa-mir-27b    |

|          |    |                                |       |               |
|----------|----|--------------------------------|-------|---------------|
| t0000207 | 21 | 1540 CAACACCAGTCGATGGGCTGT     | miRNA | hsa-mir-21    |
| t0000209 | 21 | 1442 ATTGCACTTGTCCCGGCCTGT     | miRNA | hsa-mir-92a-2 |
| t0000220 | 22 | 1419 CAACGGAATCCCAAAAGCAGCT    | miRNA | hsa-mir-191   |
| t0000227 | 22 | 1351 CATGCCTTGAGTGTAGGACCGT    | miRNA | hsa-mir-532   |
| t0000235 | 19 | 1349 TGAGGTAGTAGTTTGTGCT       | miRNA | hsa-let-7i    |
| t0000239 | 22 | 1340 TGAGGTAGTAAGTTGTATTGTT    | miRNA | hsa-mir-98    |
| t0000246 | 23 | 1321 TGAGGTAGTAGATTGTATAGTTT   | miRNA | hsa-let-7f-2  |
| t0000247 | 20 | 1320 TTCAAGTAATTCAGGATAGG      | miRNA | hsa-mir-26b   |
| t0000248 | 20 | 1285 AATTGCACGGTATCCATCTG      | miRNA | hsa-mir-363   |
| t0000249 | 21 | 1259 TAGCTTATCAGACTGATGTTG     | miRNA | hsa-mir-21    |
| t0000250 | 22 | 1227 TGTGCAAATCTATGCAAAACTG    | miRNA | hsa-mir-19a   |
| t0000252 | 21 | 1198 TCAGGCTCAGTCCCCTCCCGA     | miRNA | hsa-mir-484   |
| t0000255 | 22 | 1187 GATATCATCATATACTGTAAGT    | miRNA | hsa-mir-144   |
| t0000260 | 22 | 1145 ACCACAGGGTAGAACCACGGAC    | miRNA | hsa-mir-140   |
| t0000265 | 20 | 1143 GTACAGTACTGTGATAACTG      | miRNA | hsa-mir-101-2 |
| t0000266 | 18 | 1104 TACAGTATAGATGATGTA        | miRNA | hsa-mir-144   |
| t0000271 | 23 | 1020 TACAGTACTGTGATAACTGAAGA   | miRNA | hsa-mir-101-2 |
| t0000273 | 19 | 1004 TTTGGCAATGGTAGAACTC       | miRNA | hsa-mir-182   |
| t0000280 | 23 | 981 TAGTGCAATATTGCTTATAGGGT    | miRNA | hsa-mir-454   |
| t0000293 | 22 | 977 ACTGGACTTGGAGTCAGAAGGC     | miRNA | hsa-mir-378a  |
| t0000299 | 23 | 922 ATCCTGTAAGTACTGAGCTGCCCGAG | miRNA | hsa-mir-486   |
| t0000305 | 20 | 918 TGTA AACATCCCGACTGGA       | miRNA | hsa-mir-30d   |
| t0000306 | 21 | 916 GGATATCATCATATACTGTAA      | miRNA | hsa-mir-144   |
| t0000315 | 21 | 862 AAAAGCTGGGTTGAGAGGGCG      | miRNA | hsa-mir-320a  |
| t0000318 | 21 | 844 ACCGCACTGTGGGTACTTGCT      | miRNA | hsa-mir-106b  |
| t0000320 | 21 | 829 TAAAGTGCTGACAGTGCAGAT      | miRNA | hsa-mir-106b  |
| t0000329 | 18 | 814 CATAAAGTAGAAAGCACT         | miRNA | hsa-mir-142   |
| t0000331 | 21 | 811 CTACAGTATAGATGATGTA        | miRNA | hsa-mir-144   |
| t0000335 | 20 | 712 TGAGGGGCAGAGAGCGAGAC       | miRNA | hsa-mir-423   |
| t0000336 | 22 | 670 AATGACACGATCACTCCCGTTG     | miRNA | hsa-mir-425   |
| t0000339 | 21 | 640 TCAGTGCCTACAGAACTTTG       | miRNA | hsa-mir-148a  |
| t0000365 | 20 | 638 ATTGCACTTGTCCCGGCCTG       | miRNA | hsa-mir-92a-2 |
| t0000373 | 22 | 636 TGTA AACATCCCGACTGGAAG     | miRNA | hsa-mir-30d   |
| t0000385 | 18 | 625 AAACCGTTACCATTACTG         | miRNA | hsa-mir-451a  |
| t0000387 | 19 | 620 TACAGTACTGTGATAACTG        | miRNA | hsa-mir-101-2 |
| t0000388 | 22 | 613 CAAAGTGCTTACAGTGCAGGTA     | miRNA | hsa-mir-17    |
| t0000393 | 23 | 607 TATTGCACTTGTCCCGGCCTGTG    | miRNA | hsa-mir-92a-2 |
| t0000395 | 21 | 594 ACTGGACTTGGAGTCAGAAGG      | miRNA | hsa-mir-378a  |
| t0000397 | 22 | 584 CTTATCAGATTGTATTGTAATT     | miRNA | hsa-mir-374a  |
| t0000400 | 22 | 583 TATGGCACTGGTAGAATCACT      | miRNA | hsa-mir-183   |
| t0000406 | 22 | 582 TAAAGTGCTTATAGTGCAGGTA     | miRNA | hsa-mir-20a   |
| t0000412 | 21 | 574 CCCATAAAGTAGAAAGCACTA      | miRNA | hsa-mir-142   |
| t0000413 | 23 | 569 TGACCTATGAATTGACAGCCAGT    | miRNA | hsa-mir-192   |
| t0000415 | 20 | 559 TGAGGTAGTAGTTTGTACAG       | miRNA | hsa-let-7g    |
| t0000418 | 19 | 545 AAACCGTTACCATTACTGA        | miRNA | hsa-mir-451a  |
| t0000422 | 21 | 543 CAGTGCAATGTTAAAAGGGCA      | miRNA | hsa-mir-130a  |
| t0000428 | 21 | 543 AATTGCACGGTATCCATCTGT      | miRNA | hsa-mir-363   |
| t0000433 | 22 | 542 ATTGCACTTGTCCCGGCCTGTT     | miRNA | hsa-mir-92a-1 |
| t0000435 | 20 | 539 TAGCTTATCAGACTGATGTT       | miRNA | hsa-mir-21    |
| t0000436 | 19 | 527 TACAGTATAGATGATGTAC        | miRNA | hsa-mir-144   |
| t0000438 | 23 | 524 AGCTCGGTCTGAGGCCCTCAGT     | miRNA | hsa-mir-423   |
| t0000441 | 21 | 509 TTATAAAGCAATGAGACTGAT      | miRNA | hsa-mir-340   |
| t0000448 | 20 | 501 CAGTGCAATGTTAAAAGGGC       | miRNA | hsa-mir-130a  |
| t0000452 | 22 | 499 TACTAGACTGAAGCTCCTTGAG     | miRNA | hsa-mir-151a  |
| t0000466 | 24 | 494 GGATATCATCATATACTGTAAGTT   | miRNA | hsa-mir-144   |
| t0000470 | 22 | 487 CACTAGATTGTGAGCTCCTGGA     | miRNA | hsa-mir-28    |
| t0000472 | 23 | 486 TAAAGTGCTTATAGTGCAGGTAG    | miRNA | hsa-mir-20a   |
| t0000477 | 23 | 485 TAGCAGCACGTAATATTGGCGT     | miRNA | hsa-mir-16-2  |

|          |    |                                 |       |                |
|----------|----|---------------------------------|-------|----------------|
| t0000482 | 22 | 459 TACCCATTGCATATCGGAGTTG      | miRNA | hsa-mir-660    |
| t0000483 | 19 | 452 CCAATATTACTGTGCTGCT         | miRNA | hsa-mir-16-2   |
| t0000484 | 22 | 450 TGTAACAGCAACTCCATGTGGA      | miRNA | hsa-mir-194-2  |
| t0000500 | 23 | 447 CAGTGCAATAGTATTGTCAAAGC     | miRNA | hsa-mir-301a   |
| t0000502 | 23 | 445 GATATCATCATATACTGTAAGTT     | miRNA | hsa-mir-144    |
| t0000504 | 24 | 441 CAAAGTGCTGTTTCGTGCAGGTAGT   | miRNA | hsa-mir-93     |
| t0000506 | 21 | 440 CCTGTACTGAGCTGCCCCGAG       | miRNA | hsa-mir-486    |
| t0000507 | 22 | 434 TACCACAGGGTAGAACCACGGA      | miRNA | hsa-mir-140    |
| t0000516 | 19 | 424 TGTACTGAGCTGCCCCGAG         | miRNA | hsa-mir-486    |
| t0000517 | 23 | 415 CAAAGTGCTTACAGTGCAGGTAG     | miRNA | hsa-mir-17     |
| t0000521 | 24 | 401 CAACGGAATCCCAAAGCAGCTGT     | miRNA | hsa-mir-191    |
| t0000530 | 20 | 397 AGCTACATTGTCTGCTGGGT        | miRNA | hsa-mir-221    |
| t0000536 | 23 | 389 TTGGCAATGGTAGAACTCACACT     | miRNA | hsa-mir-182    |
| t0000544 | 19 | 389 TGAGGTAGTAGTTTGTACA         | miRNA | hsa-let-7g     |
| t0000546 | 21 | 388 CAAAGTGCTCATAGTGCAGGT       | miRNA | hsa-mir-20b    |
| t0000555 | 22 | 384 TAGCAGCACATAATGGTTTGTG      | miRNA | hsa-mir-15a    |
| t0000557 | 23 | 379 AAAAGCTGGGTTGAGAGGGCGAA     | miRNA | hsa-mir-320a   |
| t0000558 | 20 | 376 TGAGGTAGTAGGTTGTGTGG        | miRNA | hsa-let-7b     |
| t0000563 | 21 | 369 TGAGGTAGTAAGTTGTATTGT       | miRNA | hsa-mir-98     |
| t0000569 | 20 | 368 CCAATATTACTGTGCTGCTT        | miRNA | hsa-mir-16-2   |
| t0000573 | 21 | 366 AGCTACATTGTCTGCTGGGTT       | miRNA | hsa-mir-221    |
| t0000581 | 19 | 356 TATTGCACTCGTCCCGGCC         | miRNA | hsa-mir-92b    |
| t0000584 | 20 | 356 CTAGACTGAAGCTCCTTGAG        | miRNA | hsa-mir-151a   |
| t0000587 | 19 | 353 CATTATTACTTTTGGTACG         | miRNA | hsa-mir-126    |
| t0000601 | 20 | 343 TAGCAGCACGTAATATTGG         | miRNA | hsa-mir-16-2   |
| t0000602 | 20 | 339 TTCAAGTAATCCAGGATAGG        | miRNA | hsa-mir-26a-2  |
| t0000606 | 21 | 337 TGTA AACATCCTACACTCAGC      | miRNA | hsa-mir-30b    |
| t0000620 | 21 | 334 GCCCTGACCTGTCCTGTTCTG       | miRNA | hsa-mir-4732   |
| t0000627 | 21 | 332 CAGTGCAATGATGAAAGGGCA       | miRNA | hsa-mir-130b   |
| t0000629 | 20 | 331 CATAAAGTAGAAAGCACTAC        | miRNA | hsa-mir-142    |
| t0000632 | 20 | 329 AAGCTGCCAGTTGAAGA ACT       | miRNA | hsa-mir-22     |
| t0000636 | 20 | 327 AAAAGCTGGGTTGAGAGGGC        | miRNA | hsa-mir-320b-2 |
| t0000637 | 23 | 326 TGTA AACATCCTACACTCTCAGC    | miRNA | hsa-mir-30c-1  |
| t0000640 | 19 | 326 AATGGCGCCACTAGGGTTG         | miRNA | hsa-mir-652    |
| t0000647 | 20 | 325 AGAGGTAGTAGGTTGCATAG        | miRNA | hsa-let-7d     |
| t0000649 | 22 | 324 ACCAATATTACTGTGCTGCTTT      | miRNA | hsa-mir-16-2   |
| t0000650 | 19 | 323 CGAATCATTATTTGCTGCT         | miRNA | hsa-mir-15b    |
| t0000651 | 23 | 315 TAGCTTATCAGACTGATGTTGAC     | miRNA | hsa-mir-21     |
| t0000652 | 27 | 309 TTTGGCAATGGTAGAACTCACACTGGT | miRNA | hsa-mir-182    |
| t0000653 | 20 | 306 TATTGCACTCGTCCCGGCC         | miRNA | hsa-mir-92b    |
| t0000663 | 18 | 297 TGAGGTAGTAGGTTGTAT          | miRNA | hsa-let-7c     |
| t0000670 | 23 | 295 TGAGGTAGTAGATTGTATAGTTG     | miRNA | hsa-let-7f-1   |
| t0000675 | 19 | 294 CCCATAAAGTAGAAAGCAC         | miRNA | hsa-mir-142    |
| t0000693 | 23 | 288 TGTGCAAATCCATGCAAACTGA      | miRNA | hsa-mir-19b-2  |
| t0000695 | 22 | 286 TTATAAAGCAATGAGACTGATT      | miRNA | hsa-mir-340    |
| t0000698 | 19 | 286 CATAAAGTAGAAAGCACTA         | miRNA | hsa-mir-142    |
| t0000703 | 21 | 280 TGACCTATGAATTGACAGCCA       | miRNA | hsa-mir-192    |
| t0000705 | 20 | 276 CTACAGTATAGATGATGTAC        | miRNA | hsa-mir-144    |
| t0000706 | 22 | 274 TCAAAGTGCTTACAGTGCAGGT      | miRNA | hsa-mir-17     |
| t0000713 | 21 | 274 ATCCTGTACTGAGCTGCCCCG       | miRNA | hsa-mir-486    |
| t0000719 | 20 | 268 TGAGGTAGTAAGTTGTATTG        | miRNA | hsa-mir-98     |
| t0000725 | 22 | 268 TCGTACCGTGAGTAATAATGCG      | miRNA | hsa-mir-126    |
| t0000726 | 24 | 266 TGAGGGGCAGAGAGCGAGACTTTT    | miRNA | hsa-mir-423    |
| t0000738 | 21 | 266 CACCAATATTACTGTGCTGCT       | miRNA | hsa-mir-16-2   |
| t0000739 | 24 | 265 AATGACACGATCACTCCCGTTGAG    | miRNA | hsa-mir-425    |
| t0000746 | 19 | 263 TTCAAGTAATCCAGGATAG         | miRNA | hsa-mir-26a-2  |
| t0000747 | 20 | 255 CAAAGTGCTGTTTCGTGCAGG       | miRNA | hsa-mir-93     |
| t0000750 | 18 | 252 TACAGTACTGTGATAACT          | miRNA | hsa-mir-101-2  |

|          |    |                              |       |                |
|----------|----|------------------------------|-------|----------------|
| t0000751 | 22 | 252 TCTCCCAACCCTTGTACCAGTG   | miRNA | hsa-mir-150    |
| t0000764 | 20 | 246 TGTA AACATCCTTGACTGGA    | miRNA | hsa-mir-30e    |
| t0000769 | 20 | 237 CTGACCTATGAATTGACAGC     | miRNA | hsa-mir-192    |
| t0000770 | 22 | 237 TCAGGCTCAGTCCCCTCCCGAT   | miRNA | hsa-mir-484    |
| t0000777 | 20 | 235 TAAAGTGCTTATAGTGCAGG     | miRNA | hsa-mir-20a    |
| t0000792 | 20 | 234 ATAAAGTAGAAAGCACTACT     | miRNA | hsa-mir-142    |
| t0000793 | 21 | 231 AAGGGCTTCTCTCTGCAGGA     | miRNA | hsa-mir-3158-2 |
| t0000795 | 20 | 230 CAAAGTGCTTACAGTGCAGG     | miRNA | hsa-mir-17     |
| t0000800 | 23 | 229 ACCACAGGGTAGAACCACGGACA  | miRNA | hsa-mir-140    |
| t0000809 | 21 | 220 TGTA AACATCCCCGACTGGAA   | miRNA | hsa-mir-30d    |
| t0000817 | 18 | 218 TGAGGTAGTAGATTGTAT       | miRNA | hsa-let-7f-2   |
| t0000820 | 22 | 215 AACATTCATTGCTGTCGGTGGG   | miRNA | hsa-mir-181b-2 |
| t0000843 | 21 | 215 ACCACAGGGTAGAACCACGGA    | miRNA | hsa-mir-140    |
| t0000851 | 23 | 214 TATGGCACTGGTAGAATTCAGT   | miRNA | hsa-mir-183    |
| t0000857 | 22 | 212 AACATTC AACCTGTCGGTGAGT  | miRNA | hsa-mir-181c   |
| t0000859 | 21 | 211 CGTACCGTGAGTAATAATGCG    | miRNA | hsa-mir-126    |
| t0000861 | 18 | 208 CTGTACTGAGCTGCCCCG       | miRNA | hsa-mir-486    |
| t0000869 | 23 | 207 TACCACAGGGTAGAACCACGGAC  | miRNA | hsa-mir-140    |
| t0000873 | 21 | 206 AGCAGCACGTAAATATTGGCG    | miRNA | hsa-mir-16-2   |
| t0000880 | 20 | 200 AACATTC AACGCTGTCGGTG    | miRNA | hsa-mir-181a-1 |
| t0000881 | 19 | 197 TTATGGTTTGCCTGGGACT      | miRNA | hsa-mir-584    |
| t0000884 | 20 | 191 TTCACAGTGGCTAAGTTCCG     | miRNA | hsa-mir-27a    |
| t0000906 | 21 | 191 TTGGCAATGGTAGAACTCACA    | miRNA | hsa-mir-182    |
| t0000922 | 20 | 190 CAACGGAATCCCAAAGCAG      | miRNA | hsa-mir-191    |
| t0000934 | 21 | 189 TCAAGTAATCCAGGATAGGCT    | miRNA | hsa-mir-26a-2  |
| t0000937 | 22 | 188 ATCAACAGACATTAATTGGGCG   | miRNA | hsa-mir-421    |
| t0000940 | 19 | 184 CTACAGTATAGATGATGTA      | miRNA | hsa-mir-144    |
| t0000942 | 23 | 179 TGAGGTAGTAGGTTGTATAGTTT  | miRNA | hsa-let-7a-3   |
| t0000946 | 22 | 177 CAAAGTGCTCATAGTGCAGGTA   | miRNA | hsa-mir-20b    |
| t0000959 | 21 | 177 TGTGCAAATCCATGCAAAACT    | miRNA | hsa-mir-19b-2  |
| t0000980 | 20 | 177 CTTTCAGTCGGATGTTTACA     | miRNA | hsa-mir-30e    |
| t0000990 | 23 | 175 TACTAGACTGAAGCTCCTTGAGG  | miRNA | hsa-mir-151a   |
| t0000993 | 22 | 175 TCTCACACAGAAATCGCACCCG   | miRNA | hsa-mir-342    |
| t0000994 | 21 | 170 ATATAATACAACCTGCTAAGT    | miRNA | hsa-mir-374b   |
| t0000999 | 21 | 169 AACATTC AACCTGTCGGTGAG   | miRNA | hsa-mir-181c   |
| t0001001 | 22 | 167 TAATGGTAATGGTTCTCTTGCT   | miRNA | hsa-mir-451a   |
| t0001020 | 21 | 166 AAAAGTGCTTACAGTGCAGGT    | miRNA | hsa-mir-106a   |
| t0001022 | 23 | 164 CCGCACTGTGGGTACTTGCTGCT  | miRNA | hsa-mir-106b   |
| t0001028 | 20 | 157 CCTGTACTGAGCTGCCCCGA     | miRNA | hsa-mir-486    |
| t0001031 | 20 | 156 TCGAGGAGCTCACAGTCTAG     | miRNA | hsa-mir-151b   |
| t0001043 | 23 | 150 TACCATTGCATATCGGAGTTGT   | miRNA | hsa-mir-660    |
| t0001074 | 19 | 149 TAGCTTATCAGACTGATGT      | miRNA | hsa-mir-21     |
| t0001078 | 22 | 147 TCGAGGAGCTCACAGTCTAGTA   | miRNA | hsa-mir-151a   |
| t0001101 | 21 | 147 TGTA AACATCCTACACTCTCA   | miRNA | hsa-mir-30c-1  |
| t0001102 | 19 | 144 CAAAACGTGAGGCGCTGCT      | miRNA | hsa-mir-424    |
| t0001108 | 23 | 144 CAAAGTGCTCATAGTGCAGGTAG  | miRNA | hsa-mir-20b    |
| t0001110 | 21 | 141 GATATCATCATATACTGTAAG    | miRNA | hsa-mir-144    |
| t0001132 | 22 | 140 TAGTGCAATATTGCTTATAGGG   | miRNA | hsa-mir-454    |
| t0001133 | 20 | 140 TATTGCACATTAAGTTG        | miRNA | hsa-mir-32     |
| t0001154 | 18 | 139 TGTA CTGAGCTGCCCCGA      | miRNA | hsa-mir-486    |
| t0001161 | 20 | 138 TATGGAAAGACTTTGCCACT     | miRNA | hsa-mir-3688-2 |
| t0001163 | 23 | 138 TGTGCAAATCTATGCAAACTGA   | miRNA | hsa-mir-19a    |
| t0001165 | 24 | 137 TAGTGCAATATTGCTTATAGGGTT | miRNA | hsa-mir-454    |
| t0001171 | 24 | 137 TAGCTTATCAGACTGATGTTGACT | miRNA | hsa-mir-21     |
| t0001176 | 22 | 136 TGACCTATGAATTGACAGCCAG   | miRNA | hsa-mir-192    |
| t0001178 | 19 | 134 ACCAATATTACTGTGCTGC      | miRNA | hsa-mir-16-2   |
| t0001181 | 18 | 134 GGATATCATCATATACTG       | miRNA | hsa-mir-144    |
| t0001185 | 21 | 133 CAACGGAATCCCAAAGCAGC     | miRNA | hsa-mir-191    |

|          |    |                              |       |                |
|----------|----|------------------------------|-------|----------------|
| t0001187 | 20 | 131 AAGCTCGGTCTGAGGCCCT      | miRNA | hsa-mir-423    |
| t0001191 | 20 | 131 ATGGTAATGGTTCTCTTGCT     | miRNA | hsa-mir-451a   |
| t0001199 | 18 | 130 ACCAATATTACTGTGCTG       | miRNA | hsa-mir-16-2   |
| t0001209 | 20 | 130 TAGCAGCACATCATGGTTTA     | miRNA | hsa-mir-15b    |
| t0001210 | 19 | 129 TAGCAGCACATCATGGTTT      | miRNA | hsa-mir-15b    |
| t0001215 | 22 | 128 AACCGTTACCATTACTGAGTTT   | miRNA | hsa-mir-451a   |
| t0001216 | 23 | 126 TGTAGTGTTTCCTACTTTATGGA  | miRNA | hsa-mir-142    |
| t0001218 | 21 | 125 TACCCTGTAGATCCGAATTTG    | miRNA | hsa-mir-10a    |
| t0001235 | 20 | 124 AACCGTTACCATTACTGAGT     | miRNA | hsa-mir-451a   |
| t0001244 | 21 | 123 ATGGCACTGGTAGAATTCCT     | miRNA | hsa-mir-183    |
| t0001257 | 22 | 122 AATTGCACGGTATCCATCTGTA   | miRNA | hsa-mir-363    |
| t0001259 | 21 | 122 AGCTCGGTCTGAGGCCCTCA     | miRNA | hsa-mir-423    |
| t0001269 | 21 | 121 GCTGACTCCTAGTCCAGGGCT    | miRNA | hsa-mir-345    |
| t0001270 | 23 | 121 TGTA AACATCCTTGACTGGAAGC | miRNA | hsa-mir-30e    |
| t0001273 | 23 | 120 TGTA AACATCCCCGACTGGAAGC | miRNA | hsa-mir-30d    |
| t0001281 | 22 | 119 ATGGCACTGGTAGAATTCCTG    | miRNA | hsa-mir-183    |
| t0001285 | 19 | 118 CCGCACTGTGGGTACTTGC      | miRNA | hsa-mir-106b   |
| t0001288 | 21 | 117 ATTGCACTTGCTCGGTCTGA     | miRNA | hsa-mir-25     |
| t0001295 | 20 | 116 CTGTGCGTGTGACAGCGGCT     | miRNA | hsa-mir-210    |
| t0001297 | 22 | 116 AGTGTTCCTACTTTATGGATG    | miRNA | hsa-mir-142    |
| t0001305 | 22 | 115 CGGGGCAGCTCAGTACAGGATA   | miRNA | hsa-mir-486    |
| t0001313 | 23 | 113 TCTCACACAGAAATCGACCCGT   | miRNA | hsa-mir-342    |
| t0001315 | 18 | 113 GTACAGTACTGTGATAAC       | miRNA | hsa-mir-101-2  |
| t0001326 | 21 | 111 TTATGGTTTGCCTGGGACTGA    | miRNA | hsa-mir-584    |
| t0001333 | 21 | 110 AACCGTTACCATTACTGAGTT    | miRNA | hsa-mir-451a   |
| t0001339 | 20 | 110 TATGGCACTGGTAGAATTC      | miRNA | hsa-mir-183    |
| t0001357 | 20 | 107 ACTGGACTTGGAGTCAGAAG     | miRNA | hsa-mir-378c   |
| t0001364 | 21 | 106 CTTATCAGATTGTATTGTAAT    | miRNA | hsa-mir-374a   |
| t0001365 | 22 | 102 AGCTCGGTCTGAGGCCCTCAG    | miRNA | hsa-mir-423    |
| t0001393 | 22 | 102 CAGTGCAATAGTATTGTCAAAG   | miRNA | hsa-mir-301a   |
| t0001404 | 19 | 100 TGTA AACATCCTACACTCT     | miRNA | hsa-mir-30c-1  |
| t0001440 | 20 | 98 TCAGGCTCAGTCCCCTCCC       | miRNA | hsa-mir-484    |
| t0001444 | 19 | 98 TGAGGGGCAGAGAGCGAGA       | miRNA | hsa-mir-423    |
| t0001468 | 22 | 97 ATGAGGTAGTAGATTGTATAGT    | miRNA | hsa-let-7f-2   |
| t0001491 | 24 | 96 CTGACCTATGAATTGACAGCCAGT  | miRNA | hsa-mir-192    |
| t0001493 | 19 | 96 TCACAGTGAACCGGTCTCT       | miRNA | hsa-mir-128-2  |
| t0001496 | 20 | 96 TCAGTGCCTACAGAACTTT       | miRNA | hsa-mir-148a   |
| t0001509 | 21 | 96 TTATAATACAACCTGATAAGT     | miRNA | hsa-mir-374a   |
| t0001515 | 20 | 95 CAGTGCAATGATGAAAGGGC      | miRNA | hsa-mir-130b   |
| t0001518 | 23 | 94 ATGCACCTGGGCAAGGATTCTGA   | miRNA | hsa-mir-500a   |
| t0001520 | 18 | 94 TAGCAGCACATCATGGTT        | miRNA | hsa-mir-15b    |
| t0001531 | 20 | 92 TCTCTCGGCTCCTCGCGGCT      | miRNA | hsa-mir-3615   |
| t0001536 | 23 | 91 TGAGAACTGAATCCATAGGCTG    | miRNA | hsa-mir-146b   |
| t0001539 | 23 | 89 TGTAGAGCAGGGAGCAGGAAGCT   | miRNA | hsa-mir-4732   |
| t0001561 | 22 | 89 CTGAGGTAGTAGTTTGTACAGT    | miRNA | hsa-let-7g     |
| t0001566 | 20 | 88 TTATGGTTTGCCTGGGACTG      | miRNA | hsa-mir-584    |
| t0001602 | 18 | 88 TCGAGGAGCTCACAGTCT        | miRNA | hsa-mir-151b   |
| t0001607 | 23 | 87 TGAGGTAGTAGTTTGTGCTGTTG   | miRNA | hsa-let-7i     |
| t0001617 | 19 | 86 AGAGGTAGTAGTTGCATA        | miRNA | hsa-let-7d     |
| t0001626 | 21 | 85 TGTA AACATCCTTGACTGGAA    | miRNA | hsa-mir-30e    |
| t0001647 | 19 | 85 TCAGTGCCTACAGAACTT        | miRNA | hsa-mir-148a   |
| t0001658 | 20 | 84 CTGCGCAAGCTACTGCCTTG      | miRNA | hsa-let-7i     |
| t0001677 | 21 | 84 CTGGACTTGGAGTCAGAAGGC     | miRNA | hsa-mir-378a   |
| t0001684 | 22 | 84 CGCATCCCCTAGGGCATTGGTG    | miRNA | hsa-mir-324    |
| t0001688 | 21 | 83 TCTCCAACCCTGTACCAGT       | miRNA | hsa-mir-150    |
| t0001693 | 18 | 82 TGAGGTAGTAAGTTGTAT        | miRNA | hsa-mir-98     |
| t0001699 | 20 | 81 CTATACGACCTGCTGCCTTT      | miRNA | hsa-let-7d     |
| t0001710 | 23 | 81 AACATTCATTGCTGTCGGTGGGT   | miRNA | hsa-mir-181b-2 |

|          |    |                                |       |                |
|----------|----|--------------------------------|-------|----------------|
| t0001728 | 21 | 80 AGCTGCCAGTTGAAGAACTGT       | miRNA | hsa-mir-22     |
| t0001735 | 20 | 79 ACTCGGCGTGGCGTCGGTCG        | miRNA | hsa-mir-1307   |
| t0001756 | 21 | 78 TGAGAACCACGTCTGCTCTGA       | miRNA | hsa-mir-589    |
| t0001769 | 21 | 78 TCTGGGCAACAAAGTGAGACC       | miRNA | hsa-mir-1285-2 |
| t0001784 | 20 | 77 GAGGTAGTAGATTGTATAGT        | miRNA | hsa-let-7f-2   |
| t0001792 | 21 | 77 TTTAGTAATGGTAATGGTTCT       | miRNA | hsa-mir-451a   |
| t0001803 | 21 | 76 CGAATCATTATTTGCTGCTCT       | miRNA | hsa-mir-15b    |
| t0001822 | 21 | 75 TACCGCACTGTGGGTACTTGC       | miRNA | hsa-mir-106b   |
| t0001829 | 19 | 74 TAAAGTGCTGACAGTGCAG         | miRNA | hsa-mir-106b   |
| t0001833 | 20 | 72 CAAAGAATTCTCCTTTTGGG        | miRNA | hsa-mir-186    |
| t0001848 | 20 | 72 TCGTACCGTGAGTAATAATG        | miRNA | hsa-mir-126    |
| t0001876 | 22 | 72 CTGTGCGTGTGACAGCGGCTGA      | miRNA | hsa-mir-210    |
| t0001916 | 24 | 72 TAAAGTGCTTATAGTGCAGGTAGT    | miRNA | hsa-mir-20a    |
| t0001917 | 21 | 71 ACTGCAGTGAAGGCACTTGTA       | miRNA | hsa-mir-17     |
| t0001922 | 22 | 70 TGTA AACATCCTTGACTGGAAG     | miRNA | hsa-mir-30e    |
| t0001925 | 18 | 70 TCAGTGC ACTACAGA AACT       | miRNA | hsa-mir-148a   |
| t0001946 | 23 | 70 TCAGTGC ACTACAGA AACTTTGT C | miRNA | hsa-mir-148a   |
| t0001956 | 22 | 69 GTAGTGTTCCTACTTTATGGA       | miRNA | hsa-mir-142    |
| t0001967 | 19 | 69 TTCAAGTAATTCAGGATAG         | miRNA | hsa-mir-26b    |
| t0001968 | 21 | 68 TGCGGGGCTAGGGCTAACAGC       | miRNA | hsa-mir-744    |
| t0001970 | 22 | 68 TGAGACCTCTGGGTTCTGAGCT      | miRNA | hsa-mir-769    |
| t0001976 | 24 | 66 CAAAGTGCTTACAGTGCAGGTAGT    | miRNA | hsa-mir-17     |
| t0002000 | 23 | 66 AATGACACGATCACTCCCGTTGA     | miRNA | hsa-mir-425    |
| t0002005 | 22 | 65 AAAAGTGCTTACAGTGCAGGTA      | miRNA | hsa-mir-106a   |
| t0002058 | 23 | 64 CATGCCTTGAGTGTAGGACCGTT     | miRNA | hsa-mir-532    |
| t0002061 | 21 | 63 ACTAGACTGAAGCTCCTTGAG       | miRNA | hsa-mir-151a   |
| t0002074 | 22 | 63 TGTCAGTTTGTCAAATACCCCA      | miRNA | hsa-mir-223    |
| t0002089 | 21 | 63 TACTAGACTGAAGCTCCTTGA       | miRNA | hsa-mir-151a   |
| t0002108 | 24 | 62 TACTAGACTGAAGCTCCTTGAGGA    | miRNA | hsa-mir-151a   |
| t0002110 | 19 | 61 CATGCCTTGAGTGTAGGAC         | miRNA | hsa-mir-532    |
| t0002119 | 21 | 61 TAGCAGCATCATGGTTTAC         | miRNA | hsa-mir-15b    |
| t0002157 | 22 | 60 CTGACCTATGAATTGACAGCCA      | miRNA | hsa-mir-192    |
| t0002163 | 23 | 60 AACGGAATCCCAAAGCAGCTGT      | miRNA | hsa-mir-191    |
| t0002175 | 22 | 60 TTATAATACAACCTGATAAGTG      | miRNA | hsa-mir-374a   |
| t0002193 | 22 | 60 TACCCTGTAGATCCGAATTTGT      | miRNA | hsa-mir-10a    |
| t0002194 | 20 | 60 TGAGATGAAGCACTGTAGCT        | miRNA | hsa-mir-143    |
| t0002200 | 23 | 59 CTGAGGTAGTAGTTTGTGCTGTT     | miRNA | hsa-let-7i     |
| t0002202 | 22 | 58 TCAGTGCATCACAGA AACTTTGT    | miRNA | hsa-mir-148b   |
| t0002213 | 18 | 58 TAGCTTATCAGACTGATG          | miRNA | hsa-mir-21     |
| t0002228 | 19 | 57 ATTGCACGGTATCCATCTG         | miRNA | hsa-mir-363    |
| t0002276 | 18 | 57 ATTGCACTTGTCCCGGCC          | miRNA | hsa-mir-92a-2  |
| t0002277 | 20 | 56 ACCACTGACCGTTGACTGTA        | miRNA | hsa-mir-181a-2 |
| t0002296 | 20 | 56 ATGCCTTGAGTGTAGGACCG        | miRNA | hsa-mir-532    |
| t0002302 | 18 | 56 GTTACCATTACTGAGTTT          | miRNA | hsa-mir-451a   |
| t0002314 | 22 | 56 TAAACATCCTTGACTGGAAGCT      | miRNA | hsa-mir-30e    |
| t0002332 | 21 | 55 ACTGTGCGTGTGACAGCGGCT       | miRNA | hsa-mir-210    |
| t0002335 | 23 | 55 AAGCTGCCAGTTGAAGAACTGTT     | miRNA | hsa-mir-22     |
| t0002338 | 24 | 55 AGCAGCATTGTACAGGGCTATGAA    | miRNA | hsa-mir-103a-1 |
| t0002342 | 18 | 55 GG TAGTAGATTGTATAGT         | miRNA | hsa-let-7f-2   |
| t0002351 | 24 | 55 AAAAGCTGGGTTGAGAGGGCGAAA    | miRNA | hsa-mir-320a   |
| t0002362 | 21 | 55 ATCAACAGACATTAATTGGGC       | miRNA | hsa-mir-421    |
| t0002366 | 24 | 54 AACATTCAACGCTGTCCGGTGAGTT   | miRNA | hsa-mir-181a-1 |
| t0002368 | 22 | 53 AAGGGCTTCTCTCTGCAGGAC       | miRNA | hsa-mir-3158-2 |
| t0002369 | 19 | 53 AACATTCAACGCTGTCCGT         | miRNA | hsa-mir-181a-1 |
| t0002382 | 22 | 53 AAAAGTACTTGCGGATTTTGCT      | miRNA | hsa-mir-548k   |
| t0002414 | 23 | 53 CCCATAAAGTAGAAAGCACTACT     | miRNA | hsa-mir-142    |
| t0002415 | 22 | 53 CCCATAAAGTAGAAAGCACTAC      | miRNA | hsa-mir-142    |
| t0002417 | 18 | 52 CATTGCACTTGTCTCGGT          | miRNA | hsa-mir-25     |

|          |    |                              |       |                |
|----------|----|------------------------------|-------|----------------|
| t0002423 | 22 | 52 ACATTCATTGCTGTCGGTGGGT    | miRNA | hsa-mir-181b-2 |
| t0002429 | 22 | 52 TTCACAGTGGCTAAGTTCTGCA    | miRNA | hsa-mir-27b    |
| t0002437 | 21 | 52 ACATTCAACGCTGTCGGTGAG     | miRNA | hsa-mir-181a-1 |
| t0002441 | 19 | 52 TATGGCACTGGTAGAATTC       | miRNA | hsa-mir-183    |
| t0002443 | 19 | 51 CCATAAAGTAGAAAGCACT       | miRNA | hsa-mir-142    |
| t0002444 | 21 | 51 CTGTGCGTGTGACAGCGGCTG     | miRNA | hsa-mir-210    |
| t0002449 | 19 | 50 TAGCAGCACGTAATATTG        | miRNA | hsa-mir-16-2   |
| t0002472 | 19 | 50 TCTGGGCAACAAAGTGAGA       | miRNA | hsa-mir-1285-2 |
| t0002490 | 22 | 49 ACTAGACTGAAGCTCCTTGAGG    | miRNA | hsa-mir-151a   |
| t0002504 | 23 | 49 CAGTGCAATGTAAAAGGGCATT    | miRNA | hsa-mir-130a   |
| t0002514 | 19 | 49 ACTGCAGTGAAGGCACTTG       | miRNA | hsa-mir-17     |
| t0002549 | 20 | 47 TGTA AACATCCTACACTCAG     | miRNA | hsa-mir-30b    |
| t0002563 | 20 | 46 AAAGTGCTGTTTCGTGCAGGT     | miRNA | hsa-mir-93     |
| t0002572 | 23 | 46 CTGAGGTAGTAGTTTGTACAGTT   | miRNA | hsa-let-7g     |
| t0002636 | 22 | 46 CACCAATATTACTGTGCTGCTT    | miRNA | hsa-mir-16-2   |
| t0002682 | 19 | 45 TTCACAGTGGCTAAGTTCC       | miRNA | hsa-mir-27a    |
| t0002686 | 21 | 45 TAGCACCATTTGAAATCGGTT     | miRNA | hsa-mir-29c    |
| t0002703 | 22 | 45 AAAGTGCTGTTTCGTGCAGGTAG   | miRNA | hsa-mir-93     |
| t0002744 | 23 | 45 GAACATTCAACGCTGTCGGTGAG   | miRNA | hsa-mir-181a-1 |
| t0002746 | 21 | 45 CTTTCAGTCGGATGTTTACAG     | miRNA | hsa-mir-30e    |
| t0002755 | 21 | 45 AACGGAATCCCAAAGCAGCT      | miRNA | hsa-mir-191    |
| t0002759 | 21 | 44 ATGCCTTGAGTGTAGGACCGT     | miRNA | hsa-mir-532    |
| t0002760 | 22 | 44 CAGTGCAATGTAAAAGGGCAT     | miRNA | hsa-mir-130a   |
| t0002765 | 23 | 44 TGAGGTAGTAGGTTGTGTGGTTT   | miRNA | hsa-let-7b     |
| t0002783 | 21 | 44 GAGGTAGTAGTTTGTGCTGTT     | miRNA | hsa-let-7i     |
| t0002789 | 21 | 44 AGGGGCTGGCTTTCCTCTGGT     | miRNA | hsa-mir-185    |
| t0002804 | 20 | 44 CATTATTACTTTTGGTACGC      | miRNA | hsa-mir-126    |
| t0002806 | 22 | 43 TGTA AACATCCTACACTCTCAG   | miRNA | hsa-mir-30c-1  |
| t0002821 | 22 | 43 ATATAATACAACCTGCTAAGTG    | miRNA | hsa-mir-374b   |
| t0002832 | 20 | 43 CAAAGTGCTCATAGTGCAGG      | miRNA | hsa-mir-20b    |
| t0002860 | 18 | 42 TGAGGTAGTAGTTTGTAC        | miRNA | hsa-let-7g     |
| t0002867 | 20 | 42 ATTATTACTTTTGGTACGCG      | miRNA | hsa-mir-126    |
| t0002892 | 18 | 42 CTACAGTATAGATGATGT        | miRNA | hsa-mir-144    |
| t0002935 | 21 | 42 CCGCACTGTGGGTA CTTGCTG    | miRNA | hsa-mir-106b   |
| t0002951 | 23 | 42 TAGGTAGTTTCTGTTGTTGGGA    | miRNA | hsa-mir-196b   |
| t0002963 | 22 | 42 TAAAGTGCTGACAGTGCAGATA    | miRNA | hsa-mir-106b   |
| t0002965 | 23 | 41 CTAGCAGCACGTAATATTGGCG    | miRNA | hsa-mir-16-2   |
| t0002970 | 20 | 41 AATGGCGCCACTAGGGTTGT      | miRNA | hsa-mir-652    |
| t0002972 | 19 | 41 TAGCAGCACATAATGGTTT       | miRNA | hsa-mir-15a    |
| t0002976 | 21 | 41 GAGGTAGTAGATTGTATAGTT     | miRNA | hsa-let-7f-2   |
| t0002980 | 21 | 41 TTTGGCACTAGCACATTTTTG     | miRNA | hsa-mir-96     |
| t0002997 | 20 | 41 TTGCACTTGTCCCGCCTGT       | miRNA | hsa-mir-92a-2  |
| t0003003 | 23 | 40 ACTGCTGAGCTAGCACTCCCGA    | miRNA | hsa-mir-93     |
| t0003015 | 21 | 40 AATGGCGCCACTAGGGTTGTG     | miRNA | hsa-mir-652    |
| t0003027 | 18 | 39 AATTGCACGGTATCCATC        | miRNA | hsa-mir-363    |
| t0003044 | 20 | 39 TCACAGTGAACCGGTCTCTT      | miRNA | hsa-mir-128-2  |
| t0003058 | 25 | 39 TTGGCAATGGTAGAACTCACACTGG | miRNA | hsa-mir-182    |
| t0003080 | 22 | 39 CCTCCCACACCCAAGGCTTGCA    | miRNA | hsa-mir-532    |
| t0003082 | 24 | 38 GAAGTTCTGTTATACACTCAGGCT  | miRNA | hsa-mir-148b   |
| t0003108 | 22 | 38 CTTTCAGTCGGATGTTTACAGC    | miRNA | hsa-mir-30e    |
| t0003130 | 22 | 38 CTCGGGGCAGCTCAGTACAGGA    | miRNA | hsa-mir-486    |
| t0003142 | 23 | 38 TACCCTGTAGATCCGAATTTGTG   | miRNA | hsa-mir-10a    |
| t0003168 | 19 | 37 ATTGCACTTGTCTCGGTCT       | miRNA | hsa-mir-25     |
| t0003171 | 18 | 37 AGCACGTAAATATTGGCG        | miRNA | hsa-mir-16-2   |
| t0003177 | 22 | 37 CACCTTGCCTACTCAGGTCTG     | miRNA | hsa-mir-3200   |
| t0003199 | 21 | 37 AAAGAATTCTCCTTTTGGGCT     | miRNA | hsa-mir-186    |
| t0003209 | 21 | 37 TGTCTTACTCCCTCAGGCACA     | miRNA | hsa-mir-550a-3 |
| t0003219 | 19 | 37 TGACCTATGAATTGACAGC       | miRNA | hsa-mir-192    |



|          |    |                                  |       |                |
|----------|----|----------------------------------|-------|----------------|
| t0003220 | 22 | 36 GAACATTCAACGCTGTCCGGTGA       | miRNA | hsa-mir-181a-1 |
| t0003237 | 21 | 36 CCAATATTACTGTGCTGCTTT         | miRNA | hsa-mir-16-2   |
| t0003241 | 24 | 36 AAGCTCGGTCTGAGGCCCTCAGT       | miRNA | hsa-mir-423    |
| t0003278 | 24 | 36 TGTA AACATCCTCGACTGGAAGCT     | miRNA | hsa-mir-30a    |
| t0003285 | 22 | 36 ACATTCAACGCTGTCCGGTGA         | miRNA | hsa-mir-181a-1 |
| t0003293 | 18 | 36 TATTGCACTTGTCCCGGC            | miRNA | hsa-mir-92a-2  |
| t0003302 | 21 | 36 TATTGCACTCGTCCCGGCCTC         | miRNA | hsa-mir-92b    |
| t0003303 | 21 | 36 TCAAAGTGCTTACAGTGCAGG         | miRNA | hsa-mir-17     |
| t0003304 | 22 | 36 TACCCTGTAGAACCGAATTTGT        | miRNA | hsa-mir-10b    |
| t0003319 | 21 | 35 TGTGCAAATCTATGCAAAACT         | miRNA | hsa-mir-19a    |
| t0003322 | 21 | 35 TGAGGTAGTAGGTTGTATGGT         | miRNA | hsa-let-7c     |
| t0003341 | 20 | 35 TGTGCAAATCCATGCAAAAC          | miRNA | hsa-mir-19b-2  |
| t0003373 | 20 | 35 CGAATCATTATTTGCTGCTC          | miRNA | hsa-mir-15b    |
| t0003380 | 21 | 35 ACTCGGCGTGCCGTCGGTCGT         | miRNA | hsa-mir-1307   |
| t0003396 | 23 | 35 TGAGGTAGTAGTTTGTACAGTTT       | miRNA | hsa-let-7g     |
| t0003397 | 20 | 35 TCTCCCAACCCTTGTACCAG          | miRNA | hsa-mir-150    |
| t0003405 | 22 | 35 TGATATGTTTGATATATTAGGT        | miRNA | hsa-mir-190a   |
| t0003418 | 32 | 35 TTTGGCAATGGTAGAACTCACACTGGTGA | miRNA | hsa-mir-182    |
| t0003419 | 21 | 34 CTCGGCGTGGCGTCGGTTCGTG        | miRNA | hsa-mir-1307   |
| t0003433 | 21 | 34 TGAGATGAAGCACTGTAGCTC         | miRNA | hsa-mir-143    |
| t0003437 | 19 | 34 GGTAGTAGATTGTATAGTT           | miRNA | hsa-let-7f-2   |
| t0003475 | 21 | 34 CACTAGATTGTGAGCTCCTGG         | miRNA | hsa-mir-28     |
| t0003481 | 21 | 34 TGGCTCAGTTCAGCAGGAACA         | miRNA | hsa-mir-24-2   |
| t0003506 | 20 | 33 TAGCACCATTTGAAATCGGT          | miRNA | hsa-mir-29c    |
| t0003530 | 19 | 33 CTAGACTGAAGCTCCTTGA           | miRNA | hsa-mir-151a   |
| t0003546 | 21 | 33 TACGTCATCGTTGTCATCGTC         | miRNA | hsa-mir-598    |
| t0003590 | 21 | 32 AATGACACGATCACTCCCGTT         | miRNA | hsa-mir-425    |
| t0003617 | 19 | 32 ATTGCACTTGTCCCGGCCT           | miRNA | hsa-mir-92a-2  |
| t0003634 | 21 | 32 TCACAGTGAACCGGTCTCTTT         | miRNA | hsa-mir-128-2  |
| t0003645 | 20 | 32 ATTGACGGTATCCATCTGT           | miRNA | hsa-mir-363    |
| t0003662 | 23 | 32 TCAAAGTGCTTACAGTGCAGGTA       | miRNA | hsa-mir-17     |
| t0003664 | 19 | 32 CAATGGTAGAACTCACACT           | miRNA | hsa-mir-182    |
| t0003676 | 24 | 32 TACCACAGGGTAGAACCACGGACA      | miRNA | hsa-mir-140    |
| t0003719 | 18 | 31 CGAATCATTATTTGCTGC            | miRNA | hsa-mir-15b    |
| t0003722 | 19 | 31 GGTAGTAGTTGTATAGTT            | miRNA | hsa-let-7a-3   |
| t0003739 | 21 | 31 CTGTACTGAGCTGCCCGAGG          | miRNA | hsa-mir-486    |
| t0003757 | 21 | 31 CTATACGACCTGCTGCCTTTC         | miRNA | hsa-let-7d     |
| t0003783 | 20 | 31 AAAAGTGCTTACAGTGCAGG          | miRNA | hsa-mir-106a   |
| t0003795 | 22 | 30 TGCGGGGCTAGGGCTAACAGCA        | miRNA | hsa-mir-744    |
| t0003800 | 18 | 30 TAGCAGCACATAATGGTT            | miRNA | hsa-mir-15a    |
| t0003821 | 18 | 30 TTCAAGTAATTCAGGATA            | miRNA | hsa-mir-26b    |
| t0003893 | 24 | 30 TAGCAGCACGTAATATTGGCGTT       | miRNA | hsa-mir-16-1   |
| t0003912 | 20 | 30 TGTA AACATCCTACACTCTC         | miRNA | hsa-mir-30c-1  |
| t0003926 | 21 | 29 TGTAACAGCAACTCCATGTGG         | miRNA | hsa-mir-194-2  |
| t0003938 | 18 | 29 GCAATGGTAGAACTCACA            | miRNA | hsa-mir-182    |
| t0003950 | 22 | 29 AAAAAAAAAAAGCCCAACCCT         | miRNA | hsa-mir-3613   |
| t0003970 | 21 | 29 TAAGGTGCATCTAGTGCAGAT         | miRNA | hsa-mir-18a    |
| t0003998 | 20 | 29 TAAGGTGCATCTAGTGCAGA          | miRNA | hsa-mir-18a    |
| t0004004 | 20 | 29 TCAAGTAATCCAGGATAGGC          | miRNA | hsa-mir-26a-2  |
| t0004011 | 22 | 29 TCTGTGAGACCAAAGAACTACT        | miRNA | hsa-mir-4677   |
| t0004050 | 23 | 28 ATGGCACTGGTAGAATTCAGTGT       | miRNA | hsa-mir-183    |
| t0004067 | 24 | 28 TAGCAGCACGTAATATTGGCGTA       | miRNA | hsa-mir-16-2   |
| t0004091 | 20 | 28 ATTCTAATTTCTCCACGTCT          | miRNA | hsa-mir-576    |
| t0004112 | 23 | 28 AACATTCAACCTGTCCGGTGA         | miRNA | hsa-mir-181c   |
| t0004119 | 21 | 28 CTATACAATCTACTGTCTTTC         | miRNA | hsa-let-7a-3   |
| t0004121 | 23 | 28 TTTGGCACTAGCACATTTTGTCT       | miRNA | hsa-mir-96     |
| t0004135 | 21 | 28 TATGGCACTGGTAGAATTCAC         | miRNA | hsa-mir-183    |
| t0004137 | 21 | 28 ACAGTACTGTGATAACTGAAG         | miRNA | hsa-mir-101-2  |

|          |    |                             |       |                |
|----------|----|-----------------------------|-------|----------------|
| t0004169 | 22 | 27 GTGAGGTAGTAGGTTGTATAGT   | miRNA | hsa-let-7a-3   |
| t0004173 | 18 | 27 GTAGTAGTTTGTGCTGTT       | miRNA | hsa-let-7i     |
| t0004211 | 22 | 27 GAAAAGCTGGGTTGAGAGGGCG   | miRNA | hsa-mir-320a   |
| t0004218 | 20 | 27 TACCTGTAGATCCGAATTT      | miRNA | hsa-mir-10a    |
| t0004225 | 21 | 27 ACATTCATTGCTGTCGGTGGG    | miRNA | hsa-mir-181b-2 |
| t0004231 | 22 | 27 TGAGAACTGAATCCATGGGT     | miRNA | hsa-mir-146a   |
| t0004277 | 21 | 27 GAGGTAGTAGGTTGTATAGTT    | miRNA | hsa-let-7a-3   |
| t0004291 | 20 | 27 CAGAGTCTCGTTCTGTTGCC     | miRNA | hsa-mir-1273c  |
| t0004294 | 20 | 27 AATGACACGATCACTCCCGT     | miRNA | hsa-mir-425    |
| t0004318 | 23 | 26 ATGAGGTAGTAGATTGTATAGTT  | miRNA | hsa-let-7f-2   |
| t0004340 | 24 | 26 TGAGAACTGAATCCATAGGCTGT  | miRNA | hsa-mir-146b   |
| t0004355 | 22 | 26 CATAAAGTAGAAAGCACTACTA   | miRNA | hsa-mir-142    |
| t0004366 | 23 | 26 AATTGCACGGTATCCATCTGTAA  | miRNA | hsa-mir-363    |
| t0004380 | 19 | 26 AAGCTGCCAGTTGAAGAAC      | miRNA | hsa-mir-22     |
| t0004388 | 23 | 26 ATGACACGATCACTCCCGTTGAG  | miRNA | hsa-mir-425    |
| t0004400 | 22 | 26 TGAGAACTGAATCCATAGGCT    | miRNA | hsa-mir-146b   |
| t0004413 | 21 | 26 CCACTGCCCCAGGTGCTGCTG    | miRNA | hsa-mir-324    |
| t0004421 | 18 | 26 AATGGTAGAACTCACACT       | miRNA | hsa-mir-182    |
| t0004424 | 21 | 26 TAATGGTAATGGTTCTCTTGC    | miRNA | hsa-mir-451a   |
| t0004446 | 22 | 25 ACCCTGTAGATCCGAATTTGTG   | miRNA | hsa-mir-10a    |
| t0004449 | 18 | 25 GCACTTGTCCCGCCTGT        | miRNA | hsa-mir-92a-2  |
| t0004491 | 19 | 25 GTGCATTGCTGTTGCATTG      | miRNA | hsa-mir-33b    |
| t0004547 | 23 | 25 TTCAAGTAATCCAGGATAGGCTG  | miRNA | hsa-mir-26a-2  |
| t0004560 | 19 | 25 CGTTACCATTACTGAGTTT      | miRNA | hsa-mir-451a   |
| t0004571 | 20 | 25 TCTTCTCTGTTTTGGCCATG     | miRNA | hsa-mir-942    |
| t0004578 | 20 | 25 CTATAACAACCTACTGCCTTC    | miRNA | hsa-let-7b     |
| t0004588 | 22 | 25 AGCTACATTGTCTGCTGGGTTT   | miRNA | hsa-mir-221    |
| t0004589 | 20 | 25 GAGGTAGTAGGTTGTATAGT     | miRNA | hsa-let-7a-3   |
| t0004621 | 20 | 24 ACCCTGTAGATCCGAATTTG     | miRNA | hsa-mir-10a    |
| t0004638 | 18 | 24 GACTGTGATAACTGAAG        | miRNA | hsa-mir-101-2  |
| t0004644 | 19 | 24 GGTAGTAGTTTGTGCTGTT      | miRNA | hsa-let-7i     |
| t0004695 | 20 | 24 CACCCGGCTGTGTGCACATG     | miRNA | hsa-mir-941-4  |
| t0004737 | 19 | 24 GATATCATCATATACTGTA      | miRNA | hsa-mir-144    |
| t0004780 | 20 | 24 TCTGGGCAACAAAGTGAGAC     | miRNA | hsa-mir-1285-2 |
| t0004785 | 22 | 24 TCTCTCGGCTCCTCGCGGCTCG   | miRNA | hsa-mir-3615   |
| t0004790 | 20 | 24 AAAGCTGGGTTGAGAGGGCG     | miRNA | hsa-mir-320a   |
| t0004817 | 21 | 23 TTGCACTTGTCCCGCCTGTT     | miRNA | hsa-mir-92a-1  |
| t0004825 | 20 | 23 GCCCTGACCTGTCCTGTTCT     | miRNA | hsa-mir-4732   |
| t0004855 | 18 | 23 GCACTTGTCTCGGTCTGA       | miRNA | hsa-mir-25     |
| t0004866 | 20 | 23 AACCCGTAGATCCGAACCTG     | miRNA | hsa-mir-100    |
| t0004889 | 18 | 23 AACATTCAACGCTGTCGG       | miRNA | hsa-mir-181a-1 |
| t0004891 | 20 | 23 AGCTCGGTCTGAGGCCCTC      | miRNA | hsa-mir-423    |
| t0004896 | 23 | 23 GAAGTTCTGTTATACACTCAGGC  | miRNA | hsa-mir-148b   |
| t0004912 | 20 | 23 TTATAAAGCAATGAGACTGA     | miRNA | hsa-mir-340    |
| t0004922 | 24 | 23 TTCAAGTAATCCAGGATAGGCTGT | miRNA | hsa-mir-26a-2  |
| t0004930 | 22 | 23 CTATACGACCTGCTGCCTTTCT   | miRNA | hsa-let-7d     |
| t0004932 | 18 | 23 GGTAGTAGGTTGTATAGT       | miRNA | hsa-let-7a-3   |
| t0004960 | 22 | 23 TGAGGTAGTAGGTTGTATGGTT   | miRNA | hsa-let-7c     |
| t0005015 | 20 | 23 TCTCCCTCCTGCCCTGGCT      | miRNA | hsa-mir-4685   |
| t0005016 | 22 | 22 ACTGCCCTAAGTGCTCCTTCTG   | miRNA | hsa-mir-18a    |
| t0005046 | 20 | 22 ATATAATACAACCTGCTAAG     | miRNA | hsa-mir-374b   |
| t0005053 | 20 | 22 AGCTGCCAGTTGAAGAACTG     | miRNA | hsa-mir-22     |
| t0005060 | 21 | 22 ACCCTATCAATATTGTCTCTG    | miRNA | hsa-mir-454    |
| t0005106 | 23 | 22 CTCGTACCGTGAGTAATAATGCG  | miRNA | hsa-mir-126    |
| t0005141 | 20 | 22 GAGGGGCAGAGAGCGAGACT     | miRNA | hsa-mir-423    |
| t0005190 | 20 | 22 TAACGCATAATATGGACATG     | miRNA | hsa-mir-3912   |
| t0005197 | 21 | 22 CCTGTTCTCCATTACTTGGCT    | miRNA | hsa-mir-26b    |
| t0005221 | 21 | 22 AAAAGCTGGGTTGAGAGGGCA    | miRNA | hsa-mir-320b-2 |

|          |    |                             |       |                |
|----------|----|-----------------------------|-------|----------------|
| t0005227 | 18 | 21 GCAGCATTGTACAGGGCT       | miRNA | hsa-mir-107    |
| t0005254 | 23 | 21 TAAGGTGCATCTAGTGCAGATAG  | miRNA | hsa-mir-18a    |
| t0005261 | 19 | 21 TGTA AACATCCTTGACTGG     | miRNA | hsa-mir-30e    |
| t0005316 | 22 | 21 ACTGCTGAGCTAGCACTTCCCG   | miRNA | hsa-mir-93     |
| t0005388 | 20 | 21 CAACACCAGTCGATGGGCTG     | miRNA | hsa-mir-21     |
| t0005392 | 22 | 21 ATTGCACTTGTCGGCCTGTG     | miRNA | hsa-mir-92a-2  |
| t0005403 | 19 | 21 TTCACAGTGGCTAAGTTCT      | miRNA | hsa-mir-27b    |
| t0005436 | 24 | 21 TTGGCAATGGTAGAACTCACACTG | miRNA | hsa-mir-182    |
| t0005478 | 22 | 20 TATTGCACTCGTCCCGGCCTCC   | miRNA | hsa-mir-92b    |
| t0005505 | 19 | 20 CTTATCAGATTGTATTGTA      | miRNA | hsa-mir-374a   |
| t0005519 | 24 | 20 TCTCACACAGAAATCGCACCCGTC | miRNA | hsa-mir-342    |
| t0005522 | 23 | 20 GAAAAGCTGGGTTGAGAGGGCGA  | miRNA | hsa-mir-320a   |
| t0005530 | 22 | 20 TGGCAATGGTAGAACTCACACT   | miRNA | hsa-mir-182    |
| t0005597 | 22 | 20 CTCGAGGAGCTCACAGTCTAGT   | miRNA | hsa-mir-151a   |
| t0005629 | 22 | 20 GTAGAGGAGATGGCGCAGGGGA   | miRNA | hsa-mir-877    |
| t0005632 | 18 | 20 TATGGCACTGGTAGAATT       | miRNA | hsa-mir-183    |
| t0005652 | 21 | 20 ATTGCACTGGTAGAATT        | miRNA | hsa-mir-363    |
| t0005695 | 20 | 19 ATTATGGTTTGCCTGGGACT     | miRNA | hsa-mir-584    |
| t0005702 | 24 | 19 TATGGCACTGGTAGAATTCAGTGT | miRNA | hsa-mir-183    |
| t0005724 | 20 | 19 TGGCAATGGTAGAACTCACA     | miRNA | hsa-mir-182    |
| t0005780 | 20 | 19 CCACTGCCCCAGGTGCTGCT     | miRNA | hsa-mir-324    |
| t0005782 | 22 | 19 GTAAACATCCTTGACTGGAAGC   | miRNA | hsa-mir-30e    |
| t0005787 | 22 | 19 TGTAGTGTTCCTACTTTATGG    | miRNA | hsa-mir-142    |
| t0005798 | 23 | 19 CAAAGAATTCTCCTTTTGGGCTT  | miRNA | hsa-mir-186    |
| t0005841 | 18 | 19 CCGTTACCATTACTGAGT       | miRNA | hsa-mir-451a   |
| t0005843 | 18 | 19 CCCATAAAGTAGAAAGCA       | miRNA | hsa-mir-142    |
| t0005886 | 24 | 19 TGATATGTTTGATATATTAGGTTG | miRNA | hsa-mir-190a   |
| t0005899 | 21 | 19 TGAGGTAGGAGGTTGTATAGT    | miRNA | hsa-let-7e     |
| t0005915 | 19 | 19 CTATACGACCTGCTGCCTT      | miRNA | hsa-let-7d     |
| t0005927 | 21 | 19 TTTGGGACTGATCTTGATGTC    | miRNA | hsa-mir-3913-2 |
| t0005935 | 22 | 19 AAAGTTCTGAGACACTCCGACT   | miRNA | hsa-mir-148a   |
| t0006013 | 22 | 19 TCTGGGCAACAAAGTGAGACCT   | miRNA | hsa-mir-1285-2 |
| t0006018 | 22 | 18 CACGCTCATGCACACACCCACA   | miRNA | hsa-mir-574    |
| t0006024 | 23 | 18 TAAAGTGCTGACAGTGCAGATAG  | miRNA | hsa-mir-106b   |
| t0006049 | 19 | 18 ATGCCTTGAGTGTAGGACC      | miRNA | hsa-mir-532    |
| t0006058 | 21 | 18 CACCTTGCCTACTCAGGTCT     | miRNA | hsa-mir-3200   |
| t0006173 | 20 | 18 GCTGACTCCTAGTCCAGGGC     | miRNA | hsa-mir-345    |
| t0006188 | 21 | 18 AATGCACCTGGGCAAGGATTC    | miRNA | hsa-mir-502    |
| t0006243 | 19 | 18 CTTTCAGTCGGATGTTTAC      | miRNA | hsa-mir-30e    |
| t0006265 | 19 | 18 TCTGTGAGACCAAAGAACT      | miRNA | hsa-mir-4677   |
| t0006273 | 21 | 18 AAAGCTGGGTTGAGAGGGCGA    | miRNA | hsa-mir-320a   |
| t0006282 | 20 | 18 GCAGCACGTAATATTGGCG      | miRNA | hsa-mir-16-2   |
| t0006287 | 21 | 18 CAGCATTGTACAGGGCTATGA    | miRNA | hsa-mir-103a-1 |
| t0006309 | 23 | 18 ACCAATATTACTGTGCTGCTTTA  | miRNA | hsa-mir-16-2   |
| t0006313 | 22 | 17 CCAATATTACTGTGCTGCTTTA   | miRNA | hsa-mir-16-2   |
| t0006321 | 21 | 17 GAAAAGCTGGGTTGAGAGGGC    | miRNA | hsa-mir-320b-2 |
| t0006341 | 19 | 17 AAGTAATCCAGGATAGGCT      | miRNA | hsa-mir-26a-2  |
| t0006395 | 20 | 17 GATATCATCATATACTGTAA     | miRNA | hsa-mir-144    |
| t0006416 | 19 | 17 CGGGGCAGCTCAGTACAGG      | miRNA | hsa-mir-486    |
| t0006444 | 22 | 17 TAGCACCATTTGAAATCGGTTA   | miRNA | hsa-mir-29c    |
| t0006490 | 18 | 17 CGTTACCATTACTGAGTT       | miRNA | hsa-mir-451a   |
| t0006505 | 20 | 17 TATCATCATATACTGTAAGT     | miRNA | hsa-mir-144    |
| t0006526 | 19 | 17 TTGGCAATGGTAGAACTCA      | miRNA | hsa-mir-182    |
| t0006564 | 23 | 17 GCCCTGACCTGTCTGTTCTGCC   | miRNA | hsa-mir-4732   |
| t0006586 | 21 | 17 CCACAGGGTAGAACCACGGAC    | miRNA | hsa-mir-140    |
| t0006598 | 23 | 17 ACTAGACTGAAGCTCCTTGAGGA  | miRNA | hsa-mir-151a   |
| t0006624 | 21 | 17 CTATACAACCTACTGCCTTCC    | miRNA | hsa-let-7b     |
| t0006631 | 21 | 17 TAGCACCATCTGAAATCGGTT    | miRNA | hsa-mir-29a    |

|          |    |                                |       |                |
|----------|----|--------------------------------|-------|----------------|
| t0006635 | 18 | 16 TATTGCACTCGTCCCGGC          | miRNA | hsa-mir-92b    |
| t0006689 | 24 | 16 TAGCAGCACATAATGGTTTGTGGA    | miRNA | hsa-mir-15a    |
| t0006698 | 21 | 16 TGAGAACTGAATCCATGGGT        | miRNA | hsa-mir-146a   |
| t0006740 | 21 | 16 CGGGGCCGTAGCACTGTCTGA       | miRNA | hsa-mir-128-1  |
| t0006766 | 19 | 16 AAAGCTGGGTTGAGAGGGC         | miRNA | hsa-mir-320b-2 |
| t0006774 | 22 | 16 AAGCTCGGTCTGAGGCCCTCA       | miRNA | hsa-mir-423    |
| t0006802 | 22 | 16 TCTTCTCTGTTTTGGCCATGTG      | miRNA | hsa-mir-942    |
| t0006811 | 24 | 16 TAAAGTGCTGACAGTGCAGATAGT    | miRNA | hsa-mir-106b   |
| t0006828 | 21 | 16 TCGGGGCAGCTCAGTACAGGA       | miRNA | hsa-mir-486    |
| t0006845 | 21 | 16 GGCAATGGTAGAACTCACACT       | miRNA | hsa-mir-182    |
| t0006919 | 24 | 16 GATATCATCATATACTGTAAGTTT    | miRNA | hsa-mir-144    |
| t0006934 | 21 | 16 TGAGCGCCTCGACGACAGAGC       | miRNA | hsa-mir-339    |
| t0006955 | 21 | 16 TACCACAGGGTAGAACCACGG       | miRNA | hsa-mir-140    |
| t0006993 | 20 | 16 CTTATCAGATTGTATTGTAA        | miRNA | hsa-mir-374a   |
| t0007038 | 18 | 15 TACCGCACTGTGGGACT           | miRNA | hsa-mir-106b   |
| t0007050 | 25 | 15 AATGACACGATCACTCCCGTTGAGT   | miRNA | hsa-mir-425    |
| t0007102 | 21 | 15 CTGGCCCTCTCTGCCCTTCCG       | miRNA | hsa-mir-328    |
| t0007126 | 20 | 15 TAATGGTAATGGTTCTCTTG        | miRNA | hsa-mir-451a   |
| t0007177 | 20 | 15 TGGCTCAGTTCAGCAGGAAC        | miRNA | hsa-mir-24-2   |
| t0007211 | 23 | 15 ACTGTGCGTGTGACAGCGGCTGA     | miRNA | hsa-mir-210    |
| t0007231 | 21 | 15 CACCCGGCTGTGTGCACATGT       | miRNA | hsa-mir-941-4  |
| t0007234 | 21 | 15 AAGCTCGGTCTGAGGCCCTC        | miRNA | hsa-mir-423    |
| t0007271 | 20 | 15 TACTAGACTGAAGCTCCTTG        | miRNA | hsa-mir-151a   |
| t0007328 | 22 | 15 TGTAGAGCAGGGAGCAGGAAGC      | miRNA | hsa-mir-4732   |
| t0007356 | 22 | 15 ATGGCCAGAGCTCACACAGAGG      | miRNA | hsa-mir-4435-2 |
| t0007383 | 21 | 15 CAGCAGCAATTCATGTTTTGA       | miRNA | hsa-mir-424    |
| t0007429 | 22 | 14 ACTCGGCGTGGCGTCGGTCGTG      | miRNA | hsa-mir-1307   |
| t0007454 | 20 | 14 TGAGAACCACGTCTGCTCTG        | miRNA | hsa-mir-589    |
| t0007530 | 21 | 14 AAAGTGCTGTTTCGTGCAGGTA      | miRNA | hsa-mir-93     |
| t0007647 | 22 | 14 CAGTGCAATGATGAAAGGGCAT      | miRNA | hsa-mir-130b   |
| t0007656 | 19 | 14 AGCTCGGTCTGAGGCCCT          | miRNA | hsa-mir-423    |
| t0007709 | 20 | 14 TACCCATTGCATATCGGAGT        | miRNA | hsa-mir-660    |
| t0007733 | 19 | 14 TGAGGTAGTAGGTTGTGTG         | miRNA | hsa-let-7b     |
| t0007783 | 23 | 14 AAAAGTGCTTACAGTGCAGGTAG     | miRNA | hsa-mir-106a   |
| t0007809 | 23 | 14 TTAATGCTAATCGTGATAGGGGT     | miRNA | hsa-mir-155    |
| t0007823 | 22 | 14 TGGAGAGAAAGGCAGTTCCTGA      | miRNA | hsa-mir-185    |
| t0007849 | 21 | 14 TACAGTATAGATGATGTACTA       | miRNA | hsa-mir-144    |
| t0007860 | 19 | 14 CCGTTACCATTACTGAGTT         | miRNA | hsa-mir-451a   |
| t0007900 | 18 | 14 TAAAGTGCTGACAGTGCA          | miRNA | hsa-mir-106b   |
| t0007917 | 18 | 14 TGAGGTAGTAGGTTGTGT          | miRNA | hsa-let-7b     |
| t0007922 | 20 | 13 CTTTCAGTCAGATGTTTGCT        | miRNA | hsa-mir-30d    |
| t0008018 | 18 | 13 TCATCATATACTGTAAGT          | miRNA | hsa-mir-144    |
| t0008049 | 21 | 13 ATGACACGATCACTCCCGTTG       | miRNA | hsa-mir-425    |
| t0008070 | 21 | 13 ACAGTAGTCTGCACATTGGTT       | miRNA | hsa-mir-199b   |
| t0008074 | 23 | 13 TAATCCTTGCTACCTGGGTGAGA     | miRNA | hsa-mir-500b   |
| t0008105 | 22 | 13 CAACACCAGTCGATGGGCTGTC      | miRNA | hsa-mir-21     |
| t0008123 | 20 | 13 GAGGTAGTAGTTTGTACAGT        | miRNA | hsa-let-7g     |
| t0008226 | 19 | 13 CAAAGAATTCTCCTTTTGG         | miRNA | hsa-mir-186    |
| t0008304 | 20 | 13 TGAGCGCCTCGACGACAGAG        | miRNA | hsa-mir-339    |
| t0008307 | 21 | 13 CGCATCCCCTAGGGCATTGGT       | miRNA | hsa-mir-324    |
| t0008324 | 19 | 13 GGCAATGGTAGAACTCACA         | miRNA | hsa-mir-182    |
| t0008369 | 20 | 13 TACGTCATCGTTGTCATCGT        | miRNA | hsa-mir-598    |
| t0008371 | 27 | 13 CTGGATTCAAGTAATCCAGGATAGGCT | miRNA | hsa-mir-26a-2  |
| t0008424 | 22 | 13 CTGAGGGGCAGAGAGCGAGACT      | miRNA | hsa-mir-423    |
| t0008477 | 21 | 13 ATATCATCATATACTGTAAGT       | miRNA | hsa-mir-144    |
| t0008490 | 20 | 13 GACTATAGAACTTTCCCCCT        | miRNA | hsa-mir-625    |
| t0008499 | 21 | 13 TACCCATTGCATATCGGAGTT       | miRNA | hsa-mir-660    |
| t0008530 | 23 | 13 TGTAACAGCAACTCCATGTGGAA     | miRNA | hsa-mir-194-2  |

|          |    |                              |       |                |
|----------|----|------------------------------|-------|----------------|
| t0008544 | 20 | 13 CTATACAATCTACTGTCTTT      | miRNA | hsa-let-7a-3   |
| t0008578 | 23 | 13 TACAGTACTGTGATAACTGAAGG   | miRNA | hsa-mir-101-1  |
| t0008647 | 19 | 12 CGTACCGTGAGTAATAATG       | miRNA | hsa-mir-126    |
| t0008649 | 19 | 12 AGGGGCAGAGAGCCGAGACT      | miRNA | hsa-mir-423    |
| t0008677 | 21 | 12 AATGGTAATGGTTCTCTTGCT     | miRNA | hsa-mir-451a   |
| t0008719 | 18 | 12 TTCAAGTAATCCAGGATA        | miRNA | hsa-mir-26a-2  |
| t0008827 | 24 | 12 CAGTGCAATAGTATTGTCAAAGCA  | miRNA | hsa-mir-301a   |
| t0008829 | 19 | 12 AGGTAGTAGATTGTATAGT       | miRNA | hsa-let-7f-2   |
| t0008875 | 23 | 12 GTAGTGTTCCTACTTTATGGAT    | miRNA | hsa-mir-142    |
| t0008879 | 19 | 12 TGAGGTAGTAAGTTGTATT       | miRNA | hsa-mir-98     |
| t0008921 | 20 | 12 GCAATGGTAGAACTCACACT      | miRNA | hsa-mir-182    |
| t0008930 | 21 | 12 GTAAACATCCTTGACTGGAAG     | miRNA | hsa-mir-30e    |
| t0008970 | 20 | 12 AGTGCAATGATGAAAGGGCA      | miRNA | hsa-mir-130b   |
| t0008998 | 23 | 12 GTACAGTACTGTGATAACTGAAG   | miRNA | hsa-mir-101-2  |
| t0009059 | 22 | 12 TGAGGTAGGAGTTGTATAGTT     | miRNA | hsa-let-7e     |
| t0009065 | 18 | 12 GTAGTAGATTGTATAGTT        | miRNA | hsa-let-7f-2   |
| t0009102 | 21 | 12 TTGGGACTGATCTTGATGTCT     | miRNA | hsa-mir-3913-2 |
| t0009195 | 19 | 11 CTCGAGGAGCTCACAGTCT       | miRNA | hsa-mir-151b   |
| t0009208 | 22 | 11 CTGCCCTGGCCCGAGGGACCGA    | miRNA | hsa-mir-874    |
| t0009255 | 22 | 11 TACGTCATCGTTGTCATCGTCA    | miRNA | hsa-mir-598    |
| t0009403 | 21 | 11 TGGCGGCGGTAGTTATGGGCT     | miRNA | hsa-mir-4467   |
| t0009404 | 23 | 11 ACCCTATCAATATTGTCTCTGCT   | miRNA | hsa-mir-454    |
| t0009468 | 21 | 11 TAGACTGAAGCTCCTTGAGGA     | miRNA | hsa-mir-151a   |
| t0009566 | 20 | 11 CCGTTACCATTACTGAGTTT      | miRNA | hsa-mir-451a   |
| t0009567 | 21 | 11 TTCACCACCTTCTCCACCCAG     | miRNA | hsa-mir-197    |
| t0009575 | 22 | 11 TTGGCAATGGTAGAACTCACAC    | miRNA | hsa-mir-182    |
| t0009577 | 19 | 11 ACCGTTACCATTACTGAGT       | miRNA | hsa-mir-451a   |
| t0009583 | 19 | 11 CTGACCTATGAATTGACAG       | miRNA | hsa-mir-192    |
| t0009591 | 20 | 11 CTGGACTTGGAGTCAGAAGG      | miRNA | hsa-mir-378a   |
| t0009600 | 21 | 11 TTTCAGTCGGATGTTTACAGC     | miRNA | hsa-mir-30e    |
| t0009606 | 21 | 11 TCAAGAGCAATAACGAAAAAT     | miRNA | hsa-mir-335    |
| t0009607 | 22 | 11 TTTCCGGCTCGCGTGGGTGTGT    | miRNA | hsa-mir-1180   |
| t0009622 | 20 | 11 CAGTACTGTGATAACTGAAG      | miRNA | hsa-mir-101-2  |
| t0009636 | 24 | 11 TCAAAGTGCTTACAGTGCAGGTAG  | miRNA | hsa-mir-17     |
| t0009649 | 25 | 11 TTCAAGTAATCCAGGATAGGCTGTT | miRNA | hsa-mir-26a-2  |
| t0009701 | 21 | 11 TTCTAGTAAGAGTGGCAGTCC     | miRNA | hsa-mir-628    |
| t0009707 | 18 | 11 AATATTACTGTGCTGCTT        | miRNA | hsa-mir-16-2   |
| t0009833 | 23 | 11 TTGTGCAAATCTATGCAAACTG    | miRNA | hsa-mir-19a    |
| t0009914 | 18 | 11 GTACTIONGAGCTGCCCGAG      | miRNA | hsa-mir-486    |
| t0009925 | 21 | 11 GAACATTCAACGCTGTGCGGTG    | miRNA | hsa-mir-181a-1 |
| t0009933 | 21 | 11 TGATATGTTTGATATATTAGG     | miRNA | hsa-mir-190a   |
| t0009935 | 22 | 11 CTAGCACCATTTGAAATCAGTG    | miRNA | hsa-mir-29b-2  |
| t0010027 | 19 | 11 CAAAGTGCTGTTCTGTGCAG      | miRNA | hsa-mir-93     |
| t0010066 | 20 | 11 TAGCACCATCTGAAATCGGT      | miRNA | hsa-mir-29a    |
| t0010100 | 19 | 10 TGTA AACATCCCCGACTGG      | miRNA | hsa-mir-30d    |
| t0010114 | 22 | 10 ATGCACCTGGGCAAGGATTCTG    | miRNA | hsa-mir-500a   |
| t0010123 | 23 | 10 CCGGTCCCAGGAGAACCTGCAGA   | miRNA | hsa-mir-4746   |
| t0010143 | 24 | 10 CAAAGTGCTCATAGTGCAGGTAGT  | miRNA | hsa-mir-20b    |
| t0010173 | 21 | 10 TTCTCTGTTTTGGCCATGTGT     | miRNA | hsa-mir-942    |
| t0010175 | 23 | 10 AATCCTTGGAACCTAGGTGTGAG   | miRNA | hsa-mir-362    |
| t0010249 | 22 | 10 TCCCCAGGTGTGATTCTGATT     | miRNA | hsa-mir-361    |
| t0010281 | 21 | 10 TCTTCTCTGTTTTGGCCATGT     | miRNA | hsa-mir-942    |
| t0010305 | 22 | 10 AACCCGTAGATCCGAACCTGTG    | miRNA | hsa-mir-100    |
| t0010409 | 20 | 10 AGCAGCACGTAAATATTGGC      | miRNA | hsa-mir-16-2   |
| t0010432 | 22 | 10 GAAGTTCTGTTATACACTCAGG    | miRNA | hsa-mir-148b   |
| t0010440 | 21 | 10 ACCCTGTAGATCCGAATTTGT     | miRNA | hsa-mir-10a    |
| t0010463 | 20 | 10 TCTACTGTAGTATGGGCACT      | miRNA | hsa-mir-20b    |
| t0010542 | 22 | 10 TTGAGAATGATGAATCATTAGG    | miRNA | hsa-mir-580    |

|          |    |                            |       |                |
|----------|----|----------------------------|-------|----------------|
| t0010567 | 21 | 10 TGTCAGTTTGTCAAATACCCC   | miRNA | hsa-mir-223    |
| t0010610 | 22 | 10 ACTCTTCCCTGTTGCACTACT   | miRNA | hsa-mir-130b   |
| t0010615 | 23 | 10 AGAGTTGAGTCTGGACGTCCCGA | miRNA | hsa-mir-219-1  |
| t0010630 | 23 | 10 ACAGGGTAGAACCACGGACAGGA | miRNA | hsa-mir-140    |
| t0010632 | 22 | 10 CATCCCTTGCATGGTGGAGGGT  | miRNA | hsa-mir-188    |
| t0010651 | 21 | 10 TATGGAAAGACTTTGCCACTC   | miRNA | hsa-mir-3688-2 |
| t0010656 | 19 | 10 AGTTCTTCAGTGGCAAGCT     | miRNA | hsa-mir-22     |
| t0010729 | 22 | 10 CTGAGGTAGTAGTTTGTGCTGT  | miRNA | hsa-let-7i     |
| t0010755 | 22 | 10 TGTGACAATAGAGATGAACATG  | miRNA | hsa-mir-4504   |
| t0010850 | 20 | 10 ACAGTACTGTGATAACTGAA    | miRNA | hsa-mir-101-2  |
| t0010854 | 22 | 10 AATCTGAGAAGGCGCACAAGGT  | miRNA | hsa-mir-3200   |
| t0010879 | 19 | 10 TCAGTGCATCACAGAACTT     | miRNA | hsa-mir-148b   |
| t0010889 | 20 | 10 TGTA AACATCCTCGACTGGA   | miRNA | hsa-mir-30a    |
| t0010894 | 20 | 10 AAGCAGCATTGTACAGGGCT    | miRNA | hsa-mir-107    |
| t0010903 | 21 | 10 ATGGTAATGGTTCTCTTGCTA   | miRNA | hsa-mir-451a   |
| t0010986 | 20 | 10 ACCGCACTGTGGGTA CTTC    | miRNA | hsa-mir-106b   |
| t0011013 | 23 | 10 CACTAGATTGTGAGCTCCTGGAG | miRNA | hsa-mir-28     |
| t0011020 | 20 | 9 TGTGCAAATCTATGCAAAC      | miRNA | hsa-mir-19a    |
| t0011038 | 18 | 9 CAGTACTGTGATAACTGA       | miRNA | hsa-mir-101-2  |
| t0011068 | 20 | 9 AAAGTGCTTACAGTGCAGGT     | miRNA | hsa-mir-106a   |
| t0011180 | 20 | 9 TGTCTTACTCCCTCAGGCAC     | miRNA | hsa-mir-550a-3 |
| t0011222 | 20 | 9 AGGTAGTAGTTTGTGCTGTT     | miRNA | hsa-let-7i     |
| t0011228 | 19 | 9 TATACGACCTGCTGCCTTT      | miRNA | hsa-let-7d     |
| t0011229 | 18 | 9 TGCCAGTTGAAGAACTGT       | miRNA | hsa-mir-22     |
| t0011293 | 18 | 9 ATCATCATATACTGTAAG       | miRNA | hsa-mir-144    |
| t0011350 | 23 | 9 TTCAAGTAATTCAGGATAGGTTG  | miRNA | hsa-mir-26b    |
| t0011353 | 20 | 9 TGCGGGGCTAGGGCTAACAG     | miRNA | hsa-mir-744    |
| t0011365 | 22 | 9 TAGCACCATTTGAAATCAGTGT   | miRNA | hsa-mir-29b-2  |
| t0011419 | 22 | 9 AGGATGAGCAAAGAAAGTAGAT   | miRNA | hsa-mir-1255a  |
| t0011512 | 23 | 9 AGCTTCTTTACAGTGTGCCTTG   | miRNA | hsa-mir-103a-2 |
| t0011538 | 19 | 9 CAACACCAGTCGATGGGCT      | miRNA | hsa-mir-21     |
| t0011547 | 22 | 9 TACAGTAGTCTGCACATTGGTT   | miRNA | hsa-mir-199b   |
| t0011571 | 23 | 9 TCAGGCTCAGTCCCCTCCCGATA  | miRNA | hsa-mir-484    |
| t0011576 | 23 | 9 CATTATTACTTTTGGTACGCGCT  | miRNA | hsa-mir-126    |
| t0011578 | 18 | 9 CTAGACTGAAGCTCCTTG       | miRNA | hsa-mir-151a   |
| t0011647 | 24 | 9 TCCTGTACTGAGCTGCCCCGAGGC | miRNA | hsa-mir-486    |
| t0011708 | 18 | 9 GTAGTAGGTTGTATAGTT       | miRNA | hsa-let-7a-3   |
| t0011744 | 22 | 9 ATTATTACTTTTGGTACGCGCT   | miRNA | hsa-mir-126    |
| t0011762 | 23 | 9 CATCCTGTACTGAGCTGCCCGA   | miRNA | hsa-mir-486    |
| t0011777 | 18 | 9 TACTAGACTGAAGCTCCT       | miRNA | hsa-mir-151a   |
| t0011858 | 24 | 9 CATTGCACTTGTCTCGGTCTGACA | miRNA | hsa-mir-25     |
| t0011889 | 21 | 9 AGGGGCAGAGAGCGAGACTTT    | miRNA | hsa-mir-423    |
| t0011990 | 22 | 9 ACCACTGACCGTTGACTGTACC   | miRNA | hsa-mir-181a-2 |
| t0012047 | 19 | 9 TTTAGTAATGGTAATGGTT      | miRNA | hsa-mir-451a   |
| t0012059 | 20 | 9 CCACCTCCCCTGCAAACGTC     | miRNA | hsa-mir-1306   |
| t0012086 | 20 | 9 ATTGCACTTGTCTCGGTCTG     | miRNA | hsa-mir-25     |
| t0012089 | 23 | 9 CTGTGCGTGTGACAGCGGCTGAT  | miRNA | hsa-mir-210    |
| t0012133 | 21 | 9 ACTGCCCTAAGTGCTCCTTCT    | miRNA | hsa-mir-18a    |
| t0012147 | 20 | 8 AGGGCTTCTCTCTGCAGGA      | miRNA | hsa-mir-3158-2 |
| t0012186 | 22 | 8 AGTGCAATATTGCTTATAGGGT   | miRNA | hsa-mir-454    |
| t0012250 | 23 | 8 TGAGA ACTGAATCCATGGGTTG  | miRNA | hsa-mir-146a   |
| t0012283 | 19 | 8 ACCACTGACCGTTGACTGT      | miRNA | hsa-mir-181a-2 |
| t0012290 | 22 | 8 TTTCTTCTTAGACATGGCAGCT   | miRNA | hsa-mir-4659b  |
| t0012366 | 20 | 8 CTATA CAATCTATTGCCTTC    | miRNA | hsa-let-7f-1   |
| t0012393 | 22 | 8 AGGACCTTCCCTGAACCAAGGA   | miRNA | hsa-mir-659    |
| t0012425 | 21 | 8 AGTTCTTCAGTGGCAAGCTTT    | miRNA | hsa-mir-22     |
| t0012444 | 20 | 8 ATGGCACTGGTAGAATTCAC     | miRNA | hsa-mir-183    |
| t0012504 | 19 | 8 AGCATTGTACAGGGCTATG      | miRNA | hsa-mir-103a-1 |

|          |    |                             |       |                |
|----------|----|-----------------------------|-------|----------------|
| t0012523 | 21 | 8 TACCCTGTAGAACCGAATTTG     | miRNA | hsa-mir-10b    |
| t0012763 | 20 | 8 TGGAGAGAAAGGCAGTTCCT      | miRNA | hsa-mir-185    |
| t0012788 | 20 | 8 TTGGCAATGGTAGAACTCAC      | miRNA | hsa-mir-182    |
| t0012796 | 21 | 8 AATGCACCCGGGCAAGGATTC     | miRNA | hsa-mir-501    |
| t0012904 | 22 | 8 TTTGGGACTGATCTTGATGTCT    | miRNA | hsa-mir-3913-2 |
| t0012980 | 22 | 8 TATGGAAAGACTTTGCCACTCT    | miRNA | hsa-mir-3688-2 |
| t0012984 | 19 | 8 CAAAAGCAATCGCGGTTTT       | miRNA | hsa-mir-548e   |
| t0013020 | 20 | 8 GTGAGGTAGTAGGTTGTATA      | miRNA | hsa-let-7a-3   |
| t0013046 | 18 | 8 TTCACAGTGGCTAAGTTC        | miRNA | hsa-mir-27b    |
| t0013047 | 21 | 8 CCAAACTGCAGTTACTTTTG      | miRNA | hsa-mir-548o-2 |
| t0013117 | 19 | 8 CAAAGTGCTTACAGTGCAG       | miRNA | hsa-mir-17     |
| t0013128 | 21 | 8 TTCACAGTGGCTAAGTTCTGC     | miRNA | hsa-mir-27b    |
| t0013147 | 23 | 8 AACCGTTACCATTACTGAGTTTA   | miRNA | hsa-mir-451a   |
| t0013170 | 20 | 8 TTATAATACAACCTGATAAG      | miRNA | hsa-mir-374a   |
| t0013233 | 23 | 8 AATCTGAGAAGGCGCACAAAGGTT  | miRNA | hsa-mir-3200   |
| t0013312 | 19 | 8 CACCAATATTACTGTGCTG       | miRNA | hsa-mir-16-2   |
| t0013314 | 19 | 8 AGGTAGTAGGTTGTATAGT       | miRNA | hsa-let-7a-3   |
| t0013361 | 18 | 8 CCGCACTGTGGGTACTTG        | miRNA | hsa-mir-106b   |
| t0013466 | 21 | 8 TAACACTGTCTGGTAAAGATG     | miRNA | hsa-mir-141    |
| t0013569 | 20 | 8 AAAGAATTCTCCTTTTGGGC      | miRNA | hsa-mir-186    |
| t0013637 | 21 | 8 GTAGTGTTCCTACTTTATGG      | miRNA | hsa-mir-142    |
| t0013648 | 21 | 8 TATTGCACATTAAGTTGC        | miRNA | hsa-mir-32     |
| t0013703 | 24 | 8 ATGACACGATCACTCCCGTTGAGT  | miRNA | hsa-mir-425    |
| t0013720 | 21 | 7 CAGAGTCTCGTTCTGTTGCC      | miRNA | hsa-mir-1273c  |
| t0013780 | 20 | 7 ATCCTGTACTGAGCTGCCCC      | miRNA | hsa-mir-486    |
| t0013787 | 22 | 7 AGGGGGATGGCAGAGCAAATT     | miRNA | hsa-mir-5010   |
| t0013842 | 23 | 7 AGCTACATTGTCTGCTGGGTTTC   | miRNA | hsa-mir-221    |
| t0013930 | 18 | 7 TGTAACAGCAACTCCATG        | miRNA | hsa-mir-194-2  |
| t0013940 | 20 | 7 AGGTAGTAGATTGTATAGTT      | miRNA | hsa-let-7f-2   |
| t0013973 | 25 | 7 CGTGTATTTGACAAGCTGAGTTGGA | miRNA | hsa-mir-223    |
| t0013984 | 22 | 7 CGAATCATTATTTGCTGCTCTA    | miRNA | hsa-mir-15b    |
| t0014054 | 19 | 7 ATCACATTGCCAGGGATTT       | miRNA | hsa-mir-23a    |
| t0014062 | 20 | 7 CAAGTAATCCAGGATAGGCT      | miRNA | hsa-mir-26a-2  |
| t0014111 | 20 | 7 CTGGGAGAGGGTTGTTTACT      | miRNA | hsa-mir-30c-1  |
| t0014170 | 20 | 7 TTGCACTTGTCTCGGTCTGA      | miRNA | hsa-mir-25     |
| t0014230 | 21 | 7 GTGAGGTAGTAGGTTGTATAG     | miRNA | hsa-let-7a-3   |
| t0014265 | 21 | 7 CTGCGCAAGCTACTGCCTTGC     | miRNA | hsa-let-7i     |
| t0014285 | 22 | 7 TAACGCATAATATGGACATGTT    | miRNA | hsa-mir-3912   |
| t0014311 | 20 | 7 TTTCCGGCTCGCGTGGGTGT      | miRNA | hsa-mir-1180   |
| t0014313 | 20 | 7 AAAAGTAATTGCGTTTTTTG      | miRNA | hsa-mir-548au  |
| t0014338 | 21 | 7 TTATCAGAATCTCCAGGGGTA     | miRNA | hsa-mir-361    |
| t0014370 | 21 | 7 AAAGATTCTGAGCAATAACCT     | miRNA | hsa-mir-4678   |
| t0014384 | 23 | 7 GTGAGGTAGTAGGTTGTATAGTT   | miRNA | hsa-let-7a-3   |
| t0014458 | 20 | 7 ACTAGACTGAAGCTCCTTGA      | miRNA | hsa-mir-151a   |
| t0014472 | 21 | 7 AGCTACATCTGGCTACTGGGT     | miRNA | hsa-mir-222    |
| t0014478 | 20 | 7 TTA AAACTTTAAGTGTGCCT     | miRNA | hsa-mir-5582   |
| t0014519 | 23 | 7 ACTGCCCTAAGTGTCTCTTCTGG   | miRNA | hsa-mir-18a    |
| t0014537 | 20 | 7 TAGTACCAGTACCTTGTGTT      | miRNA | hsa-mir-624    |
| t0014544 | 21 | 7 CCTCCGTGTTACCTGTCCTCT     | miRNA | hsa-mir-3605   |
| t0014545 | 18 | 7 AGAGGTAGTAGGTTGCAT        | miRNA | hsa-let-7d     |
| t0014575 | 23 | 7 TAGCAGCACATAATGGTTTGTGG   | miRNA | hsa-mir-15a    |
| t0014584 | 22 | 7 AAAAGCTGGGTTGAGAGGGCAA    | miRNA | hsa-mir-320b-2 |
| t0014590 | 22 | 7 ATGAGGTAGTAGGTTGTATAGT    | miRNA | hsa-let-7a-1   |
| t0014620 | 23 | 7 AAGCTCGGTCTGAGGCCCTCAG    | miRNA | hsa-mir-423    |
| t0014676 | 22 | 7 CGGATGAGCAAAGAAAGTGGTT    | miRNA | hsa-mir-1255b- |
| t0014710 | 24 | 7 AGATAACTATAACAACCTACTGCCT | miRNA | hsa-let-7b     |
| t0014725 | 21 | 7 TCGACCGGACCTCGACCGGCT     | miRNA | hsa-mir-1307   |
| t0014734 | 20 | 7 AGGTAGTAGGTTGTATAGTT      | miRNA | hsa-let-7a-3   |

|          |    |                            |       |                |
|----------|----|----------------------------|-------|----------------|
| t0014750 | 21 | 7 ATTATGGTTTGCCTGGGACTG    | miRNA | hsa-mir-584    |
| t0014754 | 19 | 7 CAGCACGTAAATATTGGCG      | miRNA | hsa-mir-16-2   |
| t0014904 | 19 | 7 TGTCTTACTCCCTCAGGCA      | miRNA | hsa-mir-550a-3 |
| t0014949 | 21 | 7 TGGAGAGAAAGGCAGTTCCTG    | miRNA | hsa-mir-185    |
| t0014989 | 19 | 7 TGTCAGTTTGTCAAATACC      | miRNA | hsa-mir-223    |
| t0015043 | 20 | 7 TAGACTGAAGCTCCTTGAGG     | miRNA | hsa-mir-151a   |
| t0015112 | 21 | 7 GAGGTAGTAGGTTGCATAGTT    | miRNA | hsa-let-7d     |
| t0015143 | 22 | 7 TTTCAGTCAGATGTTTGCTGCT   | miRNA | hsa-mir-30d    |
| t0015205 | 20 | 7 CTGCAGTGAAGGCACTTGTA     | miRNA | hsa-mir-17     |
| t0015218 | 19 | 7 CGCACTGTGGGTACTTGCT      | miRNA | hsa-mir-106b   |
| t0015238 | 21 | 7 TTTAGGATAAGCTTGACTTTT    | miRNA | hsa-mir-651    |
| t0015259 | 19 | 7 ACCATCGACCGTTGATTGT      | miRNA | hsa-mir-181a-1 |
| t0015266 | 22 | 7 TCTGACCTATGAATTGACAGCC   | miRNA | hsa-mir-192    |
| t0015291 | 22 | 7 ATGGCATCGTCCCCTGGTGGCT   | miRNA | hsa-mir-4642   |
| t0015300 | 18 | 7 ATGAGGTAGTAGATTGTA       | miRNA | hsa-let-7f-2   |
| t0015323 | 23 | 7 GATGAGGATGGATAGCAAGGAAG  | miRNA | hsa-mir-3605   |
| t0015329 | 19 | 7 AGCTACATTGTCTGCTGGG      | miRNA | hsa-mir-221    |
| t0015340 | 22 | 7 CTGCGCAAGCTACTGCCTTGCT   | miRNA | hsa-let-7i     |
| t0015392 | 21 | 7 ACCGTTACCATTACTGAGTTT    | miRNA | hsa-mir-451a   |
| t0015540 | 23 | 7 GTAGCTTATCAGACTGATGTTGA  | miRNA | hsa-mir-21     |
| t0015571 | 21 | 7 ATAGATCTGGATTGGAACCCA    | miRNA | hsa-mir-607    |
| t0015631 | 22 | 7 ACCGCACTGTGGGTACTTGCTG   | miRNA | hsa-mir-106b   |
| t0015715 | 21 | 7 GTCAGTTTGTCAAATACCCA     | miRNA | hsa-mir-223    |
| t0015770 | 22 | 6 ACTAGATTGTGAGCTCCTGGAG   | miRNA | hsa-mir-28     |
| t0015847 | 23 | 6 TCAGTTATCACAGTGCTGATGCT  | miRNA | hsa-mir-101-1  |
| t0015851 | 18 | 6 GCACTGTGGGTACTTGCT       | miRNA | hsa-mir-106b   |
| t0015868 | 20 | 6 AACATTC AACCTGTCCGGTGA   | miRNA | hsa-mir-181c   |
| t0015887 | 22 | 6 GCCCTGACCTGTCCTGTTCTGC   | miRNA | hsa-mir-4732   |
| t0015889 | 19 | 6 AGCAGCACATAATGGTTTG      | miRNA | hsa-mir-15a    |
| t0016080 | 18 | 6 AAGTAATCCAGGATAGGC       | miRNA | hsa-mir-26a-2  |
| t0016082 | 18 | 6 AGTACTGTGATAACTGAA       | miRNA | hsa-mir-101-2  |
| t0016146 | 22 | 6 TGGCTCAGTTCAGCAGGAACAG   | miRNA | hsa-mir-24-2   |
| t0016257 | 18 | 6 CCAATTACTGTGCTGC         | miRNA | hsa-mir-16-2   |
| t0016270 | 24 | 6 AACATTCATTGCTGTCCGGTGGTT | miRNA | hsa-mir-181b-2 |
| t0016281 | 22 | 6 TGAGCGCCTCGACGACAGAGCC   | miRNA | hsa-mir-339    |
| t0016307 | 22 | 6 CCACAGGGTAGAACACGGACA    | miRNA | hsa-mir-140    |
| t0016349 | 18 | 6 CACCCGGCTGTGTGCACA       | miRNA | hsa-mir-941-4  |
| t0016428 | 21 | 6 TAGTGCAATATTGCTTATAGG    | miRNA | hsa-mir-454    |
| t0016454 | 20 | 6 TCCCTGTCCTCCAGGAGCTC     | miRNA | hsa-mir-339    |
| t0016504 | 21 | 6 CGGATGAGCAAAGAAAGTGGT    | miRNA | hsa-mir-1255b- |
| t0016631 | 22 | 6 ACTGTGCGTGTGACAGCGGCTG   | miRNA | hsa-mir-210    |
| t0016674 | 19 | 6 TTGCACTTGTCCCGGCCTG      | miRNA | hsa-mir-92a-2  |
| t0016709 | 20 | 6 AATGCACCCGGGCAAGGATT     | miRNA | hsa-mir-501    |
| t0016826 | 22 | 6 CATATGGAAAGACTTTGCCACT   | miRNA | hsa-mir-3688-2 |
| t0016829 | 20 | 6 AACACACCTATTCAAGGATT     | miRNA | hsa-mir-362    |
| t0016856 | 20 | 6 CTAGGTATGGTCCCAGGGAT     | miRNA | hsa-mir-331    |
| t0016878 | 21 | 6 CTGTACAGGCCACTGCCTTGC    | miRNA | hsa-let-7g     |
| t0016975 | 21 | 6 TCGAGGAGCTCACAGTCTAGA    | miRNA | hsa-mir-151b   |
| t0017144 | 19 | 6 ATCATCATATACTGTAAGT      | miRNA | hsa-mir-144    |
| t0017259 | 22 | 6 TTATGGTTTGCCTGGGACTGAG   | miRNA | hsa-mir-584    |
| t0017369 | 21 | 6 ACGGAATCCCAAAGCAGCTG     | miRNA | hsa-mir-191    |
| t0017374 | 22 | 6 TTAATTTTTTGTTCGGTCACT    | miRNA | hsa-mir-4775   |
| t0017391 | 20 | 6 GAGGTAGTAGTTTGTGCTGT     | miRNA | hsa-let-7i     |
| t0017429 | 20 | 6 AAAAGTAATTGTGGTTTTTG     | miRNA | hsa-mir-548ae- |
| t0017439 | 23 | 6 CATTGCACTTGTCTCGGTCTGAC  | miRNA | hsa-mir-25     |
| t0017572 | 23 | 6 ACTGGCCTGGGACTACCGGGGT   | miRNA | hsa-mir-3176   |
| t0017585 | 21 | 6 TCGTACCGTGAGTAATAATGC    | miRNA | hsa-mir-126    |
| t0017637 | 21 | 6 TTGGGGAAACGGCCGCTGAGT    | miRNA | hsa-mir-2110   |



|          |    |                               |       |                |
|----------|----|-------------------------------|-------|----------------|
| t0017705 | 21 | 6 TATCATCATATACTGTAAGTT       | miRNA | hsa-mir-144    |
| t0017762 | 19 | 6 TTATAAAGCAATGAGACTG         | miRNA | hsa-mir-340    |
| t0017789 | 24 | 6 TTGTGCAAATCTATGCAAACTGA     | miRNA | hsa-mir-19a    |
| t0017812 | 18 | 6 TTATCAGACTGATGTTGA          | miRNA | hsa-mir-21     |
| t0017821 | 22 | 6 TCAAGTAATCCAGGATAGGCTG      | miRNA | hsa-mir-26a-2  |
| t0017929 | 20 | 6 ACTGCAGTGAAGGCACTTGT        | miRNA | hsa-mir-17     |
| t0018000 | 21 | 6 GTGCAAATCCATGCAAACTG        | miRNA | hsa-mir-19b-2  |
| t0018020 | 21 | 6 GTAGTACCAGTACCTTGTGTT       | miRNA | hsa-mir-624    |
| t0018054 | 20 | 6 AACATTCATTGCTGTCGGTG        | miRNA | hsa-mir-181b-2 |
| t0018100 | 19 | 6 GAGGTAGTAGTTTGTGCTG         | miRNA | hsa-let-7i     |
| t0018258 | 27 | 6 TAGCTTATCAGACTGATGTTGACTGTT | miRNA | hsa-mir-21     |
| t0018276 | 23 | 6 AGAGGTAGTAGGTTGCATAGTTT     | miRNA | hsa-let-7d     |
| t0018290 | 23 | 6 ATTCTAATTTCTCCACGTCTTTG     | miRNA | hsa-mir-576    |
| t0018360 | 18 | 6 CTATACGACCTGCTGCCT          | miRNA | hsa-let-7d     |
| t0018372 | 21 | 6 TTCACAGTGGCTAAGTTCCGC       | miRNA | hsa-mir-27a    |
| t0018418 | 19 | 6 ATCCTGTACTGAGCTGCCC         | miRNA | hsa-mir-486    |
| t0018422 | 20 | 6 ACAGTAGTCTGCACATTGGT        | miRNA | hsa-mir-199b   |
| t0018427 | 22 | 6 AAAGCTGGGTTGAGAGGGCGAA      | miRNA | hsa-mir-320a   |
| t0018455 | 21 | 6 CGGTTTGAGGCTACAGTGAGA       | miRNA | hsa-mir-1304   |
| t0018467 | 22 | 6 TCGGGGCAGCTCAGTACAGGAT      | miRNA | hsa-mir-486    |
| t0018541 | 18 | 5 ATTGCACTTGTCTCGGTC          | miRNA | hsa-mir-25     |
| t0018603 | 23 | 5 TTCACCACCTTCTCCACCCAGCA     | miRNA | hsa-mir-197    |
| t0018617 | 19 | 5 ACTGCCCCAGGTGCTGCTG         | miRNA | hsa-mir-324    |
| t0018686 | 20 | 5 AGGTAGTAGTTTGTACAGTT        | miRNA | hsa-let-7g     |
| t0018842 | 23 | 5 CAAAAGTAATTGCGGTCTTTGGT     | miRNA | hsa-mir-548j   |
| t0018852 | 22 | 5 TAAGGTGCATCTAGTGCAGATA      | miRNA | hsa-mir-18a    |
| t0018964 | 20 | 5 TACCACAGGGTAGAACCACG        | miRNA | hsa-mir-140    |
| t0019016 | 19 | 5 AAAAGTAATTGCGGTTTTT         | miRNA | hsa-mir-548au  |
| t0019044 | 19 | 5 TCAGGCTCAGTCCCCTCCC         | miRNA | hsa-mir-484    |
| t0019057 | 20 | 5 ACCACAGGGTAGAACCACGG        | miRNA | hsa-mir-140    |
| t0019133 | 21 | 5 AAAGTGCTTACAGTGCAGGTA       | miRNA | hsa-mir-106a   |
| t0019162 | 20 | 5 CTCCGTTTGCCTGTTTCGCT        | miRNA | hsa-mir-1468   |
| t0019167 | 21 | 5 TTGCAGCTGCCTGGGAGTGAC       | miRNA | hsa-mir-1301   |
| t0019174 | 20 | 5 ACCGTTACCATTACTGAGTT        | miRNA | hsa-mir-451a   |
| t0019180 | 22 | 5 GCCCTGTGGACTCAGTTCTGGT      | miRNA | hsa-mir-146b   |
| t0019194 | 21 | 5 TGTTCTCTGTCTCCCAGACT        | miRNA | hsa-mir-4326   |
| t0019218 | 21 | 5 CAGCTACATTGTCTGCTGGGT       | miRNA | hsa-mir-221    |
| t0019340 | 21 | 5 TGTGCTTGCTCGTCCC GCCCG      | miRNA | hsa-mir-636    |
| t0019486 | 24 | 5 TTAATGCTAATCGTGATAGGGGTT    | miRNA | hsa-mir-155    |
| t0019659 | 20 | 5 CCACAGGGTAGAACCACGGA        | miRNA | hsa-mir-140    |
| t0019713 | 24 | 5 TTCAAGTAATTCAGGATAGGTTGT    | miRNA | hsa-mir-26b    |
| t0019789 | 18 | 5 TAGCAGCACGTAATATT           | miRNA | hsa-mir-16-2   |
| t0019948 | 24 | 5 AATCCTTGGAACCTAGGTGTGAGT    | miRNA | hsa-mir-362    |
| t0019955 | 18 | 5 TTATGGTTTGCCTGGGAC          | miRNA | hsa-mir-584    |
| t0019969 | 21 | 5 TCAACAGACATTAATTGGGCG       | miRNA | hsa-mir-421    |
| t0020046 | 22 | 5 CTGGCCCTCTCTGCCCTTCCGT      | miRNA | hsa-mir-328    |
| t0020065 | 21 | 5 GCAGCATTGTACAGGGCTATG       | miRNA | hsa-mir-103a-1 |
| t0020094 | 21 | 5 CCTCCACACCCAAGGCTTGC        | miRNA | hsa-mir-532    |
| t0020113 | 22 | 5 AAAGTGCTTACAGTGCAGGTAG      | miRNA | hsa-mir-106a   |
| t0020222 | 23 | 5 TGTCTCCAACCCTTGTACCAGT      | miRNA | hsa-mir-150    |
| t0020288 | 20 | 5 ATCACATTGCCAGGGATTTC        | miRNA | hsa-mir-23a    |
| t0020306 | 23 | 5 GTAAACATCCTACACTCTCAGCT     | miRNA | hsa-mir-30c-1  |
| t0020410 | 20 | 5 AATGCACCTGGGCAAGGATT        | miRNA | hsa-mir-502    |
| t0020436 | 19 | 5 TGTA AACATCCTACACTCA        | miRNA | hsa-mir-30b    |
| t0020469 | 22 | 5 TATA CAAGGGCAAGCTCTCTGT     | miRNA | hsa-mir-381    |
| t0020518 | 23 | 5 CCCCAGGTGTGATTCTGATTTG      | miRNA | hsa-mir-361    |
| t0020550 | 19 | 5 TACGTCATCGTTGTCATCG         | miRNA | hsa-mir-598    |
| t0020560 | 22 | 5 TGCCCTGTGGACTCAGTTCTGG      | miRNA | hsa-mir-146b   |

|          |    |                             |       |                |
|----------|----|-----------------------------|-------|----------------|
| t0020609 | 20 | 5 CTGAGGTAGTAGTTTGTACA      | miRNA | hsa-let-7g     |
| t0020645 | 21 | 5 CCAGTGGGGCTGCTGTTATCT     | miRNA | hsa-mir-194-2  |
| t0020684 | 24 | 5 TATTGCACTTGTCCCGCCTGTGG   | miRNA | hsa-mir-92a-2  |
| t0020733 | 20 | 5 AGTTCTTCAGTGGCAAGCTT      | miRNA | hsa-mir-22     |
| t0020809 | 22 | 5 ACTGGCCTGGGACTACCGGGG     | miRNA | hsa-mir-3176   |
| t0020919 | 21 | 5 TAATTTTAGATCTGGTCTGCT     | miRNA | hsa-mir-4771-2 |
| t0020946 | 21 | 5 TCTAGGTATGGTCCCAGGGAT     | miRNA | hsa-mir-331    |
| t0020986 | 23 | 5 TGCCCTGTGGACTCAGTTCTGGT   | miRNA | hsa-mir-146b   |
| t0021015 | 22 | 5 GAGGGGCAGAGAGCGAGACTTT    | miRNA | hsa-mir-423    |
| t0021026 | 19 | 5 GCCCTGACCTGTCCTGTTC       | miRNA | hsa-mir-4732   |
| t0021078 | 20 | 5 CTAGATTGTGAGCTCCTGGA      | miRNA | hsa-mir-28     |
| t0021092 | 23 | 5 CTGACCTATGAATTGACAGCCAG   | miRNA | hsa-mir-192    |
| t0021212 | 19 | 5 TGCGGGGCTAGGGCTAACA       | miRNA | hsa-mir-744    |
| t0021227 | 19 | 5 GTTACCATTACTGAGTTTA       | miRNA | hsa-mir-451a   |
| t0021287 | 23 | 5 AGATAACTATAACAACCTACTGCC  | miRNA | hsa-let-7b     |
| t0021295 | 22 | 5 TCGGATCCGTCTGAGCTTGGCT    | miRNA | hsa-mir-127    |
| t0021297 | 22 | 5 AGCTACATCTGGCTACTGGGTC    | miRNA | hsa-mir-222    |
| t0021302 | 24 | 5 TAGGTAGTTTCTGTTGTTGGGAT   | miRNA | hsa-mir-196b   |
| t0021327 | 19 | 5 CAACGGAATCCCAAAGCA        | miRNA | hsa-mir-191    |
| t0021334 | 21 | 5 AATCCTTGCTATCTGGGTGCT     | miRNA | hsa-mir-502    |
| t0021370 | 22 | 5 TTCTCTGTTTTGGCCATGTGTG    | miRNA | hsa-mir-942    |
| t0021428 | 20 | 5 TTCTCTGTTTTGGCCATGTG      | miRNA | hsa-mir-942    |
| t0021487 | 21 | 5 AGCTTATCAGACTGATGTTGA     | miRNA | hsa-mir-21     |
| t0021548 | 22 | 5 ATTGCACGGTATCCATCTGTAA    | miRNA | hsa-mir-363    |
| t0021645 | 20 | 5 ATGAGGTAGTAGATTGTATA      | miRNA | hsa-let-7f-2   |
| t0021684 | 21 | 5 GTTCACAGTGGCTAAGTTCTG     | miRNA | hsa-mir-27b    |
| t0021749 | 21 | 5 TAGCACCATTTGAAATCAGTG     | miRNA | hsa-mir-29b-2  |
| t0021850 | 19 | 5 AACATTCATTGCTGTCGGT       | miRNA | hsa-mir-181b-2 |
| t0021893 | 20 | 5 ACTGCCCCAGGTGCTGCTGG      | miRNA | hsa-mir-324    |
| t0021905 | 21 | 5 TCTCCCTTCTGCCCTGGCTA      | miRNA | hsa-mir-4685   |
| t0021977 | 21 | 5 GTGAGGACTCGGGAGGTGGAG     | miRNA | hsa-mir-1224   |
| t0022049 | 25 | 5 AACCGTTACCATTACTGAGTTTAGT | miRNA | hsa-mir-451a   |
| t0022102 | 18 | 5 TGGCAATGGTAGAACTCA        | miRNA | hsa-mir-182    |
| t0022255 | 19 | 5 TTTAGGATAAGCTTGA          | miRNA | hsa-mir-651    |
| t0022286 | 23 | 5 AGGATGAGCAAAGAAAGTAGATT   | miRNA | hsa-mir-1255a  |
| t0022437 | 22 | 5 ATATCATCATATACTGTAAGTT    | miRNA | hsa-mir-144    |
| t0022474 | 18 | 5 CAAAGTGCTGTTTCGTGCA       | miRNA | hsa-mir-93     |
| t0022587 | 21 | 4 TCTCACACAGAAATCGCACCC     | miRNA | hsa-mir-342    |
| t0022642 | 18 | 4 TGCTGTTTCGTGCAGGTAG       | miRNA | hsa-mir-93     |
| t0022853 | 18 | 4 CACTAGATTGTGAGCTCC        | miRNA | hsa-mir-28     |
| t0022956 | 22 | 4 AAGGAGCTCACAGTCTATTGAG    | miRNA | hsa-mir-28     |
| t0023151 | 21 | 4 ATTCTAATTTCTCCACGTCTT     | miRNA | hsa-mir-576    |
| t0023200 | 20 | 4 TGAGTGTGTGTGTGTGAGTG      | miRNA | hsa-mir-574    |
| t0023287 | 19 | 4 TACCATTGCATATCGGAG        | miRNA | hsa-mir-660    |
| t0023381 | 22 | 4 TGAGCTAAATGTGTGCTGGGAC    | miRNA | hsa-mir-610    |
| t0023385 | 21 | 4 GTAAACATCCTACACTCAGCT     | miRNA | hsa-mir-30b    |
| t0023455 | 19 | 4 AGTGCAATGATGAAAGGGC       | miRNA | hsa-mir-130b   |
| t0023459 | 22 | 4 ATGCTGACATATTTACTAGAGG    | miRNA | hsa-mir-628    |
| t0023472 | 22 | 4 TGATATGTTTGATATTGGGTTG    | miRNA | hsa-mir-190b   |
| t0023576 | 21 | 4 TGAGAACTGAATCCATAGGC      | miRNA | hsa-mir-146b   |
| t0023613 | 22 | 4 GCTCGGTCTGAGGCCCTCAGT     | miRNA | hsa-mir-423    |
| t0023696 | 21 | 4 TCCCTGAGACCCTTAACCTG      | miRNA | hsa-mir-125a   |
| t0023729 | 21 | 4 TCAGTGCATCACAGAACTTTG     | miRNA | hsa-mir-148b   |
| t0023756 | 22 | 4 TTGTGCAAATCTATGCAAACT     | miRNA | hsa-mir-19a    |
| t0023787 | 19 | 4 ATTGCACTCGTCCCGGCT        | miRNA | hsa-mir-92b    |
| t0023861 | 21 | 4 ATGGCCAGAGCTCACACAGAG     | miRNA | hsa-mir-4435-2 |
| t0023873 | 19 | 4 ACATTCATTGCTGTCGGTG       | miRNA | hsa-mir-181b-2 |
| t0023980 | 21 | 4 TAATTTTATGTATAAGCTAGT     | miRNA | hsa-mir-590    |

|          |    |                             |       |                |
|----------|----|-----------------------------|-------|----------------|
| t0024058 | 20 | 4 CCTCCCACACCCAAGGCTTG      | miRNA | hsa-mir-532    |
| t0024113 | 21 | 4 CGAAAACAGCAATTACCTTTG     | miRNA | hsa-mir-570    |
| t0024213 | 21 | 4 GCCCCTGGGCCTATCCTAGAA     | miRNA | hsa-mir-331    |
| t0024359 | 20 | 4 AAAGTTCTGAGACACTCCGA      | miRNA | hsa-mir-148a   |
| t0024384 | 23 | 4 CACCAATATTACTGTGCTGCTTT   | miRNA | hsa-mir-16-2   |
| t0024473 | 20 | 4 ATGCACCTGGGCAAGGATTC      | miRNA | hsa-mir-502    |
| t0024649 | 21 | 4 CCACCTCCCCTGCAAACGTCC     | miRNA | hsa-mir-1306   |
| t0024671 | 21 | 4 CTCCTGACTCCAGGTCCTGTG     | miRNA | hsa-mir-378a   |
| t0024776 | 21 | 4 AGGGGGATGGCAGAGCAAAAT     | miRNA | hsa-mir-5010   |
| t0024981 | 20 | 4 TTAGTAATGGTAATGGTTCT      | miRNA | hsa-mir-451a   |
| t0025071 | 21 | 4 AGTGCAATGATGAAAGGGCAT     | miRNA | hsa-mir-130b   |
| t0025095 | 20 | 4 GTTACCATTACTGAGTTTAG      | miRNA | hsa-mir-451a   |
| t0025138 | 21 | 4 CTGAGGTAGTAGTTTGTACAG     | miRNA | hsa-let-7g     |
| t0025294 | 20 | 4 GTGAGGACTCGGGAGGTGGA      | miRNA | hsa-mir-1224   |
| t0025340 | 22 | 4 TCCCTGAGACCCTTTAACCTGT    | miRNA | hsa-mir-125a   |
| t0025419 | 22 | 4 CCGTTACCATTACTGAGTTTAG    | miRNA | hsa-mir-451a   |
| t0025435 | 22 | 4 AAAAGTTATTGCGTTTTGGCT     | miRNA | hsa-mir-548at  |
| t0025475 | 19 | 4 TCAGTTATCACAGTGCTGA       | miRNA | hsa-mir-101-1  |
| t0025839 | 22 | 4 CGTGTATTTGACAAGCTGAGTT    | miRNA | hsa-mir-223    |
| t0025987 | 19 | 4 TGAGGTAGTAGGTTGTATG       | miRNA | hsa-let-7c     |
| t0026155 | 20 | 4 AGTGTTCCTACTTTATGGA       | miRNA | hsa-mir-142    |
| t0026187 | 23 | 4 CCGTTACCATTACTGAGTTTAGT   | miRNA | hsa-mir-451a   |
| t0026257 | 20 | 4 TTTAGTAATGGTAATGGTTC      | miRNA | hsa-mir-451a   |
| t0026357 | 21 | 4 TCAGTTATCACAGTGCTGATG     | miRNA | hsa-mir-101-1  |
| t0026526 | 21 | 4 ATAACATTGTAAAGCGCTTCT     | miRNA | hsa-mir-3143   |
| t0026595 | 24 | 4 TGTAGAGCAGGGAGCAGGAAGCTG  | miRNA | hsa-mir-4732   |
| t0026696 | 21 | 4 CCATCGGGAATGTCGTGTCGG     | miRNA | hsa-mir-425    |
| t0026744 | 19 | 4 CAAAACACTGCAGTTACTTT      | miRNA | hsa-mir-548o-2 |
| t0026746 | 18 | 4 CAAATCTATGCAAAACTG        | miRNA | hsa-mir-19a    |
| t0026856 | 21 | 4 TCACACAGAAATCGCACCCGT     | miRNA | hsa-mir-342    |
| t0026967 | 19 | 4 AATGCACCTGGGCAAGGAT       | miRNA | hsa-mir-502    |
| t0027024 | 25 | 4 AAAAGCTGGGTTGAGAGGGCGAAAA | miRNA | hsa-mir-320a   |
| t0027098 | 19 | 4 AACCGTTACCATTACTGAG       | miRNA | hsa-mir-451a   |
| t0027129 | 24 | 4 ATGCACCTGGGCAAGGATTCTGAG  | miRNA | hsa-mir-500a   |
| t0027276 | 23 | 4 TTTTGTGTCTCCATTCCCAGA     | miRNA | hsa-mir-5010   |
| t0027343 | 21 | 4 ATTGTCAGGTAGTGATAGGAT     | miRNA | hsa-mir-4999   |
| t0027420 | 21 | 4 AATCTGAGAAGGCGCACAAGG     | miRNA | hsa-mir-3200   |
| t0027589 | 22 | 4 TTGCACTTGTCTCGGTCTGACA    | miRNA | hsa-mir-25     |
| t0027714 | 21 | 4 TGTAGAGCAGGGAGCAGGAAG     | miRNA | hsa-mir-4732   |
| t0027894 | 22 | 4 CACTGGACTTGGAGTCAGAAGG    | miRNA | hsa-mir-378a   |
| t0027919 | 21 | 4 TCAAGTAATTCAGGATAGGTT     | miRNA | hsa-mir-26b    |
| t0027970 | 19 | 4 GCACTTGTCCCGCCTGTT        | miRNA | hsa-mir-92a-1  |
| t0028217 | 24 | 4 GAACATTCAACGCTGTCGGTGAGT  | miRNA | hsa-mir-181a-1 |
| t0028296 | 22 | 4 TTCTGGATAACATGCTGAAGCT    | miRNA | hsa-mir-5706   |
| t0028312 | 19 | 4 TGAGATGAAGCACTGTAGC       | miRNA | hsa-mir-143    |
| t0028376 | 21 | 4 TCTCTCGGCTCCTCGCGGCTC     | miRNA | hsa-mir-3615   |
| t0028496 | 19 | 4 AATGACACGATCACTCCCG       | miRNA | hsa-mir-425    |
| t0028586 | 19 | 4 ATAGATCTGGATTGGAACC       | miRNA | hsa-mir-607    |
| t0028625 | 24 | 4 TAGTAGGTTGTATAGTTGGGGCT   | miRNA | hsa-let-7a-3   |
| t0028658 | 23 | 4 TCCCTGTCCTCCAGGAGCTCACG   | miRNA | hsa-mir-339    |
| t0028705 | 22 | 4 GCAGTGCAATGATGAAAGGGCA    | miRNA | hsa-mir-130b   |
| t0028806 | 22 | 4 ACAGGGTAGAACCACGGACAGG    | miRNA | hsa-mir-140    |
| t0028917 | 21 | 4 TAGAGGAGATGGCGCAGGGGA     | miRNA | hsa-mir-877    |
| t0029039 | 21 | 4 ATTGCACTCGTCCCGCCTCC      | miRNA | hsa-mir-92b    |
| t0029042 | 22 | 4 CTGCCCTAGTCTAGCTGAAGCT    | miRNA | hsa-mir-3157   |
| t0029090 | 22 | 4 CTCCGTTTGCCTGTTTCGCTGA    | miRNA | hsa-mir-1468   |
| t0029235 | 20 | 4 TTCTGCCTCTGTCCAGGTCC      | miRNA | hsa-mir-5001   |
| t0029261 | 22 | 4 CAGGGGCTGGCTTTCCTCTGGT    | miRNA | hsa-mir-185    |

|          |    |                             |       |                |
|----------|----|-----------------------------|-------|----------------|
| t0029410 | 22 | 4 ATGACACGATCACTCCCGTTGA    | miRNA | hsa-mir-425    |
| t0029466 | 18 | 4 TATCATCATATACTGTAA        | miRNA | hsa-mir-144    |
| t0029624 | 20 | 4 AGGGGCTGGCTTTCCTCTGG      | miRNA | hsa-mir-185    |
| t0029649 | 20 | 4 TGAGAACTGAATCCATAGG       | miRNA | hsa-mir-146b   |
| t0029654 | 19 | 4 AATTGCACGGTATCCATCT       | miRNA | hsa-mir-363    |
| t0029745 | 19 | 4 GCATTGTACAGGGCTATGA       | miRNA | hsa-mir-103a-1 |
| t0029766 | 20 | 4 ACATTCAACGCTGTCCGGTA      | miRNA | hsa-mir-181a-1 |
| t0029769 | 24 | 4 TGAGGTAGTAGATTGTATAGTTGT  | miRNA | hsa-let-7f-1   |
| t0029786 | 21 | 4 ATGCACCTGGGCAAGGATTCT     | miRNA | hsa-mir-500a   |
| t0029913 | 21 | 4 AAAGCTCGGTCTGAGGCCCT      | miRNA | hsa-mir-423    |
| t0029964 | 21 | 4 GTGCAAATCTATGCAAACTG      | miRNA | hsa-mir-19a    |
| t0029968 | 20 | 4 AAAGATTCTGAGCAATAACC      | miRNA | hsa-mir-4678   |
| t0030047 | 22 | 4 TCGCGGTTTGTGCCAGATGACG    | miRNA | hsa-mir-579    |
| t0030073 | 19 | 4 TCGAGGAGCTCACAGTCTA       | miRNA | hsa-mir-151b   |
| t0030159 | 18 | 4 GCATTGTACAGGGCTATG        | miRNA | hsa-mir-103a-1 |
| t0030184 | 21 | 4 AGTGCCTGAGGGAGTAAGAGC     | miRNA | hsa-mir-550a-2 |
| t0030233 | 22 | 4 ACATTACTTTTGGTACGCG       | miRNA | hsa-mir-126    |
| t0030294 | 20 | 4 TGCTGGATCAGTGGTTCGAG      | miRNA | hsa-mir-1287   |
| t0030353 | 19 | 4 AACGGAATCCCAAAGCAG        | miRNA | hsa-mir-191    |
| t0030442 | 19 | 4 TATCATCATATACTGTAAG       | miRNA | hsa-mir-144    |
| t0030460 | 21 | 4 AACATTCATTGCTGTCGGTGG     | miRNA | hsa-mir-181b-2 |
| t0030570 | 24 | 4 TCAGTGCCTACAGAACTTTGTCT   | miRNA | hsa-mir-148a   |
| t0030614 | 19 | 4 CTATACAGTCTACTGTCTT       | miRNA | hsa-let-7f-2   |
| t0030647 | 23 | 3 TTTTGCAATATGTTCTGAATAT    | miRNA | hsa-mir-450b   |
| t0030712 | 20 | 3 TTCACCACCTTCTCCACCCA      | miRNA | hsa-mir-197    |
| t0030776 | 25 | 3 TAGTGCAATATTGCTTATAGGGTTT | miRNA | hsa-mir-454    |
| t0031027 | 21 | 3 TGACCGATTTCTCCTGGTGT      | miRNA | hsa-mir-29c    |
| t0031300 | 19 | 3 AGTGTTCCTACTTTATGG        | miRNA | hsa-mir-142    |
| t0031315 | 21 | 3 AACTGGTTGAACAACCTGAACC    | miRNA | hsa-mir-582    |
| t0031544 | 21 | 3 GTAGCAGCACATAATGGTTTG     | miRNA | hsa-mir-15a    |
| t0031561 | 23 | 3 CAGTGCAATGATATTGTCAAAGC   | miRNA | hsa-mir-301b   |
| t0031611 | 23 | 3 TTGAGGTAGTAGGTTGTATAGTT   | miRNA | hsa-let-7a-2   |
| t0031669 | 22 | 3 TAACTGGTTGAACAACCTGAACC   | miRNA | hsa-mir-582    |
| t0031872 | 22 | 3 TTTCTTCTTAGACATGGCAACG    | miRNA | hsa-mir-4659a  |
| t0031912 | 20 | 3 TAAGGTGCATCTAGTGCAGT      | miRNA | hsa-mir-18b    |
| t0031991 | 19 | 3 CACTAGATTGTGAGCTCCT       | miRNA | hsa-mir-28     |
| t0031997 | 22 | 3 CTGCATTATGAGCACTTAAAGT    | miRNA | hsa-mir-20a    |
| t0032013 | 24 | 3 ACTGTGCGTGTGACAGCGGCTGAT  | miRNA | hsa-mir-210    |
| t0032042 | 20 | 3 TACTGCCCTAAATGCCCTT       | miRNA | hsa-mir-18b    |
| t0032503 | 21 | 3 TGTGAGGTTGGCATTGTTGTC     | miRNA | hsa-mir-1294   |
| t0032509 | 20 | 3 CCTGTTCTCCATTACTTGGC      | miRNA | hsa-mir-26b    |
| t0032653 | 22 | 3 TAACAGTCTACAGCCATGGTCG    | miRNA | hsa-mir-132    |
| t0032865 | 22 | 3 TAGTGGATGATGGAGACTCGGT    | miRNA | hsa-mir-3691   |
| t0033276 | 22 | 3 ATGGTAATGGTTCTCTTGCTAT    | miRNA | hsa-mir-451a   |
| t0033287 | 20 | 3 CTCGGCGTGGCGTCGGTCGT      | miRNA | hsa-mir-1307   |
| t0033373 | 21 | 3 TCCCCAGGTGTGATTCTGAT      | miRNA | hsa-mir-361    |
| t0033389 | 20 | 3 GAAAGACATAGGATAGAGTC      | miRNA | hsa-mir-641    |
| t0033449 | 19 | 3 AATATTACTGTGCTGCTTT       | miRNA | hsa-mir-16-2   |
| t0033503 | 20 | 3 AAGGGCTTCTCTCTGCAGG       | miRNA | hsa-mir-3158-2 |
| t0033538 | 23 | 3 TGAGCGCTCGACGACAGAGCCG    | miRNA | hsa-mir-339    |
| t0033632 | 23 | 3 TAGCACCATTTGAAATCAGTGTT   | miRNA | hsa-mir-29b-2  |
| t0033861 | 22 | 3 CATCGGGAATGTCGTGCCGCC     | miRNA | hsa-mir-425    |
| t0034086 | 22 | 3 CTGGACTTGGAGTCAGAAGGCC    | miRNA | hsa-mir-378a   |
| t0034213 | 20 | 3 CGAGGAGCTCACAGTCTAGT      | miRNA | hsa-mir-151a   |
| t0034224 | 21 | 3 TGAGGATGGATAGCAAGGAAG     | miRNA | hsa-mir-3605   |
| t0034410 | 21 | 3 TCGAATCCCAGCGGTGCCTCC     | miRNA | hsa-mir-3676   |
| t0034568 | 22 | 3 CAGTGGTTTTACCTATGGTAG     | miRNA | hsa-mir-140    |
| t0034608 | 18 | 3 TCAGAACAAATGCCGGTT        | miRNA | hsa-mir-589    |

|          |    |                                 |       |                |
|----------|----|---------------------------------|-------|----------------|
| t0034611 | 20 | 3 AGCCTGGAAGCTGGAGCCTG          | miRNA | hsa-mir-1254-2 |
| t0034986 | 24 | 3 AGTTTTGCAGGTTTGCATCCAGCT      | miRNA | hsa-mir-19b-1  |
| t0035053 | 21 | 3 TGTAGTGTTTCCTACTTTATG         | miRNA | hsa-mir-142    |
| t0035131 | 24 | 3 TATTGCACTTGTCCCGGCTGTTG       | miRNA | hsa-mir-92a-1  |
| t0035426 | 23 | 3 AGGCGGAGACTTGGGCAATTGCT       | miRNA | hsa-mir-25     |
| t0035912 | 20 | 3 CAAAACCTGCAGTTACTTTT          | miRNA | hsa-mir-548o-2 |
| t0035964 | 21 | 3 AGGACCTTCCCTGAACCAAGG         | miRNA | hsa-mir-659    |
| t0036128 | 19 | 3 AAAACCGTCTAGTTACAGT           | miRNA | hsa-mir-1537   |
| t0036155 | 19 | 3 GTGCATTGTAGTTGCATTG           | miRNA | hsa-mir-33a    |
| t0036159 | 22 | 3 TGAGATGAAGCACTGTAGCTCA        | miRNA | hsa-mir-143    |
| t0036219 | 20 | 3 CACTTGTAAATGGAGAACA           | miRNA | hsa-mir-4473   |
| t0036300 | 21 | 3 CAAAAGCAATCGCGTTTTTG          | miRNA | hsa-mir-548e   |
| t0036341 | 22 | 3 AGCAGCATTGTACAGGGCTATC        | miRNA | hsa-mir-107    |
| t0036778 | 20 | 3 CACTAGATTGTGAGCTCCTG          | miRNA | hsa-mir-28     |
| t0037092 | 22 | 3 TAGCAGCACAGAAATATTGGCA        | miRNA | hsa-mir-195    |
| t0037154 | 22 | 3 ATTCTAATTTCTCCACGTCTTT        | miRNA | hsa-mir-576    |
| t0037272 | 22 | 3 ACGCATAATATGGACATGTTAT        | miRNA | hsa-mir-3912   |
| t0037500 | 25 | 3 AGCTTCTTTACAGTGCTGCCTTGTA     | miRNA | hsa-mir-103a-2 |
| t0037598 | 21 | 3 GTTCTGCTGAACTGAGCCAG          | miRNA | hsa-mir-3074   |
| t0037623 | 20 | 3 TCAGTGCATCACAGAACTTT          | miRNA | hsa-mir-148b   |
| t0037628 | 20 | 3 ACTGGAGATATGGAAGAGCT          | miRNA | hsa-mir-1270-2 |
| t0037930 | 23 | 3 AATGGCGCCACTAGGGTTGTGCA       | miRNA | hsa-mir-652    |
| t0038054 | 19 | 3 TGAGCGCCTCGACGACAGA           | miRNA | hsa-mir-339    |
| t0038139 | 18 | 3 TGCACCTGTCCCGGCCTG            | miRNA | hsa-mir-92a-2  |
| t0038260 | 21 | 3 CAGCCCGGATCCCAGCCCACT         | miRNA | hsa-mir-3940   |
| t0038268 | 21 | 3 CTTCTCGTCTGTCTGCCCA           | miRNA | hsa-mir-1238   |
| t0038326 | 21 | 3 TCTGACCTATGAATTGACAGC         | miRNA | hsa-mir-192    |
| t0038471 | 22 | 3 GCACCATTTGAAATCGGTTATG        | miRNA | hsa-mir-29c    |
| t0038604 | 20 | 3 ATATCATCATATACTGTAAG          | miRNA | hsa-mir-144    |
| t0038651 | 18 | 3 ATTACTTTTTGGTACG              | miRNA | hsa-mir-126    |
| t0038776 | 22 | 3 AGTGCCTGAGGGAGTAAGAGCC        | miRNA | hsa-mir-550a-2 |
| t0038841 | 31 | 3 TTTGGCAATGGTAGAACTCACACTGGTGA | miRNA | hsa-mir-182    |
| t0038948 | 22 | 3 GAGCGCCTCGACGACAGAGCCG        | miRNA | hsa-mir-339    |
| t0039024 | 18 | 3 GAGGTAGTAGGTTGTATA            | miRNA | hsa-let-7a-3   |
| t0039220 | 19 | 3 GGGGCAGCTCAGTACAGGA           | miRNA | hsa-mir-486    |
| t0039288 | 21 | 3 TCTAGTAAGAGTGGCAGTCGA         | miRNA | hsa-mir-628    |
| t0039401 | 18 | 3 TCAGTGCATCACAGAACT            | miRNA | hsa-mir-148b   |
| t0039438 | 24 | 3 TGGGGAGCTGAGGCTCTGGGGGTG      | miRNA | hsa-mir-939    |
| t0039473 | 19 | 3 TAAAGTGCTTATAGTGCAG           | miRNA | hsa-mir-20a    |
| t0039501 | 19 | 3 ATCAACGCTGTCCGGTGA            | miRNA | hsa-mir-181a-1 |
| t0039548 | 21 | 3 CTGACTGAATAGGTAGGGTCA         | miRNA | hsa-mir-3136   |
| t0039706 | 21 | 3 TCAGTAAATGTTTATTAGATG         | miRNA | hsa-mir-545    |
| t0039763 | 21 | 3 CCTGACCTGTCTGTTCTGCC          | miRNA | hsa-mir-4732   |
| t0040038 | 21 | 3 GCCCTGTGGACTCAGTTCTGG         | miRNA | hsa-mir-146b   |
| t0040079 | 21 | 3 AGGCGGAGACTTGGGCAATTG         | miRNA | hsa-mir-25     |
| t0040115 | 21 | 3 TAGTGTTTCCTACTTTATGGA         | miRNA | hsa-mir-142    |
| t0040507 | 20 | 3 GCTGGTTTCACATGGTGGCT          | miRNA | hsa-mir-29b-2  |
| t0040557 | 22 | 3 AATGCACCCGGGCAAGGATTCT        | miRNA | hsa-mir-501    |
| t0040577 | 20 | 3 CGCATCCCCTAGGGCATTGG          | miRNA | hsa-mir-324    |
| t0040619 | 18 | 3 CATGCCTTGAGTGTAGGA            | miRNA | hsa-mir-532    |
| t0040758 | 18 | 3 GTAGTAGTTTGTACAGTT            | miRNA | hsa-let-7g     |
| t0040759 | 19 | 3 TACCCTGTAGAACCGAATT           | miRNA | hsa-mir-10b    |
| t0040891 | 18 | 3 GAATCCCAAAAGCAGCTG            | miRNA | hsa-mir-191    |
| t0040935 | 21 | 3 AGACTGAAGCTCCTTGAGGAC         | miRNA | hsa-mir-151a   |
| t0041018 | 23 | 3 AACATTCATTGTTGTCGGTGGGT       | miRNA | hsa-mir-181d   |
| t0041068 | 20 | 3 TCTCACACAGAAATCGCACC          | miRNA | hsa-mir-342    |
| t0041227 | 22 | 3 TGTGGGACTTCTGGCCTTGACT        | miRNA | hsa-mir-3922   |
| t0041952 | 19 | 3 TGTATGGCACTGGTAGAAT           | miRNA | hsa-mir-183    |

|          |    |                              |       |                |
|----------|----|------------------------------|-------|----------------|
| t0042118 | 20 | 3 AGTGCAATGTAAAAGGGCA        | miRNA | hsa-mir-130a   |
| t0042310 | 19 | 3 TGCAC TTGTCCC GGCCTGT      | miRNA | hsa-mir-92a-2  |
| t0042450 | 23 | 3 TCAAGAGCAATAACGAAAAATGT    | miRNA | hsa-mir-335    |
| t0042513 | 20 | 3 GCTACATTGTCTGCTGGGTT       | miRNA | hsa-mir-221    |
| t0042634 | 18 | 3 ATCACATTGCCAGGGATT         | miRNA | hsa-mir-23b    |
| t0042875 | 22 | 3 TGTT CCTCTGTCTCCCAGACTC    | miRNA | hsa-mir-4326   |
| t0042887 | 23 | 3 CCTCAGTAAATGTTTATTAGATG    | miRNA | hsa-mir-545    |
| t0043057 | 22 | 3 CCTGTACTGAGCTGCCCCGAGG     | miRNA | hsa-mir-486    |
| t0043194 | 20 | 3 TATAAAATGAGGGCAGTAAG       | miRNA | hsa-mir-3163   |
| t0043298 | 22 | 3 TTTTACTGTTCCCTCCTAGAGT     | miRNA | hsa-mir-4779   |
| t0043393 | 23 | 3 AGTGCAATATTGCTTATAGGGTT    | miRNA | hsa-mir-454    |
| t0043429 | 23 | 3 AGCTACATCTGGCTACTGGGTCT    | miRNA | hsa-mir-222    |
| t0043506 | 21 | 3 TGGGTTTACGTTGGGAGAACT      | miRNA | hsa-mir-629    |
| t0043908 | 24 | 3 ATATCATCATATACTGTAAGTTTG   | miRNA | hsa-mir-144    |
| t0044000 | 20 | 3 TGTACTGAGCTGCCCCGAGG       | miRNA | hsa-mir-486    |
| t0044070 | 22 | 3 ATA ACTATA CAATCTACTGTCT   | miRNA | hsa-let-7a-3   |
| t0044151 | 20 | 3 CAACAAATCACAGTCTGCCA       | miRNA | hsa-mir-7-1    |
| t0044344 | 18 | 3 GTGAGGTAGTAGGTTGTA         | miRNA | hsa-let-7a-3   |
| t0044394 | 20 | 3 ATGGCCAGAGCTCACACAGA       | miRNA | hsa-mir-4435-2 |
| t0044410 | 21 | 3 TTACACAGCTGGACAGAGGCA      | miRNA | hsa-mir-4672   |
| t0044457 | 20 | 3 TAGATCTGGATTGGAACCCA       | miRNA | hsa-mir-607    |
| t0044530 | 21 | 3 ACCCATTGCATATCGGAGTTG      | miRNA | hsa-mir-660    |
| t0044586 | 18 | 3 TCGTACCGTGAGTAATAA         | miRNA | hsa-mir-126    |
| t0044611 | 26 | 3 TTGGCAATGGTAGAACTCACACTGGT | miRNA | hsa-mir-182    |
| t0044813 | 22 | 3 ATTATGGTTTGCCTGGGACTGA     | miRNA | hsa-mir-584    |
| t0044872 | 21 | 3 TCAGGACACTTCTGA ACTTGG     | miRNA | hsa-mir-5000   |
| t0045055 | 21 | 3 GAGGGGCAGAGAGCGAGACTT      | miRNA | hsa-mir-423    |
| t0045236 | 19 | 3 AAAGAATTCTCCTTTTGGG        | miRNA | hsa-mir-186    |
| t0045407 | 20 | 3 TTGGGACTGATCTTGATGTC       | miRNA | hsa-mir-3913-2 |
| t0045688 | 22 | 3 TTGAGAACTGAATTCCATGGGT     | miRNA | hsa-mir-146a   |
| t0045767 | 22 | 3 TCCCTGAGACCCTA ACTTGTA     | miRNA | hsa-mir-125b-2 |
| t0045946 | 23 | 3 TGATATGTTTGATATATTAGGTT    | miRNA | hsa-mir-190a   |
| t0045997 | 22 | 3 GGCAATGGTAGAACTCACACTG     | miRNA | hsa-mir-182    |
| t0045999 | 21 | 3 GTTACCATTACTGAGTTTAGT      | miRNA | hsa-mir-451a   |
| t0046131 | 22 | 3 TAATCCTTGCTACCTGGGTGAG     | miRNA | hsa-mir-500b   |
| t0046252 | 22 | 3 CACCCGGCTGTGTGCACATGTG     | miRNA | hsa-mir-941-4  |
| t0046321 | 18 | 3 CTGACCTATGAATTGACA         | miRNA | hsa-mir-192    |
| t0046854 | 19 | 3 ATTCTAATTTCTCCACGTC        | miRNA | hsa-mir-576    |
| t0046885 | 20 | 3 CCTGACTGTTGCCGTCTCC        | miRNA | hsa-mir-943    |
| t0046897 | 22 | 3 ACTGCAGTGAAGGCACTTG TAG    | miRNA | hsa-mir-17     |
| t0046913 | 20 | 3 TTATCAGAATCTCCAGGGGT       | miRNA | hsa-mir-361    |
| t0047025 | 20 | 3 GCAGCATTGTACAGGGCTAT       | miRNA | hsa-mir-107    |
| t0047074 | 20 | 3 TCTAGTAAGAGTGGCAGTCG       | miRNA | hsa-mir-628    |
| t0047232 | 25 | 3 GGGGTGCTATCTGTGATTGAGGGAC  | miRNA | hsa-mir-342    |
| t0047648 | 22 | 3 TATATATATATGTACGTATG       | miRNA | hsa-mir-1277   |
| t0047743 | 23 | 3 AAAGTGCTGTTCTGTCAGGTAGT    | miRNA | hsa-mir-93     |
| t0047799 | 21 | 3 TCAGTAAGTGGCACTCTGTCT      | miRNA | hsa-mir-4797   |
| t0047866 | 25 | 3 AGGGGTGCTATCTGTGATTGAGGGA  | miRNA | hsa-mir-342    |
| t0047905 | 21 | 3 AGGATGAGCAAAGAAAGTAGA      | miRNA | hsa-mir-1255a  |
| t0047945 | 22 | 3 ATAGGACTCATATAGTGCCAGG     | miRNA | hsa-mir-3117   |
| t0048020 | 22 | 3 CTAGCAGCACGTAAATATTGGC     | miRNA | hsa-mir-16-2   |
| t0048132 | 22 | 3 GACTATAGA ACTTTCCCCCTCA    | miRNA | hsa-mir-625    |
| t0048263 | 18 | 3 ATGGTAGAACTCACACTG         | miRNA | hsa-mir-182    |
| t0048269 | 21 | 3 CAGTGCAATAGTATTGTCAA       | miRNA | hsa-mir-301a   |
| t0048393 | 22 | 3 CTCCTGACTCCAGGTCCTGTGT     | miRNA | hsa-mir-378a   |
| t0048431 | 23 | 3 TTTACGTTGGGAGAACTTTTACG    | miRNA | hsa-mir-629    |
| t0048542 | 24 | 2 TGAGAACTGAATCCATGGGTTGT    | miRNA | hsa-mir-146a   |
| t0048632 | 21 | 2 CCATGCCTTGAGTGTAGGACC      | miRNA | hsa-mir-532    |

|          |    |                                 |       |                |
|----------|----|---------------------------------|-------|----------------|
| t0048848 | 23 | 2 TACTGCCCTAAATGCCCTTCTG        | miRNA | hsa-mir-18b    |
| t0048967 | 22 | 2 ATGCCTTGAGTGTAGGACCGTT        | miRNA | hsa-mir-532    |
| t0049126 | 20 | 2 GGGGCAGAGAGCGAGACTTT          | miRNA | hsa-mir-423    |
| t0049493 | 21 | 2 ATCAGGGCTTGTGGAATGGGA         | miRNA | hsa-mir-3127   |
| t0050171 | 20 | 2 ACTGCAATGTAAGCACTTCT          | miRNA | hsa-mir-106a   |
| t0050327 | 18 | 2 TGCACCTGTCTCGGTCTG            | miRNA | hsa-mir-25     |
| t0050784 | 18 | 2 TAAAGTGCTTATAGTGCA            | miRNA | hsa-mir-20a    |
| t0051084 | 21 | 2 AGGGGTGCTATCTGTGATTGA         | miRNA | hsa-mir-342    |
| t0051209 | 23 | 2 TTATCAGACTGATGTTGACTGTT       | miRNA | hsa-mir-21     |
| t0051283 | 21 | 2 TAAGGTGCATCTAGTGCAGTT         | miRNA | hsa-mir-18b    |
| t0051461 | 22 | 2 AACATTCATTGTTGTCGGTGGG        | miRNA | hsa-mir-181d   |
| t0051463 | 21 | 2 ACTCAAACCCTTCAGTGACT          | miRNA | hsa-mir-616    |
| t0051482 | 25 | 2 TACCGCACTGTGGGTACTTGCTGCT     | miRNA | hsa-mir-106b   |
| t0051598 | 22 | 2 TATAGATCTGGATTGGAACCCA        | miRNA | hsa-mir-607    |
| t0051834 | 22 | 2 TAACACTGTCTGGTAAAGATGG        | miRNA | hsa-mir-141    |
| t0051869 | 19 | 2 ATAGGACTCATATAGTGCC           | miRNA | hsa-mir-3117   |
| t0051950 | 20 | 2 TGGCGGCGGTAGTTATGGGC          | miRNA | hsa-mir-4467   |
| t0051971 | 23 | 2 ACTGGGAAGAGGAGCTGAGGGAC       | miRNA | hsa-mir-4646   |
| t0052116 | 22 | 2 TTTGGTCCCCTTCAACCAGCTG        | miRNA | hsa-mir-133a-2 |
| t0052117 | 21 | 2 GAATCATTATTTGCTGCTCTA         | miRNA | hsa-mir-15b    |
| t0052168 | 25 | 2 TAGCAGCACATAATGGTTTGTGGAT     | miRNA | hsa-mir-15a    |
| t0052884 | 20 | 2 TTTGGGACTGATCTTGATGT          | miRNA | hsa-mir-3913-2 |
| t0052926 | 22 | 2 TAAAACTTTAAGTGTGCCTAGG        | miRNA | hsa-mir-5582   |
| t0052930 | 18 | 2 AGGTAGTAGATTGTATAG            | miRNA | hsa-let-7f-2   |
| t0053021 | 21 | 2 ATAAAGTAGAAAGCACTACTA         | miRNA | hsa-mir-142    |
| t0053186 | 20 | 2 GCTTATCAGACTGATGTTGA          | miRNA | hsa-mir-21     |
| t0053198 | 22 | 2 TCAGAACAAATGCCGGTCCCA         | miRNA | hsa-mir-589    |
| t0053295 | 20 | 2 TACCGCACTGTGGGTACTTG          | miRNA | hsa-mir-106b   |
| t0053415 | 21 | 2 GTAGAGGAGATGGCGCAGGGG         | miRNA | hsa-mir-877    |
| t0053430 | 24 | 2 TTGGGGAAACGGCCGCTGAGTGAG      | miRNA | hsa-mir-2110   |
| t0053624 | 19 | 2 TGTAGTGTTTCTACTTTA            | miRNA | hsa-mir-142    |
| t0053640 | 18 | 2 GCACTGGTAGAATTCCT             | miRNA | hsa-mir-183    |
| t0053884 | 22 | 2 TAGACTGAAGCTCCTTGAGGAC        | miRNA | hsa-mir-151a   |
| t0053908 | 18 | 2 TGTTTCTACTTTATGGA             | miRNA | hsa-mir-142    |
| t0053921 | 21 | 2 TCTCCAGTATTAAGTGTGCTG         | miRNA | hsa-mir-16-1   |
| t0054160 | 22 | 2 TCAAGAGCAATAACGAAAATG         | miRNA | hsa-mir-335    |
| t0054321 | 18 | 2 GTTGTACTTTTTTTTTTTG           | miRNA | hsa-mir-3613   |
| t0054385 | 19 | 2 ACAGTATAGATGATGTACT           | miRNA | hsa-mir-144    |
| t0054420 | 20 | 2 CTGGTACAGGCCTGGGGGAC          | miRNA | hsa-mir-150    |
| t0054442 | 19 | 2 CTATACAATCTACTGTCTT           | miRNA | hsa-let-7a-3   |
| t0054501 | 21 | 2 AGGCCAAAGGAAGAGAACAGA         | miRNA | hsa-mir-4753   |
| t0054513 | 22 | 2 CATCCTGTACTGAGCTGCCCCG        | miRNA | hsa-mir-486    |
| t0054728 | 22 | 2 GGACCTTCCCTGAACCAAGGAA        | miRNA | hsa-mir-659    |
| t0054837 | 22 | 2 ATAGTAGACCGTATAGCGTACG        | miRNA | hsa-mir-411    |
| t0054915 | 23 | 2 CTGTGCAAATCCATGCAAAACTG       | miRNA | hsa-mir-19b-2  |
| t0054959 | 20 | 2 TTCCTATGCATATACTTCTT          | miRNA | hsa-mir-202    |
| t0055247 | 20 | 2 CAGCAGCAATTCATGTTTTG          | miRNA | hsa-mir-424    |
| t0055452 | 23 | 2 AAAGCTGGGTTGAGAGGGCGAAA       | miRNA | hsa-mir-320a   |
| t0055707 | 21 | 2 CGAGGAGCTCACAGTCTAGTA         | miRNA | hsa-mir-151a   |
| t0055805 | 21 | 2 TTTTGTGTCTCCATTCCCCA          | miRNA | hsa-mir-5010   |
| t0056026 | 22 | 2 CCAAAGAATTCTCCTTTTGGGC        | miRNA | hsa-mir-186    |
| t0056357 | 20 | 2 ACCATCGACCGTTGATTGTA          | miRNA | hsa-mir-181a-1 |
| t0056958 | 21 | 2 TTGTGCAAATCTATGCAAAC          | miRNA | hsa-mir-19a    |
| t0057020 | 33 | 2 TTTGGCAATGGTAGAACTCACACTGGTGA | miRNA | hsa-mir-182    |
| t0057573 | 19 | 2 TAGTACCAGTACCTTGTGT           | miRNA | hsa-mir-624    |
| t0057597 | 20 | 2 AAGGAGCTCACAGTCTATTG          | miRNA | hsa-mir-28     |
| t0057887 | 19 | 2 CAATATTACTGTGCTGCTT           | miRNA | hsa-mir-16-2   |
| t0057891 | 22 | 2 GAGGTAGTAGATTGTATAGTTT        | miRNA | hsa-let-7f-2   |

|          |    |                             |       |                |
|----------|----|-----------------------------|-------|----------------|
| t0057942 | 23 | 2 AGGGGTGCTATCTGTGATTGAGG   | miRNA | hsa-mir-342    |
| t0058105 | 19 | 2 ATGGTAGAACTCACACTGG       | miRNA | hsa-mir-182    |
| t0058667 | 19 | 2 GAGGTAGTAGATTGTATAG       | miRNA | hsa-let-7f-2   |
| t0058999 | 20 | 2 AAAAGTACTTGCGGATTTTG      | miRNA | hsa-mir-548k   |
| t0059528 | 22 | 2 AAAGGTAATTGTGGTTTCTGCC    | miRNA | hsa-mir-548ag- |
| t0059551 | 22 | 2 AGGGGCAGAGAGCGAGACTTTT    | miRNA | hsa-mir-423    |
| t0059659 | 20 | 2 GAGGTAGTAGGTTGTGTGGT      | miRNA | hsa-let-7b     |
| t0059917 | 20 | 2 TGTGGGACTTCTGGCCTTGA      | miRNA | hsa-mir-3922   |
| t0059921 | 23 | 2 CTCGGGGCAGCTCAGTACAGGAT   | miRNA | hsa-mir-486    |
| t0059961 | 22 | 2 AGTAGCAGCACATAATGGTTTG    | miRNA | hsa-mir-15a    |
| t0060098 | 21 | 2 AACGGCAATGACTTTTGTACC     | miRNA | hsa-mir-548al  |
| t0060138 | 20 | 2 AGGGGGAAAGTTCTATAGTC      | miRNA | hsa-mir-625    |
| t0060314 | 18 | 2 CATCATATACTGTAAGTT        | miRNA | hsa-mir-144    |
| t0060426 | 23 | 2 AAGTTCTGTTATACACTCAGGCT   | miRNA | hsa-mir-148b   |
| t0060435 | 22 | 2 TCAGGACACTTCTGAACTTGGGA   | miRNA | hsa-mir-5000   |
| t0060452 | 22 | 2 ACAGCCCGGATCCCAGCCCACT    | miRNA | hsa-mir-3940   |
| t0060546 | 21 | 2 TTTCTCCTAAGGCAGTCCCTG     | miRNA | hsa-mir-3199-2 |
| t0060578 | 22 | 2 TTGCAGCTGCCTGGGAGTGACT    | miRNA | hsa-mir-1301   |
| t0060902 | 22 | 2 ATTTGGGACTGATCTTGATGTC    | miRNA | hsa-mir-3913-2 |
| t0061093 | 20 | 2 GGCAATGGTAGAACTCACAC      | miRNA | hsa-mir-182    |
| t0061425 | 19 | 2 CTATACAACCTACTGCCTT       | miRNA | hsa-let-7b     |
| t0061502 | 18 | 2 ATATCATCATATACTGTA        | miRNA | hsa-mir-144    |
| t0061744 | 20 | 2 CAGTAAGTGGCACTCTGTCT      | miRNA | hsa-mir-4797   |
| t0062147 | 20 | 2 ATTCAACGCTGTCCGGTGAGT     | miRNA | hsa-mir-181a-1 |
| t0062156 | 19 | 2 TCAAGTAATTCAGGATAGG       | miRNA | hsa-mir-26b    |
| t0062383 | 21 | 2 AAACCATCGACCGTTGATTGT     | miRNA | hsa-mir-181a-1 |
| t0062490 | 21 | 2 AAAAGTTATTGCGTTTTGGC      | miRNA | hsa-mir-548at  |
| t0062862 | 22 | 2 TTTGTTTCGTTCCGGCTCGCGTGA  | miRNA | hsa-mir-375    |
| t0062897 | 20 | 2 ATGACACGATCACTCCCGTT      | miRNA | hsa-mir-425    |
| t0063093 | 20 | 2 AGTGCCTACAGAACTTTGT       | miRNA | hsa-mir-148a   |
| t0063633 | 18 | 2 TGTA AACATCCCCGACTG       | miRNA | hsa-mir-30d    |
| t0063950 | 21 | 2 CTGAGATGAAGCACTGTAGCT     | miRNA | hsa-mir-143    |
| t0064070 | 20 | 2 GAGGAGCTCACAGTCTAGTA      | miRNA | hsa-mir-151a   |
| t0064355 | 20 | 2 TGGCACTGGTAGAATTCCT       | miRNA | hsa-mir-183    |
| t0064429 | 23 | 2 CGGGGCCGTAGCACTGTCTGAGA   | miRNA | hsa-mir-128-1  |
| t0064611 | 20 | 2 ACTGCTGAGCTAGCACTTCC      | miRNA | hsa-mir-93     |
| t0064616 | 21 | 2 ACTGCCCTAAATGCCCTTCT      | miRNA | hsa-mir-18b    |
| t0064934 | 23 | 2 AACCCGTAGATCCGAACCTGTGG   | miRNA | hsa-mir-100    |
| t0065026 | 22 | 2 TTGGGGAAACGGCCGCTGAGTG    | miRNA | hsa-mir-2110   |
| t0065191 | 19 | 2 CGCATCCCCTAGGGCATTG       | miRNA | hsa-mir-324    |
| t0065303 | 20 | 2 TTAAGACTTGCAGTGATGTT      | miRNA | hsa-mir-499a   |
| t0065446 | 21 | 2 TGTTGTACTTTTTTTTTTTGTT    | miRNA | hsa-mir-3613   |
| t0065772 | 23 | 2 ATTGCACTTGTCCCGGCCTGTTG   | miRNA | hsa-mir-92a-1  |
| t0065788 | 18 | 2 ACTGGACTTGGAGTCAGA        | miRNA | hsa-mir-378d-1 |
| t0065815 | 25 | 2 CTGTAAACATCCTTGACTGGAAGCT | miRNA | hsa-mir-30e    |
| t0066113 | 21 | 2 CCAGTATTA ACTGTGCTGCTG    | miRNA | hsa-mir-16-1   |
| t0066616 | 23 | 2 TGTA AACATCCTACACTCAGCTG  | miRNA | hsa-mir-30b    |
| t0066627 | 22 | 2 GAAGAACTGTTGCATTTGCCCT    | miRNA | hsa-mir-4511   |
| t0066652 | 24 | 2 TACCATTGCATATCGGAGTTGTG   | miRNA | hsa-mir-660    |
| t0067186 | 21 | 2 AAGCAGCATTGTACAGGGCTA     | miRNA | hsa-mir-107    |
| t0067402 | 19 | 2 AACCGTGGCTTTCGATTGT       | miRNA | hsa-mir-132    |
| t0067558 | 20 | 2 TTTAGATAACAGTATTACA       | miRNA | hsa-mir-3942   |
| t0067573 | 20 | 2 TTTAGGATAAGCTTGACTTT      | miRNA | hsa-mir-651    |
| t0067746 | 23 | 2 AGCGCGGGCTGAGCGCTGCCAGT   | miRNA | hsa-mir-2277   |
| t0067963 | 22 | 2 CTAAGTGCTGACAGTGCAGAT     | miRNA | hsa-mir-106b   |
| t0068136 | 23 | 2 TTTGGGACTGATCTTGATGTCTG   | miRNA | hsa-mir-3913-2 |
| t0068257 | 19 | 2 CTGCCAGTTGAAGAACTGT       | miRNA | hsa-mir-22     |
| t0068587 | 19 | 2 CTGAGGTAGTAGTTTGTGC       | miRNA | hsa-let-7i     |



|          |    |                              |       |                |
|----------|----|------------------------------|-------|----------------|
| t0068685 | 19 | 2 CTGTGCGTGTGACAGCGGC        | miRNA | hsa-mir-210    |
| t0069338 | 22 | 2 TTGAGGTAGTAGTTGTATAGT      | miRNA | hsa-let-7a-2   |
| t0069496 | 19 | 2 TGGCAATGGTAGAACTCAC        | miRNA | hsa-mir-182    |
| t0069756 | 20 | 2 ATAGATCTGGATTGGAACCC       | miRNA | hsa-mir-607    |
| t0069934 | 20 | 2 ACCTCCTGTGTGCATGGATT       | miRNA | hsa-mir-660    |
| t0070301 | 21 | 2 CTCTACTGTAGTATGGGCACT      | miRNA | hsa-mir-20b    |
| t0070459 | 20 | 2 GTGCCTGAGGGAGTAAGAGC       | miRNA | hsa-mir-550a-2 |
| t0070578 | 19 | 2 AGTGTGCGGAAATGCTTCT        | miRNA | hsa-mir-147b   |
| t0070579 | 19 | 2 CAGGCCATATTGTGCTGCC        | miRNA | hsa-mir-15a    |
| t0070586 | 22 | 2 GAATCTGAGAAGGCGCACAAAGG    | miRNA | hsa-mir-3200   |
| t0070589 | 23 | 2 GTAGAGGAGATGGCGCAGGGGAC    | miRNA | hsa-mir-877    |
| t0070601 | 21 | 2 CTAGCACCATCTGAAATCGGT      | miRNA | hsa-mir-29a    |
| t0070713 | 19 | 2 GTACTGTGATAACTGAAGA        | miRNA | hsa-mir-101-2  |
| t0070878 | 20 | 2 CCCATCCGCGCTCTGACTCT       | miRNA | hsa-mir-937    |
| t0071433 | 18 | 2 TGACCTATGAATTGACAG         | miRNA | hsa-mir-215    |
| t0071577 | 22 | 2 GAATGTTGCTCGGTGAACCCCT     | miRNA | hsa-mir-409    |
| t0071652 | 22 | 2 GTAGCAGCACATAATGGTTTGT     | miRNA | hsa-mir-15a    |
| t0072118 | 22 | 2 GTAGCTTATCAGACTGATGTTG     | miRNA | hsa-mir-21     |
| t0072126 | 25 | 2 AGCTACATCTGGCTACTGGGTCTCT  | miRNA | hsa-mir-222    |
| t0072148 | 21 | 2 TAACTGTACAGGCCACTGCCT      | miRNA | hsa-let-7g     |
| t0072323 | 21 | 2 GTGAATTACCGAAGGGCCATA      | miRNA | hsa-mir-183    |
| t0072336 | 21 | 2 TACAGTAGTCTGCACATTGGT      | miRNA | hsa-mir-199b   |
| t0072662 | 20 | 2 AGGGGCAGAGAGCGAGACTT       | miRNA | hsa-mir-423    |
| t0072665 | 19 | 2 GCAATGGTAGAACTCACAC        | miRNA | hsa-mir-182    |
| t0072673 | 20 | 2 TGAGGTAGTAGGTTGTATGG       | miRNA | hsa-let-7c     |
| t0072676 | 19 | 2 AACAGACATTAATTGGGCG        | miRNA | hsa-mir-421    |
| t0072689 | 20 | 2 GTGTCAGTTTGTCAAATACC       | miRNA | hsa-mir-223    |
| t0072730 | 27 | 2 ATACAACCTGATAAGTGTATAGCACT | miRNA | hsa-mir-374a   |
| t0073384 | 19 | 2 AAAAGTACTTGCGGATTTT        | miRNA | hsa-mir-548k   |
| t0073612 | 21 | 2 AAAACCGTCTAGTTACAGTTG      | miRNA | hsa-mir-1537   |
| t0073697 | 24 | 2 GTATTGCACTTGTCGCGCCTGTT    | miRNA | hsa-mir-92a-1  |
| t0073780 | 21 | 2 CAAAAAAAAAAGCCCAACCT       | miRNA | hsa-mir-3613   |
| t0073886 | 19 | 2 TTTCAGTCGGATGTTTACA        | miRNA | hsa-mir-30e    |
| t0073961 | 22 | 2 CAGTTATCACAGTGCTGATGCT     | miRNA | hsa-mir-101-1  |
| t0074171 | 21 | 2 TGCACGGCACTGGGACACGT       | miRNA | hsa-mir-3177   |
| t0074324 | 20 | 2 TCCTCCTGCCCTCCTTGCTG       | miRNA | hsa-mir-1976   |
| t0074634 | 18 | 2 TCACAGTGAACCGGTCTC         | miRNA | hsa-mir-128-2  |
| t0074910 | 19 | 2 TCCCTGAGACCCTAACTTG        | miRNA | hsa-mir-125b-2 |
| t0075062 | 22 | 2 GCAGTGCAATGTTAAAAGGGCA     | miRNA | hsa-mir-130a   |
| t0075138 | 22 | 2 AGGAGCTCAACAGATGCCTGTT     | miRNA | hsa-mir-3139   |
| t0075214 | 22 | 2 TAGTACCAGTACCTTGTTCA       | miRNA | hsa-mir-624    |
| t0075479 | 23 | 2 TTACACAGCTGGACAGAGGCACG    | miRNA | hsa-mir-4672   |
| t0075500 | 20 | 2 CAAGTAATTCAGGATAGGTT       | miRNA | hsa-mir-26b    |
| t0075544 | 24 | 2 TGTGCAAATCCATGCAAACTGAT    | miRNA | hsa-mir-19b-2  |
| t0075662 | 23 | 2 TCAGAACAAATGCCGGTCCAG      | miRNA | hsa-mir-589    |
| t0076001 | 19 | 2 CCCTCTCACCCTGCCCTC         | miRNA | hsa-mir-1229   |
| t0076203 | 24 | 2 TCTAGCAGCACGTAATATTGGCG    | miRNA | hsa-mir-16-2   |
| t0076324 | 22 | 2 CAGCATTGTACAGGGCTATGAA     | miRNA | hsa-mir-103a-1 |
| t0076606 | 19 | 2 TCACAGTGGCTAAGTTCTG        | miRNA | hsa-mir-27b    |
| t0076628 | 24 | 2 TGTGCAAATCTATGCAAACTGAT    | miRNA | hsa-mir-19a    |
| t0076851 | 20 | 2 CAACAGACATTAATTGGGCG       | miRNA | hsa-mir-421    |
| t0076928 | 20 | 2 CCATAAAGTAGAAAGCACTA       | miRNA | hsa-mir-142    |
| t0076999 | 22 | 2 TTCTAGTAAGAGTGGCAGTCGA     | miRNA | hsa-mir-628    |
| t0077156 | 21 | 2 TATAAAATGAGGGCAGTAAGA      | miRNA | hsa-mir-3163   |
| t0077329 | 22 | 2 GAGGTAGTAGATTGTATAGTTG     | miRNA | hsa-let-7f-1   |
| t0077549 | 18 | 2 TATATATATATATGTACG         | miRNA | hsa-mir-1277   |
| t0077804 | 18 | 2 GGTAGTAGTTTGTGCTGT         | miRNA | hsa-let-7i     |
| t0078241 | 19 | 2 TGCACCTGTCTCGGTCTGA        | miRNA | hsa-mir-25     |

|          |    |                               |       |                |
|----------|----|-------------------------------|-------|----------------|
| t0078279 | 20 | 2 TAGTACTGTGCATATCATCT        | miRNA | hsa-mir-1278   |
| t0078293 | 22 | 2 GAAACCGTTACCATTACTGAGT      | miRNA | hsa-mir-451a   |
| t0080041 | 23 | 2 GTAAACATCCCCGACTGGAAGCT     | miRNA | hsa-mir-30d    |
| t0080137 | 18 | 2 ACACGATCACTCCCGTTG          | miRNA | hsa-mir-425    |
| t0080457 | 24 | 2 ACCACAGGGTAGAACCACGGACAG    | miRNA | hsa-mir-140    |
| t0080639 | 20 | 2 AAAGACATAGGATAGAGTCA        | miRNA | hsa-mir-641    |
| t0080770 | 22 | 2 ACCCATTGCATATCGGAGTTGT      | miRNA | hsa-mir-660    |
| t0081420 | 23 | 2 CTGGAGATATGGAAGAGCTGTGT     | miRNA | hsa-mir-1270-2 |
| t0081680 | 22 | 2 TATAAAATGAGGGCAGTAAGAC      | miRNA | hsa-mir-3163   |
| t0081694 | 23 | 2 TTAGCAGCACGTAAATATTGGCG     | miRNA | hsa-mir-16-1   |
| t0081961 | 22 | 2 CTGCTGAGCTAGCACTTCCCGA      | miRNA | hsa-mir-93     |
| t0082037 | 21 | 2 TTCTGCCTCTGTCCAGGTCCT       | miRNA | hsa-mir-5001   |
| t0082083 | 24 | 2 CTGAGGGGCAGAGAGCGAGACTTT    | miRNA | hsa-mir-423    |
| t0082507 | 27 | 2 AAACCGTTACCATTACTGAGTTTAGTA | miRNA | hsa-mir-451a   |
| t0082539 | 22 | 2 GCAGCATTGTACAGGGCTATGA      | miRNA | hsa-mir-103a-1 |
| t0082664 | 18 | 2 CTGCGCAAGCTACTGCCT          | miRNA | hsa-let-7i     |
| t0082795 | 24 | 2 TGTTCCCTCTGTCTCCCAGACTCTG   | miRNA | hsa-mir-4326   |
| t0082894 | 24 | 2 TGAGGTAGTAGATTGTATAGTTTT    | miRNA | hsa-let-7f-2   |
| t0082900 | 21 | 2 GAGGTAGTAGTTTGTACAGTT       | miRNA | hsa-let-7g     |
| t0083067 | 21 | 2 CAGTAGTCTGCACATTGGTTA       | miRNA | hsa-mir-199b   |
| t0083071 | 23 | 2 GCATTGCACTTGTCTCGGTCTGA     | miRNA | hsa-mir-25     |
| t0083226 | 20 | 2 GGGGCAGCTCAGTACAGGAT        | miRNA | hsa-mir-486    |
| t0083882 | 18 | 2 CATTATTACTTTTGGTAC          | miRNA | hsa-mir-126    |
| t0084019 | 20 | 2 ACAAAAAAAAAAGCCCAACC        | miRNA | hsa-mir-3613   |
| t0084059 | 19 | 2 TCAAAGTGCTTACAGTGCA         | miRNA | hsa-mir-17     |
| t0084274 | 20 | 2 AACCACTGACCGTTGACTGT        | miRNA | hsa-mir-181a-2 |
| t0084517 | 21 | 2 CAGTACTGTGATAACTGAAGA       | miRNA | hsa-mir-101-2  |
| t0084607 | 22 | 2 AAAGACATAGGATAGAGTCACC      | miRNA | hsa-mir-641    |
| t0084995 | 22 | 2 ATCTCCAGTATTAAGTGTGCTG      | miRNA | hsa-mir-16-1   |
| t0085000 | 22 | 2 TTCTAGGTATGGTCCCAGGGAT      | miRNA | hsa-mir-331    |
| t0085862 | 21 | 2 TCCCTGAGACCCTAAGTTGTG       | miRNA | hsa-mir-125b-2 |
| t0086092 | 21 | 2 ACTCCAGCCCCACAGCCTCAG       | miRNA | hsa-mir-766    |
| t0086195 | 21 | 2 TTATCAGATTGTATTGTAATT       | miRNA | hsa-mir-374a   |
| t0086700 | 21 | 2 TTCCTGCTGAACTGAGCCAGT       | miRNA | hsa-mir-3074   |
| t0086915 | 20 | 2 AGCTACATCTGGCTACTGGG        | miRNA | hsa-mir-222    |
| t0087189 | 22 | 2 CGGGGCCGTAGCACTGTCTGAG      | miRNA | hsa-mir-128-1  |
| t0087224 | 19 | 2 ACCGTGGCTTTCGATTGTT         | miRNA | hsa-mir-132    |
| t0087312 | 20 | 2 AAAGTGCTTATAGTGCAGGT        | miRNA | hsa-mir-20a    |
| t0087321 | 22 | 2 AATGCACCTGGGCAAGGATTCT      | miRNA | hsa-mir-500a   |
| t0087600 | 22 | 2 AGTGCAATAGTATTGTCAAAGC      | miRNA | hsa-mir-301a   |
| t0087718 | 19 | 2 GTATGGCACTGGTAGAATT         | miRNA | hsa-mir-183    |
| t0088153 | 23 | 2 CATAAAGTAGAAAGCACTACTAA     | miRNA | hsa-mir-142    |
| t0088241 | 20 | 2 CACGCTCATGCACACACCCA        | miRNA | hsa-mir-574    |
| t0088444 | 22 | 2 AGCCTGGAAGCTGGAGCCTGCA      | miRNA | hsa-mir-1254-2 |
| t0089131 | 20 | 2 TCTTTTCTTTGAGACTCACT        | miRNA | hsa-mir-627    |
| t0089742 | 20 | 2 TGTGAGGTTGGCATTGTTGT        | miRNA | hsa-mir-1294   |
| t0090008 | 21 | 2 CTCGTACCGTGAGTAATAATG       | miRNA | hsa-mir-126    |
| t0090120 | 22 | 2 TAGGTAGTTTCTGTGTTGGG        | miRNA | hsa-mir-196b   |
| t0090182 | 23 | 2 TAGCAGCACATCATGGTTTACAT     | miRNA | hsa-mir-15b    |
| t0090315 | 20 | 2 AGGGCCCCCCTCAATCCTG         | miRNA | hsa-mir-296    |
| t0091004 | 19 | 2 ACCGCACTGTGGGTACTTG         | miRNA | hsa-mir-106b   |
| t0091045 | 22 | 2 AGCAGCACGTAAATATTGGCGT      | miRNA | hsa-mir-16-2   |
| t0091492 | 22 | 2 CCTGGACACCGCTCAGCCGGCC      | miRNA | hsa-mir-4638   |
| t0091580 | 19 | 2 TCTCTCGGCTCCTCGCGGC         | miRNA | hsa-mir-3615   |
| t0091596 | 23 | 2 TGTCAGTTTGTCAAATACCCCAA     | miRNA | hsa-mir-223    |
| t0091650 | 23 | 2 ATTATTACTTTTGGTACGCGCTG     | miRNA | hsa-mir-126    |
| t0091667 | 19 | 2 GAGGAGCTCACAGTCTAGT         | miRNA | hsa-mir-151a   |
| t0091822 | 19 | 2 ACAGGGTAGAACCACGGAC         | miRNA | hsa-mir-140    |

|          |    |                              |       |                |
|----------|----|------------------------------|-------|----------------|
| t0091840 | 19 | 2 AGGCTCAGTCCCCTCCCGA        | miRNA | hsa-mir-484    |
| t0092415 | 24 | 2 TCCCCAGGTGTGATTCTGATTTG    | miRNA | hsa-mir-361    |
| t0092417 | 22 | 2 CTGGGAGAGGGTTGTTTACTCC     | miRNA | hsa-mir-30c-1  |
| t0092924 | 20 | 2 GGTACAGTACTGTGATAACT       | miRNA | hsa-mir-101-2  |
| t0092965 | 23 | 2 TCATATACTGTAAGTTTGCGATG    | miRNA | hsa-mir-144    |
| t0093796 | 21 | 2 TTCTTCTTAGACATGGCAGCT      | miRNA | hsa-mir-4659b  |
| t0093973 | 21 | 2 ATAGGACTCATATAGTGCCAG      | miRNA | hsa-mir-3117   |
| t0094348 | 22 | 2 GTACAAAAGCAATCGCGGTTTT     | miRNA | hsa-mir-548e   |
| t0094392 | 20 | 2 CAAAAGTAATTGCGGTCTTT       | miRNA | hsa-mir-548ap  |
| t0094438 | 22 | 2 CAACAATCACAGTCTGCCATA      | miRNA | hsa-mir-7-1    |
| t0094966 | 19 | 2 ATATCATCATATACTGTAA        | miRNA | hsa-mir-144    |
| t0095095 | 20 | 2 TGCCTGAGGGAGTAAGAGCC       | miRNA | hsa-mir-550a-2 |
| t0095116 | 19 | 2 AAAAGCTGGGTTGAGAGGG        | miRNA | hsa-mir-320c-2 |
| t0095145 | 23 | 2 AGGACCTTCCCTGAACCAAGGAA    | miRNA | hsa-mir-659    |
| t0095183 | 20 | 2 ATTGCACTCGTCCCGGCCTC       | miRNA | hsa-mir-92b    |
| t0095622 | 22 | 2 CCGCACTGTGGGTACTTGCTGC     | miRNA | hsa-mir-106b   |
| t0095727 | 25 | 2 TCAAAGTGCTTACAGTGCAGGTAGT  | miRNA | hsa-mir-17     |
| t0095967 | 22 | 2 TACAGTATAGATGATGTACTIONAG  | miRNA | hsa-mir-144    |
| t0096165 | 21 | 2 AAAGTGCTTATAGTGCAAGTA      | miRNA | hsa-mir-20a    |
| t0096284 | 22 | 1 ATTGTCAGGTAGTGATAGGATT     | miRNA | hsa-mir-4999   |
| t0096399 | 24 | 1 TGTCAGTTTGTCAAATACCCCAAG   | miRNA | hsa-mir-223    |
| t0096481 | 23 | 1 AGAATTGCGTTTGGACAATCAGT    | miRNA | hsa-mir-2964a  |
| t0097095 | 20 | 1 ACAACAGTGCCAACCTCACA       | miRNA | hsa-mir-1294   |
| t0097546 | 19 | 1 TACTGCCCTAAGTGCTCCT        | miRNA | hsa-mir-18a    |
| t0097754 | 25 | 1 CTGTAAACATCCTACACTCTCAGCT  | miRNA | hsa-mir-30c-2  |
| t0097985 | 19 | 1 AGTGCAATGTTAAAAGGGC        | miRNA | hsa-mir-130a   |
| t0098758 | 22 | 1 TCTGTATTCTCCTTGCCTGCA      | miRNA | hsa-mir-4742   |
| t0098873 | 24 | 1 TGAAGTTCTGTTATACTCAGGC     | miRNA | hsa-mir-148b   |
| t0099340 | 20 | 1 CAGTGGTTTTACCCTATGGT       | miRNA | hsa-mir-140    |
| t0099469 | 18 | 1 TGTCAGTTTGTCAAATAC         | miRNA | hsa-mir-223    |
| t0099740 | 23 | 1 ATCAGGGCTTGTGGAATGGGAAG    | miRNA | hsa-mir-3127   |
| t0100045 | 22 | 1 CTGTACTIONGAGCTGCCCCGAGGC  | miRNA | hsa-mir-486    |
| t0100113 | 19 | 1 ATGACACGATCACTCCCGT        | miRNA | hsa-mir-425    |
| t0100309 | 19 | 1 CAGTACTGTGATACTIONGAA      | miRNA | hsa-mir-101-2  |
| t0100573 | 22 | 1 CACACAGGTTATAGATCTGGAT     | miRNA | hsa-mir-607    |
| t0100804 | 22 | 1 ACCCTGTAGAACCGAATTTGTG     | miRNA | hsa-mir-10b    |
| t0100813 | 20 | 1 AGCAGCACATAATGGTTTGT       | miRNA | hsa-mir-15a    |
| t0100901 | 21 | 1 CTATACAATCTATTGCCTTCC      | miRNA | hsa-let-7f-1   |
| t0101573 | 22 | 1 TTAGCCAATTGTCCATCTTTAG     | miRNA | hsa-mir-4662a  |
| t0101941 | 19 | 1 TGAGGTAGGAGTTGTATA         | miRNA | hsa-let-7e     |
| t0101985 | 21 | 1 TGGCCCGGCGACGTCTCACGG      | miRNA | hsa-mir-4745   |
| t0102475 | 20 | 1 GTCAGTTTGTCAAATACCC        | miRNA | hsa-mir-223    |
| t0102933 | 24 | 1 AAGCAGCATTGTACAGGGCTATGA   | miRNA | hsa-mir-103a-1 |
| t0103264 | 22 | 1 ACTACAGTATAGATGATGTACTION  | miRNA | hsa-mir-144    |
| t0103331 | 20 | 1 CAAAACGTGAGGCGCTGCTA       | miRNA | hsa-mir-424    |
| t0103334 | 21 | 1 TAAATAGAGTAGGCAAAGGAC      | miRNA | hsa-mir-3121   |
| t0103387 | 19 | 1 TACCGTGAGTAATAATGCG        | miRNA | hsa-mir-126    |
| t0103690 | 25 | 1 TGATATGTTTGTATATATTAGGTTGT | miRNA | hsa-mir-190a   |
| t0104155 | 20 | 1 AACCCGTAGATCCGATCTTG       | miRNA | hsa-mir-99a    |
| t0104343 | 18 | 1 ACATTCATTGCTGTCCGGT        | miRNA | hsa-mir-181b-2 |
| t0104929 | 19 | 1 CTCGGCGTGGCGTCCGGTCC       | miRNA | hsa-mir-1307   |
| t0105833 | 22 | 1 TTTGGCACTAGCACATTTTTGC     | miRNA | hsa-mir-96     |
| t0106275 | 20 | 1 AATGGTAATGGTTCTCTTGC       | miRNA | hsa-mir-451a   |
| t0106653 | 19 | 1 AGTACTGTGATACTIONGAAG      | miRNA | hsa-mir-101-2  |
| t0107382 | 19 | 1 TTCACCACCTTCTCCACCC        | miRNA | hsa-mir-197    |
| t0107866 | 22 | 1 CCCTGACCTGTCCCTGTTCTGCC    | miRNA | hsa-mir-4732   |
| t0108141 | 18 | 1 GATATCATCATATACTIONGT      | miRNA | hsa-mir-144    |
| t0108506 | 21 | 1 GACTATAGAACTIONTTCCCCCTC   | miRNA | hsa-mir-625    |

|          |    |                            |       |                |
|----------|----|----------------------------|-------|----------------|
| t0108735 | 21 | 1 ATGGAAAGACTTTGCCACTCT    | miRNA | hsa-mir-3688-2 |
| t0108774 | 23 | 1 AGCTTATCAGACTGATGTTGACT  | miRNA | hsa-mir-21     |
| t0109174 | 22 | 1 TCGACCGGACCTCGACCGGCTC   | miRNA | hsa-mir-1307   |
| t0109312 | 18 | 1 TTATAAAGCAATGAGACT       | miRNA | hsa-mir-340    |
| t0109336 | 22 | 1 AGGTAGTAGATTGTATAGTTGT   | miRNA | hsa-let-7f-1   |
| t0109922 | 18 | 1 TCGAATCCCAGCGGTGCC       | miRNA | hsa-mir-3676   |
| t0109926 | 20 | 1 AAAGACTCTGCAAGATGCCT     | miRNA | hsa-mir-4432   |
| t0110469 | 23 | 1 ACATATGGAAAGACTTTGCCACT  | miRNA | hsa-mir-3688-2 |
| t0110522 | 21 | 1 CTAGATTGTGAGCTCCTGGAG    | miRNA | hsa-mir-28     |
| t0110727 | 20 | 1 TGAGGAGATCGTCGAGGTTG     | miRNA | hsa-mir-3150b  |
| t0110988 | 22 | 1 CCACTGCCCCAGGTGCTGCTGG   | miRNA | hsa-mir-324    |
| t0111500 | 21 | 1 AACTCTGACCCCTTAGGTTGA    | miRNA | hsa-mir-4714   |
| t0111655 | 20 | 1 TTACCATTACTGAGTTTAGT     | miRNA | hsa-mir-451a   |
| t0111666 | 22 | 1 AAAAGTTATTGTGGTTTTTGTCT  | miRNA | hsa-mir-548ac  |
| t0111669 | 21 | 1 AAAAGTACTTGCGGATTTTGC    | miRNA | hsa-mir-548k   |
| t0112003 | 22 | 1 CAAGCTTGTATCTATAGGTATG   | miRNA | hsa-mir-100    |
| t0112112 | 21 | 1 GTGCATATTTACTTTAGGATG    | miRNA | hsa-mir-559    |
| t0112420 | 18 | 1 CAATGGTAGAACTCACAC       | miRNA | hsa-mir-182    |
| t0113069 | 20 | 1 TCTGGCTGTTGTGGTGTGCA     | miRNA | hsa-mir-3064   |
| t0113155 | 19 | 1 TTTCAGTCAGATGTTTGCT      | miRNA | hsa-mir-30d    |
| t0113522 | 24 | 1 CAGTGCAATGATATTGTCAAAGCA | miRNA | hsa-mir-301b   |
| t0114035 | 20 | 1 CTAAGTCTGAGCTAGCACTT     | miRNA | hsa-mir-93     |
| t0114476 | 20 | 1 AACCGAATCCCAAAGCAGC      | miRNA | hsa-mir-191    |
| t0114505 | 21 | 1 TTTCCGGCTCGCGTGGGTGTG    | miRNA | hsa-mir-1180   |
| t0115429 | 24 | 1 TAATCCTTGCTACCTGGGTGAGAG | miRNA | hsa-mir-500b   |
| t0115812 | 18 | 1 GGTAGTAGTTGCATAGT        | miRNA | hsa-let-7d     |
| t0116383 | 22 | 1 TGTCTCTAGGGCCTGCAGTCT    | miRNA | hsa-mir-3909   |
| t0116603 | 21 | 1 ATGACCTATGAATTGACAGAC    | miRNA | hsa-mir-215    |
| t0116714 | 20 | 1 TGAATTACCGAAGGGCCATA     | miRNA | hsa-mir-183    |
| t0117686 | 24 | 1 GGGAGCCAGGAAGTATTGATGTTT | miRNA | hsa-mir-505    |
| t0117732 | 22 | 1 TACCCAGTCTCCGGTGCAGCCT   | miRNA | hsa-mir-3130-2 |
| t0117995 | 19 | 1 AAGTAATTCAGGATAGGTT      | miRNA | hsa-mir-26b    |
| t0118010 | 23 | 1 TGGAAGACTAGTGATTTTGTGTT  | miRNA | hsa-mir-7-3    |
| t0118259 | 20 | 1 CGGCGGGGACGGCGATTGGT     | miRNA | hsa-mir-1908   |
| t0118541 | 23 | 1 AATCCTTGCTATCTGGGTGCTAG  | miRNA | hsa-mir-502    |
| t0118923 | 20 | 1 GCAGCACATCATGTTTACA      | miRNA | hsa-mir-15b    |
| t0118968 | 21 | 1 TGACCTATGAATTGACAGACA    | miRNA | hsa-mir-215    |
| t0119413 | 21 | 1 TAGCAGCACAGAAATATTGGC    | miRNA | hsa-mir-195    |
| t0120578 | 20 | 1 ATTTAGGCGTCAGACTACCT     | miRNA | hsa-mir-5696   |
| t0120627 | 19 | 1 CTCGGTCTGAGGCCCTCA       | miRNA | hsa-mir-423    |
| t0120919 | 20 | 1 ACCATCGACCGTTGAGTGGA     | miRNA | hsa-mir-181c   |
| t0120973 | 21 | 1 TAACTATACGACCTGCTGCCT    | miRNA | hsa-let-7d     |
| t0121012 | 19 | 1 CTTATCAGACTGATGTTGA      | miRNA | hsa-mir-21     |
| t0121199 | 20 | 1 AGTGCTCATAGTGCAGGTAG     | miRNA | hsa-mir-20b    |
| t0121522 | 21 | 1 AGAGGAGATGGCGCAGGGGAC    | miRNA | hsa-mir-877    |
| t0121540 | 19 | 1 AGGTGACTGTCCTATGTCT      | miRNA | hsa-mir-641    |
| t0121936 | 23 | 1 AAAGTCTACTTGTCTTCTGAGT   | miRNA | hsa-mir-618    |
| t0121998 | 20 | 1 AGATAACTATAACAACCTACT    | miRNA | hsa-let-7b     |
| t0122553 | 22 | 1 CGGCCCCACGCACCAGGGTAAG   | miRNA | hsa-mir-874    |
| t0122745 | 22 | 1 TTTTTCATTATTGCTCCTGACC   | miRNA | hsa-mir-335    |
| t0122824 | 20 | 1 CCCTGTGGACTCAGTTCTGG     | miRNA | hsa-mir-146b   |
| t0123041 | 23 | 1 CAACACCAGTCCGATGGGCTGTCT | miRNA | hsa-mir-21     |
| t0123139 | 21 | 1 TCAGCAAACATTTATTGTGTG    | miRNA | hsa-mir-545    |
| t0123418 | 19 | 1 AAAGTGCTGACAGTGCAGA      | miRNA | hsa-mir-106b   |
| t0123569 | 21 | 1 TTTTAGAGACGGGGTCTTGCT    | miRNA | hsa-mir-1303   |
| t0123805 | 21 | 1 ATCACATTGCCAGGGATTACC    | miRNA | hsa-mir-23b    |
| t0124147 | 20 | 1 CTATACAGTCTACTGTCTTT     | miRNA | hsa-let-7f-2   |
| t0124375 | 18 | 1 TGTACTTTTTTTTTTGT        | miRNA | hsa-mir-3613   |

|          |    |                                 |       |                |
|----------|----|---------------------------------|-------|----------------|
| t0124866 | 19 | 1 ACCACAGGGTAGAACCACG           | miRNA | hsa-mir-140    |
| t0125215 | 23 | 1 GAAAAGCTGGGTTGAGAGGGCAA       | miRNA | hsa-mir-320b-2 |
| t0125667 | 24 | 1 TGACCTATGAATTGACAGCCAGTG      | miRNA | hsa-mir-192    |
| t0125719 | 21 | 1 CTGTGAGGTTGGCATTGTTGT         | miRNA | hsa-mir-1294   |
| t0125766 | 21 | 1 TGTTCTGCTGAACTGAGCCA          | miRNA | hsa-mir-3074   |
| t0125963 | 21 | 1 ACAGGGTAGAACCACGGACAG         | miRNA | hsa-mir-140    |
| t0126171 | 19 | 1 TCGTACCGTGAGTAATAAT           | miRNA | hsa-mir-126    |
| t0126321 | 21 | 1 TCCCTGTCCTCCAGGAGCTCA         | miRNA | hsa-mir-339    |
| t0126790 | 20 | 1 CGCATAATATGGACATGTTA          | miRNA | hsa-mir-3912   |
| t0126918 | 22 | 1 TAGAGGAGATGGCGCAGGGGAC        | miRNA | hsa-mir-877    |
| t0127298 | 22 | 1 CAGTGCAATGATATTGTCAAAG        | miRNA | hsa-mir-301b   |
| t0128569 | 21 | 1 CCGGTCCCAGGAGAACCTGCA         | miRNA | hsa-mir-4746   |
| t0129068 | 22 | 1 ACCGTTACCATTACTGAGTTTA        | miRNA | hsa-mir-451a   |
| t0129567 | 23 | 1 CCTCCGTGTTACCTGTCCTCTAG       | miRNA | hsa-mir-3605   |
| t0129598 | 23 | 1 CCACTAGATTGTGAGCTCCTGGA       | miRNA | hsa-mir-28     |
| t0129601 | 21 | 1 CAGTTATCACAGTGCTGATGC         | miRNA | hsa-mir-101-1  |
| t0129691 | 23 | 1 TGTTCTCTGTCTCCCAGACTCT        | miRNA | hsa-mir-4326   |
| t0129931 | 21 | 1 AGGCTGGTGCAAAAGTAATGG         | miRNA | hsa-mir-548q   |
| t0130045 | 22 | 1 CAATGTTGGAATCCTCGCTAGA        | miRNA | hsa-mir-4781   |
| t0130137 | 23 | 1 TCGGTTATCATGGTACCGATGCT       | miRNA | hsa-mir-101-2  |
| t0130363 | 24 | 1 ATCCTGTAAGTACTGAGCTGCCCGAGG   | miRNA | hsa-mir-486    |
| t0130703 | 19 | 1 TCCCTGTCCTCCAGGAGCT           | miRNA | hsa-mir-339    |
| t0131001 | 21 | 1 ATATGGAAAGACTTTGCCACT         | miRNA | hsa-mir-3688-2 |
| t0131221 | 20 | 1 GAATGGCGCCACTAGGGTTG          | miRNA | hsa-mir-652    |
| t0131239 | 23 | 1 TAGTGTTTCTACTTTATGGATG        | miRNA | hsa-mir-142    |
| t0131427 | 25 | 1 TTTTGGCAATGGTAGAACTCACACT     | miRNA | hsa-mir-182    |
| t0131854 | 20 | 1 TAAGGGGTGTATGGCAGATG          | miRNA | hsa-mir-3936   |
| t0132379 | 22 | 1 TTCACCACCTTCTCCACCCAGC        | miRNA | hsa-mir-197    |
| t0132492 | 21 | 1 AGGGCCCCCCTCAATCCTGT          | miRNA | hsa-mir-296    |
| t0132564 | 21 | 1 TTTCTATTTCTCAGTGGGGCT         | miRNA | hsa-mir-4482-2 |
| t0133516 | 18 | 1 ATGGCGCCACTAGGGTTG            | miRNA | hsa-mir-652    |
| t0133791 | 25 | 1 AATCTGAGAAGGCGCACAAGGTTTG     | miRNA | hsa-mir-3200   |
| t0133874 | 19 | 1 GCTGCGCTTGATTTCGTC            | miRNA | hsa-mir-191    |
| t0134063 | 18 | 1 ACCACTGACCGTTGACTG            | miRNA | hsa-mir-181a-2 |
| t0134324 | 23 | 1 TTAGGGTCATACCCCATCTTGA        | miRNA | hsa-let-7f-2   |
| t0134328 | 23 | 1 CAAAGACTGCAATTACTTTTGGC       | miRNA | hsa-mir-548u   |
| t0135252 | 21 | 1 AACAAATCACAGTCTGCCATA         | miRNA | hsa-mir-7-1    |
| t0135377 | 21 | 1 CAAAACGTGAGGCGCTGCTAT         | miRNA | hsa-mir-424    |
| t0135921 | 19 | 1 CACTGTTTCACCACTGGCT           | miRNA | hsa-mir-4676   |
| t0137416 | 18 | 1 TGTA AACATCCTACACTC           | miRNA | hsa-mir-30c-1  |
| t0137531 | 18 | 1 CTGGAGATATGGAAGAGC            | miRNA | hsa-mir-1270-2 |
| t0137710 | 18 | 1 TAATGGTAATGGTTCTCT            | miRNA | hsa-mir-451a   |
| t0137820 | 24 | 1 CAGTGCAATGTTAAAAGGGCATTG      | miRNA | hsa-mir-130a   |
| t0138816 | 21 | 1 AACGCATAATATGGACATGTT         | miRNA | hsa-mir-3912   |
| t0138830 | 20 | 1 ACACCAATATACTGTGCTG           | miRNA | hsa-mir-16-2   |
| t0139077 | 20 | 1 GCTGCGCTTGATTTCGTC            | miRNA | hsa-mir-191    |
| t0139487 | 29 | 1 GATATCATCATATACTGTAAGTTTGGCAT | miRNA | hsa-mir-144    |
| t0139580 | 24 | 1 AACCGTTACCATTACTGAGTTTAG      | miRNA | hsa-mir-451a   |
| t0140447 | 22 | 1 TAATCCTTGCTATCTGGGTGCT        | miRNA | hsa-mir-502    |
| t0140458 | 20 | 1 TATGGTTTGCCTGGGACTGA          | miRNA | hsa-mir-584    |
| t0140476 | 23 | 1 GGGGTGCTATCTGTGATTGAGGG       | miRNA | hsa-mir-342    |
| t0140661 | 20 | 1 TCTGCCTCTGTCCAGTCCCT          | miRNA | hsa-mir-5001   |
| t0141033 | 20 | 1 GCCCTGTGGACTCAGTTCTG          | miRNA | hsa-mir-146b   |
| t0141577 | 19 | 1 AAAAGTATTTGCGGGTTTT           | miRNA | hsa-mir-548l   |
| t0141821 | 19 | 1 AGGTAGTAGTTTGTGCTGT           | miRNA | hsa-let-7i     |
| t0142288 | 23 | 1 ATATCATCATATACTGTAAGTTT       | miRNA | hsa-mir-144    |
| t0142426 | 18 | 1 CAGTTATCACAGTGCTGA            | miRNA | hsa-mir-101-1  |
| t0143003 | 19 | 1 GCAGCATTGTACAGGGCTA           | miRNA | hsa-mir-107    |

|          |    |                              |       |                |
|----------|----|------------------------------|-------|----------------|
| t0143164 | 18 | 1 ATGGTAATGGTTCTCTTG         | miRNA | hsa-mir-451a   |
| t0143224 | 18 | 1 CCGTAGATCCGATCTTGT         | miRNA | hsa-mir-99a    |
| t0143304 | 26 | 1 CGTGTATTTGACAAGCTGAGTTGGAC | miRNA | hsa-mir-223    |
| t0143613 | 22 | 1 AGGGGTGCTATCTGTGATTGAG     | miRNA | hsa-mir-342    |
| t0143673 | 21 | 1 ACTAGATTGTGAGCTCCTGGA      | miRNA | hsa-mir-28     |
| t0143686 | 21 | 1 TCTGGATTGGAACCCAGGGAG      | miRNA | hsa-mir-607    |
| t0143749 | 21 | 1 GAGCGCCTCGACGACAGAGCC      | miRNA | hsa-mir-339    |
| t0143761 | 20 | 1 GTAGTGTTCCTACTTTATG        | miRNA | hsa-mir-142    |
| t0144558 | 18 | 1 TGTA AACATCCTTGACTG        | miRNA | hsa-mir-30e    |
| t0144622 | 21 | 1 AAGGAGCTCACAGTCTATTGA      | miRNA | hsa-mir-28     |
| t0145166 | 21 | 1 AAAA ACTGAGACTACTTTTGC     | miRNA | hsa-mir-548e   |
| t0145353 | 23 | 1 ACTGCATTATGAGCACTTAAAGT    | miRNA | hsa-mir-20a    |
| t0145579 | 23 | 1 TCTAGTAAGAGTGGCAGTCGAAG    | miRNA | hsa-mir-628    |
| t0146196 | 25 | 1 TGTA AACATCCTTGACTGGAAGCTG | miRNA | hsa-mir-30e    |
| t0146290 | 24 | 1 AAAGTGCTGTTCTGTCAGGTAGTG   | miRNA | hsa-mir-93     |
| t0146562 | 18 | 1 ACCTCCTGTGTGCATGGA         | miRNA | hsa-mir-660    |
| t0147397 | 21 | 1 TTGGTGCAA AAGTAATTGTGG     | miRNA | hsa-mir-548ad  |
| t0147527 | 20 | 1 TACGCGCAGACCACAGGATG       | miRNA | hsa-mir-3939   |
| t0148322 | 19 | 1 AATGCACCCGGGCAAGGAT        | miRNA | hsa-mir-501    |
| t0148518 | 19 | 1 AAAACGTGAGGCGCTGCTA        | miRNA | hsa-mir-424    |
| t0148956 | 24 | 1 GGGGTGCTATCTGTGATTGAGGGA   | miRNA | hsa-mir-342    |
| t0149754 | 23 | 1 TCTTTGGTTATCTAGCTGTATGA    | miRNA | hsa-mir-9-3    |
| t0150125 | 20 | 1 TGCCCTGCCTGTTTTCTCCT       | miRNA | hsa-mir-3173   |
| t0150166 | 22 | 1 AGTAAGTGGCACTCTGTCTTCT     | miRNA | hsa-mir-4797   |
| t0150237 | 20 | 1 CAAAAGCAATCGCGGTTTTT       | miRNA | hsa-mir-548e   |
| t0150742 | 18 | 1 ACGCATAATATGGACATG         | miRNA | hsa-mir-3912   |
| t0151296 | 18 | 1 GCCCTGACCTGTCCTGTT         | miRNA | hsa-mir-4732   |
| t0152062 | 22 | 1 CTAGCACCATCTGAAATCGGTT     | miRNA | hsa-mir-29a    |
| t0152110 | 23 | 1 CTGGTTTCACATGGTGGCTTAGA    | miRNA | hsa-mir-29b-2  |
| t0152143 | 19 | 1 TCACAGTGGCTAAGTTCCG        | miRNA | hsa-mir-27a    |
| t0152202 | 19 | 1 TTCTTCTTAGACATGGCAA        | miRNA | hsa-mir-4659a  |
| t0152274 | 19 | 1 GTGCTTACAGTGCAGGTAG        | miRNA | hsa-mir-106a   |
| t0152682 | 19 | 1 CAAGTAATCCAGGATAGGC        | miRNA | hsa-mir-26a-2  |
| t0152715 | 20 | 1 CCTCCTGCCCTCCTTGCTGT       | miRNA | hsa-mir-1976   |
| t0152791 | 23 | 1 TTATAAAGCAATGAGACTGATTG    | miRNA | hsa-mir-340    |
| t0152825 | 21 | 1 TTCTAGGTATGGTCCCAGGGA      | miRNA | hsa-mir-331    |
| t0153303 | 19 | 1 TCCCTGAGACCCTTTAACC        | miRNA | hsa-mir-125a   |
| t0153569 | 20 | 1 TACTGCAGTGAAGGCACTTG       | miRNA | hsa-mir-17     |
| t0154176 | 20 | 1 GCTGCCAGTTGAAGA ACTGT      | miRNA | hsa-mir-22     |
| t0154714 | 22 | 1 TGCACAGCAAGTGTAGACAGGC     | miRNA | hsa-mir-3120   |
| t0154788 | 21 | 1 TGGCAATGGTAGAACTCACAC      | miRNA | hsa-mir-182    |
| t0156143 | 21 | 1 ACGTTGGCTCTGGTGGTGATG      | miRNA | hsa-mir-1306   |
| t0156454 | 18 | 1 ATCCTGTACTGAGCTGCC         | miRNA | hsa-mir-486    |
| t0156544 | 20 | 1 ACGGGTTAGGCTCTTGGGAG       | miRNA | hsa-mir-125b-1 |
| t0157001 | 22 | 1 TAAACATCCTACACTCTCAGCT     | miRNA | hsa-mir-30c-1  |
| t0157052 | 21 | 1 CCAAAGGTGAATTTTTTGGGA      | miRNA | hsa-mir-186    |
| t0157185 | 21 | 1 TTCTCCCAACGTAAGCCAGC       | miRNA | hsa-mir-629    |
| t0157793 | 22 | 1 AACTGGCCTACAAAGTCCAGT      | miRNA | hsa-mir-193a   |
| t0158340 | 24 | 1 AGTGCAATATTGCTTATAGGGTTT   | miRNA | hsa-mir-454    |
| t0158569 | 23 | 1 TTATGGTTTGCCTGGGACTGAGG    | miRNA | hsa-mir-584    |
| t0158672 | 20 | 1 CAAA AACTGTAATTACTTTT      | miRNA | hsa-mir-548f-4 |
| t0159169 | 23 | 1 AGGTTGGGATCGGTTGCAATGCT    | miRNA | hsa-mir-92a-1  |
| t0159599 | 21 | 1 CGGCCCCACGCACCAGGGTAA      | miRNA | hsa-mir-874    |
| t0159668 | 25 | 1 AGTGCAATATTGCTTATAGGGTTTT  | miRNA | hsa-mir-454    |
| t0159677 | 22 | 1 CTTAGCAGTTGTATTATCATT      | miRNA | hsa-mir-374b   |
| t0159808 | 21 | 1 TACTGCAGTGAAGGCACTTGT      | miRNA | hsa-mir-17     |
| t0160466 | 21 | 1 ATCACATTGCCAGGGATTTCC      | miRNA | hsa-mir-23a    |
| t0160471 | 20 | 1 TTTGCCACACTGCAACACCT       | miRNA | hsa-mir-3064   |

|          |    |                              |       |                |
|----------|----|------------------------------|-------|----------------|
| t0160776 | 20 | 1 GTACAAAAGCAATCGCGGTT       | miRNA | hsa-mir-548e   |
| t0160966 | 21 | 1 CAGTGGTTTTACCCTATGGTA      | miRNA | hsa-mir-140    |
| t0161289 | 18 | 1 TGAGGGGCAGAGAGCGAG         | miRNA | hsa-mir-423    |
| t0161680 | 23 | 1 TAGCACCATTTGAAATCGGTTAT    | miRNA | hsa-mir-29c    |
| t0161693 | 26 | 1 AAGGAAACCGTTACCATTACTGAGTT | miRNA | hsa-mir-451a   |
| t0162078 | 20 | 1 TGTTGTACTTTTTTTTTTGT       | miRNA | hsa-mir-3613   |
| t0162382 | 19 | 1 TATATATATATATGTACGT        | miRNA | hsa-mir-1277   |
| t0162462 | 21 | 1 AGTTCCTTACAGTGCTGCCT       | miRNA | hsa-mir-103a-2 |
| t0162571 | 22 | 1 CTAGCGGGGATTCCAATATTGG     | miRNA | hsa-mir-4781   |
| t0162706 | 18 | 1 TAATCCTTGCTACCTGGG         | miRNA | hsa-mir-500b   |
| t0162738 | 20 | 1 CCTCCGTGTTACCTGTCCTC       | miRNA | hsa-mir-3605   |
| t0162821 | 20 | 1 AGCATTGTACAGGGCTATGA       | miRNA | hsa-mir-103a-1 |
| t0163541 | 21 | 1 TAACTGGTTGAACAACACTGAAC    | miRNA | hsa-mir-582    |
| t0163565 | 19 | 1 AACATTCATTGTTGTCGGT        | miRNA | hsa-mir-181d   |
| t0163716 | 20 | 1 AACCATCGACCGTTGATTGT       | miRNA | hsa-mir-181a-1 |
| t0163888 | 22 | 1 AGGCAGTGTATTGCTAGCGGCT     | miRNA | hsa-mir-449c   |
| t0163921 | 20 | 1 GTAGTACCAGTACCTTGTGT       | miRNA | hsa-mir-624    |
| t0163983 | 25 | 1 TGAGGTAGTAGATTGTATAGTTGTG  | miRNA | hsa-let-7f-1   |
| t0164052 | 22 | 1 GCAAAGCACACGGCCTGCAGAG     | miRNA | hsa-mir-330    |
| t0164079 | 23 | 1 TGTGCTTGCTCGTCCCGCCGCA     | miRNA | hsa-mir-636    |
| t0164316 | 21 | 1 AGAATTGCGTTTGACAATCA       | miRNA | hsa-mir-2964a  |
| t0164359 | 19 | 1 TCCCCAGGTGTGATTCTG         | miRNA | hsa-mir-361    |
| t0164419 | 18 | 1 TAGGTAGTTTCTGTTGT          | miRNA | hsa-mir-196b   |
| t0164451 | 20 | 1 TATACAAGGGCAAGCTCTCT       | miRNA | hsa-mir-381    |
| t0164885 | 23 | 1 CAGTACTGTGATAACTGAAGAAT    | miRNA | hsa-mir-101-2  |
| t0165429 | 19 | 1 GCTGCCAGTTGAAGAACTG        | miRNA | hsa-mir-22     |
| t0165468 | 21 | 1 TATACGACCTGCTGCCTTTCT      | miRNA | hsa-let-7d     |
| t0165482 | 19 | 1 CAGCTGCCTGGGAGTGACT        | miRNA | hsa-mir-1301   |
| t0165509 | 26 | 1 AAAGTATTGCACTTGTCCCGGCCTGT | miRNA | hsa-mir-92a-2  |
| t0165889 | 23 | 1 TTTTGGCAATGGTAGAACTCACA    | miRNA | hsa-mir-182    |
| t0165899 | 24 | 1 TCAGAACAAATGCCGGTCCCAGA    | miRNA | hsa-mir-589    |
| t0166177 | 22 | 1 GCTCTGACTTTATTGCACTACT     | miRNA | hsa-mir-301a   |
| t0166179 | 21 | 1 TGAGGAGATCGTCGAGGTTGG      | miRNA | hsa-mir-3150b  |
| t0166442 | 21 | 1 AACCCGTAGATCCGAACCTGT      | miRNA | hsa-mir-100    |
| t0166646 | 20 | 1 AAAAGTAATCACAGTTTTTG       | miRNA | hsa-mir-548f-1 |
| t0166704 | 21 | 1 GCAGTGCAATGATGAAAGGGC      | miRNA | hsa-mir-130b   |
| t0166761 | 21 | 1 ATGGCATCGTCCCCTGGTGGC      | miRNA | hsa-mir-4642   |
| t0166793 | 19 | 1 TCTTTACAGTGCTGCCTTG        | miRNA | hsa-mir-103a-1 |
| t0167101 | 20 | 1 TACTGCCCTAAGTGCTCCTT       | miRNA | hsa-mir-18a    |
| t0167165 | 20 | 1 CTGTACAGGCCACTGCCTTG       | miRNA | hsa-let-7g     |
| t0167248 | 21 | 1 TTTTGAATATGTTCTGAAT        | miRNA | hsa-mir-450b   |
| t0167942 | 20 | 1 TGATATGTTTGATATATTAG       | miRNA | hsa-mir-190a   |
| t0168382 | 19 | 1 ATGGCACTGGTAGAATTCA        | miRNA | hsa-mir-183    |
| t0168440 | 22 | 1 AGTTGTTTCGTGGTGGATTTCGCT   | miRNA | hsa-mir-382    |
| t0168747 | 20 | 1 TCTGTATTCTCCTTGCCTG        | miRNA | hsa-mir-4742   |
| t0168860 | 18 | 1 TTCAACGCTGTCGGTGAG         | miRNA | hsa-mir-181a-1 |
| t0168947 | 23 | 1 AAAGTGCTTATAGTGCAGGTAGT    | miRNA | hsa-mir-20a    |
| t0169160 | 21 | 1 TGAGACCTCTGGGTTCTGAGC      | miRNA | hsa-mir-769    |
| t0169181 | 19 | 1 TAGTGCAATATTGCTTATA        | miRNA | hsa-mir-454    |
| t0169228 | 21 | 1 CAAAAACCGCAATTATTTTTG      | miRNA | hsa-mir-548k   |
| t0169416 | 18 | 1 TCTCCAACCCTTGACC           | miRNA | hsa-mir-150    |
| t0169801 | 21 | 1 AGCAGCACATCATGGTTTACA      | miRNA | hsa-mir-15b    |
| t0169960 | 18 | 1 TTTAGGATAAGCTTGACT         | miRNA | hsa-mir-651    |
| t0170007 | 19 | 1 CAGTGGTTTTACCCTATGG        | miRNA | hsa-mir-140    |
| t0170393 | 23 | 1 TGACACGATCACTCCCGTTGAGT    | miRNA | hsa-mir-425    |
| t0170405 | 20 | 1 TGTCTCCAACCCTTGACC         | miRNA | hsa-mir-150    |
| t0170562 | 20 | 1 TCAGAACAAATGCCGGTCC        | miRNA | hsa-mir-589    |
| t0171144 | 23 | 1 GTCCAGTTTTCCAGGAATCCCT     | miRNA | hsa-mir-145    |

|          |    |                             |       |                |
|----------|----|-----------------------------|-------|----------------|
| t0171212 | 18 | 1 TCTAGTAAGAGTGGCAGT        | miRNA | hsa-mir-628    |
| t0171431 | 23 | 1 TAATGCTAATCGTGATAGGGGTT   | miRNA | hsa-mir-155    |
| t0171782 | 19 | 1 TTTCTTCTTAGACATGGCA       | miRNA | hsa-mir-4659b  |
| t0171827 | 19 | 1 AACACAAGGTATTGGTATT       | miRNA | hsa-mir-624    |
| t0171847 | 21 | 1 TGGAAGACTAGTGATTTTGTT     | miRNA | hsa-mir-7-3    |
| t0172017 | 23 | 1 CCTCTCACCCTGCCCTCCCACA    | miRNA | hsa-mir-1229   |
| t0172170 | 20 | 1 ACTGCCCTAAGTGCTCCTTC      | miRNA | hsa-mir-18a    |
| t0172555 | 20 | 1 TTAATTTTTTGTTCGGTCA       | miRNA | hsa-mir-4775   |
| t0173332 | 19 | 1 ATGCACCTGGGCAAGGATT       | miRNA | hsa-mir-502    |
| t0173356 | 19 | 1 TAGACTGAAGCTCCTTGAG       | miRNA | hsa-mir-151a   |
| t0173745 | 19 | 1 ATAACATTGTAAAGCGCTT       | miRNA | hsa-mir-3143   |
| t0173950 | 21 | 1 CTGAGGTAGTAGTTTGTGCTG     | miRNA | hsa-let-7i     |
| t0174295 | 20 | 1 ACATATGGAAAGACTTTGCC      | miRNA | hsa-mir-3688-2 |
| t0174362 | 23 | 1 CCAAAGAATTCTCCTTTGGGCT    | miRNA | hsa-mir-186    |
| t0174383 | 20 | 1 GTTCACAGTGGCTAAGTTCT      | miRNA | hsa-mir-27b    |
| t0175077 | 19 | 1 CCATGACGTCACAGAGGCT       | miRNA | hsa-mir-4757   |
| t0175135 | 21 | 1 GACGTTGGCTCTGGTGGTGAT     | miRNA | hsa-mir-1306   |
| t0175425 | 21 | 1 GACTCCAAGAAGAATCTAGAC     | miRNA | hsa-mir-5695   |
| t0175663 | 23 | 1 TCGTACCGTGAGTAATAATGCGC   | miRNA | hsa-mir-126    |
| t0175684 | 23 | 1 TCTCTGGGCCTGTGTCTTAGGCT   | miRNA | hsa-mir-330    |
| t0175723 | 21 | 1 ACCACTGACCGTTGACTGTAC     | miRNA | hsa-mir-181a-2 |
| t0176115 | 18 | 1 AAGTAATTCAGGATAGGT        | miRNA | hsa-mir-26b    |
| t0176149 | 21 | 1 TACCCAGTCTCCGGTGCAGCC     | miRNA | hsa-mir-3130-2 |
| t0176387 | 20 | 1 TGAGAACTGAATCCATGGG       | miRNA | hsa-mir-146a   |
| t0177275 | 18 | 1 CAGTATAGATGATGTACT        | miRNA | hsa-mir-144    |
| t0177524 | 19 | 1 GTGCACTACAGAACTTTGT       | miRNA | hsa-mir-148a   |
| t0177683 | 22 | 1 TGGGGCGGAGCTTCCGGAGGCC    | miRNA | hsa-mir-3180-5 |
| t0177811 | 20 | 1 TATCAGATTGTATTGTAATT      | miRNA | hsa-mir-374a   |
| t0178077 | 21 | 1 TGAATGGCGCCACTAGGGTTG     | miRNA | hsa-mir-652    |
| t0178190 | 22 | 1 TAGTACTGTGCATATCATCTAT    | miRNA | hsa-mir-1278   |
| t0178877 | 23 | 1 GATTGTTGTACTTTTTTTTTTGT   | miRNA | hsa-mir-3613   |
| t0179307 | 24 | 1 AAAAGCTGGGTTGAGAGGGCAAAA  | miRNA | hsa-mir-320b-2 |
| t0179551 | 20 | 1 AGCAATACTGTTACCTGAAA      | miRNA | hsa-mir-3942   |
| t0179760 | 21 | 1 AGGGCTTCTCTCTGCAGGAC      | miRNA | hsa-mir-3158-2 |
| t0180017 | 21 | 1 ACTATAGAACTTTCCCCCTCA     | miRNA | hsa-mir-625    |
| t0180179 | 18 | 1 TCAGGCTCAGTCCCCTCC        | miRNA | hsa-mir-484    |
| t0180948 | 22 | 1 TGTA AACATCCTCGACTGGAAG   | miRNA | hsa-mir-30a    |
| t0181519 | 23 | 1 ACATTCAACGCTGTCCGGT GAGTT | miRNA | hsa-mir-181a-1 |
| t0181696 | 21 | 1 CGTTACCATTACTGAGTTTAG     | miRNA | hsa-mir-451a   |
| t0181910 | 21 | 1 TGTCCTCTAGGGCCTGCAGTC     | miRNA | hsa-mir-3909   |
| t0181986 | 22 | 1 CCACTTGGATCTGAAGGCTGCC    | miRNA | hsa-mir-3614   |
| t0182022 | 22 | 1 GTCATTTTTGTGATCTGCAGCT    | miRNA | hsa-mir-153-1  |
| t0182371 | 21 | 1 CTCGGTCTGAGGCCCTCAGT      | miRNA | hsa-mir-423    |
| t0182463 | 20 | 1 TGCTCTGACTTTATTGCACT      | miRNA | hsa-mir-301a   |
| t0182749 | 22 | 1 TATCAGATTGTATTGTAATTGT    | miRNA | hsa-mir-374a   |
| t0183222 | 20 | 1 CTCACTGAACAATGAATGCA      | miRNA | hsa-mir-181b-1 |
| t0183902 | 19 | 1 CATCGGGAATGTCGTGCC        | miRNA | hsa-mir-425    |
| t0183915 | 19 | 1 GAATCATTATTTGCTGCTC       | miRNA | hsa-mir-15b    |
| t0184320 | 23 | 1 CTGGTGCAAAAGTAATGGCGGTT   | miRNA | hsa-mir-548q   |
| t0184360 | 22 | 1 ACTTATCAGATTGTATTGTAAT    | miRNA | hsa-mir-374a   |
| t0184912 | 20 | 1 CTCGTACCGTGAGTAATAAT      | miRNA | hsa-mir-126    |
| t0186216 | 20 | 1 TGTCAGTTTGTCAAATACCC      | miRNA | hsa-mir-223    |
| t0186376 | 22 | 1 TAGCAGCGGGAACAGTTCTGCA    | miRNA | hsa-mir-503    |
| t0186635 | 18 | 1 GTAAACATCCTTGACTGG        | miRNA | hsa-mir-30e    |
| t0186927 | 20 | 1 ACGCATAATATGGACATGTT      | miRNA | hsa-mir-3912   |
| t0186958 | 19 | 1 TCTGTATTCTCCTTTGCCCT      | miRNA | hsa-mir-4742   |
| t0186974 | 22 | 1 AGACTGAAGCTCCTTGAGGACA    | miRNA | hsa-mir-151a   |
| t0187153 | 25 | 1 GTACAGTACTGTGATAACTGAAGAA | miRNA | hsa-mir-101-2  |



|          |    |                             |       |                |
|----------|----|-----------------------------|-------|----------------|
| t0187420 | 25 | 1 CAACGGAATCCCAAAAGCAGCTGTT | miRNA | hsa-mir-191    |
| t0187713 | 20 | 1 ATGGGGCTTCTGTAGAGATT      | miRNA | hsa-mir-3675   |
| t0188355 | 24 | 1 GGCTGAGGTAGTAGTTTGTGCTGT  | miRNA | hsa-let-7i     |
| t0188660 | 20 | 1 TAACATTGTAAAGCGCTTCT      | miRNA | hsa-mir-3143   |
| t0188825 | 18 | 1 TACTGTAGTATGGGCACT        | miRNA | hsa-mir-20b    |
| t0189012 | 21 | 1 CTATACAACCTACTACTTTCC     | miRNA | hsa-mir-98     |
| t0189470 | 24 | 1 TACCCTGTAGATCCGAATTTGTGT  | miRNA | hsa-mir-10a    |
| t0190038 | 21 | 1 TAATGCCCTAAAAATCCTTA      | miRNA | hsa-mir-365b   |
| t0190955 | 20 | 1 AAAGCTGGGTTGAGAGGGCA      | miRNA | hsa-mir-320b-2 |
| t0191392 | 23 | 1 GTGAGGTAGTAGATTGTATAGTT   | miRNA | hsa-let-7f-1   |
| t0191480 | 24 | 1 GTAAACATCCTTGACTGGAAGCTG  | miRNA | hsa-mir-30e    |
| t0191618 | 21 | 1 AGCGCCTCGACGACAGAGCCG     | miRNA | hsa-mir-339    |
| t0191674 | 18 | 1 GTGCTCATAGTGCAGGTA        | miRNA | hsa-mir-20b    |
| t0191966 | 20 | 1 CATCGGGAATGTCGTGTCCG      | miRNA | hsa-mir-425    |
| t0192159 | 19 | 1 TGTTCTCTGTCTCCCAGA        | miRNA | hsa-mir-4326   |
| t0193004 | 19 | 1 ACCCTGTAGATCCGAATTT       | miRNA | hsa-mir-10a    |
| t0193511 | 20 | 1 ACCCTGTAGAACCGAATTTG      | miRNA | hsa-mir-10b    |
| t0193649 | 21 | 1 AGTGCAATAGTATTGTCAAAG     | miRNA | hsa-mir-301a   |
| t0193746 | 21 | 1 ATCGGGAATGTCGTGTCCGCC     | miRNA | hsa-mir-425    |
| t0193772 | 20 | 1 CACAGGGTAGAACCACGGAC      | miRNA | hsa-mir-140    |
| t0194455 | 22 | 1 GTGAGTCTCTAAGAAAAGAGGA    | miRNA | hsa-mir-627    |
| t0195668 | 21 | 1 AGTGTTCCTACTTTATGGAT      | miRNA | hsa-mir-142    |
| t0195827 | 19 | 1 TATCAGACTGATGTTGACT       | miRNA | hsa-mir-21     |
| t0195934 | 19 | 1 TACCCTGTAGATCCGAATT       | miRNA | hsa-mir-10a    |
| t0196018 | 22 | 1 TCACACAGAAATCGCACCCGTC    | miRNA | hsa-mir-342    |
| t0196286 | 22 | 1 ATCAAGGATCTTAACTTTGCC     | miRNA | hsa-mir-561    |
| t0196506 | 20 | 1 CATCCTGACTGAGCTGCC        | miRNA | hsa-mir-486    |
| t0197182 | 23 | 1 ATGGTAATGGTTCTCTTGCTATA   | miRNA | hsa-mir-451a   |
| t0197829 | 21 | 1 GATAACTATACAATCTACTGT     | miRNA | hsa-let-7a-3   |
| t0198678 | 23 | 1 TCGAGGAGCTCACAGTCTAGTAT   | miRNA | hsa-mir-151a   |
| t0198766 | 22 | 1 TGTATGGCACTGGTAGAATCA     | miRNA | hsa-mir-183    |
| t0198858 | 23 | 1 CTTACCACCTTCTCCACCCAGC    | miRNA | hsa-mir-197    |
| t0199018 | 18 | 1 TACCACAGGGTAGAACCA        | miRNA | hsa-mir-140    |
| t0199584 | 21 | 1 GCCCCGGGCAGTGTGATCATC     | miRNA | hsa-mir-5587   |
| t0199670 | 25 | 1 TGAGAACTGAATCCATAGGCTGTG  | miRNA | hsa-mir-146b   |
| t0199996 | 18 | 1 TATAGGACTCATATAGTG        | miRNA | hsa-mir-3117   |
| t0200657 | 23 | 1 ACATTCATTGCTGTGCGTGGGTT   | miRNA | hsa-mir-181b-2 |
| t0200778 | 21 | 1 AAATTGCACGGTATCCATCTG     | miRNA | hsa-mir-363    |
| t0200833 | 18 | 1 ATCAGACTGATGTTGACT        | miRNA | hsa-mir-21     |
| t0201005 | 22 | 1 TATTGCACACTACTAAGTTGCA    | miRNA | hsa-mir-32     |
| t0201028 | 23 | 1 GTATTGCACTTGTCCCGCCTGT    | miRNA | hsa-mir-92a-2  |
| t0201464 | 18 | 1 TCAAAGTGCTTACAGTGC        | miRNA | hsa-mir-17     |
| t0201469 | 20 | 1 GAGGTAGTAGGTTGCATAGT      | miRNA | hsa-let-7d     |
| t0201514 | 21 | 1 TCAGAACAAATGCCGGTTCCC     | miRNA | hsa-mir-589    |
| t0202330 | 19 | 1 CCTGTACTIONGACTGCCCCG     | miRNA | hsa-mir-486    |
| t0202733 | 20 | 1 GCCCCTGGGCCTATCCTAGA      | miRNA | hsa-mir-331    |
| t0203307 | 19 | 1 TACCGCACTGTGGGTACTT       | miRNA | hsa-mir-106b   |
| t0203494 | 19 | 1 TTGTGGCTGGTCATGAGGC       | miRNA | hsa-mir-4474   |
| t0203725 | 21 | 1 TAGGTAGTTTCTGTTGTTGG      | miRNA | hsa-mir-196b   |
| t0203758 | 20 | 1 AGGTAGTAGGTTGCATAGTT      | miRNA | hsa-let-7d     |
| t0204185 | 21 | 1 AAGTGCTGTTGTCGTCAGGTAG    | miRNA | hsa-mir-93     |
| t0204200 | 19 | 1 ATAAAGTAGAAAGCACTAC       | miRNA | hsa-mir-142    |
| t0204335 | 19 | 1 CATCCTGACTGAGCTGCC        | miRNA | hsa-mir-486    |
| t0204666 | 20 | 1 TTCTAATTTCTCCACGCTT       | miRNA | hsa-mir-576    |
| t0204710 | 21 | 1 TCGGATCCGTCTGAGCTTGGC     | miRNA | hsa-mir-127    |
| t0206078 | 18 | 1 CAAAGTGCTCATAGTGCA        | miRNA | hsa-mir-20b    |
| t0206845 | 23 | 1 CGCATCCCCTAGGGCATTGGTGT   | miRNA | hsa-mir-324    |
| t0206945 | 22 | 1 GTGAGGTAGTAGATTGTATAGT    | miRNA | hsa-let-7f-1   |

|          |    |                             |       |                |
|----------|----|-----------------------------|-------|----------------|
| t0207200 | 19 | 1 ACAGTGAGGTAGAGGGAGT       | miRNA | hsa-mir-3138   |
| t0207585 | 20 | 1 CAGCATTGTACAGGGCTATG      | miRNA | hsa-mir-103a-1 |
| t0207738 | 23 | 1 ACTGGACTTGGAGTCAGAAAGGCC  | miRNA | hsa-mir-378a   |
| t0207838 | 21 | 1 CCTCTCACCCTGCCCTCCCA      | miRNA | hsa-mir-1229   |
| t0207904 | 25 | 1 AACATCAACGCTGTCGGTGAGTTT  | miRNA | hsa-mir-181a-1 |
| t0208092 | 21 | 1 CTAAGTGCTTATAGTGCAGG      | miRNA | hsa-mir-20a    |
| t0208336 | 20 | 1 TCACCACCTTCTCCACCCAG      | miRNA | hsa-mir-197    |
| t0208613 | 18 | 1 CTATACAATCTACTGTCT        | miRNA | hsa-let-7a-3   |
| t0209184 | 20 | 1 TTTTCTTCTTAGACATGGCA      | miRNA | hsa-mir-4659b  |
| t0210513 | 22 | 1 AGGGGGAAAGTTCTATAGTCCT    | miRNA | hsa-mir-625    |
| t0210628 | 25 | 1 GATGAGGATGGATAGCAAGGAAGCC | miRNA | hsa-mir-3605   |
| t0210727 | 18 | 1 TCAGTTATCACAGTGCTG        | miRNA | hsa-mir-101-1  |
| t0210785 | 21 | 1 ATGAGGTAGTAGGTTGTATAG     | miRNA | hsa-let-7a-1   |
| t0210799 | 19 | 1 CGGGGCCGTAGCACTGTCT       | miRNA | hsa-mir-128-1  |
| t0211590 | 20 | 1 ACTTAGCAGGTTGTATTATC      | miRNA | hsa-mir-374b   |
| t0211591 | 19 | 1 CCACCTCCCCTGCAAACGT       | miRNA | hsa-mir-1306   |
| t0211645 | 24 | 1 GGAACATTCAACGCTGTCGGTGAG  | miRNA | hsa-mir-181a-2 |
| t0212006 | 23 | 1 AAAGCTGCCAGTTGAAGAACTGT   | miRNA | hsa-mir-22     |
| t0212699 | 21 | 1 TTCATTGGACTGCTGATGGCC     | miRNA | hsa-mir-4529   |
| t0212795 | 20 | 1 AGGGAGCTGTAGAGCAGGGA      | miRNA | hsa-mir-4732   |
| t0212997 | 23 | 1 CGGCCCCACGCACCAGGGTAAGA   | miRNA | hsa-mir-874    |
| t0213046 | 20 | 1 TGCCTGAGGGAGTAAGAGTC      | miRNA | hsa-mir-550a-3 |
| t0213290 | 20 | 1 GAAGAAGTGTGCATTTGCC       | miRNA | hsa-mir-4511   |
| t0213493 | 21 | 1 GCTTTCAGTCGGATGTTTACA     | miRNA | hsa-mir-30e    |
| t0213617 | 22 | 1 AAAAGTAATTGTGGATTTTGTCT   | miRNA | hsa-mir-548ab  |
| t0213771 | 22 | 1 ACAAAGCAATCGCGTTTTTGTG    | miRNA | hsa-mir-548e   |
| t0213813 | 19 | 1 CTATACAACCTTACTACTTT      | miRNA | hsa-mir-98     |
| t0213905 | 20 | 1 ACGCCCTTCCCCCCTTCTT       | miRNA | hsa-mir-1249   |
| t0213943 | 22 | 1 ACCATCGACCGTTGATTGTACC    | miRNA | hsa-mir-181a-1 |
| t0214046 | 23 | 1 AAAGTGCTTACAGTGCAGGTAGT   | miRNA | hsa-mir-17     |
| t0214067 | 20 | 1 TGAGGTAGGAGGTTGTATAG      | miRNA | hsa-let-7e     |
| t0214282 | 21 | 1 TCACACCTGCCTCGCCCCCA      | miRNA | hsa-mir-1228   |
| t0214370 | 18 | 1 ACTGGCATTAGTGGGACT        | miRNA | hsa-mir-5588   |
| t0214468 | 19 | 1 AGGTAGTAGTTTGTACAGT       | miRNA | hsa-let-7g     |
| t0214881 | 21 | 1 CTAAGTGCTGACAGTGCAGA      | miRNA | hsa-mir-106b   |
| t0214983 | 20 | 1 CACCTTGCCTACTCAGGTC       | miRNA | hsa-mir-3200   |
| t0215197 | 22 | 1 AAGAGGTAGTAGGTTGCATAGT    | miRNA | hsa-let-7d     |
| t0215857 | 19 | 1 AAAGTGCTGTTTCGTGCAGG      | miRNA | hsa-mir-93     |
| t0216060 | 24 | 1 TACAGTACTGTGATAACTGAAGGA  | miRNA | hsa-mir-101-1  |
| t0216220 | 23 | 1 AACGCATAATATGGACATGTTAT   | miRNA | hsa-mir-3912   |
| t0216250 | 19 | 1 TATTGCACATTAAGTT          | miRNA | hsa-mir-32     |
| t0216422 | 23 | 1 AAGAGGTAGTAGGTTGCATAGTT   | miRNA | hsa-let-7d     |
| t0216954 | 23 | 1 ACAACAGTGCCAACCTCACAGGA   | miRNA | hsa-mir-1294   |
| t0217095 | 22 | 1 ATGAGGATGGATAGCAAGGAAG    | miRNA | hsa-mir-3605   |
| t0217210 | 19 | 1 AAAGTGCTTACAGTGCAGG       | miRNA | hsa-mir-106a   |
| t0217411 | 20 | 1 TGGGACTGATCTTGATGTCT      | miRNA | hsa-mir-3913-2 |
| t0218178 | 18 | 1 AGTAATCCAGGATAGGCT        | miRNA | hsa-mir-26a-2  |
| t0218266 | 22 | 1 TCTCCCTTCTGCCCTGGCTAG     | miRNA | hsa-mir-4685   |
| t0218280 | 19 | 1 GCTACATTGTCTGCTGGGT       | miRNA | hsa-mir-221    |
| t0218467 | 23 | 1 CTAGACTGAAGCTCCTTGAGGAC   | miRNA | hsa-mir-151a   |
| t0218573 | 21 | 1 ACACCAGTCGATGGGCTGTCT     | miRNA | hsa-mir-21     |
| t0218637 | 22 | 1 CGGGTAGAGAGGGCAGTGGGAG    | miRNA | hsa-mir-197    |
| t0218728 | 19 | 1 TCTCCAACCCTTGACCA         | miRNA | hsa-mir-150    |
| t0219034 | 19 | 1 AAGTGCTGACAGTGCAGAT       | miRNA | hsa-mir-106b   |
| t0219157 | 22 | 1 TCTTTTCTTTGAGACTCACTAC    | miRNA | hsa-mir-627    |
| t0219570 | 21 | 1 CTCCGTTTGCCTGTTTCGCTG     | miRNA | hsa-mir-1468   |
| t0219706 | 24 | 1 ATGGCACTGGTAGAATCACTGTG   | miRNA | hsa-mir-183    |
| t0219908 | 19 | 1 TACTGTAGTATGGGCACTT       | miRNA | hsa-mir-20b    |

|          |    |                           |       |                |
|----------|----|---------------------------|-------|----------------|
| t0220357 | 20 | 1 GTGCAAATCCATGCAAAACT    | miRNA | hsa-mir-19b-2  |
| t0221266 | 21 | 1 GCAGCACGTAATATTGGCGT    | miRNA | hsa-mir-16-2   |
| t0221444 | 21 | 1 TAGTTCTTCAGTGGCAAGCTT   | miRNA | hsa-mir-22     |
| t0221541 | 20 | 1 GGAGGAACCTTGGAGCTTCG    | miRNA | hsa-mir-3928   |
| t0221903 | 20 | 1 TGCAAATCCATGCAAAACTG    | miRNA | hsa-mir-19b-2  |
| t0223159 | 20 | 1 TCAAAGTGCTTACAGTGCAG    | miRNA | hsa-mir-17     |
| t0223163 | 18 | 1 CACCTTGCGCTACTCAGG      | miRNA | hsa-mir-3200   |
| t0223344 | 23 | 1 TCCTCTTTTCTTTGAGACTCACT | miRNA | hsa-mir-627    |
| t0223946 | 19 | 1 CCTCTCACCCTGCCCTCC      | miRNA | hsa-mir-1229   |
| t0224341 | 20 | 1 AACTATACAATCTATTGCCT    | miRNA | hsa-let-7f-1   |
| t0224392 | 22 | 1 CAAAACGTGAGGCGCTGCTATA  | miRNA | hsa-mir-424    |
| t0224432 | 21 | 1 AAGAGGTATAGGGCATGGGAA   | miRNA | hsa-mir-202    |
| t0224457 | 18 | 1 CGTAGATCCGAACTTGTG      | miRNA | hsa-mir-100    |
| t0224645 | 22 | 1 CGTCAACACTTGCTGGTTTCCT  | miRNA | hsa-mir-505    |
| t0225028 | 22 | 1 TAGCACCATCTGAAATCGGTTA  | miRNA | hsa-mir-29a    |
| t0226237 | 18 | 1 TATCAGACTGATGTTGAC      | miRNA | hsa-mir-21     |
| t0227115 | 18 | 1 CAAATCCATGCAAAACTG      | miRNA | hsa-mir-19b-2  |
| t0227632 | 22 | 1 AAAAGTAATTGTGGTTTTTGCC  | miRNA | hsa-mir-548d-2 |
| t0227773 | 18 | 1 TTGCACGGTATCCATCTG      | miRNA | hsa-mir-363    |
